# Supplementary material for: Comparative Transcriptomics of Root Development in Wild and Cultivated Carrots
Source: Genes (Basel). 2018 Aug 24;9(9):431. doi: 10.3390/genes9090431 (PMC6162504; doi:10.3390/genes9090431)
Supplement: Supplementary file 1 [file genes-09-00431-s001.zip › Supplementary Figures S1-S3.pdf]

S1

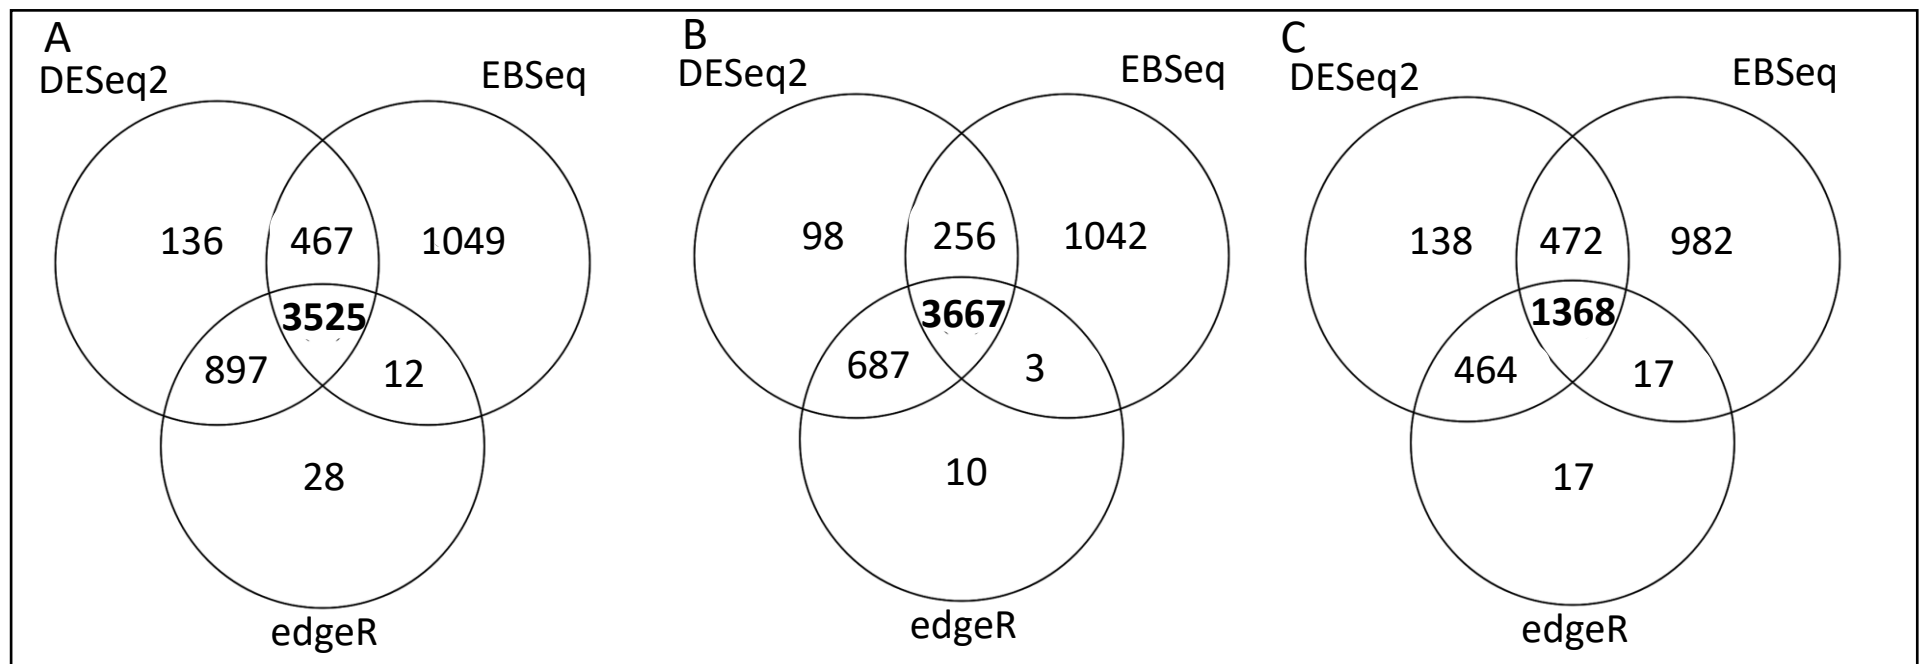

**Figure S1.** Venn diagrams representing numbers of DEGs identified with three different algorithms for the wild *D. carota* subsp. *commutatus* in comparisons between time points T1 vs. T2 – wDEG.1.2 (A), T1 vs. T3 – wDEG.1.3 (B), and T2 vs. T3 – wDEG2.3 (C). Only DEGs confirmed by all three methods were used for subsequent analyses.

S2

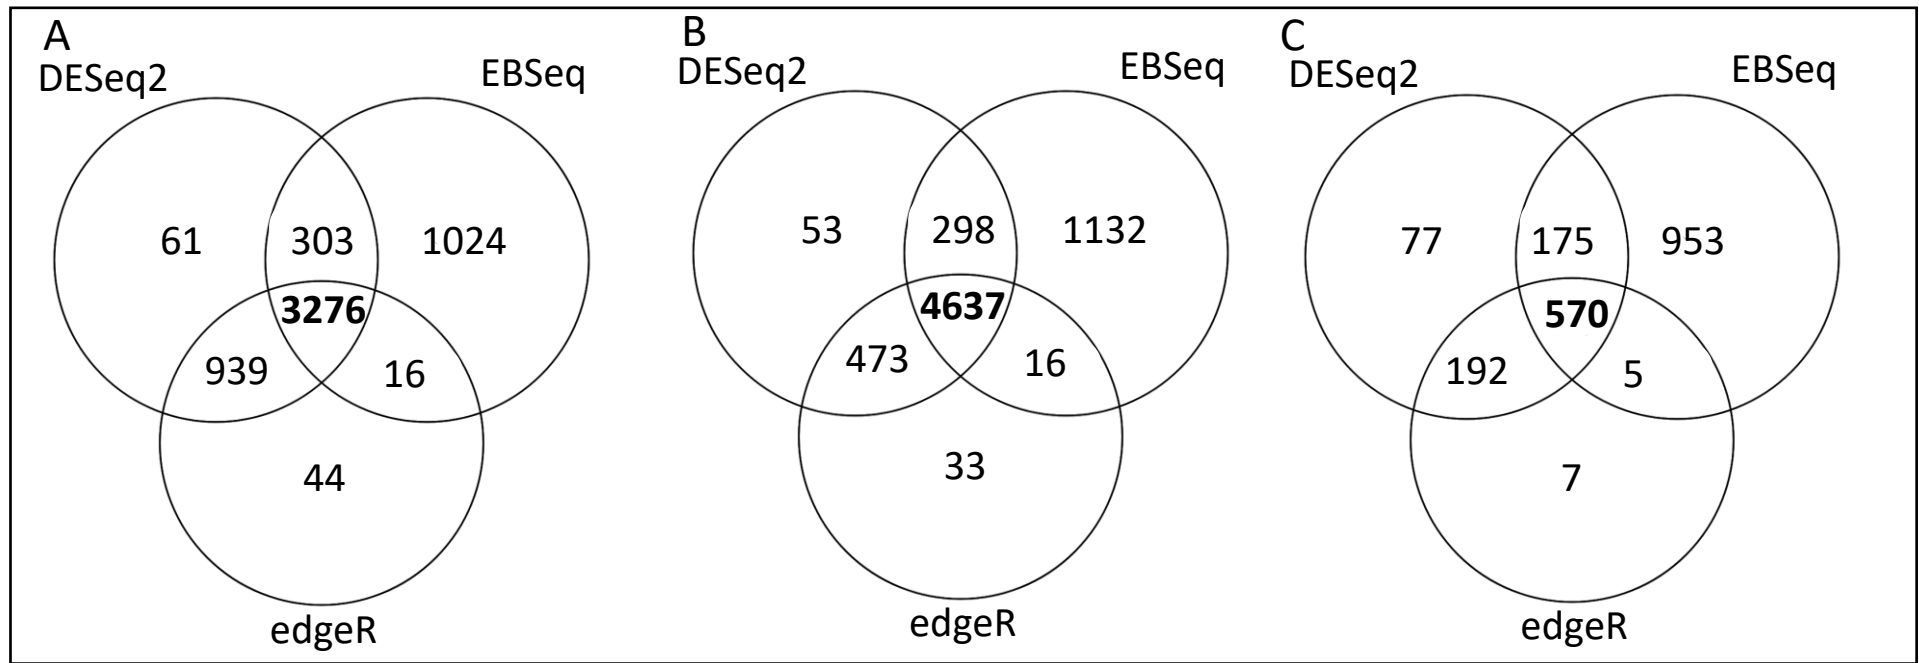

**Figure S2.** Venn diagrams representing numbers of DEGs identified with three different algorithms for the cultivated *D. carota* subsp. *sativus* 2874B in comparisons between time points T1 vs. T2 – cDEG.1.2 (A), T1 vs. T3 – cDEG.1.3 (B), and T2 vs. T3 – cDEG2.3 (C). Only DEGs confirmed by all three methods were used for subsequent analyses.

S3

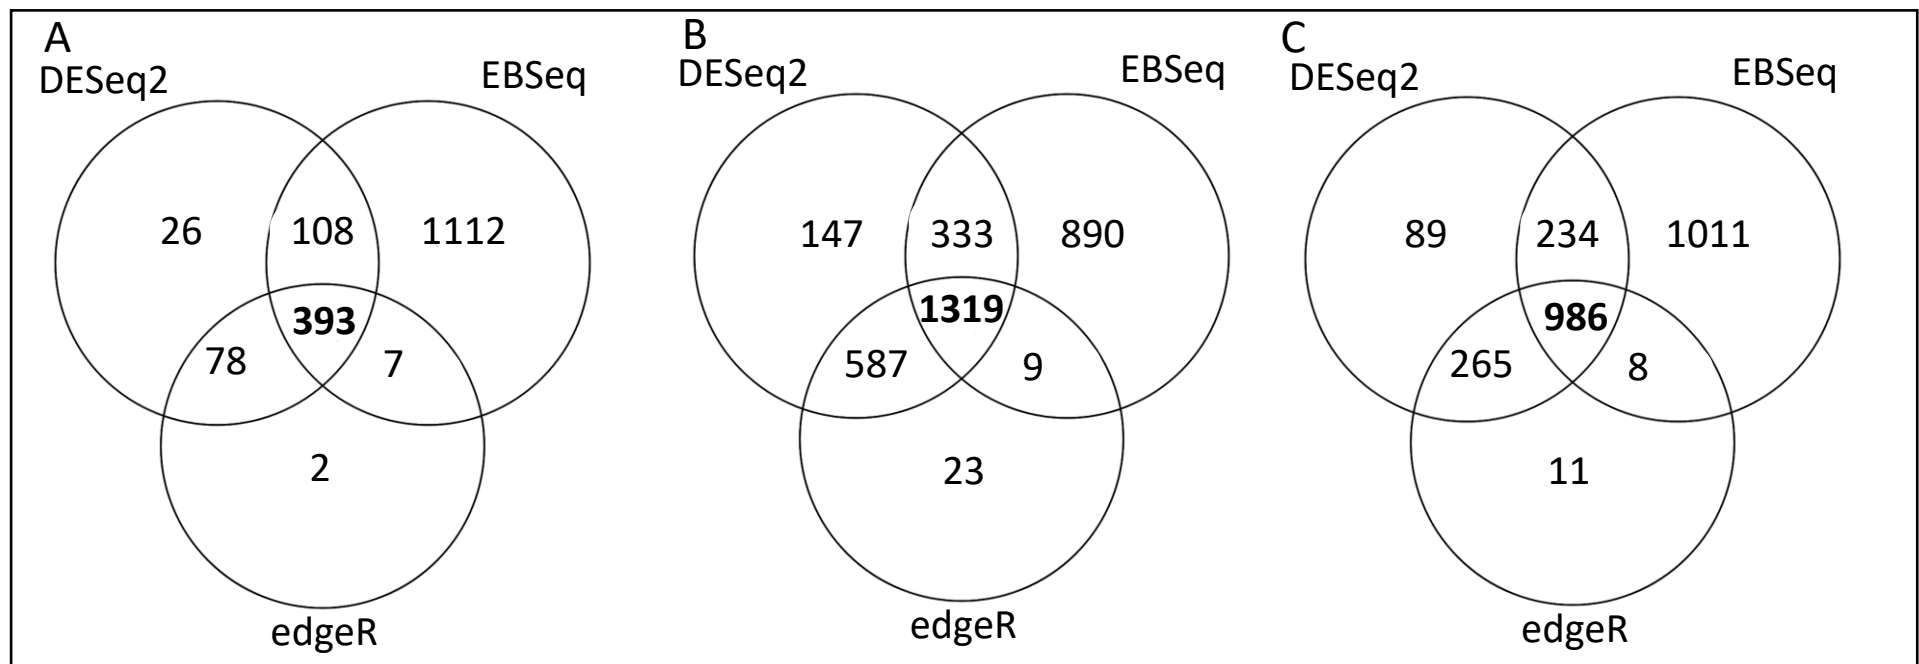

**Figure S3.** Venn diagrams representing numbers of DEGs identified with three different algorithms for the comparison between the wild *D. carota* subsp. *commutatus* and the cultivated *D. carota* subsp. *sativus* 2874B in time point T1– wcDEG.1 (A), T2 – wcDEG.2 (B), and T3 – wcDEG.3 (C). Only DEGs confirmed by all three methods were used for subsequent analyses.
