# Supplementary material for: Comparative Transcriptomics of Root Development in Wild and Cultivated Carrots
Source: Genes (Basel). 2018 Aug 24;9(9):431. doi: 10.3390/genes9090431 (PMC6162504; doi:10.3390/genes9090431)
Supplement: Supplementary file 1 [file genes-09-00431-s001.zip › Supplementary tables S1-S21.xlsx]

## Sheet: Content
Suppl. Table	Dataset description	Dataset name
S1	Samples and conditions	Samples list
S2	Reads mapping stats	Mapping
S3	Novel transcripts	Novel transcripts
S4	DEGs in the wild carrot - T1 vs. T2	w.1.2
S5	DEGs in the wild carrot - T1 vs. T3	w.1.3
S6	DEGs in the wild carrot - T2 vs. T3	w.2.3
S7	DEGs in the cultivated carrot - T1 vs. T2	c.1.2
S8	DEGs in the cultivated carrot - T1 vs. T3	c.1.3
S9	DEGs in the cultivated carrot - T2 vs. T3	c.2.3
S10	DEGs common in the cultivated and the wild carrot - Different Expression Patterns	c_w.DEP
S11	DEGs common in the cultivated and the wild carrot - T1 vs. T2	c_w.1.2
S12	DEGs common in the cultivated and the wild carrot - T1 vs. T3	c_w.1.3
S13	DEGs common in the cultivated and the wild carrot - T2 vs. T3	c_w.2.3
S14	DEGs specific to the cultivated carrot - T1 vs. T2	cDEG.1.2
S15	DEGs specific to the cultivated carrot - T1 vs. T3	cDEG.1.3
S16	DEGs specific to the cultivated carrot - T2 vs. T3	cDEG.2.3
S17	DEGs specific to the wild carrot - T1 vs. T2	wDEG.1.2
S18	DEGs specific to the wild carrot - T1 vs. T3	wDEG.1.3
S19	DEGs specific to the wild carrot - T2 vs. T3	wDEG.2.3
S20	Enrichment results	Enrichment
S21	Association results	Association

## Sheet: Sample list - S1
Time point	Days after sowing	Organ	Type	Sample Name
T1	55	plantlet	Cultivated	T1-2874B-1
				T1-2874B-2
				T1-2874B-3
			Wild	T1-Dc615-1
				T1-Dc615-2
				T1-Dc615-3
T2	110	root	Cultivated	T1-2874B-3
				T2-2874B-4
				T2-2874B-5
			Wild	T2-Dc615-5
				T2-Dc615-6
				T2-Dc615-7
T3	165		Cultivated	T3-2874B-8
				T3-2874B-9
				T3-2874B-10
			Wild	T3-Dc615-8
				T3-Dc615-9
				T3-Dc615-10

## Sheet: Mapping - S2
Sample	All read pairs	QC filtering	rRNA fraction	Mapping
T1-2874B-1	16531903	0.9231	0.4484	0.9665
T1-2874B-2	15571221	0.9183	0.1158	0.9462
T1-2874B-3	10921906	0.915	0.1161	0.9557
T2-2874B-4	25005233	0.9287	0.6206	0.8735
T2-2874B-5	19513967	0.9188	0.202	0.9572
T2-2874B-6	17260881	0.9311	0.5751	0.9405
T3-2874B-8	14402783	0.9101	0.0554	0.9462
T3-2874B-9	22164812	0.9252	0.2141	0.9409
T3-2874B-10	18647435	0.9257	0.4365	0.9108
T1-Dc615-1	13070533	0.9139	0.1473	0.9588
T1-Dc615-2	15018172	0.9055	0.3996	0.9766
T1-Dc615-3	22992042	0.9125	0.0856	0.9574
T2-Dc615-5	22713276	0.9119	0.0494	0.9574
T2-Dc615-6	23269868	0.9195	0.0393	0.9597
T2-Dc615-7	20123324	0.911	0.3112	0.9518
T3-Dc615-8	14678786	0.9301	0.4722	0.7189
T3-Dc615-9	21009903	0.9096	0.2864	0.8957
T3-Dc615-10	19871896	0.9282	0.3025	0.93

## Sheet: Novel transcripts - S3
Gene ID*	Novel transcript sequence 5'->3'
LOC108204032	CTTTTGGTAATAAATTATGACCTTGGGTCATTGCCATGGCTTATATAGGAATTAGGAACACAAAAAACCTTTATGTATATCAGTACGTGTGTGCTTATATCTGCTCACTCTTGAATAACCACTGCTGTGTGGTTTTGTTCACCTTATTTGTAGCCTTACTATTAGATTTTCGATATATTAAATAGATTAACAGCCTGTGTCACATCCCTTGAGCAATGAAGTAGAAATTAAAATTTGTCAAGAGGTAATTACTAATCTTAATGTTCTTACGATAACTCACTCTCAATACTTTGTTGTCAATTGTCATGTTGCTGTGTATCTCAAATTCCCAGGCATATGATATGTGTTATAGGGGCACTTGCTTGTGATAAAAAACTTCGATTTTTTCAAGCTGAACCA…
LOC108204039	GACGCCGCTGGAATTATTTTGCTGAGGATTTTTTCCCCACGGTATGTTTCTAGCCTGCTAAGGAAATTTTTTCCAAGGTATGCTTCTCGCCTGATTTGGCGATTTGATTATTGTAAAGTAACTAAGCCGTGTCTATATGAATGGAGCTTTATATGTGTTGGCAGCTATCACCTGTTCGACAAATTGCCTAAGAAAAGAGATCTTGCACCGCAAAAATGTTTCTGAGGAGATGCTATTCAACGTTTTCTTCTCGTCCATTGCGCGACTGCGTCGTTGCAAGCGGCCCTGCTGGTTTTTACACTGCCAAAAAGGTACAATGCTGATTTACGATTTTATTTTCACTTTTCGTACTTGAAATCAGTGCTAATTACTTCCACAAAAAACAAATATTGGTGTGAA…
LOC108204039	GACGCCGCTGGAATTATTTTGCTGAGGATTTTTTCCCCACGGTATGTTTCTAGCCTGCTAAGGAAATTTTTTCCAAGGTATGCTTCTCGCCTGATTTGGCGATTTGATTATTGTAAAGTAACTAAGCCGTGTCTATATGAATGGAGCTTTATATGTGTTGGCAGCTATCACCTGTTCGACAAATTGCCTAAGAAAAGAGATCTTGCACCGCAAAAATGTTTCTGAGGAGATGCTATTCAACGTTTTCTTCTCGTCCATTGCGCGACTGCGTCGTTGCAAGCGGCCCTGCTGGTTTTTACACTGCCAAAAAGTCTTGAAAGGCCTGTAGACTGCCGTGTGGGGGTCATGATTCTTGAAAGCAACTGACAGGGGTTCTACAGAAACTCACATACACAGATG…
LOC108204039	GACGCCGCTGGAATTATTTTGCTGAGGATTTTTTCCCCACGGTATGTTTCTAGCCTGCTAAGGAAATTTTTTCCAAGGTATGCTTCTCGCCTGATTTGGCGATTTGATTATTGTAAAGTAACTAAGCCGTGTCTATATGAATGGAGCTTTATATGTGTTGGCAGCTATCACCTGTTCGACAAATTGCCTAAGAAAAGAGATCTTGCACCGCAAAAATGTTTCTGAGGAGATGCTATTCAACGTTTTCTTCTCGTCCATTGCGCGACTGCGTCGTTGCAAGCGGCCCTGCTGGTTTTTACACTGCCAAAAAGGGGTTCTACAGAAACTCACATACACAGATGTATGCACATATATCTGAACTGGAATGTTTACGGGCCAAAAAGGTACCATTTTAATATT…
LOC108204039	GACGCCGCTGGAATTATTTTGCTGAGGATTTTTTCCCCACGGTATGTTTCTAGCCTGCTAAGGAAATTTTTTCCAAGGTATGCTTCTCGCCTGATTTGGCGATTTGATTATTGTAAAGTAACTAAGCCGTGTCTATATGAATGGAGCTTTATATGTGTTGGCAGCTATCACCTGTTCGACAAATTGCCTAAGAAAAGAGATCTTGCACCGCAAAAATGTTTCTGAGGAGATGCTATTCAACGTTTTCTTCTCGTCCATTGCGCGACTGCGTCGTTGCAAGCGGCCCTGCTGGTTTTTACACTGCCAAAAAGTCTTGAAAGGCCTGTAGACTGCCGTGTGGGGGTCATGATTCTTGAAAGCAACTGACAGGGGTTCTACAGAAACTCACATACACAGATG…
LOC108204039	GACGCCGCTGGAATTATTTTGCTGAGGATTTTTTCCCCACGGTATGTTTCTAGCCTGCTAAGGAAATTTTTTCCAAGGTATGCTTCTCGCCTGATTTGGCGATTTGATTATTGTAAAGTAACTAAGCCGTGTCTATATGAATGGAGCTTTATATGTGTTGGCAGCTATCACCTGTTCGACAAATTGCCTAAGAAAAGAGATCTTGCACCGCAAAAATGTTTCTGAGGAGATGCTATTCAACGTTTTCTTCTCGTCCATTGCGCGACTGCGTCGTTGCAAGCGGCCCTGCTGGTTTTTACACTGCCAAAAAGTCTTGAAAGGCCTGTAGACTGCCGTGTGGGGGTCATGATTCTTGAAAGCAACTGACAGGGGTTCTACAGAAACTCACATACACAGATG…
LOC108204039	GACGCCGCTGGAATTATTTTGCTGAGGATTTTTTCCCCACGGTATGTTTCTAGCCTGCTAAGGAAATTTTTTCCAAGGTATGCTTCTCGCCTGATTTGGCGATTTGATTATTGTAAAGTAACTAAGCCGTGTCTATATGAATGGAGCTTTATATGTGTTGGCAGCTATCACCTGTTCGACAAATTGCCTAAGAAAAGAGATCTTGCACCGCAAAAATGTTTCTGAGGAGATGCTATTCAACGTTTTCTTCTCGTCCATTGCGCGACTGCGTCGTTGCAAGCGGCCCTGCTGGTTTTTACACTGCCAAAAAGTCTTGAAAGGCCTGTAGACTGCCGTGTGGGGGTCATGATTCTTGAAAGCAACTGACAGGGGTTCTACAGAAACTCACATACACAGATG…
LOC108204039	GACGCCGCTGGAATTATTTTGCTGAGGATTTTTTCCCCACGGTATGTTTCTAGCCTGCTAAGGAAATTTTTTCCAAGGTATGCTTCTCGCCTGATTTGGCGATTTGATTATTGTAAAGTAACTAAGCCGTGTCTATATGAATGGAGCTTTATATGTGTTGGCAGCTATCACCTGTTCGACAAATTGCCTAAGAAAAGAGATCTTGCACCGCAAAAATGTTTCTGAGGAGATGCTATTCAACGTTTTCTTCTCGTCCATTGCGCGACTGCGTCGTTGCAAGCGGCCCTGCTGGTTTTTACACTGCCAAAAAGTCTTGAAAGGCCTGTAGACTGCCGTGTGGGGGTCATGATTCTTGAAAGCAACTGACAGGGGTTCTACAGAAACTCACATACACAGATG…
LOC108204039	GACGCCGCTGGAATTATTTTGCTGAGGATTTTTTCCCCACGGTATGTTTCTAGCCTGCTAAGGAAATTTTTTCCAAGGTATGCTTCTCGCCTGATTTGGCGATTTGATTATTGTAAAGTAACTAAGCCGTGTCTATATGAATGGAGCTTTATATGTGTTGGCAGCTATCACCTGTTCGACAAATTGCCTAAGAAAAGAGATCTTGCACCGCAAAAATGTTTCTGAGGAGATGCTATTCAACGTTTTCTTCTCGTCCATTGCGCGACTGCGTCGTTGCAAGCGGCCCTGCTGGTTTTTACACTGCCAAAAAGGGGTTCTACAGAAACTCACATACACAGATGTATGCACATATATCTGAACTGGAATGTTTACGGGCCAAAAAGGTACCATTTTAATATT…
LOC108205331	CACAACTTACGCTTGTCACTATATATATGCATATCCAACCCCAACATTTCACAGTTCACATACAAGTCACGAGTCATATCTTATTATCCACAAAAAAATACAGATAAGAAAATTGATGATAAAATTGATGATGTCTCTACAGCAATCTCCAGCCTGCTCCTGGAATCTTTCCCCATCTTCAAACAAATTAAACCTCGAATCTCGCAGCTTCGTTTCTTTGAATACCCACCTACAAAATCCTGGAATTTCGATGAATAAATCATCCGGTTGGAGAAAATCAAGCAGCGTGGCAGCTATGAACAGCAGTGTATATGCTCCTCCGGCAGAAGAAGAAACGGGGAGTTTTTATGAGCTGCTGGGCATTTCAGAGAGTGGGACCCTGTCCGAAATCAAGAAAGC…
LOC108197665	CTCCGAGCCTGTTTCCTGACCCCGGCCTCTGGGATGTAGCGATCATATCTTTCACATTGCATGCTCAGCTCGTTACTTCCTCCACCCACATTCATCTTTCACGGCTTATTTAGGCGATCATCATATCTGCGCAGTTTATGTATCAGGACTTAGGAGTGGAGCAGGTGTCTGTGATCTAAATTCACGGTTCAGGGATGATAATTGGAGGATATGCCCTTCGGTGGTGAGCGCCTTATTTGCCTTCTGTGGAGGTTTGACAATGGAGTTTGTGTAATGTAGTGCGTGAAAACTCAACTGGCTTGTTTCAGGAGATTAAGTGAGTATGATGTTAAGACTATCGGGTGTGTATCCGTGACATGTTGGACAATCTGGTAGGCTCGAAAAGGAATTGGTATGGAG…
LOC108201860	CGTTCCTATGATTTGAGTATATAAACAGATAAAATACAGACAACAATACTGGTTTTAGTCTCTACAGCAAAATCATAAAAAACACACACATTTCTACTGCTGTAGCCTGTAGGGAGGCTCTCTCTTTCTTTCCTCATTCGTTCAAGATCCCCCCGTAAACCCTAAATCCATCTTTGAGAGAGAGAGAGTGCAGCTGCTTGTTTGCTTAATTCTCATTTCAATTCTCCGATCCAGATATCATTCACAGATGGCGGCTGAGGCACCTGCTGTCACCCCTCAAATTGTTGGGCATGCATTTGTTCAACAGTATTACCTTATACTTCATCAATCCCCTGCGCTTGTACATCGTTTTTATAAGGATATCAGCAAACTTGGTCGTCCTGAAGATGATGGTACCAC…
LOC108201860	CTTGGTTCACATTTTCAGCAGAATTTAAAATAGAGGCCGACACATCAGTAGTTGAGCTTGCAGGCGGAGCTCTTCGTCAACAACCTCGGCAATTGGCTCTTCGTCAACAACCTCAGCTACTGGCTCTTCGTCAACCATCTCAGCTACAGCCTCTTCCTCTTTTTCAAATTTTATTTCTCCATTCTCAGATACATTGTGTAATGATTCCTCATTAGGCTCCGATGCCAAAGCATCATTTCGCTCAGTCATGTGATCCTCCTGCACAGGATTCGCT
LOC108204137	TCAATTTTTTAATACTTTTTTCCATTTATTAAAATTGTTCTAAAAAGGCAATCTAACTTCTATTTCTGTTGTACGTATTCAGTATAACTTATTTCTATAGATGATATTGTCAATTCCAAGGAATAGTTACATATGCCTTGATGCTCACACACACACACACACACACACACGAGAGTTAGGTTCTATGGAGTCCACATTTAAGCTAGAGTTTCGGAGTACCGTTCATAATTTTTTTATTTAATCATATAAAATATCTTTGATTATCAAAATATATATATAATTTGTCATTTATAGGTAATCTTAAACAACATTATCAATTAAATGTTAACATCCTTTAATTGTAATAAGCATTAAGATCATTGTTCTGCTTATTAATTATTATATAGAACATAGTGTTCT…
LOC108204137	TAAACAAAAATGGCGCCACAATAAAAATGGCCGAAAATGGGCAAGTAATTGCAGGCAGGCAAAACAGGCCTCTCCCTCTTCTTCATTGTCTGCATATCCAGCCCGCTATTACTCTCAACCAAGAATTTGAAATTAATTTCTGTAGTTTTGAAGCACAGATACAAAATTGAGAACAAGCAAGAAGACGAAGCAAAAAATACTCTATACTCACTTGAATTAGTTTTGGGTAAATTAACACTTGTTTATATATTTAATTATAGATAGAGAGGCCTAGCTACAAATCGGTATCGGAAAATTCAAAATCCAGGAACCTGATTGATTTTAAACAAATGGGACTGAATAACATTTAGGAGTTAGGAAAAAGAATGAGTGGATATACTTCAGGTTCCGGTCACTTAG…
LOC108205082	TGATAGTGATATTACAATTTGTAAAGAAAAAGGAAATATAACAATAATAAAAATATCCCCACAAGCTCTGCAATTCGCCGTGTATTATTCTCTTTTGCTTGCTCGATAAAAGTGAAAATCTGCTTGATTATTACTATCTGTATGTATGTACTTGCTTTTATATACACACAAATACACGAAGAGGAGGCTTCGTAACCAGAAAGTCACACCATCTACGCTTTCACGATAATTATGCTTCAACTAGCTTGTTGTTGTTCGAGAGAGATTGGGAGAGATTGAGAGAGAGAAAGAGAATCTGTACTATTCTCATCAACTGGAGAGAGAGAGAGAGTACTATTCCGAGAAAGAGTAAATCTATACTATTAGTATCATTAACTGTGTCTACTGCTGAAAGACGAA…
LOC108205468	CAATAAGTTGTGATCATATGCAGACTTCTATGTAAGTTTCACAAACTAAATCCAGCGCTATGATGTAGAGTATTAACTATTTCCTTGTGAATGATGGTATGAGTTGAGATTGGTTTGTAATCTTTCTGGTTTGATGTAGTCTGTTTATCCAATTATTCTTTACAGAATGGGAATACTGATACACCAGTACACCACCTTAAGCTAGATAACCAAATGGAAGAATCAAGGTTGATATACTTTTAAATTCGTGATGAAACGCCTTGTGTGATTGATATAACTATGCGGACATTTGTATTAGACAGAGTGTACCTTGAGTCTTGAGATACATAATTAACAGCCTGTTTCGTTATTTTTCCTTCCGTACAAAAATAACTTTTCACATATTGTTACCACAGTTCC…
LOC108215819	GCCTAGTCATCTCAGACTATCATTTTACTTTGCTCATTCTAGAATGTTGCGATTAAAAATCACTAGAAAATGATTTCATCCGCATATTATAAGGCATGGACTGTAAGCAGAATAATTGATATTTAGACAGTGGCACAGTAGGTAAGGATTATTGATTACCTGCCAAACGAGCATCCCATGCACCCTCTCTTATACAAAAATCAAAGATATTGCTTTCATTAGCAAGTCTCCTTTTAATAACTAATCACATTCTAACATTTTTGTTCTAAATCAAACTTCACTTTCAGATTCAACAACACAAGCATTTCAACTAAAGATGTCGAAAGAAAATAAAGATGATTTCACAAGGGTCCTGCAGGTAAACGGTGGCACGGTTCTTGGGATGGTTCTGAAAGCGGC…
LOC108202467	GGCAAAAATGGATATTCTTATGGTCATATAAAATTTGATGAAAATGGAAAAAATTGTCTGTAACATTATTGCTCTGTTAGCAAGGTAGCTATTTCAACAGATAACATAAAACTGAAAAGGTTAAAATTATATGAACTTCTAAAATTTTTTTGTTAAATATAACATGATTCAGTTAAAAAATCATAAAAAAAACTCCCTGATCGGTTACTTAATAATTTGTTCTCCGGCAGCTTTTCTCTGACCCCTTACAGTAACCTGTTAATTTAATAATTTATAATTTTTTGTGGGGAAAAGTTTGTAATTATAGTTTTTACAAATTCACAAAGAAAAGGGTCAGAGCACTTTAAGGTTACCAAGTACTAGGACTACTGGTCTCGTGTCTGGTTAGAAGAAGCTTCA…
LOC108202497	ATTCCATGTGTTTGTCTAACAGTTTCGATTCTTAAACTTGAAGAGTAGTGGATCTATTTGAATACATCAAAAGATTTGTGAATATGGCTGATGACCGGATCCTAGAGCTATCGCCGGAAACTGCAGGGAGGTACCTTGAAACAAGTGCACCACAGCTGGTTGATTGGGGAGAGATTCAACACCTTGATGACTCTGTGTTTGAGCCTCAGCAGGATGATCTGTTCCTCAACCATCTTCACTTCCTCACTTTCGTTTCAGCTCCAACACCGACTCCAGTAGCTGATCTGTTGATATCAGCTGCAGCTCCAACACAGCAGGAAGAACAGTGTCTGATGAATATGACAAGGAATGAAGATATGGTGCTGCCTGCAGATGATAATAAGCAGCTTTCAACTCAAA…
LOC108205032	CTATAAATTACTTACTGGAATCTCCATTTGCATGTTCATTCTTCTCAGTTTCTCATGTTGTTTAGCAAAATACGATTAGTTATGCTTCACCTTATTGAGCAAACCTGAATCTCTTGTCGAAAAGGCTGTCATACCTTCATTAAAGTGTTCTTTAGTAATATCAACAAGCTAATTTGGGATACCTTTTCAGCACATCTTTTTATCTCCTTCCATTCAGCCAGCCAAACGAGAGTTGATCAGAATTTTTTTACCAGAACATGAAAGGTTTATGTTATTGCATGCTTCAGTGGCTACTTCAAGAGTACCATATAGGACTCGAGTTAAGCCTCTGAAAAATTCCATAGTACCTTCTCCATCTCCTTCTCCCTCATCTCAAGGTCCTATAGCTAGTCATAGAAC…
LOC108205032	GCCAACCTTTCTCTATCTCTCCATCTATACACACACTTTCTGTATCTCTACATCACTTCTTGCTGCCTGTAGCAGACCTACTAGCAAAATCTTGAGACCCCATCACTTCATTTCCAGCTCCAAGATCTTGCAATGTGTTTATTTTTCTAAAAAAATAATTAAAAAAGATCTGATTTTTATGTTGTAATTTTGTTTAGAAAGTTTAGATCTTAACTCAACTTGATGGATCTGTAGAACCCTTCTGCATTGTTCCTTTTGAGAGAAGAACAAGATGTCAACTACTTTGATACTGCTGCTGTTCTTTTTTCACTTGCTATTTCTGCTTTCCACTAGTTTTGGGATACCTTTTCAGCACATCTTTTTATCTCCTTCCATTCAGCCAGCCAAACGAGAGTTGAT…
LOC108205032	GCCAACCTTTCTCTATCTCTCCATCTATACACACACTTTCTGTATCTCTACATCACTTCTTGCTGCCTGTAGCAGACCTACTAGCAAAATCTTGAGACCCCATCACTTCATTTCCAGCTCCAAGATCTTGCAATGTGTTTATTTTTCTAAAAAAATAATTAAAAAAGATCTGATTTTTATGTTGTAATTTTGTTTAGAAAGTTTAGATCTTAACTCAACTTGATGGATCTGTAGAACCCTTCTGCATTGTTCCTTTTGAGAGAAGAACAAGATGTCAACTACTTTGATACTGCTGCTGTTCTTTTTTCACTTGCTATTTCTGCTTTCCACTAGTTTTGGTAAATTATGTTTGTGTTTGTATATTCATTGTTTTTTGTTTTACTCTTTGTTTTGTTGTTA…
LOC108204844	ATACGTGTTTAACTCACTCACTAAAACTCACCTCCGAGTCATGACTCACCTACCCGTACCCTTTCACTACCTCTATCAGATTTTCCTCCTCTTCATAATCCCAAGTCTCCCCTCTTTACTTCACTAGGGTTTGCTCAAATATTTTTTATTTATTTATATTTAATTTCTTTTTTATCTTAACAGTACTCTCCGTTTCAAACTATGCTTCTAAATTCTCTTGTATTTATGTCTTTCTTTATGCAAACTATCAGATTGTTGTTGTAGATTGTTTTAAGTTTTTTCCAGTTGTTTTATGGTTGTAGATTACTTGAATCTTTTTAGATTTGCGTGTTTGCTTAAAGGGGACATGGGTTTTTTTGTTTATGCTAAAATTTAGATACCCTTTTGAGTATAGTTGAT…
LOC108197639	TTTAGGCCGCTTTTCATCTCTCTCCATGGAGGACCCCCAAGAGAAGCAGCTTGAGCCTTGAGCACATATTTATAAGTATGTCCTCCAGGAGTGCCAACAGCCTCGACAAAGGTACCCTCTACGATAATATCAATTTTGCTCCCTGTGTTTAATCTTAACTGCTGATGTTGCCGCGGTTGCAAAGCGCATGCACCTTAAGGTCTTGGGTCCGTTCATGATACCACCAAAGATTATGTGTATTAGATCGAGATTAGGCCCAGGCCCTAATGGAAATAATCTTCATGGCTACTTTAAGTTATGTATTTACGAGAATCTCATTGAAGTCTTCAGCTCTACTGAGGTGGTTGAGCAGATCATTGCTGGTTCTAATGAATGCAATGTCAAGATTGAGGTTACAGT…
LOC108207172	TGTAATGAGTGGTACTAGACTACTCTTGACTTGGCAAAGGCAAAAACACCAAAATGCTTAACTCCTCGTTCATAGGCTCCTCACTCCCTACCACCACTACTTTTTACTCGAAACCCACCAAAACCCACAAACACCACCCTACAATAACCTCTCTCAACCGCCCACCACCACCACAAAACCCTAACCCTAGCCCTAATTTCATAACCACAATCTCTAAATTCTTATGGGGCCCATCTCTTCCACCTCAACTCCTCATCTCCACCGTACGTTCCACTTGGTCCACGACATGGCAAATCATGATGTCCCAGCTCGCCCCGTCCGACCCATCTGGCAGTTATACCCGACCCACTTCCCAATTTCGCGCCAAACCTGGGAACCAATTTTCCCGCCAAAACTTCA…
LOC108204267	AAACCCCACCGACAAAAAATGTTGTATTTCAATTCTATGTTAAATACTCCATAGTCTCCATGTTATAATATGGATCTAATTTTTTTTTGAGAAATATAATATGGATCTAATTAATCTTACTAAAAATTATTGTCACTTTCCAATTAATAAATTTACAATGATTATTACATAAACAAAATATAATAAAGATGCACCAGAATATACACTGATATAAGTAGAACCCTATTAAAAATCACAGTGATTATAGAGACATACACTATACTTACAACTTTGTATTCAATACTCATTGCATCTTCTTCTCCAGGGAGTCTCCGGAGGTTTTGTTAGAGTTGATGATGATCTTGTGATCAAGATTGGATTTTTATTGAAAATTTGTTAGTGTTGATGATGATTTTGTGA…
LOC108193565	AAATCGTCCTTTTCTTCTTTGTATTCGTTGTAACTTTCTCGCTGCTTCTCGAACTCTGTCTATCGCCGTCATCGCCCCATTCACAATCTCCACAGGAACAAAGTTCCCATTTTTCCGGCATCTCCACGTCATCTCTCCGGCGCTGATGTCTCAACCACCGGTCGGTCTAAACGACTGCTTAAAGCTCCTAAAAGGCGAGCGCGACGAGCAAAAACTCGCCGGCCTTCTCCTCGTCACCAAATTCATCAATAACGATGACGTCAGCTCGATATCCGTTATCTACGACGCCGTCGGCGATGTGTTCCTCACGCGCCTGCTCAACACAGGGCTCGGAAAAGGTAAATTACTCAAATCCGGACTTGATAATCGAGACGCTTACTTACAACTTGCTGTTACTCT…
LOC108193572	GTAAGAGGTGGGCAAGAGGCCAAGTCGTTTCCCTTGACCCTAGACTTTTAAGCAGCTCCTCACGCTGTATCAATTACAATCTCAAGTCTCCGTCCATGAATCCAATCTCGCTCAATTATATTTAGTTGAAGTTTCAAGCAAGTCAAGGCTTTGTGGAGAAAGATTAAAGCTTTTTGGAGATAGATCAAAGTTTATAAGAACAACAAAAAGATCAAAGCTTCCGAGAAGAAGAAAAATATCGGATCTTTTAAGAGAAGAAGAAAAAGATCAAGCTCCCCAGAAAAGGGAAACAAAGTCAGAGCTTCCAGGAAAAGGAAAACGATCAAGTTGTGTTCGTATTAAATCATGCTGAATTGTATTTAAGAACTAGAAACATGTGAGGAGAGTTCACTGAAAGAA…
LOC108193572	GTAAGAGGTGGGCAAGAGGCCAAGTCGTTTCCCTTGACCCTAGACTTTTAAGCAGCTCCTCACGCTGTATCAATTACAATCTCAAGTCTCCGTCCATGAATCCAATCTCGCTCAATTATATTTAGTTGAAGTTTCAAGCAAGTCAAGGCTTTGTGGAGAAAGATTAAAGCTTTTTGGAGATAGATCAAAGTTTATAAGAACAACAAAAAGATCAAAGCTTCCGAGAAGAAGAAAAATATCGGATCTTTTAAGAGAGAGTTCACTGAAAGAATTCCAGGATTTCTGAGAGGAGATTTGCGCCCAATCTGCTATGATGGTTGGGACTGCACAGGCTGACAAAACGAGGCAAAGTGGTTCCAATCCAAACATGCAATCTATGCTCAATCATAATCTGTTGAT…
LOC108193555	AAAAGAGAGATCAGCGAGAGAGAGATTTTTGGTGGCACCTTCTTCCTCATCAGCGAGAGATAGAGCTCCTGCTTGTGCAAGAAAGTGAGAGGATATGGAGCCAGGTTGTAGCTTTATTACGCAAAGCTTTCGGTTGCTTGGTGATTGTCTAACTCGTGGAGCTATACCTAGTGATGTTGTAGAAAAAGAAGATTATTGTGATGATTATGATTATTGGAGTAATCTTCCCGCTGATATTCTTGAGCTTATCGTGGGGAAGTTTAGTTATCTCCGTGACTATTACAGATTCATTGCTGTCTGCAGATCATGGAGGGATTCACTTAGTCATTTCAAGAAGCCCTGTCTTCCCCTCACCGAATATCCGTTCCTTCTTCTTGCGGAAGATGTTGCTCCAGGAGC…
LOC108193555	ATCCTTTGCTTTCTCGCCATTAAGACTAATCAGCTTAATGAGGCAACTTACAACAGCTTTTTGCGCTCCAGAAAAAGCAACAACACGACATCCATCAACTTCCATTGTTATCTGACACAACATAGGAAGCAAAAAACAGATAGACTGGAAAGGACTTTGCTCGTCTTCCCCCTCAATCGAAAGCATAAAATCCAAAAGTGATGTTACCTTATCCTTGCATGCATCAGGGGTTTCTGCAAGATAACTCCCAATAACCCGCACTGAAGCAAGGAGATCATCTCCTTTCCTTTGTCCATGAACCTTCGCATCTTGTATATACTCAAGGATGACACCAGTCGTCTCATTAAGCCCATTTATAATCTTAATAAAAGTACTTTCGCTAATAACACCACCTTCATC…
LOC108208074	AAATCGTCCTTTTCTTCTTTGTATTCGTTGTAACTTTCTCGCTGCTTCTCGAACTCTGTCTATCGCCGTCATCGCCCCATTCACAATCTCCACAGGAACAAAGTTCCCATTTTTCCGGCATCTCCACGTCATCTCTCCGGCGCTGATGTCTCAACCACCGGTCGGTCTAAACGACTGCTTAAAGCTCCTAAAAGGCGAGCGCGACGAGCAAAAACTCGCCGGCCTTCTCCTCGTCACCAAATTCATCAATAACGATGACGTCAGCTCGATATCCGTTATCTACGACGCCGTCGGCGATGTGTTCCTCACGCGCCTGCTCAACACAGGGCTCGGAAAAGGTAAATTACTCAAATCCGGACTTGATAATCGAGACGCTTACTTACAACTTGCTGTTACTCT…
LOC108214437	CAACCCTTTTTAACACACAAAATAAAAAATCCAACGGAGCCAACAATTCAACCAAACCCTACCATATTCATACGCTCCCTCCACATTCATCCCTTTAAAATGATCACAATTTCTCAGTTCTAACCCATCATTATATTACCATAATCAAACACTAAATACCCATTAAATTCTAATTCAAGAAAATCGTAATATTAGTACTATTTTTTATCAAATGGGGGGCTGCTTTCTTGGGTGGTTCTTGAGTTCTAAGCGTCGGAAGCGGAGCAATTCCGGGAGCCCTCGTCGGAAAATAGATGGAGGTAATGTTACTAGTGGTGATCAAGTAGTGCGTGCCCCCGGAAAGGGGACTAATTTAGTTGCAGAATCGAGTGAGAAGTGTATGGAGAGTCAATTGAGCTT…
LOC108201032	AATACCCATTTTGTGCATTTTCAGTGAGAAAGACAGCTTAAAAAATTTGACAAAGGACCCGTTTTCTTCTTCTCCATTCCGTTGCCTCAGTCTCCTCATCTGCGCACCAAGATGGAAGTAAACACCGAAAGATATGGTGAAATTTACGGTGTTGACATATCCGCAATAAAAGAAGCACAAGTCCGCATCAGTCCATTTATACACACTACTCCAGTCCTATCATCGGAAACTCTGAATTCTACTGCTGGAAGAAAACTTTACTTTAAATGTGAATGTTTTCAGAAAGGTGGAGCTTTTAAATTTAGAGGTGCCTCCAATGCTGTCCTTTCGCTCGATAATGACCAGGCAGCTAAAGGGGTTGTAACCCATAGCAGTGGAAACCATGCAGCTGCACTTTCT…
LOC108205071	ACCCACAGAAGCACATTTATTAGGTGCATTCGAGACTCCCATAACAGTCAAAACAGAAACATACAAGAACAAGAAAGTGGCTATAAATTCTGCAATGCCAGCCCTATAAAAAGACCATGAGACTAGTTCACCATGCTCATACAGAGGTGCTGGTGGTGGCTCCACGTAGTCTCGATCGTGCATTGCAGAAGCAGATGTTCCAAGGGGAATCCTCTCAGGGTACTTGTTGGTTCCAACTTTGTCATCCTCTTCTTCAATCCCCATTGATGCTTTATTTTAGCAAACTTTGTTAAGGGATAAGAAGTGCTGTGAGTTGGTGCTTAAGGTGAGTGTTTTATAGGTGAAAATTTGAGCAAAATGCAGAACACAAATTTATGCAGATTAATGTAAATTATTGGT…
LOC108204935	CTTATCGTGTAGCTGCTTTCAGAACCAAAAAGATGGGCCAACCCTCTAATCTCCATCACACATTTGAGTTGTTTACATGCTTACACCTCTCCCATGGAATTTATGCAGATTATTTATGCAGAAACATATATAGAAAAAGATAAATGTTGACATTTTTTTGTTATTGCATAAAATCTTTATGTTTTAGAGACTAGAATTATGTTGTCATCTCACTCATTTCTTCAAAATTCTCCATTTTTATCAACTACAAGACTTCTTGAATCAAAAACTAGGCCTTTTTTATCATATAATTTCAGACCCTCCAGTTTCACAATATGTAGTAGTAGTGTTCAGAGCCAGAAACAAGATGTAGTCATTGTTGGAGCTGGAATTGCAGGCCTGGCTACTGCTGTCTCGCTA…
LOC108204731	CACGCATATAAGTGGCTTTTTATATAAAAAGCTCATTTCACAAATATGTTAGGACTTAATTGTGAAATTGGTTTTGATTATAAGGTTGATCACAATGCAGTAAGGTTCACATAATCTGTAGATAATGAAGACTACATACACAAATTTTAAACCAGGAACACTGCTCCTCCCAGTAATGCTACCATGGCCAGGCTACTAGTTCCATGCTTGAAACCCGCGAAGCCTTGGCTAGACGAGGAAGGGGTGTAGCGCGGGATTCCACTGGTGGAGCTACCTCTCGATCCCCTCAGGGACATGGAAGGTGCTGGTGCTGGTTCTGAAACCAGGGGACCAGGGCCCTTGGCCGGAGAAGTCATTGTGCTGGAGTGCAACACTGCCGGAGCTTGGCCAGAGGATAAG…
LOC108204731	CACGCATATAAGTGGCTTTTTATATAAAAAGCTCATTTCACAAATATGTTAGGACTTAATTGTGAAATTGGTTTTGATTATAAGGTTGATCACAATGCAGTAAGGTTCACATAATCTGTAGATAATGAAGACTACATACACAAATTTTAAACCAGGAACACTGCTCCTCCCAGTAATGCTACCATGGCCAGGCTACTAGTTCCATGCTTGAAACCCGCGAAGCCTTGGCTAGACGAGGAAGGGGTGTAGCGCGGGATTCCACTGGTGGAGCTACCTCTCGATCCCCTCAGGGACATGGAAGGTGCTGGTGCTGGTTCTGAAACCAGGGGACCAGGGCCCTTGGCCGGAGAAGTCATTGTGCTGGAGTGCAACACTGCCGGAGCTTGGCCAGAGGATAAG…
LOC108205445	GGAGGTAATACAAATCAGAAGAATACCAAATTGAAAAATTTAGTTGTACTTCTGGTTTCGATGCCACGTTTCAAACCAAACCACCGACCGTCAAATCGTCAATGATCTTGAATTTGCCGTCCACACTTCGATCCCTCCCGTATCTAACAACTAACCCTTATGATCACACCACTTTGACTACCACTCGTTTGTATACTTTGTATCAACAACCACCCTTCTCTCTCTCCCTCCCTCCACCCTCTCTCTCTCTCCACGATCTGTGGCTGCGTGTAATCTGGACGGGAAAGTGCTAGTCTAGCTGTCGGCCACATCTCCTAACTTTAGTCGATGGGCTGCTCTCAGTCTTTGGTCAAAAAGCAGTTTCCCGGACATGAGGATCCAGTAGCTCTTGCTTCTCAA…
LOC108205498	GAGAGAGAGAGAGTTCACGAGAGAGAAAAGCTCTCTACTTTCTTCACCAATTTTAATCCACCAACAATTCTAGAGATATATTTATCTGTATCTATATATAGACGCTAAAACAATGGGATCGACGAAACAAAAGCAAAAGCACCGGAGCTCCGGCGCCGATCAATGCACGAAAAACGAGGCGAATGACTGGAAGGATGAAGTGATTAACGGTGGATCGTTAAGGCACGTGGATCTCAATAACGGATCCAACGGCTGGGCGTCGCCGCCGGGGGATCTGTTTAGTCTCCGGTCGAAGACGTATTTTGCGAAGAAGGTGAAGGCTCCGTCTGGTCCGTGGCTGTTGCAGCCGGCCGGCGTTGATTGGCTCCGATCCGCCGGGAAACTCGAGAATGTTTTGTC…
LOC108203379	TTAATAATATAATTTAAATGTTATACAGGTCTACTCTACGCTTATATATCGGTTGACACATCTCGGCTGCCCTAATTTTCTTGAGTTTTGCAAAAGCTGCTCTGCTCTCCTAGGGTTTCAGGTGATTGATTGATTTGATTCTAAAGATGTCTCGTGTTTATGTTGGAAATTTGGATCCACGAGTCACGGAGCGAGAGCTTGAGGATGAGTTTCGCGCGTTTGGCGTTATTCGAAGTGTTTGGGTTGCAAGAAGACCTCCAGGCTATGCTTTTATCGACTTTGATGATCAGAGAGACGCGAAAGATGCTATTCGTGAAATTGATGGTAAAAATGGCTGGAGAGTTGAGCTTTCCCATAATTCTAGGGGTGGTTCTGGCGGGGGAGGCAGCAGAGGTGGTG…
LOC108200820	TAGAGTAGAAGCTAATCAAACCAAACCAAACACTCCCTACCTAAATTTCCAAGCCCTAATTTTCCCCTTGATCACATCCTCAATTCAAATCTCGTCGCACAAATCTCGTCTTTTCGGTTTGATCGTGTAATGTTGATTGAATTCGGTCATTTTTGACCCGTGAATCCCTAGTTTGGGGATCTTTTGGATGGACAAGAGTAATAGTAATAAGAGTCGTACCGATATGCTTGCAGCTGGGCGCAAGAAGCTTCAGCAATATCGTAAGAAAAAGGATGGTAAGGGGAGCAAAAAAGGTGGTAAATCTGAACAAGATGCAAAAACCGAGGCGGCAGCTAGTGCTGTTGATCTTGCTGATGCTAAACCACCAGTTTCTGGAGGTGAAGAATCTGGATCTGTTAA…
LOC108200820	TAGAGTAGAAGCTAATCAAACCAAACCAAACACTCCCTACCTAAATTTCCAAGCCCTAATTTTCCCCTTGATCACATCCTCAATTCAAATCTCGTCGCACAAATCTCGTCTTTTCGGTTTGATCGTGTAATGTTGATTGAATTCGGTCATTTTTGACCCGTGAATCCCTAGTTTGGGGATCTTTTGGATGGACAAGAGTAATAGTAATAAGAGTCGTACCGATATGCTTGCAGCTGGGCGCAAGAAGCTTCAGCAATATCGTAAGAAAAAGGATGGTAAGGGGAGCAAAAAAGGTGGTAAATCTGAACAAGATGCAAAAACCGAGGCGGCAGCTAGTGCTGTTGATCTTGCTGATGCTAAACCACCAGTTTCTGGAGGTGAAGAATCTGGATCTGTTAA…
LOC108205247	CTTTTCACTACTTCGATATTTAAAAGCAACTAGTCCACATTCTCTCCTGCCCATTCTCTCCTGGGTTGTTCTGTTCATCAACTTGTCTCTCTAAATCTCGCTCCACATGGATCCATCAACAGCACAAGGAGATGAAGGTGAAAACAACAACAGGGCTGCTCTTCAATCTCTCCCCAACTTTGTTGGCAAGCACAGGATGACGGCTGCTATTGCTCTCCTCAATCAACAGATTCAGTTTCTTCAGGAAGAAATTGATCAACTCGAGACTCTTGGTGGATCATCCGTTGTTTGCAAAGATCCTGTTTATGTCTACAGATTAGTTGCAAGTGTTGAATCCGTCTCTGACGCTCTGCTTCCTGTAACCAAAGGGCCAACAGAAGTTGCTTGGGAGAGATGGTT…
LOC108204663	AGTGATTGATCCAATAATTCCCTTCGGACCCGGTCACACGACTTCGTCGGTCCTGTTAAACTCTTCTACAAACTCTCACGCAATTTTCCTCAAGGCATGCGCATTGACGACGTTATTATTCTTGCACAAGTCAACTCTCACAAGTCTCGCTCCGCTCATTCTAAATTGCATCTCATTCTTCTCTCAGTAAACTAAACTCGCTTGACTGTCACAAATGTCTTGCGTTTTCGACACGATCGAATTATTTATTACTCCCTCCGTCCCGAATAATATCACGCTAATGTGATTCTCCCGTGCTTGTAAGTACAAAAAATTCTTTAACTGGCTTTGGTGCTTCCACTTACTAGTAAAGAACATCTAAGGTAAAAATGAAGCGGTGGTGGAAATCAATCGCGGTGG…
LOC108205209	GGACCAACTATATACAGATACAAAGATTTGAAGTCAGCTACCAAGAATTTTAGTGAAGAATGCAAAGTAGGAGAAGGCGGCTTTGGAGATGTATACAAGGGCATTATATCGAATGGAACCATAGTTGCAGTGAAGAAACTTGTTGTAAGGACAAGCAAAGAAATGGCGGCTTTTGAGAGTGAAGTCAGGCTTATAAGCGATGTTCATCATAGAAATATCGTCCGTCTGCTAGGATGCAGTGGCACAGGACCAGTTCAACTCCTCGTCTATGAATATATGGAGAACGGAAGCCTAGATACATTCTTATATGGTGATAAACGCGGAACTCTCAGCTGGAAAAAACGTGTTGGCATAATCCTCGGCATTGCTAGAGGTCTTGCCTATCTGCATGAACAATTT…
LOC108226486	TATAAACACAAATACACAATCTATGTCTCTCTCTCATTGGTTCATTCCTTAATAAAAAAAAAAGCCATTTTCATCAAAAGCCAAGTGAGCTGCTAGCTTTGGAGGCATACAAGCTTTCCCATTTCTCCTTTCAGTTACGAGAGGAGAATGGTGAATGCAAAATTATGCCAGTTGTTGCACACGTTAGTTTCCGCGCTGATATTGCTTAAAGTTGATGGCCTCTTTGTTAATATTACTTATCTACAGAGTGCTGTAGCAAAAGGAGCAGTATGCCTGGATGGTAGCCCACCAGCTTACCATATGGACAAGGGTTTCGGAACTGGAATTAACAATTGGCTGGTCCACATAGAGGGAGGAGGATGGTGCAACAATGTGACAACTTGCCTTGCTCGTAAGAAC…
LOC108212681	TTATTACATGTTGCAAAATTGCGTTTGAAAAGGGGAATTAGGGTTTATTCATCGAATAATATTGCACTGAACGAATCAATCCACAAAACTTAACAAGCTCCATCAAATTGAACTAGAAAGCTTCACTATATCACTGCAATCTCATCTCAGAATTGAGTAATGGGGTTGCCAAGATTTGCAAAGCCAAAGGCAACAAATGAGTCAAGTCCCAATCTTTATGTTGCCAATTGTGGACCTGCTGTTGGTCTCGATTTCGATACCATAAGATCAGTTTTTGGTAGTTATGGGGAAGTGAGTGGTGTTTATTCAGCTGATGAGAGTGGGACTCGTGTCATTGTGTCGTTTGTCGAGAATTCGGCTGCCAAAGCAGCGTTGGAGGCGTTGGATCGACGGCCTTGT…
LOC108205404	GCAATTTGTATATTTCAAATTTGAAGCTGTAAAGCACAACCTTTTTAGATTTTCTAAAGAATTGCTAGCCTTTCCATTGATGGGCCCACCTTTAATTTTCAACAACTCTGATCTCTAGTTACCAAACCTTCCAAATAAATGAAGAGATAAAGTGCATGATCCACATTTATTTTTATTGATGCAAGTACAAGTTTTAAATAAAGTTTAGGATTTTTTACAAAAATACGGTGCAATCATATGAAAATCAAATGTTCTCAACCAGTTTTGTAATCTCATTTGCAACTTCGACCATATTTTTAAGATAAGTTTGAAAACATGGGTATTTTTGCATTATGTGTACATTATAATCGCAGTCTCTTGTTAGGTATTTGGTGACTTTATATTGTTGGGAAGTGAAGT…
LOC108201942	ATTCACTTGTTCACAAATTAACAAACACTCTTCATTATCAACCAACACAACTCAAAACAAAAACCATGGACTCCATTTTCACCACTATCTTTTGCATACTCTTCCCCATCATTCTCTCAACAATCCTTCTCAAAACCCTCCTCAAGTTCCTCCCTTCCGGGTATCGAAAACTCCCCCTCCCTCCGGGCACCATGGGATGGCCTTATATTGGAGAAACCTTCCAACTCTACTCCCAAAACCCAAATGTCTTCTTTGCCTCCAAAGTCAAGAAATTTGGTTCAATATTCAAGACACACATACTAGGATGTCCTTGTGTGATGATTTCAAGCCCTGCAGCTGCGAAGCTTGTGCTGGTTACAAAATCGGAGCTTTTTAAACCAACATTTCCGGCCAGCAAAG…
LOC108209204	TCTTTGGCTCGATCAATCCGAGCCTACTTCCCAAACCTGCTAATTAACCCTCACACGTATTTTACCTGTATACAAAGCCGCAACACCTCTGCAACTTCACATACAGACACTCTAGCTTCTCCCCGATCCCCGTTCAGTGTCTATGTTCTCATCCACTCCTCCATCACTCTCATTCGATCAACCCCACCAAACAGTTACTATACCACGCAGATCCCGCACTCTTTTCTCATTTTCTTCATCTAGGACTTCTGTCGAATACATTGCCTACGATGCTCAAATTGATGAAATATGGGATTTTCCCCTTTCTGGTGACAAAGATATGTTCAGTTTTAATTCGAGATTTGGTTTGGCTGAGATGAACAAGCCGGGTTCGAGTTCGGGGTCTTTTCCGGTTGAAGT…
LOC108205443	AATGCACGAGTTGGTCTAGGGCATCGACGAAAACTCACCAGAAAATGCAAAGGATGAGAACAGCAATGTCCACTCACATACTCACTCTCACCCTCCTCAAAACCCCTATTTACAAACCCAAATCCCCCCCTTTCCTCCAAAACCCTAACCCTAACCACCCAATACGACGCCGCTTCAGCCTCTCCGCTTCCGCCGCAACACCGCCACCAATCACCGCCACTCCAAATGTCGAAATTGACCCCCGCTACTTATCGTGTTGTATGCCTGATAAGCGCCTCAACGTCGCCGTCCTCGTCAGCGGCGGCGTTGATAGCAGCGTGGCTCTGCGGCTTTTACACGCCGCCGGGCATTCGTGCACCGCGTTTTATCTGAAAATCTGGTTTCAGGAGGATTATGAGA…
LOC108205443	AATGCACGAGTTGGTCTAGGGCATCGACGAAAACTCACCAGAAAATGCAAAGGATGAGAACAGCAATGTCCACTCACATACTCACTCTCACCCTCCTCAAAACCCCTATTTACAAACCCAAATCCCCCCCTTTCCTCCAAAACCCTAACCCTAACCACCCAATACGACGCCGCTTCAGCCTCTCCGCTTCCGCCGCAACACCGCCACCAATCACCGCCACTCCAAATGTCGAAATTGACCCCCGCTACTTATCGTGTTGTATGCCTGATAAGCGCCTCAACGTCGCCGTCCTCGTCAGCGGCGGCGTTGATAGCAGCGTGGCTCTGCGGCTTTTACACGCCGCCGGGCATTCGTGCACCGCGTTTTATCTGAAAATCTGGTTTCAGGAGGATTATGAGA…
LOC108205443	AATGCACGAGTTGGTCTAGGGCATCGACGAAAACTCACCAGAAAATGCAAAGGATGAGAACAGCAATGTCCACTCACATACTCACTCTCACCCTCCTCAAAACCCCTATTTACAAACCCAAATCCCCCCCTTTCCTCCAAAACCCTAACCCTAACCACCCAATACGACGCCGCTTCAGCCTCTCCGCTTCCGCCGCAACACCGCCACCAATCACCGCCACTCCAAATGTCGAAATTGACCCCCGCTACTTATCGTGTTGTATGCCTGATAAGCGCCTCAACGTCGCCGTCCTCGTCAGCGGCGGCGTTGATAGCAGCGTGGCTCTGCGGCTTTTACACGCCGCCGGGCATTCGTGCACCGCGTTTTATCTGAAAATCTGGTTTCAGGAGGATTATGAGA…
LOC108202945	CAAGTACCCAACAGCGAAACAGACTTTAAAACAGCGCAGTGGAATCCAGCGAAGCAAACGTCTCGGTCAATAACAGTTGAGGATACACCGAAGATGGTTAAGTGCTGCTCCAACTGTAAGTGATAGTGCCAGTTTGGTCAATCCTACTATTGTACTGGACAGCCATTAGTAATGTGTTGGGGCATCATGCTAAGCCCCAGCTGAACTACAGAGATCGCCTTTGGTGCAGCTGAAAGAATTTAGTTTCTGTAAGCGGGTATGCATCCTGTTTGGACCATTAACAGGCTTTGTTGGTGTGTTTCGGCTGGATATTTTTTTCTGTTGGCTGTTTCACTTAGTTCAGCACAGTACGGAGGTATTCCCGCGGAATCACAATTTAATAATTCAGAAAGTCGATCA…
LOC108202945	AAAAAAATAAAATAATAGCCCTCAGATACCTCTGACAGGGAAAGAAGATGAGGGAAATGGTTATAACTGAGCCGTTCAACGGAATTGGCATTGTCATACGAAGAGCTGGATCCAACTAATTTGACTCTCACGGTACTCAGAGAAAGAGCAAGGAACACCACAACACTTGACAAAAGAAGTGCAAAGGACCATGGTCCTCCAAATGTATAAATGAGCTCCTCGAAAGGCTTANATGAATTGGGCATCCTGTACTTGTCAGATATACATCTATAGGGACATAATGATTGAGTTCCTCCCCCT
LOC108197576	ATTTTAATGACAAACTAAAAGGACTGAAAAACCAAACTATCTAGCCGGAGACGACAACGAGGCTACCGCTCTTCATCTTTTCCGGCGATCAGCAATGGCGTCATCTTCACCGCCGGTCACCGATAACTCCACTCCGAACCGCGCATCAGCTCCTATCACCACCGCCATCTCTCCAGCGATCAATTCGTCGCGAAATCTCCGCGGCCTCAACAAACCTAAGTGCATCAAGTGCGGAAATGTCGCGCGCTCCAGGTGCCCATATCAGTCATGTAAGAATTGCTGCGCAAAAGCTCAAAACCCGTGCCATATACATGTTTTGAAGGGCAGTACCAGCTTTCCAGACAAGGCACCAGCTACTGGCTCTCCTTCATCCGAACAGCAGCCTAATGATGTATCTCT…
LOC108213941	CTTCAATCTCACAAGTAACGTTGCCAAGAATCATAACATCACAAACTTAGACATTCAACAATTGACACTGTGGAATTCTCATAGGGTACCCAAACCAGTGAGCAAGAAGAATATGTTAGAAGTCCAGAAAAGGAGTTCAGGAGTTCAGGAGAGATGAGGCATTGGCTGCGTTTATTGACAAAATTAACAAAGCCCAGAATGAGAAAGATCTGAAACTCTGCATGGAGATGAAAGATCAGCTTGTTAATCCGCATACTGAGAGTACTCAAGCAGAATCCGAAAGTGTTGCAATTCGTATGGCGCTCCAGACTGATGATGTGGTCAAACCTCTGTTCGCTTAATTTTTTTTATTTTTTATTTTGAAAGGTACCCCAAAACTTGTTTGTTGTTTTCGGAAGG…
LOC108201929	AGCACCACCGTCTCTGCCGCCTCCTCTTCTTCATCTCTTTACTTCCATTTTTTTCTCATTTTTCTTGAATTTTTAGTCAAATCACCTCAATTTAAAAATACCCATTTCAAAAGATCACAAATCAACCCTGTTTTTCACCTCAAAGATCATTAATTTTAGTTGTTTTTTTTTTAATTTTTTGGTTTCTTGATTTCTTGATTTTTATGTTTTTGTATCTATATGTGTTTGTGTAGTTGATTTTAGTGCTTTGCGTGTGTAATTGTGTGTGTTTTGATAGAAAAGTTTTGATCTTTATTGGATATGTCCCAAAGGGATCTTTTGTATATAACTCCCAAGCCTTGTAGGCATCTTGTTGAGTATAAGATCAAGAATGGTATTACTGGTTATAATGTGATTCAA…
LOC108211498	TAAATATACATCTCCCTTTGTCTCTCTCTCTCTCTCTCTGGTAAACATAGATGGCAGAATTGAAATTTTTTTTTCATGAGCATCAGCTGATACTAAATGAAGCTGAGCCTGTTGTCGGTAAGGATGTAGAATGTGTTGGGTGCAAACAGCCAATCAACAAACTCATAGACGCATTTTATAGGTGCAACAAGTCCCTTATTGATAGCAGTCCAGCGAGTGATTGTGTTGGTTTCTATATGCATAAAACTTGTTCTGAGTTGCCCTCAACTTTTACACACCCTATGAACCCGAAAAAACCTCTAAGCCTCTTTGTGCTTCCATATAAAAAAGAATACTTTTATATTTGTCATGCTTGTGACAGCCACTCTCAGCACTTTATGTATGGTTCTGATTCTTCTG…
LOC108203972	TGATATGTTGCTTTTCCTTGTTACATTTACATTATAATCTCACACATTTTAGTTTGCTTATAAATACTCTACTTCACTTCCCTTCTTCTCATGCAATATTACTGTCAATTGCTTCAGTGTTGAGTTATAGCAGTTTCAATGGAGTTCAATCTCTTCCACTTCTTTGCACTTCTTTCTGTAGCATTTGTGGCAAGCCATGCAGCTCTGTCTTCTGAGGACTACTGGAGATCAGTTTTACCCAACACTCCCATGCCTAAGTCCATTAGTGAACTAATTCAGTCTCCTGAATTTTTGGATGACAAAAGCACCGCGGTGAATGTGGGAAAGGGCAACGTGAATGTCCACACAGGCAAGGGCGGAGGCACTAATGTAAACGTCGGAAAGGGCAACGTAGGTGTC…
LOC108203972	TGATATGTTGCTTTTCCTTGTTACATTTACATTATAATCTCACACATTTTAGTTTGCTTATAAATACTCTACTTCACTTCCCTTCTTCTCATGCAATATTACTGTCAATTGCTTCAGTGTTGAGTTATAGCAGTTTCAATGGAGTTCAATCTCTTCCACTTCTTTGCACTTCTTTCTGTAGCATTTGTGGCAAGCCATGCAGCTCTGTCTTCTGAGGACTACTGGAGATCAGTTTTACCCAACACTCCCATGCCTAAGTCCATTAGTGAACTAATTCAGTCTCCTGAATTTTTGGATGACAAAAGCACCGCGGTGAATGTGGGAAAGGGCAACGTGAATGTCCACACAGGCAAGGGCGGGGGCACTAATGTACATGTCGGAAAGGGTTCAGGCGTCAGT…
LOC108207659	AAATAATCAAACATCTATGGACTCCAAACACTTCCTCATTTTTGCTAATTCAAGAACACCTTATGTATGCTTACAACCCCTTTGTATCTATCACCTAGTTTTGTCTATCTTTAGAAGTTCCACTTCTACAAGTCACTCTGCATTTTTCTCCACCGCTCCAGCTTCAAACTTATCCATTTGGTTTGTTTTGTGCAAACAGAGAAATACCCAGTTGATCAATTTGTGTTCTGTATAATGGAGGGGTTTGGAATTAAGTGGAAGATTGGGAGATCAGTAGCAGTGATTGTGTGGAGCTTTGCTTTAGCTGCAGTGTTTGTTTCAGCAGAAAGGAGCTTGAAGGAAGAGGGGTCTGGTTTGATCCATAATGCATCTGATGAATTTGAGCCAACTTTTCTGTTT…
LOC108208290	AAATGCATGTCTCCAAACGGCCTCTTATTTAAATTAAAACATCGAGGGAGGATCCATTTGAATCAGCGCTATCGTGCAATTGGGATCAATTATATATGTTGGCAAGGGAAAACAGTAGTTCTACCAAACCCGCCTCAAAGTGGACAACGAGAAATGCCAACATTCTCATTCCGGAATTCCCACTTTGCTTGATATTTTGGTCATGCAGCTGATATGAGGCAAAAGAACCCAAAGGCTGGCAACCCATTTAATGAAATTGCACCTATTAAATGGGAGATAATTTGTGACCACTGCGAGGGATTCCTTGTGACTCGGCCAACTGTGTGCGAGAGAACATCAGAAGAGCACACAATTGCTGAAGGCGAAAGCATTGGAAGCAGCTATGAATGACATTAATAA…
LOC108208290	TAAATACGCAACCGAAACCAAAAACACCAAAACCGACGGCATAAACACCACCATCCAATAATAATCCACCGTCTGCTGATCCGTCAAATAAAACGCCCCGGGAAACACATCCTCCCCGCCGCCGCCGCCGGAGCTCACATTAATCGACAACGGCTGAATCCTCAAATCCCGGCAAAACACGCGCTTCCCGTCCTCCGCCGGGAACACAATCTTCACGCTAATCGAGGTGGACACAACGATCACAATCACGATACACAACAAGAGGGAAATCAAGACGGGGCGTTGTAATTGGATCAGCGCTTTGTCTTCTTCGCTCAGATTGTCGTACTCGTGCTTCGGCATGAAGGCTTGCCGGAGAGCGTTGCTGAGTAACGCCATGGATGTGTGTAGTTTGATTTG…
LOC108204275	GCTCCAGAAAAACAAAACAATGATCTGCCTGATTGGGTTGGCAAGGGAAAACAGTAGTTCTACCAAACCCGCCTCAAAGTGGACAACGAGAAATGCCAACATTATCATTCCGGAATTCCCACTTTGCTTGATATTTGTCAGACAACAAAAATTATTTGTTACATGTACAAACTTCATACAGTATATGCAAAATCGTGACAGTCAATCTTTATCTCTCTAACAAGCTTTATATGTCCAATGTACTCTTTGTGTCCAGTGGTCATGCAGCTGATATGAGGCAAAAGAACCCAAAGGCTGGCAACCCATTTAATGGAATGTATATAATACGTTTGTGTGATGACAGAGGATCGATTCAGCACTTTGTAAAAAAAATTCATAGTTTACATGCTACTCACTTG
LOC108194657	CCATCTGTACCCGCACAATCCATCTTCATTCAGGTTCAGGCCCAAGCCCAGTTAGTCATTGTTTTCTCCGCTGCTTGTGTGTATATGTACGTATACGTGTGAGATGAGGATGAATCAATGGCGATTCCAAAGATTTAAGATCAATTCTCACACTCTACATTGTTATGATACTTGTTTCTATCGCTTCCACTCTCAAATTTTAAACAATGAAGAAAGTGCTTCAGGAAGCCGATAAGAATGGTCGAAGAAAGCGCTTAATTAATAAATAAGGTAGTGGCATCAATGGACTGGCCTGAGGTCACCACATACAGAGAACTCTACACACATGGTCAGTGAGAGGAAATATTAAGGAATCTCTACTGCACTTGTGAAACTGAAAGGGGTGTTGTTGCTAGTGGC…
LOC108194673	CCCGCACAGTCCATCTTCATTCAGCTTCAGGCCCAAGCCCAGTTAGTCATTGTTTTCTCCGCTGCCTGTGTGTATATGTACGTATACGTGTGAGATGAGGAAGAATCAATGGCGATTCCAAAGAATTAAGATCAATTCTCACACTCTGCATTGTTATGATAGTTGTTTCTATTGCTTTTACTCTCAAATTTTAAACAATGAAGAAAATGCTTCAGAAAGCCGATAAGAATGGTCGAAGAAAGCGCTTAATTAATAAATAAGGTAGTGGCATCAATGGACTGGCCCGAGGTCACCACATACAGAGAACTCTACACACATGGTCAGTGAGAGGAAATATTAAGGAATCTCTACTGCACTTGTGAAACTGAAAGGGGTGTTGTTGCTAGTGGCATGACCAGG…
LOC108203265	TTGAATTGTGAGCATACGTCATGAAAAGAGAGAGATTCTTCTCCATGTGTGTCAAAAAAGAAAGATATTTCGAGTAAAATAAACACAAGGAGAAGAAACGTAGCCAAACAGAGCGCAATACTTTTGAGTCTCTCTCCGCAGATCCCCCAAATTCACACACAACACACGAACTGACACACAATCACATACTTTTATTCTCCCCAATTGCTCAGTTTTGTCATTTTTTAACCCGGGTTCTGACCCGACCCGGATCCGGAGTTCAAGAAAGTGGCCAACTTTGTGCTCAAAACGGCACCGTATTGCTGAAATAAACAGAGAGACAGATACAGCTGTTAGGGTTTCAATTTTGAAAAAAAGGGAGAGAGAGAGACTGGGAGAGAGAGAGATGGATGAGCTTGA…
LOC108203274	TCCGATGGTAATTTCAAATTCATAAGAATTAATGAGCCAGTTAGGCCGTGCCAGGCGTTTCATGTTTTCACCGTGGCAGGGGTAAATAACCAGCGGATAAGAACAACCGGAATAAAACGCACCCGAAAGTGACACATAAAATCAAAACAATTTTCATCAAAATTTCAGAACCAGCTTCATCAATCTGCATCGGTGAGTGATGGATCGTCTCCGGCAACGGCAGCGTCAGGTCTTCTCCGGCTTCACTAAATCGGAGGTCGAGAAAATGGAGAAGTTGCTCAAGGAGTCTGGAGAAGAGGCTGCAGATATTGCGTTCTGTAAAAAACTGACAAGGAGTTTTAACTCCTCGACGGGTCGAGCTGGGAAACCTGCTTTGAAGTGGACTGAGGTACAAAGTTG…
LOC108204690	CTTAAAATGCGTGTCAAAAAGTAACGTAAAGAACCTGGTGGGACGGAGGGAGTATTGATTATATATTCATAAAAACTATTCCATGACACCATTGTCTTATAATTGCCTTGCTCAATGTAAATTTGAGTTTATTCATTTGCTCAAATGTATTAGTGTGCCTATATATACCTGCTGTTTAGTTATGCAATGAAACAACTGCAACAATACATTCAAAGAGAAGGGAAGGCACTGCAAGCAAGATGTCGGATTCGGATAAAAAAGTATCAAGAGTTCCTGTCTCAAGACCCGAATTCACTATCAGTGACCTTAAGAAAGCTATACCTCCCCATTGCTTTAAGCGTTCTGCTTTTCGCTCTTTTTCATACCTTCTCTCTGATATCACCGTTTTCTTCTCTCTTT…
LOC108214098	CAGTGTATAATTGAATTGTATTAGGAGAAGGAGAGAGAGCCCATCTGTATCTCTTTCAGCTTCCTCAAAACCAGAGAGAGAGAGAGAGAGCGAGAGAGGTAGAAATCATAGAATCCGTGAGGCTATGGAAGACAGGGAAACCAGAGATTTTAGGCCAAGAAAGAGAGACCGTGGAGGAGAATCGAGTCTGCCTCCAATGGATATCTACTGCTCACGCTACGTCTCCAAACTTCTCAGCTTCACCGTCAAAAGAAAGCTAAAAAGACTTGGTGAAGTTACTTCTGTAATTTGCTCCCCTGATCATGAATCTGTTGAGAAGCTGAGGGCTCTCAAACAATTGGCTTCTTTGATTGTAGAAGACACAAGACTTGGTGATTATCTGGACTCGAAGGTGCTCCC…
LOC108201770	TACATACACGTGCTCATCTGTTGCAGTCTTGATTGGGGTTTATTACAAAGATTTGAGATTTTAATGGGAATTCCATCAGAAATGAGAGATGTGTGGGCTGCTGCAAGGAAAAATTCTATCTTAATTGCTTCTCCTTCTGAAGATCAGAGGCTTATTAATTCAAGAAATTGTACCCAAGAGGGTGTCCGTGCAGGAGCTAAGGCAGCTTCGATTGCCTGTGTTGTCAGTGCTGTTCCTACGTTGGCTGCTTGTCGTATGGTACCCTGGGCCAAGGCAAACCTCAACTATACTGCTCAGGCTCTCATCATCTCTAGTGCCTCTATCGCTGCATACTTCATCACCGCTGACAAAACAATCTTGGAATCTGCAAGAAGAAAGGCTGAGGCTGAGTACAGGAAA…
LOC108201770	TGATGATTAAGTATGAAGATCTGGCATGAGAAGTATGTTATGTACATCTTATTGAATGCATATCGTAGTAGCGAAATTGAGGTTGAGGTCAACTCTGCAAGTAATTAAATACAAGTCTGAGCTTATACAGGTTATAATTGAGTACTTGTGTCTGAGACAGTGAGACTGCAACTGATTTTTTATTTTAGACGTGTATTTGAGTTTACATGTAGCAACTCGGTTTATGCTTACGTTTCCAGTCATCATATGACAATTGATTTTCTAGTTGAATGAATTGCAGAGGCTGTCCGTGAAGGAACTAAGGCAGCTATGATCACTTGTGTTGTCAGTGCTGTGCCTACCTTGGCTGCTTGTCGTATGGTACCCTGGGCCAAGGCAAACCTCAACTATACTGCTCAG…
LOC108201770	TACATACACGTGCTCATCTGTTGCAGTCTTGATTGGGGTTTATTACAAAGATTTGAGATTTTAATGGGAATTCCATCAGAAATGAGAGATGTGTGGGCTGCTGCAAGGAAAAATTCTATCTTAATTGCTTCTCCTTCTGAAGATCAGAGGCTTATTAATTCAAGAAATTGTACCCAAGAGGGTGTCCGTGCAGGAGCTAAGGCAGCTTCGATTGCCTGTGTTGTCAGTGCTGTTCCTACGTTGGCTGCTTGTCGTATGATACCCTGGGCCAAGGCAAACCTCAACTATACTGCTCAGGCTCTCATCATCTCTGGTGCCTCTATCGCTGCATACTTCATCACCGCTGACAAAACAATCTTGGAATCTGCAAGAAGAAAGGCTGAGGCTGAGTACAGGAAA…
LOC108201770	CTCTACATACACGTGCTCATCTGTTGCAGTCTTGATTGGGGTTTATTACAAAGATTTGAGATTTTAATGGGAATTCCATCAGAAATGAGAGATGTGTGGGCTGCTGCAAGGAAAAATTCTATCTTAATTGCTTCTCCTTCTGAAGATCAGAGGCTTATTAATTCAAGAAATTGTACCCAAGAGGGTGTCCGTGCAGGAGCTAAGGCAGCTTCGATTGCCTGTGTTGTCAGTGCTGTTCCTACGTTGGCTGCTTGTCGTATGATACCCTGGGCCAAGGCAAACCTCAACTATACTGCTCAGGCTCTCATCATCTCTGGTGCATCCATCGCTGCATACTTCATTACTGCTGACAAAACAATCTTGGCATGTGCAAGAAGAAATGCTGAGGCCGAGTACAGG…
LOC108201761	TACATACACGTGCTCATCTGTTGCAGTCTTGATTGGGGTTTATTACAAAGATTTGAGATTTTAATGGGAATTCCATCAGAAATGAGAGATGTGTGGGCTGCTGCAAGGAAAAATTCTATCTTAATTGCTTCTCCTTCTGAAGATCAGAGGCTTATTAATTCAAGAAATTGTACCCAAGAGGGTGTCCGTGCAGGAGCTAAGGCAGCTTCGATTGCCTGTGTTGTCAGTGCTGTTCCTACGTTGGCTGCTTGTCGTATGATACCCTGGGCCAAGGCAAACCTCAACTATACTGCTCAGGCTCTCATCATCTCTGGTGCATCCATCGCTGCATACTTCATTACTGCTGACAAAACAATCTTGGCATGTGCAAGAAGAAATGCTGAGGCTGAGTACAGGAAA…
LOC108204259	TGGTTATTTGGGGCCAACACCCCGAAGATAGAGACCATAGCGTGTAACATCATACGCGTTAGACAAGTGGAAGCTCGTACGAGCATTAGAAATTCGGAAACTTTACAAAATAAAATCGGATCGATCACGACGCTACTCTCCGCATCCGATGCAGCGTCAACTCTGAATCGCCCGATTCAACTCAACATCTTCTTCCCGACTCCGATCCGCCGTCAACATATCCCCGCTACTCGATTGAGGGTTTGAGTTTTGCTGAAATTGGTTTTTTGGTTTGATATTGTGATTTGGAGGGGGAAGTGGGGGACTGTATGTGGTTACGGCTAAGATGAAGCGTTTTGTTTATATAAACGATGATGACCAGTCGCATGATCTTTATTGTGACAATCGGATATCAAACAG…
LOC108203172	GATCTCTCCACCTGTCCTACTTCCCAACAGCTGGATCATCCAAATGATACAATAATAAATAATATAATATTCCCCTCTCTTTCTTCTCCTCTTAAACCCAACCCAATCTCATCCACTTTCCAATCCACAAAAACCAAAAGTTGAGAATTACCCAACAAATAAAATACCTTTTTTTAATAATTACCAAGGAACTCTGAGAGTACAGGTAGCATGAAGGGAGCACAGAGTAATGGAGTTGGGCAGGATAAGAAAGTGGTAGTAGGTAATAGTCCTTCCAGGGCCACTGCTAACAGCAATAGGAATAATAACACTTGCAATAATATCAATGAGGCTGCGGTGGGAGGTGGCGGGTCGTCGGAGAAGGGTGGATCGTCGTCTGGCAGTGAGCCTGCTGCCGCG…
LOC108204253	TAAAAAATGCAGGTGTTAGATGCTTTCATAACTTGATAACTTTTTATAAGAACTTATCGAGGCCATAAAATTGCATATATACTGGACAAACTTGCCATCTTGCTGGTCATACATGGAGCATGTAGCATTAATAATACATACAGCCTATAGGCTATGGCTAAAGCAACTTCCATTACAAACAAACATGCAGAGATTTACCAACTATATTTACATTACCCACTTTCTGCATTTTTACAAGGGGATTAACTTGGTAGTTTTGCATTTATACAAGGCCGTTAAGTGATAGTAAATGACGACGACCCTGGACTGATACTTGAGATCACATCCGAGATGCAATCAGTCGGTGATGGCCATTAGGTGGGTGTGTAATCATGCAGTAAATCCCTTGTTGACAGAGCT…
LOC108209512	GCCGCGCTCCTCAGAGCTAATAGCCAAGAAAAGCGAAGTGGGCTGCTTTTAATTTCCAAGAAAAGCTTCAAAGGATAATCTTGAGGATGCAAGGAAGTGCAGTGATGGGTTCTGTTCAGCAGCCCATTTGGGTTAAAGGGTCATCAGTTTTTCATCCGAAAGGCTCTGCTGCTGTTGTTGGATTTCCACATCAGGCTAGATTAAGTGTTTTGAAGCCGTGTAGATGTTCGTCTCAGCTCCAAGCTAGCTTGGTCACTGGGAGGCCACCCTCTTCTGCTTCTGTTCCTGTACCTGATATGGGAGGTGATATGATAAACTTTCAAGACAACCCACTGAATGAAGTTGATCCGGAAGTTCGGTCCCTTATCGACAATGAAAAACAACGGCAGTTCCGAAGCT…
LOC108211272	CTCCCTCTCTCTGTCTCTCTCCATCTTTCTTCTCTCTCTCTCTCTCCTTCTCTCCCATGGACGCAATTACAAACTCGCAGATACTCCTACAGCTGAGAACCTTTCCCTGCTCTAATGTCTCACATTTGAATCACCAATCATCACTGTCTGGCACTCGGTTTACGTGTCTCACGCCTGAACGCAACCGTTTGTACCAAGGAGTGTGTGTTTCCAAAGTGTCTACATTGAATGGACATGTTCTTTTATATCCCGGATCATCTAATAAAAGGAGAAGCAGCACTCTTGGAGGATTAGGACTTAATGGTTCGATTACGGGGAACAGTTTAGTGGGGAAAATATGTTCATCTGCAGGATCGTGCACATATCCAGATAGTTCTATTGAATCTCATTCGCATATTG…
LOC108205631	ACACTGTCCGCTTATAATGAGAGCCATGACCAAAATATCTAGAGCACAGAAAAATGGCAACATCTTCACTCCTTTCACTAAAACCAACCTTATGTCCTCCCCTCTTCACCTCTCTCTCTCCCCCCATCTTCTCTCCCAATCTCTCCCCAATCTCTCCATCTCTCCCAAGAAAAAACATTCCCAAACTACCCTCTTACTCCTCATACGAGAACTCAAACTACAACTCCCCGGAAACAGAGTGCCCTGTTCCGCTTGATCAGCAGCCTGTGAATGAGTACCAGTCTTTATCTACTTCTCAGCCTTATTCATGGGCCTCTGGTGATCTTGCTGAGTTCTCTTCCAGGGTGTTTGGGACTGGGCTTTCTTTTGCTCTTTTTGTTGGGCTGCCTGTTTCTTGGT…
LOC108205507	AACAAGCGAGGTGTCGACATTATAACGACTATTCCATAAACAAAAAATGCAACATGTATAGCTTGTGTCATCCTCTCAATCTCTGCAACCCCTTCAATGTCGACATTTTCTTCTTCTTTCTTATCTCTCTCTACATATATATACACACATGATCCTAGACAAAACATCCCAAACAAACAAATCCTTAAGGGATATACCCTGTGCCCACCTCTGTGCAGAACATCCCTTTTCTTCATAGAGATTTGTGTCATTTTATTGACTTTTGAGACTTTTTGTTCACGACCCAGATCGTAATTTGGTGTGATTTACAATACCCATGTCTTCAATTCAGGAATTGGCAGGTGGGCTTTGGCTTGGGGAGTTTAGTGGCCTAATCACCGGAAAGGCTCGAGCTTTTTC…
LOC108205104	AGCCACAAAATGTCTTGGGGATATCAATTATCGTAAGTAGAATATCCATTACATTTGATCCCCTTGATGCTCCCCAGGAACTCAAGTACTCAAACTAGTTCTGTTACTATAAAACACTCGTGTAGCCTTCTAGACAGCAGCTCTGAAGTGACCCAGTTCAATCTTGTTCAGTTTTTTCCAACCATTTCATCAAGAATACAGGTTTGAGGGTGAAGGTGGAAGTTGCTATGGCTCATTTGATTTCTACCTCTTGTTCCATAAGTATCCCTTCAAGAAGCAATTTTTGTTCCAAAGAACAGAATATTGTAGGCACAAAGGTCTCTTTTGCATCCTTTGGTTCACAAGTTTCTAGCTTTTCGCTTAAGAAGCTTATCCATCGAGGAGAGAGATCACAAAGAG…
LOC108205198	AATATATGTCTCGGATAGTAAACCTGCCAAGATTCGACAGCTGAGTAACTTTTAAGTAACACTTAAATAAACAGATGAATTCCACCCTAAAGAAGATCGGCAACATTGGCTGGCAGCTCCTCCACTACTACATTGTAGAACTTCTGTATGTCAACCAACATCCTGTCATCATCCTTGGTCACAAAGTTGATTGCAAAACCTTTCCTTCCAAAACGTCCACTACGACCAATACGATGAAGGTAGTTCTCTGGCTGAGTCGGCAAATCATAGTTAATTACAAGGGATACTTGTTGGACATCTATACCACGAGCCAGAAGATCGGTGGTAATGAGCACACGAGAAGAACCAGAACGGAATTCACGCATAATTATATCTCTGGTGTTTTGATCCATGTCTCCG…
LOC108203902	CAAACGGCGCCGTTCAACTCCGAGGTTTTGTATACAAAACAACACTTTTCACACTACTTTCTATCTCTTTGCAAAATTCTCAACTCCTGCGGCGTAGATCTAAGGAGTTTGAGAAAACCCTAATCGTACTTTTCAAGAACCCACTTCACTCTTCAACTCATCTTCAACAATCATGGCTGGAGCTGCACCAGAAGGTTCTCAATTTGATGCACGTCAATTTGACGCAAAAATGACCGAGTTACTTGGTGCTGAGGGAGAAGATTTCTTTACATCCTATGATGAGGTTTATGACAGTTTTGATGCTATGGGATTGCAGGAGAATCTCTTGAGAGGCATCTATGCCTACGGTTTTGAGAAACCATCTGCAATTCAGCAGAGGGGAATTGTTCCATTCTGCAA…
LOC108203902	CAAACGGCGCCGTTCAACTCCGAGGTTTTGTATACAAAACAACACTTTTCACACTACTTTCTATCTCTTTGCAAAATTCTCAACTCCTGCGGCGTAGATCTAAGGAGTTTGAGAAAACCCTAATCGTACTTTTCAAGAACCCACTTCACTCTTCAACTCATCTTCAACAATCATGGCTGGAGCTGCACCAGAAGGTTCTCAATTTGATGCACGTCAATTTGACGCAAAAATGACCGAGTTACTTGGTGCTGAGGGAGAAGATTTCTTTACATCCTATGATGAGGTTTATGACAGTTTTGATGCTATGGGATTGCAGGAGAATCTTTTGAGAGGCATCTATGCTTACGGTTTTGAGAAACCATCTGCAATTCAGCAGAGGGGAATTGTTCCATTCTGCAA…
LOC108203902	CAAAACAACACTTTTCACACTACTTTCTATCTCTTTGCAAAATTCTCAACTCCTGCGGCGTAGATCTAAGGAGTTTGAGAAAACCCTAATCGTACTTTTCAAGAACCCACTTCACTCTTCAACTCATCTTCAACAATCATGGCTGGAGCTGCACCAGAAGGTTCTCAATTTGATGCACGTCAATTTGACGCAAAAATGACCGAGTTACTTGGTGCTGATGGAGAAGATTTCTTTACATCCTATGATGAGGTTTATGACAGTTTTGATGCTATGGGATTGCAGGAGAATCTCTTGAGAGGCATCTATGCCTACGGTTTTGAGAAACCATCTGCAATTCAGCAGAGGGGAATTGTTCCATTCTGCAAGGGGCTAGATGTTATTCAACAGGCACAGTCTGGT…
LOC108201369	CTTATTTTTGAAAATAATTTCTACTTGTATTTTTCGGGAATCCCCCCCCACACCCACCACATAAAATTCGAACCCATGGCATTACGAGTTGAAATTTGGTTCTGCTTTTCAAGATTCAAACATATCCAACGAACAAGTGGATCAAGATTGTAGATACCAGAATGGTGGTAAAAGGAGTGATGCACAATCTTTGGAGGAAGCTTTAACTGAAAAACCTCAAAATCTGGGCAAAAGCACGTCCATGCATGAGCAGGAGACATGAAACATCCAAGAGGACCTTACAGCAGAAACTGAACAAAAATGGTGGATAAATTGAAACAATGGCCCGAACTCTGTGATTCGAGAGCCTGAGACTAGTAAAACTAGGAGCTGAGCTAGGATTCACGACGATTTCTCCTG…
LOC108207017	TTTCTTCTTGTGCATCCTCTGCATCTCCACAGACACAAACACTTCACTTTTGCATCACATTCTTTGCATATAACTTAAGTTACACTTGCTGCAAACATGGCTAGCATCAGCTGCTGCGCTCTTGCCTGCATCGTTCTCTTCTACGTGTCGGTACCGGTATCAGCTCATGTTGAATTCTCAGAGAAAGTGACAGATAACCCTGCTGATAAGCTAGTCGCGGAGCTTAACAGTAATAGAACTGCACGAAAAGGATCATCAGCACTCTTTAACAATCCGGGCCTGGCATGCATAGCCCTGCAGTACATAAAGGCATACGGAGGAGATTGTGATTCAGTGGGAGGGAAAAACGCCAAGAAGCCTCCTGATGCTGAAATTGCTGAAACCTTTGCCCCCAACTGC…
LOC108209568	AATTTAGAGTGCATGAAGTTAGATATGCGGATAAAATGGAAAGAGTGAAGAATTGGCGCCGTGCACTGGGACAAGTTGCCGAGTATTCAGGAAAACATGTAGACGGAACAAAGTCTGAAGCTGAAATTGTCGACGAAATTGTCAAGGAGATTCTGCTACAAATAAAACCCACTGCTTTAGATGTTGCCAAATATCCAGTTGGGTTGGAATCCCGCGTGAAATACATAACAACAACATTGTTGAGCAGTAGCACGAGAAGTGTCGTTAAGATCGGTATATATGGTATGGGTGGTGTAGGCAAAACAACTCTTGCCAAGGCACTTTTTAATAAACTCTTGCTAGGAAGCTTTGAAGGAGGTTGCTTCCTTGAAAATGTGAGGGAAACTTCGGGGAATGTTA…
LOC108209568	GTGCATGAAGTTAGATATGCGGATAAAATGGAAAGAGTGAAGAATTGGCGCCGTGCACTGGGACAAGTTGCCGAGTATTCAGGAAAACATGTAGACGGAACAAAACCGTTTTACAAACTGCAACTTCAAATTGTTAACATCAGAAACCAATTTTCTACACTCCTCTGTTACCTGCCCTACCCTTGATCTCATGGGAGCAGCACTACGGATCATTTGAATTACCACCAAGCAATCGGATTCAACAGTAACTGATCTCCCCTGCATTTCTTTGGCCCAGCTTAATGCTTCCTTAACCGCCATCGCCTCAGCCAAACTTGGATTTATCACTGCTGGAAAGCTTCTGGTACGAGCTAAAAGAAGATGTCCGTGATGGTCTCTAGCAATAAGACCTATACCTGA…
LOC108209568	GACGTCCAGTGAAAGGGGCTAGTGATGAGACCTCAACACCACGGTTGGGGGCAAAGGTTTCAGCAATTTCAGCATCAGGAGGCTTCTTGGCGTTTTTCCCTCCCACGGAATCACAATCTCCTCCGTATGCTTTTATGTACTGCAGGGCTATGCATGCCAGGCCCGGATTGTTAAAGAGTGCTGATGATCCTTTTCGTGCAGTTCTATTACTGTTAAGCTCCGCGACTAGCTTATCAGCAGGGTTATCTGTCACTTTCTCTGAGACTTTATATCAAAGAAAATGTTCAGATTAAA
LOC108209568	CTGGTTGAATACTTGCATTTTTTTTCTGTAAACTACATGAATCAGATGGACGTAAGAAATTAAAAAAGGAAAATTATCAAGTATAACTTAATGAAAAGAGCCCTAAAATTGGGCAGAGAGAAGCCAAGACTGCATGTAAAAGGTCACACCAGAGAGGCATAACTCATTACAATGAAAGCTCCAACGAGTATAGGCCAGAGACGAGGATGGCGAAAGAAACTATAGCTTCCACTGCAATCATCATTGGCACCACTGTAACATCCGGGTCTGGTTGACTTAGCCACACCTCCTTCAAAAGCGAAGCTGCTGTTGCCTTTGCCATTGCTGAACAGAACACACCAAAAATACGGACCTCCTCCATCTGCCCCGCTAACACCTGCACCCACCTCAGAGTGGTTA…
LOC108216422	ATGACTAGATTAAGATTTTTTTACTTGGATGGCATTAGTCTCACTGGAAAGTTTAAACTGACACTAGAAGATTTGAGGTGGTTTTGTTGGAATCAGTGTCCTCTAGAGTGTTTACCTTTCGATTTTTCCCCTCAGAAACTTGTTATTCTTGAGTTGCCAGCGAGCAAATTGACAACAATGTGGGAGGTTTCCGAAGATTTGACTACCACACCAGATTTCAGAGGACTAACGCGTCTTGAAAATTTAAAAACTCTTAACATGTCCTTTTCCAAAGATTTAACTAGCACCCCAGACTTTAGAAGACTGCCACGTCTCCAAAACTTGTATCTTGAGGGCTGTAGAAGTTTGAAGGAGGTCCATAAATCAATTGGAAGTTTGGTGAGACTTGTTTCCCTAAAT…
LOC108211810	TTGAGAGCTGACTAATACCGGAGGGCAGGGCAGTGATTGCACTATAAGATAAATCCAACTTTGTCAATGGTAATGAAGTCTGGCTTGATTCTATGTCAGGAACTTTCTCTAAACTAGTAATAGATGCATTTAGCTCCAATAAGCTTGTAAGCTTCCACAGTTGATCAGGTAACCTCTCTAGTGTATTAGAATAAGATATATCAAGAATTTCCAATGATCTCAGGTCGCAAATGCTG
LOC108202836	TTCTCCTTCTCCCCAGAACATCTTTTGTAAAAAAGGCTCTGCTCCCATATACAATATTTTCAAAACTTACATAAATCTCTTCCCAATGGCTTCAACAAGTGCTGAAACTCCCACTAGCTGGGACGTTTTCTTGAGCTTCCGTGGCACAGACACTCGAATTGGTTTCGCCAGTCATTTATACTCTGCCCTGCATCGCAATGGTATTCGAACTTTTATGGACGATCCTGAGCTACGTCTTGGAGATGGGATCTCGGCTGAATTGCTCAAAGCTATTCGGGAATCCGAAATTTACATTATTCTCCTCTCGGTAAATTATGCTTCTTCGAATTGGTGTCTTGATGAGCTGGTAGAGATCATTAATTGTAAGGAAACAATGAATAGATTGGTTATTCCTGTGTT…
LOC108202872	TTCTCCTTCTCCCCAGAACATCTTTTGTAAAAAAGGCTCTGCTCCCATATACAATATTTTCAAAACTTACATAAATCTCTTCCCAATGGCTTCAACAAGTGCTGAAACTCCCACTAGCTGGGACGTTTTCTTGAGCTTCCGTGGCACAGACACTCGAATTGGTTTCGCCAGTCATTTATACTCTGCCCTGCATCGCAATGGTATTCGAACTTTTATGGACGATCCTGAGCTACGTCTTGGAGATGGGATCTCGGCTGAATTGCTCAAAGCTATTCGGGAATCCGAAATTTACATTATTCTCCTCTCGGTAAATTATGCTTCTTCGAATTGGTGTCTTGATGAGCTGGTAGAGATCATTAATTGTAAGGAAACAATGAATAGATTGGTTATTCCTGTGTT…
LOC108202872	TTCTCCTTCTCCCCAGAACATCTTTTGTAAAAAAGGCTCTGCTCCCATATACAATATTTTCAAAACTTACATAAATCTCTTCCCAATGGCTTCAACAAGTGCTGAAACTCCCACTAGCTGGGACGTTTTCTTGAGCTTCCGTGGCACAGACACTCGAATTGGTTTCGCCAGTCATTTATACTCTGCCCTGCATCGCAATGGTATTCGAACTTTTATGGACGATCCTGAGCTACGTCTTGGAGATGGGATCTCGGCTGAATTGCTCAAAGCTATTCGGGAATCCGAAATTTACATTATTCTCCTCTCGGTAAATTATGCTTCTTCGAATTGGTGTCTTGATGAGCTGGTAGAGATCATTAATTGTAAGGAAACAATGAATAGATTGGTTATTCCTGTGTT…
LOC108202903	TTTGAAAGTTAGGTAGACGAATGTTATTGACCACACCTTCCTCGTGTCAAATACAGACTGAACACTGATAATCTATTATCTCTCTCCCTGCTCTCTCTCTCTGCTCATCTCTATGTCCACAAATGACAACTACAACCAATCTCCTCCGTCTCTCCCTCTCCTCCCATCCCAAACTCTCTCTCCACCGCCCTCCTCACCTCACTCTCCGCCCTAATCTCCGCCGCAAATGTCTCTCCCCGCCTCTCATCTTCGCCAAGGCCGTCGACTTCAAACCTTCGCCTCCGCAGCTCCAGCAACAGAACCTCTCCACTGACTCGATCCTCCTCGACGTCACCGGGATGATGTGCGGCGCGTGCGTCTCACGCGTCAAGTCGATCCTCGTCTCCGACCTCCGCGTTG…
LOC108202903	ATTGACCACACCTTCCTCGTGTCAAATACAGACTGAACACTGATAATCTATTATCTCTCTCCCTGCTCTCTCTCTCTGCTCATCTCTATGTCCACAAATGACAACTACAACCAATCTCCTCCGTCTCTCCCTCTCCTCCCATCCCAAACTCTCTCTCCACCGCCCTCCTCACCTCACTCTCCGCCCTAATCTCCGCCGCAAATGTCTCTCCCCGCCTCTCATCTTCGCCAAGGCCGTCGACTTCAAACCTTCGCCTCCGCAGCTCCAGCAACAGAACCTCTCCACTGACTCGATCCTCCTCGACGTCACCGGGATGATGTGCGGCGCGTGCGTCTCACGCGTCAAGTCGATCCTCGTCTCCGACCTCCGCGTTGACTCCGCCGTGGTCAATATGCTGAC…
LOC108202903	TTTGAAAGTTAGGTAGACGAATGTTATTGACCACACCTTCCTCGTGTCAAATACAGACTGAACACTGATAATCTATTATCTCTCTCCCTGCTCTCTCTCTCTGCTCATCTCTATGTCCACAAATGACAACTACAACCAATCTCCTCCGTCTCTCCCTCTCCTCCCATCCCAAACTCTCTCTCCACCGCCCTCCTCACCTCACTCTCCGCCCTAATCTCCGCCGCAAATGTCTCTCCCCGCCTCTCATCTTCGCCAAGGCCGTCGACTTCAAACCTTCGCCTCCGCAGCTCCAGCAACAGAACCTCTCCACTGACTCGATCCTCCTCGACGTCACCGGGATGATGTGCGGCGCGTGCGTCTCACGCGTCAAGTCGATCCTCGTCTCCGACCTCCGCGTTG…
LOC108204979	GTATAAAGCCGCCATTCACTCTTCTTATTTTCTTCACCAATCTCATTGTTTCCCTCTTTTTTTCCAACCTCTTTTCTCTCTTTAACTACTTATTACTCACAACTCTCTGTAACTACAGCATTGTAACATATAACTACACAAGCAGGGGAAGATGAAATATGTGTTGGTGAGTGGTGGAGTGATCCATACTTAAATACTGATGCTGGAACGATGTCCCCTTTCGAGCATGGTGAAGTGTTTGTCTTGGATGATGGCGGAGAGGTGGATTTGGACCTAGGGAACTATGAGCGGTTTCTAGACATCAAGTTGACTCGTGATAACAATATCACTACTGGAAAGATTTACCAGTCTGTCCTTGACAAGGAGAGGAGGGGTGATTATCTGGGTAAAACCGTTCAG…
LOC108204979	TCATGATACATTATTACATTTGTTTTTCGAACTCCTCTCTGATTGTGTTCCTGTTGAACGTGATGCTGTTTGCCTTTTGAATGATCCATACTTAAATACTGATGCTGGAACGATGTCCCCTTTCGAGCATGGTGAAGTGTTTGTCTTGGATGATGGCGGAGAGGTGGATTTGGACCTAGGGAACTATGAGCGGTTTCTAGACATCAAGTTGACTCGTGATAACAATATCACTACTGGAAAGATTTACCAGTCTGTCCTTGACAAGGAGAGGAGGGGTGATTATCTGGGTAAAACCGTTCAGGTTGTCCCACATGTCACAGATGCCATTCAGGAGTGGATTGAACGTGTAGCAGCTATACCCGTTGATGGAAAAGATGGGTCGCCTGATGTTTGTGTTAT…
LOC108211733	ACCAAGGCCAAAAAGAACAGGAGCACAAAGCAGCGGCAACACAACGCTTGTCACACAAGTACACACGATGCCTTCCATGATAGCACAGATCCGACTAGTGAGTTCACATCCTGAAGTTTATGAGCCATGTGAAGATTCATTTGCGTTGGTTGATGCGTTGTTAGCTGACCGAAGTAAGTTGTTGGAACACCAGCCAGCGTTATGCTTGGAAATTGGTTGCGGCAGTGGTTATGTCATTACTTCCCTAGCTCTTATACTTGGACATGCGGAGAGTGGGGCGTACTATATGGCTACGGATATTAACCCTTATGCAATACAAGTGACTAGTGAGACACTGGAAGCACACGGGGTTTATGCAGAGTTAATAAGGACTAATATTGCATCTGGATTGGAGGGGCG…
LOC108216509	ATGACTATCAGAACCATTCTTTTTTTTCATGTAGTTGATAAACATGCTCTACAATTTACTCATGGAGTTAGAGGCACACCAGATTGTGCATGGCCTCTTGATACGAAAGCGAAAGAAAGATCTGCTCAATCACCTGGACATCTATGGAGACTTGATGGAGCTTCACTGAATATGTCCTCTTCTATATCTTGCATAAAGAAATTCGGGAAGCCCGGTCAGCATAAGATTTTGATTGCTACCCTGGGATCTGACACATCTGGTGGATCTGTTTCTGTGCTGAACCTTAGTCATCAACATGCGCTCCCTTCAGGTTTACCCATGATACAGGGAAATTTTTATGAAATTGCATCATTTAATCGCACAGTTTGGACTGCAGATTGCAACTCCAGGGGTAGTCAA…
LOC108216509	TCGAAATTTCGAAACTTCGACACAAAAACCTAAGTGCAACGGGAACCCGCCTGCTCAAACATAACTCCAGTTCAGTTTTGCCGGAGAATCTTACATAAGCAATTTCTCTCACACACACGACCTCCATAAAACATAGCACCGGCGGCAATTTTGCATATTCATTCGACTCTCTCTCTCGCCCCCTCCCTCAGCTTTTTCATATTCAGAGTTTAGCATCTACTTGAAGACATGCCGCAAGAGCTTCCAGGTTTCTATTTCGATGCTGAGAAGAACAGATACTTCCCTATCAGAGGCCCTATTCCTGGCTCATCTCGAAGTAATAATGATAATAATGCTTCTTCTTCCTCAAGCCGTGCTCATAAATCTTCGACTGAACCTGAACAGTCTATGATACGTAAA…
LOC108216509	ATGACTATCAGAACCATTCTTTTTTTTCATGTAGTTGATAAACATGCTCTACAATTTACTCATGGAGTTAGAGGCACACCAGATTGTGCATGGCCTCTTGATACGAAAGCGAAAGAAAGATCTGCTCAATCACCTGGACATCTATGGAGACTTGATGGAGCTTCACTGAATATGTCCTCTTCTATATCTTGCATAAAGAAATTCGGGAAGCCCGAAGGGAACAGGATTGCTACCCTGGGATCTGACACATCTGGTGGATCTGTTTCTGTGCTGAACCTTAGTCATCAACATGCGCTCCCTTCAGGTTTACCCATGATACAGGGAAATTTTTATGAAATTGCATCATTTAATCGCACAGTTTGGACTGCAGATTGCAACTCCAGGGGTAGTCAAGCTTTA…
LOC108209975	CTGAATTTAAACAATTGGATTGATTATTGTTAAATCGAAGTTGTCTTGCATTGGATTTGTATACACGGGAAATGAAGATGTGGTTTTGTGGATATTATAACCTAGTGATTAGTGAAGCGTCTTAGTGTAGAAGCTCATACTGATCTAGTAGCACCGAGTCAAATTCGATCAGTTGGCAAAAATTAAATAAAGATCCCCTTGTTTGAACAAGCTTCCCTTGTGAGATTAAATTCTGTGGAGTGTGACCAATAAAATTGATAAAAACAATATATCTATCTGATGATTTTTATTAGTCAGGACTCATGAAGGGATAATTATTCGTTTCATCTAATTAATTTTGAGTATGGGGTACATAGCATAGCTTCGAGTGTCAGTGAAGTGTCCTTGACAGATTTTTTT…
LOC108216567	CTCATTTTCTCGGCTAGGTTTTCAAGAAAGGCCCATTTTCCGGCGAACCACTCCGGCGGAGCTTCAAAGATCGGTACTTTTTAACTTTTTTAGCAACCCCTTTTGTTTAATTAAACAATGTATAGCTATATATACAAGAATTTAATCAAGAACATTGCTAATGTTTCTTTGAAAACAGCCCCTTTGTGTTTCTTAAATCAACGTCTTTTCTCAGATACTGTAAAAAATACTTCTACTGTGTCTCTTTTCAAGAATTATGGATTTACTGAGCCTCAAATTACTACTCTTTTGAGTAAGCGGCCTTCATTGTTATCTTTAAGTGAGGATAAAAATATTAGGCCTAGATTGGATGTATTTGCTTCATATGGGTTTTCTTCTGCTGATATATATCAGATACTT…
LOC108204609	ACTAGCACTCATTATTTTATATTATTTAATATTATTTATAAGTAATAGGATAGGTAACTATTAGACTTGCTCAAGATTACTAGCATTCGAGTAGTCCAAATGTGTGAATGTATAATTCATCAACTAGTCCAAAATGAGCACCAATCTGTTTATTACCCAATACCAGTAATGGAAACTGTATCACCGAGGTGATGATCGAGCACTGCAGAGTAACTAACTACTGCAGTTGTTTTACCAAACATTTTTGAAATTACATCTGAGACATAAACAAATTGTTGCAACCTTGAATGAGTTACAAAGGAGAATTGATTGCATTGCATGTGAAACAAGTTTTATAAAACTCAAAATAACATCCGACCATGAAGTTAAAATACTTGGACAACCTAACCCTCCCAAACT…
LOC108216578	ATGCCTGGTATAGCTGATATTCCAATCCTGGGGAAACTTGTGGACGGAATATCTGATGCTGCAGTTGCCGCCATCTTCTGTGGATTCCGTTACATGTTCTGTTACAAGGATCTTGTCAAGACTTTCGAGTCCCAAGTGGAAAAAGCTAGCATGGAGGAGGACAGGGTGTCCACAAAAGTTGCTGCGGAAAGAGCTAATGGTAAACTGATCCAGCCTCATGTAGATAAGTGGCAGAAAGAGGCTGCAAAAATCAAGGAGAGCACGGAAAAGTTTGCAGAAAAATACAAAAACAGACATTCATGGAGGTGCATTCAGTGTCTCCCAATTACCAACCCCGTCTCACGTTTTCGACTTGGGAGAGAGGCGGTGAAGAAGACTGAGAGGCTAACTGACCTCATT…
LOC108216578	ACTAGCACTCATTATTTTATATTATTTAATATTATTTATAAGTAATAGGATAGGTAACTATTAGACTTGCTCAAGATTACTAGCATTCGAGTAGTCCAAATGTGTGAATGTATAATTCATCAACTAGTCCAAAATGAGCACCAATCTGTTTATTACCCAATACCAGTAATGGAAACTGTATCACCGAGGTGATGATCGAGCACTGCAGAGTAACTAACTACTGCAGTTGTTTTACCAAACATTTTTGAAATTACATCTGAGACATAAACAAATTGTTGCAACCTTGAATGAGTTACAAAGGAGAATTGATTGCATTGCATGTGAAACAAGTTTTATAAAACTCAAAATAACATCCGACCATGAAGTTAAAATACTTGGACAACCTAACCCTCCCAAACT…
LOC108216578	ACTAGCACTCATTATTTTATATTATTTAATATTATTTATAAGTAATAGGATAGGTAACTATTAGACTTGCTCAAGATTACTAGCATTCGAGTAGTCCAAATGTGTGAATGTATAATTCATCAACTAGTCCAAAATGAGCACCAATCTGTTTATTACCCAATACCAGTAATGGAAACTGTATCACCGAGGTGATGATCGAGCACTGCAGAGTAACTAACTACTGCAGTTGTTTTACCAAACATTTTTGAAATTACATCTGAGACATAAACAAATTGTTGCAACCTTGAATGAGTTACAAAGGAGAATTGATTGCATTGCATGTGAAACAAGTTTTATAAAACTCAAAATAACATCCGACCATGAAGTTAAAATACTTGGACAACCTAACCCTCCCAAACT…
LOC108216585	GGAGCGTACCATATTATGGAATAGAGGTTGAAACTGAGCAGAGGGCTGCATCATGGCGTCTTTATTTTCACTGCAGAAGCTGCTGAGTCTCGGCACTTTGCTTAGCTCCAATTCTTCTAAATTGGGAAAGTGTATGATATCTCCCTTGCTTGAGCCATCATTCATTACTATTGCTTCCATCGCAGGGCAATTTCTTATTATCAACTTTTGCAGCTGGGTGAGACATTTTGCAACAGAGTTGCAGAAGAGGTATCTTAAACCGGAGCATTCTTTAATTTCTAAACAGGTTAGATTAGAAAAAGATGTCTGCTGGCTATGCTGAATCTCACCCTGTGACATCCTTGCCAGATACTTCATTTTGTTACATTCTTCGATGTAAAGCTTTCTCAATTCTGTGAA…
LOC108216585	ACCATATTATGGAATAGAGGTTGAAACTGAGCAGAGGGCTGCATCATGGCGTCTTTATTTTCACTGCAGAAGCTGCTGAGTCTCGGCACTTTGCTTAGCTCCAATTCTTCTAAATTGGGAAAGTGTATGATATCTCCCTTGCTTGAGCCATCATTCATTACTATTGCTTCCATCGCAGGGCAATTTCTTATTATCAACTTTTGCAGCTGGGTGAGACATTTTGCAACAGAGTTGCAGAAGAGGTATCTTAAACCGGAGCATTTTTTAATTTCTAAACAGGTTAGATTAGAAAAAGATGTCTGCTGGCTATGCTGAATCTCACCCTGTGACATCCTTGCCAGATACTTCATTTTGTTACATTCTTCGATGTAAAGCTTTCTCAATTCTGTGAATGCTTCC…
LOC108216585	ACCTTGCAGGTATCAATTTCCTCACCACAAAAGCTGGTCAAGTTTGGCAAAAGCTCTAACCGTAAACACGTCAATTCTGGAAAGACTAGGGCATCATTGATTTCTCCTTGTTTAGCTTCCCCCACGATCCTTTTCATCTTCTTGCATTTTCTTACAATAATTTCCTCAAGGTGCATAACATCTCTGGGAACCACGTTTGTAAGGCTATGACAATCGTTTATCTCTAGTTTTTTGAGATTTGGGTACAGGTTCCCTGACTTCAACCCTGTCTCCGTTAAACAAGGCAATTCATTCAGATACAAATGACTTAAAGCTGGCAGGCCGCATACATCTATGTTGCTTGCATCTGTGCCCACTCCGGAGATCAATGAACTACAATCACTTATTCTTAAGGATTGC…
LOC108200626	ACCATATTATGGAATAGAGGTTGAAACTGAGCAGAGGGCTGCATCATGGCGTCTTTATTTTCACTGCAGAAGCTGCTGAGTCTCGGCACTTTGCTTAGCTCCAATTCTTCTAAATTGGGAAAGTGTATGATATCTCCCTTGCTTGAGCCATCATTCATTACTATTGCTTCCATCGCAGGGCAATTTCTTATTATCAACTTTTGCAGCTGGGTGAGACATTTTGCAACAGAGTTGCAGAAGAGGTATCTTAAACCGGAGCATTCTTTAATTTCTAAACAGGTTAGTTTAGAAAAAGATGTCTGCTGGCTAAGCTGAATCTCACCCTGTGACATACTTGCTAGATGCTCCATTTCGT
LOC108200626	TGATTTGCACTGTAGATAAAACTCTTGAGCTTTGGTAGATCTTCAAGAATAACTTGTTTCAGTTGAGAGAGTGTAATAGTCTTCTTGTTCATGCCCGAAACCTCATCGATCCTAATATCCTCCACAATTTCTTCCAAATGAGCACACCTTGATATCTTCAAAGTTTCGAGACTTGTCAACTCTGAGAATGAAAAAAGATTAGAGAGTCCACAATCCTCAACTTCCACATACGTTAAAGATGGGACACGACACCCATAATTTGCTCCATGAATAATACTTTTCAGCTTGGGTAAATCCTTTAGAACAACTATCTCCAGGTGAGAGAGCGTGATAGTCTTGCTATTCATCCCAGACATTTCAAAATC
LOC108204961	GTAAATGATTCTTCATCTGCTGATCTGCTTAGTGGTAATGATATGTTATTTCTGCTGAAACTTAGATCTGCCGGTTGACATGTGATGCGACAATCTGGTAGCTTAGAGACAATATTATTAGTAAATTTGAATACTTTGACACACTAGTGGACTGTATTTGTATAAATGGTTTTGATCATGTAATCTAATATAGTGAATCTGGAGCCTACATAAACTATCATATGCTGATCTAAAGGCTTTTTAAGAGAAGCTCAGAACCATCAGCTAATCTCAATTGATTTTGTGGAAAGGAGACAGCTTTTCTAAATTATATTGCAAAATGCAAAGTCGTTATCTTTTGATATAAAATTGTCTCGACCGGAGGAACTGCATCTGCCTTGGAGGGTAATGGGGTGTCTG…
LOC108204245	TATCTTGTTCATTCTTTCTATTAAAAAGAATAAATAATCAGACCAAAATCTCAATTCTGATCATTCACTAGCAATAGTACTGGTTCAAGAAACTATAAGCCCAGATCAAGAATGGCTTATCTTCTCCAATTTCCAAACAATTTCAGGACCTTCTCTGTTTCAGCTTCCTCCAATGCTTCTCCAAGTGTGCCTCAGACAGGAGGGCCAGTGATTCTTGAACTTCCCCTGGATAAAATAAGAAGACCTCTTATGCGTACCCGATCGAATGATCAAGAAAAGGTTAAGGATCTTATGGATAGCATCGCGCAAATCGGTCTTCAAGTGCCTATTGATGTGCTCGAGGTAGATGGTGTCTACTATGGTTTCTCAGGCTGTCACAGGTATGAAGCCCATCAGCGC…
LOC108204242	CGTTTTGATATGCTAGTTTTCCCGATTTCAATTCGACATAGAATTTGATTTTACTATTCGAAACCCTTGAGCAGCGCCTAAAATAAAAAGTAAAACGACATCGATAATAGCCCTTCAGATTTCTTCTACTATCAATCTATCGCACTCTAATGGGCGACCGCGACGCCTATCGTGACCGCGAGAGAGATCGAGATCGAGATCGAGAGAGAGACACCAGAAAACGCGACCGTGACCGTGAGCGCGACCGAGACCGTAGCAAACGCTCGCACACGCCGGACCGGGCCAGATCGCGCCACGCCCGGTCGAGAACTCGCTCGCCGGACCGGTGGCGAAGCCGCTCCCGCTCTCCCGACCGGCACAGGTCTCGCCGCCATCGCTCTCCCTCCCCGGACCACTCAC…
LOC108203339	AAGAGAGAAAAAAAGGACTATTCACCCATGATGTTAATCTTGAACAAGCTTCTAGTAAAAGTGAACAGCTTTTGGGGAGCAAATAAGAATGGCCCCTTCCCTCATTCCTAAACCCCACCAATATTTACCATCAATGGCATCCAAGAATTTCTTGTATCTTTCTGCCCCATCTCTCTCCCATTGAAATCTCTCCTCTCTCTCCTTCACCCCTTCCCCCCCATCAGCAGTGTCATTGACCCAACTGAGTGCCAATCAACTGCATTATTGACTTTGACACCAAAAGGAAAGAAACAAATAAAGGTTTTGTGATCATTTGTTGATTGTGTTCATACTGCCACTATTTGATTCTTGATCAAGTGTTTCACTTGCACAAGCTTCTGGTTAGATAAAGATAGTTGA…
LOC108203339	AAGAGAGAAAAAAAGGACTATTCACCCATGATGTTAATCTTGAACAAGCTTCTAGTAAAAGTGAACAGCTTTTGGGGAGCAAATAAGAATGGCCCCTTCCCTCATTCCTAAACCCCACCAATATTTACCATCAATGGCATCCAAGAATTTCTTGTATCTTTCTGCCCCATCTCTCTCCCATTGAAATCTCTCCTCTCTCTCCTTCACCCCTTCCCCCCCATCAGCAGTGTCATTGACCCAACTGAGTGCCAATCAACTGCATTATTGACTTTGACACCAAAAGGAAAGAAACAAATAAAGGTTTTGTGATCATTTGTTGATTGTGTTCATACTGCCACTATTTGATTCTTGATCAAGTGTTTCACTTGCACAAGCTTCTGGTTAGATAAAGATAGTTGA…
LOC108203348	CCGAAATAAAGTTTGAACAAGACTCCTAGTCGACAAAATAACCAATAATTACGTACCACAAATCACACTCATTCTCCATCTCTGGTTTTGAGATATGGCGGTGTTGTTGGAAGACCTAGTGCGAGCAATTGAGCTTTGGTTGAAGCTACTGAAGAAACCGGAGCCTTATGTTGACCCGAATCTTGACCCGGTTTTACTAGTTCCGGGTATTGCTGGATCGATATTGAAAGCTGTTGATGACAAGGGGAAGGAGGAGCGTGTTTGGGTCCGGATTTTCGGGTCGGATCGTGAGTTTTGCACTAAGCTTTGGTCCAAGTTTGATCCTCAGTCAGGAAAATCTGTTTCTTTGGATCAGAAGACGAATATTGTGGTCCCTGAGGATAGAGATGGACTTTATGC…
LOC108195760	ATTCATATTTATGCATCATCACCAAGCCACCATTAGTAGGTAGTTGTTATCTATTACATATCATTCTGATTAGTAACAGCCACCCATGTAACTGAGTTGCATTTATTGATAGAGATGGTATTTAGGAGTAGTTCACTAGCATACTGGTTTTATTTAATTGTATTTGGGCACGATGACGACTCCAATGACAACCAGGCCACGCTTCCAGAAGCCATCAGTGTTCATCATCTGGTACTTGACTTCTCCACATCCACAGTTGTTCCGGGGGGTCTGAAACTCCCCGGCATTGATGGTAATGATTTGGTTTCTTGGCATTTGCATCATGTTCTCCTTATGCTCTTCCTTGCATCCCTCTGGAGTAGTCAGGCTAAAGGTCACTGGTTTGTCAATGTTAAAGTT…
LOC108211091	AGTTTTAAGTCATCGCAATTGAAAGGAAAACAGTACTAAGTTAATACTTGTTCTTTCAATCGAGATAATGGCTCAAGCAGTGAGGTGTCTTGATGGTCAGTCACTTTTGTGTCAGGCCAAGGCCGGCCAGAACATGCAGTGTCCCAGGAACCAGAACAATTCGAGTGTCATTGGGCATCTGGATGCAAGGGAACTGGAAATTACCTGGGGTTGCGACACTCGCTACT
LOC108205393	CTAACCTTGAAACCAATTTGATATATTCTCACTTAAAACATTAATCACAACATTTGACTCTCTCTCCTCTCTCTAGAACCCAAGAAAAACAAACCAGCGGTCAGTGCCCAAGAACAAAAAGAGTCTACAGCAACATTACACACACCTTTCATTCATACCCACCAAAACCAAGATCTGGGCTGCAAGAAAAATGGGCCAAAAGTCACTGATCTATGCATTTGTAGCAAGAGGGAGTGTCATATTAGCAGAGTACACAGAGTTTAGTGGCAACTTCAATTCTATTGCTTTTCAGTGTCTGCAGAAGCTGCCTTCTTCAAACAACAAGTTTACTTACAATTGTGATGGGCATACGTTCAATTATCTTGTTGATAATGGCTTCACTTATTGTGTGGTTGCCGA…
LOC108205393	CCCGTAGTTTAGAGTATAAAATTTTCAGGCATACATAACTTTTATGAACAGATAAACAACAATATTTTACAATCACAGTACAAATAAATCCCCGGATGTATGTACCAATACGAAATGTTGCCAACAGTTAGGGATTTAACATAGAGAAGAAAGCAACTTTTATCAGAGTACCTCAAACTTGAGCAGCTTTTCTATACTAAGCACGTTTTAGCAAGTTCTTGCAGCCCAAATGTCTGAAGCAAATTTAGGTGAATGGTTTCTTACGACATACAAAGTATACTAACACAAGTATATTCAAGCATTTAACTACAAAGCTTTGACAAAATCAGTACTTGGCTGCTTTTTCCAATGAGTTCTCCAGAGAGGTGCAGCTCAATTTCAACAGTTAAAACCATGACA…
LOC108214331	TGAAATAGAACAGAGTATACTACCTCTACATCCCTCGGTCTCACCTCTTTCAAATCTCATCTCAGTACCTTCACTCTCTTTTTTCACCTCAGCTCATTCTCGCTCAATCCTCATCTCACTTTTTCCACTCTCTCATGTGCATCTCAACCGACTGCAATCTTCATTTTCGAGGCAATTAGGGCTCTTTCTTGAGGCTTGAAGTTGGGGCTTTTACTTGGGAAATTCATTTAAGTCTTCGGGTAGCACCACTAATCTTCAACAAGGTGGAAATTCTCGTATTCCGTTTTCAATTAAGGATGGAAGATGATTTAGTGCATATTAGGTTTATCACAAGGGGAAATTTCAGAAAAATCGATATGTAGGTGGAGAAGAGCTAGCCCAGTATCATAATCCAGAGTT…
LOC108205146	AGGGTTTAAGACAGCCCAAATAACACTCTCTATAAAACTTTATTCATCCACCGCATCTCTCTCTCTCTCTCGAAGTCTCAACGAGACTTCTCCGCCGCCGCACTCCCCCTCTCTCAATCTCTCCGACTACTTCCCAAGGTCGGTAAGATGGTGTCGAAATTAAAGAAAACGACGTTGAGGAAACAGCAGAAAAAGAAGGTTAATAAGATTGCTGCTTCGGCTAAGAAGGCTGAGGCTGCTAGTACTGCTTCTGCTGCTGCAGATTTCTTGCCACTAGAAGGTGGTCCAGCTAGGAAGATTCCGGCGAGTGAGAAGAAGTCTGAAGACAAAGCTACGGTCTTGTATATTGGTCGAATTCCGCATGGGTTTTATGAGACTGAAATGGAAGGCTTTTTCAAA…
LOC108205146	ATTTTCTCAATTTCGAAGCCCAAACAACAAATTTTCAGGGTTTAACAGCCCAAATAACACTCTCATCCACCGCATCTCTCTCTCTCTCTCGAAGTCTCGACGAGACTTCTCCGACGCCGCACTCCCCCTCTTTCAATCTCTCCGACTACTTCCAAGGTCGGTAAGATGGTGTCGAAATTAAAGAAAACGACGTTGAGGAAACAGCAGAAAAAGAAGGTTAATAAGATTGCTGCTTCGGCTAAGAAGGCTGAGGCTGCTAGTACTGCTTCTGCTGCTGCAGATTTCTTGCCACTAGAAGGTGGTCCAGCTAGGAAGATTCCGGCGAGTGAGAAGAAGTCTGAAGACAAAGCTACGGTCTTGTATATTGGTCGAATTCCGCATGGGTTTTATGAGACTGAA…
LOC108205147	ATTTTCTCAATTTCGAAGCCCAAACAACAAATTTTCAGGGTTTAACAGCCCAAATAACACTCTCATCCACCGCATCTCTCTCTCTCTCTCGAAGTCTCGACGAGACTTCTCCGACGCCGCACTCCCCCTCTTTCAATCTCTCCGACTACTTCCAAGGTCGGTAAGATGGTGTCGAAATTAAAGACTAAAATATTCGATTTATTCACACAAAATATCTTATAAACTTTAAAAAATCCCAAATCAATATGTCAACCTATAAAATCCGATTTCAAATTTTTCAAACCCATGTTTAAGATAATTCATCTTTTAATCCAAATATACAGAGAAAACAAATTTCCATAACAAAAGATCCATCACATATAATCCAAACCACATCCCAACGATAAATCATCACAATTA…
LOC108197351	TTGCAGGAAGTACTCTGAGCTGGTGGCCTTATGCGCTTGCAGTATTGGTCATTTTCACTGTGGTGACTATGTATGCTGTGGTTGTAACTGAGGGTTGTAGAAAAATCAAATTACAATATTATGGATTTAAGCTAGCTTCTAGCTCAAGACAAGGCGAGGTGGAACCATATATCCCATTCAATATTAATCCATCCGGAATGCAGCCTATACTCACTACCACCTATCTCTTGGCAGTTCCGAGCATTCTTGCAGGTCTTCTTGGCTCGCCTGTTTGGGAATATATAAAACAGATGCTTAATCCTGAAACATCTACTGGAGCAGGGCCATGGGTTTACTATACAATTTATTCGTTCTTTGTCTTCGTATTCAACATATTTGACATTGCCAACATGCCAAAGG…
LOC108205036	TGTTGATAATAATAATGTGCACATAATATACTTGAACTGAAAAAAAAAACAATCCAAACACAAGTACCCACGTAAGCCTATAGTTCCTATGTTGACAGTACTTCTTTGCGGTTTTTTAAAACTTTAATCCCCATTTAGTCCCCAATCCCCATCTCTCGAGTTCTTTTCTTGACTGGCCATTTTACAGTTCTTGGATTGTGACTCAAACTTACAAAAACAAAGCACATTGACTAAACCTCACCATTTATGTGTTTATACAAGGTTTCTGTGTCTATAATTGATTGATACTGTTCATACTTTGAATATCTCAAATACCCATCTGTCATTTTTCTTGAAAATCTATTGGAGATAACTGGTGGATCAGGATGCTGGGTGGATAATGCTCAAATGGTTGATGTT…
LOC108203711	GAGGTAAGGTTCCAAGATCGAACCCAATCAAACAATAAATATTACTAATAATTTCCAAAATTAACCATATTCATCCCCCAGCTCGATTCTTAATGTTTTAGATCCAAATCATCATACAAAAACACACCGAAACACACACACATTGCTTGCTGAGATTATTAAAAATAATAATGGAACTGGGGAGATACTCACTAGACCTGAAAAGAAGCCCCAGAAAATCATTCACATCATCCCCACTCTCTAAATCAATCTCCGATGCTTCTACACAAAGCCTCTCCGCCATTCTCAACAACCCCACCGACGCCACGTGGACCGCCTGGTTCTCGTCCCCCGCCGTCTCCCCGCCCGATTTTCTCGCTGTTAACACGACCCGACCCGGGTCCGAACTCACCCGACCCG…
LOC108195106	CTCAAACAAATTAAAACAAAAACTGAAAACACCCAGATCTCTCCCTCTCCCTCTCTCCCTCTCTCTCCCGCATCTCTCAGTCTCTCTCTCCCGCATCTCTCACTTTCTCTCTCCCGTATCTCTTTTACGCATCTCTCCCATCTCGCTCTTTCATCTCTTTCTGTCATATCACTCATCTCTCTCATCTCACTCTTTCATCTCTCGAAACTGGAATTTGCGTAAGTTTGGGAAATGGTCCGACGACTTTATACAGGGAGCTCAGTTGCTTTTCTCGTACGTAGCTTGAATTTAATTGGTCGAACTGTAAATATAAGTGAATTAGTGTATTATAAAACTACGGGACTCTCATTTTCATGGATGTTTGAGGACACAGAACCGAGTGGAAGGAGCTTCTGGTAG…
LOC108201219	TCTTTAAAATTCATTCATACACATACAAGACATATGAAAGCTTTGCAAGTGAAAGCTTATCACAGAGCTAAACTACACATACAAAACACTTGTTTATGTATACAAACAGTATGAGCTTACATATCTCTTCCCACATTTCAACTCCTGTCCTAAAAACACAAGCACTTAACTCAGTACCCACTTGCTCAAACTTCATTTTTAATGCTTTTCCTGCAAAACCCATCTCCATTTTCACCAATTTATCTCTGAAAACATGTGCAATTTCTTCTACTCCCAATGGCACTGTTGTTAATTCAGTGAAAGTGGTAAAACCAGAAGTGGAAGTACAGAGTGACAACAAGCTGATAATACTGAATGAAAAATTGATGAAGCTTGGAATTGACAGTGGTCATTGTAATC…
LOC108204874	AGTGAGGAGAAGGTTTATTTGATAATACACATCATGACTGTTGAGGTGATTAAGGCTGAGGTTACCGTTTCGAATCAAGATGAGAAGGTGAAGGTTGTGGAGGAGGCAAAGGTGGAAGAAGAGGAGAAGAAGGATGAGGAGAAAATTGAGTGTGTGAAAGAGGAAGTTGAGGAGAAAGTGGAGGAGAAGGAGGGTGAGAAAGTTGAGGAGAAGGCTCAAGAGGAAGGGGAGGGATCGAAAAAGGCTGTGGAGAAGAAGGTTTTGAATGAGTGGGGATTGAAGATCAAAGGGGCTTTTAAGGGGCACAATTTGTTTAAGAAGAAGTCTAAGAAAGAAGTGGAAGAGAAGGAGAAGGCAGAGGAGAAAGCGTGGGAAGAATCAAAGCCCGAGGGAGAAGCC…
LOC108204874	CTAATGTACTTGCACTTATTACCAATATAAAACAGCCCCATTACATCACAGGTCTTATTACTACGGACTACTTCTTCTCTTAAACCCTCAAAACCCTAGTATTTTTTCTCAGCTTCTCTCGTCAAATCTTGCTCAAGTGAGGAGAAGGTTTATTTGATAATACACATCATGACTGTTGAGGTGATTAAGGCTGAGGTTACCGTTTCGAATCAAGATGAGAAGGTGAAGGTTGTGGAGGAGGCAAAGGTGGAAGAAGAGGAGAAGAAGGATGAGGAGAAAATTGAGTGTGTGAAAGAGGAAGTTGAGGAGAAAGTGGAGGAGAAGGAGGGTGAGAAAGTTGAGGAGAAGGCTCAAGAGGAAGGGGAGGGATCGAAAAAGGCTGTGGAGAAGAAGGTTTTG…
LOC108216879	ATCACCATCACCACCATCTCCTCCCTCNGCAACCAAATTGGCGCCAAGTTCTGGGAAGTCATCTGCGATGAGCATGCAATCAACCAGTCAGGATTCTACGATGGAACCACCGATCATCTTCAGCTCGAGAGGATCAACGTGTATTATAACGAAGCTAGTGGAGGGAGGTATGTGCCTAGAGCTGTGCTGGTGGACTTGGAGCCAGGGACTATGGATGCTGTGAGGACAGGGCCTTATGGCCAGATTTTTAGGCCGGATAACTTCGTTTTCGGGCAGTCGGGTGCGGGGAATAACTGGGCTAAAGGGCATTATACGGAGGGGGCAGAGCTGGTTGATTCTGTTCTTGATGTTGTTAGAAAAGAGGCTGAGAATTGTGATTGTCTTCAAGGATTCCAAGTA…
LOC108209361	CAAAATTTATACAAAATTTATAACGCCGTCGCGAAACTCGGCTTTATTCACCGGTTACAACAAAAGACTATCGACAGACAATCCCTGGAACCAAACACTCGCGGTGGCTTGGTGTTCGTCGGATCTAGCTCCACGACGCCGTTTCGCCCCTAATCACATTTGTCTGCGCAGAATGGACAGTGACTTGCCACTGGAAAAACTATCATTAGGGTCTAAAGATCATTATACCGGAATAACTCTTGGAACATCAGGAAAAGAACATGTGTAGTTTTACTTTCAGCTGGAAGTTTCAATCCTCCAACATATATGCATTTACGTCTTTTCGAGCTTGCGAGAGATGCACTAAATTCAGAGGGGTTCTCTGTTATTGGAGGATATATGTCGCCGGTAAATGATGCA…
LOC108197053	ACACATCCTTGTTATATCCATTCTTGATCTGCAATTATTAACCAGAAATTCATAACCAAATGATCAAGTATATACAAGCTGTAGTTTATGATTCTTGGTCATGGCTGTGGCTTTTGATCCACACAAACGACTTGGCCTATGCAGTTGCAGTCACAGCCACTGTCCTGCTTGTGTTTTCATTATTTTCTCGGATTTTTTTCAAGTCGAAAAAAATTAGCCCCCAATTGCCACCAGGTCCTAGAAGCTTTCCTTTAGTTGGGAACCTCTTGTCTCTTGATCCTGACCTGCACACATATTTTGCCAGCCTTGGTAGGACTTATGGTCCGATTGTGACGCTCTGGTTAGGCCATAAGGTTGGTATTGTGATCAACTCGCCTGTAATAGCACGCGAGGTGCTTA…
LOC108197053	CACATCCTTGTTATATCCATTCTTGATCTGCAATTATTAACCAGAAATTCATAACCAAATGATCAAGTATATACAAGCTGTAGTTTATGATTCTTGGTCATGGCTGTGGCTTTTGATCCACACAAACGACTTGGCCTATGCAGTTGCAGTCACAGCCACTGTCCTGCTTGTGTTTTCATTATTTTCTCGGATTTTTTTCAAGTCGAAAAAAATTAGCCCCCAATTGCCACCAGGTCCTAGAAGCTTTCCTTTAGTTGGGAACCTCTTGTCTCTTGATCCTGACCTGCACACATATTTTGCCAGCCTTGGTAGGACTTATGGTCCGATTGTGACGCTCTGGTTAGGCCATAAGGTTGGTATTGTGATCAACTCGCCTGTAATAGCACGCGAGGTGCTTAA…
LOC108197053	AAAAGATGTTCGGCCTTTCTATCTTTTATATCCTCCCCTGTTACAAACACATCCTTGTTATATCCATTCTTGATCTGCAATTATTAACCAGAAATTCATAACCAAATGATCAAGTATATACAAGCTGTAGTTTATGATTCTTGGTCATGGCTGTGGCTTTTGATCCACACAAACGACTTGGCCTATGCAGTTGCAGTCACAGCCACTGTCCTGCTTGTGTTTTCATTATTTTCTCGGATTTTTTTCAAGTCGAAAAAAATTAGCCCCCAATTGCCACCAGGTCCTAGAAGCTTTCCTTTAGTTGGGAACCTCTTGTCTCTTGATCCTGACCTGCACACATATTTTGCCAGCCTTGGTAGGACTTATGGTCCGATTGTGACGCTCTGGTTAGGCCATAAG…
LOC108216898	ACTTCCTAAGATTTTTATTTTATTTTTTTAATTTTGTGCAAAAAGATACCGTTTGCCGCATGTGATGCTAAATTTTTGTACCTGCTTTGTCTGCATTCTAAAAGATGTTCGGCCTTTCTATCTTTTATATCCTCCCCTGTTACAAACACATCCTTGTTATATCCATTCTTGATCTGCAATTATTAACCAGAAATTCATAACCAAATGATCAAGTATATACAAGCTGTAGTTTATGATTCTTGGTCATGGCTGTGGCTTTTGATCCACACAAACGACTTGGCCTATGCAGTTGCAGTCACAGCCACTGTCCTGCTTGTGTTTTCATTATTTTCTCGGATTTTTTTCAAGTCGAAAAAAATTAGCCCCCAATTGCCACCAGGTCCTAGAAGCTTTCCTTTA…
LOC108211802	GTTAGTGTGTTAAAAGTTGATCTTTGTGGATGAGCATTTAAGTCTTCTTTTCAGAGCCAAGTTATATGGATAATACCATTTGAAGAAGTCTTTTAGGCGTTTGGCCCCATAATCTTACATCAGTCTCTTCAGCTAATCTCTATAACCAAATATTTCAGAAAACACAAACCACTATGTCTGATGCATGGTCATGGTGGTTGCTTATGTTCAAAACGAGTGACTTCGCCTATGCGATTACAGTAACAGCCACGGTCCTGCTAGTCATTTCATTAATTATTTTGATATCTACCAAGACAAAAAAGATAAGCCCACCATTGCCACCAGGCCCCAAAAGCTTGCCTTTAGTTGGTAACCTCCTTTCCCTTGACCCTGACCTCCACATATATTTTACAACCCTTG…
LOC108204912	AAATCGTTTATAGTTTACGGTTTGTTGTTTTAGGAAACAAACGTGGGGAAGATTGACTCAACTCGATGATTATTATTGGTTGATAGATAACTTAAACTAGTACAATTGCAGACAAAGAAATATAGTTGTGATAGAAGCCTGATGCCCTGATCGTTTAGAAAGCTTATCAATCATGAGTTCCACCAGAAGTTGGTTTCAGAAGTTTCAGCATAGAGAGAAGAACAAGGATAAATCCGGGACTCCTACGAAGAGAGAAATCGAGGAGACGACAAATTCTCCTATGGAGGATGAGCCACCATCCAGTGCTACACAACAGAAGGTAGCTGCTGCAAAGGAGTACATAGAGAACCATTACAAAGCTCAAATGCAGTGTTTGCAAGATAGAAAAGAGAGGCGCTG…
LOC108204912	AAATCGTTTATAGTTTACGGTTTGTTGTTTTAGGAAACAAACGTGGGGAAGATTGACTCAACTCGATGATTATTATTGGTTGATAGATAACTTAAACTAGTACAAGTACGTACAGATACAACTAAATTTATGTTCTTGTATCTATAGATTTCATGTTTTGTGTGTGTTCTGTCTGATGATCAATCCAACTGCACTCTCTCCAGTTGCAGACAAAGAAATATAGTTGTGATAGAAGCCTGATGCCCTGATCGTTTAGAAAGCTTATCAATCATGAGTTCCACCAGAAGTTGGTTTCAGAAGTTTCAGCATAGAGAGAAGAACAAGGATAAATCCGGGACTCCTACGAAGAGAGAAATCGAGGAGACGACAAATTCTCCTATGGAGGATGAGCCACCATCC…
LOC108204912	ATGTACTGTCTTATTATGATTTTGGTGGGAATTTCTTGAAAAAGTTGAGAGCTTTATGTTCAAGAATCTTGATCAACTAATGGGTCAACTTTTGTTTCGAGTTCTTGATTTGTGATTATGTTGGAGTGTTGTGATTTGTGTTTATATGTTTAATGAAGGAGAGATTGAGTTTTTTTTGATGATTTTTGTTGTCTTGGTGTGTAAAGTTGTGTTCTTGAAGCATAATTAAGCCTTGTGATTACACAATTTCGAAAGCAAACCAAGAAAAGGACTTGTAACTCTTTATTGGGGTGATAGTGGTTATCTTTTTTGTAGTTGAAGCAAAGCAATAAAGTATCACTAGCTATGTTAGGTAGTAATCCTAGTGGATTTGTCAAGCATAACTTCCCAAAAGTCCGG…
LOC108211311	ATGATAAAGCAAGCCAATTTTGAGACAAGCATCTCACATTTGAGGCAAAATCAAAGCATGTCAATGCTCACCACTCTGCAGCTGACACCAAAACACTCAAATCTCCACAAAACCAAGCCTTTAACTACAATTCCATCTTGCAACACTCACTTCATAAATAACTTCCCATTCATATGTAACACCAAGAATGCTACATCAGCAGCTCTGATTGGAACTGGCCTTGCAATAACAGCCCTTGTGGGCCCAGCCACTGCAGGAGAGTTGGCATTGATAGAGCCCTCAAATGCACTCTCCTTGCCCACTTGGGCCATCCATGTCTCCAGTGTTGCTGAATGGGTTATTGCAATGGCATTAGTTTGGCAATATGGGGAAAAATCTGGCTATGAATCTTGGAAAGGG…
LOC108211311	TCAGGGGTAAGTGTAAACTATGAAAGAAGAGTATCAGTGTGTGTATTGATTAATTTACAGAAGAATACTAGACCCTGTGACTTGCAATAAGAAAATATTGACAGAGATGGTTAGAAGGCAGCAATACATTCCCTTGGGCTTCTTCTGGATGGATATGCATGGGGGTTTCTTCTCTTGTAATCATGACTCCCCTTCATCATTACACTTCTTGAATCTAACAATCTCCTCTCCCTCTCTCTCAGAGCCTACAGGCCACCATGTAATATACCACATTCACCCATAACTAACCATAACATTCAGCTATTTATACCAATCCCTCTACAAGTTCTAATTCTACTCAATCCTTGTAATATATACTTCCTATTCGATAAAATTGAACGATGGGAAGCGCAAAACAGC…
LOC108204647	GTACAGCTTCTGGGTTTGGGCCGGATGAAGGGGGCTTGACCCGGAAAGAATCTAGGGCACGTCTTTCGGGTTTATCAATTCAATTCACTCGGCACTCACTCCCCTTCTGCTCCATCATCTCTTCGCCAAAAGGCAAAAGAGAATGTCCCCTGATACAGGAAAAGGGTATACATCTGTAGCCGATTCATCTCTGACTGAGACAAAGCATGATAAGAGGAATTTAGATTTTTCAGAAAGCCCAAAGTACAAAGTGGATAGACATGCCTATAGCTTTAAGAAACAAGAGCAAGGGTATTCATGCGAGCAGGTGGGAACCTCTGGTGCTAAGAAACATAGAACGATTGGTACAAGATATTTCATCATTAAGAGTTTGAATCATGAGAATATCCAATTATCAAT…
LOC108210004	TAATAGAACATTTCATTTCTATCAAACAAACCTAACCTAAACAGTAAAGAGAAAGAAGAAAGATCTATATTCTCAGAAAGCTACTTTCACTGTATATGATATTATATACAGTATTTATATTTATTCCTGTAGCTAGGGTTTTAATTCTCCTCCTTTCCCCATTTGTCTATATATTTCTTGCTCTCATTTCAGATCTAGCTACTTCTGCAAGTAGTAAATCAGATCTTTTTGTCTGCTTGATTGAGTTTCCCTTTTTAGACTGTCAAGTAGTCAACTTTCATATCTTCTAGTCCTATTCTATAATTGGAAATGTACTTGTCTATTTGATATATATCTTTGTTTGGTAATTAGTTTGTCTGCTAATTAATCAAGATTCAAGGTAGATATCTTGTTTAATTT…
LOC108204718	ATAGACTTTGTGTTGACGGACAAATCAAGAAAACAAAGCCAGTTTTTGACTCACTCTAACCGATGATGCATTAATAAATCTTGATGCTCTCATATGTCTTTGTAGATCACAATATTAATTTATTAAACCCACTTTAAGATTGATTATTTAATAATAATTCTTGCATATTCAGAGCCATCACTCCATTCAACCTGAGCCTGCTGGTCATCATAGAGTACAATTTTGCAATTCCACATTTTTCACTCTTTGCAGACTTTTACTCATTCAATTCCTTAGTGATAACAAAATCCACCTACATGTTTTCCATCTAGAAGAAGAGTAGTTGAGACTTGAGACCCTTCTTTCTTTCTTTATTAGATTTCCAAGAATTTGTTTTGGATCATCTGGGCTTTTGTTATT…
LOC108205323	CAAAAATCCGATCCGCAGATCTGCAAGTGACACCTCCCACGTCACCCCACACGCATTTACTACAACTGCTGTAATAATTGGGCCGTAAAATCTCTACTCATAAACACACATGTGTCAACTCTACTCTGGAAACACATAATCCCCAAACATAGGAATCAAGAACCTCAATTCCCTCAGATCCAATCACCCCAACCTCAACCATGTCTCTCTCAGTCAACGGCTCCTCGCCCAAACTCAACTTCTTAATCTACGGCCGCACAGGCTGGATCGGTGGGCTCCTCGGCAAGCTCTGCGAATCCCAAAACATAAGCTACTCCTACGGCTCCGGTCGTCTCGAGAACCGCGCCTCGATCTTATCCGACATTGATACCATCAAACCCACCCATGTTTTTAATGCTG…
LOC108194985	TACACATAAAACGTTGGATTTATTAATATAAAATTGAGAATTTGAAATGAACCCTCAAATCATGTCATCTGGAAGAACAAATGCGCCTAGGACGCGAATGCAGAGATGGTGGGATCAAGTTCGAACTGAACCATATCAGCTTCATCCATGCTAACTAGTGCTTCAATACCTGTCCCGCACTTAGTGTCCAAAAGAAATACGATCTCCAAATGCATCTCCGGGATAGTCACCCATTCGGGTTTTCCCCACCCGAATTCGGTTTCATACAAAGGCATCCGACACAACGTTGTGAAAATCCGAACATCCGTTTCATCGCTCTCCATGTCTTCTTGAATGATGTTGAAATTCTTAGCTGCTTCCAGGAACAATCCATCGGCAGTCGAGATTTCCGAGCAATTT…
LOC108204841	AAGACGCGCTAAGTTGGTCAAACAAGATCGGCCATAGCTTCTTCTCTCAATTACTTATTCAAACCCTAACTCATAAGCCGTTTTGGGTTTTGCTTATAGGCTGCATCGCACAGTTGTAGTAGGTATTTTGATAAGCAGCACTTGGAGACGAGGGAGTTAGAGTGCGATAAATATTTAAATATATTTTGATTGATTTGAATGCAAATGCCGGAAGAAGAGTTGATACAACTAAAATTCCGAATTTATGATGGAACGGATATTGGTCCATTTCGATATTCACCCTCGTCAACTGTGGCTACTCTCAAGGACAGAGTCGTTTCCGATTGGCCTAAAGGTCATGGAGTCGACGAACTATGCTTTAATACTTAAAGACACAGCCGCTCCATGTCTGGCTCTAAA…
LOC108204841	AAGACGCGCTAAGTTGGTCAAACAAGATCGGCCATAGCTTCTTCTCTCAATTACTTATTCAAACCCTAACTCATAAGCCGTTTTGGGTTTTGCTTATAGGCTGCATCGCACAGTAGGTATTTTGATAAGCAGCACTTGGAGACGAGGGAGTTAGAGTGCGATAAATATTTAAATATATTTTGATTGATTTGAATGCAAATGCCGGAAGAAGAGTTGATACAACTAAAATTCCGAATTTATGATGGAACGGATATTGGTCCATTTCGATATTCACCCTCGTCAACTGTGGCTACTCTCAAGGACAGAGTCGTTTCCGATTGGCCTAAAGATAAAAAAATTGCACCCAAGGTTGCAAATGATGTCAAATTGATAAGTAGTGGGAAAATTTTGGAAAACAGC…
LOC108204841	AAGACGCGCTAAGTTGGTCAAACAAGATCGGCCATAGCTTCTTCTCTCAATTACTTATTCAAACCCTAACTCATAAGCCGTTTTGGGTTTTGCTTATAGGCTGCATCGCACAGTTGTAGTAGGTATTTTGATAAGCAGCACTTGGAGACGAGGGAGTTAGAGTGCGATAAATATTTAAATATATTTTGATTGATTTGAATGCAAATGCCGGAAGAAGAGTTGATACAACTAAAATTCCGAATTTATGATGGAACGGATATTGGTCCATTTCGATATTCACCCTCGTCAACTGTGGCTACTCTCAAGGACAGAGTCGTTTCCGATTGGCCTAAAGGTCATGGAGTCGACGAACTATGCTTTAATACTTAAAGACACAGCCGCTCCATATAAAAAAATTGC…
LOC108204841	TTTGAAGAAAAAAAAAAAAAAAAAAAAAAAAAAAAAAAAAAAAAAAAAAAAAAAAAAAAAAAAAAAAAAAAAGCGTGAGCAGCAGAAACGAAGACGCGCTAAGTTGGTCAAACAAGATCGGCCATAGCTTCTTCTCTCAATTACTTATTCAAACCCTAACTCATAAGCCGTTTTGGGTTTTGCTTATAGGCTGCATCGCACAGGTATTTTGATAAGCAGCACTTGGAGACGAGGGAGTTAGAGTGCGATAAATATTTAAATATATTTTGATTGATTTGAATGCAAATGCCGGAAGAAGAGTTGATACAACTAAAATTCCGAATTTATGATGGAACGGATATTGGTCCATTTCGATATTCACCCTCGTCAACTGTGGCTACTCTCAAGGACAGAGTCGTT…
LOC108204841	TTTGAAGAAAAAAAAAAAAAAAAAAAAAAAAAAAAAAAAAAAAAAAAAAAAAAAAAAAAAAAAAAAAAAAAAGCGTGAGCAGCAGAAACGAAGACGCGCTAAGTTGGTCAAACAAGATCGGCCATAGCTTCTTCTCTCAATTACTTATTCAAACCCTAACTCATAAGCCGTTTTGGGTTTTGCTTATAGGCTGCATCGCACAGTTGTAGTAGGTATTTTGATAAGCAGCACTTGGAGACGAGGGAGTTAGAGTGCGATAAATATTTAAATATATTTTGATTGATTTGAATGCAAATGCCGGAAGAAGAGTTGATACAACTAAAATTCCGAATTTATGATGGAACGGATATTGGTCCATTTCGATATTCACCCTCGTCAACTGTGGCTACTCTCAAGGAC…
LOC108204841	AAGACGCGCTAAGTTGGTCAAACAAGATCGGCCATAGCTTCTTCTCTCAATTACTTATTCAAACCCTAACTCATAAGCCGTTTTGGGTTTTGCTTATAGGCTGCATCGCACAGGTATTTTGATAAGCAGCACTTGGAGACGAGGGAGTTAGAGTGCGATAAATATTTAAATATATTTTGATTGATTTGAATGCAAATGCCGGAAGAAGAGTTGATACAACTAAAATTCCGAATTTATGATGGAACGGATATTGGTCCATTTCGATATTCACCCTCGTCAACTGTGGCTACTCTCAAGGACAGAGTCGTTTCCGATTGGCCTAAAGGTCATGGAGTCGACGAACTATGCTTTAATACTTAAAGACACAGCCGCTCCATGTCTGGCTCTAAATTCTTATAA…
LOC108204841	AAGACGCGCTAAGTTGGTCAAACAAGATCGGCCATAGCTTCTTCTCTCAATTACTTATTCAAACCCTAACTCATAAGCCGTTTTGGGTTTTGCTTATAGGCTGCATCGCACAGTAGGTATTTTGATAAGCAGCACTTGGAGACGAGGGAGTTAGAGTGCGATAAATATTTAAATATATTTTGATTGATTTGAATGCAAATGCCGGAAGAAGAGTTGATACAACTAAAATTCCGAATTTATGATGGAACGGATATTGGTCCATTTCGATATTCACCCTCGTCAACTGTGGCTACTCTCAAGGACAGAGTCGTTTCCGATTGGCCTAAAGGTCATGGAGTCGACGAACTATGCTTTAATACTTAAAGACACAGCCGCTCCATGTCTGGCTCTAAATTCTTA…
LOC108204422	TATCTTGTAAAACCCGTACGCCACGCACGTCTTGGCAGTTAAAAGAATAATTACACAAAGTGACGAGAGTATATTCAGATTCTCAAATCTGGATCTCATATCTTCAACCACTTAAGACAAGAGGGGTCAATAAGTCTCTTGTTTTCAACCCAACCCAAACTTGTTCTTACAAACACTTTCTGTGTTGTTGATAACCCAACATGGGTACTGAAAGAACCTCAGATATAGAGATATCCGAGCCCTTGATTCAACATGATGATCATACTGCCAAGATCAAGGAGCTTGATCTAGAAATCATCCCAGAATGGCAAGATCAGATTACGATCAGAGGGTTGGTTGTGAGTGCTGTATTGGGTACTCTGTTTTGTATAATCACTCATAAGCTTAATCTCACAGTTG…
LOC108213329	TTACGCTTTTGACATTAATTATTAAAGTACTTCTTTCTTTATGATATTTATATATCTTGCAAGTATATAAATGTTTTAGCCCAACCTGTTGTAAGATATCATTACATGTAGCGCAAGAATTTCTATCACAAAGTGTCAAAGACTGTTGCTAATTTGCTATCGAATTGCTTAGACACCTAAACAATTCAAGGACTGGTTGATTCTTACTTACTTTGCTAACTTATTATTGAGCAACCGACAACTTCTAAACAATTAAGAAATATCCATAAGAATCTATATTCACCAGGGAACTTGGACATATAGCTTCCATACACCCCTCTTCATTATGAAACACCTTACTGAAAGCTAAACCTGTAAAAAACTTGCAAGGGCCTCCGTTGTACCCTATTGACTGAAGTC…
LOC108204297	AAAGGAATAGTTAATAGATGAAATAGGGAGAATTTAGTTAGGCCCCACACCTCATCCTCCTATCAGTGAGTCCGAGTCGGGACTGAAGCAAACCAACCATCTCTCTCTCTCTCTCTCTCCTCTCTCAATAGCCGTCGGATCGATTGAATTACAGGCGTCGCTCTCTCATCGCTCCTAAAAAAAGATATAGAATAGGTAAATAATTAATGGAGCTGCAAATTAAGGTAGCTCAGGCGGTTCAAGTACTGAATCACGATGCCGAGTCATGTAACCGAGTTGCTGCCAATCAGTGGCTCGTTCAGTTCCAAAACACGGATGCTGCTTGGGAAGTCGCTTCTGCGATTCTCACTTGCGATCATCATCTTCCTTTCGTCTCCGATTTCGAAGCCGAGTTCTTCG…
LOC108204297	AAAGGAATAGTTAATAGATGAAATAGGGAGAATTTAGTTAGGCCCCACACCTCATCCTCCTATCAGTGAGTCCGAGTCGGGACTGAAGCAAACCAACCATCTCTCTCTCTCTCTCTCTCCTCTCTCAATAGCCGTCGGATCGATTGAATTACAGGCGTCGCTCTCTCATCGCTCCTAAAAAAAGATATAGAATAGGTAAATAATTAATGGAGCTGCAAATTAAGGTAGCTCAGGCGGTTCAAGTACTGAATCACGATGCCGAGTCATGTAACCGAGTTGCTGCCAATCAGTGGCTCGTTCAGTTCCAAAACACGGATGCTGCTTGGGAAGTCGCTTCTGCGATTCTCACTTGCGATCATCATCTTCCTTTCGTCTCCGATTTCGAAGCCGAGTTCTTCG…
LOC108201257	AACAAATCATCAAAGTTTGGTAAAATTGTGCGAAGAGAATAATATAGAGGTAGAGGTCGAAAGCGAGGGAATTGATTAAGAAATGTTGAAGGAATCAGAACAGAATTGGAGAAAACAAGTGAATTGCAATGTTGAGCGTCTCCATTCTCTGTTGTTTGCGTCGGAATTAGCTCTCCAGAAGCGAGATTTCAGTTGCGCTCAAACCCTGTGTCTCCGTCTCATCGGTTTTCTCGATTCCCGCGTCGCAAACGACGTGGATGAGTCGTTCGTCCTCCCTATTCGCCGCCAAGCCATGTCGAATCTCCTCGCTGCCACTACTTCCCTCGTTCCCATCTCCGATAGCCAAGCATTTGAACAAGCTGCCACAAGTCCAGGCATTATTTTTCGCAAGCAACAACA…
LOC108217334	TACATAGAATTTGAATGGATGAGAGAAAGAGCGAGCAAACAGCTCCAGAGGGAGTGATATTGATCGATAGTCATGGCGTTAAAACTTGGGCCTTGCCACCACCAGTTGATCTCAAACCCCCACCTTTCATTCCGTACAAAAACCCCTGCTCTCACCGTCAAGGCTGCTGTTAAGAAAAGCCCTAAACGCCTCAAATATTCTTCCCCTTCCTTTACCAAGGATGTAGATGAATTGCTGTACGTTGAGGTTGATCCCTCCTTCTTGTCAGTATGGTCTTATTTGTTCACTGCAATTGTTTGTATTCGTAGATATGCTATTGTTTGTGATTTGAAATGCAACTCCGCTATTGACCGTCTTCGTAGAATAAAAAATATCCAAGCTTCAAAGCCCCTCAGTACC…
LOC108217334	TACATAGAATTTGAATGGATGAGAGAAAGAGCGAGCAAACAGCTCCAGAGGGAGTGATATTGATCGATAGTCATGGCGTTAAAACTTGGGCCTTGCCACCACCAGTTGATCTCAAACCCCCACCTTTCATTCCGTACAAAAACCCCTGCTCTCACCGTCAAGGCTGCTGTTAAGAAAAGCCCTAAACGCCTCAAATATTCTTCCCCTTCCTTTACCAAGGATGTAGATGAATTGCTGTACGTTGAGGTTGATCCCTCCTTCTTGTCAGTATGGTCTTATTTGTTCACTGCAATTGTTTGTATTCGTAGATATGCTATTGTTTGTGATTTGAAATGCAACTCCGCTATTGACCGTCTTCGTAGAATAAAAAATATCCAAGCTTCAAAGCCCCTCAGTACC…
LOC108205273	TGAGACTGACGACATCATTGATTGTGGTAGTTGGCCAGCAGATGCTCCTGATAAGCAGTCTTACTGTTGAGCAATCTTTCATCACTAATTTGAAAGCTCCATTTTCCCTTTTATCTTCACTATTATTCTTTTTGATATGTTCGTAGGGCAAATACCATGGATGATTTCTGGCTTGTTATTGTTCTACTATCATACATGTGCTTAACAGCAATGGTGGCCTCAACGAAATCTCCAGGAATTCTTGTTCACTTTAATCAAGTTCCGCCATATCATTCCAGGTTCAGTAGTGCCATTTTCAAGTACTCAGTCATTAGATTGAATAGCTCTTATCCATGTAGCATGAATGATTGTTCCTTCATCTGCGAGGTCGATGGCCATAGTTTGGTATCGTGTCCAGCT…
LOC108204715	AAAAACAGAAGAAAATACCCCCAAATTAGTTTGGAAGAGAAAAGCGGGGAACGCGAGTACGGGTGAAGAAACACGAAACAACTCAAAGATTTTGCAGATTGTTTACAATTGCATTCTATTTAATACTCCAAGCTATCAGTCCATCACCTTTGCTATTTCTGAAGCAGACAGAGTTTCCGACATTAATTCTAGTATTCGACCTCACTCGAACCTCAATTCCTAGAGAGACAGAGTTAGAGTCTCGGTGACTGCCTCAATCGCTGAACACTCAACAATCAGCATCAACGGTTCTGAAAAGTAAAAACTGTAACACCAACAGATGAAGTGGTGGAGTTTGCCTCAGCAACAAGCACATCAAAATCCAGCAACAGATTAAGTGTTGCTTGTCAAGCAAAGAGA…
LOC108204886	AAAAACGACTTTTATGTCAATTTGCCACTGTTCACTTCTTCTCTTCCCTTTCTCACATTTCTTCAACCCATCTTTCCCAATTAACCCAAAATGTCACTAAATTTCCAGTCTTTATCTCTTCAATCCGCCCAATTTTCACCCCCAAACTTGACACACAGACACCCATTTACACACACATCAAAACCCAGATACACTTTCACCTGTATCTCCATGACCCGACCCGCGAGAAAAACGGGTTACAAGACAGAACTCATGTCTGATTCGGCAGAGTTGGTCAGGACACTACTGAGGAACATTAATGATAAAAGGCCACTGACAACTACCTTGGATAAGTATGTCAAGGTTGTCAGAACTGAACACTGTTTTCTTCTGTTTGAGCAGCTTGGGAAGAGTCAAAAG…
LOC108210139	TTTTTTTTTTTTTTCATTCTGGCATATTTGTCATCCTATTGATTTGGTTTTTATCTCTATTCTGACAGGAAAAAAATATGCCAACATGATCATTGTTTTAGGAAGAGGCGATTCTCAACAGATTGTAGTAGAAATAATATATAAAATTTTGCTAATTATATCCACAAAGAGGTATTGTATGAAGCTGGATATGTCCCTTCAAATTCTGAAAAGCGTCCTTTGGGGGTTATCATCTCTATTATTCAAATTGCTTTCCATGCAACTCCAGAGTTTACTTGCTCACAAGGTGCTGTAGAGGAACTTCAACTGTGCTTTTATGAGTATTTTAAGATATGAATAGGGTGGCGGAAATGGGGAATATTGCTCTAGGCTTGGATTCTTAATAAGGAGAAAAAAATT…
LOC108204442	GTGGATCTTAGTGATTTAGGGAATAACATACTGTTGGAGTTGATTATTTTTCCATATTCCTCATATTTTGGTTTAAGACTCCAAATAGAGAAGCTGCTGGAGTTGCTCTTAGAGTTGGAGCTGTCCAAAGGCGACAAGGCTTCACTTGAATCAAAATCTAAGAAGACTCAAACTCATCTCATCTACGCACTTCTCAAAAGCGTCACCTTCATTCTCTTGTCCACAACTCATCTCATCACATCAATATTTTCAATCATCAGCTCCGTGCATACAGCCGGAAAGTGACGTCACTGTATACGCCAACATGCAATGATGCGTAAGTTTACGGTTGGTGCGTAAAATAACCGAAGTGAAGTGACTTGGTGCGCATATTTAGTTATCATCATAATCCAGATCGGC…
LOC108204286	CACAACTTCTACCCCTCTTTACCACCGAGCAACCAAAACATAACAAGAGACGGAGATAAATATAAGCTACACACACCCAGACAAACACCAAAGCCCTAGGTCGTCTAATTAGGGCTCAATTACTCGTAACATCTAATGGTTTATTTGTGCTTTCAGGCCCCCGAATTTATGGCGTAGACTCAGATTTGTGCCCTAGTTTCTTCGTTTTTATAGCCTTTGTGTTGATTTCTTTGCTTAATTTGTTTTCTGTTATATCTAATTCTTGTTTGATTCTCGTAGTCCTAGGCCTTCGTGTTTCGGAGACTCGCATTTCAAAGCTTTTCGACATCTCGGCCTGCTGAGTTTTGTGGAAAGTGAAAGTTGGAACTTAAGATGTCGTCGTATCCTGTTCTGTATGAT…
LOC108201126	TCTCTCTCTCTCTCTCTCTCTCTCTCTCTCTCTCTCTCGTGTAGACATACATTATATAGATATACACACTCTACCATCTCTCTCTCTCTCTCTCTCTCTCTCTCTCTCTCTCTCTCTCTCTCTCTCTCTCTCTCTCTCTCTCTCTCTCTCTCTCTCTCTCTCTCTCTCCGTATATACGCACAACAATATCTCTATATCATCCATATTGTTGTGAGTCTTGAGCTTCAACTATCTTTTCTTCGCTTCTTTCCTACGAAATGCATTGACAAGATCTCCCTCCCTCCCCTTTAGCTCTCTCTCTCTCTCTGCGTTTATACTGTCCCAATTGTCAGCTACCTACTTCATTCAATCTGTTCTCCAGATCTTCCTAGCTTATCTCAATCCTCACTTAACTCATTC…
LOC108203227	AAGATGTGTATAGTAATGTAATAAGTTGGCATTAGAGTACTCATTCACTCACTTATTTTGTTATCAAAGTCATACTTTATGTTTGTGCATTATTGATGATATAACATCAACCACCATAATAGTGTTTTGAAGTTGACCCTCTACATTTGATATGCTATTTATACTTCTAGTTTCCCCCCATCAAAATTACTTAACAAATCAGAGAAGCTCCAGTCTTTGTAATGCATTGAGGTGAATAGATAGGCACTAAACATATTTTCATGTTACATTGCATGAAACATCAAGAAAATTTTGTTGATGAATATGGAAGGAAGTGACATATTTAGAGTGAGTAGTGCAAGAATAAGCAGTTCTAACATATGGAGAAGTAGTGGCAGAGATATATTTTCGCGAACTTCT…
LOC108203209	CAAACACCAAGAACTAAAACTAAACAGTCTCCTCTTGAATCTATGTGCATCAGAAAAACACACACACACGCACTTACTTGTTGTAGCATAATCTAGTACTGCTAGTCCGATGAAAAAGATGATGCGTGCATCTGTAATATCAATAATATATATACTATCTATATCATCATCATGGGTTGCTGCTGATGAGTTTGTAAGAGATGGGAAAGTGTTGGAGCTTGATGACTCCAATTTCGACAAGGCCATCTCTACTTTTGATTACATCTTCGTTGATTTCTATGCTCCTTGGTGTGGCCACTGCAAGCATCTTGCTCCCCAGGTCCATCTTTTCTTGTGTACTTTTCTATCTTCAAGTTTTTAGTTTGTATGTGTAGATTTGGTTTGAAGTGCTTTTTGCTG…
LOC108208636	TAGTTTAGTACTCCGTTGGTTCTTAATCAACGTACTCACTACAAGAAAAACGACTAATTTCCAGTGCAGTTTAAGTATATCAGTGTATCAGTAGGGGTCTGTATATGTGTGTGCTGTTCTGATTTTAATACAGTGGAGCCATGAGTATGGAAGGTACATTACATAGTACATAATGCCAAAGAAAGTAGAGGCTGAAGGACGAAAAAGAGCCCCCAAGGGACACTTTGTGGTGTATGTAGGAAGCGAAATGACAAGGTTTGTCGTTCCTATATCATACTTGAAGAACCCGTTACTCCAAGAGCTTCTGCATAAGGCTGCTGAAGATTATGGCTATGATCACCAGTCTCCTATTGTTCTTCCTTGCGATGAATCTTCCTTCCGGGGGCTCGTCTCCTCCTT…
LOC108208651	GTTAAAGCTCAGATCGTATCCAGTGAACAAGGGCTTTTTGCTTTTTCTTTCAGTTACGATTTACTTCAAAACCCATATATATATTGGATAGTGCTGGTCAGCATTAGGCTTATTTACAGTTACAGGACGTATAAAATCTATGTATTGAGATATGGGTGGGAAATCAAAAGCTATTCAGAAGGGAAAGGAGAAAAAGTTTGCTCCAACATGGGTAGAAAAGAAAGCAATGGTTGACAGGGAAGAAGATGCTATAGAAGAAGAGATTCAAGAGCAAGAAGATTGGATTGCTATGGTGAAAGGGATGGACAACTTAGAAATGAAGAACTACTTGAGTAGCAGGCCTGATCATCTAAAGGCTGAAAACTTGGAAAAATGTGAACCAAGCAAAAGAACGAGAAA…
LOC108225137	GATTTATAAGCAAAGAAAATAGAAATAAAAAAAGACTCACACTTGTAAACATTCTCTCGACTTCACCTCACAAACACTCTGAGCGACGAAAACAAGAGAGAGATAGATGGCGAGATAAAGAGAAATGGCGATAAGAAGAAGATGAGAGAGAGTGAAGAAAGCACCCCGTAGAGGGGGTGCTCCCACAGGTGCTCATTTTGATCCATATGGCCCCAGGCATGTTCCTGGTTATGAGTCCAGATCTGGAAGGCAATATGTTATCGCATTTTGTTTTCGAATATAATGTTTGCCATGTTTGTATTTTAATAAGACTTAAGGTTTTTTGAAATTTCTGATCATCTAAATAATTTTAACTGTTAGATACAAAAGAGATTTGCATAAATTATGGAACAGATACAG…
LOC108225137	GATTTATAAGCAAAGAAAATAGAAATAAAAAAAGACTCACACTTGTAAACATTCTCTCGACTTCACCTCACAAACACTCTGAGCGACGAAAACAAGAGAGAGATAGATGGCGAGATAAAGAGAAATGGCGATAAGAAGAAGATGAGAGAGAGTGAAGAAAGCACCCCGTAGAGGGGGTGCTCCCACAGGTGCTCATTTTGATCCATATGGCCCCAGGCATGTTCCTGGTTATGAGTCCAGATCTGGAAGGCAATATGTTATCGCATTTTGTTTTCGAATATAATGTTTGCCATGTTTGTATTTTAATAAGACTTAAGGTTTTTTGAAATTTCTGATCATCTAAATAATTTTAACTGTTAGATACAAAAGAGATTTGCATAAATTATGGAACAGATACAG…
LOC108206215	AAAGTAATCTGTCAGGAACTTTGGATCATCCAAGTTCTAGCGGGTACTGACCCATTGACCCGTTGCACAGTAGAACTAAGAACAGCTTCGATTCGCGTTGGATCCGACAGAAAGCGGGCGCTCCACATATTTTTTTGAAATCGTCGGTGGGTTATTTTTTCCCGTCATTTCAGGAACTGTTAACTCCACGACTTTCCAATCCTGTGAGGCTGCTGGATTAATCATACTGCAGTTCTTCTCTATACGAATATAGATCATATTGGTGGCCATGGAAAATGGACATCATATCACCGTCACTGTTTGTATCGTTCCATCTATGGACCACGGAGATCATGTTGTTCTCATCTCCAAGCGACATTGTAATGGTGCATTCTAAGTGTTAGGAATTCTACTACTGCG…
LOC108206215	AAAGTAATCTGTCAGGAACTTTGGATCATCCAAGTTCTAGCGGGTACTGACCCATTGACCCGTTGCACAGTAGAACTAAGAACAGCTTCGATTCGCGTTGGATCCGACAGAAAGCGGGCGCTCCACATATTTTTTTGAAATCGTCGGTGGGTTATTTTTTCCCGTCATTTCAGGAACTGTTAACTCCACGACTTTCCAATCCTGTGAGGCTGCTGGATTAATCATACTGCAGTTCTTCTCTATACGAATATAGATCATATTGGTGGCCATGGAAAATGGGCTTCAAAGTGCCTCCACTTTGTTATACTTATCAATTTTTACAGTCTCCGTTCTTGATTTTAAACTTTGTGCAGACATCATATCACCGTCACTGTTTGTATCGTTCCATCTATGGACCAC…
LOC108206215	AAAGTAATCTGTCAGGAACTTTGGATCATCCAAGTTCTAGCGGGTACTGACCCATTGACCCGTTGCACAGTAGAACTAAGAACAGCTTCGATTCGCGTTGGATCCGACAGAAAGCGGGCGCTCCACATATTTTTTTGAAATCGTCGGTGGGTTATTTTTTCCCGTCATTTCAGGAACTGTTAACTCCACGACTTTCCAATCCTGTGAGGCTGCTGGATTAATCATACTGCAGTTCTTCTCTATACGAATATAGATCATATTGGTGGCCATGGAAAATGGGTCTGACCCATACCCACTTTCAATTCATTTTGTACCATTCATACATCATATCACCGTCACTGTTTGTATCGTTCCATCTATGGACCACGGAGATCATGTTGTTCTCATCTCCAAGCGACA…
LOC108206215	AAAGTAATCTGTCAGGAACTTTGGATCATCCAAGTTCTAGCGGGTACTGACCCATTGACCCGTTGCACAGTAGAACTAAGAACAGCTTCGATTCGCGTTGGATCCGACAGAAAGCGGGCGCTCCACATATTTTTTTGAAATCGTCGGTGGGTTATTTTTTCCCGTCATTTCAGGAACTGTTAACTCCACGACTTTCCAATCCTGTGAGGCTGCTGGATTAATCATACTGCAGTTCTTCTCTATACGAATATAGATCATATTGGTGGCCATGGAAAATGGGTCTGACCCATACCCACTTTCAATTCATTTTGTACCATTCATACATCATATCACCGTCACTGTTTGTATCGTTCCATCTATGGACCACGGAGATCATGTTGTTCTCATCTCCAAGCGACA…
LOC108204796	TGATAATAAAAAAAGATATCCTCTTAAAAAAATGTATACTTGATGTAGAGCCCACTTTAAGGTCCCAGTCACGCTCGTGCCAGGTGGCTTCCTTGCGTCTCCTAATTCTCTTTCTTACCCGTACGCATCTCCTGAGCGAGAGAGAGAGAGAGAGAGCTGTTTATAATAATACACACAAGAAAGAGCAGCTCACACAACATAACTTGAAGAAAGATCATAGATAAAATGGTTGCTGGTGGGGGGATGAAGATAAGTGGTGGTGGAGCGATCAATGAATGGAAAGACATTCCAATGGAGCTTCTGCTGCGGATTGTGTCGCTCGTTGATGATCGAACAGTGATTGTTACTTCGGGTGTTTGTAGTGGCTGGAGAGATGCTGTTTGCTGGGGATTAACTCGG…
LOC108204796	TGATAATAAAAAAAGATATCCTCTTAAAAAAATGTATACTTGATGTAGAGCCCACTTTAAGGTCCCAGTCACGCTCGTGCCAGGTGGCTTCCTTGCGTCTCCTAATTCTCTTTCTTACCCGTACGCATCTCCTGAGCGAGAGAGAGAGAGAGAGAGCTGTTTATAATAATACACACAAGAAAGAGCAGCTCACACAACATAACTTGAAGAAAGATCATAGAATCAAGAAGTGCATTTTGTTATCAGATAAAATGGTTGCTGGTGGGGGGATGAAGATAAGTGGTGGTGGAGCGATCAATGAATGGAAAGACATTCCAATGGAGCTTCTGCTGCGGATTGTGTCGCTCGTTGATGATCGAACAGTGATTGTTACTTCGGGTGTTTGTAGTGGCTGGAGAG…
LOC108208782	ATTTATATCACTTCTTCGCTAAACCCAAATCCAAAAACCTAAAAAAATCAGTGTTTTGCGTTTCAGATAATATTACATCAAGAACTGAAAAAGTCTCTGCGGAAGTGTATATTAATATATAATCATGGATGTTGATTCACAACCTACGATGGAGGAAACTATATTAGTTGGTGATGATCTGATGACTGGTCCAGCATCGCCAGTCATTCCACCAGAAATTGCATCGCATGTGCTTGAAGGTGTTGATATATGCGATGGAAAATTGAGGAATTTGTTTCTATGCTTGCAAATTAATGATATAGAGCCATTTTGTCAAGATGAAATTGCTCTTTACAAGCAGTGTTCACAGAAAAGGGATATGGAACTAAGACAAAGGCTCCGAGATAGTGAGCATAAATT…
LOC108214727	TTGTGATTTGACCATAAAGCACTCCACCGACTCGCTGCAAATACTCAACTCTGCAACACACACGATACATTACACTAATACACCTGGGATCAGGCGGTGTTGCTGATGGAATGGCGAGGGTTTTTATTGTCCTTGTGTTTGTTTGTTAGTCTGGTTGAGTCCTTATGTGTTCCAGAGAGTCTCTGGTTGGTTAGTTCAAATGGAGAGCATACTTCAGTTTACAGCTGGACGATATGTAGTGCTAGCGTTTTTGTTCTCGTTGCACTTGTTCTATCTATGTACCTCGTCTTTCAGCATTTAGCAGCTTACAATCAGCCTGAGGAGCAGAAATTTATGATCGGACTCATTTTGATGGTTCCTGTCTACGCACTAGAATCGGTATGTGCAAACCTTGTTGAT…
LOC108204944	CTTTACATGGTGTTTTCTTCTTGGACTTGTTGTTTTCTTAACTTGTACTCTTTTACCATCCTAACCTCACAAACCAATTCTTTAGTGTCAAGAATCTAGAAAGATTGTATCTTTTTAGTTTTTAATTGACTTTAGGTGCAAAATAGTCAAAACCTTAGCTTGTGTTCTTGATTTAAACCCAATTCTCTTTGTGTTAATCTTCTCATATATCTGCAGGTTTTGAGTTTTAAGATAAATCATATAGCTTCTGGGAGCTATCAGCTAATCTGATTCTGAAGATCACCAGTACCTGAGAGAAGAAATATTTTCTTCAGCTGAGAGTACGTGCGAATAAGGTTTTTTCCCACTTCATGTTGTGTAATTCTATTATTCTTGTGATTATGTATACTTGAATTTTCT…
LOC108205007	AAAAAAAATAGATGAGTTAGATATATAGATCAATCATTGCATATACATACACACCGTCGATACATGCCTACATATATAATCTTCACGACACACACACAATACGGTTGCGCCAAAAGCGGTTAAATCGAAATGAACGTCGGAAATATCGCCTCCAGCCCGGCCGACCAATCGCCGGAAAAAGGCAAACCCATCGGAGTATCCTCCACTCCGGCGAACAAATCGCCGGGAAGTGACGCGATCAAACTACCGCCTTCGCTTGCCGCGAAGAATGACGTTCCGATAAAATCGCCGTTGCCGCGGTTGCAGACGCAGTCGGAGGCGACGGCGTCGGCGGGAGAAGATGCTCCGGCGCTTCCGCCGCATATAAGGAATGCTATGTTCCCGACTGCTGATCCTGGA…
LOC108204830	GAAAGGTGAAAAATAAGGTGGTAGTAACTCCTACAAATATACCCACGTTATTACATTCATACACGTCTTTTCAGTTCTCCCACTAGTCCACAATTTCTGCCATACCCAGTTAGTAACTTTCCTTATTTTTATCTCTAAACATCCTTATCACATTGTATCTGTTGTACTTTCCACAATTCTGTAAATCATGGTATGGGTTATTGATTCATGTAATTGGGTTTCTGTTTGGGGGTGATCATAGGTTTTGGGGCAGGATGTCTGCAGCAGTTTGTGCTGAGAGGGCAACCAGTGACAAACTGAGTGGTCCAGATTGGGCAATGAATATTGAGATATGTGATATTATCAACACGGATCCGGGGCAAGCAAGAAATGCTATAAGGATACTCAAGAAGCGGCTAG…
LOC108204830	GAAAGGTGAAAAATAAGGTGGTAGTAACTCCTACAAATATACCCACGTTATTACATTCATACACGTCTTTTCAGTTCTCCCACTAGTCCACAATTTCTGCCATACCCAGTTAGTAACTTTCCTTATTTTTATCTCTAAACATCCTTATCACATTGTATCTGTTGTACTTTCCACAATTCTGTAAATCAGTTTTGGGGCAGGATGTCTGCAGCAGTTTGTGCTGAGAGGGCAACCAGTGACAAACTGAGTGGTCCAGATTGGGCAATGAATATTGAGATATGTGATATTATCAACACGGATCCGGGGCAAGCAAGAAATGCTATAAGGATACTCAAGAAGCGGCTAGGGAGTAAAAATCCAAAAAGACAGCTCCTTGCTCTTTTTGTACTAGAAACTCTC…
LOC108204830	GGCAATGAATACTTGTACCATGGATATTATGCACTTGCTTTACCAAGGTAAAATTTAACAAAGAGAGCTCCTCCAATTCGAAGGGAGAGAAATACCAAGTAAACAAACAAACAAAAAAAAAGATGACTTCAATTGTGCATTCCTAATATTATAACTTCATTGGATATCCTAATATCACAAGGACAAGGAAGATGGCTGGTTTTACGATTAAGGAGTCTTAAGGAGTGACCTGTACTATCATGCACAACATGTACCAACTAGTTTCAATGTGACCTGTTAGGGTTGGAAGACGATGAAGACTTGGCTTTTGCAAAATTAACCAGATCTTTGAAAAGTGCATCTTCGGATCCCTCATGCTTCTTTGGAGTGGTTGAATTGATGGAAAGATTATTTGCTTGC…
LOC108204830	CATGGATATTATGCACTTGCTTTACCAAGGTAAAATTTAACAAAGAGAGCTCCTCCAATTCGAAGGGAGAGAAATACCAAGTAAACAAACAAACAAAAAAAAAGATGACTTCAATTGTGCATTCCTAATATTATAACTTCATTGGATATCCTAATATCACAAGGACAAGGAAGATGGCTGGTTTTACGATTAAGGAGTCTTAAGGAGTGACCTGTACTATCATGCACAACATGTACCAACTAGTTTCAATGTGACCTGTTAGGGTTGGAAGACGATGAAGACTTGGCTTTTGCAAAATTAACCAGATCTTTGAAAAGTGCATCTTCGGATCCCTCATGCTTCTTTGGAGTGGTTGAATTGATGGAAAGATTATTTGCTTGCTCAACTAAGCTGTCATAG…
LOC108204830	GAAAGGTGAAAAATAAGGTGGTAGTAACTCCTACAAATATACCCACGTTATTACATTCATACACGTCTTTTCAGTTCTCCCACTAGTCCACAATTTCTGCCATACCCAGTTAGTAACTTTCCTTATTTTTATCTCTAAACATCCTTATCACATTGTATCTGTTGTACTTTCCACAATTCTGTAAATCAGTTAAGTTTTTTTCTTTTTTTTTGGTTTTGGGGCAGGATGTCTGCAGCAGTTTGTGCTGAGAGGGCAACCAGTGACAAACTGAGTGGTCCAGATTGGGCAATGAATATTGAGATATGTGATATTATCAACACGGATCCGGGTGTAAACATCCTTACACTGGATTGGACTTTCAGGCAAGCAAGAAATGCTATAAGGATACTCAAGAAGCGG…
LOC108204830	GAAAGGTGAAAAATAAGGTGGTAGTAACTCCTACAAATATACCCACGTTATTACATTCATACACGTCTTTTCAGTTCTCCCACTAGTCCACAATTTCTGCCATACCCAGTTAGTAACTTTCCTTATTTTTATCTCTAAACATCCTTATCACATTGTATCTGTTGTACTTTCCACAATTCTGTAAATCAGTTAAGTTTTTTTCTTTTTTTTTGGTTTTGGGGCAGGATGTCTGCAGCAGTTTGTGCTGAGAGGGCAACCAGTGACAAACTGAGTGGTCCAGATTGGGCAATGAATATTGAGATATGTGATATTATCAACACGGATCCGGGGCAAGCAAGAAATGCTATAAGGATACTCAAGAAGCGGCTAGGGAGTAAAAATCCAAAAAGACAGCTCCTT…
LOC108218384	ATGAGAATATTTGGATTTGGACCATTTACATTGGATGCTGCTACAGAATTACGAACAAATGGAAATACCAAGGATACTATGAGTGGTACTGCTGTATTGGATGAAGTTGTCAAGAAGAAAAAGAAAAAGAGAAGCGAAAGTGAAAAAGGTGTTGTTGCATACCAACCTGATACTGTAGAGAAAGAATTCGACAACTTTAAGAAGAAATCTGAGGAGCTTTCAGATGTTAATGATTTGATCGAATCTGCTAAAGTGAAGGGGAAAAGTTCCAAGAAGAGAAAAAGATTGGTTTCTGATGAAAATGAGATCCAGTCCAACAGTAAGGAAGCAGAAGAAGTTAAACCAAAAAACGGCCAAAAGGCCTGAAAAAAAACAAAGAAAGATAAGAGGACGGTAGGT…
LOC108218384	ATGAGAATATTTGGATTTGGACCATTTACATTGGATGCTGCTACAGAATTACGAACAAATGGAAATACCAAGGATACTATGAGTGGTACTGCTGTATTGGATGAAGTTGTCAAGAAGAAAAAGAAAAAGAGAAGCGAAAGTGAAAAAGGTGTTGTTGCATACCAACCTGATACTGTAGAGAAAGAATTCGACAACTTTAAGAAGAAATCTGAGGAGCTTTCAGATGTTAATGATTTGATCGAATCTGCTAAAGTGAAGGGGAAAAGTTCCAAGAAGAGAAAAAGATTGGTTTCTGATGAAAATGAGATCCAGTCCAACAGTAAGGAAGCAGAAGAAGTTAAACCAAAAAACGGCCAAAAGGCCTGAAAAAAAACAAAGAAAGATAAGAGGACGGTAGGT…
LOC108204383	AACGCCAAACCTTGCATTTCCATTTCTTTACCACTTCACTAACTACACTTATTTCACAATCCTATCCACTACCCCCCCCTCTCTCTCTCTCTCAAAAAGCACAACAATTATAGCTAGTTCAAACGTTTTCCACACCACTTTCTCTCTCCACATATACAAACACCATCTCTCCCTCAACCGCCTCGGATTCTCTCTCCGATCACCACCTGCTATCTCTCTACTTAAATTTACTCGCAACAACTAACTCTACACGTCTCCATAGCTATACATACAGACACACACACATAGTATACTTACACACACACACACAATACTGTTGCTATGGATTTGATTGAAGGCGTCGGAGAGAGCTCATCGCCGCCGAGAACTGTTCCGAGCTTCGGAGGCTACGATATACGA…
LOC108205358	TCATGTTCTTGAGTGTAGATATACACCAGCTTTTGGCCTCTTCTGCCTTTCTTCTGTAGGTGTTTCATTATAAAAAATTGAACTGGCCCCATCAAATCCTCCCCATTCATTGAATCTGCATTCTCATTTTTTTTCATCCGTACAATCACTTAAATATATAATACTATATGATATTAATATATCACAGAATTTTCTTATTTTCTCCATCTTCTCTGAAGCTCTGTACTTTTTGGTCTTCACCACACTCTTGGAGCTTACTTTCAAGAACTTGGCCTTGATTGTTTCTCAGCTGTCAACTTTTGTGTGCTTTTACTGATCAAGGAGATGAACTAGGTTTTGATTGTTTGTGCATTGTAGATTGAATAACTATATGGAGTTTTGGATTACATGGATTGGAGA…
LOC108203076	TAACATACATACACAGATCTATCTTAATCGCTGTCCCTTTACCCTTACGCGCTAATCTCTCTCTCTCTCTCTCTCACACACACACACAAACACACACATTATATGTACACTTAGATCTTTCATCTTCAACCTCAGTAGTTGGCACTTGTCAAAGTACTTTGAGCTGGGTTTCCATCAACTACCAAGAAAAGAATAAAGATTCAATCTTTTCTTGTTAATTATATTTACCAATTGGGTTTTTAAGGGTGAGTGAAATCTTGCATTCCCTTCATGGGTCTTGATCTTTGTGGCAAAAAGATTGGATCTTGAAGGGTTTTAGTGTGTGTTTGTGTGTGACATTTGGGGGCTAAATGGATACTAAAGGAAGACTTGTTGCTGGTTCTCACAACAGAAATGAGT…
LOC108218515	CGACTCAAAATAAGTAAAATAAGTAGAAGTTATCTTGAGAAGGGAAAGTTAAATAAGAAAGTGAGAGAAAGCTGTACTCTCTTGTTCTGGGTTTTCATCTCCCTCTCAGAGATGGATTTTCATGATATGAAAAGAAGGGAACTTCAGAAGTTATGCAAGGAACATAATATACCTGCAAATTTGAGTAATTCGGATATGGCTGAAAAGCTTTCATCTATGTTCAAGGTTCAAGAAAATGTAGAGGAAAGGCCCATGAGGAAAACAAGGTCATGTTTGAAGAATTCTGATGAAATGTTGAGTGAAAATGAGTCTGATGTTTTGAAGAGGAAATCGAAGAAAGTTAGGTTTAGTCCTCAGAATGATGTGTTTCAGCTTGGGGGGAAAAATGGAAGGGCTTCT…
LOC108218515	CGACTCAAAATAAGTAAAATAAGTAGAAGTTATCTTGAGAAGGGAAAGTTAAATAAGAAAGTGAGAGAAAGCTGTACTCTCTTGTTCTGGGTTTTCATCTCCCTCTCAGAGATGGATTTTCATGATATGAAAAGAAGGGAACTTCAGAAGTTATGCAAGGAACATAATATACCTGCAAATTTGAGTAATTCGGATATGGCTGAAAAGCTTTCATCTATGTTCAAGGTTCAAGAAAATGTAGAGGAAAGGCCCATGAGGAAAACAAGGTCATGTTTGAAGAATTCTGATGAAATGTTGAGTGAAAATGAGTCTGATGTTTTGAAGAGGAAATCGAAGAAAGTTAGGTTTAGTCCTCAGAATGATGTGTTTCAGCTTGGGGGGAAAAATGGAAGGGCTTCT…
LOC108218562	GTTGGGAGCTCTGGTGCAAACAAAGTACATGCTAATTGTCATGGATACAATAACAGATTATTACATTTTTCTCGCAAGCAAAATCCAGAATTAAAACTTAGAAAGCAGCCTGAAAAGGTTTCGGTGGATCAACCAGAAAAATATCAAGAAGTTCCTCAACTGTTGTGTACTTGTACTCTGGGTATAACTCAACAACGTCCAATCATCCTCTTTCAGATCATAAGCCATCTCCTCGCCTTTTACGAAAAGGCTGTGAAGTATGGCCATTGGTACATTATC
LOC108204251	TTCTCGACTTCTCGACTATCCACTATCCAGTATCCGGGTAACGCTTGATTAATGAAACATTAGTTTCACTGCTAGCCTAATCACCTACCCAATTTCATGGCCAGTTACACAATCTCATCCAAAGAACTGGACGATTAGATATCAACAAACCCTCCTGTTCGATTTTATACCCCCAACCAGGAATCTTACGTATTCTTGCTGCTTTGATTATATATGGACATGGGAATATAGAGGAGTGTGTGAATTTGTTTTTTAGAAGTTTTCCCAAAACACTGCAACCAGTGGCAAGTGGATGAGCACATCAGCATTAAAACTTGATCTGTCAATCAAAAGAATATTAAAATATTTAAGGATGTCAAATGATGCAGTGATACAAAATAGGGGCTTGAGGAAGTGGAG…
LOC108204251	TTCTCGACTTCTCGACTATCCACTATCCAGTATCCGGGTAACGCTTGATTAATGAAACATTAGTTTCACTGCTAGCCTAATCACCTACCCAATTTCATGGCCAGTTACACAATCTCATCCAAAGAACTGGACGATTAGATATCAACAAACCCTCCTGTTCGATTTTATACCCCCAACCAGGAATCTTACGTATTCTTGCTGCTTTGATTATATATGGACATGGGAATATAGAGAAGTTTTCCCAAAACACTGCAACCAGTGGCAAGTGGATGAGCACATCAGCATTAAAACTTGATCTGTCAATCAAAAGAATATTAAAATATTTAAGGATGTCAAATGATGCAGTGATACAAAATAGGGGCTTGAGGAAGTGGAGATCTGTTTTATTTGTGCAGAGTG…
LOC108204251	TTCTCGACTTCTCGACTATCCACTATCCAGTATCCGGGTAACGCTTGATTAATGAAACATTAGTTTCACTGCTAGCCTAATCACCTACCCAATTTCATGGCCAGTTACACAATCTCATCCAAAGAACTGGACGATTAGATATCAACAAACCCTCCTGTTCGATTTTATACCCCCAACCAGGAATCTTACGTATTCTTGCTGCTTTGATTATATATGGACATGGGAATATAGAGGAGTGTGTGAATTTGTTTTTTAGAAGTTTTCCCAAAACACTGCAACCAGTGGCAAGTGGATGAGCACATCAGCATTAAAACTTGATCTGTCAATCAAAAGAATATTAAAATATTTAAGGATGTCAAATGATGCAGTGATACAAAATAGGGGCTTGAGGAAGTGGAG…
LOC108204251	TTCTCGACTTCTCGACTATCCACTATCCAGTATCCGGGTAACGCTTGATTAATGAAACATTAGTTTCACTGCTAGCCTAATCACCTACCCAATTTCATGGCCAGTTACACAATCTCATCCAAAGAACTGGACGATTAGATATCAACAAACCCTCCTGTTCGATTTTATACCCCCAACCAGGAATCTTACGTATTCTTGCTGCTTTGATTATATATGGACATGGGAATATAGAGTTGTCAAAGTATCATGTCGTCAAGCTCCAGTACTATACATAATCGACTCATCTTTAACCCATAGGAGTGTGTGAATTTGTTTTTTAGAAGTTTTCCCAAAACACTGCAACCAGTGGCAAGTGGATGAGCACATCAGCATTAAAACTTGATCTGTCAATCAAAAGAA…
LOC108193989	AATGCAATTTCTGAACATGCAGTATAAAATATATCGACATTAGTATGGGTTAAAACTTATGTTATGCCGCCTATCCTCCGCAGAAAAATAACACAAATCGTCTACAATGGCTACTCCTCTGCAATACTATAATTCTATACCGCCAGTGGCCAAGACATTTGCAGTCACCTGTGTAATGGTCTCTGGGGCACAGTATCTTGGTCTCATCAGTCCCTGGACCATATCTCTGTCTTACGCAGATGTGTTTCGACGATTTCAGGTTTGGAGGCTCATTACAAATTTCGTGTTCCTTGGTCCGTATTCATTCGGTTTTGCTTTTCGCCTCTTGATCATATTACGAAATGGAGTTCAGTTAGAGAGAGGGCCCTTTGCCAAGAGGACAGCAGATTATGTATGGAT…
LOC108205097	CCTATCTTAAAACCCTACAAAACCCCTAATTGGTAAAACCCTAATCTCTCTCTCTCTCTCTCTCCTTCACACTGAAAAACACACACTGTGTGTGAAAATGCCGCTAGGCGAAAGAGCCGGCGACAAAAGCGACTCCAGATACTGCGGCGTCGAGACTGAATTCAACGATGACATTCCTCAGCTCCTCTCACTCAACATTAACGGCGGTTTCGATTTCGTCGTCGCCACTCTGATGGATCCTGCTTACAGGCCTAGCTTAAAGAGTGACGAGGGTAATAAGTCTTGTGGCGTTCTTCCTTTTGCGGGATCTGACTTAGTTTTAAGTCCTTCTCAGTGGAGCAGTCATGTCGTTGGCAGGATTAGCTTGTGGATAGACTTGGACTCCGAAGATGAGTTACT…
LOC108204643	TGTCAGTGGTGTACTTGGGTTTAAAAGTAGTTAGTTTCAGAAATGTATGTATAAACATCCCGTTTTTTTAGGCTGATTCATCATTCGACCATCGGATCCAGTGTTGTGCGTTGCTGCACAAGTTGTAATCTTTCTCAGGACTCAGATCTTGGTCAAGGGCAGGTGGCTTTGTTGTCTGTGGGCAAGTGAGTGAATTGAATCAAGGACTAATTTGTGATGCGTGGATGATCAGAACTGATGTTATTGGCAGTGGAAGGAGGTGGATTTTTTTCTGCTTCAGCTTCTGGGTATAGTAAGGGTCTTGCCCTTCTTCTCTTGGGTCAGAAGACTGAAGAAAAACCCATGAGAGTTACGCCGTGGAGTCACTATCAGCTAGTGGACCAAGAAACTGATCCTAAT…
LOC108204643	TGTCAGTGGTGTACTTGGGTTTAAAAGTAGTTAGTTTCAGAAATGTATGTATAAACATCCCGTTTTTTTAGGCTGATTCATCATTCGACCATCGGATCCAGTGTTGTGCGTTGCTGCACAAGTTGTAATCTTTCTCAGGACTCAGATCTGTGGCTTTGTTGTCTGTGGGCAAGTGAGTGAATTGAATCAAGGACTAATTTGTGATGCGTGGATGATCAGAACTGATGTTATTGGCAGTGGAAGGAGGTGGATTTTTTTCTGCTTCAGCTTCTGGGTATAGTAAGGGTCTTGCCCTTCTTCTCTTGGGTCAGAAGACTGAAGAAAAACCCATGAGAGTTACGCCGTGGAGTCACTATCAGCTAGTGGACCAAGAAACTGATCCTAATCTCCAGCTGGCTT…
LOC108202572	AGAGGAAAATATCATAGCCACGTTGGCAGATTGCACAACTAGAGGAAGAGAGAGAGGCCAGTTAAAGATCTCATCTCTCTCCTCTCATCTCTCTCTATCTCTCCCAAACTGCTTTGCTTAAAAAACACTCTCAAAACTCATTTTACAGACAGTAAACCTAAGCCCAAAAACTCAAGAACATAAACTCCATCTCATCCACAAAGATTCTCAGCCTTATATTTCTTCACCTAGCAGCGGTAACTGAAGCCGACTGAAGCTTGCAGCTTCCAACGTGTTGGTTTTACGAGCTTTCCCCTGAAAAAAGTAACAATGGCTACCTCTTGTGAGAGGTGGATTGATGGTCTTCAGTTCTCCTCAGTGTTTTGGCCGCCTCCACATGACAAACATCAAAAGAAGGCT…
LOC108201325	GAGTATACTTTATCATGCACGACAGTTTTACTTAGTATCGTTTCTGCATGTTTATTCACACAGGGGCTTAGAAGACTTGAGATGTATAGTCTTTGTACAGAGGGTTATAACGGCGAATGTACTTTGTCGCCTTTTGAATGTTTTGCTTCCTAGCCTTAGTGGATGGAAAACAGAATATATGGCAGGCAGCAATACTCGTCTTCAGTTACAGAGTAGGAAGGCCCAAAATAAAATTGTTGAAGAATTTCGCAAGGGCACGGTTAACATCATTGTTGCAACATCAATTCTTGAAGAAGGGCTGGATGTTCAGAGCTGCAATCTGGTTGTACGGTTTGACCCATCAGCTACAGTCTGCAGTTTTATTCAGTCACGAGGTCGGGCTAGAATGCAGAACTCAGA…
LOC108201317	GAGTATACTTTATCATGCACGACAGTTTTACTTAGTATCGTTTCTGCATGTTTATTCACACAGGGGCTTAGAAGACTTGAGATGTATAGTCTTTGTACAGAGGGTTATAACGGCGAATGTACTTTGTCGCCTTTTGAATGTTTTGCTTCCTAGCCTTAGTGGATGGAAAACAGAATATATGGCAGGCAGCAATACTCGTCTTCAGTTACAGAGTAGGAAGGCCCAAAATAAAATTGTTGAAGAATTTCGCAAGGGCACGGTTAACATCATTGTTGCAACATCAATTCTTGAAGAAGGGCTGGATGTTCAGAGCTGCAATCTGGTTGTACGGTTTGACCCATCAGCTACAGTCTGCAGTTTTATTCAGTCACGAGGTCGGGCTAGAATGCAGAACTCAGA…
LOC108201317	GGTTAACATCATTGTTGCAACATCAATTCTTGAAGAAGGGCTGGATGTTCAGAGCTGCAATCTGGTTGTACGGTTTGACCCATCAGCTACAGTCTGCAGTTTTATTCAGTCACGAGGTCGGGCTAGAATGCAGAACTCAGAGTTTTTACTATTGGTGGAAAGGTGAGTCGTAATTTGTTTCCATATCATTAATCATTATCATCTATAATATCGTTACATGCAAGGTGACGAGTTTCTGAACTTTGTCGTACAAAGTTTGTGGTTGCTCTGAATATTATTCTCTTTTTGTGACAAATGTAGTGGAGACAATTCTTCTTTTACTCGAGTAGACAGCTACCTTGCTAGTGGACAAGTAATGAGGCAGGAATCCTTGCGCCATGCTGCAGTGCCTTGTCAACC…
LOC108201317	GAGTATACTTTATCATGCACGACAGTTTTACTTAGTATCGTTTCTGCATGTTTATTCACACAGGGGCTTAGAAGACTTGAGATGTATAGTCTTTGTACAGAGGGTTATAACGGCGAATGTACTTTGTCGCCTTTTGAATGTTTTGCTTCCTAGCCTTAGTGGATGGAAAACAGAATATATGGCAGGCAGCAATACTCGTCTTCAGTTACAGAGTAGGAAGGCCCAAAATAAAATTGTTGAAGAATTTCGCAAGGGCACGGTTAACATCATTGTTGCAACATCAATTCTTGAAGAAGGGCTGGATGTTCAGAGCTGCAATCTGGTTGTACGGTTTGACCCATCAGCTACAGTCTGCAGTTTTATTCAGTCACGAGGTCGGGCTAGAATGCAGAACTCAGA…
LOC108202235	GGGAAGCCAATCACAGCTTGCGCTGAAGAACAGTGTCACAGTCTACCCTAAGTCATCCTCACTGACTGCCCACAATCACAACTCCCTCTATTCAATACGGTGCTTTACAATCTCACTTAACTTTCCAAATTTCGAGGAATGGATATGAATGAGAAAATAGAGATATTGAAATCAGAATTTCAAAAGCTGTCAAAGGATGGACAAGCTTGGGTGCAACATTTATCAGTGGAGATGAATAAACAAGAGTGGTTTCAGAAGTTGCCCCCTTTTATTCAAAACATACCTCCACTTCAACTCTATGTTGCACTTGTGGTCTTGTTCCTCACCATGTTTTTCTTCTTTATAGTTCGGTTATTCAACCGCAAGACATCTAATACCATATTACTCACTGGGCTAAGT…
LOC108202160	CAGCTTGCGCTGAAGAACAGTGTCACAGTCTACCCTAAGTCATCCTCACTGACTGCCCACAATCACAACTCCCTCTATTCAATACGGTGCTTTACAATCTCACTTAACTTTCCAAATTTCGAGTGCCGCATTCCGCTGCTTCACTCCCTAACTCAACCCCGCTGTCTAAAATTCTCTCCTCTCTGTTTCGCTCGATTTCAACCCCTTCTTCGCTCTCCTTCCCACTACTCGGATTCAATCGATTGGCCACTGCTTGGATTTGGGTTCTCTCGAATTAGGGATTCAATCAATTGGCCACTGCTCGGATTCGGGTTCTCTCGAATTAGGGACTCAATCGATAGGCTGCTGAGTTCAATCGAGAGGCTGCTGGGTTCAATTGAGAGGCTTTTGGGTTCAATC…
LOC108202160	ACCCTAAGTCATCCTCACTGACTGCCCACAATCACAACTCCCTCTATTCAATACGGTGCTTTACAATCTCACTTAACTTTCCAAATTTCGAGTAAATGCCAAGTACAGATAGAAACATCGATAAGGAGGAGTATTGGAAAATTATTCACATTCCAGACAAGGCACCTATTCCACCACATTTGCAACCCACAGTGAATGCCTATGCTTCAGTAATTAATCCAAAACATGCTAACACACTTATAAGGAGGTTGAATAAGATTTCTCCACTCGAAGATCTTCGCCATGTGAAGCGCATATGCAAGAAGTGTGTTGAAGGAAACGTTCAGTTATTGGTGATATTATGTCTGGCTTCTGATGGGAGTGACCAGTCGGAAAACATACCCAGTGAAATGGTCGAGC…
LOC108218697	TGCCTGTTAGCTACAATACACTCTGAAACTACTTCTTTCTCTTCTGATCTCCATTTCTGTACACATAGGTCCATGACGAAGAAGAAGAAACTCACTCTTTCTCTCCTCTTTCTCTCTCTACAATTCTTTTCTCACTTTCCACATCCTATCACTGCCAGAGGCGGCGCTCGCTCCTCCACTAACACTTCAGGTTTTGTTGGTACAAGTTACAGAGGTTTGAAACGAAACTTATTGAAGGAAGAACGGTTTCTAAAGCTTGATAAATTAGCTCATGGATACATGACGAATACTGATCTCAAGAATGCCATGAAGACACTGAATAAAAGATGTAGTAGCATAACCAGGATGTACACTATCGGAAAGAGNGAGTGTCTTAGGAGTTCCGCTGTGGGTGATGGA…
LOC108218697	TGCCTGTTAGCTACAATACACTCTGAAACTACTTCTTTCTCTTCTGATCTCCATTTCTGTACACATAGGTCCATGACGAAGAAGAAGAAACTCACTCTTTCTCTCCTCTTTCTCTCTCTACAATTCTTTTCTCACTTTCCACATCCTATCACTGCCAGAGGCGGCGCTCGCTCCTCCACTAACACTTCAGGTTTTGTTGGTACAAGTTACAGAGGTTTGAAACGAAACTTATTGAAGGAAGAACGGTTTCTAAAGCTTGATAAATTAGCTCATGGATACATGACGAATACTGATCTCAAGAATGCCATGAAGACACTGAATAAAAGATGTAGTAGCATAACCAGGATGTACACTATCGGAAAGAGNGAGTGTCTTAGGAGTTCCGCTGTGGGTGATGGA…
LOC108218697	TGCCTGTTAGCTACAATACACTCTGAAACTACTTCTTTCTCTTCTGATCTCCATTTCTGTACACATAGGTCCATGACGAAGAAGAAGAAACTCACTCTTTCTCTCCTCTTTCTCTCTCTACAATTCTTTTCTCACTTTCCACATCCTATCACTGCCAGAGGCGGCGCTCGCTCCTCCACTAACACTTCAGGTTTTGTTGGTACAAGTTACAGAGGTTTGAAACGAAACTTATTGAAGGAAGAACGGTTTCTAAAGCTTGATAAATTAGCTCATGGATACATGACGAATACTGATCTCAAGAATGCCATGAAGACACTGAATAAAAGATGTAGTAGCATAACCAGGATGTACACTATCGGAAAGAGNGAGTGTCTTAGGAGTTCCGCTGTGGGTGATGGA…
LOC108215957	TTTATATCAAGACCCAAAATGTAAAAGGATAAGTTTGATCTCCATTGTTGCATCAAGATAAGGAGATATGCAGGTCCTTCTTCATCCTGGTAATTCTTTCACTTTCTTAATTCCACCCTTACCCCTCAACAAGTTTATTATTTACAATTTAGCCCCTCCACCCTTCCCATTACCTTCATTCATCAAAACTAGAGCTTCGACTTCAACTTCAAGAACTGGGTTTTGTCAAAGTTTGTATTTTGTTACAAAATATGCAATTTCAAGAACTACTCATGTCTCATTTTGCTCAAAAGGTGAGATCTTGGAAGATTTTAGAGATACCCATTTGAGTGAAGACTTGAATTTTGAGAGGAATGGTGATGTTGAAGAGCTTGAATTGCAAAATAAGCCTTCTCCAAT…
LOC108205312	TCCCATTCCCCCCACTTTTTCTCACACACACACTCACTCTCTCTATCTCAATTAGCGATGAACAACGGCAAATCGAAGAAGCGGGGCGCTCCGGCGCCGCCGGCCAAAACGCCGCCGCAAAAACAGCACGCCACGACGGAGATTGAGGAGGATGATATGCTCGACGAGGACGTTTTTCTCGATGAAACCCTACTTCACGAAGAGGAAGAGCTGTTACTTCGCGACATGGACGAGCGAGAAGCAATTGCTTTGCGTCTCGCTAAGTGGAAGCGCCCGACGCTGTCGCCGGCTTATTTGTCGCAGTCTACGAATATTTCAGCTGGAAATAGATTATGTGATCGGAGAGAGTCACAAAGAGTTGTTGCCTAATTCTTCTGGTCCTGCTGCTATTATTCGAAT…
LOC108204936	ATTTGACAGCCACGGCAGATACAGATAAAGCCTGTTAAAGCAGATAGATATAAAGATGAGGTTTGGCTGAAGCTTTTTGGGTTTTCATTCATCAGCAAAATGGTGGTGACAAGATGGGTAGACCTGAGATCTGACACAGTAACTAAACCAACCGAAGCGATGCGCGCTGCAATGGCCAAGGCTGAAGTTGATGATGATGTATTGGGTTTTGATCCCACGGCACTTAAACTTGAAAAAGAGATGGCCAAGATCACGGGAAAGGAAGCTGCATTATTTGTCCCTTCAGGCACTATGGGTAATCTCATCAGTGTCCTCACTCATTGTGATGTTAGGGGTAGTGAGGTGATTCTTGGTCATAATTCTCATATCCACATATACGAAAATGGTGGAATTTCAACT…
LOC108205349	GGCCTACTTAGTTTCAATAAAGTGTAGAAACATACAAGGGTTGGTATTTTCATTTTTTTTCTTGATAATACACATGCCATCTTGTCCCACCAGTGACTTGAGATTTTCAAACCTTCAGATTACTCACCTTTGAATTATAACAATGCAAAATATTCTTCCTTGATCAAGCCTCTTACTTGTATATAACATTACTAGCACTCTTGAGCTACTTAAGCTTTTGTTGGACTTACATTTCTTTCTGCAACCTGCCTGCCTGTATTTGCCTCTGCTTTTGTTTATAGTTTCGGATCATGATTGATCTTGGACAAGGTACTGATGGAAACAATTTTTCATCGTCCCGTCGAGTGTACCAGGTTAGCAGCAAAGAGACTAGAGCCAGCAAACAATATAACTTTTGGG…
LOC108205388	GGAATGAATATACATGGTCCCTTTTAGTATACATGATTGAAAACGTTATGGACCCATCGAGTATACAGTGCAGACCCTCGCGTTGAGGTGGAGTCCTGCAAAGCTATCAGACTAACCGCCCAGTCCGCCATGTTCTAAATAAATATGGAGCTTCTAACTTTTTCTGGCCTAGCTTTCACCGGCATAAGATGTTTGTATAAGCATCATAGTTTGTTGAAGAAATATATGCCAAAACGTAATTTGTTTTCCATTTCGTGTTCATATGGTGACGTTGTAGACCTGTTTGTTCCCTCCAGCGCACAAGTTTTTGATGGTAAAATTATTTACTGCGTTGCTCCTGCCATGGGTCATAACAAGGATTCGCATCCAGAATGCCATCTTAGAGTTCCTTCCATTGTG…
LOC108204080	TCTCTCTCTCTACTCTTTTGTTTTCTTCATCAACCTCTTTCCTCTTCAACAACTCTCCATTTTCATCTCTCTCTCTCTCTCTCTCTCTCTCTCTCTCTCTCTCTCTCTCTCTCCCCCCACATACACACACGTAAAGTTCCTTCTATTTTTCACTCTGTGTCTCTCACTAGGTCAAGATTGACACCTTAAAGATGCCAACTTGGTGGCCGGGGAAAAAATCAAGCAAGACGAAAGAAGATCAAAAGAACAAGTATAGCAACAACACTATACATCAAAGCTTGAGCAAAGACAATAAAAATCGAATCTTTAAAGATTCCAAGCCAAGAAGCTTTGATGATGTCTCTTCTGCTGTTATAAACAAAGGCTCTCCAAGAATTAGCAAAGAAATCAATAAAAATG…
LOC108204716	TAAATCAGCAGCATTTTAAATTTTGCACGAGATCACATGAGACAGCCAGGCGATAATGATAATGTATGCAATAATGTAACACTCGTGACATAAACTTGAAGTTGAGTTTACTTGCAAATCACAATCCTTTTCTTGTTACCGATCTAATCTATCATTTCACACACCCACACAATAATATCATCATGCCCCTCCTTTGTTTTCAGATCCCCTCACATTTCTCAATGTAATCTCCCTCTCTCTCCGGATCCCCAATTCACTATCGAAAAATGCACAACCCAACTAACCAAAAGCACCACCGCCGTGAACCCATTTCGCGCCGTCACATTTCATGGTGTTGCTCTTTCTCCGACCCGACCCGGAGCCCCGAAAACCCGAAACCCATCCAGAAACAACAGCCCA…
LOC108204501	TAGTAAAAATTCAATAAAAATAACTTCTAGTTCCTTCTGTACTCCCTATTCTCGGCCGCTATATATAACACATCATCGCACCACAGCTAGAACTCACAACGTAGTTTATTTGATTCTTAATCCCCTTGTCTGTGCTAGTTGCTTCTCTTCCCTTTCAGTTCTGCTCCTTCTTGGGCTCGTATTACGCAACAAATGTCTTTTGATCCCATCGAGACACACACCCCTTTGTTTCTTTGGCGTTCATTCTGTTTTATGAGCTCTAGCAGGCTGTGGAGGATTTTATTCCGGCATTGGACTTGACGTACCCACTGGTTTGAAGCTTGCGTTTTTTGTTTGTTTGCTTTGCATTTTCATTACGTTTATTGTGAAAAGAATATACAGTGAAAACAGTAGTGTCTA…
LOC108204862	ACACCCGGTTCTCGGCGGTTAAGAACGAATAAGAACACAACGCGAGATCTGGAAGTAATGTACAGCTGAAAGATGTTGTCGGCGACGAGCAGAAGCTCCGCATCTTCATTACACTTGAAATCCACCAGACATTTCCATAGGAAACCATCTCCATACACAATCACGCTTTACATAATCGCCCTATTTGCTCTCTCTATTTTCATTTTTATTTACTACAGTAAAGATATCTTAGACATTGATGATCAGCACAAGCCCTTTTCGTCTCAATCCCACCAGGTCTTATATGTTTGCATAAGCGTTTATGTGTGATTTTAACAACTGGGTTTGTGTTTGTTATGGTTTTAGTCATTTGTAGTTGATGTAAGATGAAAAATAGGGGAATTAGGGTGTTTCTTTGTT…
LOC108202250	CTGAACGCGCCTTGGTTTGGGCTGGAACTTGAACATTTTTCACTCACTTTAAACACCCAAAATCCACCAAACCCTAGTTCCCACCCCTCCGATCGAAATGGCCAAAGACGAGCTCGCCGACGCCAAAAGGTCGTACCGGAGCGCCACCGAGATCGGCGACCGCACCGAACAAGCCCGGTGGTCCAACGTCATCGGCGACATCCACAAGAACCGAGGCGAGTATGTGGAAGCTCTCAAATGGCTCCGCATCGACTACGATGTCTCCACAAAGTACTTGCCGGAGAAGCAGCTTCTTCCTACTTGTCAGAGTATCGGTGAACTCCATTTCCGTCTCCTCCACTTCCAAGACGCACTTGTTTATCAGAAAAAACATTTAGAGCTTGCCAAAGACAAGGAAGA…
LOC108202250	CAGATATGTGAGTGTCCTGTTCTATTTTCTCGATTGGAAGTTCTAAACATCTCTGGAAACCGTCTGACTGATTCTTGTGCATCCTACCTTGCAAACATCTTGAAAAATTGCAAAGCACTGTATGGCTTAGACATAGGGAGCTGTTCTATCACATCTAGAACAGTTCAAAAGATCGCCGACTCGCTAGATTCCGGATCTTCACTAGTACAACTTGGTTTAGGATACAACAATTCCATATCTGGAAATGCCATAGTGAATCTATTGGCCAAGCTTGCTACTTTAGATAGATTTGCAGAACTGAACCTCAATGGTTTAAAGTTAAACAAGGCTGTTGTAAATGGCATTTGCCAACTAGCTAAAACCTCATGCTTGTCCGAGTTAATGCTTCAAGATACTTGC…
LOC108196707	ATATGTGCTTCTCTCTCTGCTGTTGCCCTTTTTCTAGGATTTCAAGGCGCCGCTCGGAAATCAATCATCCTCCGATTAAATATCTCTCTTGCCGAAGCTGAAATCCTGAAGATGAGGAACTCCATCTTAGAGAAGCAAGTTGAAATGCAGAGGATGAAGCAAGTGAGCAAGTGTATCAAATAATCCGCTCGCAAGATTGAGGGTAAAAATTCTGAAGCTGTTGCAGGGTGTTACGAAAACTTTCAGCAATATCAATTAGAGTCCCTCTGGCTGATGATGTTAAGGAGCTTCACTAGGAATGTGCATGCACTATTCTTATCTCTTCACAGAAATAATGAAATTGTCTTTCAGCAATTGAGAAGCCTCAACCTATTATACCAGCAAGATCTATTTGTTTAC…
LOC108206570	AAAAATTAGAGCCAAACAGGTTCTTAGTGCTCCGGACCGAGCTGGACCTAGTTATTATATACAGAGACACAGGTTGAGGGTTAGGGTTTATCATCTTCAATAACAATTAAGCTTGAATCGCAATGACTAAGTTCAGGAAGCTTAATCGACCAACAGGTCATCGCATGTCTATGCTCAGAACAATGGTTTCGCAGCTTGTTAAGCATGAGCGTATCGAAACTACTGTTGCTAAGGCAAAAGAAGTTCGTCGACTAGCTGACAATATGGTACAGCTTGGAAAGGAGGGCACTCTCTGTGCTGCAAGACGTGCTGGTGCTTTTGTTCGAGAGATAGAGCAGGGGGATACACAAGAATGCTCCGTACTAGAATACGAGTCGGTGATGCTGCACCAATGGCCTA…
LOC108214849	GGAAAGGCGGTCATGTAAAAAGATCCAGACATACGTAGCGATAGGTGCAAGCCTTCTCTTGACTCATGCACTCCTTGCCATTCAACTGCATTATGTTTTTCCTCATACTTTCCGACCCATATCTCCTTCCCCAAGCTTGTTCGGGTGACGCAACCAGAATTCCGAAATCCGTTTAGGAGGGGTTTAAAATCACATTATAAATGAATTTTGGGACTCATAATGATAATATTTTACCAAATTTTTATTATTGGCCTTTATGCCCAGGTACAACCTCAACTTCAACTTCAACTATACTGAGAATCAATTGTTTTCGCTAACCAAATTTCTATCCCCGAAAGGAACAACTCATACTTAGCCTCTGCTAATGATTACTTGGTTTAATTATCTGCTTTTGGGTTA…
LOC108214849	GGAAAGGCGGTCATGTAAAAAGATCCAGACATACGTAGCGATAGGTGCAAGCCTTCTCTTGACTCATGCACTCCTTGCCATTCAACTGCATTATGTTTTTCCTCATACTTTCCGACCCATATCTCCTTCCCCAAGCTTGTTCGGGTGACGCAACCAGAATTCCGAAATCCGTTTAGGAGGGGTTTAAAATCACATTATAAATGAATTTTGGGACTCATAATGATAATATTTTACCAAATTTTTATTATTGGCCTTTATGCCCAGGTACAACCTCAACTTCAACTTCAACTATACTGAGAATCAATTGTTTTCGCTAACCAAATTTCTATCCCCGAAAGGAACAACTCATACTTAGCCTCTGCTAATGATTACTTGGTTTAATTATCTGCTTTTGGGTTA…
LOC108206617	GAAAGTCTTGAATATATAAAGCAGGGTGGGGGGAAGGGAGTCTTATCTTGCTATTGTAGCTTATCTGCCTTTTCTCTAATAAGTTGCACTTGCTTTAACACTTTGTTGACATTTATGATGGCTCATTTTCTTTACTTGTTGCTACTTGTTTCCATTTGGTTCCCTCACTTCTTCCATCAACCTTTTCTTTTCGTGAATGGAGACACTGATTTAATCCAAAAAACTTGCAAAACCACCAAGTACTATGACCTCTGTCTATCATCTCTCAAATCAGACTCCACAAGTCCTGCAGCCGATACGAAAGGACTGGCAGTTATAATGGTCAAAATTGGAATGGCTAATGCAACTTCCACAAATTCTTACCTGGCCTCCCAACTATCCCCACCGAAAAATGCCAAC…
LOC108202605	TAAAATGTGACGGAGGTAGATACATAGAAGTCCAAAGAATAATGAAATCAAGTATTTATATAATCTCTGTTCTCTAACTCGCAGAGGAATATAGCCGCCAAACACTCACCGCCTTCCGGCTACACTTCACTAGCATAGCAAGATATGGGAGAAGTCATTCTAGGCATGCCAGGCCCATGGGCAGATGATTTATACGAAGCGGCTGACCATTATACGACAAAATTTGGTGGACTTCCTGATTGGCCCATTCCTAATATGGTCATACCGCACAATTGGCGTGTGTGCAGATCATGTGGAAATAGTTTATTGCTTGTTGCTCAGATTTATGCTCCAGTATCTACCAAGACCCTGACATTTGAAGAACGTCAAATTTTTGTTTTTGGCTGTATATCACCAACA…
LOC108202605	TAAAATGTGACGGAGGTAGATACATAGAAGTCCAAAGAATAATGAAATCAAGTATTTATATAATCTCTGTTCTCTAACTCGCAGAGGAATATAGCCGCCAAACACTCACCGCCTTCCGGCTACACTTCACTAGCATAGCAAGATATGGGAGAAGTCATTCTAGGCATGCCAGGCCCATGGGCAGATGATTTATACGAAGCGGCTGACCATTATACGACAAAATTTGGTGGACTTCCTGATTGGCCCATTCCTAATATGGTCATACCGCACAATTGGCGTGTGTGCAGATCATGTGGAAATAGTTTATTGCTTGTTGCTCAGATTTATGCTCCAGTATCTACCAAGACCCTGACATTTGAAGAACGTCAAATTTTTGTTTTTGGCTGTATATCACCAACA…
LOC108202605	TAAAATGTGACGGAGGTAGATACATAGAAGTCCAAAGAATAATGAAATCAAGTATTTATATAATCTCTGTTCTCTAACTCGCAGAGGAATATAGCCGCCAAACACTCACCGCCTTCCGGCTACACTTCACTAGCATAGCAAGATATGGGAGAAGTCATTCTAGGCATGCCAGGCCCATGGGCAGATGATTTATACGAAGCGGCTGACCATTATACGACAAAATTTGGTGGACTTCCTGATTGGCCCATTCCTAATATGGTCATACCGCACAATTGGCGTGTGTGCAGATCATGTGGAAATAGTTTATTGCTTGTTGCTCAGATTTATGCTCCAGTATCTACCAAGACCCTGACATTTGAAGAACGTCAAATTTTTGTTTTTGGCTGTATATCACCAACA…
LOC108202605	ATAAAATGTGACGGAGGTAGATACATAGAAGTCCAAAGAATAATGAAATCAAGTATTTATATAATCTCTGTTCTCTAACTCGCAGAGGAATATAGCCGCCAAACACTCACCGCCTTCCGGCTACACTTCACTAGCATAGCAAGATATGGGAGAAGTCATTCTAGGCATGCCAGGCCCATGGGCAGATGATTTATACGAAGCGGCTGACCATTATACGACAAAATTTGGTGGACTTCCTGATTGGCCCATTCCTAATATGGTCATACCGCACAATTGGCGTGTGTGCAGATCATGTGGAAATAGTTTATTGCTTGTTGCTCAGATTTATGCTCCAGTATCTACCAAGACCCTGACATTTGAAGAACGTCAAATTTTTGTTTTTGGCTGTATATCACCAAC…
LOC108204713	GTGGAGAGAGAGGGAGGGGGGGAGAGAGAGAGAGAGGGGGTTGTGGGTTGGGATATAAAGAAGAAGTCATGTTCTGGAGGAGGGGAAGCGAAAAAGAGAACAAAGAACAGAATGGTGTGCTGCCGAGCGGGCAGGTTCGGGTTCTTGTTGTGGGTGATGCAGCATACTACTCATGGAAGTTCTAGTAGCTCTTCAAATAGCATTAAAGGTGACACTGAGAGAGACTTTTTTGTTGAACTTTGGGATGTGTCAGGACACGAGCGATACAAAGACTGTCGGTCCCTTTTTTATTCCCAAATCAATGGTGTAATTTTTGTTTATGATCTCTCTCAGAGAAGGACAAAATCAAGTCTGCAGAGTTGGGCTGTTGAGATTGCAGCAAATGGAACATTTTCAGCT…
LOC108205336	GCTTTGAGATGGACAGCCCAGTTCTTCTTAATTGCAGCAGAGTTAGCTAATTGATTCTGTGTGTAACTGTGTGCACAGGCTCCAGCACTCTGCAACTGTTTATCCTCTTCCTCACCCACAACCCAAGTGTATCAAAACTACCATATTGTCACTAGGCTTCTTGGAGTTGGGAGGTGATGGGTCCCCTTACATTATCTGTTGATATGAAAAGCTCTTCTTCAGGTTAACTATACTCTCAATGTTTCATTCAAGCACTGATGCATCCAGTAGGAAATTGCAGAGCCTGCAGTTGCAAAAGAAGAACTTTTTTGCATCAGTGAGCACAGGAGAGGAAAAGCCATTTGATTTTCTTCGAACTCTATTTGAGGGTTTCATAGCAGGAGGCACAGCTGGAGTAGT…
LOC108210676	ACACAAACTAAACATCAAGTTTAGTTGGTATATGATGTTCTAGTGCGAGTAAAACTAAACCAAACAAGAATACTGGTGTAAAACAAGACAAAGTGGCTGCTTTCTTGGGTATCTATTTTGCTTGCCTTGTTCTATTATCCTATCTTTCATGTTTCTTCCTTTTCTTTCTTTTATCTTCATATCCCCATATGTAAACTATTATATTATCCTAGATCTTCTATATTAACATAAATATTATCCTGATCGAAATATACTTGCTTATAACCCGTGCCAGAGACGGATCTTACAATAATAGTTTCTTCTTGTTTTGCTTCAGAAAGTTATAAGATGCTGAACCAGGGAGGATTGTATGAGGATCGGCATAGCCATTTAGAGATGGGATCATCAAATATAGGGTTG…
LOC108204215	CTCGAGAGGGCTAAAGTGCGAAACACAGCCACACGGGACTCTCATAATTGAATTCGCTTCTTCCTTGCTGCTCAAAGCCTAGGGTTTATCACATCCCCCAATTTCTCCATGGATTTCGATGAGTACGAGTATCTCGAGAAGACTGTTGTTGATCCCGACGCGTCCGCCGCCAAGGACGATGTCGTTTCGGAAAAGGCCGACAAATCTCACCGGAGGAGAGACAACGACGACGAGGAACGAAGGAGCAGGAAGTCTCGTGGCGAGGAGGATAAGGAGAGAGATAGAGAGAGGTCGTCAAGGCACCGGAGCGACAGAGAGAAGGAGAGAGACAGGGAGAGAGATAGAGAGAGGGATAGGGAGGGAGATCGGCATAGGAGTAGTCGAGACAGGGAGAGAGTA…
LOC108204707	GAAATTCATTTAATTTTGGACAGACCTGTTTATATATATTGACAAAAGCTGCTCAGTGGCCAAAGCAAGCAAGTAATCAATTCGTGGCTTCTCTCTCGCCTACGTACGATTGCTCTACTTTTCAAAACCCTAGACACCTATACATACAGATTCGGATAGATACTTGCACAAATTCACTTTTTGATCTGTGGTTGCTAGAATAATGGCGAGGAAGATGTTGATTGATGGAGAGGCGAATAAAGCAACTAATGACGAGCGATATGATTTTGATTTGTTTGTTATTGGTGCCGGAAGTGGAGGTGTCAGAGCTTCCAGGTTTTCTACTCAGTTCGGAGCAAAGGTTGGTATGTGTGAGCTTCCATTTCATCCAGTTAGTTCTGAAGTCCTTGGAGGCGTTGG…
LOC108204725	TCAACTTTGAATTGAAATTATACAGATACTGCTCCTGATGCTTAATGTGTAACGTTATCATGTATGATATTGAAACATTCACGATCATTACATTAAGCTGGTATATAAAACCATATTGCCAGATCTCTGATCTATATTGATTTTCTAAATTTATGCAATTCTAAATGATTTTGTATTTTGTAGAAGGATCTTAATTAATTTAGCAGGTGACTCGGGTATATTCACATGAGTCATATGTCTATTCTGGACATGGTGATAGCTTGCTTGTATAGTTGTATGTGCCCGTGGTGTTTATTGGTGTAATTAGATTAGTCATACAATTCGGGTCAGTATATGCAGAGAAAATGGCAAGCGTGTGGGATATACTGTGAAGGATAGTGACTCTGAAGCAGACGCTTA…
LOC108204725	TCAACTTTGAATTGAAATTATACAGATACTGCTCCTGATGCTTAATGTGTAACGTTATCATGTATGATATTGAAACATTCACGATCATTACATTAAGCTGGTATATAAAACCATATTGCCAGATCTCTGATCTATATTGATTTTCTAAATTTATGCAATTCTAAATGATTTTGTATTTTGTAGAAGGATCTTAATTAATTTAGCAGGTGACTCGGGTATATTCACATGAGTCATATGTCTATTCTGGACATGGTGATAGCTTGCTTGTATAGTTGTATGTGCCCGTGGTGTTTATTGGTGTAATTAGATTAGTCATACAATTCGGGTCAGTATATGCAGAGAAAATGGCAAGCGTGTGGGATATACTGTGAAGGATAGTGACTCTGAAGCAGACGCTTA…
LOC108204725	TCAACTTTGAATTGAAATTATACAGATACTGCTCCTGATGCTTAATGTGTAACGTTATCATGTATGATATTGAAACATTCACGATCATTACATTAAGCTGGTATATAAAACCATATTGCCAGATCTCTGATCTATATTGATTTTCTAAATTTATGCAATTCTAAATGATTTTGTATTTTGTAGAAGGATCTTAATTAATTTAGCAGGTGACTCGGGTATATTCACATGAGTCATATGTCTATTCTGGACATGGTGATAGCTTGCTTGTATAGTTGTATGTGCCCGTGGTGTTTATTGGTGTAATTAGATTAGTCATACAATTCGGGTCAGTATATGCAGAGAAAATGGCAAGCGTGTGGGATATACTGTGAAGGATAGTGACTCTGAAGCAGACGCTTA…
LOC108204725	AATTAATTTAGCAGGTGACTCGGGTATATTCACATGAGTCATATGTCTATTCTGGACATGGTGATAGCTTGCTTGTATAGTTGTATGTGCCCGTGGTGTTTATTGGTGTAATTAGATTAGTCATACAATTCGGGTCAGTATATGCAGAGAAAATGGCAAGCGTGTGGGATATACTGTGAAGGATAGTGACTCTGAAGCAGACGGTATTTATACTTTGATTTTTATTTTCTTTTTTGTTTTCTTTTTCCCCCTGTAACCCTTCTCTCAGTTTGTACCTATTTTCATCTACACTGGTAGTAGGTGATGAATATTGGGGCTCGAGGGTTTAAACTGAGACCAATGTGTTTAGTGGGCTTTATCTGTATATCATGAATTTTCATATAATTTAGTAGATACGCA…
LOC108209246	GGTTGAGCATATTATTTCTTCGCTGCGTTTGCGTTTATTTCTTTGGGCAAGGGTTTAACACTCTCTCTCATCATCTTCAAAGTCTTGACCAGCAAAACCCTCTTCTCTCTCCCTCCTTTATCTCTCTCCCCAAGTCTCTCCCAAATCTCTCCCACATGGCAACTTCTCTCCCATCTCCCTCACTATCCCCCTCACTACCCTCCACCAAAACCCCAAAAACCACACCCAAAAAGCTCCCCACCCCATCCGAAATGATAGCCCACTATGAATCCAAAGGCCTCACCACCCAACAAGCTTCTCTCAGAGTCATTGAAGACCTCCAGAAAGCTCTCTTTCGGAAGCTCGTTGTCGAAAACACCACTCGGAAGGCTGTCAATGCTGGGGACACAACTGCAGCTG…
LOC108204327	TAATAAAGCTGTTCCTGTTAATCAAGTCTAAAAGGTAAAATTTCAAAAAAATACTTAACAGAATAAAAGACATAACTTACTCCTCAATTGTTCAAGTATTGTAGTAACAACCCACAATTGAGGCACAGAGGACGAAAGATAATAGAAGGCTTGTCATCTTTAGCATACATCCAGAACATAAACTGATATGTGAACCAGTGGACAAAAAGTTGATACATCAAAATCACATTATCCTCCCAATCAACCACAACATAGAGTTCACATGAAAAATTACACGAAAATCCAACTAAATCGAAAAAGAAATTCAACCTCAATACAAATAATATCGAACTTAGAAACACTTCCTGTGCACGATTGATGGACCAGATTCATCATATTCGCCCTTGGATATCCACATCT…
LOC108212773	TGGGTTTCACACTCTTCGTGCAGATAGAGGATTCCTCTTGCAATATCAAGAGCAATTCTAATTCTTTCATCCCATCTTGGCGGGTGCTGGGGATCAAAAAGAATATCAGCAAGTGATCCATTAACCATATACTCGTACACGAGAAGCTTTTTAGGTCCATCATGACTATAACCAAGAAGCCTGACAAGGTTACGATGATGGGTTCTTCCAATAACTTTCATTTCATTCTGGAACTCTTTCTCTCCTTCTGCTAACATATTCTCCAATCTTTTCACAGCTACTAATTTGTCATTAAATTTCCCTTTGTAAATTGTTCCAGATGCTCCTCTTCCAATCTCTTCTTGAAAACCATTTGTCACTTCTTCCAACTCTGCATAAGTAAATGACCGCGGAGCAATA…
LOC108204391	ATTTTCCGCACTTAGCATGTGCCCATGAACACACGCTACACAAACCCTAACAAATAAGCTAATAAAACCATCTCGATCTTAGTTCAATTCCAGTTATATATTATTCGAAGATATGGGTCGGCCGAATCGTGCAAAGGACAAGGACGGTGATCCTCTTCGTACCCAGAATGCAAAAAGATTGGATTGTCAAAAGTCAATATCAGATCGTAAGAAGGCAAATTTAGATCGTCTAAAAGTTTCAATGCAACGTGCAAAGGCTTTGGGTGGTGAGATTCCAATATTAAATAGTCTATCCCTTCAAATCCCAACTTCTGCTTCTCAATTCCGGATATATCGAAGAACACCGAGTCTCAGTGAAAGCCAAAGATCAATAGTTGCGGGTGCATTGTCTGTTTTTCC…
LOC108204308	CTAGACAGAGCCGAAATAGGGGAATTGAAGGCAAGTCCATACTAGTTCTTCTTCTTCTTGTTGATAATCGAATACTGCGCATCACTGAGCGGGTGTCAATGGACTCCTACACTCCATTACTGGAGAGAACTCGAGTTCCCCAACCCTCTATTCAATCCTACGCCGTTATATCCATTTTCGACAAGTTCCGATCCTCTCCGCCCCACCTGATTGACGCCGGAAGAGAAGCAATCGCTCAATGTCTTCTCTCCTCTTCCCCCGCCGTCGTCGATCAGTCCGTACGCCAATTGTGTCGTCTCGTGATCCAGGAGAAATTCAAATTGTCTGATGCTTTGATGGAGCTCCAATCAGCCTTAGAAGCCTCCCAATCACGTTTTGTTGATGTGTTTGTCAAGGCTT…
LOC108204881	TGTATAGAAAAAGGGGGTAATGTAATGACTGGTGTGGCTAGTGCTACTGGTATCACATCAAGCTCAGCTAGTAGAAGAAGCAGCAGCTGCAGCTTCATCCCAAATCAAAACATATTATCCCAACCCCATCCTCCTTCTCTCTTGCCCATTCCATTCCGCCTCTTTCGTCCGCTAGTTGCAAGAATGGATGGGTGTGGAGGTTCAACCTTGTTCCCGTTGCACCGCTGTAAAACGATACATCTGGTCAGGCATGCACAAGGCATTCACAATGTAGAAGGAGATAAGAACTATAAAGCATATATGTCGCCTGAATATTATGATGCGCACCTTACACAACTAGGTTGGCAGCAGGTAGATAACTTGCGTAAACATGTTCATGCATGTGAGCTGCTCAAGAAG…
LOC108204881	TGTATAGAAAAAGGGGGTAATGTAATGACTGGTGTGGCTAGTGCTACTGGTATCACATCAAGCTCAGCTAGTAGAAGAAGCAGCAGCTGCAGCTTCATCCCAAATCAAAACATATTATCCCAACCCCATCCTCCTTCTCTCTTGCCCATTCCATTCCGCCTCTTTCGTCCGCTAGTTGCAAGAATGGATGGGTGTGGAGGTTCAACCTTGTTCCCGTTGCACCGCTGTAAAACGATACATCTGGTCAGGCATGCACAAGGCATTCACAATGTAGAAGGAGATAAGAACTATAAAGCATATATGTCGCCTGAATATTATGATGCGCACCTTACACAACTAGGTTGGCAGCAGGTAGATAACTTGCGTAAACATGTTCATGCATGTGAGCTGCTCAAGAAG…
LOC108203722	AAGAATCGAAGTCAACGAAAATGTTGTTGACTTAAAAATCAGAATCTTTCTCCAATTCACACATGGTATATAACTGAAGTGCTGTTCCTTCTCTAGTTCTCTGTATACAACTGAACTAAAGAAATACAAGCATGAGTTCAAGAGGGATATTTTTCCTTGTCCTCCTAGCGCATGCTGCTAGAAGCTGGTGGAGTTGCAAAAGCTTGTTACTTGTACTGCTTGCAAGTCGATTACATGACTTGTCCGTCTTCGGGTGAGGAGAAGCTCGAGCCAAAGTGCAACTGCTGCTTGGCACCGAAAGGGTGCACTCTTCACCTGTCTGGTGGGTCTTCAATGCTCTGTTCCAAGACTTGAAAGCTATTCATATGTATTATGTTTGTGTCTGTGTTTTGTATGAAT…
LOC108203719	CCTGACGGAAATAATCCGCGAACACGTTCCCGGCATAGCGTCCTGTATATAACCTCCCCAACTCAATCCAATATCTCTCTCGATATTCAACCTCTCTCTCTCTCTTTCTCTCTCTTTCTCTCTCTCTTAAGTCTCAATACACACACTCCCTCTCTGCCCCCCTCTCTCTCACACACGCACGCACTGTACACACACCCACCTTTCCTTAATTCCAATGGCAAAATCCTCAAAATCAAGCTCAAAACCTCCGATCGTGCAATTAAACGATCTCGAATTCGACTCCAACTCCTACTCACTCGAGAAATTTACACTCTACGAAACTCGAGCGAGATTTTATCTGATTGGAAGCGACCGGAAGAAGAGGTACTTCCGAGTGCTGAAAATCGATCGAATGGAAGC…
LOC108203719	AAGAGTGTCCGTTGCCCCCTGACGGAAATAATCCGCGAACACGTTCCCGGCATAGCGTCCTGTATATAACCTCCCCAACTCAATCCAATATCTCTCTCGATATTCAACCTCTCTCTCTCTCTTTCTCTCTCTTTCTCTCTCTCTTAAGTCTCAATACACACACTCCCTCTCTGCCCCCCTCTCTCTCACACACGCACGCACTGTACACACACCCACCTTTCCTTAATTCCAATGGCAAAATCCTCAAAATCAAGCTCAAAACCTCCGATCGTGCAATTAAACGATCTCGAATTCGACTCCAACTCCTACTCACTCGAGAAATTTACACTCTACGAAACTCGAGCGAGATTTTATCTGATTGGAAGCGACCGGAAGAAGAGGTACTTCCGAGTGCTGAAA…
LOC108219141	ATTCAAGCAAACATGTATCTGCAAGACGATTTGACCGACCCTGTGCCCGCCACGACATTTGCACATTTGGATGCTACTATTGTACGATCAAGAGGATTAGCCGCCAACAATACACATGTAGTTAAAAATTTTGCTGTCATCAGTTCCCCAAATCAAGAATCCACATGAATATTCCTATTGTCCTGTAGAACATAGGCATAAGAATAAGATGACCAGGTTACCACAGCTAAGTAAAAATATATGGTTTTCGGTTTCTTCACGACATCAAGAATAAATGGCCAGCCTGCATTTTAACATGCAGAGTACTGGAGTGGTTAAGTTCTGCGGTGGAAGAAGCCCTTTTCTCTTTAGAATAACAGTGCCTAGCTGCCTATTGATGAGAGTAGCCACCTTGCACTA…
LOC108219141	GTGTAGTTCCTGTTTTTTTTCCTATATATACACCTGGTAGAGAGGAGTGTAACATTATTGCTTGCACAGAAGAACAGGGAAAATTTAGAATCGAAAAAAGAGATACAACAATGGCAGAGGAGCAAACCCTTCAAGTCCTTACTCCATACAAAATGGGCAACTTTCATCTTTCTCATAGAGTGGTTTTGGCACCTTTGACAAGACAAAGATCTTGTGGAAATGTTCCTCAGCCCCATGCTATGTTATATTATTCGCAAAGAACCACAAAAGGGGGTCTTCTGATATCTGAAGCCACCGGAGTTTCTGACACTGCCCAAGGGTATACAGATACACCAGGTATATGGACAAAAGAACAGGTTGAAGCCTGGAAACCCATTGTTAATGCTGTTCATGCTAAAG…
LOC108210158	ACGTGGAAGTAAACGACTTAACCACGTACCCCTTTTTTTAGCACCGCCACCGTTTATTCCACCACCGCCTTTGTATATACACAATACTTCTTCCTTTTTATCTCAAACATCAGTCTCCTTCTAATCTCTCCCCCTCTCGAAATCTTCTCTGTGTCGACAGCCTCTCACTCGAACTGTCCCTTCTCCTATTCTGTTAAACCTCCCCGCTGCCGATATGCTCCACACAAGTCGTCGCCGCTGGTTCCGATTCCGGCCAAACCTGTTGTGGTCACCCCGCGAATTTCTTCTTGTCCATGCCTACTGCTTCTTCCCGGTCGGAAGTTATCGATTCTTTTCTCTCCGGGTTTCTCTATCATTGAGTCTCCAAAACCTGCATCAGCTGTGGCATATTTGTCCAAC…
LOC108210158	ACGTGGAAGTAAACGACTTAACCACGTACCCCTTTTTTTAGCACCGCCACCGTTTATTCCACCACCGCCTTTGTATATACACAATACTTCTTCCTTTTTATCTCAAACATCAGTCTCCTTCTAATCTCTCCCCCTCTCGAAATCTTCTCTGTGTCGACAGCCTCTCACTCGAACTGTCCCTTCTCCTATTCTGTTAAACCTCCCCGCTGCCGATATGCTCCACACAAGTCGTCGCCGCTGGTTCCGATTCCGGCCAAACCTGTTGTGGTCACCCCGCGAATTTCTTCTTGTCCATGCCTACTGCTTCTTCCCGGTCGGAAGTTATCGATTCTTTTCTCTCCGGGTTTCTCTATCATTGAGTCTCCAAAACCTGCATCAGCTGTGGCATATTTGTCCAAC…
LOC108204549	AAACGAAGAAGAAAAGAGACTCAGCTGCGGCAATTTGAGGCGCGAGCCCAGCACAACCTGCTCAGCTCCTCTCTGACTCTCTCCCTCCCTCCAGCTCCCAGTGCCCACAGCTGCAACCCCCAATTTCTAGGCAAGTCCGCGGTCCTCATTAGAGTATAGAAGAGCAGGCATTAGGTGAGAAACACTATGACAAACATGGAGGAGGATGAACAAATAGCAACAGATAATGTAACAAACAGCACCAGCACCAACACCAACCAAACAACTTTGTATTCTCCTCTACAACTAGAGGCAGAAGACGAGTACGGAGATGATGACGGAAACGACGATGTCGGAGATGAAGAAGAAGAGGAAGAAGAAGACGATATGAGTTATAAGATGAGATTCGAAGGCGAGATG…
LOC108204549	AAACGAAGAAGAAAAGAGACTCAGCTGCGGCAATTTGAGGCGCGAGCCCAGCACAACCTGCTCAGCTCCTCTCTGACTCTCTCCCTCCCTCCAGCTCCCAGTGCCCACAGCTGCAACCCCCAATTTCTAGGCAAGTCCGCGGTCCTCATTAGAGTATAGAAGAGCAGGCATTAGGTGAGAAACACTATGACAAACATGGAGGAGGATGAACAAATAGCAACAGATAATGTAACAAACAGCACCAGCACCAACACCAACCAAACAACTTTGTATTCTCCTCTACAACTAGAGGCAGAAGACGAGTACGGAGATGATGACGGAAACGACGATGTCGGAGATGAAGAAGAAGAGGAAGAAGAAGACGATATGAGTTATAAGATGAGATTCGAAGGCGAGATG…
LOC108219157	CCCTACTGTAGTTCGAACAACAGGTGGAGGTGGAGTAGACTCGCCGGAAACGGAAAGGCAGGCGGCCTGATTGAAAACGCGGCAACACTAGCCGGAAAATCGCGGCGGCAGTCGTCGGAGAATGACTGAGAAGACAGGAGGAATGAAGGAAGAGAGAAAAGAAGGGGAAAGGAAAGGAAGAGGAGAGTTGACGCGAGAGCACGAGAATTCGGGAGAGAAAGTGATGAGAAATTGAGGGAGATGAAATAGAGAAAGAGCA
LOC108226073	GAAAACATGAATGCCACCTTTACCACCTTGATCACTCTCCTCTCTGTTTTTTTATATATATGTTAGTCAATAGTCAATGACTCTCCCTCCCTCTCTTTCTCTCATTCTTTCCATTGTGGACTCTCCTTCTCTCGCAGAGTGTGTGAGGAAGATATAGAGTTAAGTAGGTGGATTAAGGGTAGATGGCAGCAGAAACAAGATCGCCCGTACCGTTGCTGTACCGGAGAAGATCAAGTGGGGAGATAATGAGGAATATGGCTTCTGTGTCCAGCAGTCTTTTGCCAGCTTTTGGCACTGTGGTTGGTGATGGATCTCCTCTTCTTCGTAGCTATATTATTGCTCCTTATGATCGCCGATACAGGTGGTGGCAAGCATTTCTAGTCATACTGGTCATATACT…
LOC108205611	TATCACGCGCGGAGGAGGGAGTGGGTCGCGATGCAAATTAGAATTCAAAATCAGCAGGGTGAACGAAAATGGTGAAGGGGCAAAACCTACCGGCCGATGTAACTCAACTTATCGATCAATTGGAACGCCATTGCTTGGCTCCTGATGGATCTCTCGTCTCCAAATCCGCCCACTATGATCTCCAACTCGCAAGAGAAGAAATGGCCACAGAGAGATTGCGCTATTTGGAAGCAATGGCTGTATATTGTGAAGCAAATGCAATGGTAGAGGATTACCAGCAGGCACTTTCCGTCGCTAGTCTTGGCAGCACTCGTGATATTCAGTCTCTATATCCTCAGCTTGGCTTGAAAAGCTCTCCTCAGGTTTATGAGACCCTTGAGCATCGTTTGACAGTTGCTG…
LOC108204730	CACTCTCACTCCTCCAATGGTCAGGGCAAAGACACAGTGAGCAATCTATACATGGGGTTGGGAAGCAAGGGCATGTCAGCTTCTTCACTAGACCAAGACCCCACTTTCTTAATCTTACTCATCAATATCAATACATACATACAAACGAGTCCTTGTTTCAATTATTGATCCACTCCACCACTCCATACGCTCTTCGAAAATCTTTAAAGTTAAGAGGCCCCCCCTTCTCAACAAGGTCTTAGCCATCACTGTTGCTTATAAATCTTTGGTACAAACAAGTCAACAAAAGCAGCAGCAGCAGCAGCAGCATTATTGTCACAAATTTTTATAACCCTTTTCTTTTGCTTCCTTTGCTCCCCTCCTGCATTCAGTTTGTGTGTGTTTTTTGTTCCCATTTTC…
LOC108207546	AATTCAAATTCACCGACTACACCCATAAAAATCCACCAAATTTATAGAATTTGGTGCCGAGACAAACCCTTATCAAATTTACAGTGTCGACTGAAGAATGGGTTGCTCAGCTCAATTCTCCTCCTCTGTAGCGATGATACTTACATCTTCCTGTAAGCAACAACAATTCAACTCTCTCCCCATTTCTTTTATTTCAAATCGCGCACACTTATCTTCTTCCCGTTGTGTGCTCACTTTTGGTCGCCGACGAGGCAAATCGTTTCCTTCAATAGCCAACAAAAAGAAGCCAAGTTTGCCCCAGACTAATATTGGGGAGGATGATGATTTGGATGAAGATGCTTTCGAAGCCCTCTTTCGTCAGCTGGAAGAAGATCTGAAAAATGATGATCCATCTGCACT…
LOC108209027	AAAGTTAGGCCTAACGAAATGACAAAGCTTATGGCAGCACCGTTGGCCACGTCACCCGTTCCTCCCCTGCCCTTGCATGTATCACAGGCTTTCTCGCTTTCTCTCTCTAGGGTTTCGCACAACTGCATTTCGTTCTTTCTGCTCTCACCACACTAATCCTCCCGCTCTCTCCAAACGCCCAGGACCTCTTGCACAATATAAGGCTCTTGTTGACCAAGGAAAGCTACAACATGATCCCTACCAAGAAACTATTGCTTCTGAGCTTGAAGATTTGGTCAAAAAATTAGAGAACTATGATAAGGAGATGGAGGAGTACCATGTAAGTTTGAGCAAATGGGAAGAGGCTAGGGAGACTGAAAGACGTAGGATTTTAGTGGAGGAAGCTGAGGTCAAGCAGGA…
LOC108204869	AAAAAGAGAATGAAGTCCGGCGTTGTTTAGTAAGATAACACAGACGAGCTTCGTATCGTGCGCCGCGTCTAAGTTGCAAACACGTACCGGCACCTTCACCTTCCAGTCTTCCACCTCACTGCTTCTTCTCTCCGTCTTGATTCTTCGCTCGCATCGATCTAATCTCCAATTTCTCTGTTCCATAAATATACACACATCCATCCATACATATATTCGATTTCAAATTATACACACATCCATCCATACATATATTCGATTTCAAAGATGCAGCGAAGAAGAAGCCCTCCCAAACACAGGCACGACGGCGCTTCACCTTTACCTATGGGCATGGATTGGAGTCCCAGTCCTCGCAATTTCACTGGTCGTGACACTGTTTGGCCACATGATCCTCGATCAGGA…
LOC108205289	ATCAGTTACCTGCATTTCCGGTGGGCCCACTTAATTAGAGCTTGGGGGCAACAGCTAAATGAAGCCACACAACTTAATCCTAACCCCGGGTCCTAACAGATTCTACGTACGTACATAGTATTACATAACAAGATTGTGTAATAAAATTGGGTGGTGAATGGTGATTTTCATCAATCATGATATTGTTGCGTCTGGGAGGTGTTATTACCACCAGCAAGTCAATCCACTTTCCGTGCTGCTCAATACAGTCTAGAATCACCCCAACCAACACTGAGAAGAATGGTCCTGATTTCGAGCAGCTCAAGTCGGAGCTCCGCGGTGGAGGAACCCCTGCTTCTGCTTCTGCTGCTGCAGCTCTTCGTGCTGATACCAACAATAGAGGAGGAGTCGAGGTGCCTA…
LOC108206895	CTTGGGCAAATCCAGTACTATAAATACATGTCCCTAATTCACAACTTGGGTACCACTCCTCTTGCTACAAAACTAGCCAGTATCTGCTTGCAAACTCCCGCATATATTTCTCAAACCTCAATACATTTCATGGCACTTCAAGAGTCCTTAGCTTTCACAGTTACAAGGCAATCGCCGGAGCTCATTACTCCGTCGAAAGCGACTCCACACGAGTACAAACTCCTCTCCGACATTGATGATCAAGAGGGTCTCCGGTTCCAGATCCCAGTCATTCAATTTTACGCCAAAAAAAATGATTTCGTGGATGCACGAAAAATGGACCCTGTCAAAGTCATCAGGGAGGCCCTTGCGAAAACTCTGGTGTTTTACTACCCGTTTGCTGGGCGGTTAAGGGAAGGC…
LOC108206895	CTTGGGCAAATCCAGTACTATAAATACATGTCCCTAATTCACAACTTGGGTACCACTCCTCTTGCTACAAAACTAGCCAGTATCTGCTTGCAAACTCCCGCATATATTTCTCAAACCTCAATACATTTCATGGCACTTCAAGAGTCCTTAGCTTTCACAGTTACAAGGCAATCGCCGGAGCTCATTACTCCGTCGAAAGCGACTCCACACGAGTACAAACTCCTCTCCGACATTGATGATCAAGAGGGTCTCCGGTTCCAGATCCCAGTCATTCAATTTTACGCCAAAAAAAATGATTTCGTGGATGCACGAAAAATGGACCCTGTCAAAGTCATCAGGGAGGCCCTTGCGAAAACTCTGGTGTTTTACTACCCGTTTGCTGGGCGGTTAAGGGAAGGC…
LOC108206904	GCTTTTAAGTTTTAGCAGTTGTGTACTATTATGACATGTTCGGTTGTCTGAAAATTATAAACCAATCTGGATGAAAATGGACAACAATTTCAACATAAACTTACAAACACATAATTTGGTATAACAACTTGCATAATTCTTACATAATTCTCACTCTCTTTTTAGCAATCAAATACTCTCACTAGACTTTAGACACACAAATTTAAGCAAATTCTATAGTGCTGATGTTATATGAACTGAAGTATTGTTGATGACCGATTGCTCATTCTTCTTCAACATGCCATCAAGTTCGGCTACAAATTTCTCCATTGCAAATGCTGGCAAGCAAATCGGTACCACGATTCCATTCTCACCCTTCTTGTTCTTGAATGGTATGTAAAAACTAGCCACCCCTGGAAT…
LOC108207978	CTTGGGCAAATCCAGTACTATAAATACATGTCCCTAATTCACAACTTGGGTACCACTCCTCTTGCTACAAAACTAGCCAGTATCTGCTTGCAAACTCCCGCATATATTTCTCAAACCTCAATACATTTCATGGCACTTCAAGAGTCCTTAGCTTTCACAGTTACAAGGCAATCGCCGGAGCTCATTACTCCGTCGAAAGCGACTCCACACGAGTACAAACTCCTCTCCGACATTGATGATCAAGAGGGTCTCCGGTTCCAGATCCCAGTCATTCAATTTTACGCCAAAAAAAATGATTTCGTGGATGCACGAAAAATGGACCCTGTCAAAGTCATCAGGGAGGCCCTTGCGAAAACTCTGGTGTTTTACTACCCGTTTGCTGGGCGGTTGAGGGAAGGC…
LOC108211556	CATTATGATACAATCAGGGCTTCATGTCGGTCACTAAAACATCAACTTCCTTTTGGTGTGCTAAGAGAATAGATAGGATAGGATGATAGTATGTTTATGTTATTGCATATCTGCATGTATTTTCTTCTTAGGATCAACTCCGGCAACCCTTGAGTTCTTCACTACATGTAAGAATACTCAGATTTAACCATTCAGCTACCATCACCACCTCCTCTACATCTTCTGTAAGCTCATGGAACTTATTCCTAACGATCACCTATCACAATTACATGTATCTTGGATTGAGATTGAATCGATTTTGCATTTGTATCCGCCAATGAGATTTGAAAATAGAGGTTTATCATGTTCTTCTAGTTCATATAAGAGCTTCACTTGAGATTTTGCTTGCACCCTGCAGTA…
LOC108204976	GACAGTTGACAGTGTCGACGAGAGGGATAGGATCAAGTATCAACAAGACAGCAAGTTGATGCTATGTACTACACTAGTATATTATTGTATGGTTTAGAAACACTTGAATATAATTCAACCACGTATCACACTTACTTTACTACTTGTAGTTCCTCCCACAATTATTATCTCAACATTTCTGTTCAATTCTGAGCAGCCCAGATCCTGATTTTGAACAAAGATGATCAGCCTACTGCTATTTTCTCCTCTGCTATTATCCAAGTGAACTTCTTGCAGGCCATAGAAACCAAACTATCTGCACATACATAAGGAATCATATATCATAACTATGTATGATCGTGCCGATAAAGGTAAGCAGCCAATGCATCCTAATCAATCTCTGTGGATGTCCCATTGGTC…
LOC108204976	GACAGTTGACAGTGTCGACGAGAGGGATAGGATCAAGTATCAACAAGACAGCAAGTTGATGCTATGTACTACACTAGTATATTATTGTATGGTTTAGAAACACTTGAATATAATTCAACCACGTATCACACTTACTTTACTACTTGTAGTTCCTCCCACAATTATTATCTCAACATTTCTGTTCAATTCTGAGCAGCCCAGATCCTGATTTTGAACAAAGATGATCAGCCTACTGCTATTTTCTCCTCTGCTATTATCCAAGAGTTATGTGAGGAAACCATTCAATTCTATTGAAGGGTTTTTAAAAAATGGAAGGCGATAGAGTAACAAGCCTGTGCTGCTAACCGTTTTTGGAGGGAAAACCAATCCTTTTAAACATTATGTACGCACCTAATATTT…
LOC108204428	TAAGAAAATAACACTACAAAAATTGGCAGCCATTATTATCCTCTAAAACCCTAATAAACCCCCCTCTTCCTCTCACTCCTCCGCAGCTTCTCTCTCAAAACCCTAAAAAAATGGGGAAAGTGAAAGGAAAGCACAGGTTAGACAAATACTACCACCTCGCCAAAGAACACGGCTACCGTTCCCGTGCCGCCTGGAAGCTCGTTCAGCTTGACGCCAAATTCACCTTCCTCCGCTCTTCTCGCTCCGTCCTCGATCTCTGCGCCGCCCCCGGTGGATGGATGCAAGTCGCCGTCGAGCGTGTCCCCGTCGGCAGTCTCGTCATCGGCGTCGACCTTGACCCGATCCGACCCATTCGCGGGGCCATTGGGATTCAAGAAGATATTACGCAGTCCAAATGTA…
LOC108205158	CTAACCCAACCCCCGGTTAAACCCTAGTCTTCCGCTATATAAACGCCCCTTCAACCCTCTTTCTCATTCGTGCTCTCCTTCACTCTTCTTTATCCAATCCCTCTTTTCAATACCCTCTTAAAATGGCAGAAGTTGAATACAGATGCTTCGTTGGTGGCCTCGCATGGGCCACTAACGATGAATCTCTTGAACAAGCTTTCTCTCAGTTCGGCGATATCACTGACTCCAAGATCATCAACGATCGCGAGACAGGGAGATCGAGAGGCTTCGGATTCGTTACTTTCAAGGACGAGAAGTCGATGCGCGATGCGATCGAAGGAATGAACGGCCAGGAGTTGGACGGCCGTAATATCACCGTCAACGAGGCTCAGTCTCGCGGAAGTGGTGGCTATGGAGGCG…
LOC108205158	CCAACCCCCGGTTAAACCCTAGTCTTCCGCTATATAAACGCCCCTTCAACCCTCTTTCTCATTCGTGCTCTCCTTCACTCTTCTTTATCCAATCCCTCTTTTCAATACCCTCTTAAAATGGCAGAAGTTGAATACAGATGCTTCGTTGGTGGCCTCGCATGGGCCACTAACGATGAATCTCTTGAACAAGCTTTCTCTCAGTTCGGCGATATCACTGACTCCAAGATCATCAACGATCGCGAGACAGGGAGATCGAGAGGCTTCGGATTCGTTACTTTCAAGGACGAGAAGTCGATGCGCGATGCGATCGAAGGAATGAACGGCCAGGAGTTGGACGGCCGTAATATCACCGTCAACGAGGCTCAGTCTCGCGGAAGTGGCGGTGGTGGCGGTTATGGA…
LOC108205158	CTAACCCAACCCCCGGTTAAACCCTAGTCTTCCGCTATATAAACGCCCCTTCAACCCTCTTTCTCATTCGTGCTCTCCTTCACTCTTCTTTATCCAATCCCTCTTTTCAATACCCTCTTAAAATGGCAGAAGTTGAATACAGATGCTTCGTTGGTGGCCTCGCATGGGCCACTAACGATGAATCTCTTGAACAAGCTTTCTCTCAGTTCGGCGATATCACTGACTCCAAGATCATCAACGATCGCGAGACAGGGAGATCGAGAGGCTTCGGATTCGTTACTTTCAAGGACGAGAAGTCGATGCGCGATGCGATCGAAGGAATGAACGGCCAGGAGTTGGACGGCCGTAATATCACCGTCAACGAGGCTCAGTCTCGCGGAAGTGGTGGCGGTGGTGGTG…
LOC108205158	TTCAACCCTCTTTCTCATTCGTGCTCTCCTTCACTCTTCTTTATCCAATCCCTCTTTTCAATACCCTCTTAAAATGGCAGAAGTTGAATACAGATGCTTCGTTGGTGGCCTCGCATGGGCCACTAACGATGAATCTCTTGAACAAGCTTTCTCTCAGTTCGGCGATATCACTGACTCCAAGATCATCAACGATCGCGAGACAGGGAGATCGAGAGGCTTCGGATTCGTTACTTTCAAGGACGAGAAGTCGATGCGCGATGCGATCGAAGGAATGAACGGCCAGGAGTTGGACGGCCGTAATATCACCGTCAACGAGGCTCAGTCTCGCGGAAGTGGCGGTGGCGGTTATGGAGGACGTCGTGAAGGCGGAGGCGGCGGTGGATATGGAGGACGTCGTGA…
LOC108205158	TTCAACCCTCTTTCTCATTCGTGCTCTCCTTCACTCTTCTTTATCCAATCCCTCTTTTCAATACCCTCTTAAAATGGCAGAAGTTGAATACAGATGCTTCGTTGGTGGCCTCGCATGGGCCACTAACGATGAATCTCTTGAACAAGCTTTCTCTCAGTTCGGCGATATCACTGACTCCAAGATCATCAACGATCGCGAGACAGGGAGATCGAGAGGCTTCGGATTCGTTACTTTCAAGGACGAGAAGTCGATGCGCGATGCGATCGAAGGAATGAACGGCCAGGAGTTGGACGGCCGTAATATCACCGTCAACGAGGCTCAGTCTCGCGGAAGTGGCGGTGGCGGTGGATATGGTGGCAGAAGAGAGGGAGGGGATGGAGGCTATGGAGGCGGTGGTGG…
LOC108205158	CCAACCCCCGGTTAAACCCTAGTCTTCCGCTATATAAACGCCCCTTCAACCCTCTTTCTCATTCGTGCTCTCCTTCACTCTTCTTTATCCAATCCCTCTTTTCAATACCCTCTTAAAATGGCAGAAGTTGAATACAGATGCTTCGTTGGTGGCCTCGCATGGGCCACTAACGATGAATCTCTTGAACAAGCTTTCTCTCAGTTCGGCGATATCACTGACTCCAAGGTCCGTTTTGTTGCTGGAATCGGATCGGATCGGATCCGATTCACACAGCCAGATGTCATCTCCATCTGATCTCTCACTCTACTGTTACTGTTTTACTGTTACTCTGTTACTGTCTTGATTCAACTGATTACTGTTACTACTCATTTTTGTTACTCGTTTTACCTCTTTCTCACG…
LOC108205158	TTCAACCCTCTTTCTCATTCGTGCTCTCCTTCACTCTTCTTTATCCAATCCCTCTTTTCAATACCCTCTTAAAATGGCAGAAGTTGAATACAGATGCTTCGTTGGTGGCCTCGCATGGGCCACTAACGATGAATCTCTTGAACAAGCTTTCTCTCAGTTCGGCGATATCACTGACTCCAAGGTCCGTTTTGTTGCTGGAATCGGATCGGATCGGATCCGATTCACACAGCCAGATGTCATCTCCATCTGATCTCTCACTCTACTGTTACTGTTTTACTGTTACTCTGTTACTGTCTTGATTCAACTGATTACTGTTACTACTCATTTTTGTTACTCGTTTTACCTCTTTCTCACGATCATCAACGATCGCGAGACAGGGAGATCGAGAGGCTTCGGATT…
LOC108205158	TTCAACCCTCTTTCTCATTCGTGCTCTCCTTCACTCTTCTTTATCCAATCCCTCTTTTCAATACCCTCTTAAAATGGCAGAAGTTGAATACAGATGCTTCGTTGGTGGCCTCGCATGGGCCACTAACGATGAATCTCTTGAACAAGCTTTCTCTCAGTTCGGCGATATCACTGACTCCAAGGTCCGTTTTGTTGCTGGAATCGGATCGGATCGGATCCGATTCACACAGCCAGATGTCATCTCCATCTGATCTCTCACTCTACTGTTACTGTTTTACTGTTACTCTGTTACTGTCTTGATTCAACTGATTACTGTTACTACTCATTTTTGTTACTCGTTTTACCTCTTTCTCACGATCATCAACGATCGCGAGACAGGGAGATCGAGAGGCTTCGGATT…
LOC108205158	TTCAACCCTCTTTCTCATTCGTGCTCTCCTTCACTCTTCTTTATCCAATCCCTCTTTTCAATACCCTCTTAAAATGGCAGAAGTTGAATACAGATGCTTCGTTGGTGGCCTCGCATGGGCCACTAACGATGAATCTCTTGAACAAGCTTTCTCTCAGTTCGGCGATATCACTGACTCCAAGATCATCAACGATCGCGAGACAGGGAGATCGAGAGGCTTCGGATTCGTTACTTTCAAGGACGAGAAGTCGATGCGCGATGCGATCGAAGGAATGAACGGCCAGGAGTTGGACGGCCGTAATATCACCGTCAACGAGGCTCAGTCTCGCGGAAGTGGTGGCGGCGGTGGACGTCGTGAAGGCGGTGGTGGCGGCTATGGAGGCGGTGGTGGTGGATCCAG…
LOC108205158	CTAACCCAACCCCCGGTTAAACCCTAGTCTTCCGCTATATAAACGCCCCTTCAACCCTCTTTCTCATTCGTGCTCTCCTTCACTCTTCTTTATCCAATCCCTCTTTTCAATACCCTCTTAAAATGGCAGAAGTTGAATACAGATGCTTCGTTGGTGGCCTCGCATGGGCCACTAACGATGAATCTCTTGAACAAGCTTTCTCTCAGTTCGGCGATATCACTGACTCCAAGATCATCAACGATCGCGAGACAGGGAGATCGAGAGGCTTCGGATTCGTTACTTTCAAGGACGAGAAGTCGATGCGCGATGCGATCGAAGGAATGAACGGCCAGGAGTTGGACGGCCGTAATATCACCGTCAACGAGGCTCAGTCTCGCGGAAGTGGTGGCGGTGGTGGTG…
LOC108205158	TTCAACCCTCTTTCTCATTCGTGCTCTCCTTCACTCTTCTTTATCCAATCCCTCTTTTCAATACCCTCTTAAAATGGCAGAAGTTGAATACAGATGCTTCGTTGGTGGCCTCGCATGGGCCACTAACGATGAATCTCTTGAACAAGCTTTCTCTCAGTTCGGCGATATCACTGACTCCAAGGTCCGTTTTGTTGCTGGAATCGGATCGGATCGGATCCGATTCACACAGCCAGATGTCATCTCCATCTGATCTCTCACTCTACTGTTACTGTTTTACTGTTACTCTGTTACTGTCTTGATTCAACTGATTACTGTTACTACTCATTTTTGTTACTCGTTTTACCTCTTTCTCACGATCATCAACGATCGCGAGACAGGGAGATCGAGAGGCTTCGGATT…
LOC108205158	TTCAACCCTCTTTCTCATTCGTGCTCTCCTTCACTCTTCTTTATCCAATCCCTCTTTTCAATACCCTCTTAAAATGGCAGAAGTTGAATACAGATGCTTCGTTGGTGGCCTCGCATGGGCCACTAACGATGAATCTCTTGAACAAGCTTTCTCTCAGTTCGGCGATATCACTGACTCCAAGATCATCAACGATCGCGAGACAGGGAGATCGAGAGGCTTCGGATTCGTTACTTTCAAGGACGAGAAGTCGATGCGCGATGCGATCGAAGGAATGAACGGCCAGGAGTTGGACGGCCGTAATATCACCGTCAACGAGGCTCAGTCTCGCGGAAGTGGCGGAGGCGGCGGTGGATATGGAGGACGTCGTGAAGGCGGTGGTGGCGGTTATGGAGGCGGTGG…
LOC108204748	TGATCCTCTGACAATAAACAAGCATCACATCTTTTACTTAGAAAAGAAGTATTTAATGATAAATGTCAAGACTTTCCTGGTAAAATCAAGTCCAAACGCGGTTTGATAAACAGACATGGTCCTTGTCTCCTACACCGAGTCTTAGACTCTTCCACTTTCCTGTCTTGTTAGAAGATTTGTTCCGGAAAAGGCTGTAGATTTTGATGTCGATGATGAGTACAATGTGGAGTACTCTTTTGCCATGGAGTACAAGGGCCCTGCTGTCAGTTACACTATTCCTCGGGTGGATCCTCTGAATGTTGATTGTATACCTATAGCAGCTAGAGTTTCCACACGTGGTGTGGGTGAAAATTTGTCACTTCCAGTTGTTCGGCCTATTGTTAAAGCTGATTATTTGAA…
LOC108203087	TTCACATTTGATGAGTTTCAGTGTCAACTAATCAAAGAACAAGGAAGCTCACTTGAAATAATAATTCACTGCTTGAGATTGAAAGTTTGTCCATTGACAGTCAGAGTTTGTACTTTTTATAATTCCTGTTTCAGTTGTTTTGCCAAATTTAACATTGAAAGTTTGTATGGCGTGCTTAAATTTTTAACTATCCCTATGTTAATCTGTAAAAGATTGTTACTTTTCAAGCTCTGGCACTAACTTATATTACTATTTCACATCTTCATTTTATGTGTCTTGACTAGATAATGGGGCTAAACCCACCTTTTGGTGTCAAGTCTGCTCTTGCAAACAAATTTATCGATAAGGCTCTCAAATTTAGGCCGAAACTTATTGCTCTTATTGTTCCTCCAGAGACTG…
LOC108204890	CAACCGAGCCCACACTCGTGATTCCATCCGAGTCCAGTCCACCCAATCCAACGGCCACGATTCAAAGGAGGCGTAAAAACCAATGACAAAATTCGCATCCAACCAGATCCATTTCAATCCCCTCCCCCTCTCTCTACAATTCACCCCGCCCTAGAGAGAGAAATCCACCCTACCGGAAAATGATGTCATCAAACCCCGCCGCCGGAGAACTAACTCCACAGCAGCAGCAACAACAGCAACAGTGGCTGGCGATGCAGCAACAGTACCACCAACAATGGCTGGCGATGCAGCAGCATCAACAGTTGATGTACCAGCAGCAAGCGCCTCAGTTCATGCCTTATTATCAACAACAACAAGCGGCTCAGATTCAATCGTCGAGTGAGGAAAACAAGACTCTCT…
LOC108204444	GAAACCCTCATTTCCTCTTATTCTTATGTCAGACTCCCGCTACAACTGACAAATGTTGAGAGCCGCCCTTCGCCGGTCTTCCCTTCCGGCAAGACTACATTCTCACCGGCGATCGTTTCTCCGGCAACATCCGAGACTCATCCCAACAGCTGAACCTCCTCCATTAAATGCACATTTTCGCCCTCTCTTTACTCGCTCTGTTGCAACTTCTGCCCCTCAATCTTCTCCAGATGTTTATGATGCTCCGGAGAAGCTCGGGTTTGACAAAGTTTCGGAGCAGTTCATCGAAGAGTGCAAGTCGACATTGGTTTTGTTTAAGCATAAAAAGACGGGTGCTCAAGTTATGTCTGTTTCCAATGACGATGAGAATAAGGTTTTTGGTATTGTTTTTCGAACTCC…
LOC108204808	TTATTCACAATTATATAATACACCCACCCATACCCAAACCATATGTATATAACCACGCCCATCCTTACACAAAACACATGTACAGAGTACAGTACTGGGTTTTAAGTTCGACTCAAACACAAGCAACACATACATACACACATAGTAATAACATACAATGTTGGGTTTGTTAGCAAGAAGAGGGGCATCTTCTAGTTGTTTTTTTCGAAGAAAAAGTAGATTTTTTTCTTCTGGGATTCTTCCTGATGGAGTTGATCGAGCTTCTGAAGCTTTTTCTCGCAATTCTGAGATCATGGCTGGCCTTCTTTCTCAACTTCAGTCTCGAATCTCTAATGTAATGGAAGGAGGGGGAGCTGCAGCTGTGGAGAGAAACAAGAGCAGGAATAAGCTTTTACCTAG…
LOC108204948	TTAATAACGATGATATTATATCTGTGTCAAACGAGATCATATTAGTTGTAAGAGTATAAAGATTATTGTAGTTCTATAGAATGTGCTATTAGAGGAATAATTGGAAGAAGAAAGAAACATAGAGATAAAATATATACACAAACTATGATTTACACAAGTAACACAACACCACAATATCATAAAACCAGGCCACAAAGGGTGCTTCTCATTCTACCTTTTAGTTCCTTTCTTCTCAGCTTTTTTTCTTTATTCAACAATACAGCAAGTAGTTATCAGTTAAGTATTCGGCGTGAAGTTAAAGAGTCACAATCCATAACACTTGTAAGGTTTTAGTTTCTGTTCAGTTAAAGATGTTCCTGCCTAGTGCTGATTTCGTGTTGCTAATCTTGCCATGGGACA…
LOC108205420	TTCCCTTTCATCTTTTTCCCTCCCCACCGCTTCCTCCACTTCCTCACCATGTTCAAAATTAAAAGTATTAAATTTTATTTTTAAAATTTGAAACTTAAAAATTCTAAAACATTTTTTTACGAAAGATATTTAACTGGAAAATAATTTGATTTTTCAATACTGATATATCTTACCAGATAGAAACATTTTCAAAAAAATCAGAAAAATCGTCATCCCACCGCGTTAACTTTTGGCATGTTTTTGCAGCGTCCAACCACACGCGCCGCCGGCCACTTTCGGACCCTCACCACTACCAGTATTCCCATCTCCTCTGCTTACCCCACCTCCGAATCCACCCATCTTCTCCACAAGTTGCGTGATCTTTGCACGCGCCATCATCTCCAAGAAGCCATCACTCTA…
LOC108205420	TTCCCTTTCATCTTTTTCCCTCCCCACCGCTTCCTCCACTTCCTCACCATGTTCAAAATTAAAAGTATTAAATTTTATTTTTAAAATTTGAAACTTAAAAATTCTAAAACATTTTTTTACGAAAGATATTTAACTGGAAAATAATTTGATTTTTCAATACTGATATATCTTACCAGATAGAAACATTTTCAAAAAAATCAGAAAAATCGTCATCCCACCGCGTTAACTTTTGGCATGTTTTTGCAGCGTCCAACCACACGCGCCGCCGGCCACTTTCGGACCCTCACCACTACCAGTATTCCCATCTCCTCTGCTTACCCCACCTCCGAATCCACCCATCTTCTCCACAAGTTGCGTGATCTTTGCACGCGCCATCATCTCCAAGAAGCCATCACTCTA…
LOC108205420	TTCCCTTTCATCTTTTTCCCTCCCCACCGCTTCCTCCACTTCCTCACCATGTTCAAAATTAAAAGTATTAAATTTTATTTTTAAAATTTGAAACTTAAAAATTCTAAAACATTTTTTTACGAAAGATATTTAACTGGAAAATAATTTGATTTTTCAATACTGATATATCTTACCAGATAGAAACATTTTCAAAAAAATCAGAAAAATCGTCATCCCACCGCGTTAACTTTTGGCATGTTTTTGCAGCGTCCAACCACACGCGCCGCCGGCCACTTTCGGACCCTCACCACTACCAGTATTCCCATCTCCTCTGCTTACCCCACCTCCGAATCCACCCATCTTCTCCACAAGTTGCGTGATCTTTGCACGCGCCATCATCTCCAAGAAGCCATCACTCTA…
LOC108205420	TTCCCTTTCATCTTTTTCCCTCCCCACCGCTTCCTCCACTTCCTCACCATGTTCAAAATTAAAAGTATTAAATTTTATTTTTAAAATTTGAAACTTAAAAATTCTAAAACATTTTTTTACGAAAGATATTTAACTGGAAAATAATTTGATTTTTCAATACTGATATATCTTACCAGATAGAAACATTTTCAAAAAAATCAGAAAAATCGTCATCCCACCGCGTTAACTTTTGGCATGTTTTTGCAGCGTCCAACCACACGCGCCGCCGGCCACTTTCGGACCCTCACCACTACCAGTATTCCCATCTCCTCTGCTTACCCCACCTCCGAATCCACCCATCTTCTCCACAAGTTGCGTGATCTTTGCACGCGCCATCATCTCCAAGAAGCCATCACTCTA…
LOC108205420	TTCCCTTTCATCTTTTTCCCTCCCCACCGCTTCCTCCACTTCCTCACCATGTTCAAAATTAAAAGTATTAAATTTTATTTTTAAAATTTGAAACTTAAAAATTCTAAAACATTTTTTTACGAAAGATATTTAACTGGAAAATAATTTGATTTTTCAATACTGATATATCTTACCAGATAGAAACATTTTCAAAAAAATCAGAAAAATCGTCATCCCACCGCGTTAACTTTTGGCATGTTTTTGCAGCGTCCAACCACACGCGCCGCCGGCCACTTTCGGACCCTCACCACTACCAGTATTCCCATCTCCTCTGCTTACCCCACCTCCGAATCCACCCATCTTCTCCACAAGTTGCGTGATCTTTGCACGCGCCATCATCTCCAAGAAGCCATCACTCTA…
LOC108205420	TTCCCTTTCATCTTTTTCCCTCCCCACCGCTTCCTCCACTTCCTCACCATGTTCAAAATTAAAAGTATTAAATTTTATTTTTAAAATTTGAAACTTAAAAATTCTAAAACATTTTTTTACGAAAGATATTTAACTGGAAAATAATTTGATTTTTCAATACTGATATATCTTACCAGATAGAAACATTTTCAAAAAAATCAGAAAAATCGTCATCCCACCGCGTTAACTTTTGGCATGTTTTTGCAGCGTCCAACCACACGCGCCGCCGGCCACTTTCGGACCCTCACCACTACCAGTATTCCCATCTCCTCTGCTTACCCCACCTCCGAATCCACCCATCTTCTCCACAAGTTGCGTGATCTTTGCACGCGCCATCATCTCCAAGAAGCCATCACTCTA…
LOC108205420	TTCCCTTTCATCTTTTTCCCTCCCCACCGCTTCCTCCACTTCCTCACCATGTTCAAAATTAAAAGTATTAAATTTTATTTTTAAAATTTGAAACTTAAAAATTCTAAAACATTTTTTTACGAAAGATATTTAACTGGAAAATAATTTGATTTTTCAATACTGATATATCTTACCAGATAGAAACATTTTCAAAAAAATCAGAAAAATCGTCATCCCACCGCGTTAACTTTTGGCATGTTTTTGCAGCGTCCAACCACACGCGCCGCCGGCCACTTTCGGACCCTCACCACTACCAGTATTCCCATCTCCTCTGCTTACCCCACCTCCGAATCCACCCATCTTCTCCACAAGTTGCGTGATCTTTGCACGCGCCATCATCTCCAAGAAGCCATCACTCTA…
LOC108205420	TTCCCTTTCATCTTTTTCCCTCCCCACCGCTTCCTCCACTTCCTCACCATGTTCAAAATTAAAAGTATTAAATTTTATTTTTAAAATTTGAAACTTAAAAATTCTAAAACATTTTTTTACGAAAGATATTTAACTGGAAAATAATTTGATTTTTCAATACTGATATATCTTACCAGATAGAAACATTTTCAAAAAAATCAGAAAAATCGTCATCCCACCGCGTTAACTTTTGGCATGTTTTTGCAGCGTCCAACCACACGCGCCGCCGGCCACTTTCGGACCCTCACCACTACCAGTATTCCCATCTCCTCTGCTTACCCCACCTCCGAATCCACCCATCTTCTCCACAAGTTGCGTGATCTTTGCACGCGCCATCATCTCCAAGAAGCCATCACTCTA…
LOC108205420	TTCCCTTTCATCTTTTTCCCTCCCCACCGCTTCCTCCACTTCCTCACCATGTTCAAAATTAAAAGTATTAAATTTTATTTTTAAAATTTGAAACTTAAAAATTCTAAAACATTTTTTTACGAAAGATATTTAACTGGAAAATAATTTGATTTTTCAATACTGATATATCTTACCAGATAGAAACATTTTCAAAAAAATCAGAAAAATCGTCATCCCACCGCGTTAACTTTTGGCATGTTTTTGCAGCGTCCAACCACACGCGCCGCCGGCCACTTTCGGACCCTCACCACTACCAGTATTCCCATCTCCTCTGCTTACCCCACCTCCGAATCCACCCATCTTCTCCACAAGTTGCGTGATCTTTGCACGCGCCATCATCTCCAAGAAGCCATCACTCTA…
LOC108205239	ATTAAGTTTTCGCATCACTAACATGGCACCATCTTACTTTCTCTCCCTAAAGAGATTCATCAAACAAAAGACTGGAATTATAAAAAATATAAAATAAAACAAAGATATTGTATTTACGACCACCAAGAAAGCTGATGATCGGTGAAAACTCGACCATTTGTGAAAGTCAATCGGAAAAATATTCATTAGACATGGCTATTGATATCCAAACCATTGAAAGAAGGTACATTGTTTCGTGCCATCAGCAAGGGATTCCACCGAATAAATCAATTTTGTTGGCATTGTTTAAGGCTAAGGTCAAGAAAAGCCATCATGAGGTTTGTAACCTTGTAATATGCATGGATGATGTGAAGGATGTAGATTTTAATCCACTTGTTAGATTACTTATGGAAATTGATG…
LOC108206932	CCCAAATCTTCATACAATCTATTTAAAAAAGGTATGATTAATGAAATATGTATCATTAATGGTAGTTATTCTAAGATCTTTACATACATGGAAACAATTTAAATAGTATATTATAAAGAACTGTAACTGTGATTTTGATGGTAATTAATCCGCATAATTATGGAAGTACAATTAACAAAATCGTATGATTAATGTATGCATAATGCGTATTTTTAAAATATAATATACTACCCCTAGAGTTTAAACAAGGAAGTATACCAGTAATTATTTCAACTTTCAGAGCGAAAAGCTGCAGAAGTCTAACATGGACATTGAAACAGATTCGATGCTGACGGTGAAAAGAAAATTACTCATAATATATTGAATCAATTATTCATGAGAGACTCTCGTCTGATTACC…
LOC108205326	GTACATTTTAAAGGCAAAACCAGGAGCAGTAAACAATACACATCCAAACACGCCCTTACTAAATCTCATTCTTTCTCCCTTGCAAATAATTAAAGATCGGACTCATCACATTTTGTATACTTCTTGCGAAACATGTTCCGAGACACAGGCTTTTCTTACATTAAATCCTGTTGGGTCATCTTCATTTCACTTGGAAAACATCACCATCTACAATAATTCTATCAGTCGCACTTCCAATTTGGTCAAAACCAAGAATTGCTTAGGAACTGCAACCTGGGGGTTCTTCGATTCAGCTTATTAATCGGTAGGAACTGAGGTTACTGTTGGTTCTCCAAGTGAAATTGTGTTGTTGGATAGCATTTAGAGTTGAAGAACCGGGACTTTCTTTTACTTTTTGTT…
LOC108205326	GTACATTTTAAAGGCAAAACCAGGAGCAGTAAACAATACACATCCAAACACGCCCTTACTAAATCTCATTCTTTCTCCCTTGCAAATAATTAAAGATCGGACTCATCACATTTTGTATACTTCTTGCGAAACATGTTCCGAGACACAGGCTTTTCTTACATTAAATCCTGTTGGGTCATCTTCATTTCACTTGGAAAACATCACCATCTACAATAATTCTATCAGTCGCACTTCCAATTTGGTCAAAACCAAGAATTGCTTAGGAACTGCAACCTGGGGGTTCTTCGATTCAGGTTTTCTGTTTGGTCAGTGTGGAGGCTTTTGGAGTCGAAATGGTGGCCAGTGAAAAGTTTACTCGAGTAGATACTGTAGAGCTGAAGGATGTTATGTGCAGGAAGA…
LOC108205326	GTACATTTTAAAGGCAAAACCAGGAGCAGTAAACAATACACATCCAAACACGCCCTTACTAAATCTCATTCTTTCTCCCTTGCAAATAATTAAAGATCGGACTCATCACATTTTGTATACTTCTTGCGAAACATGTTCCGAGACACAGGCTTTTCTTACATTAAATCCTGTTGGGTCATCTTCATTTCACTTGGAAAACATCACCATCTACAATAATTCTATCAGTCGCACTTCCAATTTGGTCAAAACCAAGAATTGCTTAGGAACTGCAACCTGGGGGTTCTTCGATTCAGGCAGGTTTTCTGTTTGGTCAGTGTGGAGGCTTTTGGAGTCGAAATGGTGGCCAGTGAAAAGTTTACTCGAGTAGATACTGTAGAGCTGAAGGATGTTATGTGCAGG…
LOC108204392	GGAAAGAAACTGGCATAATTAATGCATTTGAACATCAGGTTTGCTTGCCTCTAGCATCTATTGCATATGTTAGTTATGAATGTCAAAACTGGAGTTTAAGTCGTGGATCCATCTTAATGTGGAATGGCCAAATACAAGTCTTCACTTGTCTTATAAAGACAAAGCTCTTTTTATTTCATATAAAAGATGTATTACATTGCAGGTCTGAAGCTGATATTGTCAATGATATAGTTGAGGAGAGTCTACTACTTTTACACACAGAACCCACTGCTTTAGATGTTGCCAAATATCCAGTTGGGTTGGAATCCCGCGTTAACGACATAACAGCAGCATTGTTGAGCAGCGGCACAAAAGGTGTCATTAAGATCGGGATATATGGTATGGGTGGCGTAGGCAAAA…
LOC108204392	ATTTGAAATCCCTAAAAAGCTCGTAAACGACGCAGAGGTCTGAAGCTGATATTGTCAATGATATAGTTGAGGAGAGTCTACTACTTTTACACACAGAACCCACTGCTTTAGATGTTGCCAAATATCCAGTTGGGTTGGAATCCCGCGTTAACGACATAACAGCAGCATTGTTGAGCAGCGGCACAAAAGGTGTCATTAAGATCGGGATATATGGTATGGGTGGCGTAGGCAAAACAACTCTTGCCAAGGCACTTTTTAATAAACTCTTGCTAGGAAGCTTTGAAGGAAGCTGCTTCCTCGAAAATGTGAGGGAAAATTCGGGGAATATAAAAGGCCTAGCGTCTTTACAACAACAACTCATTAGCGATGTTCTTAAAATTAGTAAGGACGAAGTTAAAG…
LOC108204392	ATCATGGGACCCTTGTTTAAAACAAATTAGCAAGACTTTGAACTTTCTGATTAGCAACTTGTATAACAGTCAATATTGAGCAGCCGTATTGCAAAGTTGAAGCTCTCATCTTTTGTTTCAAATTTCCTTCCTTCACACAACATCTTTTGTACCATATATCTTTGCTATCCTCCAGTACAATATCCCTGCTACCATATACATATATCTAATGGCTTCAACAAGTTCTCAAACTCCCGCTAGCTGGGACGTTTTCTTGAGCTTCCGTGGCATAGACACTCGACTTGGTTTCACCAGTCATTTATACTCTGCCCTGGATCACAATGGTATTTGGACTTTTATGGATGATCCTGAGCTACGCTGTGGAGAAGTTATCTCAGCTGCATTGCTCAAAGCTATTCA…
LOC108205394	TTATTTTTTTTTATATTATTTACATGTACCGATCGATCTCTTCGACCCTTCTTCTTCCCTTCCCTGTACCATTCACTCTTCACTCTGAAACTCAAATTGAGAGTGGAAGTCTTCTTATCTTAATTTGGAAGATTTGTCTTGCAAGTATTTGAATACCTGCCGAAGATGGAAAATGCATTTTAAAGGGTGAAAATTGATGAGGTGGAATTTGCTGACAAGAAGCTGCAAGATAATTCTTGCTGAGCAAAGAGCGGTGCTGAGATTTGATATCTAAAGCACAAGAAGTCTTGGGGCAGGTTAGAGGAAGGATAGGCTGGATGGACAACTAGAGATTTTGTTTGATCTGAATGAGAACTTAGTGACGATGAAACAATAGCATTGAGTGTATCTGCAGTAAGC…
LOC108204992	CAAATTTGTTTCCAATCCTTTATGTACAAGAGTGAGAGAAGCCCTAGAGGCTAGAGCTGAGCAGTGTTGGTTTTCCCCGTTCCTGAAAATTTCAGAGGCCTATACTCTCTCCTCTCTCTTACTCCTATGTCTCGCCGAGAACATGGTCGAGATTCTGATTCCAGACGACACCGTTCGAGATTTGATCGAGAACCCAGTCCTAAGAGAACAAGAAGGGATGATGAATCAGTCACTGAGCGATCATCTAGCAAGCTTAAAGTGGGAGCTGAAGAATTTCAAGATCATGATCGGAAGCACCCACGCCGTCTGCAAGATGCTGTACCTCTTGATGCTCCATTAGCACCTGATGCAAAGGAGGAGGGCGAGTTTGTTGGAAAGGATGCTGACAAGAAAACTGAT…
LOC108216051	GCCGAGATACAGCATAGAGACAACGAGAGGAAAATAAAGAATCAAAGAGGGGTTTTCTCCATCTGTCATTTTCTCAAGGGTGGTCCACTCAGGAGAGGGAAGAGTTGAATCTCTTCCCATTCCCACTCTGGCAGCAGCAGCAGCAGCCAGCCACCCACCTCTTTACCCTCTTCATCAGCTCTTGATTTCTGTGGGGATTCTTGATTCTTGGAACAGATTGGATTGCTGTAAAAAAGTGATTTTTTTGATATCTGGGAAAGATGGACAGCAGGATTCAACCTGGTAGCTTTTTTCAGTATTCTCCTACTGGAGTCCATGGAGTTCCTGGCCCAATGCAGAGGTCTTCATCTCCTTCAGATCGTGAGAGATATCTATCGGAACTATTAGCAGAAAGGCAAA…
LOC108204755	CTCATTTTATTGGTTTCATAATGCCGAAGAGTAACAATCTGTCACTATTTGATTTAATTAGTTTTAGTAAACATAATTTATTGAATTTTAGTATCTTTCCCAAAAGGCTTTATATGACTAATGATGAGAGATAGGTAGGGAATTAGACCATTCTACTCGTATCTTGAAAATTTGAAATTTTTACTTTCTTAACCTGCTTATGTTGTCAGGCCTTGTAATGATCTGCATTACCGATGGTTTAGAAAGGAACTAATGTGTTTGTCTCTTTCTTAAGTTGTAGATGGCTAGTACAGTGCAAGCAGTGGCTTCTGTAGTAACTGCAGGAGCCGAAGTTGCTGGAGTATTACCCACAGTGACGTTTCTCTCCCCAGAGAATGTGAAGGCGATCTATAAAGAACT…
LOC108212074	CAATCCACCCTTTTCTAACCTCTTTTATCATCTCTCTCCCTCTCTCTCTCTCTCTCTCTCACCCTCCCTCTCCCTCTCTCTCTCTCTCGTTTTAGTTTCTTGATTTGTTCTCATCTCTTTTGTCACCCTCTCTCTTGCAATCCCCTGATTCTGTGCTTCCAAGGGGAAATAAACAAGAAGATGGCAGCTACTTACAACACAAATGGAAACGACACTGTTGCTGCCCGTGATCACGAGTCAAACTCAGCAGAAAAGAAATATGGAGAAATAATGCCAAAGAAGAAGCCTTTAATCTCCAAGAATCATGAAAGGGCCTTCTTTGACTCGGCAGATTGGGCGTTATGCAAGCAAGCTGCAGGAGTTGATCCGATATCGTCTGTGTATATAGAGAATTTGCAG…
LOC108200952	TGATGAGTAAACAAAGGAGCCAAACAAGGCCTCACAAGATTATCTTCTTGCACTGCACTACAGCTATAATACAGTACAACACAATACATACACACAATATAGATACAGAGAGAGAAAGCTGTACTGTAAAAAATGTAAAAGTTGCAGGGGTCATGTCGGCTTCAACCAGGCAAAGACTATAATCTCTCTCATATTTCTCTCTCAAACCCTAATTATTACTCACAAAACCCCTTTTCTTTGCTTTCACATTCACCTCTTTTTTTAGAATTTCACCTAAAAAAGTGAACTTTTCTTGATTGTGATGGATTTGAGATTCTGGGTTGTAGTTTGATTCTTGTTTAAGATATTGAGAGGAGCTCTGCGAATTTAAGTTCACTTAAAGAGATATCGAGATATCGT…
LOC108204432	GTTGTAGTACTCTCAACAACATAATAACATATTTGTCATTTTCTCCCTTGCTTTTTTAACTTGAGACTTGCAAAGAAGCAATGGAGATGCAGGAGACATCAAGAAATGAACATAAAGGAAATATTACTAGTGATAATACTCTTGATTGGAGAGGAAGGCCCTCAAACCCTAAGCTGCATGGTGGAATGAAAGCTGCTTCATTTGTCCTAGGAGTCCAAGCTTTTGAAATAATGGGAATAGCAGCAGTTGGAAACAATCTGATAACATATGTCCTAAATGAGATGCACTATTCATTGTCAAGATCAGCAAATATTGTCACCAACTTTATAGGAACTCTCTTCATCCTTGCACTACTTGGTGGCTTCCTTTCTGATTCTTACCTTGGCTGCTTTTGGACCA…
LOC108204433	GCGTTTACTTTGTCATGCTACCTCTTGTTCAGATGGTATCTCGACCTCGACCATTATATATAGCAGGCTGTCCGTGACAATGATGAAAGAACGCAACTTACTAGTTACTAGCAAACATCATTCTTTCTTTGCTCTCTTGTTAGCTCTTTGGTTTAATCAAAATGAAGGCCTGGATATACGGTGAATATGGTGTGTCAGGAGATGTTTTAAAATTCGAACCCGAATACAGTGTTCCTGAGATTAAGGATGATCAAGTTCTTATCAAGGTTGAGGCTGCTGCTCTTAACCCCGTCGATTATAAGCGTATGCTTGGTTGGTTCAAAGGCATCGACTCCGCTTTACCTCATGTCCCTGGATTTGATGTAGCTGGAGTGGTGGTTAAAGTAGGAAGTAAAGTTA…
LOC108227405	ACCCCGAAATTACCTCCCATACGTTGGGATTGCTAAAACGCGGCCAACCCGATACGTTCGGACCCGACATACAATACCTGGTTTTCCCACAAAACAGTAAAATCAGAAAATTAGGTTAGCAAAATTCGATACACAAATCAATTCTCCCCTCATCGAAAATGGCAGCATCTACTAGTGGCGGTGCTTACAGATCCAGGTTGCTCAGGAGATCCATTCAGAAGCAAAATTTCAGAATGATGCTATTAACCAGCTGCAAATGCTTCTTATTAAAGCTCAAGCCGGAGTGAAGAACAATGTGAGGAAATTGAACAAGAGTATTGTCCAGAGCGGGTCTAGTCATGTTGTGCATGTGATTCTCTTCGCCCTAGTTTTGTTTTTTGTAGTCTACATGATATCCAA…
LOC108206607	CCCTCCAATGTAAACAATTGAGGGGGACGGAGGGAGTAACTAGTAAGTGAAAGTACAGTAACTTCTTTTGACGAGATTGTAAGTTGTAACTCTGTCAGTGTCAGAAGCCCCGAATCCCCAGCTCTCACTAGGTGATCATGAGAACCTCGTACCCTCCCTTTCTTCCGAAACCCATCGTCCCACCGCCGGAAAATGAAGTGGACCCCACACGAACCACCATCCCCAACCACCGTAAAAAACCCACCAGCAAACGCCCCTGGCTAGTCCTCGACTCAACAGGCCAAACCCAAGTCATGGAAGCTGGGAAGCACGCTTTAATGCGCCTCACTTTCTTGCCTGCTCGTGATCTTCGGATTCTTGATCCATTACTCTCTTACCCTTCTACTATTTTGGGCCGAG…
LOC108204815	TCCATGTCACTGCAAGTATATATACAGGCACAGCAGATACAGTATTACAGTTTTGTTTCACTCCGTCTCCTCTTCGCGATTTCTATTGAAGTACATATTTCTCTTTCTCTCTCTCTATCTCTCTTTGTTGTGTTGATTTCTGTAAATTAGAGCTCAGATCCAGCTTATGTGATCCGATCTACATTTAATTTTGTAATCAACCAATCATCTTCTTGCTAAGATCCCAACATTAACCTCTCTCTGTTTCGTTTCTATCAATTCGTCGTCGTTTTGTTATATATTTACCGGATCTGATTCTCCGTTTAAATTGTGAGTGTATGCAGGTCTGTTGAATTTGTAGCGGTCGATTTACGATTAGATCAAGATGGTTGTTCTCGCAGCTTCGATTATCAGTAAATC…
LOC108204750	AGGGGAGAGGGACCGTCGGATCGGAAGCAAGGGTTTTCATTAACACACACATAAAATATGTAATGGAGACCTTTCTAAAAATTCACTAAACCTCAACTTTTGTCGTCTTCTCCACCATTGCACTGCTGTCACTAGGTTTGTGTCTTCTCTTCGTAAGTACATTTTGTCTTTCTCTTCAACGTAATTTAGTTTGTCTGATGTTATGATGATGTTTTTGATAATCATGTGTTTGGTTATAATTTTGAACCCAATAAAATAGGTGAATATGGGTATATATGTATGTTGGGCTTGTGGGTTTTTGTGGGTCGTTCACTAATTATTTAAGAAGATAGTTTGATTTTTTTGGCTGATTCTTGGGTTTGTGCTTTGTATATAAACCCGAACATGTTTAGGGTAAAA…
LOC108204750	AGGGGAGAGGGACCGTCGGATCGGAAGCAAGGGTTTTCATTAACACACACATAAAATATGTAATGGAGACCTTTCTAAAAATTCACTAAACCTCAACTTTTGTCGTCTTCTCCACCATTGCACTGCTGTCACTAGGTTTGTGTCTTCTCTTCGTAAGTACATTTTGTCTTTCTCTTCAACGTAATTTAGTTTGTCTGATGTTATGATGATGTTTTTGATAATCATGTGTTTGGTTATAATTTTGAACCCAATAAAATAGGTGAATATGGGTATATATGTATGTTGGGCTTGTGGGTTTTTGTGGGTCGTTCACTAATTATTTAAGAAGATAGTTTGATTTTTTTGGCTGATTCTTGGGTTTGTGCTTTGTATATAAACCCGAACATGTTTAGGGTGAGA…
LOC108204750	AGGGGAGAGGGACCGTCGGATCGGAAGCAAGGGTTTTCATTAACACACACATAAAATATGTAATGGAGACCTTTCTAAAAATTCACTAAACCTCAACTTTTGTCGTCTTCTCCACCATTGCACTGCTGTCACTAGGTTTGTGTCTTCTCTTCGTAAGTACATTTTGTCTTTCTCTTCAACGTAATTTAGTTTGTCTGATGTTATGATGATGTTTTTGATAATCATGTGTTTGGTTATAATTTTGAACCCAATAAAATAGGTGAGAAATTGAGCATTGGTGGTTGACATGGCTGAAGAGAAGAAAACGGGGCAATTTAAACTGGTTGATGCAGTGCGCAAGCCTCAATTACCTACAATAATTGAGCGTGAAGAGCTTATCTACCAGGCTTCAAGAGAAGA…
LOC108204750	AGGGGAGAGGGACCGTCGGATCGGAAGCAAGGGTTTTCATTAACACACACATAAAATATGTAATGGAGACCTTTCTAAAAATTCACTAAACCTCAACTTTTGTCGTCTTCTCCACCATTGCACTGCTGTCACTAGGTTTGTGTCTTCTCTTCGTGAGAAATTGAGCATTGGTGGTTGACATGGCTGAAGAGAAGAAAACGGGGCAATTTAAACTGGTTGATGCAGTGCGCAAGCCTCAATTACCTACAATAATTGAGCGTGAAGAGCTTATCTACCAGGCTTCAAGAGAAGATATACAATCAGATACAACCACATGCCAGAATCATTCAGGAGATTCTATACCAGCTGTTAATGAATGTAATGAAGATATAAATCAATTGGGTGGAAGCAGCGGTTCTA…
LOC108205128	ATTTGAATTCAGATCTCGAATTCTCGATACATAAATAGACCGATAGAGTAGTAATTCCTGGTATAGGAGTTGGGTCGACGACCCGAATCAAGAGCGTCCGCATCCGAAACGAACAACATCTCTCTCTCTCTCTCTCTCTCTAGGAACAGCCTACACAGGTAATTTATATATTAACACTTAATTATTTATTCATTCTTCTATTGTTTTTTAAATTAATAAATTAATGTTACCCACAAATTTGATTCATTTACCTCTCTGTGTTCCCCCCCAAATTATACACATCAATTAGGGTTTTGCTAAATATTCTAGGGCAAACTTCCCGCCTTTCTCTATTTTTAATTTTCTAGGGTTTACTGTGTGTGTTTAGTTAGTGTTGTAATGCGTCTGTATTGATTGGCT…
LOC108205128	AGAGCGTCCGCATCCGAAACGAACAACATCTCTCTCTCTCTCTCTCTCTCTAGGAACAGCCTACACAGGTGTATAATCATGTGACTGTGATTTAGATAAACTTGTGTCAACGAATTAAGTCAGATTTCACCCTGAGGTCGATTAATGCATGCCCAC
LOC108204595	TGATTGTGATAGAAGAAGCTTTATTAAGTGGGTGACACATTTTATTATTTCGAAAGGAAAAGTGATAAAGTAAAAGGTAAAAGGGTGAAAACAAAATGATAAAGAGTAGGTCCTGCTCCCGCATAAATTTCTTGTAGCTGAAGTAATTTAGTGTTCTTTCAAGTCTTCATGTTCCCAAAGCCAGAATCTGAGTCTTCACTCTTCAGTGTATCGTAATCAAACTAATTCTTCTTCTTTTTTGCTGCAAATTGCTTTCTGATTACATTTGAACTCCTCTAGTCCAAGATCTTGCTTGCATCAGAGAGATTATATTTACCCTCTCACAAAGATTGATCTTTTTCGAATCTTTAGCCATGGATGTCAATGAATCCCACAGTGTAAGTCTGAAACTCTTGGTAG…
LOC108204595	CAGAAAAGCCATGAATTTCAGAGCACTCAAGCTATTGACAAACAGTTCGAAGAACTGACTAAATTTAAAAAGATCATAAAGAATAGCCTTAGAGTTTTATTGAACTGAATTTTTCTGTGTGCATATCACCAAAGTTTATGATTGCAGGTTTAATTTGAAGATCTTGATCTTAAAGATGATTGTGATAGAAGAAGCTTTATTTAGTGGGTGACACATTTTATTATTCGAAAGGAAAAGTGATAAAGTAAAAGGTGAAAGGGTAAGACTAAATGATAAAGAATAGGTCCTGCATAATTTTCTTGTAGCTGAAGTAATTTAGTGTTCTTTAAAGTCTTCATGTTCCCAAAGCCAGAGTCTGAGTCTTCACTCTTCAGTGTATCATAATCAAACTAATTTTTT…
LOC108206272	AAGCACAGCCACTATTATATGGAGAGACAGATAGGGAAGTTAGAATATTGTTTTATGAAAATAGCAGCAGCCAAATCCAAGTGGAATGGGCAGTGTGTATAAAATGTATTTTCTGCTGCTTCTTATTGGAGTCCTGGCCTTTGTGTCAAACCAGGTGGTTGAAGACTCTCATTCAGCAGTTAAATTCCTCCCTGGTTTCAGAGGACCCCTTCCTTTTAATCTTCAGACTGGGTATGTGGGGGTAGATGAATCAGAGGATGTGCAGTTGTTCTATTATTTTGTTGAGTCGGAGAGAAATCCGATGGTGGATCCTCTTATTCTGTGGTTGACAGGAGGCCCTGGTTGTTCTGGCTTCACTGCTCTTGCTAATGGAATAGGTCCACTATATTTTAGGGAAGA…
LOC108208584	TTCCAAACAATCATACTCTGACACATGTCCATGTCCTCTCCAAGATTCACCCGTCTCTCTGCATGAACACAGACCAAACTCAACTACAATGCACACCCTCACAAATTCCTCCACCACCGCCGCCGTCTTATTCCACTCCTCACGCATCCCAACGCATCTCCGACCAACTCCCCATTCACTCAATATCTCCCCACACTCAATATCAACCATCCACTCAATCTCTCCCCACACTCTCTGTTGCTCCCAGCCCAAACCCACAAAAACCCAGACCCGGATCCGACCCATTTCATCATCCCCTGAGCAGAACCAACTCACTGATCCAACCCCTCAAGAACAATCCAAGCTAATACCCTTGATTTTCTCAATCTCAGTTGGGTTATTCTTAAGGTTCTTGATCCC…
LOC108209346	AGACACTCTTGAAGAGGCTTTTTCCAATATGTCACAATGGGTTTCTGGAGATACATCATCATCAGGCTATGAGGGCCTGGATCAATCATCTGAAGTATGGGTAGCTAATTGCTTGACTAATGCTGAGATTCAACTTAGCTCTAATGATTTGAATAGTTCTGGTGCGGCTGAAGTTCAAAATGCTGGTTTGTCTGACATCCATCGTGAACATGAGACTAGGAGAGCTCAGAAGTGTCGCCCTCGACCTCGTAAAAATGTTGTTCTCAAAGGTAAAAAGTCATACACACAGACTCCAGTTAAGGGGACATCTTCTGTCGCCTACCCATTTGGTTTTATTAAACCATGTGGTGTTCATGGAGATGTGACTCTGAGAGACATAAACCAGCGGATTTGCACTCC…
LOC108204536	GTTCTGTGGTTAGAAGTTCAGGTTCAAGGGTTGGTAATACTTTTTGAATTTGGACCACTAAGAAGATTACTTTTCAATATAGATATGAGTGTTTTTACTTAAACAAGCGAAAGATATCGGAAACGACAAAGAAGATGATGAAGGAAACAGAGAGAGACACAAGCAAACAAAGATAAAGTTGTTGATGTCCTGGCTACCATTGTTATGTAGAGCTACCAATGGCACAGATACCCCGTTGTTGAGCTTTAGTGAGAAAGGTGAGATAGAAAGAGTCTTGGAGGTGATCATAGAAGCTTTAAATAACGAAGAACAAGAAAAGATATTGTCTCTTTGGCTACATCATTATATCCACTGTCCCACCTCCGACTGGCCTAACCTCCAGGATTGCTATTCACGGTG…
LOC108201351	GATAATGTGTGACTGAGGCCAACGCTCAATTTCAAAAGACTATCGAACATGTCTATTATGAAATCAAAATTTTAATCTTGATATACAAATTTCCGGTGAAGGGTAGGTGGTTTTTACTTGTACGAAAGAAATTGGTAGGTGGTCTTTTTAATCACATTTGCAGAACACACGTGCTCATTCAAGAATCAACAACAGACTGCCCGTCTGCCATATCCATTCCCACTCTGCTGCTACACACACTCACACTTCTGTATCTATACTTGCACATTTTACACAGAGCTTGAGGCTCATTTTCACATAATCAATGGAGTCGGCGTTATCTATAGCTCCCGCAACGACGTTGCTAACCCTAACTAAGACGCTTCAACTGAGTCGCCGATTCTGCGCCACTCGTCCGAT…
LOC108201351	TGATAATGTGTGACTGAGGCCAACGCTCAATTTCAAAAGACTATCGAACATGTCTATTATGAAATCAAAATTTTAATCTTGATATACAAATTTCCGGTGAAGGGTAGGTGGTTTTTACTTGTACGAAAGAAATTGGTAGGTGGTCTTTTTAATCACATTTGCAGAACACACGTGCTCATTCAAGAATCAACAACAGACTGCCCGTCTGCCATATCCATTCCCACTCTGCTGCTACACACACTCACACTTCTGTATCTATACTTGCACATTTTACACAGAGCTTGAGGCTCATTTTCACATAATCAATGGAGTCGGCGTTATCTATAGCTCCCGCAACGACGTTGCTAACCCTAACTAAGACGCTTCAACTGAGTCGCCGATTCTGCGCCACTCGTCCGA…
LOC108201360	GTTAAGACAGTTGAGGGTTGTATCACGTGGACATCCGCACGTGCAGGTTGAATCTCACCATTGCATTTGCCTCGACAGATACATACACATACATACAACTGTCATCATCTCTACTAATCTAAACCTATAAATAAATGCGCACACAGTAGCAGCTCATATCTCACAAACATGTCTGACCACAGATCCGCCAAAGACAAGAACAAAGCCAAGGTTTCCGATTCACGCCGCTGGATTTATCAAGATGATGATGAAGCGGATCATCAAAACGACGCCGATTTCGATGAGTATGATGAGGATTTGCCTCCGCAACACGTGTTGGACTCGGATGAAGATGATAATGTTGATTATAAATTGATTCGAACCGAGCCGAAGATTGATTCCTTCGATGTCGAAGCTCTC…
LOC108205373	AGAACAAAAGAAACATCCATAATAGCGGAAGCACAGTGTTCGCGAAAGTTCTTTGAGAGGACATAATTCAATAAAGCCAGGGGATCATCATCATTCAAACCCTAGAAGAATTTACAGGACGATGTCGCACTTCGGACGAGCCGGACCACCAGATATCTCCGATACCTTTTCTCTCCTCATCCTCAACATCACTTTTCGCACATCGGCCGATGATTTGTTCCCGTTGTTTGATAAGTATGGCAAGGTTGTTGATATCTTTATCCCCAGAGATCGAAGGACTGGTGAATCACGTGGGTTTGCATTTGTACGGTACAAATATTCAGATGAAGCACAGGATGCTGTTGATAATCTAGATAGGAGAGTGGTTGATGGTAGAGAAATCACTGTGCAGTTTGCAAA…
LOC108205373	AGAACAAAAGAAACATCCATAATAGCGGAAGCACAGTGTTCGCGAAAGTTCTTTGAGAGGACATAATTCAATAAAGCCAGGGGATCATCATCATTCAAACCCTAGAAGAATTTACAGGACGATGTCGCACTTCGGACGAGCCGGACCACCAGATATCTCCGATACCTTTTCTCTCCTCATCCTCAACATCACTTTTCGCACATCGGCCGATGATTTGTTCCCGTTGTTTGATAAGTATGGCAAGGTTGTTGATATCTTTATCCCCAGAGATCGAAGGACTGGTGAATCACGTGGGTTTGCATTTGTACGGTACAAATATTCAGATGAAGCACAGGATGCTGTTGATAATCTAGATAGGAGAGTGGTTGATGGTAGAGAAATCACTGTGCAGTTTGCAAA…
LOC108207421	AATTAAATCATATGAAATTACAGTTTTGCCCCTTCCGTGGGCCATTTGATTCTGCCTTTAGTCTCCGTTAAACCTCTGTTATCTACGTATCTTACTCTCTCAAACTCCTTCACCTGATCACCTCCCCCTACTGCGTCTCTAGCTTTCTCTTTAATTATTCTGTTTCATCCTCGTGCGTTGAAGGCACTGGCGTCTGATCCGGATTTGAAGAAAGAAAGAGGCGCCGAATGAACAGTTACTGATTTTTTTGTGGTATTGATTCTTTGTGACAGGAATTGTGCGTTAGCTATGTATTGGTGGATCAGGGTCTGTCCGCATATGACGAAACACATGTTTTGGTCCTTCAGTATTGGATTGAGGCTGCAATCTTATTATTTCCTTTATGCTCTGCAAGCTTTT…
LOC108207421	AAGACATCTTCGAGGATATTTTGGAAACAAAAGCATTTGATAATTTATATAAAACCTCTGATTGGCTATATAACTTTTGGGTCTACTTAAATCATGTACTTACCTGTTCATTTTGATGGCCTGTCTCATGCTAGAGTAAAAAAGCATTCTCATCAACTTAATTATTGTCTGGTTATTACTGTGAAGATACAATGGATATGATTATCAGTGTTTTGTTTTCTTTTTGAAATTAGAGTGTTAGGCACATATTGATTATTGCTGAGGATTGCAGTTAATTATAAATATGCACTGTGTTTTCACATCTGTGAAGTTACCTGAGCAATAATGGTTATGTCAATTGTCAAGAAAGGATGCTCCGGAAGTCATGGCAGTACTATTGATGATCGAGAGTTGGAACTT…
LOC108207421	AAGACATCTTCGAGGATATTTTGGAAACAAAAGCATTTGATAATTTATATAAAACCTCTGATTGGCTATATAACTTTTGGGTCTACTTAAATCATGTACTTACCTGTTCATTTTGATGGCCTGTCTCATGCTAGAGTAAAAAAGCATTCTCATCAACTTAATTATTGTCTGGTTATTACTGTGAAGATACAATGGATATGATTATCAGTGTTTTGTTTTCTTTTTGAAATTAGAGTGTTAGGCACATATTGATTATTGCTGAGGATTGCAGTTAATTATAAATATGCACTGTGTTTTCACATCTGTGAAGTTACCTGAGCAATAATGGTTATGTCAATTGTCAAGAAAGGATGCTCCGGAAGTCATGGCAGTACTATTGATGATCGAGAGTTGGAACTT…
LOC108220118	TCAATTTATAACAACACATAACAAACTCAAATGGATTCTTTCCTTAGCAAACTCTCTATTCTATTTGTTCTTCTAGTCGCCACACCCTTAGCTCTAGCTCAGACTAGGGTCGGCTTCTATTCCACCTCTTGTCCCAGAGCGGAATCCATCGTTCAAGCCACCGTTAAGAAACATGTTAACTCCGATTCCACTGTTGCCCCCGGACTGCTCAGAATGGTCTTCCATGATTGCTTCGTTCATGGTTGCGATGCTTCGATTCTTATCGATGGCAGCAATGCTGAGAAAACCGCTAGGCCAAATCTTCTGCTGAGAGGATATGAAGTGATTGAGGATGCCAAAACACAGCTAGAGGCAGCATGCCCCGGAGTCGTGTCGTGTGCTGATATTCTTGCTCTTGCT…
LOC108204990	GTGAACTCGTACCAGAAAATGTGATATTAAAATTATGATTTTTGTCATTTTGGCCCAAGTATACGATGAAGCGGGTTAAAAGGGGGGCGTACTCTACACATTCGACACAAAGCTTCTTACCTTAAAAAGCTGTTTAAACAAAACAAAAGTATAACTCACTTTGATCTCACTCCTCTCAATTTCGCTCCCTTTTCTTTTTCCTTTTGCTTCATCAAAATAAACAAACCCCATTAATTTAGTCACTGCAAATCTTGTAAAACTGTAGTGGGGAGTTGAATTTGGGTGGCTCAAGATTCTCTTGGTTACAACCACTATTCTTGGTTCTATTGCATTCATGTCTACTGATATTCGATAAATTTTTCGCCTTTACAGCAAGCCCTTCTAGATTTATTGTTCTTG…
LOC108204814	ATTAGGTCAAAAACTAAAAACCCCGACACAATACACTATATAAACGAGCCAAACTAAACGCAACCTCTCTTATTCCAATTTTAGGGTTTATCTTTCGGCGACTTGAGTCTTTCCCAAAAAGCTTCGCTCTTTCTTCTTTCGCTTAATTCCTCTCTACTGTGCAGAAATGTCTGATGATGCTGAATATCGATGCTTCGTGGGTGGCCTCGCTTGGTCAACATCTGATAGAGAATTAAGAGAAGCATTTGATAAGTTTGGTGGTCTTATTGATGCAAAGGTAGTTGTTGACAGGGAATCTGGCCGCTCTCGTGGATTTGGATTTGTGACGTTTGATGACAGGCAATCAATGGAAGATGCTATTGAAAAAATGCGTGGAATAGATTTAGGTGGGAGAAATAT…
LOC108204814	ATTAGGTCAAAAACTAAAAACCCCGACACAATACACTATATAAACGAGCCAAACTAAACGCAACCTCTCTTATTCCAATTTTAGGGTTTATCTTTCGGCGACTTGAGTCTTTCCCAAAAAGCTTCGCTCTTTCTTCTTTCGCTTAATTCCTCTCTACTGTGCAGAAATGTCTGATGATGCTGAATATCGATGCTTCGTGGGTGGCCTCGCTTGGTCAACATCTGATAGAGAATTAAGAGAAGCATTTGATAAGTTTGGTGGTCTTATTGATGCAAAGGTAGTTGTTGACAGGGAATCTGGCCGCTCTCGTGGATTTGGATTTGTGACGTTTGATGACAGGCAATCAATGGAAGATGCTATTGAAAAAATGCGTGGAATAGATTTAGGTGGGAGAAATAT…
LOC108209329	ACACATTATTCCATATTCAAAGCAGCACGAATGTACCGTATGGAATTTGAAAAGGTCAACACCTTGACCTCAGGAGAGATTGATTGCAAAGATTTGAAAGCTAAACTTCTTTGTCACCAGGACAAACCAGCAATTATCAATGTCAATATTGGTGCCGTTGATGATCTTGATCTTGTTATAAAGACCCTTAAGGAAAGCGGTTTCAATGATGACCGGTTTTATATTCACTGTGATGGAGCACTTTTTGGCCTCATGATGCC
LOC108204443	AACATTTTCAACTCCTTTTCTTTAAAGTTTGCCTTGTAAGATAACCCCTTGTTTGGTTCTATCCCACCTGGCCTTTTAACAAACAACCCATTTGCCTATCTGTACTTGCCCTTTTTATCTGTTGCCAAACAGTGAGAAAGAAAAGTGGGCTTTGTGTTGAAGAAACATTCATTTTCTCTTTGCTTCCAAAACAGACAATGGCTGATGGTGAAGATATTCAACCTCTTGTCTGTGATAATGGAACTGGAATGGTTAAGGCTGGATTTGCTGGTGATGATGCTCCAAGGGCTGTGTTTCCCAGTATTGTTGGCAGACCTCGACACACTGGTGTGATGGTTGGAATGGGCCAAAAGGATGCCTATGTTGGTGATGAAGCACAATCCAAAAGGGGTATCCTCA…
LOC108204443	GACTAACATTTTCAACTCCTTTTCTTTAAAGTTTGCCTTGTAAGATAACCCCTTGTTTGGTTCTATCCCACCTGGCCTTTTAACAAACAACCCATTTGCCTATCTGTACTTGCCCTTTTTATCTGTTGCCAAACAGTGAGAAAGAAAAGTGGGCTTTGTGTTGAAGAAACATTCATTTTCTCTTTGCTTCCAAAACAGGTTATAGACAATGGCTGATGGTGAAGATATTCAACCTCTTGTCTGTGATAATGGAACTGGAATGGTTAAGGCTGGATTTGCTGGTGATGATGCTCCAAGGGCTGTGTTTCCCAGTATTGTTGGCAGACCTCGACACACTGGTGTGATGGTTGGAATGGGCCAAAAGGATGCCTATGTTGGTGATGAAGCACAATCCAAAAG…
LOC108209127	TCTCTCCAATCTAATGGGACTGAGTAAGTACTCCATAAAACAAAATTTTACTATGTATCTGGTACTAAGTTACTAATACCGTAATAGTATCAATTTTTTAACCTTCATACTTAGAAATTGTGCCCCAAAGTGTGTCCGAGACGTATAAATAGGAACCAGAACTGTACGACATGCATTCTCTTACCATAACATGATTAACTTGAGACCATCGTCTCTTCGACTAGCTTCATCACTTCTTCACTCTCTTCCAAACCCTAACCCATTACACTCACATCATCTAGACACACGACAACTTCGCTCTACTTGCTCGGACTCCCAAAAACACGCGCATGCTCTCAACCTGTTTGATCAAATGCTCCAGACACAACCCCTTCCTTCTATCAAAGACTTCACTAAATT…
LOC108209127	TCTCTCCAATCTAATGGGACTGAGTAAGTACTCCATAAAACAAAATTTTACTATGTATCTGGTACTAAGTTACTAATACCGTAATAGTATCAATTTTTTAACCTTCATACTTAGAAATTGTGCCCCAAAGTGTGTCCGAGACGTATAAATAGGAACCAGAACTGTACGACATGCATTCTCTTACCATAACATGATTAACTTGAGACCATCGTCTCTTCGACTAGCTTCATCACTTCTTCACTCTCTTCCAAACCCTAACCCATTACACTCACATCATCTAGACACACGACAACTTCGCTCTACTTGCTCGGACTCCCAAAAACACGCGCATGCTCTCAACCTGTTTGATCAAATGCTCCAGACACAACCCCTTCCTTCTATCAAAGACTTCACTAAATT…
LOC108209127	TCTCTCCAATCTAATGGGACTGAGTAAGTACTCCATAAAACAAAATTTTACTATGTATCTGGTACTAAGTTACTAATACCGTAATAGTATCAATTTTTTAACCTTCATACTTAGAAATTGTGCCCCAAAGTGTGTCCGAGACGTATAAATAGGAACCAGAACTGTACGACATGCATTCTCTTACCATAACATGATTAACTTGAGACCATCGTCTCTTCGACTAGCTTCATCACTTCTTCACTCTCTTCCAAACCCTAACCCATTACACTCACATCATCTAGACACACGACAACTTCGCTCTACTTGCTCGGACTCCCAAAAACACGCGCATGCTCTCAACCTGTTTGATCAAATGCTCCAGACACAACCCCTTCCTTCTATCAAAGACTTCACTAAATT…
LOC108209127	TCTCTCCAATCTAATGGGACTGAGTAAGTACTCCATAAAACAAAATTTTACTATGTATCTGGTACTAAGTTACTAATACCGTAATAGTATCAATTTTTTAACCTTCATACTTAGAAATTGTGCCCCAAAGTGTGTCCGAGACGTATAAATAGGAACCAGAACTGTACGACATGCATTCTCTTACCATAACATGATTAACTTGAGACCATCGTCTCTTCGACTAGCTTCATCACTTCTTCACTCTCTTCCAAACCCTAACCCATTACACTCACATCATCTAGACACACGACAACTTCGCTCTACTTGCTCGGACTCCCAAAAACACGCGCATGCTCTCAACCTGTTTGATCAAATGCTCCAGACACAACCCCTTCCTTCTATCAAAGACTTCACTAAATT…
LOC108209127	TCTCTCCAATCTAATGGGACTGAGTAAGTACTCCATAAAACAAAATTTTACTATGTATCTGGTACTAAGTTACTAATACCGTAATAGTATCAATTTTTTAACCTTCATACTTAGAAATTGTGCCCCAAAGTGTGTCCGAGACGTATAAATAGGAACCAGAACTGTACGACATGCATTCTCTTACCATAACATGATTAACTTGAGACCATCGTCTCTTCGACTAGCTTCATCACTTCTTCACTCTCTTCCAAACCCTAACCCATTACACTCACATCATCTAGACACACGACAACTTCGCTCTACTTGCTCGGACTCCCAAAAACACGCGCATGCTCTCAACCTGTTTGATCAAATGCTCCAGACACAACCCCTTCCTTCTATCAAAGACTTCACTAAATT…
LOC108227950	CGCGTGGTTACTTCCCACGAGAAGCAGTGTATTCAAAACCGAAACCGCCACACAGTTTCCTCCTCCCCAAACCAAAAGAACCCAACTGCTACTCATTTGCGAAGATGGAAGAATCGGACAAGAAGAAAATATTCAGCGTGCGCATCGTCTCAATCGACTACTACATGTCTCCTCCCATCACCGATATGGATATCTCTTACAGCTCTTTCCAAGGTGGGAGAGTAAAGGAAGTGCCTGTTATAAGAATATATGGCTCCACTCCTGCTGCTCAGAAAACATGTCTGCATATTCACCAGGCTTTACCTTATTTATATGTTCCATGTTCTGAATTGTCCCTTCGACCAGAGCTTGAAGAAAATTAGTTGAATACTCGAGTAGCATATTTTCTTGGGTGCCTGC…
LOC108227950	CGCGTGGTTACTTCCCACGAGAAGCAGTGTATTCAAAACCGAAACCGCCACACAGTTTCCTCCTCCCCAAACCAAAAGAACCCAACTGCTACTCATTTGCGAAGATGGAAGAATCGGACAAGAAGAAAATATTCAGCGTGCGCATCGTCTCAATCGACTACTACATGTCTCCTCCCATCACCGATATGGATATCTCTTACAGCTCTTTCCAAGGTGGGAGAGTAAAGGAAGTGCCTGTTATAAGAATATATGGCTCCACTCCTGCTGCTCAGAAAACATGTCTGCATATTCACCAGGCTTTACCTTATTTATATGTTCCATGTTCTGAATTGTCCCTTCGACCAGAGCTTGAAGGTGGTCTTTTTGCTTTAAATTAGTTTCTTATGGCTTTATTCTATT…
LOC108228049	AGGAAATAAATTGCGGGAGATACGTGAAACTCTACATCTGTAGCCGGATGTCTGTAATTATAGAAGCTTGCAATTGTAGTTGCTGTGACATGATTATATTTTCAAGGATTCGTCCAGGCAAATATAAAGTCGAAAAATAGTTTTAACAGCTTGAATTTATATGTCTGGCCAAACAGTAGTACAGTACAGTTAACTGAGCCACCTGATCAATTCCCACCAAGAAAACTGTAGGAAGCAAATCATATTATGCAGAGGAACACAACGTTGCGTCGAAGAATGATCGGAGATTATTTCTGTGATGATGAAGTTGCTGATGGAAAGGGCACTTACTTGCAACGTAACAATGGCAACATGGTCCTTGTCTTCCCATGGATGATAAAGTTGCTGATGGAAAGGGCA…
LOC108227999	CTGTTTTTTTTAAACACCCGAGAGCAGTGCTCCCAGTGGTGAGCTGGTGGTAGTTGGCGGAACAATGGAACTGAGGAATAAGCCTAACGCTGTCTTCATGGCCTTCGGCACCAAAGGCGACGTTTTTCCTCTTGCTGCTCTTGCGGTGGCTTTTGCTCTTGATCAGGAGCAATACCATGTAACCTTCATAACTCATTCAGCGCATGAGAGCTTAACCCAGAATTTGCTGCAAAAAGGTGTTGCTTGTATTGCAGTCTCATCACCACCTACACTTTCTCCTGTTAATGAAAATGACACTGAAGATATTGCAAACTCTTTTTCCTTGGAGAAAAGCAAAATTACAAGAGAACATAGGCAAGAGTGTCTTTCCATATTTGGAAGGATATTTGCAGATGGCTT…
LOC108204476	GTAGCAATGTCATTATTGGAACACAGTGAACATGTTGCCACTTTATCTATCTTTCCTCCATTCCAAATATATCAGGACACAACTGCTTCATCAACTAGCAGTCTAGCAACCATCTCTCTGTTTCTCCTGCTTCTCTCTGTAATCTTCAAACACCCTTTTATCATTCATGTTTATGTTCAGCCACAGTGGTTTCTCACATGATACTGTAAGATTTTTCTTTGCCATTTTGTTGTTGTTGTTGTTACATTTTATGTCACTCATCTTGGTAGCTAGCCAGTGTTTTTTTCGAGTTTTCGATGAGTTTGGTACTTGATTCTTAGGTTTATCTTGAAATTTCAAGATTACTAGTAGTTGATTTCAGTAGAATTGCAATATTATGTTTGATAATGACGAGCTTGA…
LOC108205105	TGATGATTTTTGTGTATGTATATATGTGTGTATAGTTAGGATTGTGATTTCTTCAATTTTTGTTTTGTGGAATATAAGATATGTTTTATGGTGATTTTCAGGATTGTTTATGTGTGGGTGTGTGTGTTTTGGATTTTGGGGTTTGTGAGGTGTCTTATGTGATTGATCAAGCCTTAGGTTATAATTTTGGTTGTTTCGATATGGAGGTGATCCATCTCAGGCACTGAGGTGGATGAGGAAGGTTCATTTGTGTCTTACCTTTTAATCAGGAAGATTAAACGCTTTTTTCATAAAATAAATATAGGGAGCAGACACCATATATGGATAGATTTTCTGGAAAAAGGACTGTTGGTGGACTTTGTGTACCTAAGAAAACTTCCAGCCTGGTTTTGGCGGATG…
LOC108205105	AAGCCAATATTTTATTGGCAGGACGGCTTTGTAGCCCCTTTATAGAATTCCTAAAACAAAACACTTCACCACTACCTTCTCTCTCTCATCTCTCCCTGTCTCCCTCAAATTTGATCAACAAAACACACAAACAAAAACTAAAGACAAAATTTCATGCCCCTTCCCTCAAAAGCTTCCATTGTTTCATAAATATAGGGAGCAGACACCATATATGGATAGATTTTCTGGAAAAAGGACTGTTGGTGGACTTTGTGTACCTAAGAAAACTTCCAGCCTGGTTTTGGCGGATGCAGCTGACAACAAGGATAGAGAAGCTCAATTCTGCAATAGACTTGGATGCAGTGGCAGGCTTAATTACACCAAAGCTGCCCAAATTGGAAGCACTAGTAAGTCTAAATC…
LOC108205105	AAGCCAATATTTTATTGGCAGGACGGCTTTGTAGCCCCTTTATAGAATTCCTAAAACAAAACACTTCACCACTACCTTCTCTCTCTCATCTCTCCCTGTCTCCCTCAAATTTGATCAACAAAACACACAAACAAAAACTAAAGACAAAATTTCATGCCCCTTCCCTCAAAAGCTTCCATTGTTTCATATTGTAGGTTATAATTTTGGTTGTTTCGATATGGAGGTGATCCATCTCAGGCACTGAGGTGGATGAGGAAGGTTCATTTGTGTCTTACCTTTTAATCAGGAAGATTAAACGCTTTTTTCATAAAATAAATATAGGGAGCAGACACCATATATGGATAGATTTTCTGGAAAAAGGACTGTTGGTGGACTTTGTGTACCTAAGAAAACTTCCAG…
LOC108204407	TTTTAAAACAATTCCAAGCAAGAACATGCCACATAAACAATATAATAAAAGAAACCAAAAAACGAACTGGCAAGTAGCAAGTAACTAGCTTTGAAGGTTGTTATGTTAACAAAGAATATAAGAGAAGAGCATAAAACGAGAAGTCGAGATTTTGCTTAATGACTTTAATATTATGCAATATCAGTCAGATCTCTCGAAAACCAAAAAGTCTACTTACATCTTCAGAACCAGATTCATCTCTAGCTTTCTACAGTTCTATTGCTGCACCTGCTGAAAGTCATTCATCTGCTCTCCTTCTGAGAACCTCTGGCTTTCGCCATGTACTGGATTATTATGACCAGAGTTCGGAAACTTTTCTTGAACAGGGACATCTCCACCAATACCTTGCCCATAGCTACC…
LOC108205448	TTTAAAACCGACGAATATGAATAGCGTAAACCAACAGAAACAAGGAAACAAAAGAGAGCACCGCATATTCTTCTTCATCTTCTTCGATCTCTTAATACTCGTTTTCTGTATATGGAAGAACGCCAATCCGAAGACGAAGAAGAAGACGACGTCGTTCTCATCCATCTCCTCCCTCTAATCTCCTAATCACACACACACATCCAATTCCAATTATATAATTCCTTTCATTTATTCCGATTGTGTCCTTTAGGGCAAGTGTGAATTGGGAGAGTATCGGAACCTCCGGGGATGAAGAAAGGGGGAGGTTTATCGTCGATTCGACGGATGATTATCCGTCGGAAGGCGAAGAAACCTGCCGCCGGGATTGCGGAGTCCAGCGGCGCTGTGCAGTCGCCGACG…
LOC108206653	GGGGATATAAAAAGGGCATGAAAACATCTCTTTCTGGGTTGGAGACTTGGAGAGAGGGAGGGAGAGAGCAGGAGAAGAAACCCAGCCCTAGGAGATAGAAAAGAAGTCTTTGAATTCAAAGATCTAAGCTTTATAACATTCTCATATAAGTATACTAAGAATCCTCTGTGTTGGGGGAATGGCAAACTCGAAAGGGCCATCGAGCTTCAGAAGTATGATGCACAATGGCAAGCATTCTTTACTTCCCCCTAAAAGCCCATTCCCTAGTATTCCCCCAGTATATGTTGATCATTTCCCTTGTCCTGCCACTGGAGCTAAACGTATGACAAAGCCTAGAGATGTGAGCTCAAACCACCAGCGCACTTCTTCTGAAAGCGTTCTGATAGAGGATCAACCTTC…
LOC108204502	TTTTCTTTTAAGGTTTTTATTGGTTAAAAAATAGTGTCAGAAATTACATTACACTGCATAAACCATCGTTGCACTATTTTCCGGCAGAGGAAGCTGATCGGAGAATCCGTACAACCCCGCCGCCAGTTCGCCGGCCGTTAATTATTTCCGGTAGGTTTTATGTTCCGTTACTGGTCATGGACAGTAATTGTTCTGAGTTATCTGAAATTGCACGGATGCTTCCTCCTGACCCTGGAACTTTCGTTGATCGCGAAGAGTTAATTCATTATGTCGGGAAAATTGGTGTGTCGCAAGGATACGTAGTTACAATTAAGCAATCTAAGAAGGACAAGGTTGTAATGCTTGGCTGCGACAGAGGTGGTGTTCATCGCAGTAGACGTAAACATGATGGCGAGACCT…
LOC108204502	TTTTCTTTTAAGGTTTTTATTGGTTAAAAAATAGTGTCAGAAATTACATTACACTGCATAAACCATCGTTGCACTATTTTCCGGCAGAGGAAGCTGATCGGAGAATCCGTACAACCCCGCCGCCAGTTCGCCGGCCGTTAATTATTTCCGGTAGGTTTTATGTTCCGTTACTGGTCATGGACAGTAATTGTTCTGAGTTATCTGAAATTGCACGGATGCTTCCTCCTGACCCTGGAACTTTCGTTGATCGCGAAGAGTTAATTCATTATGTCGGGAAAATTGGTGTGTCGCAAGGATACGTAGTTACAATTAAGCAATCTAAGAAGGACAAGGTTGTAATGCTTGGCTGCGACAGAGGTGGTGTTCATCGCAGTAGACGTAAACATGATGGCGAGACCT…
LOC108205625	ACCGGGAGGTGTCCGTTAATTAAAAGCCCGTAACGGACACTAACCGGTCTCTAACAGAATTTACATTGTTTCTGAAGAATCTTAACAAAACGAACAAAGTGGATACATATTTTGTGTGCATTAAATCTAGGGTTTATGTGAAACAATCATATTGATTTAGTTGTATGATCATATGTCTTCTGCTGAAGGAGAGAGCTCGCAGTCGCAGCAGCCGACGAATGGACCCAGAGTTCGAACTAGACCCGACCCGTTTCTCATTACCTGTCGTTGCTTCAGCTTTATTACTTGTCTTGCTTCAATTCTTTGCATCATTGTCAATGTTCTCTCCGCTGTTCGATCTTTTAAGAACAATTCCGATGTATTGGAATATTGGGTTGGCAGGGGTATGCTGCAGATCTT…
LOC108220218	TCAAAAATGCAGGTCAAATATAGTGTGCAGCTTGTTCGTTATTTTGATCTCGTTTCCCGAATACATTCTCGTATGTCATGTTAAATCTGATCCGATTGATTTCCGTTTTTCAAAATTAATAGCAACTCTTCGTTTTAGCTACACTAAACACCATCAGCTTAGCAACTAAACTCACTTAGCTACTCCCCCGCTTCATCTCTCCACATTCTTAGAGAGAGAAACAAAACAACACAAACTCACCATGCACCCCTACGATCTCAACCCTGGGTCGGACTCTCTCCGGTGGCTCCAAATGGCGGAGAAGCTGCTCACGACCCGCGATTTAATCGGAAGCAAGTCATTCGCCGCCAAAGCCCTAGAATCCGACCCGAACTCCGAGGCCGCGGAGCAGATCTTGGC…
LOC108220228	ATGTATGGATTCCAGCTAAGAAGAGTGGAATCTGTAAATGTGTTGCCACACCTTCTGCTGAAAAGACTGGTTATTTGTGATAAGTTCTTGAATTTGTGTGTTAGTTGTGGTATTAGTGTTCTTATGCGGGTGAAGTTGCAATGCGACTGTAAGTGGTTATCGATGTTCTTAATTAGTTTAGCACTGATGGTTGATTTCATTGGGGGAACCAATTTAAATATATAATTATTTGAAGAAAATACAATGACCTTAAGAAAAAGGTACCAGATGGCAGTCTAGACTTGTTCTCTGCGATTTTTGTTATATTAAAGAGATCTGTCACACCTTCATTTTAGACTTCGATACTTAGTCTAATATCGATTTTGAGAGAATATTACAGAAA
LOC108220228	CAATGATCAGTGATGTAGTCCTCATTTACTTGATAGCATCCTTTCATATTTAGCGTATGGTATAGCTAATTATAACTTATTGTTTTCCCCTGGATAATTAGACAGCACGAAGGAAGGCAGCTCAGTTATAAAGAACCCTGATGCCCAATAAGCCTTGGAATCGGTGACACAACTGAGCCTATTCCAGAAGTGATCACCTCTGATATGGCTAAGAAAGCTTATGCGCGCTTTCAACACTTGAGGTTTACAGTGGGTATGGAGCGGAACAAGGTGAAAAACCACTGAGAGCGGCAATATGTTCGGCTTATTATGCCACCCTTGGTATAGAGCAAGATGATGTATTTGCATCTGATGGGGCAAAGCGTGACATATCTCACCTTCAGGTTGTTTTTGGGTCTA…
LOC108196238	GCTGCCAAACTTTTATCGTGCAAGTCAGCAACTAAGCTAGGTTTTCTGAACTAGCTCACTGACACTCTACAACCTCATTTCAATCTGAAAATGTCTGTAATTCCAAATACCCATGTGCCCATTTCTGTTCAATCATCAACCTCTGCTTTCTTAGGCCAACCCAACAAATTATCTACTGCATTCAGAGCTAGAAATGTATGGATTCCAGCTAAGAAGAGTGGAATTTGTAAATGTGTTGCCACACCTTCTGTCGAAAAGACTGCTTACACAACTAAGGTTGCTCGTAATACCAATATTGGTAAACTTCAAGCAGGCTATCTTTTTCCAGAGATAGCACGAAGGAAGGCAGCTCATTTATTGAAGTACCCTGATGCACAAGTAATAAGCCTTGGGATCGGT…
LOC108196238	GCTGCCAAACTTTTATCGTGCAAGTCAGCAACTAAGCTAGGTTTTCTGAACTAGCTCACTGACACTCTACAACCTCATTTCAATCTGAAAATGTCTGTAATTCCAAATACCCATGTGCCCATTTCTGTTCAATCATCAACCTCTGCTTTCTTAGGCCAACCCAACAAATTATCTACTGCATTCAGAGCTAGAAATGTATGGATTCCAGCTAAGAAGAGTGGAATTTGTAAATGTGTTGCCACACCTTCTGTCGAAAAGACTGCTTACACAACTAAGGTTGCTCGTAATACCAATATTGGTAAACTTCAAGCAGGCTATCTTTTTCCAGAGATAGCACGAAGGAAGGCAGCTCATTTATTGAAGTACCCTGATGCACAAGTAATAAGCCTTGGGATCGGT…
LOC108209412	CAAAAATACATTGAGGTACAGTTGTGCACGCATGGCCCTTTCCAGACCGTGCTAGGCTGCTACATCAGTAAATCAGAGACATGGAGAACCAGGTTTCATCATTGCCCATCAGATCATAAAAAGGGCCTTGAAAATCCCTGGAGCAAATGTTCATTGGTATGACAAACCAGAAATGCGAAAGCAACGGAAGATGGGCCATATCACAATTGTTGGCCCCTCATTAGGCATTGTTGTATCTCAGTTGATGTCAATGCTAACGCAGGAAAGTACTGATAATCAGCCTGCAGCTGCTCCACGTGTTGGGATCATAATGGGCTCTGATTCAGATCTTCCTGTAATGAAGGAAGCAGCAAAGATTTTGAACGAGTTTAATGTGCCTGTTGAGGTGAGAATAGTTTC…
LOC108197074	ATTAATTAGTTTTGGCTCTCTACATTAGAGCTCTGAAAACTTTAATCATATACACATATACATTTCTAAAATGTTGATCATGTCGATATAAAAATTGTGTGGACAGCCATAAAAGAGTTTCTGCTCAGGTTGCTTTGAGATGAGTAACAGTATACAAGTAGTTGCCGGGGTGTAATTACATTAAATAAAGGAGATGGTATTCTGCCTCGCTGCCAATCATCTTCAACGATTTTGGTTACAGAATTATGTCTCATTCCCATTTTAAATGTTCTTATTTAGAAGAGTGTGAAATGATTTTGCTCAGGATTTTTTCCCCAAGGAGATCTTGCGCGGGGGACGACAATGCTATGGTTGCTCGTGCCAAGCTTCTTCTTGAGATCAGGAGTTTGTGCAGTTCCA…
LOC108197074	ATTAATTAGTTTTGGCTCTCTACATTAGAGCTCTGAAAACTTTAATCATATACACATATACATTTCTAAAATGTTGATCATGTCGATATAAAAATTGTGTGGACAGCCATAAAAGAGTTTCTGCTCAGGTTGCTTTGAGATGAGTAACAGTATACAAGTAGTTGCCGGGGTGTAATTACATTAAATAAAGGAGATGGTATTCTGCCTCGCTGCCAATCATCTTCAACGATTTTGGTTACAGAATTATGTCTCATTCCCATTTTAAATGTTCTTATTTAGAAGAGTGTGAAATGATTTTGCTCAGGATTTTTTCCCCAAGGAGATCTTGCGCGGGGGACGACAATGCTATGGTTGCTCGTGCCAAGCTTCTTCTTGAGGAGTTTGTGCAGTTCCATCCAA…
LOC108205116	AAACCCATTTATAAAACTCATCTAAAATAGTGGAGCAAAATTCGAAAGTGACATTTATAGCAAGAGACATGGTAGATGAAATACTACTATTTTACTAGTAGTGTTAAGCAAGTGCCAAAATATTATTGTCTCTATAATCTTGTTTCTGGATCCACGGCTGTCAAACCCAACCCACCATAACTCATTTGTTTCCACAAAAAGTCATAACCATTTCACTGATTCCAAGAAACTCACATTCTTTTGTCTAAATATATAAAGATTTCACATTTTTAGCACAAGCCCTTCGGTTGATTCAGCTTCTCCAGGTTTCTCTTCCTGGTAAATTGTTGGGCGAAATAATATCTCGAACATGTACAGACATTCACCCAGCAGGCACCAGAAAGCCAAAGGTTTCAGGTT…
LOC108202696	AATAAAAATCATCTCTTTGTCCTCCACTTTCCCTCTGTGCTTATTTTAATATATCTCCATGTGTATTATTGAGTGTGCTTACTATTTTAAGGTTTTTGTGGGGCACTTCAAATTTTGGCCCTTGAGAGCATCAACAAGTTCTTGAACTTGAGGAAGCAAGCAATTTGTGTAATGGGGATTTGAGGGTGAGCTTTCCCATTATGGTATCAGGGCCCACCTGGGGTTTCCATATTTAAGTGCTTCTTCAAGCTGTTGCTATCATCTTCAGTTCTTCACCTCCATCTTCACTTCTCAGCAAAGCAGGGGCCCTACAATCATATAAGCTAGCAAGCAAAGCAGTTAATCGGTTGCAGGCTTTACCTGGTGGGAGCATGGAAAGACTCTGCGATACGATGGTGC…
LOC108202696	AATAAAAATCATCTCTTTGTCCTCCACTTTCCCTCTGTGCTTATTTTAATATATCTCCATGTGTATTATTGAGTGTGCTTACTATTTTAAGGTTTTTGTGGGGCACTTCAAATTTTGGCCCTTGAGAGCATCAACAAGTTCTTGAACTTGAGGAAGCAAGCAATTTGTGTAATGGGGATTTGAGGGTGAGCTTTCCCATTATGGTATCAGGGCCCACCTGGGGTTTCCATATTTAAGTGCTTCTTCAAGCTGTTGCTATCATCTTCAGTTCTTCACCTCCATCTTCACTTCTCAGCAAAGGGGCCCTACAATCATATAAGCTAGCAAGCAAAGCAGTTAATCGGTTGCAGGCTTTACCTGGTGGGAGCATGGAAAGACTCTGCGATACGATGGTGCAGG…
LOC108204766	ATTATTATTATTTTATCTTTATCTCCTTTGCTTATTTATATCACTCCTCCTCACTTCGAGTTCTTACACATACGTACAACCTCATAAACTACTCCTCGTGAACACTCCAAGAATCCGTAGAACATGGGGAATAAGTATCTTTGGACAATTCTCTGTTTATGGGCTTTCACATGCACTCTTATTAATGCTTCCTCTGATGGTTTATTGAGAGTTGGTTTGAAAAAACGGCAGTTGGATCGCGACAGCATTAAAGCTGCCAGAAGTAGTAAACTAGATAGTAAATATGTGAAGACTGGTTTGGGTGATTCGGACATCGATACTGTATCTCTAACAAACTATTTGGATGCCCAATATTATGGAGAAATTGGTATTGGCTCACCTCTCCAGAAATTCACTGTC…
LOC108204925	TTTAAGAGCTTGGATAAAGAGTTTATTGGAGATGCTCTTAAGAAGAGCCACTCCGGTGATTTTAGTACTCAACTTCTTGTCTTGACGTATTGGATAAAATTATACGTTCTTTCCCCATCTCTCTCACACATTCGAAATAAAATAGTGCAAGTGCAGTATTTGCATACGCAATAAACACCACTAGAAACAACTCATGTATGCATCTCCGGCCAGCATATCACATCTCACCACTTGTGAATTCTGATCCTCTCTTCAAACACCACCTCAACCCCATCTCATAACAATCAAAACGGGCAATGATTCACCATCAAAGCCACCATCTTCAGCTCTGATGAGTCCCTCTGAGCTTGAGTCTGAGTTCTCCCACCATGATCCATCAGTCGCCCGGATCAACAACGG…
LOC108197744	TTTCATCAATAATTTCCTTCCTAATTCCTATTGAATCACGACACCACAAGAGGTGAGAAACCACCGTGACCATGGCAAAACAGGCGGAGTCCCCGCTGACCGGCGAGTTGACTCCGGCGAACTCCACCATCTGCGGGCAATGCAAATCAGAGTCAAGCCCCTTCCTCCACTACATAAAGCACCGCGGCCTCTTCCGCCGCCTCTGCACCACCTGTGTTCTCCGCTTCAACTCCCAGTCCTTCTGCCCCTCTTGCTTCTCTCTCTACAACCCCACCACCCCTCTCCAAGATTCCACCACCCCTTGTTCTAAATGCTACTCCATCTCTCATTCTTCGTGTATAGAAGGGTTGTCAAGCGGGTCCCAGGTAAATAACAACCCTAACAAACTCAATAACAAAC…
LOC108204605	AAGTATAAACGACTTCATTTTTCTTTCTAAAGAACGAGGAAAAGGGCAAGTGATCCTCCTGCATCTCTCTCTCTCAATCTCTCTCGATCTCTCCTTGGGTACAAGGTTTGAATTCTACTACTGGCTGACAGATTTAAGGAAAAATGGGGTTGTCTTTCACCAAGCTGTTCAGTCGGTTGTTTGCAAAAAAGGAGATGCGTATACTTATGGTCGGTCTCGATGCTGCGGGTAAGACCACCATATTGTACAAGCTCAAATTGGGAGAGATTGTTACTACCATTCCAACAATTGGGTTCAATGTGGAGACTGTGGAATACAAGAACATCAGCTTCACTGTCTGGGACGTTGGTGGTCAGGACAAGATTCGGCCCCTGTGGCGTCACTATTTCCAAAATACCC…
LOC108205301	GATAAAACGTTTATTTTTAAATAATTTTTTATACATAATAATTTGCCCTCATAATATTGTTTATTTTTAATACAAGTATACTTTAACTGCACAATCACGACAGATTGAACAAAAAATTGAGGGAAATTTGAAATCAGGAATGAGTTACAGACGACTAGTGCCCAACTCTGGACAACACAAAATCCCTGTAAATGTTTTAGACAGCATTCAAGAAATCAAAAACCTAACAAACCCATCATTTAAAACTCAAACCCCATCATTCTTAGCCACTAATCTCCTCAAATCATATTTTGGAAGGGGCTTAATTGAGGAAGCACGCACACTGTTCGATGAAATGTCTGAGAGAGACGTTGTTGCCTGGACTGCCATGATTTCTGGTTATGCTTCTTGCAATTACTA…
LOC108205301	GATAAAACGTTTATTTTTAAATAATTTTTTATACATAATAATTTGCCCTCATAATATTGTTTATTTTTAATACAAGTATACTTTAACTGCACAATCACGACAGATTGAACAAAAAATTGAGGGAAATTTGAAATCAGGAATGAGTTACAGACGACTAGTGCCCAACTCTGGACAACACAAAATCCCTGTAAATGTTTTAGACAGCATTCAAGAAATCAAAAACCTAACAAACCCATCATTTAAAACTCAAACCCCATCATTCTTAGCCACTAATCTCCTCAAATCATATTTTGGAAGGGGCTTAATTGAGGAAGCACGCACACTGTTCGATGAAATGTCTGAGAGAGACGTTGTTGCCTGGACTGCCATGATTTCTGGTTATGCTTCTTGCAATTACTA…
LOC108205301	GATAAAACGTTTATTTTTAAATAATTTTTTATACATAATAATTTGCCCTCATAATATTGTTTATTTTTAATACAAGTATACTTTAACTGCACAATCACGACAGATTGAACAAAAAATTGAGGGAAATTTGAAATCAGGAATGAGTTACAGACGACTAGTGCCCAACTCTGGACAACACAAAATCCCTGTAAATGTTTTAGACAGCATTCAAGAAATCAAAAACCTAACAAACCCATCATTTAAAACTCAAACCCCATCATTCTTAGCCACTAATCTCCTCAAATCATATTTTGGAAGGGGCTTAATTGAGGAAGCACGCACACTGTTCGATGAAATGTCTGAGAGAGACGTTGTTGCCTGGACTGCCATGATTTCTGGTTATGCTTCTTGCAATTACTA…
LOC108205301	GATAAAACGTTTATTTTTAAATAATTTTTTATACATAATAATTTGCCCTCATAATATTGTTTATTTTTAATACAAGTATACTTTAACTGCACAATCACGACAGATTGAACAAAAAATTGAGGGAAATTTGAAATCAGGAATGAGTTACAGACGACTAGTGCCCAACTCTGGACAACACAAAATCCCTGTAAATGTTTTAGACAGCATTCAAGAAATCAAAAACCTAACAAACCCATCATTTAAAACTCAAACCCCATCATTCTTAGCCACTAATCTCCTCAAATCATATTTTGGAAGGGGCTTAATTGAGGAAGCACGCACACTGTTCGATGAAATGTCTGAGAGAGACGTTGTTGCCTGGACTGCCATGATTTCTGGTTATGCTTCTTGCAATTACTA…
LOC108204573	TATGCGGTCAACTCACATAAAGTTACTTTAAGTGTACAAATCAAAAGTTTAATATAAAAAAAAACAGATTTTTTCTTTTTAGGAATAAATCCGATTCGGCAACGAACACGATTTCTGTGAGTATACTACCGGTTAAAAATCGCCGTGTTGTTTGTCTCACTGTTGAATCACCTCCTTGACCGGAAACTGCTCGGTAACCCTAAGCGTACCGATTATTTATCACTCGATCTATCTCAGACTTTCGGAGAATGGGGCTACGGCGAGGTATAGTACAATGCTCGCACGATTTCTCCAAGTTGGATGCTATTATAAAGAATTATGATAAATTTGACATCGGCACCAAGAATGCTATCCTCCAAGCTTCTCCCAGTGTTGTCTCTCTTATAAGTCGAACCGGTG…
LOC108203855	TTTGTGAGGGGTAAGAAAAAGAAAAGAGAGATTTCTATTTTACCCAACCCAACTGGAGCGATCTTGGATATGCATACACACTACGCGATTTAACTCACTGCTCACTCTCGGATCTCGTTTTTACACCCCTCTCTCTCTCTCTCATTTCTTCTTGGTGGCGGAAATGGCGTTAATGGCGGTTCTGGAGTCAGATCTCCGTGCACTTTCCGGTGAAGCTCGCCGGAGATACCCTGCTATTAAAGACGGAGCTGAGCACGCTATCTTAAAGCTGCGGTCGTTATCGAGTCCGGATGAAATTGCACATAATGAAGATATTTTGCGCATCTTTCTTATGGCTTGCGAGGTTAAAACTGTCAAGCTTAGTGTCATTGCATTGTCTTGTATGCAGAAGCTTTTGTC…
LOC108204602	TTTAGTCACAACTTTCTTAAGTGAGATAGTTTGTTGATGTTTTTGTTACATAACAAATACAATAAGAAGTGAAAGCTTGGCATTTCAAACTTTTTGACCATCATAAAAGGTTTTTCTACATGTTCAGCTAGTGATATAGACTATGTTCGGTTCATAGTTGTCCTGTCCTCACTGAGATGCTTTAAGCCAACTTTAATATCTAGCAATTATTTCAGGTTTTGCTTGATAGAGTTGAACACTTCATTCAGGCAGTTGCCGTTTACGAAGATCAAATCTTTCAAAAGCGGGCTCGTCTGCAGAAGGCACAAGAGAACAACGAAGAGATGCGAAATAAAGCAAGGAAAGAGGTTAAAGATGTAACACAAGCTGTTGCTGTTGACAAGGTGAAATTAGGGGAAC…
LOC108204438	CGTCCATCGATTAAAAAGAAACGCGCAGAAAGGAGAAAATCTAGAGAGAGAAGGGAGAAAGGGGAGAACACATATATACATACGTTTACCGGAGGTGACCGACCGTCGGAGCTGAAGATGAAGAACATATTTAAGAAGCTACATATTGGTGGCAGCAATCACGAACCTTCTAGTACTAATTCTAATCCTAATCGATCGAATGAGACCAATAATACGACTAATATTACTGGTGCTCATCGATCGAATGAGACTAGTAATACTAGTATTAACAATACTAGTATTACTAGTACAACGACGGGTAGTACTCCTACTCCGCCGTCGATCGTTTCGAGTATCTCCGATCATCATCATAATCAGGATTACTATACTTCGGAAGAGGAGTATCAAGTTCAATTAGCC…
LOC108204552	TTTTAAGGTTGGGATTGAATCGTCAACACCGCTTCGATCTCGTCTTATCCATTGTTGATCGGAGATGATGATGACGTCGAGGATGACGACGATCACAATGATTCACGCCGCTGCTCCTCCTCGCCGATTTCCCGGCCCAAGCTGCCCCCGCCGCCCATTTCTCAAAACCCTAAAACCCCAATTAAGAATCCTCACACTCACAAACTCCTCTGCGCACCCTCCTCCTCCCTCCATCTCTGCAAAACCCTCTTCTCAGTTGCGAAAAACTCGGAACACCGCCGTCGACGACGACAGCAAGCTCACCGCGCTCCGCTCCCTCTTCTCCACTCCTAGCAATGCTATTGACGCTTATATTATCCCTTCTCAAGATGCTCATCAGAGTGAATTTATTGCTGAGTG…
LOC108204247	TGCTGGATTGAAGTAAAATATATGTCGGTCTGAAAAGCCCGTGGGCCTGTGCAATCCCAAACGCAAAACTCAGAAATCTAGAGAGAGAGAAGGTGGTGTTGCAGCTTTTGAAATTCAAGTAGTGTAAGTGCTACTATGAGTGAACAGTGAAGTGAGTGATGAAGAATACACCGGATAATCATCACTTCAACAACAGCGCTGAAGAACAAGACGAAGATGTCAAATTATCATCTCTGCGCTCTAGGGTTCGGAAAGCTCAAGTCCAAGCGCTCAACTCTTCTCCGTCGTGGCCGGATAAACAACAACAATTAGTGCTTGATGGTGATGATGTTGACGAGGATGGTGATGAGTCAGCAGCATCCGATTCGGTTCGGTTTGAAATTGGGGATTTGGTTTGGG…
LOC108208475	ACTTCATCCTTTTAAATACTTATATTGATTATTTTAAAGTGCAGTGCAAAACCGAGAAGCTCAAGAAATGAAGAATCAAGGCTCTCAACTGCAGGCTGATGAAGGCCTTGGGAGTTCTAGGCCAATAGCCTTCAAAAGTGCAAGATTCAAAGAAGAACCAAAGGGAAATGATCCCTACATAGAAATAACTGTAGATGTTGCAGATGATTCTGCCCTGGTGCAGAGCATAAAGGGCACTCCTGATCAAGAAGCAGCATTGTTAGCGAAACGCCCTTCGTTTTCTTCTCAGCTCTCCTCCAGGCTGAGAAGAGTTTCAAGGGAGTTGAAGAGTAGCTTTTCTAGTTCTCCGAGGAAAAGTACCTCTGATAACAAGGGGGTTAAGCACTGCCCCTCGGGGAC…
LOC108204823	TTTGTGGGGCTATAAAGTGATGCGGCTCCTCGGATAGCAATGAAGAACACGCAAACACACGAACTGGTCTGAATGATATGTGAGTGATCTTTGTAATAACAAAAAATCAATCACATTAAAACCACCACCTTCATTCACAATCATGTATAGATTAAGGGTATGCACCAAATTAGCAGCCAAAGATCCAAGAAAGACTCTTAATTGCTTATCTTCCCTTCAATCTCTAAGATCGAAGCATTCATTACCTTTTGCCACAGTGGATGTAGACAGTTTATCAGGCAGCCAACCTGCTGAAGTACAGAATTTAGTGCAGGGAAATTGGACAAAGTCTTCTAAATGGAATACACTTGTTGATCCTTTAAACGGTGAACCATTTATTAAAGTTTCTGAGATAGATGA…
LOC108205282	GACATTTTCAATCAATGCTGCATAATGGTGGAGGAACAAGTTGTGCGCTGTTCGGCTTTATACCTAGGATAATGCCATATTTCATATGTATCTGAAGCATCTGTCAGCAGAAACCGGAGTACTATTATAGTTCCAGCAGGAAGTACAGGTGATGAAGGTTGGGTAGCATTCAGGAATATCTTGGGAGAGATACATGAGGCTTCCAGGCTTTTCCTCATGTCCAAGCAGGAGAGTTCTGAGCCATCAGAGCGGTTAGTTGGGCTGTCAGATGATGTCGGGGTGGGATTTATATCTGGCCACAGTTCTCAAGCGGTCTCGGCGTCTGAGTTGAATGCAGAAAAGTCAATTGATCTGCGCTCAGCAGATGAAACTGGTAACATGGGAACCTCTAAAGTTATC…
LOC108205282	TAAAAACTCGGTAACTAAACAGTCCTATAGCAGTAAGATTATTTTATACATGTATAATACAACCCGATCCAGATAAAAAAAACCAGTGCTTCCTCCTTGAGCCGGGTCAATTCAATTCCACTCCACTCCGATCTTGAATCATGATGGAAGCCAATTCCGGCGGCGGCGGCGGCGGGAATGACGTAGAGCTACTCTGCAAGACTTTACAAGTGGAGCACAAGCTCTTCTACTTTGATCTCAAGGAGAATCCGCGTGGTCGCTATCTTAAAATCTCCGAGAAAACCTCCGCTACGAGGTCGACTATTATTCTTCCTTTGAACGGCATCTCATTCTTTCTTGATCTCTTTAATTACTATGTCGATTCGGATCAACACGATGCTTGTAGCAAAGAGCTTCAGC…
LOC108205017	GTAAAACAAAAACTTCAATTATTGCTCAAAGGTACCTGTATATATCAGTAGAGTTTCTACATCGAATAAATAAGTCTGCTTCCATCAACACATGGAAGTAAATTATGCAGGCCAACAATGAAAAATGTTGAAACCAAAATTTCAACTGAACAATACTGATCATAGTGAAAGTTCTGTTTTAGATCAGACGAGGCAAAAATAGGTTGCTAACACAACTATCAATCAGCATAAATTCAACACCAAATTGAGAACGCATTACTTCACGGTGACAATCTTGATCACGGATGCAGTTCCAACACGATGTAGGGCCACTACAGCATCTCCTACCTTGCAGAGACCTTTTGTCTTTGCATGCTGCAAAGCAAAGTCCAGTGCTTCTTCAATCCTGCACACAATACA…
LOC108204563	AGGCAAGGGTTGTAATGTTATCCACAAGGACCAAGAGAAGCTAATAATTAGTGAAGCCATGGAAATGAGCAGCTCTGCACTCGTCTCCTTTTCTGCTTGTTCTCACCTGACAAAACCTCAATTCTTCTCCTTCAATTCCATCTCTTTGTTATCTTCCACTTGTTCTTCTTCTACAAATATTATATCCACTCTTAATTTTAGTAATAACAATAGTAATTCACCAAGATTTACGTTCCTTCGCACTAACGCCATTGCTCTCCATGCTCTCACCACTCCTGTTTCTCAACAAAATGATGACAATGATGATAGTAAACAGCTGCCCCACTTGCCTAAAGTTGATAAGAGCGGAAGGTTTTGCAGTCCCAGAGCCGCCCGAGAACTTGCTCTGTCTATTCTATA…
LOC108214601	CCTTCCTCAATTTCAGCGTCCCATTCATACATGACCCCATTTTTGTCCTTTCACATCCTCCTGGATAATCCAAATCAATTTGGGTCATACCCGACTTGATTGGAGTCATATTTGTTGCTCATCCAGGATAACCCGTTTCTATCTGGGTTTCTAAACTGATTTCTCTCCACCATCTACAATGTCAGTTATATATCTCTTCCTATAATCTAGCATGAATCGTGTTTCTACTCCGCCATTACGGATAACAGTTTATTTTTTAAAATTTTGAATCATGTCACAGTATTTTATCTTCCATTTCAAGATCACTTTTAATCTTTCTTGCTTAATGGATCAGACATGTTTCATCGGACGGCAAGACGAATGCATTTTCTCCTTTATCCACTATCTCCCTCTTCTCAG…
LOC108214601	CCTTCCTCAATTTCAGCGTCCCATTCATACATGACCCCATTTTTGTCCTTTCACATCCTCCTGGATAATCCAAATCAATTTGGGTCATACCCGACTTGATTGGAGTCATATTTGTTGCTCATCCAGGATAACCCGTTTCTATCTGGGTTTCTAAACTGATTTCTCTCCACCATCTACAATGTCAGTTATATATCTCTTCCTATAATCTAGCATGAATCGTGTTTCTACTCCGCCATTACGGATAACAGTTTATTTTTTAAAATTTTGAATCATGTCACAGTATTTTATCTTCCATTTCAAGATCACTTTTAATCTTTCTTGCTTAATGGATCAGACATGTTTCATCGGACGGCAAGACGAATGCATTTTCTCCTTTATCCACTATCTCCCTCTTCTCAG…
LOC108215051	GAGAGGAGAGGGGGTAAAAGAACGGGGGTAAATTACGATGGTGATTCTGCGTTCAGGGAGGATTTTGAAAACCGGCTGTTCTTCTTCGTCTTCATCATCTGTCGCCTCGATAAGCCCTAAACAAGTTTCCCATTTCAAGTTACCAAAGAAACCCGGGTGGACGACGGTTAAAAAACGAGCTGATGATCCATCTATGCCATATATAACTGAAGCCTTGAAGTCCTATAACCAAAATTCCGGTAAAAGATATAAATTAGTGGATCCAGGTAGTCTTACAACTGTTATTCTGGCGAACTACTTCCTTTACCATATTGACTTTGAGGCTAAGAACACTGATGCTCCTCATGCTTCAACGGAGATGTTTTTTGCCGAGCTCACATCTCCTAGCGCTTGGCAGGT…
LOC108205286	TAATCATCCCCATATAGTCGACATCCTGAACCCAAGAAACAATTCTGTAGCATAAGCTTGCTTTACATTTCCCCGCTCCTAATCGTCTCTCAGGTATGGCTGAAGAAGCTGGGATGTTTTTTGTTCAACAAACTGTTGGCAGTGTTTTATGCTGCAAATGTGGTATTCCAATGGCACCAAATGCTGCAAATATGTGTGTCAAGTGCTTACGTACTGAAGTTGACATTACAGAGGGTTTACAAAAGCATGTCATTATCGTTCATTGCCCAGAATGCGATACGTACTTGCAGCCACCCAGAACTTGGATTAAAGCACAACTTGAGTCGAAGGAACTCTTGACCTTTTGTGTAAAGAGAGTAAAGAATTTGAATAAGGTTAAGCTAGTCGATGCGGGTTTTA…
LOC108204987	AAATAATAGGAAATTGATGTCGCTCCCGTGTTCAAAAAAACAAAAAACCAAACTGAAGAGAGAGGAGAGAGAGTAGAATTGTGAGGGCTAAAAAACAAAAATCTGTATTTGAAAGATGAGCCTGAGGGAGTGAAGTGTTGTTTTTTAAGTTTTTACTTGGAGAGAGATATCTCTGTGTGGGAGAGAGAAAAAAGAGAGATAGAGATTGAGAGAGAGAGATAGAGCATTTTGGGTTTTAGTGGGTGTCTTAGTTTGTGCTAGTAGTGTGTGTTTTGAGTGGTGGAGCTGAGCTTTAAGCTCAAGAACATCTCATAAGCAAAAAGCAACAAGCTTTGAACCAAGTTTATTTCAAGATTTGAAGGTGGGTGGGAAAGGGCTTAATTAGTTAAGCATTTCAAT…
LOC108204670	CGACAAAAACAAGAACTCTTCAAAACTCACACCACTCGCACGGTAAAACTAACTCACCAAGCACAACACAACACAGAAGCTTTCTGGATCGTTGTAATTCGTAACTGACTTGGTGTTTTATGATAACATTATTATTTCCGACTTCGTATTGGTGAGGTGGAACTTGGGGGATACTTGGCCATTTTTTGAGAAGTTCCTCAAACGGTTCGGCATTGCAATTTGCCTAGTGGTATAGTTTTAAAGGCCAACAGGAGCAAATATTTATTCTAGAAAAGACGAAAGCTACATCAGCTAGCTTTTAAGACATAATCTACGGGAACTCGGGTGGAATTTAGAATTTGGATTGGTTTGTATGTGATGGTGGGCTTTGCTGAAGGGCTTTAATGGAGAACACAGATT…
LOC108208661	CTTCTTCTTCTTCTCTTTTTTAACATGACTGGGATTTTAATTATATTTCTCCGTCTCTCACAAATTTAAAAAATTGCTCTTCATTGTTCACTGCAGATGATTCATTAGAACTATTTTTGAACAACATAGGTTTAATTTTGTAGCAGTGATACGCAGGTATTGTACTCCTTTTCTTTCTGTGTTATATTCGTAGAATAATGATTGTAGTTGTGTGATGTTTCTTTAGTAATCTTTATTTTTCTATATTGTTTCATGAATTAGCAATTATATCAAGTGTTTGATAAAATTTCTCAAAGAACATTTCAAGAAGCGGCCTATGAATACATCATTTTCTTATATTTTGTGTGGTTCTTGGACTTGGACTGTGGTGCAGAGGAGTAACCATCTTGAAGATTAACT…
LOC108208661	CTTCTTCTTCTTCTCTTTTTTAACATGACTGGGATTTTAATTATATTTCTCCGTCTCTCACAAATTTAAAAAATTGCTCTTCATTGTTCACTGCAGATGATTCATTAGAACTATTTTTGAACAACATAGGTTTGATATTTGATTTTTTAGGAGCAAAGGTTTAATTTTGTAGCAGTGATACGCAGGTATTGTACTCCTTTTCTTTCTGTGTTATATTCGTAGAATAATGATTGTAGTTGTGTGATGTTTCTTTAGTAATCTTTATTTTTCTATATTGTTTCATGAATTAGCAATTATATCAAGTGTTTGATAAAATTTCTCAAAGAACATTTCAAGAAGCGGCCTATGAATACATCATTTTCTTATATTTTGTGTGGTTCTTGGACTTGGACTGTGGTG…
LOC108213602	ATTTTTGATAATTCATTTAGTTTCCTGCAAAAGAACAAAAACATTAACCAGCAATTCGTGATGAACATAAACACTCTGCTACTCCCAGGACCTATTCCCACACTGCTTTCAATTTAGATAGAAATCCGTGATCTCGCTGATTATTTATTTCTTCTTCAAATCTCCACAGCTTTAGGTGTAAACTCTATCCAAGCTCAAAGTCTAAGTTGCTCCTAAATTGACCCGGATAAAGACTTCTTCTTCAGATTGGTCCTTTGGTCCTGAGCTCTCTGTCTCTCCGAATCACACGAAACTGAGAGCTCTTCAGACCTTGGAGCTGACACATGCTGCAATTGAAAATCCTCGGACTCTGTTCTATTATGATTAGGAAACAGCTCTTAACCATGTAAAGAGTGCAGG…
LOC108213602	ATTTTTGATAATTCATTTAGTTTCCTGCAAAAGAACAAAAACATTAACCAGCAATTCGTGATGAACATAAACACTCTGCTACTCCCAGGACCTATTCCCACACTGCTTTCAATTTAGATAGAAATCCGTGATCTCGCTGATTATTTATTTCTTCTTCAAATCTCCACAGCTTTAGGTGTAAACTCTATCCAAGCTCAAAGTCTAAGTTGCTCCTAAATTGACCCGGATAAAGACTTCTTCTTCAGATTGGTCCTTTGGTCCTGAGCTCTCTGTCTCTCCGAATCACACGAAACTGAGGAAACAGCTCTTAACCATGTAAAGAGTGCAGGGCTCCTGGGTGATGGATTTGATTCGACTACAGAAATGTGTACAAGAAACCTGATATGGGTGGCCACCAAA…
LOC108213602	ATTTTTGATAATTCATTTAGTTTCCTGCAAAAGAACAAAAACATTAACCAGCAATTCGTGATGAACATAAACACTCTGCTACTCCCAGGACCTATTCCCACACTGCTTTCAATTTAGATAGAAATCCGTGATCTCGCTGATTATTTATTTCTTCTTCAAATCTCCACAGCTTTAGGTGTAAACTCTATCCAAGCTCAAAGTCTAAGTTGCTCCTAAATTGACCCGGATAAAGACTTCTTCTTCAGATTGGTCCTTTGGTCCTGAGCTCTCTGTCTCTCCGAATCACACGAAACTGAGGAAACAGCTCTTAACCATGTAAAGAGTGCAGGGCTCCTGGGTGATGGATTTGATTCGACTACAGAAATGTGTACAAGAAACCTGATATGGGTGGCCACCAAA…
LOC108213602	ATTTTTGATAATTCATTTAGTTTCCTGCAAAAGAACAAAAACATTAACCAGCAATTCGTGATGAACATAAACACTCTGCTACTCCCAGGACCTATTCCCACACTGCTTTCAATTTAGATAGAAATCCGTGATCTCGCTGATTATTTATTTCTTCTTCAAATCTCCACAGCTTTAGGTGTAAACTCTATCCAAGCTCAAAGTCTAAGTTGCTCCTAAATTGACCCGGATAAAGACTTCTTCTTCAGATTGGTCCTTTGGTCCTGAGCTCTCTGTCTCTCCGAATCACACGAAACTGAGAGCTCTTCAGACCTTGGAGCTGACACATGCTGCAATTGAAAATCCTCGGACTCTGTTCTATTATGATTAGGAAACAGCTCTTAACCATGTAAAGAGTGCAGG…
LOC108213602	ATTTTTGATAATTCATTTAGTTTCCTGCAAAAGAACAAAAACATTAACCAGCAATTCGTGATGAACATAAACACTCTGCTACTCCCAGGACCTATTCCCACACTGCTTTCAATTTAGATAGAAATCCGTGATCTCGCTGATTATTTATTTCTTCTTCAAATCTCCACAGCTTTAGGTGTAAACTCTATCCAAGCTCAAAGTCTAAGTTGCTCCTAAATTGACCCGGATAAAGACTTCTTCTTCAGATTGGTCCTTTGGTCCTGAGCTCTCTGTCTCTCCGAATCACACGAAACTGAGAGCTCTTCAGACCTTGGAGCTGACACATGCTGCAATTGAAAATCCTCGGACTCTGTTCTATTATGATTAGGAAACAGCTCTTAACCATGTAAAGAGTGCAGG…
LOC108197995	AAAGGGTTCTGATCACCGGCGTGCTACCAACGTTGGTGCAAGACTTGATGCACAACAAAAGAAGCTTAATCTCCCAATTCTCCCAACTACTACCATTGGATCTTTCCCTCAAACTGTTGAACTCAGAAGGGTGCGCCGTGAATACAAGGCAAAGAAGATTTCAGAGGAAGAATATGTTAATGCCATCACAGAGGAAATTAGCAAGGTTGTCAAAATACAAGAGGATCTTGATATTGATGTCTTGGTCCATGGAGAACCATAGAGGAAGAATATGTTAATGCCATCACAGAGGAAATTAGCAAGGTTGTCAAAATACAAGAGGATCTTGATATTGATGTCTTGGTCCATGGAGAACCA
LOC108198366	AACATAGCAATTGTTTATTCATACAAATCTCTACTAGAGACAAAACATCCAAGAAACAAGGGCTTCGATAGATCTTTTGTCCCCAATATGAGGAGAACCGTGCGCTTCGCAAGAGCTTTTGAATTAGATCCAGAAAAGTTAAACGATGCTCAAGCTGATCATTACATAAGCCGTCTATGAGCAACACCTGATAAGTGGAAAGCAGATTCGTGTCTCTATATTGATCCTTTGTTGATAAAAAGCTACTATGAGAAAAAGGATGGACGGAATAAAGTGTTCAAATGCTTTCAGAAAGGGAATTTTTTTGATAGGAGATATGTTATTTTCCCAATCTGTCTGTGGAATCACTGGGTTTTGTTGATATTATGTAACCCAAACCATGAGCTCAAAGGGGGTAAA…
LOC108202665	GGCAACTGTGAAAGGCCTGCAAATGGAGCTGACATATACATACAAGTCCACCTTATAGATTCCACATTTGTCCTAATCACTTTGTCCATCTGCTTCTTACATCTCATCTGCCTACTCAAATCCCTCTCTTCCTCTTGGATCCTCACTTAAACAATTCACAATAATGCAATTTGTTTACTCCCCAGCTCAAGAATCAGTCTCTTTCAGTCTTTTTCCATTAATCCAAACCTCATTTAATAATCTTCTTGTTTATCTTTCAAACCCCATGTCATTTTTTGCCTGGATTTTTCAATACTTATTGTTGGGTCTTGTGTTGGGTGGAGGTTGATCAAGCTGTATTCACAGCAAAGTTGAAAAAGGAATTTGGTTCTAAAAGTTATTCTGAAGTTAGCCTGAATG…
LOC108202687	GCACGTGAAAGGATAGTACTAGAAACCTCAGCCTGTAGAAATCCAACAATCATCAAACAATATATCTCTGTACAATCGTGAGGCACATCTAGACCTAATTTTCACATCATCTAATCTCGAAAGGAAACACCCATATGGATTTTGGAAGTGCTAGAAAGAGGGCAAGACCTGAAGCTCCTGCCTTGAATGGCAATGCTGCTTTCAAGAAGTCCAAGCAAGCACTGCAGGGTGTCCATTTGGAGAGGGATGCCATTTCTTACATTACGTACCAGGTGGCATCAAAGCTGTAGCCCAAATGACTGGCAACAATCCAGCAGCCCCTGCCCGAAATCATGGGCAACCATCATTTGGACAACCATCATTTCCCGACGGTTCGTCACCCCCGGCAATCAAATCCCG…
LOC108227747	GCCCAATGTAATCCCCCAAGCCCATAAAATAATTCATTGCGTTAAACCCTAGCAGAAGAGGACATCTTGTGTTATATATTTATATACACCACCATTGTTGGCCGCCTCTTGCTCAGCCAACTCGCACTCCCTTTGCATTCTTTTCATTTCACATCGGAGCGAAGATGGTTGCCGGAAAGAAGACGAAGAAGACTCATGAGAGCATCAACAACAGGCTGGCTCTTGTGATGAAGAGTGGTAAATACACTCTCGGTTACAAGACTGTGCTCGAGTCTCTCAGAAGCTCCAAAGTTGATTATAATATCGAACAATTGCCCGCCTTTGAGGAAGTCAGAGATCGAATACTATGCCATGCTTGCAAAGGTCGGGGTGCACCATTACAATGGAAACAATGTGGAC…
LOC108227309	CTATATATTCCACACAGAGCACAACACAACACTTCTGTCACTCTACTCTTCACTCATCTCTCCGTCGTCGCCGATGGCCGCCGAAATTCCCGGCGAAACTTTCGAATCCCCTCTCTTAGCCTCCCACTCACCCTCCCTCCTCCACCAGATCTCCGAGCACGGCGGCTACGCTTACGTCAGCATGTACACGCTCGGCGCCGGCGGCGATCACCGGGCGGCGGAGGCGGCGCGTGAGATGGCGTGGGAGCAGCTGCACTCGGGGCCGTGGAACTCGGTGCTGCCGGTGTGGAGAGACGCCTACTCGATGGCGTGTTTGTTGGTGGCAAAGCATTGCTGTGCCGTAGGGGAGTATAAGGAGGCGCTTAGGGTTTTGGATTTGGGGGTTATCATGGGAGGCCT…
LOC108227309	CTATATATTCCACACAGAGCACAACACAACACTTCTGTCACTCTACTCTTCACTCATCTCTCCGTCGTCGCCGATGGCCGCCGAAATTCCCGGCGAAACTTTCGAATCCCCTCTCTTAGCCTCCCACTCACCCTCCCTCCTCCACCAGATCTCCGAGCACGGCGGCTACGCTTACGTCAGCATGTACACGCTCGGCGCCGGCGGCGATCACCGGGCGGCGGAGGCGGCGCGTGAGATGGCGTGGGAGCAGCTGCACTCGGGGCCGTGGAACTCGGTGCTGCCGGTGTGGAGAGACGCCTACTCGATGGCGTGTTTGTTGGTGGCAAAGCATTGCTGTGCCGTAGGGGAGTATAAGGAGGCGCTTAGGGTTTTGGATTTGGGGGTTATCATGGGAGGCCT…
LOC108227309	CTATATATTCCACACAGAGCACAACACAACACTTCTGTCACTCTACTCTTCACTCATCTCTCCGTCGTCGCCGATGGCCGCCGAAATTCCCGGCGAAACTTTCGAATCCCCTCTCTTAGCCTCCCACTCACCCTCCCTCCTCCACCAGATCTCCGAGCACGGCGGCTACGCTTACGTCAGCATGTACACGCTCGGCGCCGGCGGCGATCACCGGGCGGCGGAGGCGGCGCGTGAGATGGCGTGGGAGCAGCTGCACTCGGGGCCGTGGAACTCGGTGCTGCCGGTGTGGAGAGACGCCTACTCGATGGCGTGTTTGTTGGTGGCAAAGCATTGCTGTGCCGTAGGGGAGTATAAGGAGGCGCTTAGGGTTTTGGATTTGGGGGTTATCATGGGAGGCCT…
LOC108226805	TGAGTACTGACCCAGTGACCTGTTAGTTTACTGATCCTGCAAAATCCCAGGAAGAACGATTCTACTATATAGTCTAGTATATTTGTTCTGTTGCATGCGAACTCAAAGGGATAAAATGATGAGCTAATAACTTCTTACAATAATATCTTATTTTCAGCTACACTTTTACTTTCAGTTAGAGCTTTTATGTCTTTTTACTATAATTCTGACCCTATTCATTATCTTTTGAAAAAAAATAAAAATTGATCAAGAAGTGATGTTACTAATTTTTGTAATCTTTTGACTTTTTCAGCTTCTTTAAGTTGGTGATTCTGATCTTCAACTACTTCCAGGTTTTCTATATATTTGTGCTGTTAAATCTTTGCTTTTTAGTGGTTATGATTTGGTTTTCTCTTATGT…
LOC108226805	TGAGTACTGACCCAGTGACCTGTTAGTTTACTGATCCTGCAAAATCCCAGGAAGAACGATTCTACTATATAGTCTAGTATATTTGTTCTGTTGCATGCGAACTCAAAGGGATAAAATGATGAGCTAATAACTTCTTACAATAATATCTTATTTTCAGCTACACTTTTACTTTCAGTTAGAGCTTTTATGTCTTTTTACTATAATTCTGACCCTATTCATTATCTTTTGAAAAAAAATAAAAATTGATCAAGAAGTGATGTTACTAATTTTTGTAATCTTTTGACTTTTTCAGCTTCTTTAAGTTGGTGATTCTGATCTTCAACTACTTCCAGGTTTTCTATATATTTGTGCTGTTAAATCTTTGCTTTTTAGTGGTTATGATTTGGTTTTCTCTTATGT…
LOC108227417	TAATAGTCCAACCATTCCTCATTTGCCATTGCCCAGTCCAGCCTTTCTTTTAAGTATCCATCACCATTAGTTCTAAACCATGTAAAGTGCTCACCTATATAATCCAGAGGGTGTAGATTACATACTTCCAAGGAGATACGAAATGCTTCAATCTGTGTTTCATTCCTTGGCTCCCCTCCTTCTTTATCTGCCTGACTTAGAATTATATACTCCCTCCGTCCCCCTGAACAGTACTCCCTCCGTCCCTTTTTACATGTCCCCATTTGACTCTTGACCAGTCAAATTGACCAAATTTTGACTAAACATTACAAATTATCTATTCATTATTTTCGAAATCAGAATTATCACAAAGACACAAACAACTAAATCGTCGTTATACCCAACGATCAGAAACCTGGA…
LOC108227417	TAATAGTCCAACCATTCCTCATTTGCCATTGCCCAGTCCAGCCTTTCTTTTAAGTATCCATCACCATTAGTTCTAAACCATGTAAAGTGCTCACCTATATAATCCAGAGGGTGTAGATTACATACTTCCAAGGAGATACGAAATGCTTCAATCTGTGTTTCATTCCTTGGCTCCCCTCCTTCTTTATCTGCCTGACTTAGAATTATATACTCCCTCCGTCCCCCTGAACAGTACTCCCTCCGTCCCTTTTTACATGTCCCCATTTGACTCTTGACCAGTCAAATTGACCAAATTTTGACTAAACATTACAAATTATCTATTCATTATTTTCGAAATCAGAATTATCACAAAGACACAAACAACTAAATCGTCGTTATACCCAACGATCAGAAACCTGGA…
LOC108227417	TAATAGTCCAACCATTCCTCATTTGCCATTGCCCAGTCCAGCCTTTCTTTTAAGTATCCATCACCATTAGTTCTAAACCATGTAAAGTGCTCACCTATATAATCCAGAGGGTGTAGATTACATACTTCCAAGGAGATACGAAATGCTTCAATCTGTGTTTCATTCCTTGGCTCCCCTCCTTCTTTATCTGCCTGACTTAGAATTATATACTCCCTCCGTCCCCCTGAACAGTACTCCCTCCGTCCCTTTTTACATGTCCCCATTTGACTCTTGACCAGTCAAATTGACCAAATTTTGACTAAACATTACAAATTATCTATTCATTATTTTCGAAATCAGAATTATCACAAAGACACAAACAACTAAATCGTCGTTATACCCAACGATCAGAAACCTGGA…
LOC108227127	CGAAGCTGATAACAAACAATGAATGTGAAACATCTGATGGGCTACCTTATTCATTTTCTTTTCACAAAACTAATCGATAAACACTTGGTTTGCTCTCAGAAGATTGCCTATTTTAAGTTTGAATGCCTATTTGCTTTGTTAGAGCATGCACATACTTAACAGGGAGTCCCATCTATAATTACTAATTGATGCATCTCTACCATGGTCTAGAGGAGACTAGATGCTTGATAAAAGTTCTGCTAGAGATTTTGCATGGTGGGTTTTAACGATTTATGGGAAAGGATGATAGACATTAGTCAACTGGGAGTTTCCAAGAATTGAGCCTGATGATGATATGATGCTTGTGGTGCTCTCATCATGTGAATTATAAAGCAGCATTTTAATATTCCTTGAAGTTTA…
LOC108226968	GGGAGACAAAAATAATCAAATGTATAAATTAAAAAAACTATAGCAACTAATAAATTGAGAATTTTTATTGATCGACGTCTAATAAATATGATACATTTAATGGAAAGTTGGGTATCACATAGATAAAGATACAGCATAAATCTAAGTTCTAAACTTGTATACCCGCGTATAAAGGAATAAATATTGAACTCATATATATGTCGTATCATGTCACTAACAAACTGTTTATGCATGATTTCATAGGCCCTTTCATTTATTCTTCAACTGGTCGATTCTATTTTCTAGCACCCGCCGCAAATGTATCAAGGCCTAGGCGGGAGGCGGAGGAGAGGTGTAGGAGTACGGTGGAGGAGAAGATGGTGGTGGCGGTGATACGTATGTATATGCTTTTGGAGGAGA…
LOC108226968	GGGAGACAAAAATAATCAAATGTATAAATTAAAAAAACTATAGCAACTAATAAATTGAGAATTTTTATTGATCGACGTCTAATAAATATGATACATTTAATGGAAAGTTGGGTATCACATAGATAAAGATACAGCATAAATCTAAGTTCTAAACTTGTATACCCGCGTATAAAGGAATAAATATTGAACTCATATATATGTCGTATCATGTCACTAACAAACTGTTTATGCATGATTTCATAGGCCCTTTCATTTATTCTTCAACTGGTCGATTCTATTTTCTAGCACCCGCCGCAAATGTATCAAGGCCTAGGCGGGAGGCGGAGGAGAGGTGTAGGAGTACGGTGGAGGAGAAGATGGTGGTGGCGGTGATACGTATGTATATGCTTTTGGAGGAGA…
LOC108226968	TAATCAAATGTATAAATTAAAAAAACTATAGCAACTAATAAATTGAGAATTTTTATTGATCGACGTCTAATAAATATGATACATTTAATGGAAAGTTGGGTATCACATAGATAAAGATACAGCATAAATCTAAGTTCTAAACTTGTATACCCGCGTATAAAGGAATAAATATTGAACTCATATATATGTCGTATCATGTCACTAACAAACTGTTTATGCATGATTTCATAGGCCCTTTCATTTATTCTTCAACTGGTCGATTCTATTTTCTAGCACCCGCCGCAAATGTATCAAGGCCTAGGCGGGAGGCGGAGGAGAGGTGTAGGAGTACGGTGGAGGAGAAGATGGTGGTGGCGGTGATACGTATGTATATGCTTTTGGAGGAGACACGGAAGGAGG…
LOC108226968	GGGAGACAAAAATAATCAAATGTATAAATTAAAAAAACTATAGCAACTAATAAATTGAGAATTTTTATTGATCGACGTCTAATAAATATGATACATTTAATGGAAAGTTGGGTATCACATAGATAAAGATACAGCATAAATCTAAGTTCTAAACTTGTATACCCGCGTATAAAGGAATAAATATTGAACTCATATATATGTCGTATCATGTCACTAACAAACTGTTTATGCATGATTTCATAGGCCCTTTCATTTATTCTTCAACTGGTCGATTCTATTTTCTAGCACCCGCCGCAAATGTATCAAGGCCTAGGCGGGAGGCGGAGGAGAGGTGTAGGAGTACGGTGGAGGAGAAGATGGTGGTGGCGGTGATACGTATGTATATGCTTTTGGAGGAGA…
LOC108226968	TAATAAATTGAGAATTTTTATTGATCGACGTCTAATAAATATGATACATTTAATGGAAAGTTGGGTATCACATAGATAAAGATACAGCATAAATCTAAGTTCTAAACTTGTATACCCGCGTATAAAGGAATAAATATTGAACTCATATATATGTCGTATCATGTCACTAACAAACTGTTTATGCATGATTTCATAGGCCCTTTCATTTATTCTTCAACTGGTCGATTCTATTTTCTAGCACCCGCCGCAAATGTATCAAGGCCTAGGCGGGAGGCGGAGGAGAGGTGTAGGAGTACGGTGGAGGAGAAGATGGTGGTGGCGGTGATACGTATGTATATGCTTTTGGAGGAGACACGGAAGGAGGTGGTGGTGATGGGGACGGTGGAGGCGGTGATGGTG…
LOC108226968	GCAACTAATAAATTGAGAATTTTTATTGATCGACGTCTAATAAATATGATACATTTAATGGAAAGTTGGGTATCACATAGATAAAGATACAGCATAAATCTAAGTTCTAAACTTGTATACCCGCGTATAAAGGAATAAATATTGAACTCATATATATGTCGTATCATGTCACTAACAAACTGTTTATGCATGATTTCATAGGCCCTTTCATTTATTCTTCAACTGGTCGATTCTATTTTCTAGCACCCGCCGCAAATGTATCAAGGCCTAGGCGGGAGGCGGAGGAGAGGTGTAGGAGTACGGTGGAGGAGAAGATGGTGGTGGCGGTGATACGTATGTATATGCTTTTGGAGGAGACACGGAAGGAGGTGGTGGTGATGGGGACGGTGGAGGCGGTGA…
LOC108226968	TAATCAAATGTATAAATTAAAAAAACTATAGCAACTAATAAATTGAGAATTTTTATTGATCGACGTCTAATAAATATGATACATTTAATGGAAAGTTGGGTATCACATAGATAAAGATACAGCATAAATCTAAGTTCTAAACTTGTATACCCGCGTATAAAGGAATAAATATTGAACTCATATATATGTCGTATCATGTCACTAACAAACTGTTTATGCATGATTTCATAGGCCCTTTCATTTATTCTTCAACTGGTCGATTCTATTTTCTAGCACCCGCCGCAAATGTATCAAGGCCTAGGCGGGAGGCGGAGGAGAGGTGTAGGAGTACGGTGGAGGAGAAGATGGTGGTGGCGGTGATACGTATGTATATGCTTTTGGAGGAGACACGGAAGGAGG…
LOC108226968	GCAACTAATAAATTGAGAATTTTTATTGATCGACGTCTAATAAATATGATACATTTAATGGAAAGTTGGGTATCACATAGATAAAGATACAGCATAAATCTAAGTTCTAAACTTGTATACCCGCGTATAAAGGAATAAATATTGAACTCATATATATGTCGTATCATGTCACTAACAAACTGTTTATGCATGATTTCATAGGCCCTTTCATTTATTCTTCAACTGGTCGATTCTATTTTCTAGCACCCGCCGCAAATGTATCAAGGCCTAGGCGGGAGGCGGAGGAGAGGTGTAGGAGTACGGTGGAGGAGAAGATGGTGGTGGCGGTGATACGTATGTATATGCTTTTGGAGGAGACACGGAAGGAGGTGGTGGTGATGGGGACGGTGGAGGCGGTGA…
LOC108226968	TAATCAAATGTATAAATTAAAAAAACTATAGCAACTAATAAATTGAGAATTTTTATTGATCGACGTCTAATAAATATGATACATTTAATGGAAAGTTGGGTATCACATAGATAAAGATACAGCATAAATCTAAGTTCTAAACTTGTATACCCGCGTATAAAGGAATAAATATTGAACTCATATATATGTCGTATCATGTCACTAACAAACTGTTTATGCATGATTTCATAGGCCCTTTCATTTATTCTTCAACTGGTCGATTCTATTTTCTAGCACCCGCCGCAAATGTATCAAGGCCTAGGCGGGAGGCGGAGGAGAGGTGTAGGAGTACGGTGGAGGAGAAGATGGTGGTGGCGGTGATACGTATGTATATGCTTTTGGAGGAGACACGGAAGGAGG…
LOC108226968	TAATCAAATGTATAAATTAAAAAAACTATAGCAACTAATAAATTGAGAATTTTTATTGATCGACGTCTAATAAATATGATACATTTAATGGAAAGTTGGGTATCACATAGATAAAGATACAGCATAAATCTAAGTTCTAAACTTGTATACCCGCGTATAAAGGAATAAATATTGAACTCATATATATGTCGTATCATGTCACTAACAAACTGTTTATGCATGATTTCATAGGCCCTTTCATTTATTCTTCAACTGGTCGATTCTATTTTCTAGCACCCGCCGCAAATGTATCAAGGCCTAGGCGGGAGGCGGAGGAGAGGTGTAGGAGTACGGTGGAGGAGAAGATGGTGGTGGCGGTGATACGTATGTATATGCTTTTGGAGGAGACACGGAAGGAGG…
LOC108227096	TAGAGTGACCCCATCAAATCTAACAATAAATGTAAAAGCCTAATTAATATGACTACCATTTTTGCCTGATTAATCGTGGCACGGACAAGGTCGGTAAGAAAAAAAGAAGCTATCAATCTTCTCCTTGGATTCCAGCATAAATATTCCGCTTATTCTGCCGGAATTTAAGGAACATCTCCGGCGGCTGCTCCGGAGATCCTCCAAATTTTCCGACAGTTTTTTTAACTGTATTACTGGTACGTCTTATGTTTTTTTATTGGCCTCATAGTATATTACTATTTCATACAGGTGGTATGGTTTCAACAACTTGAGGCTTCTTTTAAATGTTTATAGTTTTAATAGTACAAGTTCATTTAAACCAAATGATCAGACTACTTCTTCATGAACTTACTAGTCTTG…
LOC108227547	TAAGTTGCAAGTACTGTTTAAGCAGTTAATAAATGTATTACCAACAGATAAGAGTTCTAGACTTTGTCGTGTCTGTCCTATAAATATATATTACACACACTGACACACACACATACACAACTCATCAGCAGTTATCATCGGGACAGAGAAAGTCTTTCATTTACTTAGATTTATTCTCTGACTTAGTTCCTAGGGTTTCTGTTTCTGCACACTTTTGCTAATGATTGTGCTTATTCCCCGGGGTGCAATTGCTCAAAGTAGCTGAAAAATTAATGACTATGGTCGGACTTGGAATTTTAGAAAATTTAGGGCAGGTTGATTGGTCATTTCTTGGTGCTGGTAGTTGAGTAAACCGCATAAAATATT
LOC108227547	TAAGTTGCAAGTACTGTTTAAGCAGTTAATAAATGTATTACCAACAGATAAGAGTTCTAGACTTTGTCGTGTCTGTCCTATAAATATATATTACACACACTGACACACACACATACACAACTCATCAGCAGTTATCATCGGGACAGAGAAAGTCTTTCATTTACTTAGATTTATTCTCTGACTTAGTTCCTAGGGTTTCTGTTTCTGGAGGTCCACCGTTATTAAGATATGAGAGCCAATCAAAATCTCCCAAGCTTGTAAAATTCCGCGCTTAGCATGTGCCCATGGGCACACACTAGAAAAACCGTTATTAGTAAGCTTTTGGTGTAACCAGTTTTTTCAGGCGGTGTACTGGTCTTAGTGTTTTCCTTTAGTTGGTTGTTGTACTAGAATGCTGTT…
LOC108227810	TAACCTTGGCTTTCAGAAGCAATGTTCCACGCCCACACTGAAGCACCCGGTTCATGCTCGACTCCTTCAGTCTTCCACGCCCACACTGAAGCACTGATTCCACGATGATTAAGAGAAGTGATCAGTAACAAGAAGTTACCCAAATGAGGATTCATTAGACAAATCCATGGAGAGTGATAGAAGAATATGTGGCAGATTGATTTGTTCTGTAGCCAAAGAATCTCCACAGCAAGTCGAAGAAACGACCATGGACATGCGAAAGTGAGGAACAAACAGTTGGCTGCTCCAACCACAGTGTTTATTCGAGATTCGAAGGTATCACCAACAACTAATTCTTCTTCAGTATTTGGATATTCTCAGATTATCTGGCTTGTCACAATCAAGAGTTTGCTATAACGA…
LOC108227810	TTCCTGCATATTCAATATCCCAGGTGACTGTTTCCAAAGTTTCAACATAAATGCAGAATGTTGTGAAATACAAAAAACTGGAGTGTTCTTCTGTTCTTGGATTTTAGGGTCATAAAAAAAATCGCTCTCATATGTTGTCACTATAGGAAGATCATTTGTCCAATATCCTAACTGTCGTAGTGCACATGATGATGTAACAACTCTTCCATGTCATGAGCGTGATCAAGTGCCCCTCATTTCAGTGATCCGGTGATACTTTTTGGTATCTCTACTCCTTATTTCATCCGACCTTTAAAATAGGCATTTCATTGGGTTACTTATTCTGCCGGTATTGAAGATAGACTTTCCAAAGAAGTAGTGTCATTTGACATTGAAGATGAACAATTCAATTTTTTTTCA…
LOC108227810	TGTTCAAGCAGTTTAGACATTCCAGATGAGGAGCTAAGGTATGTTACAGTGCCAAAACAATAATCAGGTGACTTGTAGTCTTTCAGAAAAATTACTTTCGCATGTCCATGGTCGTTTCTTCGACTTGCTGTGGAGATTCTTTGGCTACAGAACAAATCAATCTGCCACATATTCTTC
LOC108227810	TAACCTTGGCTTTCAGAAGCAATGTTCCACGCCCACACTGAAGCACCCGGTTCATGCTCGACTCCTTCAGTCTTCCACGCCCACACTGAAGCACTGATTCCACGATGATTAAGAGAAGTGAATTTATCTGATTAACAAGTTTATGTATCTAGCTATCTGATTGTTTTAGATCTGTTAATTCTTCATTTTGTGTGCTTTTTCTGTTTATATGTTCTGTTGTCGTCCCTAGATGTTTGGATTTTTGTTGTTTTTTTGGGTGAATTAGGGTTTCGTGTGATATGAATGTGTTGTTTTTGTTCATACGTTTGGTTGATTTGTGCTTGTGCTTTATTCGTGTTCTAAATGTTAATTTGAGAACCAAATGAATTAAGAATTGAAAACCTTTAGGTTTGTATAGTT…
LOC108227810	TAACCTTGGCTTTCAGAAGCAATGTTCCACGCCCACACTGAAGCACCCGGTTCATGCTCGACTCCTTCAGTCTTCCACGCCCACACTGAAGCACTGATTCCACGATGATTAAGAGAAGTGAATTTATCTGATTAACAAGTTTATGTATCTAGCTATCTGATTGTTTTAGATCTGTTAATTCTTCATTTTGTGTGCTTTTTCTGTTTATATGTTCTGTTGTCGTCCCTAGATGTTTGGATTTTTGTTGTTTTTTTGGGTGAATTAGGGTTTCGTGTGATATGAATGTGTTGTTTTTGTTCATACGTTTGGTTGATTTGTGCTTGTGCTTTATTCGTGTTCTAAATGTTAATTTGAGAACCAAATGAATTAAGAATTGAAAACCTTTAGGTTTGTATAGTT…
LOC108220867	ATTTTCATAATATCCTGCTTTGTTATAAATAATGTTGAGTTCTGGCCAATCTACATGGCCTCGTATTCTTGTCTTGTTGATTCTGTACAAGTTGACAATTTCAGCAAGTAAATCAGTCTCTTACACCAAACACTGTGCTTCTGTTGTCCCTGAGGCAACTCCAACAACTTATGATACAAATGTCACCTTTTCTGAACTGGATACCTTAAATTCTTTTGTGCCAGAGGGTCGAAGAATCTTCCGCGAGAATTCTTCTGTAACTTCTCTCAATTTTCGCTCAGTAGGACGTATCTATGAAACAGATCTTAAAGGTGTTTACAAGATTGATGCTGAGTTGAGAATACGGGTTTATAATTATATTGATGATACTTATGATTTTGTGAGCATCTCGACGTCCTA…
LOC108227465	TGCCTTATCCTCAAAATTTAAAGACAGCGAAAGAGGTGGAGGCTATTGTAAGGGAAAATGGAGCTGAACCAGCTACGATTGCAATTTTAGATGGCATGCCATGTGTAGGCCTGACTTCAGAGGAGTTGGAGAGGCTGGCTACTCTGGGTACCAAATGTCAAAAGACAGCTCGCAGGGACATTGCTCATGTTGTAGCTACTAAAGGGAATGGTGCAACAACTGTTTCTGCAACTATGATCTTTGCTTCTATGGTTGGCATTCCTGTGTTTGTTACTGGAGGTATTGGAGGAGTACACAGATATGGAGAAAATACCATGGATATATCTTCTGATCTTACAGAGCTTGGAAGAACTCCTGTAGCTGTAATATCTGCTGGCGTAAAATCAATATTAGATATTC…
LOC108227465	CTGTCACCGGAATCAAAATTTGGTTTGACGACCAGAATCCTTTATTTTTTATTTTATAAAAATACGGTGACCCGCTGAGACGCTCTCAGGACTTGCTTCTCCTCGGTTTCTTACTTCTGTTATTGAAAAATGGCGCCTACACAATCTACTACCAACAAGGGCTGGTGAAGATTTCCCCCGCTGTTTCTCAAGCTTTGTCACAAGGGAAAGCAGTTGTTGCTCTAGAGTCCACCATAATATCTCATGGAATGCCTTATCCTCAAAATTTAAAGACAGCGAAAGAGGTGGAGGCTATTGTAAGGGAAAATGGAGCTGAACCAGCTACGATTGCAATTTTAGATGGCATGCCATGTGTAGGCCTGACTTCAGAGGAGTTGGAGAGGCTGGCTACTCTGGGTA…
LOC108227465	TTCAGTAATACTAATTCTATTGGTTTATTCAGGAATGCCTTATCCTCAAAATTTAAAGACAGCGAAAGAGGTGGAGGCTATTGTAAGGGAAAATGGAGCTGAACCAGCTACGATTGCAATTTTAGATGGCATGCCATGTGTAGGCCTGACTTCAGAGGAGTTGGAGAGGCTGGCTACTCTGGGTACCAAATGTCAAAAGACAGCTCGCAGGGACATTGCTCATGTTGTAGCTACTAAAGGGAATGGTGCAACAACTGTTTCTGCAACTATGATCTTTGCTTCTATGGTTGGCATTCCTGTGTTTGTTACTGGAGGTATTGGAGGAGTACACAGATATGGAGAAAATACCATGGATATATCTTCTGATCTTACAGAGCTTGGAAGAACTCCTGTAGCTGT…
LOC108226771	CATAATTAGAAGACCTAAACAGAAAGAGATCGAACCACAGAGAGATACACCGAGAAAGAGAACGAGAGAGAGAAAGAGATTTTGTCGCTGGCGAGAATCATCGGAGTTGGCAAGTGACGGCAATTGCAATTTCGCCTCTTTTCGATACCGTTTCGACTCGGTCGAGTTGGTCAGGTTTGTGGATTGTCGCGGAGTTGTCTTGTTTTGTTGGTTAGTGTGGTTTGTTATTGATAAAGAAGGTATTGTCTGACGTTGGATGTGAGAGGAATGGCGTTTTATAGGAATTACTCGAGGGAGCCGGTTTCGGATGGTGTACTGGATGAGAAAGGGCCGGGACCGGATGTGGAAAAAGGTGACAGTATTGTCGGAAATGAAGATGGGAATTTAAGTGATAGGGAT…
LOC108226771	CATAATTAGAAGACCTAAACAGAAAGAGATCGAACCACAGAGAGATACACCGAGAAAGAGAACGAGAGAGAGAAAGAGATTTTGTCGCTGGCGAGAATCATCGGAGTTGGCAAGTGACGGCAATTGCAATTTCGCCTCTTTTCGATACCGTTTCGACTCGGTCGAGTTGGTCAGGTTTGTGGATTGTCGCGGAGTTGTCTTGTTTTGTTGGTTAGTGTGGTTTGTTATTGATAAAGAAGGTATTGTCTGACGTTGGATGTGAGAGGAATGGCGTTTTATAGGAATTACTCGAGGGAGCCGGTTTCGGATGGTGTACTGGATGAGAAAGGGCCGGGACCGGATGTGGAAAAAGGTGACAGTATTGTCGGAAATGAAGATGGGAATTTAAGTGATAGGGAT…
LOC108226951	AAAGCTAAAGCCCTAAACCCTGTCGTCCGGTGAATTGTCCCATGTCAATGGAGTCATTTCTAGGGTTTGCTGTACCAATCTCCGACGACGCCGTTCCATTCCCCAGCGACGATTCATTTTCCGGTTACAAGCTAGTCCCGTGGATAAGCTGGGACGACTGGCGCTTCGTCAAAGACGGTCTCTTCTCTTCGTCTCCCCATTCAATCGCTTCATCTCTCCGAAGAGTGTCTGCGTGGCGAAGCAGGGGGTGCGTTCCGGTTGTAGTTGAAGTTACGGCTTCGATTATCGAGATTCAGCAGAAAGATCCTTTCTTTCGTGATGATGTTTCCGAGAACTTGTTGCATTCGGATGAGATGTTGTCTATGTTATATAGCATGGCAATTATGAGACTTGTGAATG…
LOC108226951	AAAGCTAAAGCCCTAAACCCTGTCGTCCGGTGAATTGTCCCATGTCAATGGAGTCATTTCTAGGGTTTGCTGTACCAATCTCCGACGACGCCGTTCCATTCCCCAGCGACGATTCATTTTCCGGTTACAAGCTAGTCCCGTGGATAAGCTGGGACGACTGGCGCTTCGTCAAAGACGGTCTCTTCTCTTCGTCTCCCCATTCAATCGCTTCATCTCTCCGAAGAGTGTCTGCGTGGCGAAGCAGGGGGTGCGTTCCGGTTGTAGTTGAAGTTACGGCTTCGATTATCGAGATTCAGCAGAAAGATCCTTTCTTTCGTGATGATGTTTCCGAGAACTTGTTGCATTCGGATGAGATGTTGTCTATGTTATATAGCATGGCAATTATGAGACTTGTGAATG…
LOC108227488	TGTATGTATGTATAGAGACACTAGACAGGCGTCATTCTTGAACAAGCTCCCCCAAGCACTTACTTGCCAACATAAAGACAAAACACACACACAAGACTGAAGAAAAAAGTTGATTTGCTTTAACCCCATCAAGTTTAACCATCTTTTTAACTCACCCTTCACTTGTTTCTGCTCCATTTTTCTCCCATAGAACCTGCTTACATATATACATAATCAACCTGCTGTTGTTGCTCAACAAGTGGAGATTTTCATGTCTTCACTACTCTTTTCCCATCCACTGGGGGCTACAGTGTCATCCAGCAGAAAAATGACTAGTTATTGAGTTTCTCCCATACAACGCTTTTTTTCCTCTGGATGTATGCTACTAACAACCAGCTCCCTTTAAATTAATGCAGTAGA…
LOC108227488	TGTATGTATGTATAGAGACACTAGACAGGCGTCATTCTTGAACAAGCTCCCCCAAGCACTTACTTGCCAACATAAAGACAAAACACACACACAAGACTGAAGAAAAAAGTTGATTTGCTTTAACCCCATCAAGTTTAACCATCTTTTTAACTCACCCTTCACTTGTTTCTGCTCCATTTTTCTCCCATAGAACCTGCTTACATATATACATAATCAACCTGCTGTTGTTGCTCAACAAGTGGAGATTTTCATGTCTTCACTACTCTTTTCCCATCCACTGGGGGCTACAGTGTCATCCAGCAGAAAAATGACTAGTTATTGAGTTTCTCCCATACAACGCTTTTTTTCCTCTGGATAGATCCTACATATCATTCAACCTTGAGTGTGCATCTGATATAT…
LOC108220895	GGAGGGGTTTATACTAGTGAGAGAGAGTATAACAATTCCCAACAACTATACCTAGCTGCTAGTGACAATAATTGGAGAGAGAGGTGGTGCTTTAAAGCAAGTGAGAGTGTTTGTGTGTGTTGTGAGAAGTAGCAAAGAGGAACCCACACTCAGTTTCACTTTTTCTCTTTCGAGAGATAAAAGCTAAAGAATTTAGACAACCAACAACAAGAAGAAGCAGAGACGAGAGAGAGAGAGTGGAGAGAGATTGAGAGAGAGGGAGAGAGAAGTGTACTGCTCTACACAGACGAGAGAGAAATCAGAGAGAGTGGGAGAGAGATTGAGAGAGAGAGAAGTCTACTGCTCTACTGCTCTGTGGTGTATAATTTGCATTCAGAAACTCAAACTCAGCAGTCCCTC…
LOC108227767	ATAAAGATTTGATTACTTCTTTTTGACTTATTTGTGAAAACCAGACACACTCGTAATCCACTTATTCCGACCCTTAATTTTGCGGTAAAGGCTGAGCCAGACATGCTCCGGACATTTTGTTCCCGCGTAATCACAGTCCGTGGACGGATAGAATTTCAAACCGCACCCACCGATCACAACTGCCGGCACAACTCTCTCCGAATAACACAAACTTATGTTAAGGTCAACCAAGAAGAATGGAATTGTTGGGGCTTCGAACACAGAACTCAACACATATCATCGGCAAATAGAAGAAGACCTGTTGGTGCCCATCACTTGGTCTTGCGTGCAGCGACCACCAAGGATCCTAACTGGTTGTCGGATCAAGGGGCAAAGGAATATTTGCTGATTAAGCTGGGG…
LOC108227767	ATAAAGATTTGATTACTTCTTTTTGACTTATTTGTGAAAACCAGACACACTCGTAATCCACTTATTCCGACCCTTAATTTTGCGGTAAAGGCTGAGCCAGACATGCTCCGGACATTTTGTTCCCGCGTAATCACAGTCCGTGGACGGATAGAATTTCAAACCGCACCCACCGATCACAACTGCCGGCACAACTCTCTCCGAATAACACAAACTTATGTTAAGCTCAACCGCCAAATCAATATCCTTCTCTGTCAAATTATAATTTAGTTCATTCAACATCTTCCTCGCAACTGACAAAGGGACATTCAAACCTCCTAATCTAAAGCCAACAATGTGTCATGCTACATATAATGGCTTGAATGGTGCCCATCACTTGGTCTTGCGTGCAGCGACCACCAA…
LOC108227767	ATAAAGATTTGATTACTTCTTTTTGACTTATTTGTGAAAACCAGACACACTCGTAATCCACTTATTCCGACCCTTAATTTTGCGGTAAAGGCTGAGCCAGACATGCTCCGGACATTTTGTTCCCGCGTAATCACAGTCCGTGGACGGATAGAATTTCAAACCGCACCCACCGATCACAACTGCCGGCACAACTCTCTCCGAATAACACAAACTTATGTTAAGGTCAACCAAGAAGAATGGAATTGTTGGGGCTTCGAACACAGAACTCAACACATATCATCGGCAAATAGAAGAAGACCTGTTGGTATAACTTAACATTCACTCTCTACGCGTCGACAAGCATTTTAGAAATGTAATTGTATTTATAATAAATCCCATGAGACAAAATAGGACATCCAA…
LOC108204679	AGTCCAAAATAAGCCTGTTGCTTTTTTTTTTCTTAAACATGGGTGTAACTTCTTTAATCCGGATTTTGCTCAAAAGAAGCCCATGCTTCTTGTTCCCAAGTAGCCCAATCTTGATTAATTTTGTTCATCAAAATTTAGCGACGCAATAACTTAAAGTTATAATTTCATCTCAAAGCTGCTTTCTTTGGATTACCCACCTGAAAAAAAAACTAAGGTAGTAGAGTGACAAAGCTTGAGAAGAATGAAGCTGATACCTTTGATTTTAATGGGCTGTGGAGGGGTGGGCCTTCAATTGATTCATCACATTGTTTCTTGCAGATCCCTTCATGCCAATAAGGGAGTGCGCTTGCGAGTTGTGGGACTATGTGATAGTAAATCCTTGCTTGTTGCATCAGATGT…
LOC108204680	TAATTATAGTGGATTCCCTGTTGATGATAAAGACACTCTAACAACTAATCAGATCATTGGCCAAGGCAGAAACATAACCCAAGAAATCTCTGCCTCTCTCAAAGCACAGCAGCATAATGGTGGTTCATGCAACTCAAAGGTATGCAGTGGTGACAGGAGCCAACAAGGGGATTGGATTGGAGACGGTGAGGCAGCTAGCAGCAGTAGCAGGGGTGACTGTTGTTTTAACAGCCAGGGATGTGAAGAGAGGAACTGATGCTGTGGCTTCATTGGCTTTGCCTAATGTTGTTTTTCACCAGCTTGATGTTCAAGATTCTGACAGCATCCGCTCTCTGGTCGATTTCATCTGTGCCAAATTTGGAAGGCTTGATATTTTGGTATGGTATTTTTTTCGCGACT…
LOC108210720	AAACAAATGTTTGAGATTAATTTGATTGTTAGTGTCTAAAATAAGAAAACAGAGGGGGTGAGGGATGGAAAGTGAAGGGGGGTTGAGCGCCGGAGATTTGTCGACCATCGGAGGAATTGCCACCGTTTCACTCTTACACTCATTCATACCTACCCATTGGCTTCCCTTCTCCATTGTCGGCCGTGCCCAGAAATGGACTCTCTCTCGTACCCTCCTCGTCACACTATCACCGTGATGACCTCATTGGTGGCTCTCTCATTCTATGGTGCCAGTCAACTTAAATTTCACTGGGTGGAGCGCTATGACAAGCTTCTTGTAGGTTCAGTGCTGTGTCTAGTTGGTATCTTGACACTTTTATTTCACGACCATGAACATGATCATGGAGATATCTCACAGTTG…
LOC108204295	CTTTAATGCATTTGATTAAGCAATAAAGAAACATCTCTGTACTGGATTATTTGGACGAACTCCCCATTTCTAGTTCACTCTGCTCGGAAAAAGAAAGGCTGGCATTGCCACCCATGTGAAATCGGAAGTAATTCTTTTTAATGGCTTCTAGAGCATTATTGAGAAAGAAAAGGGATCCCTTTCGTTCCTTGGGCGGCCCGATATGCCTGATTCGGGGTTCTTCTCAGGTGTGTGATTCATGGGGTTTAAGTTCGGCTATAATCCATTCTTACGGAGATAGTGATACTAAAAATTATCGAAGTTTATCTTCTTTAGCCAAAGAGGAAATCTTGATTTTTTCAGCAAGAAGCTTTCTCAGACATGATACTTTTGCCAGTTCAACTTTGAATTCTGGGATTG…
LOC108204585	TGTACATAGATAGATACGAGATTACGAGGTAGCCCTAAAATTCAATTCAAATTTATCCTAACTGGATTTGATTTTTGGTGAATGTTTGAAGCGGGGTTTTGCCAAAAAGCGTGTGAAGAAAGGTTTTGCTTTACGGGATTCAAGAGACCAGCCCCAAGACTCTGTTTATCAATTTTGGAGCTCAATCACATCATGAATGCCCTAGTTATTGATCCACTGCAGGGAGATTTTCCAGAAGTGATAGAGGAGTATTTGGAATATGGGGTTATGAAATGTATCGCTTTTAATCGTCGGGGAACTCTTCTTGCTGCTGGATGCTCTGATGGGAGCTGTGTTATCTGGGATTTTATGACGAGAGGTGTTGCAACAGTCTTGAAAGACAATGACTGTGTTGCTGCC…
LOC108205412	TCCTGGGCCAAAGAGCGTAAAGAAGCAACGGAGCCCCAACAACACAGGGACTAGTAGTATAATAGTCCAAATCAGTTTCATCTCTCTGCATCTCATTTCTCTCTCTCTCTCTCTCTCTCGGACAAAGACCAAAATCAATCAATAGCTAGGGTTTGAAAGCTTCTTCATCAGAGATGGCAATGGCTGCTTTCAGGCGTGAAGGAAGGCGTCTCGTCGTCGCTTCACCAAATCTTCTCAGATCTTCTGCGCTCCCTTCTCAACAGGAACAAGTTTCTCTGGGAGTTCGCAGTATTTCAACTCAAATCGTTCGTAACCGGATGAAGAGTGTAAAGAATATTCAGAAAATTACAAAGGCAATGAAGATGGTTGCAGCCTCTAAGCTGCGAGCAATTCAAGTGA…
LOC108204673	CCTCGTGATTACTCTGACTCGCTCCCTCATTTCTCTATTCACACTCACAAAAACACACAGTGATTCTGAGTGGGGTTGATTTGGTGCATTCAAAAATGGCAATTAGAGCACCCAATACAGGGTTACACTTGCCCTCAACTTCATTTAACACACCCAATACTCACACTAGTAGATTCTTCATTGTTAAAGCTCAACCCCCATCTAACTCGGCCTTTTTTGGCACTTCAGTGGGAGCACAAAAGTTTTCTGGGATACGCTTAGTCAAGTCCAGTCGATGGCAATCTAGTGGTTTTAGTGCTAATGCTCTTGGTACTCGTATGAACCTTTTTGAGCGCTTTGCCAGGGTTATCAAGTCCTATGCAAATGCAATTGTAAGCGCTTTTGAAGACCCGGAGAAGA…
LOC108210011	TGTCAATTGAAAATTTGTTTAGTTTTGTGGAGACCATGATATGTGCGTGCCATTTACTGGCAGCAAAGCATGGACCAGTTCACTTGGATACAAGGTTGTAGATGGATGGAGGCCATGGATATCTAAAGGACAAGTCGCAGGGTACACAGAAGGATACGCAAACAATTTCACTTTTCTAACTGTAAAGGGGTCAGGACACACTGTGCCGGAGTATAAACCACAAGAGGCCTTGGACTTCTACAGCCGTTGGTTGGCGGGTAAACGAGTCTAACGATAGTGCTCAGTTACATCACATTCTTCATTCTTGTCAAATTTATGTAATCCAAAATCTTGGAAAATTCCAAAAAGAAAAAATGGAAAAGAGAAAAGGAAACAATAATGGAATCAAGAATCATTTTC…
LOC108204265	AAACTGCCAAAATCGAAACCCAAAACATACCTCTTCTCGTATTGATCGCTTGTAATTGTACTCCTCACTAAGCATATCCAGCATGCCTATATCAAATCGAAGATGAAGAAGAAGATAGAATTACTAGATTGATGATCAATTACCTAGTGATGATGTAGCTTGTAAGCTTTTCTAACCTTTTTAGTAACATTTTTTTAGAATTATTATAAATTGTTGCCTTAATTACTCCATTTACACCTTGATCATATAGTCTCTGCAAATTGTTGTGGTTGCTAATCGGAAAAAGGCTCGTTGAATCCCTGAGTATTCATTTGAATTCCACACAACGTTTACTGACTTTTTGCTGATTAGTTCTCTTCGTATTTGTTATCAATCATATATTGTGATTTATTTTGATGT…
LOC108204265	CAAAATCGAAACCCAAAACATACCTCTTCTCGTATTGATCGCTTGTAATTGTACTCCTCACTAAGCATATCCAGCATGCCTATATCAAATCGAAGATGAAGAAGAAGATAGAATTACTAGATTGATGATCAATTACCTAGTGATGATGTAGCTTTGCAAGTTGCCCATTATAGTATGGAAATTTCCAGCTTTGAAAAGTCTAACGCTTCATGATGTGGTGTTTCATCGAGATATGAGTCACATGTTCGCTGCACTTGTCACTCTGCAAGATCTCACATTAGTTTTTGAAAAGGAGCATATACAAGATTGTGTTATACCCTCTCCTCAACTAGAGAATCTGGAGATCAGGTCCCGCTACGTATCCTACACTCACAGGATTGTGGGTAACATTGTGGTTGT…
LOC108203351	TTTATTTTCCCGTATATTTAATTAATGTGCAAGTGGGTATTTTAAATTGATACTAGGGGGAGCTGTATTGGGTTTTTTCTTGCTTAAAGACTTGAAAAGATTGAAACTTTAGTTTGAAATTACTAATCTTGGAAGCTAATGTGTGTGAAAGTGCTTAAGCTGCTTTTTGCTCACAAGATTGCTGGAGATATCTCCAAGAATATAGATTGATATCTGAAGAAGTTAGTTGAAGATAGTAATCAACTAGATAAAAAGACAGCTGATGTAAGCAAGAGGGTATTTGGATTTGAGGAGATTTAAGTTTTTGAGGTTTTTGCCATATGGGGTATGTTGGATATTGAAGGATTGGGTATGTCAGATCTTGATATGGCAGATCAAGTTGGTTGATCTTATGTTCTG…
LOC108204770	AGTAATTAATTAGACGTGTTTGAAAATGACATAAAAGCAAGTCGGATCAAATACACGCCTCAAAACGCGTGATAAAATATCTTTGTTCATAAATACACACATCTCTCTGTCTTTTATAATTCCATACATTTTCTCTTGCATTTGACGTTTCTCCGTTCAAAGTATTACAAATTTGCTTTTCCTATAAACAAGGATGGGAGGAGGCGATGGACACAATGATCAAGATAAGGGGTTGTTTTCAAATCTTGCTGGTGGTCTCGCTGGCGGTGGTCATTATCCTCCAGGACAGTACCCACCAGCGGCTGGAGGGTATCCTCCTCAAGGCTATCCCCCTGCTGGACACCACTCAGGTTCATCTGCTCCACACCACTCAGGGCATGGTGGAGTAGCTGGGATGGT…
LOC108205213	TAGTATAGTTGATTGGAGATTGAAGGATGTCTGTTAATGGAGGAGGAGGAGGTGAGATATGGAAGGCGCATACAGCGTTGGCGTTAGTACAGCTATTCAACGGTGGATATCATGTGATTACAAAAGTAGCCCTTAATGTTGGTGTTAATCAGCTTGTGTTTTGTCTTGTTCGTGATCTCATTGCTCTTTCCATTCTTGCTCCTGTTGCTTTTTTTCGAGAAAAAAGAATCAGACCACCTATGACTAGGCACTTCCTCTTGTCATTTCTCTTTCTTGGTTTTTCTGGGATATTTTTGAACCAGCTTTTGTTTCTTATTGGACTTGGCTACACGAATCCAACCTATGCTGCAGCCATACAGCCTGCAATTCCTGTCTTTACATTTATATTCGCTGCTATCA…
LOC108205213	TAGAAAATAAGAAGATGTGGATCAGATCAAAGTGGGTCAAGTACACGTACATACAAACACAAGTACATACGACATATTTGTGTTTCTCAAGTGGACCCCCTCCATGTTCTGTTCATTACAAGAAGCAAATTGATGCGTCTGTAATCTGTATGTATATATGTATGTATAGCATATAGTATAGTTGATTGGAGATTGAAGGATGTCTGTTAATGGAGGAGGAGGAGGTGAGATATGGAAGGCGCATACAGCGTTGGCGTTAGTACAGCTATTCAACGGTGGATATCATGTGATTACAAAAGTAGCCCTTAATGTTGGTGTTAATCAGCTTGTGTTTTGTCTTGTTCGTGATCTCATTGCTCTTTCCATTCTTGCTCCTGTTGCTTTTTTTCGAGAAAAAAG…
LOC108213868	TCAATGGTTCTGGACAATGAGATTTTGGAGGTGAAAAGCAATGGCTTGGCAGAATATCATTCTATTCCTGTTGGAGAAGTTTGTTATAGATGTGCTCCTGGGGGAGGGCTTGGAGAGGCTGCGAAAAATGGTGCTATGGTTTCAATCCCATGTGGTGTTTGTCCCCGTATCAATATCTGCACACCTGACGGGGTCATCTCCCCTACTACTTGTGTCTACTACACAAAGTGGTTAGATTTCTGATAGATGCATGTCTCGTAATTTTATTATCAGATTTACTAATATCAAGAGAAGTGCAAATTACAATAGATTTTTGTTGTTGAGATTTTTCTTTTCCTTCCATGTGACAAATGTATACTATTATTTTGTATTTCTTGTGTGGTAGAAGTTTCATTCAAT…
LOC108204390	ACCTGACGTTGTTGCATGGACCACGGCTGAGACCCAAACGGAGAAACCTGAAATTGAGGTCCTTGAGCAGGAGCTGAAAATGCTGAGGAGCCTAAAGGGGGTGGTGGCACGCCTTGAGAATGTGATGCGAAAGATGGTGCCAGTGGTGCAGGACCAGGTAAGGGACTAGCAGCTAGACCTCCACTAAAAGGGCGCATTCCTGCAGAGGGCGGCATTGATGGTAGAGAAGGTGGCCCACTTACTGGCCGCTGCATTCCCACAGGAGAAGGAAAGCGAGGTCCACCTTGTACACCCCCTGAAGGTGGTCCATTACTAAATGGACCTGGGGCACCAGTAGATGGTGGCGGAACTTGACCTGAATTCATTGGTGCAGACTGAAAGGGACCGGGGCGAGTACCA…
LOC108204390	AATAACCTGTGGTTGTAAACTAGTCGTGGATTTTGGTGAAAGTGGTCCTGTCCGGTGTTCTCGTTGCAAAGGCTACATAAATCCTTTCATGAGGTTCATTGACCAGGGAAGACGTTTCATTTGCAACTTATGTGGATATACTGATGAAACCCCCCGAGAGTATCATTGCAATCTAGGCCCGGATGGTAGGCGCAGAGATGCCGATGAAAGGCCTGAGCTGTGTAAAGGAACAGTAGAATTTGTTGCCACCAAAGAATATATGGTGCGCGATCCAATGCCTGCAGTATTTTTCTTTCTCGTTGATGTGTCAATGAACTCACTACAGACTGGTGCAACAGCAGCTGCATGTAGTGCAATCAGCCAAGTTATTGCTGATCTGCCAGAGGGCCCTCGGACGAT…
LOC108209055	AAGTTGCCTTTTTTAAAACTCTCAATTCACGCGATTATCATGTGATTTGCTGTTCGGTGTAATTTTTGTCAATATATGCAGGTACATAAGCGAAAATGAGTTAATTTATGTGAATCAAATTTTCAGGAACCATTGGTTTTTAGTCCGTTGGATCAGAATTCGTATAAGCTGTTGATTTTGAAAAGACGCGCCGAGAATCGCTGTGTGAAGATTTTTAAACAGGAGCGTGTTCCAGAGACTGAGTTACAGGTCCGAGTTTTAACCGTGTGGCGTGTTCCAGAGACTGAGTCACAGACAAAGCTCGAGCCTTTCTACCTTCAATCACCTGTGAGTGGTTTGATATCAGATGGAGGTCTTGCATAAGACATCCAGAAAGTATCATCATTTTGACATATCCGA…
LOC108209055	GTTATATAACTAATAACTAGTATATATAAAAAATTAAAAAAAAAAAGTTTGTAAGTGATGTAAGCTTGTCCAGAACCCTGTCCGATCTATATATTCCCCCCCTGTATATATACATGTATTAATGCAACTATTCAGCGCTGCTTATAACTGAAATCAAAAATCAATTTCCTGTAAAAAAAATGAAAGGGACGATGATTAGCAGCTCTGCACGATACCCTCAACATGGGTCATGCTATACCATAAGTATAATGGCACTATCAGAAGGAATCATAGTGATCATATCAAACGAGTTCACCCTACATGTTTGATAAATTGTGCAAGTGAATTGGATCTTCTTCACATTGATTCAATTTGAAATGTTTCACTGTACCGTGAGAATCCTCTTCCCTTAAATCAAAT…
LOC108215294	AGCACTTTCTCCCCAGTCCCAGAATCAGGATATTGTTTAACAAATATATTTTGGTCATTTTTCGCAACAAAAATGCTCGTGATATACCGGGTCTGTTATCGTATTTTCTGATGATTCTTATTTTGTACATACACAATCACTACAGCTATTTGATTTTCAAGAAAAGCCCGTGGTATGGTTCCCAAGCTTGTTTCAATGGCAAATTTCAGACCTGGCAAACGAGGCTTGGTCTTTTACAGCATCAGAGCCACCAATAAATTTATACCAGAAAGCGGAAAAGGGGAGCAGATATTTGCCAAATCAGGGGAACCGGCGAAATTGTTAGGGCTGGAGATTCCGTGTTCATGGAATCATCTGAAACTGATAAACAGATCTATGTTGCTCGTGTCGAAAGATTCG…
LOC108215294	AGCACTTTCTCCCCAGTCCCAGAATCAGGATATTGTTTAACAAATATATTTTGGTCATTTTTCGCAACAAAAATGCTCGTGATATACCGGGTCTGTTATCGTATTTTCTGATGATTCTTATTTTGTACATACACAATCACTACAGCTATTTGATTTTCAAGAAAAGCCCGTGGTATGGTTCCCAAGCTTGTTTCAATGGCAAATTTCAGACCTGGCAAACGAGGCTTGGTCTTTTACAGCATCAGAGCCACCAATAAATTTCTGGAGATTCCGTGTTCATGGAATCATCTGAAACTGATAAACAGATCTATGTTGCTCGTGTCGAAAGATTCGAAACTGATAGCGAAGGCAAGTTTATGGTTAAAGTGAGATGGTACTATAGCCCAGAGCAGGCTGGTG…
LOC108204508	ATTTAAAAAAAAAAAAAAGAATAAGCTCAAATAATCAGAGAATTCTGAATTTCTTTTACCTATATTAAGAAATTTTAACTAGCAAACATGACACAGTATTAGTCTACTCTGTTTTGCTTACTTCCCTCCAAACGAAAGATTCATCATTTATTTATTACAGTTAGTTGTCAGTTGACAACAATAGTATCTCATGGAGAAGAAGCAGCAGAACTTCAGATCGCAGAATCCCTCCCCTCCGCCATACGAGTCATCCATATCCTCTTTTTCTCCGTCATCCTTTAGTCGCGACGGAGAAGGACCTGAACACAGTTTACATCCCTCGCCAGCTCCACAAAAAGAAATCAGTCGAAAGCAGTCGACAAAAAGAACCGGTGATGATCAGGTGCTTAAGAAGGTGAA…
LOC108204506	CAGAAATTCCTTGCAATGATGACATTTTCCTGCTCATTCATTCAACATCTTGTTCTCCTGTGCAGAAACCGTTTACCATATCATCTATTGATCGTTCTTCTTCTGCCGACGAAGAGGACATTGATCGAGGTGTATATCTGATGGAAAAAGTGAATGATCCAGCACTATCATATGAGCCCTCCCCGGCACGTGGACTGAATAAGTTGCCTGAATTATATCGTGGTCTTCCACTTGCTGGTGGCAAAATCAAATCAGAGGTTCTTGATCCTAAATTTTCTAGTCTTCAACCTGGTGACTTTAGCAAGACAACTAGAGACTTGAGTCAAAGTAGATCTGTGGCAACTAGTGTCACCTTTGCAGATGGAGTGATTGAGGAAGATGTTAAAGTTGAACCACTGG…
LOC108205177	AATGACAGTTAGCATTCACAAGACGACCTTCTTGATATACATACAAAATACAGTCAGAATCACCGAGTCTCTCTGAAGTTGAAATGGCCAACCCACTTCCCGGATCCGACCCGGTTGCGGGATCCAATAAAAGTCCGGGTTGGTTGCCTGCTGGTTGGACAGTCACCTACAAGACTCGGACCAGTGGTGCTACCGCAGGAACTGTTGATAAGTATTACGTAGAGCCAACAACAGGTGCACGATTTCGGTCAAAGGTTGAGGTGGAACGTTATCTAGAAACAGGAAGTAAGAATAAATTACCCTCTGATACAAATGCGACGCCATCGGGGACATTGAACAAAAACAATGAAAAATCAGGTACCAAGAAGACAGGAACGAAGAGGAAGAAGGAAGCTGTGT…
LOC108205178	AGAACGAATCAAGGTCGGTTATTACAATTAAAAATAATTACGTTATCAATTTGATTCGAATGATTCGTCCACGTCATCGTTCCAAGAAAAGACACGGTTATAATATATGTAAAGAAAGCGGGATAATATATTGAAAGCAATCCTTTGACAGCTGCAGCAAGCGAAGAACTGAAGAAGAGAGCTGGATTCATCATTCTGTTAATAATTTTAACTGTAAATTTTAACCAACATGGCGAATTCGAAGCTCCAGGCTCTCTGGAATCACCCTGCTGGCCCCAAAACCAGTTAGTTTCAGTCATCATGCTTTTTCTAATATCTTTTTTTACTATTCACTTCTGGGCACCAACATTTAAGTGGGGGATCAGCATAGCTAATGTTGCTGACTTTGCTATCCCACCT…
LOC108205178	AGAACGAATCAAGGTCGGTTATTACAATTAAAAATAATTACGTTATCAATTTGATTCGAATGATTCGTCCACGTCATCGTTCCAAGAAAAGACACGGTTATAATATATGTAAAGAAAGCGGGATAATATATTGAAAGCAATCCTTTGACAGCTGCAGCAAGCGAAGAACTGAAGAAGAGAGCTGGATTCATCATTCTGTTAATAATTTTAACTGTAAATTTTAACCAACATGGCGAATTCGAAGCTCCAGGCTCTCTGGAATCACCCTGCTGGCCCCAAAACCATTCACTTTTGGGCACCAACGTTTAAGTGGGGGATCAGTATAGCTAATGTTGCCGACTTTGCTAAACCTCCTGAGAAGCTTTCGTATCCCCAGCAAATAGCGGTCACAGCTACTGG…
LOC108205178	AGAACGAATCAAGGTCGGTTATTACAATTAAAAATAATTACGTTATCAATTTGATTCGAATGATTCGTCCACGTCATCGTTCCAAGAAAAGACACGGTTATAATATATGTAAAGAAAGCGGGATAATATATTGAAAGCAATCCTTTGACAGCTGCAGCAAGCGAAGAACTGAAGAAGAGAGCTGGATTCATCATTCTGTTAATAATTTTAACTGTAAATTTTAACCAACATGGCGAATTCGAAGCTCCAGGCTCTCTGGAATCACCCTGCTGGCCCCAAAACCATTCACTTCTGGGCACCAACATTTAAGTGGGGGATCAGCATAGCTAATGTTGCTGACTTTGCTATCCCACCTGAGAAGCTTTCGTATCCCCAGCAAATAGCGGTCACAGCTACTGG…
LOC108215436	GGATAATATAAACAAGTAGGCCTTGGCCTTGCCTTGCTTTGTATATATTGGTGAGACGTGAGAGTTTAACAAAGAGAACAGAGCTGTACACATACACGTACTTGTGAATAATTTTCACAGATTTTAACTAGAATGGCGAGTTCGAAGCTCCAAGCTCTATGGAATCACCCTGCTGGCCCAAAAACCATTCACTTTTGGGCACCAACGTTTAAGTGGGGGATCAGTATAGCTAATGTTGCCGACTTTGCTAAACCTCCTGAGAAGCTTTCGTATCCCCAGCAAATAGCGGTCACAGCTACTGGAGTTATCTGGTCACGTTACAGTGTTGTTATCACGCCGAAGAACTGGAACCTTTTTAGTGTAAATGTTGCAATGGCAGGAACAGGCATTTATCAACTT…
LOC108227727	CGATCGTACACATGATATATCTAATATCCATAATTTACCAGATTTAAAAACCCCAGAGATGGGCAGTTCTCTTTCTCTTTGAAGAAAGTTATTGGATCAGACTTGATTGATTGAATTGGAAGATGGGTTTCTCTGTCACGACCCTCATCTTTGCTTTGGTGGGCCTAGTTGCTAGTCTTTCTACCAGAATCTGCTATAACAAAGGCCCTTCTGCTAATCTGCTCCACTTGACATTGGTAATGACTGCAACAGTTTGCTGCTGGATGATGTGGGCGATTGTCTACCTTGCACAGATGAATCCACTAATTGTTCCAATCCTGAGCGAAGGGGAGTGAGATGGCCGCGTCTTTATGAATTACTAGCATTTTGCCAATGGATTGGTTGCTTCTGAATATATGT…
LOC108208796	CGTGGGTTCGAATCCCACAGCTGACATTTTTTTTCCCCCTCCCTCCAAAATTTCAAGACCTAATTTGGGTACAAATAGAGAAGATAAAATTTTGAATTTTGAGCTATGAAATCAACAATCACGAGCTTCCCAAAACCCAAATCATACATGTATTTTTTCAGCTTGAAACATCCCAGAAATCCTTTGATTTTTTATGCTAAATCAACCCTTTTCAACAGGCTTCACACTCACCCTTCTTTCTCTCCCGGAGAGATTGTGGGGCCCATGTTCTCCGGCAAGACCACCACCACTGTCTCGCCAAGACTCCCTCCTCTCACCAGGATGAGGCCAACAAACACTTCATGTATTTGGACAAAACGTTGAAAGGTTTGATATACTCGGGAAGGCTGGTACATGCAA…
LOC108208796	CGTGGGTTCGAATCCCACAGCTGACATTTTTTTTCCCCCTCCCTCCAAAATTTCAAGACCTAATTTGGGTACAAATAGAGAAGATAAAATTTTGAATTTTGAGCTATGAAATCAACAATCACGAGCTTCCCAAAACCCAAATCATACATGTATTTTTTCAGCTTGAAACATCCCAGAAATCCTTTGATTTTTTATGCTAAATCAACCCTTTTCAACAGGCTTCACACTCACCCTTCTTTCTCTCCCGGAGAGATTGTGGGGCCCATGTTCTCCGGCAAGACCACCACCACTGTCTCGCCAAGACTCCCTCCTCTCACCAGGATGAGGCCAACAAACACTTCATGTATTTGGACAAAACGTTGAAAGGTTTGATATACTCGGGAAGGCTGGTACATGCAA…
LOC108208796	CGTGGGTTCGAATCCCACAGCTGACATTTTTTTTCCCCCTCCCTCCAAAATTTCAAGACCTAATTTGGGTACAAATAGAGAAGATAAAATTTTGAATTTTGAGCTATGAAATCAACAATCACGAGCTTCCCAAAACCCAAATCATACATGTATTTTTTCAGCTTGAAACATCCCAGAAATCCTTTGATTTTTTATGCTAAATCAACCCTTTTCAACAGGCTTCACACTCACCCTTCTTTCTCTCCCGGAGAGATTGTGGGGCCCATGTTCTCCGGCAAGACCACCACCACTGTCTCGCCAAGACTCCCTCCTCTCACCAGGATGAGGCCAACAAACACTTCATGTATTTGGACAAAACGTTGAAAGGTTTGATATACTCGGGAAGGCTGGTACATGCAA…
LOC108208796	CGTGGGTTCGAATCCCACAGCTGACATTTTTTTTCCCCCTCCCTCCAAAATTTCAAGACCTAATTTGGGTACAAATAGAGAAGATAAAATTTTGAATTTTGAGCTATGAAATCAACAATCACGAGCTTCCCAAAACCCAAATCATACATGTATTTTTTCAGCTTGAAACATCCCAGAAATCCTTTGATTTTTTATGCTAAATCAACCCTTTTCAACAGGCTTCACACTCACCCTTCTTTCTCTCCCGGAGAGATTGTGGGGCCCATGTTCTCCGGCAAGACCACCACCACTGTCTCGCCAAGACTCCCTCCTCTCACCAGGATGAGGCCAACAAACACTTCATGTATTTGGACAAAACGTTGAAAGGTTTGATATACTCGGGAAGGCTGGTACATGCAA…
LOC108208796	CGTGGGTTCGAATCCCACAGCTGACATTTTTTTTCCCCCTCCCTCCAAAATTTCAAGACCTAATTTGGGTACAAATAGAGAAGATAAAATTTTGAATTTTGAGCTATGAAATCAACAATCACGAGCTTCCCAAAACCCAAATCATACATGTATTTTTTCAGCTTGAAACATCCCAGAAATCCTTTGATTTTTTATGCTAAATCAACCCTTTTCAACAGGCTTCACACTCACCCTTCTTTCTCTCCCGGAGAGATTGTGGGGCCCATGTTCTCCGGCAAGACCACCACCACTGTCTCGCCAAGACTCCCTCCTCTCACCAGGATGAGGCCAACAAACACTTCATGTATTTGGACAAAACGTTGAAAGGTTTGATATACTCGGGAAGGCTGGTACATGCAA…
LOC108208796	CGTGGGTTCGAATCCCACAGCTGACATTTTTTTTCCCCCTCCCTCCAAAATTTCAAGACCTAATTTGGGTACAAATAGAGAAGATAAAATTTTGAATTTTGAGCTATGAAATCAACAATCACGAGCTTCCCAAAACCCAAATCATACATGTATTTTTTCAGCTTGAAACATCCCAGAAATCCTTTGATTTTTTATGCTAAATCAACCCTTTTCAACAGGCTTCACACTCACCCTTCTTTCTCTCCCGGAGAGATTGTGGGGCCCATGTTCTCCGGCAAGACCACCACCACTGTCTCGCCAAGACTCCCTCCTCTCACCAGATGTTCGCAGGATGAGGCCAACAAACACTTCATGTATTTGGACAAAACGTTGAAAGGTTTGATATACTCGGGAAGGCTG…
LOC108208796	CGTGGGTTCGAATCCCACAGCTGACATTTTTTTTCCCCCTCCCTCCAAAATTTCAAGACCTAATTTGGGTACAAATAGAGAAGATAAAATTTTGAATTTTGAGCTATGAAATCAACAATCACGAGCTTCCCAAAACCCAAATCATACATGTATTTTTTCAGCTTGAAACATCCCAGAAATCCTTTGATTTTTTATGCTAAATCAACCCTTTTCAACAGGCTTCACACTCACCCTTCTTTCTCTCCCGGAGAGATTGTGGGGCCCATGTTCTCCGGCAAGACCACCACCACTGTCTCGCCAAGACTCCCTCCTCTCACCAGGATGAGGCCAACAAACACTTCATGTATTTGGACAAAACGTTGAAAGGTTTGATATACTCGGGAAGGCTGGTACATGCAA…
LOC108193248	TCAAGAATGTTATCCCCAAATACTGAAAATATGTTTCAAATATTAAACGGGATCTTCGTGAGGAACGCCGATACATTCAACCCTGAGAACACTCATCTCCCGCAATCATCTTCTCCAAATCTCTGCTTATCCTCAAAACCACTTTAGATGTTACCCTAACATAGCTAGTAAAATGTTTTCACGGGTCACTGATGAGGTCTCGTATGCCCGCCACCTGTTTGACACAAGTCCCCAACCAGATACTTTAGATACTGATGATTAGAGGTTTTGGGTCTGATTTGTTTGTTCATACGGCGTTGATTGAAATGTACGGGAGATACTCTGGGCTCGTAATTGTAAACCCCAGATGTGAATCGGCAAAGCATTTACAGAAACTCATGGAGAGTAGGTACTAGTACT…
LOC108193176	ATGATGAGAGGCAACGTGAGCTATCTCTGTCGGAAGGTCATCATCCAGACTTTTTGCATCACAGATTTTAAAGATTAGTTTTGTAATTGTTAGAAAGCTTTGAATCATGTCTTCCAGATATTTCTTTGGTTTCCGCTTTTTTTTCGTGGTTGTGTAATTATATGTTTTTGTGGTCACTAATATTTAGTTGATGAGTTTGTTTAGTATCTTTA
LOC108202756	GAATGTTATCCCCAAATAAGGAAAATATGTTTCAAATATTAAACAGGATCTTCGTGAAGAACGCCGATACAGGGATTCAACCGTGAGAACACTCGTCTAACCTCAATCATCTTCTCCAAATCCCTGCTTATCTTCAAAACCGCTTTAGATATCAACGTTGTTGCCCTAACCTAGCTATTACGTAAGATGTTTTCACGGGTCACCGATGAGATCTCGTATGCGCGCCACCTGTTTGACAGAAGTCCCCAACCAGATACTTTAGATACTGATGATTAGAGGTTTTGGGTCTGATTTGTTTGTTCAGACGGCGTTGATTGAAAATGGGAGATACTCTGGACTTGTAATTGTAAACCCCAGATGTGAATCGGCAAAGCATTTACAGAAACTCAGGGAGAGTAG…
LOC108204401	CACATGACAGTACTATAATGGCTACCAAACTTATTATGGCGTACTTGAGCTTAGCAGCAATTGCATCGGCCTTACAAGGTGCGTTGTTCGCGAAACTAGGAGAGCCTACATTGCAATGGATGAAGGTATGCACCATGTATGGCAAATTCTGTAACCAAGTCGGGGAAGGATTAGCTAGCGCTGTAATTGCGAGTCTTGCCATGGTGATCCTTTCCGCGATTTCAGCTTTTAGTCTGTTTCGATTGTATGGGGGGAACAAGGACAAGAACACTGCAAGGTGGTAGACTTGCTGCTGTTCTTAAAGTGACTAATGTGAAGAAAATGTACTAGTGTCCTAATTTCTACCAGAGTATGACACTAAATATGTGTACCTTAATCATTTGTCATAGGTGGACAAAA…
LOC108204279	GCTATCTTAAAATAGTTGAACTTTATGTTATTATACACTTAAGTACAGGTACATGAATATTAGAAACTTCAACATAATCAAAATTGAAGATATGTTGCTTGATCTCATTGTCAACAACCAAATGGTCACTAACCTTATTATAATCATTCTTTCTACATACTAATGAACTTGTTTTCTTTACCACTAAAAAAACCCATATACCTTCACCAAAACAGATGGTAAGAACTTTCAAGGAAAAGTTACTTGGAGAAGTAGTACCAGGGGCCATGAAGCTGACATCCCACCACTCTTACATGATTGTGCACCCTTGTGGATTTTCTTCACTGAAGTAATCAGTGTTCACACAACATTTGCTCCCGCGGTACCCATATCCATAATCGTAACATGGAGCTGGAGGAG…
LOC108204279	ATGCAGCAAGGAGATGCTATTTAATAGTTGTAAATGAAGATTCTGCTATCTTAAAATAGTTGAACTTTATGTTATTATACACTTAAGTACAGGTACATGAATATTAGAAACTTCAACATAATCAAAATTGAAGATATGTTGCTTGATCTCATTGTCAACAACCAAATGGTCACTAACCTTATTATAATCATTCTTTCTACATACTAATGAACTTGTTTTCTTTACCACTAAAAAAACCCATATACCTTCACCAAAACAGATGGTAAGAACTTTCAAGGAAAAGTTACTTGGAGAAGTAGTACCAGGGGCCATGAAGCTGACATCCCACCACTCTTACATGATTGTGCACCCTTGTGGATTTTCTTCACTGAAGTAATCAGTGTTCACACAACATTTGCT…
LOC108205084	ATTCTTAAGAATCATCTATTATGCTACACTTAATATTGAAATTGAAAAAATTAATAAAATGTTACATTTGCAACAAATTTAAAGTTTTGTATAGGAAATGAACAGGCAGTAAAATCAGTATGAATAAGAAGTGAATAAACATAAGAAAAAGGAGTCGGTGATGGAGGCATTTGTGAGCAGAAAGAAGTTGAAAACAACACAACAAGAAGATGATGAAAAAGAAGAAGAGGCTCATAAAAGAAAAGGGGAGGTCTTAGTGAATCTGGGAAATGAAAGCCAAGTGTTATATATACCCAAGCTCTTTTCCTTTCAAGATTCTTCTCGTTATCTCAAGTTTCTCAACAATCAAATTCCCTGGACCCGTCCCACCATTCGGGTCTTTGGCCGTTCTGTTCTGCA…
LOC108204560	TCATCTGATAATAAAGAGAAAACTGAGGTTCCTCTTTCTCATCCGCCTCTCGCTATCATCCCCGTGCGTGCATCTTTGATTCATATCGAGATGACTTACATATATGTCAATATATTCTAAGCTCTTTTTATCATCATCTTCTTCTTTAAAGGACTAAATTGGTTAATTTTTAGTGGAGGATGACTGCGTATGTCGGGAATTGTAGCATTCTTGCTTAATTGCTTTGCTGGAGATAGTTGTGTGAGTTTGGGTTGTAATTGTGCACCCTAGGTGAGTTGGTAGTGGACTTTGATTTACGTGTTGAGGGAGATAGAAGATGTATGGAAGGTCGGGTCTTGATCGTTTTAAAAAGGCGCAGACTTTAGAACCATTTTCGGTTGCTACGGGTTCGACTGCCAA…
LOC108205480	ATCTTTTATGTGTTCCCATGTTTTAAACTACTTAAAGCCTTTACATGTTGTATTGTACTTCACCCTTCTCTTTCCCATTTCAATTCTGCTGTCACTTGTAAATTCTGTCTGAATCATTTTTTGTAATACAAGAATTCATGGGTTTCTGCAAGAGTGCTTGTGGTTTATTAATTGTATCAGTAATAATGATAATGTGTAGCAAGGTTGCAGAATCAACTGGGATAGGAGTGAACTGGGGAACCATTTCTTCCCACAGATTATCACCCACCACTGTTGTAGATCTTCTCAAAGACAACAATATTAAGAAGGTGAAGTTGTTTGATGCAGACCCAGGTTCACTTAGAGCTCTTATGGGTAGTGGTATTGAGGTTATTATTGGGATTCCCAATGAGCTTTTGG…
LOC108205480	ATTTATTTACAATCTTACCAGCCAGAGAAGGGAATCTCGGGTCCACATTTTGAGGTCGAGCACTTGTTTCTGCACTTGCATAAGCACACATCATGAAAGACGCGGCGACAAGGAGCCATATCAGAGCAATCGACAAGGTCTTGTTCTGAAACACCATCTCTGTGTTTGTTTTGTTATTCCTGACTGAGAACTTATAGATGTGCAGAGTATATGACTTGATGCTGTTACACTTCCATCTCGCGCTCTATTTATACAAAAATTCGGACAATAATTTCAAAGCAAGATAGAAA
LOC108205486	TTGTTTCTGGAAATGATGTTAGAATCTCCTTTACTGAAGTATCCTGTATGAATGTAATCAACTTGCATTTTGTAGACAAAGATCTGCCTAACATGACAACAGACTAGGAAGTCGGTCAACAGATAAGGCTTCATGGATTTGGATGAGAGTAAGCAGTATCAGTTGACTACTGAGCATGCCGATAGGAAATTTCTATCTTGCTTTGAAATTATTGTCCGAATTTTTGTATAAATAGAGCGCGAGATGGAAGTGTAACAGCATCAAGTCATATACTCTGCACATCTATAAGTTCTCAGTCAGGAATAACAAAACAAACACAGAGATGGTGTTTCAGAACAAGACCTTGTCGATTTCTCTGATATGGCTCATTGTCGCCGCGTCTTTCATGATGTGTGCTTA…
LOC108204374	GGACCATCCATTACAAAACGGGAAGATCCGGTGCATATTATACCCGGTGCATTCTGCAGCGTTTTCGTGCAAGATTTACAGGAAGATCCGAACTTGGTCGGGCGATCCATTCAGTTTCTCTCGAATTTGTTTTTCAGTAGTGACACCCCTTGATTTCAGCAGCCAGTTACGACGTGAATTTCAAAATTCGCATACCTGCATCTGAAGGGAAGGTATCAGTGAGATCCTGGAAGATAATGAAGTGATGCAATGGAAAAGAAATGCAAATAAGCTAATTTGATAGAGACGAATTAGCAGGCAGTCGTGAACATGCATCCGGTAATGCGTTGGATTCATTTCTCCAAAGACGGCTGGAAAACATTAAGAAATCCAAGAACATTAGTACTTCCTCTGCCTTTG…
LOC108204374	GGACCATCCATTACAAAACGGGAAGATCCGGTGCATATTATACCCGGTGCATTCTGCAGCGTTTTCGTGCAAGATTTACAGGAAGATCCGAACTTGGTCGGGCGATCCATTCAGTTTCTCTCGAATTTGTTTTTCAGTAGTGACACCCCTTGATTTCAGCAGCCAGTTACGACGTGAATTTCAAAATTCGCATACCTGTGATCCCACTTCCTTCTGATACCTCGCTTTCTTCTTATTGATCATGGATAATGATCTGATTTCATCTTCACTACTTACGTTTCATTGCATCTGAAGGGAAGGTATCAGTGAGATCCTGGAAGATAATGAAGTGATGCAATGGAAAAGAAATGCAAATAAGGCAGTCGTGAACATGCATCCGGTAATGCGTTGGATTCATTT…
LOC108204374	AACCTGGACCATCCATTACAAAACGGGAAGATCCGGTGCATATTATACCCGGTGCATTCTGCAGCGTTTTCGTGCAAGATTTACAGGAAGATCCGAACTTGGTCGGGCGATCCATTCAGTTTCTCTCGAATTTGTTTTTCAGTAGTGACACCCCTTGATTTCAGCAGCCAGTTACGACGTGAATTTCAAAATTCGCATACCTGTGATCCCACTTCCTTCTGATACCTCGCTTTCTTCTTATTGATCATGGATAATGATCTGATTTCATCTTCACTACTTACGTTTCATTGCATCTGAAGGGAAGGTATCAGTGAGATCCTGGAAGATAATGAAGTGATGCAATGGAAAAGAAATGCAAATAAGCTAATTTGATAGAGACGAATTAGCAGGCAGTCGTGA…
LOC108204374	GGACCATCCATTACAAAACGGGAAGATCCGGTGCATATTATACCCGGTGCATTCTGCAGCGTTTTCGTGCAAGATTTACAGGAAGATCCGAACTTGGTCGGGCGATCCATTCAGTTTCTCTCGAATTTGTTTTTCAGTAGTGACACCCCTTGATTTCAGCAGCCAGTTACGACGTGAATTTCAAAATTCGCATACCTGCATCTGAAGGGAAGGTATCAGTGAGATCCTGGAAGATAATGAAGTGATGCAATGGAAAAGAAATGCAAATAAGGCAGTCGTGAACATGCATCCGGTAATGCGTTGGATTCATTTCTCCAAAGACGGCTGGAAAACATTAAGAAATCCAAGAACATTAGTACTTCCTCTGCCTTTGATGATTGCAGCTCCAAAAATACGTGC…
LOC108204374	GGACCATCCATTACAAAACGGGAAGATCCGGTGCATATTATACCCGGTGCATTCTGCAGCGTTTTCGTGCAAGATTTACAGGAAGATCCGAACTTGGTCGGGCGATCCATTCAGTTTCTCTCGAATTTGTTTTTCAGTAGTGACACCCCTTGATTTCAGCAGCCAGTTACGACGTGAATTTCAAAATTCGCATACCTGTGATCCCACTTCCTTCTGATACCTCGCTTTCTTCTTATTGATCATGGATAATGATCTGATTTCATCTTCACTACTTACGTTTCATTGCATCTGAAGGGAAGGTATCAGTGAGATCCTGGAAGATAATGAAGTGATGCAATGGAAAAGAAATGCAAATAAGGCAGTCGTGAACATGCATCCGGTAATGCGTTGGATTCATTT…
LOC108204374	AACCTGGACCATCCATTACAAAACGGGAAGATCCGGTGCATATTATACCCGGTGCATTCTGCAGCGTTTTCGTGCAAGATTTACAGGAAGATCCGAACTTGGTCGGGCGATCCATTCAGTTTCTCTCGAATTTGTTTTTCAGTAGTGACACCCCTTGATTTCAGCAGCCAGTTACGACGTGAATTTCAAAATTCGCATACCTGCATCTGAAGGGAAGGTATCAGTGAGATCCTGGAAGATAATGAAGTGATGCAATGGAAAAGAAATGCAAATAAGCTAATTTGATAGAGACGAATTAGCAGGCAGTCGTGAACATGCATCCGGTAATGCGTTGGATTCATTTCTCCAAAGACGGCTGGAAAACATTAAGAAATCCAAGAACATTAGTACTTCCTCTGC…
LOC108204374	AACCTGGACCATCCATTACAAAACGGGAAGATCCGGTGCATATTATACCCGGTGCATTCTGCAGCGTTTTCGTGCAAGATTTACAGGAAGATCCGAACTTGGTCGGGCGATCCATTCAGTTTCTCTCGAATTTGTTTTTCAGTAGTGACACCCCTTGATTTCAGCAGCCAGTTACGACGTGAATTTCAAAATTCGCATACCTGCATCTGAAGGGAAGGTATCAGTGAGATCCTGGAAGATAATGAAGTGATGCAATGGAAAAGAAATGCAAATAAGGCAGTCGTGAACATGCATCCGGTAATGCGTTGGATTCATTTCTCCAAAGACGGCTGGAAAACATTAAGAAATCCAAGAACATTAGTACTTCCTCTGCCTTTGATGATTGCAGCTCCAAAAATA…
LOC108204374	GGACCATCCATTACAAAACGGGAAGATCCGGTGCATATTATACCCGGTGCATTCTGCAGCGTTTTCGTGCAAGATTTACAGGAAGATCCGAACTTGGTCGGGCGATCCATTCAGTTTCTCTCGAATTTGTTTTTCAGTAGTGACACCCCTTGATTTCAGCAGCCAGTTACGACGTGAATTTCAAAATTCGCATACCTGTGATCCCACTTCCTTCTGATACCTCGCTTTCTTCTTATTGATCATGGATAATGATCTGATTTCATCTTCACTACTTACGTTTCATTGCATCTGAAGGGAAGGTATCAGTGAGATCCTGGAAGATAATGAAGTGATGCAATGGAAAAGAAATGCAAATAAGGCAGTCGTGAACATGCATCCGGTAATGCGTTGGATTCATTT…
LOC108204374	AACCTGGACCATCCATTACAAAACGGGAAGATCCGGTGCATATTATACCCGGTGCATTCTGCAGCGTTTTCGTGCAAGATTTACAGGAAGATCCGAACTTGGTCGGGCGATCCATTCAGTTTCTCTCGAATTTGTTTTTCAGTAGTGACACCCCTTGATTTCAGCAGCCAGTTACGACGTGAATTTCAAAATTCGCATACCTGCATCTGAAGGGAAGGTATCAGTGAGATCCTGGAAGATAATGAAGTGATGCAATGGAAAAGAAATGCAAATAAGCTAATTTGATAGAGACGAATTAGCAGGCAGTCGTGAACATGCATCCGGTAATGCGTTGGATTCATTTCTCCAAAGACGGCTGGAAAACATTAAGAAATCCAAGAACATTAGTACTTCCTCTGC…
LOC108204374	AACCTGGACCATCCATTACAAAACGGGAAGATCCGGTGCATATTATACCCGGTGCATTCTGCAGCGTTTTCGTGCAAGATTTACAGGAAGATCCGAACTTGGTCGGGCGATCCATTCAGTTTCTCTCGAATTTGTTTTTCAGTAGTGACACCCCTTGATTTCAGCAGCCAGTTACGACGTGAATTTCAAAATTCGCATACCTGCATCTGAAGGGAAGGTATCAGTGAGATCCTGGAAGATAATGAAGTGATGCAATGGAAAAGAAATGCAAATAAGGCAGTCGTGAACATGCATCCGGTAATGCGTTGGATTCATTTCTCCAAAGACGGCTGGAAAACATTAAGAAATCCAAGAACATTAGTACTTCCTCTGCCTTTGATGATTGCAGCTCCAAAAATA…
LOC108204374	AACCTGGACCATCCATTACAAAACGGGAAGATCCGGTGCATATTATACCCGGTGCATTCTGCAGCGTTTTCGTGCAAGATTTACAGGAAGATCCGAACTTGGTCGGGCGATCCATTCAGTTTCTCTCGAATTTGTTTTTCAGTAGTGACACCCCTTGATTTCAGCAGCCAGTTACGACGTGAATTTCAAAATTCGCATACCTGCATCTGAAGGGAAGGTATCAGTGAGATCCTGGAAGATAATGAAGTGATGCAATGGAAAAGAAATGCAAATAAGCTAATTTGATAGAGACGAATTAGCAGGCAGTCGTGAACATGCATCCGGTAATGCGTTGGATTCATTTCTCCAAAGACGGCTGGAAAACATTAAGAAATCCAAGAACATTAGTACTTCCTCTGC…
LOC108204374	AACCTGGACCATCCATTACAAAACGGGAAGATCCGGTGCATATTATACCCGGTGCATTCTGCAGCGTTTTCGTGCAAGATTTACAGGAAGATCCGAACTTGGTCGGGCGATCCATTCAGTTTCTCTCGAATTTGTTTTTCAGTAGTGACACCCCTTGATTTCAGCAGCCAGTTACGACGTGAATTTCAAAATTCGCATACCTGTGATCCCACTTCCTTCTGATACCTCGCTTTCTTCTTATTGATCATGGATAATGATCTGATTTCATCTTCACTACTTACGTTTCATTGCATCTGAAGGGAAGGTATCAGTGAGATCCTGGAAGATAATGAAGTGATGCAATGGAAAAGAAATGCAAATAAGCTAATTTGATAGAGACGAATTAGCAGGCAGTCGTGA…
LOC108201398	ACTACACGTTCATAAAACTCTCTCTCTCGCTCTCTCCTTTCTCCCTCTCACTTAGGTTCCTCTCTGCGTCTCTCAACCGATATGTGGGTATGATTTACGACTTGGACTTGACTCCGTCTTCTTCATTTAGTTATACCCATTGGTATTTCTTCAGTTGACCGGTTCCGAGAGAGATTCTGTTTATACAAGTTACCGAACCACCATATTGTAATTTGTTTTATCAAGAGGAAACACTCGAATAAACATAGGAAAGCTTAAAGGTGTTTAATCAGGAAGGAAAAAAACCAGTAGAAAGATTGAGTTGGTGGAAAGAATTTGGAGAAAGGCATTTGATGAGTCAATTCAGTGCCTCCTCCAGTGGCAAAACAAGTGTGAACTTGAACTTCAAACACGAGGAAT…
LOC108201398	ACTACACGTTCATAAAACTCTCTCTCTCGCTCTCTCCTTTCTCCCTCTCACTTAGGTTCCTCTCTGCGTCTCTCAACCGATATGTGGGGTTCCGAGAGAGATTCTGTTTATACAAGTTACCGAACCACCATATTGTAATTTGTTTTATCAAGAGGAAACACTCGAATAAACATAGGAAAGCTTAAAGGTGTTTAATCAGGAAGGAAAAAAACCAGTAGAAAGATTGAGTTGGTGGAAAGAATTTGGAGAAAGGCATTTGATGAGTCAATTCAGTGCCTCCTCCAGTGGCAAAACAAGTGTGAACTTGAACTTCAAACACGAGGAATGACGGGGAAGGCTATTTGCACCCTTCTAGTAATTTTCAGGGGCTTCGACTGAATTGGGGCTTCTCTAGAACTA…
LOC108201398	ACTACACGTTCATAAAACTCTCTCTCTCGCTCTCTCCTTTCTCCCTCTCACTTAGGTTCCTCTCTGCGTCTCTCAACCGATATGTGGGTATGATTTACGACTTGGACTTGACTCCGTCTTCTTCATTTAGTTATACCCATTGGTATTTCTTCAGTTGACCGGTTCCGAGAGAGATTCTGTTTATACAAGTTACCGAACCACCATATTGGTGTTTAATCAGGAAGGAAAAAAACCAGTAGAAAGATTGAGTTGGTGGAAAGAATTTGGAGAAAGGCATTTGATGAGTCAATTCAGTGCCTCCTCCAGTGGCAAAACAAGTGTGAACTTGAACTTCAAACACGAGGAATGACGGGGAAGGCTATTTGCACCCTTCTAGTAATTTTCAGGGGCTTCGACTGA…
LOC108201398	ACTACACGTTCATAAAACTCTCTCTCTCGCTCTCTCCTTTCTCCCTCTCACTTAGGTTCCTCTCTGCGTCTCTCAACCGATATGTGGGTATGATTTACGACTTGGACTTGACTCCGTCTTCTTCATTTAGTTATACCCATTGGTATTTCTTCAGTTGACCGGTTCCGAGAGAGATTCTGTTTATACAAGTTACCGAACCACCATATTGGGGCTTCGACTGAATTGGGGCTTCTCTAGAACTAGAGCTTCAACAGCTTTTAACTTTAAGTGGGGTTTCGGTTTGCTTGGATTTAAGTTCTATAGACATTCAAGCCGGGGATCGGAACTCGGAAGCATTTTCAGACCCATTGGTCAAAAGGGGAACCAGTGATTGTTACTATTGTGCTTGACAGTACATAT…
LOC108201398	ACTACACGTTCATAAAACTCTCTCTCTCGCTCTCTCCTTTCTCCCTCTCACTTAGGTTCCTCTCTGCGTCTCTCAACCGATATGTGGGGTTCCGAGAGAGATTCTGTTTATACAAGTTACCGAACCACCATATTGTAATTTGTTTTATCAAGAGGAAACACTCGAATAAACATAGGAAAGCTTAAAGGTGTTTAATCAGGAAGGAAAAAAACCAGTAGAAAGATTGAGTTGGTGGAAAGAATTTGGAGAAAGGCATTTGATGAGTCAATTCAGTGCCTCCTCCAGTGGCAAAACAAGTGTGAACTTGAACTTCAAACACGAGGAATGACGGGGAAGGCTATTTGCACCCTTCTAGTAATTTTCAGGGGCTTCGACTGAATTGGGGCTTCTCTAGAACTA…
LOC108202646	ATATAGTGATTTGTTTTATCAAGTGGAAACACTCGGATAAGCATAGGAAAGCTTAAAGGTGTTTAGTCAGGAAGAAAAAATCAGTAGAAAGATTGAGTTGGTGGAAATAAATTGGAGAAAGGCATTTGATGAGTCAATTCAGTATCTCCTCCAGTGGCAAAACAAGTGAGAACTTCTTGAACTTCAAACACGAGGAATGACGGGGAAGGCTATTTGCACCCGTCTAGTAATTTTCAGGGCTTGGATTGAATTGGGGCTTCACTGGAACTAGAGCTTCAACAGCTCTTAACTTTAAGAGGCGCTTCGGTTTTCTTTGATTTAAGCAACTATTACGGAACTTCTATTGCTGACTACCACCGGAGCTGCACAAAATGTCCGTATGATCTATGCATCGCTTGT…
LOC108210940	GTCTCGAGTCCTGCACCTGTGTCTAATTTTGGATCCATATCCAAGAATCCTACACTTTGGTTCTGCACCTGTGTCCGGACTCATATCCCAGTCCAGGCAATTCAGTAGGCATATTTGTGGTTTGTTGATATTTATGGAGGTCGACGAGATCGACGTGCTTGGATCTCAGGCCCTCGCTACTGCTGATGCCTGCTTTCAGGCTGCTCTCCACCAAACTCGAGCTTGGAAGAAACAAGCAAGGGAGCACAAGAAGGCTACCAAGGCCTTAAAGGCGAGATTGAAGGACCTCCGGATCAAGCACATGGAGCAGGAGGAGCTCCTAAGGAAGACTCAAGCGGAGTTGGTTGAGGCGAGGGAAGATAGGGAAACTATCATAGATAAATACATGGATTCAGAGGC…
LOC108208846	AGCGGTAACATTTTGCGGAACAACACTAGAGAACGATGGACGGAGATGCCTCGGAAAACGAGCTCCAGAAGCTTCTCGACGCCATTAAATCATCAGAAGTTGTTGAAAGCCGTGCTCAACTAATTACTAAACTTGGAAATTTAGACATAAATGAGGATGCTGAACTTATTTCTCTTTGGGAATCTCTTACAGTATCAAGTTTAAATCTCCAGTTTTAATGGTGTACTAAGTCAAAAAGACAGATACAAGCTTAGTCCATTTAATCACTCATAAATATTGAGCATGGACCCTCAGTATTTCATGACTGTGCATATCATATATGTCGCAGATTACTCAGTTTAAATCACATCGCTTCGCTAGATTCAGGCATATCCAGAGGTCTGCATCAATATCTTGGTC…
LOC108204704	GTCTACATGATTAAATAAGCGTACTCCACTACATAACGATAAGGAAAGCAACAGAAATGAAAAAGTAGCAGCATCAGCAAAATCAATGGTGCTACTTGGATGCTCTGTTCGCCCTGGTAATTCATCTCTACTGCTTTCGTCAAACCCTAACTTCTCCTACAAGGTGCACTCGAATTCTTTTGTTGTTAGCTCTGTAGAGATTAAAATTTGGAATTGTTTATCATGTGTTCGATTAAATGCCTCTGTGAGACAACAAAGATTTGTTATCCAGTCAGTGAGGAGGGATAGGAGTTCGCATTTAGGTTTACATGGTATTTATTTTCGGAATTCGGGGAAATTTAGTGCGCGTGTGAGGAGAAGTGTGAAAAGTTTGGTTAGTTTTCGAGAGAGGTTTCCGGT…
LOC108204704	GTCTACATGATTAAATAAGCGTACTCCACTACATAACGATAAGGAAAGCAACAGAAATGAAAAAGTAGCAGCATCAGCAAAATCAATGGTGCTACTTGGATGCTCTGTTCGCCCTGGTAATTCATCTCTACTGCTTTCGTCAAACCCTAACTTCTCCTACAAGGTGCACTCGAATTCTTTTGTTGTTAGCTCTGTAGAGATTAAAATTTGGAATTGTTTATCATGTGTTCGATTAAATGCCTCTGTGAGACAACAAAGATTTGTTATCCAGTCAGTGAGGAGGGATAGGAGTTCGCATTTAGGTTTACATGGTATTTATTTTCGGAATTCGGGGAAATTTAGTGCGCGTGTGAGGAGAAGTGTGAAAAGTTTGGTTAGTTTTCGAGAGAGGTTTCCGGT…
LOC108219956	ATCTTGTTTGTTTAGTTCTATTTAAACTCTTGTAATCTTTTTATTATGCGGTGGATATACAATGTAGTTTCAGGAGTTTATATATATTTTCATATGATTTTAATAGTTTAATTTTAACAATTACAACTTTTACAGAAATTATTAGGATATGTATATGTATGCAGCAGAGCACTTGGCTCGGATTCATGCTAATTTCAAATTTGGGAGGTTGTTTACTGCAATCACTCACAAGATTTCACCCAATTATGAAGAAGAGATCAACACCCATTTCATCCTCACCTTCAACACCACCCACTTCATCTCCACAAACCCTAAAAATCAAACAACCCATCTCACAAAATTCATCCAAGAACCCTAAAAGAGCCCTTTTAACAGCACCCCCATCTTCAATTTCCCCCA…
LOC108204624	TTTCAAACAAAACTTTCCTCCATTCACACTTGTGTAAAAAACAATTTATTAACTTTCCTGCTAGTTGAATTTCTTTGAACCAGTTTTACACTTCACTGAGTAGCTTAGGATTTGTGAAGAGAATGCAAGAAATTTAGAAGCTTAGGATTCTTGGGTAGCTCAGAAAAGTGATTTTGTTGGATGATTGAACAATGGGTGGTGCAGCAGCTGGGGTTCAATTCTTGTGGGCTCAGCAAGTTCCTCTTTTGGTGCAAAAGAAATTTCTCAACTGTATGAAACACAATGAGAATCAGAAGCTGGATTGACCAAAGGGTTATCAGAATAAAAGGAAGTGTGCGAAAGATGATGAAGTGCATTTGTTCAGGGGAGCAACTAATTGTTGAGGAAACGATTCCTTCA…
LOC108204624	GTAATGGCCTAGGGGGGTCTGTTTTTCTCAGCTTTTAATCTTGAGATTATGTTCTTTTGGTGATTTGATGTTGTATTTTCTGCTGAATCTACATGGAAATTTCTCAACTGTATGAAACACAATGAGAATCAGAAGCTGGATTGACCAAAGGGTTATCAGAATAAAAGGAAGTGTGCGAAAGATGATGAAGTGCATTTGTTCAGGGGAGCAACTAATTGTTGAGGAAACGATTCCTTCACCAGATTCACTGGCTACAAGAGATTATTCAGCAAGTGGATATTCTTCTCGAACTGGGGAGAATGATACGAAGATTGACACCAGTACTATTGAAGAGGCAGAATCATCTCTTCGGGAGAGTGATTTTTTAAATTATGAGGAAGCAAGAGCGCTATTAGGTAG…
LOC108204219	TTATCACATTCATCTCCGTCAAATACGTCACCACGGCGAACATCTCATCAATTCAACATTATCACGAATAACGCAAATGCATCTGGACCGTCCATTTGCCGCTGCCTTTGATTCTAAATATTCACTGCCTAGTTGGGACAAACGTGCCAATGAAACCAAATGCTACTGTGAAGAACGCCCCGGATTGCAAGAACAAATATACAAACATGTGATCATTGCCGTGCAACATGTTGTATACAGCACAATGAAGCATGAATATCCCCATTATGAACTCCAGCTTGTGAATCCTGTTCAAATTCAGCGTATGAGTTACAAACAAGAAAATGATGAATGTTTCCTATTGTTAGCCTAATTTTTACAAAACATTAGTAGAGCAAGAGTAATTAAATATAACCTCTC…
LOC108204219	GATCATTGCCGTGCAACATGTTGTATACAGCACAATGAAGCATGAATATCCCCATTATGAACTCCAGCTTGTGAATCCTGTTCAAATTCAGCGTATGAGTTACAAACAAGAAAATGATGAATGTTTCCTATTGTTAGCCTAATTTTTACAAAACATTAGTAGAGCAAGAGTAATTAAATATAACCTCTCTCCACATTGGAATTTGGATTTAAAAAAAGAAACTCTAGCTTGGTTATTTCTTCTATTGCCAAGCTTTTCCGTCACAACCCATTCATTGACTCGACTGGCTTCCAATAGCCCGATTATTGATGCCTTAGTTCGGTGAAGGGACATGACATTTTCAAACAGTATCCAGAATACGAGAAGATGCAAGGATCTGCTTGCCAGCATATCAATTCA…
LOC108204219	GATCATTGCCGTGCAACATGTTGTATACAGCACAATGAAGCATGAATATCCCCATTATGAACTCCAGCTTGTGAATCCTGTTCAAATTCAGCGTATGAGTTACAAACAAGAAAATGATGAATGTTTCCTATTGTTAGCCTAATTTTTACAAAACATTAGTAGAGCAAGAGTAATTAAATATAACCTCTCTCCACATTGGAATTTGGATTTAAAAAAAGAAACTCTAGCTTGGTTATTTCTTCTATTGCCAAGCTTTTCCGTCACAACCCATTCATTGACTCGACTGGCTTCCAATAGCCCGATTATTGATGCCTTAGTTCGGTGAAGGGACATGACATTTTCAAACAGTATCCAGAATACGAGAAGATGCAAGGATCTGCTTGCCAGCATATCAATTCA…
LOC108204218	CTGGAAGCATTCTACAAGAGGAGTGAACGATTGAAATTGAAGTCTTTCGTTAGCAAGGACACCCGGAGAACATGCACGCAATGATGCTGCTACGTAGCTACTTGCTAGCTGGAACCGCCAACAATAAAAGGAAGTCATCAAATTGTTGATCGAAGATCCTTACACCACCCTCTCTTCTGAATTTGTTTATATCCTTGTCTTCTGATAACGTTTGAGAATGTCATACCTTCCATCCCTCTATGGCAGCAATAGAAGCTATCCAAGTCAACGAATGAATTGTGACTATTAAGATCCAGAGTTCGGCGCATTCTTGGCTTTATCATTGGGTTTGTTGGCACCTTTGTCCCGAGTATGCAGTGAAGACAAGGGCACTTCCTTGACAGGGTGTCTGCGGGGAGC…
LOC108204218	CTGGAAGCATTCTACAAGAGGAGTGAACGATTGAAATTGAAGTCTTTCGTTAGCAAGGACACCCGGAGAACATGCACGCAATGATGCTGCTACGTAGCTACTTGCTAGCTGGAACCGCCAACAATAAAAGGAAGTCATCAAATTGTTGATCGAAGATCCTTACACCACCCTCTCTTCTGAATTTGTTTATATCCTTGTCTTCTGATAACGTTTGAGAATGTCATACCTTCCATCCCTCTATGGCAGCAATAGAAGCTATCCAAGTCAACGAATGAATTGTGACTATTAAGATCCAGAGTTCGGCGCATTCTTGGCTTTATCATTGGGTTTGTTGGCACCTTTGTCCCGAGTATGCAGTGAAGACAAGGGCACTTCCTTGACAGATATTTTTGGTGCTAC…
LOC108204218	CTGGAAGCATTCTACAAGAGGAGTGAACGATTGAAATTGAAGTCTTTCGTTAGCAAGGACACCCGGAGAACATGCACGCAATGATGCTGCTACGTAGCTACTTGCTAGCTGGAACCGCCAACAATAAAAGGAAGTCATCAAATTGTTGATCGAAGATCCTTACACCACCCTCTCTTCTGAATTTGTTTATATCCTTGTCTTCTGATAACGTTTGAGAATGTCATACCTTCCATCCCTCTATGGCAGCAATAGAAGCTATCCAAGTCAACGAATGAATTGTGACTATTAAGATCCAGAGTTCGGCGCATTCTTGGCTTTATCATTGGGTTTGTTGGCACCTTTGTCCCGAGTATGCAGTGAAGACAAGGGCACTTCCTTGACAGGGTGTCTGCGGGGAGC…
LOC108204218	CTGGAAGCATTCTACAAGAGGAGTGAACGATTGAAATTGAAGTCTTTCGTTAGCAAGGACACCCGGAGAACATGCACGCAATGATGCTGCTACGTAGCTACTTGCTAGCTGGAACCGCCAACAATAAAAGGAAGTCATCAAATTGTTGATCGAAGATCCTTACACCACCCTCTCTTCTGAATTTGTTTATATCCTTGTCTTCTGATAACGTTTGAGAATGTCATACCTTCCATCCCTCTATGGCAGCAATAGAAGCTATCCAAGTCAACGAATGAATTGTGACTATTAAGATCCAGAGTTCGGCGCATTCTTGGCTTTATCATTGGGTTTGTTGGCACCTTTGTCCCGAGTATGCAGTGAAGACAAGGGCACTTCCTTGACAGGTGTTTGTTTGTTGGA…
LOC108204218	CTGGAAGCATTCTACAAGAGGAGTGAACGATTGAAATTGAAGTCTTTCGTTAGCAAGGACACCCGGAGAACATGCACGCAATGATGCTGCTACGTAGCTACTTGCTAGCTGGAACCGCCAACAATAAAAGGAAGTCATCAAATTGTTGATCGAAGATCCTTACACCACCCTCTCTTCTGAATTTGTTTATATCCTTGTCTTCTGATAACGTTTGAGAATGTCATACCTTCCATCCCTCTATGGCAGCAATAGAAGCTATCCAAGTCAACGAATGAATTGTGACTATTAAGATCCAGAGTTCGGCGCATTCTTGGCTTTATCATTGGGTTTGTTGGCACCTTTGTCCCGAGTATGCAGTGAAGACAAGGGCACTTCCTTGACAGGGTGTCTGCGGGGAGC…
LOC108205258	CAAACATTCCCCAATTCTATTCTGTTTCTATATAAACAACTTCAACACCCTAGAAAAAACAGAATTCTATACTTACAGCCTATACATACAGACTATGAGTGAGGCGTTGAAGCGAGACTACACCGTGTGCGAAGAGATCGGACGGGGACGATTCGGCGTTGTTTCCCGGTGCTACTCGGCCGTCTCCGGCGAGTCGTTTGCCGTGAAATCCGTCGAGAAAAGACTGCTCGCCGATGACTCGATTGATCGGCAATGTTTGTATAATGAAGCTAAGATTATGCAGGTTTTGGCACCGCATCCGAATGTGATACAGGTTTATGATGTGTATGAAGATGAGGACTGGTTGCATCTGGTGATTGAGCTGTGTAACTCGCCCGATCTTTTTTGCCGAGTCAGTGA…
LOC108221446	TGAGTAGCGAAGTACGTCACTCTTTTAGGTATATTCTGATATGCAAGTAAGCCAGGTAGCTGTGATTGTTACAACTGGAATATATACATGTCCTCAAGAACATGATGCCAGAGCAACATGAAATAAGAATTACAGAGAATACGATACTTCTATCAACTATTTTGTGTATTTAGGGAGCAGCATTTGTCGCCCGAGCCAGAATAAGTAGCATATCAGAGGCTAATGGCTGTAGAAGGTAGTAGGCTGATGACAATTTATAGGAGGTTCAAGCCACACCTCCTTATGGTGCTGGCTCAGTTGGGATATACATTCTTATATCTGATCACTGAAGCTTCCTTTGCTCATGGAATGAATCCTCATGTTTACATTACTTATCGACATATCGTTGCTGGTTTTGTT…
LOC108221446	TGAGTAGCGAAGTACGTCACTCTTTTAGGTATATTCTGATATGCAAGTAAGCCAGGTAGCTGTGATTGTTACAACTGGAATATATACATGTCCTCAAGAACATGATGCCAGAGCAACATGAAATAAGAATTACAGAGAATACGATACTTCTATCAACTATTTTGTGTATTTAGGGAGCAGCATTTGTCGCCCGAGCCAGAATAAGTAGCATATCAGAGGCTAATGGCTGTAGAAGGTAGTAGGCTGATGACAATTTATAGGAGGTTCAAGCCACACCTCCTTATGGTGCTGGCTCAGTTGGGATATACATTCTTATATCTGATCACTGAAGCTTCCTTTGCTCATGGAATGAATCCTCATGTTTACATTACTTATCGACATATCGTTGCTGGTTTTGTT…
LOC108221487	TATAACATTTCCGCCTCTGCTCTGCTGCTGCTTCTTGGACCCAAATCTCTCTCTTTTTCTTCCTTCCGCCCCATCTTAACAACATAATCTTCCATTCGCCATTTTTAAACCTCTCTTGTTTGCTTAAGTAGCTGAGATTGGAGGGGTGTTTATTGCAGGGGGGGTTATAGTGGGAATGGCTGGGACTGCAAGTGAAGAGTCTGGAGTTGGAAGGTCGTTGGAGGGAATATCAAGTGCGCAGCAGCGTTGCCAATCAAGTGAAGCATTGGCTGAGTGGCGATCTTCTGAGCATGTGGAAAATGGATCACCATCGACTTCACCTCCATACTGGGATACTGATGATGAGGATGACTGTGGGCCAAAACCTTCTGACTTGTATGGGAGGTATACATGGAAGAT…
LOC108221487	TATAACATTTCCGCCTCTGCTCTGCTGCTGCTTCTTGGACCCAAATCTCTCTCTTTTTCTTCCTTCCGCCCCATCTTAACAACATAATCTTCCATTCGCCATTTTTAAACCTCTCTTGTTTGCTTAAGGGGGGGTTATAGTGGGAATGGCTGGGACTGCAAGTGAAGAGTCTGGAGTTGGAAGGTCGTTGGAGGGAATATCAAGTGCGCAGCAGCGTTGCCAATCAAGTGAAGCATTGGCTGAGTGGCGATCTTCTGAGCATGTGGAAAATGGATCACCATCGACTTCACCTCCATACTGGGATACTGATGATGAGGATGACTGTGGGCCAAAACCTTCTGACTTGTATGGGAGGTATACATGGAAGATAGATAAATTTTCCCAAATTAACAAGAGGGA…
LOC108208688	ACCCAACAATTATAACCGATACATCGGGCAGGTATAAAATATGTGCATCTGACTTCTGATGACACAGTTTTGAGTTCCAACAATGGCAAAGGCAGTGGCCCCTCCGCTTTACTTGGCGTCTTGGTCTTACTTAATTTTTTGTGCTCTCTTCTGCTTCAATCTTCAGGTTGTTCTATCGAAGTCAGCACCATTGCTAAAATTGGATTCTAATATTCTTCAGGAATCAATAGTTGAATCAATCAACAACAATTCAAAAGCTGGATGGAAAGCCTCCATAAATGATCGATTTTTAAACTACACTGTCTCACAGTTTAAGCATCTCCTGGGAGTCAAACCAACACCACCTGGTGATCTACAAAGCATTCCTGTTAAGATCCATTCAGAAAGACTGAAGTTACC…
LOC108204790	ATCAGATCTACATTAGGCCTCAAACTCTCCCTGTTGAATCCACATCCAAGTCCTACAGAGCATTTCTGCCATGGATTTCATTAATGCGCTGAAATCAGGATTTAACCAACCAATGATGGGGGTGACTGAGAACAACTCAGCCACTTACTTGTCTTCTGGCAATCCATGCCTCGACTTCTTCTTCCATGTCGTCCCCAGCACACCATCGAGTCAGCTGCTCCAACGTCTTGAAGCCTCGTGGTCTCATGATCCCCTCACCACTCTTAAGCTCATCTGCAATCTTCGAGGCATTAGAGGTACTGGGAAGTCTGATAAAGAAGGGTTTTACAGTGCAGCGCTTTGGCTGCATAAACATCATCCCAAAACTTTAGCAGGCAATGCTCATGTTTTTGCCTCGTT…
LOC108204764	GAACGGATGGAGTGCATCAATTAAAAACTCTACAGATAAAAATGAGTGGCATGTTGATGTTGAGTGTGTTAACTTAACCGGAGTGAACGTGGCAGAGTCTTAACCACTTGAACAAAATAGAAGTTGATGTGAAGTCCACAAAAGTCTCCACTCAGCTGCTGTAATGTTTGTGTAAATGCCTCCAAGCTCCTTTCTTTTCTTCACCAGAATCTAATTATAATCGTACTAGTACATGTTGTTTTGTGGGTACTTTTACTGTACTTGAACTACAAACTTCTTTAAAGGTTAGTGCATATACTAATCATCTTCTTGCTTATAGTTTTATTAATATCAAATGGGTGTTTTTTTCTCTTGTTTAGCTTCCCATTTTCTTGCTTTTTGATTAATAGGGAATTGTTG…
LOC108209393	CCGCGTCAAAACATTTCCACCAATCACAGCCCGTCTCTCTCGTATATATATCCTCCCCATTTCAATCTCCACTCATCACAATCTTCAAACTACAGTTATTCACATCTCTCCAAACTAAAAACACACATCAAAAATCTCTATATTCATTTCTTCCTTAATGGCCCCTGCAGCAGTAGCGAAACCGAAGGCTCCTAAAGTTGCTAAAGAGAAGAAAGCAGCTGTTGTCAAGAAGCCCCGGGCTCATCCTCCTTATGCTGATATGATTAAGGAGGCAATTGCATCGCTCAAGGAGAGAACTGGTTCGAGCCAATATGCAATCACGAAGTTCATCGAAGACAAACAGAAGGACTTATCGCCGATGTTCAAGAAGCACATTAGCCTTCAATTGAAGAAACTCGT…
LOC108225567	GCCTTCTACACGTACTGTGCTAATAATAACTCCCAGCTCTCACTGTCCTCACTGATTATTTAAATACGGACAACTACGAAACTCCATTCACTCAGATCAAAAATACACAATCACACCCAGAGAGATAACTATAGAGATAGAGAGATCGTCGAGAGAGATTAGTATTTTGAAATGCTTCGTTTGAATCACACCTCTCGGCCATGGTCTTCACCTATTCCTACTCAAATTTATCCTTCCCGCAGGGAAGTGGGAAGAAAATTCTTGTATGGTGTGGGACAAAGCAAATAACAATAAGATCTTGAAGGTGGATCTCAAAAGTCGTCTTCAGCATGTGCAGGGTAAAGATAAACTTATGATGTCGTATCTGTCATGCTATTCCCTGGGTAGAATGACACAACA…
LOC108221494	TTAAAGCAACCACTAGAAATTCAACTCAACAACTTCTTCTTCATCTGTGTTCAAATGTCTTGTTCCATAACAAAGTAGAATAAACAACTTGAAAAAGTCAAGCAAAATGACAAAACATGACTATACTATGATACTATCATAACTCTCTTTTTCATTTTCATACTCCCAACCAAATCATCACCTTCTTGAAATTACATTCTTTTTTGTAACGCACGCCTGTAACTAATCAACTCACATAATCATATATACTAACACTTTATCTTTCCTCATTCTTCAAGATTTTCAAAACCCACCAAAACCCATTTGCAATTTCTCTGTTGGGTAAGTTTTATTTTCCGGCGAGTTGCCGGAATAAGTGAATTCCGGCATGGCAAATAATCCGGCAGAAGGGTACCCGGA…
LOC108226660	TTTAGCAGCACTTTTTAATCCTTCTTTCGATTCTCCCACCAAACCAAAGCATAACCAAAGGGGCTTTGAGTAGAAACAAAAGGAATTAGTAGTTAAAGTGGACTTCTCAGCACCAGAACTACTCTCCCGGTGATTACACACACACATTTTATATTTTTACAAATGGATTCTGATGATTCGGAGCAGATGCGATCGGTTGTTACAGATACTAGAGGCAAACATAGAATTCTAGCCGAATTGAAGCGTCTCGAGCAAGAAGCTCGATTTCTTCAGGAAGAGCTAGATCAGCTTGAGAAGTTGGAGAAAGCCTCTGCTGCATGCAACGAACTGCTGACTATTGTGGAAACAAGCCCTGACCCGTTGCTGCCATTAACGAAAGGTCCCACTAATCCAACATGG…
LOC108226660	TTTAGCAGCACTTTTTAATCCTTCTTTCGATTCTCCCACCAAACCAAAGCATAACCAAAGGGGCTTTGAGTAGAAACAAAAGGAATTAGTAGTTAAAGTGGACTTCTCAGCACCAGAACTACTCTCCCGGGTTTCAAAGTAATTGGGGTGAATTAATCTTTGAAATATCTTAGATTTTTACAAATGGATTCTGATGATTCGGAGCAGATGCGATCGGTTGTTACAGATACTAGAGGCAAACATAGAATTCTAGCCGAATTGAAGCGTCTCGAGCAAGAAGCTCGATTTCTTCAGGAAGAGCTAGATCAGCTTGAGAAGTTGGAGAAAGCCTCTGCTGCATGCAACGAACTGCTGACTATTGTGGAAACAAGCCCTGACCCGTTGCTGCCATTAACGAAA…
LOC108226660	TTTAGCAGCACTTTTTAATCCTTCTTTCGATTCTCCCACCAAACCAAAGCATAACCAAAGGGGCTTTGAGTAGAAACAAAAGGAATTAGTAGTTAAAGTGGACTTCTCAGCACCAGAACTACTCTCCCGATTTTTACAAATGGATTCTGATGATTCGGAGCAGATGCGATCGGTTGTTACAGATACTAGAGGCAAACATAGAATTCTAGCCGAATTGAAGCGTCTCGAGCAAGAAGCTCGATTTCTTCAGGAAGAGCTAGATCAGCTTGAGAAGTTGGAGAAAGCCTCTGCTGCATGCAACGAACTGCTGACTATTGTGGAAACAAGCCCTGACCCGTTGCTGCCATTAACGAAAGGTCCCACTAATCCAACATGGGATCGTTGGTTTGAAAGGCCTCA…
LOC108226315	CTAAGCAATAATAGTGCAACACTACTGTATTTAAACTTTTTAGCATTTCTAACGCTATATTTTCCTAGCCACGCTATAAATATCCATGCATGACCTCTGCTAAAATCACCATATAATTAACCCCTTCCTCTGTTCTGGTTATTTTTGTTGTCAAACGCCTCATCACAGATCCACAGGCTTTGAAAGATGAGTTCAAAGCCGAGTCTTTCACAAGTTCTTTTCATATTTCTTAACCTTCTCTTTCTTGCACTAGTAGTCAATTGCACTCGCAATTGTAACAATCCTCCAGACCATAAACATAAACATAAACATAAGCATCATAAACACAAGTCAAGCTCGCCTTCCTCTCCTACTCCCCCTGCCCCAGAGAGTCCTAAGCTGCCCCCTGTTTTTCCCGGG…
LOC108226315	TGATTTAAGTTGTTTATCACGAGCTCAACATTTATCATCAAATGCAAATACTATAACGGTGTACATAGTGCCAAAAATTATATAATATTCAAGTGTCTTAGTCTTACAATGTGGCTTATTGAATCTTTTTTCTTCTCGATTCTCCATTATCTCTTTCACTTGGTCAAACAAGCGATGAAAACCTTGAAATTTTCTATTTTCTCCATAAAGGAAACTTAGTAATTATTATTTCAACAAATGATGATGCAATGATTACAGTAATCCACAAGCTGAAGATGATACAATTGCAATGCAAATATAATGGCAGCTGCAAATATAATGCACACGAGGCAAAAGCCACGTAATAGAAATTAAAGGAAAGGAAATTAAGATTTATTTTTATGAGCATTGGAAATTCGG…
LOC108225680	AACAATGCATTAAAATCCCAATCGAATACACCCCCGTAAGTAAACCTCAACTCTTTTCAAAATCAGTGTACACACACACACAACAGCTTCAACACCACTTTCCTTGAATCAAACAAAATCAGCTCCACGGTGCATATATGGGAGGCGTGGCATCAGCTCCGCGGTGGACTACCAATGCGCAACACCAACACACGGCGGAGTACTTGATCGGAGGATTTATCGGAGAGATTTCGTTCCCGATTAACTCGGAGTTTTGGCAGCAATTGCTTCTGCTTCCGTTTGATCACAACTGGCCTTCTAATCGTTATCACGAGGCTTGCCTTATTTTCGCACAGAACAATTGCTTCACAAGGCATCTTGCTAAGATCTTAATCCACCTAGCTTGGTGTTTACAAGCGC…
LOC108225680	ATTAGAAGGCCAGTTGTGATCAAACGGAAGCAGAAGCAATTGCTGCCAAAACTCCGAGTTAATCGGGAACGAAATCTCTCCGATAAATCCTCCGATCAAGTACTCCGCCGTGTGTTGGTGTTGCGCATTGGTAGTCCACCGCGGAGCTGATGCCACGCCTCCCATATATGCACCGTGGAGCTGATTTTGTTTGATTCAAGGAAAGTGGTGTTGAAGCTGTTGTGTGTGTGTGTACACTGATTTTGAAAAGAGTTGAGGTTTACTTACGGGGATAGAGATGGATTCAGC
LOC108226372	AATAATGCGTTTAATATTCAAAGGATATATTTAGAATAAGGACGTGTTTGCTTGTGGCGTAGCTTTAAAGCGTAAAAAAATTCATCCAGAGAGATCGAGAGATCGAGAGAGAGAGAGAGACAGAGAGGAGAGAACTTAAATCTTTAATAAAACTTTTTGATACAAGGCGCAAATGGGGTCTATCAGCAAGGATGAGAGGGAGGAAGTTATACAGGCATGGTACATGGATGATAGTGATGAAGACCAACGATTACCCCATCACCGAAATCCAAAGGAATTTGTCTCGCTAGAGAAACTTGCCGAACTTGGGGTGCTTAGCTGGCGACTAGATGCAGATAATTATGAAACAGATGAGAAGTTGAAGGAAATTCGTGAATCACGTGGATACTCTTACACGGA…
LOC108226508	ACCAATTGTCAAGGTCTGAACTCTGAGTCACTTTCAATTTTATGTAACCTAGTCTCATATTATGAAAGTTGTTGGATTACCAAGTAGTTTGGTCACCTATAAACGCCATGTTCAAAGTTGATCCTTCTTCTCCAAGTCCTATAATAACTCAGCTTCATTACATTTCTTCTCAACAACTTCACTGCCCAATTATTTCACTCTCTACATTCATTACCATCTTCATATACACATAACAATCATCCAATGTCTCACTCGAAAGTAAGTTTTGCGCTTGCCATGGTCCTTGTGGCCACTCTCTGGACTGGATCTACAGCTCAAACGTCGGATTGCACCAACACGCTGATTAGCCTGTCCCCTTGCCTCAACTACATTACAGGCAACACCTCCAAGCCGGATTCA…
LOC108225599	TTGCAAATAGAAAAACACACACAAGGAGTGATTGGATCCGTGTAACAATTTTGCGTTCTTAACCGTTCTCTTCAAATTGAGGATCAGGTAACGCCTATATATATGTGCGTGTGTATGCCAGATTTATTCTATAGCTGGATTTGTTTCCGTTTTGTATATTTATTTCTAACACTTGTATTATGTTGTGCTGGGTGTAGGTTTAGTAGCTAATTCTTTCTTATGTCTAATTTTTTTACCGAATATGATAAGTGAGATGATTCTCCCTCCAGCATCATCTCTTTCTCCTTCTGTGATAAGCTATTTGGATACGAAGCTCCATACAAAACATGATCAAGAAGCTTCATCTAGCCTGCTTCTGGAGTTAGAATCTGAGTGCAACGACTTGGACAAAACTCTTTC…
LOC108226021	TTCGGATTTAATACCTAACTGAAGACGCTCCTCGTTCACGCGATACATGTGTATATCCTCTCGATTTACTTATTCCCTTTAAACCAACTGAGCCCATCTCTCTTTTCTTTGTTCTGTTGAAAATATACGTGTATATCTATCTCTATATTATATATCGTCATAAGTTCCCTTCAAATCCTGAACCTAAGTAAACTTCTCTTCAAAGTTGCGATTAACACTTCTTAGATCTCGAATACTTCACAACCAGGCTATCTGCAAAACCATGGCTCTTGCGCAAAATTATAGGTCTCAAGCTGGACCCTTTCGTGGTGACCGCAGGCCTTCTTTTAATAGAAATCACCATCATTTGAGTACCAACATGGCACCTGCTATTAACAACAGCTACAATGTCCCTGGCAA…
LOC108226021	GTGATCTTCACAAATATTGGTTTGTACTATTTTTTTTTTATATATGTGTGTCAGTGTGTGTATATTTATATAAACTTCTTCACTCATTTTCCAAAAAAAAAAACTAATTTGAGTTTTGCACTTAATTATTGAGCATTTAACTCTCTTGTTTCTGTTGATGTATTTGGTGGTACATGCCTAGCGTGGAGCTTGACCATTGTGTCGCGGAAATATGTGCAGCTTGTAAAAGAAGTAATGAGAATATTATACAGTAGTATGTCAACTAATGGGGCAAATCTAGTTGGAGACTCAAAATATTAGGTTTTTAATGGAAAGCAGAACTTTTGGCTCTGGATATAGATGGAACTTCCGGTCTGGAGATTTTCGTCACTTCCAGGAAGCAATCTCGTCACCTTTTTT…
LOC108226021	CTGAAGACGCTCCTCGTTCACGCGATACATGTGTATATCCTCTCGATTTACTTATTCCCTTTAAACCAACTGAGCCCATCTCTCTTTTCTTTGTTCTGTTGAAAATATACGTGTATATCTATCTCTATATTATATATCGTCATAAGTTCCCTTCAAATCCTGAACCTAAGTAAACTTCTCTTCAAAGTTGCGATTAACACTTCTTAGATCTCGAATACTTCACAACCAGGCTATCTGCAAAACCATGGCTCTTGCGCAAAATTATAGGTCTCAAGCTGGACCCTTTCGTGGTGACCGCAGGCCTTCTTTTAATAGAAATCACCATCATTTGAGTACCAACATGGCACCTGCTATTAACAACAGCTACAATGTCCCTGGCAACTTTGTATTCAACTATGA…
LOC108225633	ATCTTAGAATATAAGATCTTGGAAAAGACCATTCTCTAACTCTCGAGTGAGGAGGAATGTTAGAATATAAGATCTTAAAAAGCGCCATTCTTAAAATCATCTTAGAATATAAGATCTTGGAAAAGACCATTCTCTAACTCTCGAGTGAGGGGGAATGACACATTTCAAGATTCCTATAAAATGCAAAATGCAGTTTCACAAATACCGACAATTTCGTTGACACAAGGTGCTCTTGAAAAAAGGATTATTTTAACTTAAAATAATTTAAATATAAGCTTAGCCAAGTCAACCCGCGATTTTCCAGAAACATAACTAGTCAAGGCATTTGTATTGCATCTGTTCCTTTGATTAAATCCTCTCATCTTGTTATTACTGTTGTTGAATTTGAGTTCTTGTAGA…
LOC108225633	TTGAGGTAGGGCCTCATTTTCAACTTTTGCTTAGGCCCCAAATTTGGTTGAGCCGGCCCTGATTCCACTCATCTTGTTACTGAAAGCTAGTCTATCTTTTCTAAATATATTATTTTTGAATTTCACACTAATCTGTTGAAGAAGTTCTTGTATAACATTGATTTAACTCGGGTCCAATGACGGAGAAGTCGAATGGGGTGGTGATTCTCATCACTCTATTGAATATCTTGCTCTATAAGCTCCAGAAACTCCAAGAAGCTCAACAAAAAAGGCGCTTACCGTTGTCTGTTCGACAATTGTGTCGTCGTTTCTCATTTGCAGACATCAAGTCGGCAACAGAGAACTTTAAGGAAGATTTGGTGATTGGAAAAGGTGGATTTGGAATTGTGTATAAAGGTT…
LOC108225633	ATCTTAGAATATAAGATCTTGGAAAAGACCATTCTCTAACTCTCGAGTGAGGAGGAATGTTAGAATATAAGATCTTAAAAAGCGCCATTCTTAAAATCATCTTAGAATATAAGATCTTGGAAAAGACCATTCTCTAACTCTCGAGTGAGGGGGAATGACACATTTCAAGATTCCTATAAAATGCAAAATGCAGTTTCACAAATACCGACAATTTCGTTGACACAAGGTGCTCTTGAAAAAAGGATTATTTTAACTTAAAATAATTTAAATATAAGCTTAGCCAAGTCAACCCGCGATTTTCCAGAAACATAACTAGTCAAGGCATTTGTATTGCATCTGTTCCTTTGATTAAATCCTCTCATCTTGTTATTACTGTTGTTGAATTTGAGTTCTTGTAGA…
LOC108226051	GTCAGATAGGTAAAATTACAGTGCACCTCAGAGCAGCAGATTGGAAACTTCAAGATTGAAGGGCATTCTTAAACACAGCTAAACTACACCTTTTCAACATCTGTTATAGTTTCTTTCTCATCAAGTTCAACTAGAATTGAATGGATGCTGGGTTTTTCATCTGTAACTAGAAGGCAACAACACTTGATTAGGTGTTTGGGAGGTTGTAATAACCACTATAGATACACAACAATTCTACATAATCACAATCAGCAGCAGAAAAAAATGCAGTCTGTGACACCTATTTTAGAAGCTGATGCTGTCAGTATAATTAAGTCAATTACTCCAGCTCTTGATCATTCTAGGCACAAGGGCCAAGCAGGAAAGATAGCTGTTGTAGGTGGATGCCGCGAATATACA…
LOC108226429	TGATAATAATTCGAATATGTTAACATCTCACATTCTCCCTAATTTCTTTGCAATTTCCATTGTTTGTTTGTGGGTCTGAACTGACGATCAAAGAAGTGATCTACACGAGGACTTGCAATGGATCAGCTCGATGAAGCCTATAGGGGACGAATTAACACTCTCCTGAGAGCAATGTCTGTGGCGAAGGGTGTAAGAAATGATGATGTTCCATGCCAAATTGAAGAGGGTCTTTACTTGGGTTCCATCGGAGCTGCAAATAATAAGAGTGCATTGAGAAGCTTAAATATCACACATGTTTTAACTGTGGCCAGCTTAAAGCCTCCGTATCCAAACGAGTTCAAATACAAAATTGTTGATGTCCAGGACCAACCTGATGTAAGCATCTCTCGATATTTTGAT…
LOC108226720	AAGTCTGAAGAGTCGAGAGTCCATTTAAGTGAGCAACAAATACACACTCATACAGAATCATAGATAGACGCCGAAGCACACACTCTGACACTACCCTAATTCCTAACTCAGCTGCTCACTGCGACAAATTCAGCGGCGAGCCCACCACAACGGCTGCTCAGCTCCTCTCTAACTCTCTCCCTCCCTCCCGGCTCCAGTGCCCACAGCTGCAACCCCCAATTTCTAGCTGTAATGCAGACAGATGGGTTTGATTACTTAAAGCAGAGCTGCCCTCTGTCATCTCTGAATTGTTGGAGTGTGTGGCGAGGATCAGTGAGCATCCTGTTATTTCATTTGGTTACAGGAATGAACCTTCCCTTGACGGCGCTGATATGAATGGCAGGCGAGGGAAACAAAGAA…
LOC108226720	AAGTCTGAAGAGTCGAGAGTCCATTTAAGTGAGCAACAAATACACACTCATACAGAATCATAGATAGACGCCGAAGCACACACTCTGACACTACCCTAATTCCTAACTCAGCTGCTCACTGCGACAAATTCAGCGGCGAGCCCACCACAACGGCTGCTCAGCTCCTCTCTAACTCTCTCCCTCCCTCCCGGCTCCAGTGCCCACAGCTGCAACCCCCAATTTCTAGTTCAGAGTGACCGCGGATTGTTTCTTGCAAGAGCTGTAATGCAGACAGATGGGTTTGATTACTTAAAGCAGAGCTGCCCTCTGTCATCTCTGAATTGTTGGAGTGTGTGGCGAGGATCAGTGAGCATCCTGTTATTTCATTTGGTTACAGGAATGAACCTTCCCTTGACGGCG…
LOC108225969	ATTGGCCTTAAAAGCAGACAAAAAGACAAAGCGAACGGGTCGGGCCATTGCATGTTCTATATATTCACCTTTTTATCTTCTTCTCTTCATTCATTTCTTCCCCAAAGGTCTCCATTATCAATTTCTCATCCTCTTCCTCCCCGTCCTTCTCCGATCATCCCCCAATTTCTCAGCTCACATAACCAATCAACTAATACATACAATCACACAAACCTATACACACAAGCCCCAAATCTCTGATCTTTGAACAGAACCCTCAAAACCCAAAGATCTAATCTCACAAAACCATCGATTATTAACAATCTAATTCAATTCACCCAATTATTTCTCTATTTCACACCTCAAATCAGAGACCCAATTCACCGATTGAGCGGAAACCCTAGAAAAAGAAAACGCCCA…
LOC108225821	TCACCAAACCTCTTCTAAATTTCGTGCTCTGTATATATAATTATCTGTGTACAACATAGATATTATATATACAGTGAGAAATATGGCGATTGAGGCTATTGAGCAGGTTAAATATATCGAAAATGATGGTAACAATGGCTTGGAAGATTTAGAACAGCCATTTCTTGAGGCCAAGACAGCAGTGCATTCTGATGATGAAAAGACTGCTAGTGGAGCTATTTGGGTGGTTTTGTTTAGTACCCTTGTTTCTGTCTGTGGATCTTTCGAGTTTGGCTCATGTGTGGGATACTCTGCACCTACTGAATCTGGTATTAGAGAAGATTTGGATTTGACACTGGCCCAGTTTTCCATGTTCGGATCACTAGTAACCGTTGGTGCGACGATTGCTTCCTTTACATG…
LOC108226094	TTTTATAATTAAATAGCCCACAAACAGCACTAATCTTATTTTTGGCGGTGAAAGATTACGACGGCCCAAGAAGATATCCAGCATTTAAAATATTTTCCAGCATGTCTCATCTTCTCCTCACAACCCCACCGACGTCGTCAGCATATTCATTCGCCGGAACTTCCCCGGCGTTGTACTTGAAATTCACACGCGCCACCACTTGTATCTCCATCTTCTCACGCTCCAAAACCTCTAAATTAACTCTAAACTCACCGCCATCGTCTCTGACTCAGCGCCAATGTGCGGCGAAGATGGAAGTAGAGACTTCTTCTTCTACTTCCGGATTTGTCGGAGCTGATGATTTGTTGATCGTCGGTCCCGGTGTTCTTGGCCGCTTAATTGCTCAAAAATGGCGTCAGG…
LOC108226094	TTTTATAATTAAATAGCCCACAAACAGCACTAATCTTATTTTTGGCGGTGAAAGATTACGACGGCCCAAGAAGATATCCAGCATTTAAAATATTTTCCAGCATGTCTCATCTTCTCCTCACAACCCCACCGACGTCGTCAGCATATTCATTCGCCGGAACTTCCCCGGCGTTGTACTTGAAATTCACACGCGCCACCACTTGTATCTCCATCTTCTCACGCTCCAAAACCTCTAAATTAACTCTAAACTCACCGCCATCGTCTCTGACTCAGCGCCAATGTGCGGCGAAGATGGAAGTAGAGACTTCTTCTTCTACTTCCGGATTTGTCGGAGCTGATGATTTGTTGATCGTCGGTCCCGGTGTTCTTGGCCGCTTAATTGCTCAAAAATGGCGTCAGG…
LOC108226692	TGTTCTCAGACATTGTGTTTGAATGTTTCCAGAATTTAACAAGACTGTGCCAAATTCAAGTTTTAAGACTCCAACACGTGCTGATAATGTTGCCAACAGCCCTCACACTCCACACAAGGTTCTGCCGTTACACAAGTCACCAGGGCCAAATCCGTGAATCAGACAGATGCATTTAAGCTCCCAACTCAAACACAATGTAATTGTCATTATCCGTATTTTCATGCCTTTTTTATTAACAACTCTCTGATTGTAGGTTCGGCCACATCACATGCTACATCACAAAGGCGTTAAACAATGCCGGCGTATGTGCTGCTCATCATAAGGTTCAGCAGGCATATCTCACGCTATCACAGAGGAGGCTACAGAGGAGACTTTTTTTCCGTATTTGGGTTTTGTTGT…
LOC108205067	TCAAAACCGGACCTGAGGTATTTCGGTAATTTAAAAGATTGGGGTTGTGCGAAGTGCAAAGAACAGCATCTCAGCGGCGCAGTCATTACCCAATATCTTCTTCTGGAAGAGTAATCAAAGATTAAAGGAGCCCTTTTCACAACTATACAAGCTCACCCAGTTTTTTGAGGAAGAGCAAACATGTCGCGGAAAGGTTTGATGGAGCAGGATTTGAGCAAGCTGGATGTGACAACATTACATCCTCTCTCACCTGAAGTTATATCTCGACAGGCTACAATAAATATTGGCACTATTGGCCATGTGGCACATGGAAAATCAACTGTTGTAAAAGCCATATCTGGTGTGCAGACTGTACGTTTCAAAAATGAGTTGGAACGTAACATCACAATCAAGCTTGGG…
LOC108205917	TTAATTCCATAAAAACTTTCTGGGCTGAACTCCGAATGTAGCACAACCGGCCCAACTTCTAGAACTTATCCATACGTTACAATACGCAGAGCGGCAGAGGCTCCATCATCTATAAATAATTAACCACCTGTTATCTCTTGTTCACCACTGCCTTGCGCCCACAAAATAATACTAAAAAAGCTCACTTTTAAGTCAAACATGGAAGGCATTGAGCACAGAACGATCAGCGCCAATGGCCTCAACATCCACGTAGCCGAAAAGGGCCAGGGCCCCACCGTCCTCTTCATCCACGGCTTCCCCAAGCTCTGGTACTCCTGGCGCCACCAGATCCATTTCCTCGCCTCCCACGGCTACCGCGCGGTGGCGCCTGATCTCCGTGGCTACGGAGACACCACGGGG…
LOC108205917	TTAATTCCATAAAAACTTTCTGGGCTGAACTCCGAATGTAGCACAACCGGCCCAACTTCTAGAACTTATCCATACGTTACAATACGCAGAGCGGCAGAGGCTCCATCATCTATAAATAATTAACCACCTGTTATCTCTTGTTCACCACTGCCTTGCGCCCACAAAATAATACTAAAAAAGCTCACTTTTAAGTCAAACATGGAAGGCATTGAGCACAGAACGATCAGCGCCAATGGCCTCAACATCCACGTAGCCGAAAAGGGCCAGGGCCCCACCGTCCTCTTCATCCACGGCTTCCCCAAGCTCTGGTACTCCTGGCGCCACCAGATCCATTTCCTCGCCTCCCACGGCTACCGCGCGGTGGCGCCTGATCTCCGTGGCTACGGAGACACCACGGGG…
LOC108205917	TTAATTCCATAAAAACTTTCTGGGCTGAACTCCGAATGTAGCACAACCGGCCCAACTTCTAGAACTTATCCATACGTTACAATACGCAGAGCGGCAGAGGCTCCATCATCTATAAATAATTAACCACCTGTTATCTCTTGTTCACCACTGCCTTGCGCCCACAAAATAATACTAAAAAAGCTCACTTTTAAGTCAAACATGGAAGGCATTGAGCACAGAACGATCAGCGCCAATGGCCTCAACATCCACGTAGCCGAAAAGGGCCAGGGCCCCACCGTCCTCTTCATCCACGGCTTCCCCAAGCTCTGGTACTCCTGGCGCCACCAGATCCATTTCCTCGCCTCCCACGGCTACCGCGCGGTGGCGCCTGATCTCCGTGGCTACGGAGACACCACGGGG…
LOC108204620	TATATAATCGAAATTGGACAAACATATAATAATATCGTTGTTAAATGCATCACCACAAAAACCCTTGTCACTAATTCAACATCATAAAAATCCCATAAGATCTCTAGTCTGGGATATCATGAACAACAAAGACCAAACTCTCGTAGAAAGAGATCAAACAATAATCAAATAAATTGGAAATTTATTAATATCAATAAAAAATAAATTAAGAATAATAAACGGGCGACAAGCTAATTTCCATCTAACATTATTTGCTGTAACCATGTAAAATTAATCAAAAGTTCTAATCAGCCCATATTTCAGTTAAAAAACTAGGCCCACCCAATCCCTCTGGTACAGCCCACCCACTACATCAAGTTAAAGAATTTAAATTGGATTAGTAAAAAAACATAAAAAATA…
LOC108204620	TATATAATCGAAATTGGACAAACATATAATAATATCGTTGTTAAATGCATCACCACAAAAACCCTTGTCACTAATTCAACATCATAAAAATCCCATAAGATCTCTAGTCTGGGATATCATGAACAACAAAGACCAAACTCTCGTAGAAAGAGATCAAACAATAATCAAATAAATTGGAAATTTATTAATATCAATAAAAAATAAATTAAGAATAATAAACGGGCGACAAGCTAATTTCCATCTAACATTATTTGCTGTAACCATGTAAAATTAATCAAAAGTTCTAATCAGCCCATATTTCAGTTAAAAAACTAGGCCCACCCAATCCCTCTGGTACAGCCCACCCACTACATCAAGTTAAAGAATTTAAATTGGATTAGTAAAAAAACATAAAAAATA…
LOC108204620	GGGCTCACAGTTGTGGAGGCAATGACTTGCGGTCTCCCTACCTTTGCTACCCTTCACGGAGGTCCTGCAGAAATTATAGAGCATGGCATATCTGGATTCCACATTGATCCCTATCACCCTGAGCAGGTTACAATCAATTTGGTCAACTTTTTTGAACGGACCCAGAGAGATCAGAGCTACTGGAATCAAATATCTGATGGAGCACTTGCACGCATCCATCAAAAGTACACTTGGAAGATATACTCAGAGAGGCTTCTGTCATTAGCTGGGGTTTATGGGTTCTGGAAACATGTAACAAAGCTTGACAGGCTAGAGAATCGACGATATTTGGAGATGTTCTACGCTACAAAGTATAGTGATCAGGTGAAGATGATTCCTTTAGCTGTGGATGAGGATTGA…
LOC108204457	GCTCGGTTAAATCGGAGTATCCAGAGTGAATTTAATTGACCGTAGTTCCATACAATACACACACATATAATCAAATTTGGATTCTCCTTCTTCGTTATGTACATACAAATCAAACAGCAAAAATCAAATATTTATTATTATCTCTCTCTCAATCTCTCTCCCTCTCCAGAGAGATCTAATTGTGTGTAAATAAGATTGTATTGTGATCGGAAATTGATGACGACGGAGCAATTAACTCCGGGCGGTGGAGGACCGCGGTACGTGCAAATGCAACCGGAGCCGGGGACGTCGATGATGTCGTCGTTCTTTTCGTTCCGGCAGAGTCAGCCTGAGTCAACTCGGATTTTTGACGAGTTACCTAAAGCTACGATCATACAAGTGTCTCGTCCTGATGCTAGC…
LOC108194075	TTTACACACACAAATCTCTTCGACTCTCTTTAGTGTTTTACAGTATATAAATACTCTCGAGTAGTAGTATCAAGCTAAGAGTAAACCATGGGTGTAGTAACCAGAACTGCGGAGGCACGTTCGTCAAAAATGACAGCAGCTCAGCTGTACAAATCCATGTTCATTGACATGGATAAAGTCATGCCTAAAATTTTACCCCAGATCTTCAAGTCCGTTCGACTCGTTGAAGGTGACGGCGGTGTTGGAACAGTCAAGGAAATCACTTACGGTGAAGCTGTGAAGGCGACGACTATGATCCAGAAACTAGTTGAAATGGATCCCGAAGCAATGACATACACAAAAGTGATCATCGGAGGTGACGTGTTGATGGGCACACTGGAATCAGTCGCTTATCATTCG…
LOC108198435	TTTACACACACAAATCTCTTCGACTCTCTTTAGTGTTTTACAGTATATAAATACTCTCGAGTAGTAGTATCAAGCTAAGAGTAAACCATGGGTGTAGTAACCAGAACTGCGGAGGCACGTTCGTCAAAAATGACAGCAGCTCAGCTGTACAAATCCATGTTCATTGACATGGATAAAGTCATGCCTAAAATTTTACCCCAGATCTTCAAGTCCGTTCGACTCGTTGAAGGTGACGGCGGTGTTGGAACAGTCAAGGAAATCACTTACGGTGAAGCTGTGAAGGCGACGACTATGATCCAGAAACTAGTTGAAATGGATCCAGAAGCAATGACATACACCAAAGTGATCATCGGAGGTGACGTGTTGATGGGGACACTCGAATCAGTCGCTTATCATTCG…
LOC108198435	TTTACACACACAAATCTCTTCGACTCTCTTTAGTGTTTTACAGTATATAAATACTCTCGAGTAGTAGTATCAAGCTAAGAGTAAACCATGGGTGTAGTAACCAGAACTGCGGAGGCACGTTCGTCAAAAATGACAGCAGCTCAGCTGTACAAATCCATGTTCATTGACATGGATAAAGTCATGCCTAAAATTTTACCCCAGATCTTCAAGTCCGTTCGACTCGTTGAAGGTGACGGCGGTGTTGGAACTGTCAAGGAAATCACTTACGGTGAAGCTGTGAAGGCGACGACTATGATCCAGAAACTAGTTGAAATGGATCCAGAAGCAATGACATACACCAAAGTGATCATCGGAGGTGACGTGTTGATGGGGACACTCGAATCAGTCGCTTATCATTCG…
LOC108210856	AGAAAGAGTTATCCCGCGGAAAATGAGGAACTCGAGGACAGTGGTTTTGACCTGAGGTCAATTGTTTTGACTCGTCGGAGCTTCTTCGCCGGCAACTCTAGGCACCGGAGACTAATCACTGGAAATTGAAAATGCTTCAAAATGTACCTATTCAGTCGCCAGCTAGGCTTGGCTTGCCCAATCCGAATTCACCTGCTCCTCCCAAATTCTCGTCTTCGCAAATTGTCCAATCTCATCACTCTCATCAACAATCGAACACCGCGGGTGCGGTTGTTACAACTACCTCTCCGGCATTGCTCCCGCTCCTTCCCCCACTCCCTAGAGCTCAGTCTCTTCTTGTACAGATGGCATCCCTAGCTTCGAGACTCTTTGAAGTTTCGCCTAGTCGTGCGCATTGGT…
LOC108210856	AGAAAGAGTTATCCCGCGGAAAATGAGGAACTCGAGGACAGTGGTTTTGACCTGAGGTCAATTGTTTTGACTCGTCGGAGCTTCTTCGCCGGCAACTCTAGGCACCGGAGACTAATCACTGGAAATTGAAAATGCTTCAAAATGTACCTATTCAGTCGCCAGCTAGGCTTGGCTTGCCCAATCCGAATTCACCTGCTCCTCCCAAATTCTCGTCTTCGCAAATTGTCCAATCTCATCACTCTCATCAACAATCGAACACCGCGGGTGCGGTTGTTACAACTACCTCTCCGGCATTGCTCCCGCTCCTTCCCCCACTCCCTAGAGCTCAGTCTCTTCTTGTACAGATGGCATCCCTAGCTTCGAGACTCTTTGAAGTTTCGCCTAGTCGTGCGCATTGGT…
LOC108205505	TTCTTTTAAAGTTGTTTCCTTCTGTTTCGGTTTTGGTTGTTGGGAGTGGAGTTTGTTTATGTGGAGTTTCTTTGAAGGGATTGGTGCAGTTTGTTTGTTTTGGTTTTAGGTAATATTTATGGATTAGTTGTTGGGATTCAATGTAGTATCATATAATTCAGTATTTTGCTTTCTACAATTTGTATAAATATAAATTTTGTTTTGTTCTTTCTCCCACAAGGATTCCTCTAAGCTGCCGCAGGTCTTTGTGCAGTTGAGTAGGTGGGCCTTCAGCGTAGAGTGATATATCTTCTTTCTGAGGAATTCTAATATGCAGACACCAAAGACAAGAACTGGATCCTTGGAAGTGCCTCAAAGGTCATCGCCAGCTACACCCCGAAGTAATAAGCAGCAGAAGAC…
LOC108194170	GTTAATATTGTCCATGTAAGTATATATATTTTGTGTGCAAGTATATATACATTGAAGTGTGTGTTTATTTGCTTGTCCAAAAACAAACTTAGAATCAAGACAGCTTCATAACACAACTCTCCTCTGGGCATTTCTTGAATTGGGTTTCAGTTTAAATTCTTACAAGTCTAAAATCTTGGCCCAAATAATGTAATTGAGGACTTTCCTTTTGTAGCTGTGTATATATCTATATATACATACACATGTTTGATTGTGTGATAGCAGCCGCATAGGGGTTTATAGAAATGCATCTAGGTACTTGTCAACTCACTAAATCTGGCTCCGCCATGCCCACTTCAAGTGGCTCCGCCGGAGATGCAGTTTCCGACCAGTTTCCGGTGGGTCTCCGGGTGCTTGTTG…
LOC108205205	CATAATACCATACATATGTAGACAGTAGACACGCAACGTATCGTCGTTATATTGGTATTGTATTCCATGTGCATAATTCTTATATAAATAATTCCTTTTACTGGATCATCCATTCATCTCATCTTTCTATCCGTTCTCATTTGCTTTTCTCTATATATTTTCACTTAAGAGTATAATCTCTTTGCTTGCTGGCCTCACTTCCTCCATTTCAGAGGAAGAAGGAGATGGCCACTGCTTGCAACAGGAACGGAGACAACAACAGCATTGCTGCTCAGGACCACGAGTCGAGCTCAGTGAATAAATATGGAGGAATAGTGCCAAAGAGGAAGCCTCTGATCTCGAAGGATCATGAACGGGCCTTCTTTGATTCTGCAGATTGGGCTCTATGCAAGCAAGGTG…
LOC108204449	TAAATGGATATATAAACCCGAGAGACTGAGAGAGCGAGAGGAGACGTACTGTGACAGACGCGGCAGTTAGGGTTTCCCGCTGATCCACCACTCTAACTTAATTCTCAATCTCCCCATCACTTTTAGAGCTCTGATGGTTGATCATTCTCCTTTGCAGCTTGTTAAGGTGTACCACTTAAATACTGATGAGAAGTGGGATGACCAAGGAACTGGGCATGTTACTGTTGATTATCTGGAGATCAGGAGAACTTGGCTTGTTTCTTGTTGATGAAGAGAAGAATGAAACATTACTCTTGCAACGTATTAGTTCAGAAGACATATACAGAAAGCAAGGAGAAACAATAATTTCTTGGAGAAGTCGGGAGCGTTCATCTGAGATAGCTCTTAGCTTTCAAGAAA…
LOC108204449	ATTAAAACAAGATGCAGGTGATATTACAGTTACAAGCCTACTTGATTCGCTCAGATGAGATTTTGAAACCGGGTGGTTCAGAAGTTTATGATTCATTCTGTATGATAAAAGGTGCTTTTCCTGCATGAGTTTTGTTGTCTAATCAAGAGCTTGCAAACAGTACATCAGTTCAGATTTCTAAGGGATCTCATAAATGAAGGCATCATTGACGTCATTGCCGGCATTCTGCAGAGTGAAGACAAAAGGCTTAGATTAACAGGACATCCTTATTCTTTTTCTGAATCAAGATCCAAACCTTACAATCTGTTCTCTCACTCGGCAAAAAGGTGTTCCTCTTGTTGGGCTTCTGGTCAAAGGCATGCTTACAGATTTTGGAGATGATATGCACAACCAGTTTGT…
LOC108204449	TAAATGGATATATAAACCCGAGAGACTGAGAGAGCGAGAGGAGACGTACTGTGACAGACGCGGCAGTTAGGGTTTCCCGCTGATCCACCACTCTAACTTAATTCTCAATCTCCCCATCACTTTTAGAGCTCTGATGGTTGATCATTCTCCTTTGCAGCTTGTTAAGGTGTACCACTTAAATACTGATGAGAAGTGGGATGACCAAGGAACTGGGCATGTTACTGTTGATTATCTGGAGAGATCAGGAGAACTTGGCTTGTTTCTTGTTGATGAAGAGAAGAATGAAACATTACTCTTGCAACGTATTAGTTCAGAAGACATATACAGAAAGCAAGGAGAAACAATAATTTCTTGGAGAAGTCGGGAGCGTTCATCTGAGATAGCTCTTAGCTTTCAAGA…
LOC108204449	TAAATGGATATATAAACCCGAGAGACTGAGAGAGCGAGAGGAGACGTACTGTGACAGACGCGGCAGTTAGGGTTTCCCGCTGATCCACCACTCTAACTTAATTCTCAATCTCCCCATCACTTTTAGAGCTCTGATGGTTGATCATTCTCCTTTGCAGCTTGTTAAGGTGTACCACTTAAATACTGATGAGAAGTGGGATGACCAAGGAACTGGGCATGTTACTGTTGATTATCTGGAGAGATCAGGAGAACTTGGCTTGTTTCTTGTTGATGAAGAGAAGAATGAAACATTACTCTTGCAACGTATTAGTTCAGAAGACATATACAGAAAGCAAGGAGAAACAATAATTTCTTGGAGAAGTCGGGAGCGTTCATCTGAGATAGCTCTTAGCTTTCAAGA…
LOC108204449	TAAATGGATATATAAACCCGAGAGACTGAGAGAGCGAGAGGAGACGTACTGTGACAGACGCGGCAGTTAGGGTTTCCCGCTGATCCACCACTCTAACTTAATTCTCAATCTCCCCATCACTTTTAGAGCTCTGATGGTTGATCATTCTCCTTTGCAGCTTGTTAAGGTGTACCACTTAAATACTGATGAGAAGTGGGATGACCAAGGAACTGGGCATGTTACTGTTGATTATCTGGAGAGATCAGGAGAACTTGGCTTGTTTCTTGTTGATGAAGAGAAGAATGAAACATTACTCTTGCAACGTATTAGTTCAGAAGACATATACAGAAAGCAAGGAGAAACAATAATTTCTTGGAGAAGTCGGGAGCGTTCATCTGAGATAGCTCTTAGCTTTCAAGA…
LOC108205467	GGCCCTCCACTAGCTGGAAAGTATGACATGGGAGCCATATGTATGCAAGAGCATTCTGAAAGGCTTCAAAGTCTTGTGAATGACGCCATAGACAAAGGAGCTGAGGTTGTTTGTCGCGGAACTGTTGGCAATATAGGTGAAGGAGCTGTTGATCAGTACTTTCCTCCTACTGTCATTGTGAATGTAAACCATAAAATGAAGCTGATGCAGGAAGAGGCCTTTGGACCAATTATGCCAATAATGAAATTCAGCACCGATGAAGAAGTTGTCAGGCTCGCAAATGACTCAAGATATGGCCTTGGCTGTGCTGTCTTCTCTGGCAGCAAGCACCGTGCAAAGCAAATAGGTTCACAGCTGGAATGTGGGGTTGTTGCGATCAATGATTTCGCTTCAAATTAC…
LOC108204654	GAAAATAAATTCCGTTGTGGTGGTTAAGAAAAAGAAAGTGTGACCCATCAAGAACCCAACGGTTGCTACTCTTTTCATAATTAGTTTTATTAAATTCCCCATTATTTCATTTGTTCCCATACCGTGTGACTGTGTGAGAGAGAAAATATTAAAAAGAAAATAAAAAATAAAAAGCAGCCATTAAGCTTAGCTAACAAGCTCAGCCTTCATCACATTCCCTTTTTGGTCACACACAGTTACACACAGTTATAAATGGAATGATTAACTGATTCATAACAGAATCAGCCGCACCTATACATACAACTGCACACCTATACATACAAGTGTTTGTAAATGGAGAATAAAACAGAGGAGCTGATAAAGAAGATCCAAGTGTTGGAATCAGAGCATGAGCAACTC…
LOC108204654	GAAAATAAATTCCGTTGTGGTGGTTAAGAAAAAGAAAGTGTGACCCATCAAGAACCCAACGGTTGCTACTCTTTTCATAATTAGTTTTATTAAATTCCCCATTATTTCATTTGTTCCCATACCGTGTGACTGTGTGAGAGAGAAAATATTAAAAAGAAAATAAAAAATAAAAAGCAGCCATTAAGCTTAGCTAACAAGCTCAGCCTTCATCACATTCCCTTTTTGGTCACACACAGTTACACACAGTTATAAATGGAATGATTAACTGATTCATAACAGAATCAGCCGCACCTATACATACAACTGCACACCTATACATACAAGTGTTTGTAAATGGAGAATAAAACAGAGGAGCTGATAAAGAAGATCCAAGTGTTGGAATCAGAGCATGAGCAACTC…
LOC108204654	GAAAATAAATTCCGTTGTGGTGGTTAAGAAAAAGAAAGTGTGACCCATCAAGAACCCAACGGTTGCTACTCTTTTCATAATTAGTTTTATTAAATTCCCCATTATTTCATTTGTTCCCATACCGTGTGACTGTGTGAGAGAGAAAATATTAAAAAGAAAATAAAAAATAAAAAGCAGCCATTAAGCTTAGCTAACAAGCTCAGCCTTCATCACATTCCCTTTTTGGTCACACACAGTTACACACAGTTATAAATGGAATGATTAACTGATTCATAACAGAATCAGCCGCACCTATACATACAACTGCACACCTATACATACAAGTGTTTGTAAATGGAGAATAAAACAGAGGAGCTGATAAAGAAGATCCAAGTGTTGGAATCAGAGCATGAGCAACTC…
LOC108204654	GAAAATAAATTCCGTTGTGGTGGTTAAGAAAAAGAAAGTGTGACCCATCAAGAACCCAACGGTTGCTACTCTTTTCATAATTAGTTTTATTAAATTCCCCATTATTTCATTTGTTCCCATACCGTGTGACTGTGTGAGAGAGAAAATATTAAAAAGAAAATAAAAAATAAAAAGCAGCCATTAAGCTTAGCTAACAAGCTCAGCCTTCATCACATTCCCTTTTTGGTCACACACAGTTACACACAGTTATAAATGGAATGATTAACTGATTCATAACAGAATCAGCCGCACCTATACATACAACTGCACACCTATACATACAAGTGTTTGTAAATGGAGAATAAAACAGAGGAGCTGATAAAGAAGATCCAAGTGTTGGAATCAGAGCATGAGCAACTC…
LOC108204328	GTTATGATTTAAACAATCCAATGGAAACACTTAGTAAAACTTCAACTTCTGGATTAGTCAGCATATATGCCGATGTTGCTTGTGAGAAGGCCCGGTTGTTTTATTAGGAAAGCCGTGTACATGTATTGAAGAATGAAGTTGATAATAGTGTTAAAATGGCGGAACTGATTGAGTACAACTTAGAAGATGTTGATGCTGCTATACTAGCTGTTCGTGTTGCTGTGGAAAATGGTAAGAGTTGGGAAGATCTAGTTCGCATGGTAAAAGAGGAGAAAAAGTCTGGAAATCCTGTGGCTGGCCTCATTGACAAGCTCTACCTTGAAAAAAATTGCATGACACTTCTTTTGAGTAACAATCTCGATGAAATGGATGATAATGGAAAGACACAACCTGTAGATA…
LOC108204329	CGAAAGAGGGCGAATCAGTCTCTCCACCAAAAAATTAGAACCTTCTCCCGGTGACATGATTCGCAACCCCAAGCTAGTTTTTGAGAAGGCAGAGGAGATGGGCCAGATATTTAGGGAAAGAATTGCTCAGGCGGAAGCCATGGCTCGTGCTGATATGCTGAGACTGCAGCCTGAGATTACTCTGCCCTGATCCCCTCTTAAGTCCTCTGGCGTTGGAAGCACCTCCAAAGGGTCTGGATTTTGAATGATATACCTACAGTTGACTAGTATAAACAGAACTTCTGTAACATTTATCAATATAAAAAGTGTGCTTTTTAATTCTTTGCTACTATCAACCACAGTAATGCCTTTGAGGGTGATTTAAAGAATTGAATGAAAGGCTTACACGTGAAATCAAAA…
LOC108205400	CTTGAACTTGTTCAGTATTGATTTTCTTGCAATGTTATAAAGTTCCCATCTTTCTTAACTACACTCATTATTTTTAGCTTTTTTGACTTTTTAGCTTGGTTAATTGTCATTACTTTCATTTTTATGTTACAACATAACTCAAGTTTGTATTTTTGAGTCTATTGTTATAGTGTTGTTAGATTCCATTTTGCATATTCTTGCTGTATGATCCTGATTTGTGAGCACTGTTTGCAAGAAGTAGTTGTTGGGATGGCGTAATGATTGAAGTTTGGTGCAGGGTATGGAGATAAGGGGAAGGTTGGTACATTAGGATGAAGTTCGATACGTGGCGATGCGATTTTTCAGGATTGGTGGTTAATATTGCGTGAAGCTATTGTTTTTGTGAGAATTTGTTAGAAT…
LOC108205206	CCGAGCACCCCATAGGCCATAAGTGATGTTTCGTAATATATTTTCTTTTGGTAATTGATGGGGTTCCGTTGTTGATAACATAATAATAGCTCCTACTCAACACAGCCATGGCGCGTGGATTGATACTCTATACTCCAGCCAACACCTCTTCCCAAATAATCCTAACCTCTATTTCTCGAACAACATTCAAATTTACAAACACCCCTCGAATTACACGGCGGCCCATTACCTTAAACTGCAGTTGCACCGATGACCCAGTTGACATTTCGAGCTACACACAAGTGTTTGCCAAGAGGATGGCCATGGCTGGCCTCCACCCTCATCATCGTATAGCTCTGGGTGTCTCTGGTGGGCCAGACAGTATGGCTCTGTGTGTATTGGCTGCTCATTGGAAAAAAC…
LOC108204701	GTATGAATTCTTATTGCCTTAAGAGCTGGAGCAGTGGAGATCAAAACCTGATTGCAGATTGCTGACACATTGTATAGCTCTCAAGAACACTGCAGTCTGTAGTTCTCCACTTCTGAGGCAGGCTCTCCGTCGAGTAAACAATCGATAGGGGGAATTGTCAGTGTTTCTTGATTTCCATATGTATTCCAACAGAAAGGATCATCCACCAGTTCCCCTTCTTCTGGAAGCAGCTCTACTTCTGACATGGTTATGTTCGTGCAAGGCACAGTGTCGCTGCAGGCAAAATGGATTGGAGGGCTCCGGACATCGTAAGTTCCCTTAATGTTCCTGAATGATATGTCTCTCACGTATACAGCTGAAGTCTGGTTTAAGCAGGCCTTGTTTGAGCAGTAGTACTGG…
LOC108202655	CAAACAGTAAATACTTGCAGTTAACAATGCTCTGCTCTGTCTATACATACATTGCACAGAACAAACAAGTTGATTAAATTATTCAGTGCCCCTTATTTATTTCTGCACCTAATTTTCCTCTCTTCATTCTTGCCTATATATTCTCTTCAATTTTTCATTTCCAGCAATCTTTCTCACTCTATATTATAAAGCTGCAATTTTTATTTTCCAACCTCTAATTTATTCTCCTCCCTTAAAGTTTGTTTTTTTCTGTGTTTTTTTACTTGTTTCTTTTGAAATATGATGATTATTGGTGCAAGAAATGTAAAGCTGGGATCTTTTTGTTAATTTAGTTGTGGGTTTGTAGTTTGGATTGTTGTTGTTGAGCTAAATTTGTATTCTTTGTGTGTTTGTTTATTT…
LOC108204371	CATGTAAATAGAATACGGACGCGTCTTCTGATTTCTACCGTCTTCACAAATTGGTCTGAGCCAATTAAGACAAAGCTGTTACACTCGCTCTATATTCTCGCGTTATTGTAAGTTCATCCACATATACATACAATAATCTGTATCTATTTTTCATTATGCTGTATCTAATTACTATGCTCAAATGACTAGATTATCTACTTCGATTCACTGTAGCTGAAGATCAGCTGCGAATTTGTAGTTATACGTGTTAGTTTTTGTGATTTGATTGTGTTTAAGACTTGTTGTTTGTGTTTTTGTGATGCGTGTCATGTGAATGCGCATTGTGTTGTTTTGATCTGATTGGAATTGTGTTACGTTGTGGTGGAAGTTAGGTTTTGTTAGTCTGTTGATTACTGCATT…
LOC108204371	CATGTAAATAGAATACGGACGCGTCTTCTGATTTCTACCGTCTTCACAAATTGGTCTGAGCCAATTAAGACAAAGCTGTTACACTCGCTCTATATTCTCGCGTTATTCAAATTTTTAGGTGACATTGGCATACTGCTCACCATGGTTTAAAATAGCTGGATGATCCTGGTTTTACACACTAGGAACCATATCTGGCCTTAAAGCTTTAAAAGTGTCCAGATCTTGATACAGAAGGGCAATTTTCTGAAAGACATCAATAAGGAAAAATGATCGACAAGTCACTTTTTTTGACCTACTTTTACCTGCTAGTCTACATTCTGCTCTCGTCTGGAGTTATCCTCTACAACAAGTGGGTTCTCTCTCCGAAGTACTTCAATTTTCCATTTCCTATAACACTTA…
LOC108205345	TATACCCAATCACACACAAAAACTCCCTCTTAAACCCTACACTCAGCTCCCCATTTTTCATCACCATTTGCAGCACCCCTCCATGAACACCCAATAACACCTTGAAATACACACACAAACACAACATCAACTCACCCATTTCTTGAAAATGTCAGCAGCATCAAGAGGCCTAATATCTCGCTTAAGATCTCTCACACTCTCCCCAAAGTCTACACCTTTATACACCGCTACAACATCAAGAACAGCAACTTTTACACCGACCCAGTTGAGATTTTTCAGCTCCGAGACTTTAATTGATGATACCCACGAAAGATCTGGAGTGATAGAGCTGAAGCAAGGTGTTATGAAGCCTAATTCAAGAAGAACAGGCTTGATTGCGGTGAAATGTGGGATGAGTGC…
LOC108204762	ATGGTCTTGAATATGCCACCACCCACATTCACAATCTCATCAAATTCCCATTTTCATGGAGGCTGAAGTTAGTGTAGTTACTCTCAAGTTGCAATCTTGTACTCTGCTTATAACATAGCTTTTATCTTCATGCCCCTTTGTCAAGCACTTAAAGGTGTTTGTTTTAATGCTTCAATGAATCTGAAAACAAATATTAAAAGCTGTAGCTTTTCACAGATGATATTAGTATCACCATTGAGTTGCCCATGTAAAAGGGTTGCTTGTCCTTTCTTTGCTAGTTTTTACAGTAGGAAAATATTCATTACCCACAAGAGGAAATTGGGTGTTACTCGTTTAGTTAGTCGGGGTGCGAAATATAGTCTTTCTGGTGATTTGGATGGTAAGGGCTTGTCTCAAGAG…
LOC108205980	TAAGATATAATTGCTTCCGCAAAATTAGGGTTCGGATAAAAAGAGAAGATTGATCAGCAAAGTGAAGATTTACAAGTCGTGCCTTCAGTTTGATGAAATTGGAGAAAAATGGCAAGCTATTCCAAAGGAGCCCCTTCCAATGGGTCTGTGTATGTTTGTAACTTGCCTCCTGGGACAGATGATAACATGCTAGCAGAACATTTCGGCACACTGGGGGTGATTAAGAAAGACAAACGGACTGGCCGGCCAAAGATATGGTTGTACCGAGACAAGGTCACAAATGAGCCAAAGGGAGATGCTACAGTTACCTATGAAGATCCGTATGCTGCATCAGCTGCAGTTGAATGGTTTAACAACACGGAATTCCATGGTGCTACCATTGGGGTTTTCATGGCCGAG…
LOC108205166	AATATGCAAACCGCTCCGGCCGTGCGCTCTCAACGGTCAAGATGCAAACCCCCAAAATATCTCAAACCCTAAAATCGAAGGCGGACACGATAATTCCTACAGTGCGGACGCACCCGTAAATTTATTACATTCAGTTGTTGTATAAATACATAACCAGCCCGTATCAACCCCTTCATCTCTGTCTCTCTAAACCCTATTCGTTTTTAGGGTTTTTCTCAAGCCGCTCTTCTTCTAAACCCCTTTCTCACTGACACTCATGGGTAAATCTGCAAAGAAATCAGCCACTAAGGTTGCTGTAGCTCCAGCTGCAGCTGCTACCAAGCCATTGACTCAAGGGAAGAGAGAAGCGGAAGATGTGGCAGAGAAGCAGCAAGTGTCTGCGAAGAAACAAAAGCAAAA…
LOC108204521	TTTTTTTGTATAAATATATAGCAATTGTATGTATCACCCCCTCACTCACCCCCTCTCTCTCTAAACCCTATTCGCTTTTAGGGTTTTTCAGAGGCCGCTCCTTTCTCTTAAGCCCCCTTTGAACCCTTCTCTAATACTCACAGATCTCTGTATCTACCTCATCAAATGGGTAAATCTTCCAAGAAATCAGCTTCTAAGGTGGAAGTGGCTCCAGCTGTTGTTGCTTCTAAGCCATTGAAGAAAGGTAAGAGAGAAGCAGAGGAGGCTGCAGAGCAGGTGCCTGCAAAGAAACAGAAGCAAAACGAGGCAGCTTTGAAGCAAGCAATTGCTAAGAAGCAAGCAGAGGCTAAGGTTACAAAGAAGAGCAAGAAAGTTGAGAGTAGCTCAGAGGATGATTCT…
LOC108204521	GTTTTTTTGTATAAATATATAGCAATTGTATGTATCACCCCCTCACTCACCCCCTCTCTCTCTAAACCCTATTCGCTTTTAGGGTTTTTCAGAGGCCGCTCCTTTCTCTTAAGCCCCCTTTGAACCCTTCTCTAATACTCACAGATCTCTGTATCTACCTCATCAAATGGGTAAATCTTCCAAGAAATCAGCTTCTAAGGTGGAAGTGGCTCCAGCTGTTGTTGCTTCTAAGCCATTGAAGAAAGGTAAGAGAGAAGCAGAGGAGGCTGCAGAGCAGGTGCCTGCAAAGAAACAGAAGCAAAACGAGGCAGCTTTGAAGCAAGCAATTGCTAAGAAGCAAGCAGAGGCTAAGGTTACAAAGAAGAGCAAGAAAGTTGAGAGTAGCTCAGAGGATGATTC…
LOC108204521	TTTCTCGACAAGTTTTTTTGTATAAATATATAGCAATTGTATGTATCACCCCCTCACTCACCCCCTCTCTCTCTAAACCCTATTCGCTTTTAGGGTTTTTCAGAGGCCGCTCCTTTCTCTTAAGCCCCCTTTGAACCCTTCTCTAATACTCACAGATCTCTGTATCTACCTCATCAAATGGGTAAATCTTCCAAGAAATCAGCTTCTAAGGTGGAAGTGGCTCCAGCTGTTGTTGCTTCTAAGCCATTGAAGAAAGGTAAGAGAGAAGCAGAGGAGGCTGCAGAGCAGGTGCCTGCAAAGAAACAGAAGCAAAACGAGGCAGCTTTGAAGCAAGCAATTGCTAAGAAGCAAGCAGAGGCTAAGGTTACAAAGAAGAGCAAGAAAGTTGAGAGTAGCTCA…
LOC108204389	AATACATGGAAGTGTCGCTACAAATCTCTCTAAAATTGGGGGATATAGCTACAGCGTATTATTTTCTAGCTTATATACAACGCGAGAGAGAGAACGAGAGAGAGAGAGAGACGATGTCGTACTTGCTACCACACTTGCACTCAGGATGGGCTGTAGATCAAGCTATTCTCGCCGAAGAAGAACGCCTCGTTGTCATCCGCTTCGGTCACGATTGGGATGAGACTTGTATGCAGATGGATGAAGTACTAGCTTCTGTTGCTGAGACGATAAAGAATTTTGCTGTGATCTATCTCGTGGATATTACTGAGGTGCCTGACTTCAACACTATGTATGAACTGTACGATCCTTCTACTGTTATGTTCTTTTTCAGAAACAAACATATCATGATTGATCTTGGCA…
LOC108207410	ACGTCAATTCTCAACTAAACCTACTCTTTATCTTATGAAGTTTCTGTGCGTCAGTTTTAAAAATGCACACCTAAAATGTTTCTGTAGCGTCGGATCTTTTTACGGCCATCGCTGAAAGTCTACTATTTGCGGCCTCTCTTACCCGACGTACAAGCTGTTTGTAAAAACTAAAAATATAATTAAACTAAATTAATATTTTTACTTAGCTGTAACCCCCAACCATCTTACTTTTATGATGCCCCGACTCCTCTCAAAACTCTTGCGTTCTCTGCACACAAGTCCGATGGGTTCACTAATCGATTCACTGGGTTCTTGATTTGTCACTACGCTTGAGCCGAGCCTGCAGAATGTTTTCTTAATTAAGCTGGTCTTCTGACTAGATGATCTGGTGTATCATAC…
LOC108207410	ACGTCAATTCTCAACTAAACCTACTCTTTATCTTATGAAGTTTCTGTGCGTCAGTTTTAAAAATGCACACCTAAAATGTTTCTGTAGCGTCGGATCTTTTTACGGCCATCGCTGAAAGTCTACTATTTGCGGCCTCTCTTACCCGACGTACAAGCTGTTTGTAAAAACTAAAAATATAATTAAACTAAATTAATATTTTTACTTAGCTGTAACCCCCAACCATCTTACTTTTATGATGCCCCGACTCCTCTCAAAACTCTTGCGTTCTCTGCACACAAGTCCGATGGGTTCACTAATCGATTCACTGGGTTCTTGATTTGTCACTACGCTTGATGATCTGGTGTATCATACTCTTGTTCGTTGAAGAATAATTAGAGGTTTTATAAAGCATCAGCCTCT…
LOC108213058	TCTCGTAATAAGCGAAAGCGGGAGATTAAACGCCTTAATTTGAGCAAAATCGGGTTACTAAACCTCTTACAAATTGCATATATATATGAGGTCTTTTTCTTCCCCAATTTACAGCCCCAGCCCCCCACAATCACCAGCGAAAAACCTAACCCCTGAGATGGCGAAGCGAACCGAGGGGGTGGAGAGGTTAAGTGATGAAGATCTTTTAACCGAGGTGCTTTCCAGACTCCCTGTAAAATACTTACTCCAATGCAAAGCCGTGTCAAAACCCTGGTACTCCCTCATTTCCAGCCCTAATTTCATCAAATCTCATTATCAACGTCATGCTATTACAATCAACCGCGCTGTGGATGATAATAATGAACAAGCTCCTACTCTCATTGTACGCCTTTTCAAAGG…
LOC108205344	GTCAAAGGTCCCATTAGTACATAAATCTTAAACACCCAACCAACTTAGATTTGAATTAGGTCAGCTGTTAATTTTACAATATTAGTGCATTGCTTAGTCTTTGTATGCTGACACATAAATGAGTTGGAATTTTAGCTTTGTGAGGCCACCTTGCTTTTGGCACCAAACTTTAAAAGTCAAGAAGGTTCACAGTTAAGCTTCATGTAGCTTTCTTATCCGCTGAAGTATGTCAAATTTGAATATCCAAAAGTAGTCGACCTCCAATTCATGTTAATTACTGCTGCCTGTTTGCTTCCAGAGAATGCATGATCATATCATGTTACGGAAACAACCTCTCTGCTCCTCGGATTAGGTTAATTAATGTATGTGTATATTTTACCCTCCATGTTACCGAGTAGG…
LOC108204772	CATTGACATACCTTACACAGCATTATTCCTGGTGCCTGATTTTCAAAAGACCATCTTTTGACATTAATAGAATTTTTTTACTGTGTGGTGTTACTGAACTGATCAGAAATGATTGAAGGATACTCACTGAAACCGTAAATGGAAGGTTTTTTTATGCTAAGATTTTTGTTGGGCATTTGCTGTGAAAATTGCGGTTGCTAAATAGGGGATTTTGGTTATTAGTATTTTGTTGGGATCAAAATTGGAAAACTGAATAGTGTTGTTATCCATTATAGACTTTTGGCTTCTTCCTTGCTTGATTGCATTTTGGTCTCTTTCACATTTCACACAAAGCATGAATTATTACCAGTATTGAATTCACCGTCACCATTTATTTTCCCTTTTCTTGTGTGTGTGTTT…
LOC108205402	GATATGCCGTTAGTCCCGGCTCCAGTTTAAGTGTACTGTTTGTATCCAGATATAAACCAACCCCCACAAAATTTAGAAAGCTTATAAACACACGGCCACAAAAAATAGATACAGAGAAAGCTGGAAATTTCACAACTTCATTTCAAGAAGAAGCTGCAGCTCAAATCTTCCTTTGGAGCTCCCAAATGATGGCCGTGTTCCAAAGACTAAAATTGTGTGCACCCTTGGCCCGTCTTCCCGATCTGTACCAATGATTGAAAAGCTTTTGAGGGCGGGAATGAATGTTGCTAGATTTAACTTCTCACACGGGACTCATGAGTACCATCAGGAGACATTGGACAATCTTAAAATTGGCATGCAGAACACTCAGATCATGTGTGCCGTGATGCTCGATACCAA…
LOC108207089	CTAGTCCTTCGGCGTGCGCTGCCTCATTACCTTCTGTTATGTGTGAAATTTGCATTTTCACAGCTACTGCAAATCTTATAATTGATTTTCACATGATTAAACGCACTTCCTTATCAATTATTATTAGCTTCTTTGTTCTATAAATGCCTCAAGTTTTATCTGGGAAGTTAACATCAATGGCGTTTAGAGGATTGATTCGGTCATCGATCTTTAGAAGGCAGCTGCATGTGATATCAAGATCAAGCAGTAACATCAGACCAGCTTCTCCAACTCCCTCAAAGCTCAAACAATACAACATTCCTTTACATGATCGAATGATTCCAGATTTTTATATTCCGATGGTTTTCTTCTATCCCGTCAACTCTAATCACAGTTCAAAAGCAGTCCCTGATAATGTAT…
LOC108222076	CTAGTCCTTCGGCGTGCGCTGCCTCATTACCTTCTGTTATGTGTGAAATTTGCATTTTCACAGCTACTGCAAATCTTATAATTGATTTTCACATGATTAAACGCACTTCCTTATCAATTATTATTAGCTTCTTTGTTCTATAAATGCCTCAAGTTTTATCTGGGAAGTTAACATCAATGGCGTTTAGAGGATTGATTCGGTCATCGATCTTTAGAAGGCAGCTGCATGTGATATCAAGATCAAGCAGTAACATCAGACCAGCTTCTCCAACTCCCTCAAAGCTCAAACAATACAACATTCCTTTACATGATCGAATGATTCCAGATTTTTATATTCCGATGGTTTTCTTCTATCCCGTCAACTCTAATCACAGTTCAAAAGCAGTCCCTGATAATGTAT…
LOC108222076	TGATTTTCACATGATTAAACGCACTTCCTTATCAATTATTATTAGCTTCTTTGTTCTATAAATGCCTCAAGTTTTATCTGGGAAGTTAACATCAATGGCGTTTAGAGGATTGATTCGGTCATCGATCTTTAGAAGGCAGCTGCATGTGATATCAAGATCAAGCAGTAACATCAGACCAGCTTCTCCAACTCCCTCAAAGCTCAAACAATACAACATTCCTTTACATGATCGAATGATTCCAGATTTTTATATTCCGATGGTTTTCTTCTATCCCGTCAACTCTAATCACAGTTCAAAAGCAGTCCCTGATAATGTATCAAAGTCAGATCTACTCAAAAAGTCATTGTCAGAGACACTGTCTAAGTACTACCCTTTTGCTGGTAGGCTGTGTTCTGGATC…
LOC108222076	TACTAGTCCTTCGGCGTGCGCTGCCTCATTACCTTCTGTTATGTGTGAAATTTGCATTTTCACAGCTACTGCAAATCTTATAATTGATTTTCACATGATTAAACGCACTTCCTTATCAATTATTATTAGCTTCTTTGTTCTATAAATGCCTCAAGTTTTATCTGGGAAGTTAACATCAATGGCGTTTAGAGGATTGATTCGGTCATCGATCTTTAGAAGGCAGCTGCATGTGATATCAAGATCAAGCAGTAACATCAGACCAGCTTCTCCAACTCCCTCAAAGCTCAAACAATACAACATTCCTTTACATGATCGAATGATTCCAGATTTTTATATTCCGATGGTTTTCTTCTATCCCGTCAACTCTAATCACAGTTCAAAAGCAGTCCCTGATAATGT…
LOC108222076	ATACATTCTAGTTCAATTAGTGTCGTGGTACCCTCTTCATCATTGGCCCAATGGAGCTATCGTTTGAGCTATCGACCAGAATTGTGATCTTATACAAAATTTTATCACCAAATCAAGACCCACGCACGCTTACAATCAAGAAGCGAAAACAAACATCTTATCAAGGAGAGAAAACAACCTAAAAATACAAGTCAGAAAATTGAAATAGAAACAAACTGAAAAGAGAAGATTACAATAATGAAAAAAGGAAAAGCCATCGGTTTCTATCCACCCAAGACTCAAGAGCTTCTTTTGTATCCTTGGACCTTGGCATATTTGTTGTACCCGCATCCAATCCAAGTTTCACATCGTGTAAATATTAGATAAAAAACGGTGTGATGACTTGATTAGTATTATGAC…
LOC108205141	CATATAAACTTGAGAATACAACCAGTCCTATGGATAAGAAAGCAGAGTGTACATCATACAAAAGGGTGGATGGCAAAGTTGCTGTAATAACAGGAGCTGCAAGAGGAATTGGTGCTGCAACTGCAAAGTTATTAGCTGAACATGGAGCTCATGTAGTGATTGCAGATATACTAGATGAACTTGGATCGAGTCTAGCTGATTCTATTGGAGGTCGCTACATACATTGCGATGTCTCAAAAGAATCTGATGTTGAAGCTGCAGTCCAGTTAGCGCTAGACTGGAAAGGGAAAGTAGACATCATGTTTAACAATGCAGGCATTCCGGGCTTTGGAGGGAGCATCACTAAACTTAAAATGGATGAAATGGCTGCTCTGTTATCAATCAATCTGAATGGGGTGG…
LOC108201205	ATTTGAACTACAATGATGCTTTCTGTTTCTTCAATTTTTGTTCTGATATTTGAAGAGCTCTACCAAATTATATTCCTTTTTATTTATTGTCCCACTGGATTGGAAAGGAGTGCTACAAGAGAGGACCATATGGTAATGATATTTACAGGAAGAATGTGCCTCATATCAGGCTGGAATTTTGTGGCACGACATGGAGAGTGGAGATGCCACAGGTTTACCTTGGCAAAACGAGTTTTCCAAAAAACATTGAAACCTAGCCAGCTTGATGGATGTGCTTTTCTGTACCTAATTATATAAGAGTATATTTCTCA
LOC108201205	ATTTGAACTACAATGATGCTTTCTGTTTCTTCAATTTTTGTTCTGATATTTGAAGAGCTCTACCAAATTATATTCCTTTTTATTTATTGTCCCACTGGATTGGAAAGGAGTGCTACAAGAGAGGACCATATGGTAATGATATTTACAGGAAGAATGTGCCTCATATCAGGCTGGAATTTTGTGGCACGACATGGAGAGTGGAGATGCCACAGGTTTACCTTGGCAAAACGAGTTTTCCAAAAAACATTGAAACCTAGCCAGCTTGATGGATGTGCTTTTCTGTACCTAATTATATAAGAGTATATTTCTCAAGGTCTTTTTGATCAGCTCATTCTACCAATATATGGCATCAAGTTTTCTCGGACATGGCTCTGAAAGCTAAAGTTCCAGACTTTAGAA…
LOC108196404	ATGTTATTACTTGATTTTAAATAAATAACACAAATAATTTATTTTAAATAAATTACTAGATATAGTAATTAACTGATATTTTTATCGATTAAAAATTTTTCGAATACAATCTATTACTCTATTATCTTTAAAAAATATAAAAATAAAGTAAAATTTTCAATTTTCATTATGGTTTTAGGCGGGTTAAGTTTTTGGACAGGCGGACATTTTTTTTTTTGAGAGGGCGGGTTAATATTTGAAGAAGTGAAAACACACTCTCAAAAATTAAAATGTCTACCTATCCACTCTGGACATTTCTCTTTGCCTCTCTTCTAGATCTAGCCAGTTCTCTCTCTCTCTCAGATTTCTTTCAACTGAGCTGTAGATAAAAGTCAATTGGCTTCAATTGAGAGTTAAACT…
LOC108196404	ATGTTATTACTTGATTTTAAATAAATAACACAAATAATTTATTTTAAATAAATTACTAGATATAGTAATTAACTGATATTTTTATCGATTAAAAATTTTTCGAATACAATCTATTACTCTATTATCTTTAAAAAATATAAAAATAAAGTAAAATTTTCAATTTTCATTATGGTTTTAGGCGGGTTAAGTTTTTGGACAGGCGGACATTTTTTTTTTTGAGAGGGCGGGTTAATATTTGAAGAAGTGAAAACACACTCTCAAAAATTAAAATGTCTACCTATCCACTCTGGACATTTCTCTTTGCCTCTCTTCTAGATCTAGCCAGTTCTCTCTCTCTCTCAGATTTCTTTCAACTGAGCTGTAGATAAAAGTCAATTGGCTTCAATTGAGAGTTAAACT…
LOC108206529	TTTCAGTTTATTTTTAATTTTATTTCTAATTAAAATTATTACAGTTTTGGTATTCGAACTAATTTGGATTTGATATCGAAATATCTAAATGTTGGGACTATAACTATTTAACCACATTTGCAAAACCGAATCCATCATAGATTAGAAGCCCTTAATTTGAAATCGAGAAATGGGGACGAGAGCCGACAAGGGCGAAAGGTTGACAGAAGTGGACTTGTTAATTGAGGTGCTTTCGAGGCTTCGTGTGAAGCCCTTGCTTCGTTGCAAATCCGTGTCTAAATCATGGTACGCTCTCATTTCAAGCCCTAATTTTATCAAATCTCATCTTCAACGTGCAATCACAAGCTGTGCTGTAGATGATGAGGATGAAAATAATCTCATAGTTCACTACCATAGACA…
LOC108206529	TTTCAGTTTATTTTTAATTTTATTTCTAATTAAAATTATTACAGTTTTGGTATTCGAACTAATTTGGATTTGATATCGAAATATCTAAATGTTGGGACTATAACTATTTAACCACATTTGCAAAACCGAATCCATCATAGATTAGAAGCCCTTAATTTGAAATCGAGAAATGGGGACGAGAGCCGACAAGGGCGAAAGGTTGACAGAAGTGGACTTGTTAATTGAGGTGCTTTCGAGGCTTCGTGTGAAGCCCTTGCTTCGTTGCAAATCCGTGTCTAAATCATGGTACGCTCTCATTTCAAGCCCTAATTTTATCAAATCTCATCTTCAACGTGCAATCACAAGCTGTGCTGTAGATGATGAGGATGAAAATAATCTCATAGTTCACTACCATAGACA…
LOC108204564	AATGATTCAAAGTACAAACAAGACATTCACATACACTTACACATACATACACAACACTCTACTTGTCCACTCTCTCTCTCTCTCTCTCTACCCTGTAGAGAGATTGAAGATTGCACCCTTCTTCTTGATTATACATCTTCAAACTCAAAACCCATTATAAAAATTTTCCTGCTTATATATGTGTATGTGGCTGTTGTAAATATAAATTGTCTAAAAAAATGGATCTTCACAGTCTTGCAGTGGTTCTTCAAGCTGCACTTAGTCCAAATCCTGATCAACGTAAAGCTGCTGAACAAAGTCTTAATCAGATTCAGTATACACCTCAGCATTTGGTGAGGATGTTGCAGATCATTGTAGATGGGAATTGCGACCCGGCAGTACGACAAGTTGCAAGTATAC…
LOC108204810	CATTTCACACTCTATATATAACTCTAGATCTGACAATAAAAATGAAATAGTCAGCTACTTTTATTATTAATCTCTGTGTACTCACAAATCACAATTCTCTGTGAAGAAAATTTTGCTTGTAAATGGCAATGCCGGAGAAAATGCACGGCGGAGCAGAGATGATGGCCCACTACCAGCCCCAGTGGGTCCTAGACGATCGAGACGTGTTCATTGCGTGGATACGCAGTGAATTCGCAGCTGCCAATGCGATAATCGACTCAATGTGTGATCATCTCAAGACAATCGGCGACGACGGAGAGTATGACGGTGTGATTGGGAGCTTACAGCAGCGGAGAGTCAATTGGTACCCTGTTCTGCATTTGCAGCACTTCTTTTCGGTTTCTGAGGTGGCGCATTCGC…
LOC108204924	GGATGCTTTTGGTTTCTGATAAATGTGAACTCCAACAGTACTTTCATTGGTTAAATGTCTCATCTGCTTTAATTCTGACTTCACACTCAACATCCTCCACTCTCTCTCCCTCTTTCTTATATCATATAGGACTACTACATATGATCTTATCTCTATCCCTTTCCATTTTCTTTTCTCACTAAATTTGGTAAAGACTTATAAAACTTGCTCTGTCTTGTCTTCTGATAATCATATTCTCATCAAGATTCACTCAAGCATACAAGCCTGAATTAACCAGGAACTTCTACCCACACAAAGAACAAGATGAAGGCATGCGCAAGAGACACTTTGCCTACTAATGGCTGGAACACCAGATTTCTTTTTA
LOC108204970	AGCGTATCTGCAAAAATCCTCAAATTCGATTCAGTCGCTTTAAATATTTGGTTACAGAACATATTTCTCTGCATTTTCATTTTCTTTAAATAATAAATTACTTGGTACCCAACACCACAGCAAAAAATTCAGACACAAACTCATTTTTGTTCAAATTTGTACACAACCCACGTTCACTTTGATTGTACAAAAGCAGATTCATCTCAATTCTTACACAATACACACAGTCAAATGTGTTTAGTTTGATTAGCTAAACTCTTCTTTTGTGTTTTGTTAAAACAAAGTGCACCATACTTGTCTGGATTATTCAACTTAAACACTTAAACACCACGCTTGCACACAAAAACACACACACACACAGAGTGTATGATTAGAAGTCTTGTCATTTTATAATCCATT…
LOC108204246	CCCAGCCCCCAATTAGAGAATCTCTCGCTCTCCGTCTTCAGCAAGCTACTCTTTGTCTCAAATTCAGACATGGGAGATAAAATGGTATCCAACTGCAAAGATATTGTTTTAAGAAATTCAGATATTGACACTCTAAAAGGACCATGCTTTCTCAGTGACCAGATCATTGCATTCTACTTCACTTATTTGTCTTGTTCCTTCAACACCAAAACTGATATGCTGTTAGTACCACCTTCCATTTCTCTGTGGATTGCTAATTGTGAGGATACCACTTGTGTTGAAGACTATGTTCGGTCTTGTGAGATGTCGAGCAAGAGGCTTGTCCTTTTTGTCGTAAATGACAATGAGGATTTTGGCGGGGGAGACGGTGGAAACCATTGGAGCATCCTTGTGTATGAT…
LOC108210203	CAATTAAAGGTTTGGGGTCAAGTTTTTAGGCCCAACTTACAACCCGCAGTTGGATTTATAAAAACCCTAGTTTTATCCGAAAATTTGATCACTGAAAACCCTGAAAGAATGGTGATGGGCAAGAAGAATGAATCTGAGAAGGAAGAAGAATCCAATGCTTCCCCTGGAGAAGAAAGGAACAGAACTCGCGGTGAAGCTGAAATTAAGGCTGGCGAGTACCCACCCTTGGACTACAGTCAGGAGGCCAAAGAGCCATCCCCAGGCCGAATGGTTCCCCGTAACGTCCCTCACTCTGACTCCTCTGACTTCTCGGACTTCGAATCCAAAAACGTCCCTGAAACTCAAGCAAACAAATCCGTGCTCGCCAACGACCTCATGTCTGCTTCATCTATTTTGGTT…
LOC108205316	GGCCTAACTCAAAGACTCTTAACCCGAAGCAAGGAATAAAATTTACAAAATTATTTTGTTCTTTTCGATAAATCGCAAATATTCTTTTTCCTCGCCTCCTCTTGTCGGCGATACCTTAAGTCCGGCGAGCACCGTCGGCACTCTTTTTGCCGCCACCGCTAGTACAACTCCTCTTTCTCCATCTACTATGAAGCGTTTCTTATCCACTATTGTCACAAGGCTCCAGCATTGAGAAGATGAAGGCTTCTGGTTCTGATGACGGAAGAGATGTAGCTAAAGTGGAAAAGAAAACAGGCTCTGAGTGGAACGTGGAACTTGATTGGTTTAGTAAGACACTAGAACCAGCTTTGCAAATGTTGAAGCGGGCTCTTCCAGCAGGAAATGTGTTTGAAAACAAAC…
LOC108204017	ATGGCACAAAATAAAAACATTTAGATCCAGACCTATTAAAAAAAGACCCGACCCAAAAGCACCTCCTTTCTCCTCTCCCTCGGCAAGAACATCAAGAAACCATCAATGGCTGCGCTACACCAAACAGTGGTGTTAGCCAAGACTCCTCTCCAGTGGGCCCCCAAACTAACCCACAACACCTCTCTCCTTTTCTTACTCAACTCCAGAACAAACAGACATCATCAGTTCCCGCGCAAAACCTTAACATGTTCCAACCAATACAGCAGCAACAGTGGGAGTACTAGTAGCCACGACAACATTAATAACGGACAGTACTATGAGTACGAGAGACACGCGGCGCAGACGACACAGTTCTCGAGGCCAACAGAGATAGAGTGGAGGAAGGAGTTGTGTAATAGT…
LOC108204017	ATGGCACAAAATAAAAACATTTAGATCCAGACCTATTAAAAAAAGACCCGACCCAAAAGCACCTCCTTTCTCCTCTCCCTCGGCAAGAACATCAAGAAACCATCAATGGCTGCGCTACACCAAACAGTGGTGTTAGCCAAGACTCCTCTCCAGTGGGCCCCCAAACTAACCCACAACACCTCTCTCCTTTTCTTACTCAACTCCAGAACAAACAGACATCATCAGTTCCCGCGCAAAACCTTAACATGTTCCAACCAATACAGCAGCAACAGTGGGAGTACTAGTAGCCACGACAACATTAATAACGGACAGTACTATGAGTACGAGAGACACGCGGCGCAGACGACACAGTTCTCGAGGCCAACAGAGATAGAGTGGAGGAAGGAGTTGTGTAATAGT…
LOC108204017	ATGGCACAAAATAAAAACATTTAGATCCAGACCTATTAAAAAAAGACCCGACCCAAAAGCACCTCCTTTCTCCTCTCCCTCGGCAAGAACATCAAGAAACCATCAATGGCTGCGCTACACCAAACAGTGGTGTTAGCCAAGACTCCTCTCCAGTGGGCCCCCAAACTAACCCACAACACCTCTCTCCTTTTCTTACTCAACTCCAGAACAAACAGACATCATCAGTTCCCGCGCAAAACCTTAACATGTTCCAACCAATACAGCAGCAACAGTGGGAGTACTAGTAGCCACGACAACATTAATAACGGACAGTACTATGAGTACGAGAGACACGCGGCGCAGACGACACAGTTCTCGAGGCCAACAGAGATAGAGTGGAGGAAGGAGTTGTGTAATAGT…
LOC108204017	ATGGCACAAAATAAAAACATTTAGATCCAGACCTATTAAAAAAAGACCCGACCCAAAAGCACCTCCTTTCTCCTCTCCCTCGGCAAGAACATCAAGAAACCATCAATGGCTGCGCTACACCAAACAGTGGTGTTAGCCAAGACTCCTCTCCAGTGGGCCCCCAAACTAACCCACAACACCTCTCTCCTTTTCTTACTCAACTCCAGAACAAACAGACATCATCAGTTCCCGCGCAAAACCTTAACATGTTCCAACCAATACAGCAGCAACAGTGGGAGTACTAGTAGCCACGACAACATTAATAACGGACAGTACTATGAGTACGAGAGACACGCGGCGCAGACGACACAGTTCTCGAGGCCAACAGAGATAGAGTGGAGGAAGGAGTTGTGTAATAGT…
LOC108222226	TTGCCGACTGGGCTTTACATTCATCTTTGGTCCAAACCACATGTCCTACCAAGCACTACCAACCATAATATACTCCAAAACCCAAACCCTCGTTTAACTACTCTCTCTCTCTCGGTCTCTCTCTCGCTTAAACCTCTTCCCGCCGTCGGCCGGAAACACATTACTCTCCGGCGACAATGGCGGCGCAATCCCTCCGTTTCTCACTCTCTCTCATCTCTCCAACACCAACAACCAAACAAACCCAAGCGAGCCTCATCTCTCCAAAACCCTACTTCCGCATTTCGAAACCCATCAAATACTCTCCGATCCGTTCAGAACTCTCGGCGCCGGCAACCAAGCCGTTAGTTTCTAACGGCGCGGTGGTTCTCAAGCCAAGCGCCAATGACCTAGAGCTAGGCC…
LOC108203676	AACTACATGAGGTCACCTTTGAAGTTGTTGAAAGTTGCAGAAATTATGCACATGAACTTAAATAATATGAAATATATATTCATTATGAATCTATGATGCAAGCTGCTACAGCTGAATGAGTGATGCAGTTCTAAATACTACAATCAATCAAGATAGATCTCTAACTAACCATTATTCCTCAAGATTTTCTAACTAAATATCTTTATGACTCCATCTGTCATTCTCTGATTTAATATCTATGTGTTAACTGTTATTTCCCTGAGTTGCGTCCTTCTGTCTTGCAGTTTCCTTGTAGTTTCACTAACCTCATTCCCTTCTTGATTGAATTGCTTTTGCTTCCGGTCTGTAGCATATACATTATCGGTTGCAAGTACAGAACTATAGCCTGCATTAAGTGTT…
LOC108203490	TATATATTCCTCTTCGACTACTAGACCAGCCCAACACTTGGATCGAGAAATTCAGAAATACACACACATACAATCAGCTGTCTGTCCACCAAACCCAATCAACTGAAATCCCTCCCTCTAATTCACTCTGCGCTCAGCATCTCTTTTTCAACTCCAATTTCTAATCTCCGATTCGCCTGCCGGAGCTCCGCCGATCCGATCCGCTCCGCCGCCGATTCTCCCGTCGGATCTCCCCTGCTCCGGCTAGTTCATGGAAAATTAGCAACCACAAGTTGACCAGTTGATAGAATACAAATGGGGACTGAAGATCCTAGCCGTAAAAATTTCCCGTACAGGCCTGCTGCATCACCATTCTCATCGCCGCAAAGTACAATGCCTTTCTTATCATCTCCTCCAGTG…
LOC108204710	ACCACCTTTCTATTTCCCTTCAGCTGCGTATGCCTTTAATTTATTTTTCTTTTCTCTCTGCAGTTTGTTGCCGAAATCGAGCGCCTTCCCATTGTCCCCTTCCCTCTCCAAACTCCGCTAAAAAAGAATGGAGAAACAAGAGTGCCTCCGCATTCGAACCTTCCAGAACATTCCAACACCCGAGGAATTCGCTTCTCAAATCGAACTCAGAAACGTCCCCGCTGTGTTTGTTGGATGCGTTAAGAATTGGAAGGCTTTTACTCTCTGGAATCCATCCAATGGCGGCCTTGACTACTTGCAGGGACGAGTGGGGTCATCAGTTGTGGATGCTATGCTATCCAAATCTGCACCAGTATTTTATGGTGATATCAGAAGGCATGATAGGGTTCCATTGCCCTT…
LOC108204710	ACCACCTTTCTATTTCCCTTCAGCTGCGTATGCCTTTAATTTATTTTTCTTTTCTCTCTGCAGTTTGTTGCCGAAATCGAGCGCCTTCCCATTGTCCCCTTCCCTCTCCAAACTCCGCTAAAAAAGAATGGAGAAACAAGAGTGCCTCCGCATTCGAACCTTCCAGAACATTCCAACACCCGAGGAATTCGCTTCTCAAATCGAACTCAGAAACGTCCCCGCTGTGTTTGTTGGATGCGTTAAGAATTGGAAGGCTTTTACTCTCTGGAATCCATCCAATGGCGGCCTTGACTACTTGCAGGGACGAGTGGGGTCATCAGTTGTGGATGCTATGCTATCCAAATCTGCACCAGTATTTTATGGTGATATCAGAAGGCATGATAGGGTTCCATTGCCCTT…
LOC108204404	CCAATAATAATGCTCAGAAATATAATGCAAATCAAATTGTCTGTGTTGGTCCCTGCCACCCATACTTCTCCCTTAAGCAAATTCCAGAAAGTTCCATTAGACAAGAAACTTCATTTATGCCAACCACCCTTCGTTTCATTACTTCTAGGAACTTTCTCACCTTCTTAGAACTTTCAATCTCTAAATTTTATTTCCCCTTATTTTCTTTTAATTGACTTTATCAACCACCTTTCTCAAATTAGAAAGTGTTAGTTACTAAAATAGATTCTTTTTCAGTTTGGAGATGTTGGAATGACCATCTTCAATTTAAAAACAGAGTGATTTGGAAGGAGCCATCTTTCTCATTTGGTGATTACAATCATCATCTTCAGACATTTATATAGTTACCAAAGTTTCAAT…
LOC108204404	CCAATAATAATGCTCAGAAATATAATGCAAATCAAATTGTCTGTGTTGGTCCCTGCCACCCATACTTCTCCCTTAAGCAAATTCCAGAAAGTTCCATTAGACAAGAAACTTCATTTATGCCAACCACCCTTCGTTTCATTACTTCTAGGAACTTTCTCACCTTCTTAGAACTTTCAATCTCTAAATTTTATTTCCCCTTATTTTCTTTTAATTGACTTTATCAACCACCTTTCTCAAATTAGAAAGTGTTAGTTACTAAAATAGATTCTTTTTCAGTTTGGAGATGTTGGAATGACCATCTTCAATTTAAAAACAGAGTGATTTGGAAGGAGCCATCTTTCTCATTTGGTGATTACAATCATCATCTTCAGACATTTATATAGTTACCAAAGTTTCAAT…
LOC108204650	CTTCTATTTCAGCAGATTCGAGTTTCATACCGCCATTGGTCTACGCCTTGATGGGAAGTTCGCGAGATTTGGCCGTCGGGACGGTGGCCGTGGCCTCACTACTGACAGCTTCAATGCTGGGAAAAGAAGTGGATGCAACAGAGAACCCTAGTCTTTACCTTCACCTGGCTTTCACAGCCTGTTTCTTTGCCGGGGTGTTACAAGCCTCTCTGGGCATATTCAGGCTGGGATTCATAGTGGACTTTCTGTCGCATGCAACAATTGTTGGATTCATGGCAGGAGCCGCCACTGTGGTGTGCCTGCAGCAACTCAAAGGGATTCTTGGCTTGGAACATTTCACTCGTTCCACTGATCTTATTTCTGTCATGCGCTCTGTTTTCTCACAGACTCATGAGTGGA…
LOC108205230	ATCAATTGCCAATTAGGCAAACCGTCCCTTTAACTCCATCACCACTGGTCACTACAATCAACACTAACGTTCCAATGCCGATAAAAAGACCGCGAATCGGTTATTCAACCAGCTCCGGCGAGAACGGCCGGAGGTCTCACCGCCGATCAATTCTCCCACGGAACGCCGCTGATGCTTTTTGTACGTATAGGTATACAAGGCCGAGATATTCAGAGAGTTGATGAAAATGATGAAATTATCAGCGAAATTGATCAAATGAGAGTTGGGCTGAATGTGATAGTCTACAGGGGATTGTGAATATATGGAATGGATGTTTTCCCACCAGTTCTCGGAAAATACAAAAACAGTCGCAAAACAGTTCAGCAATTCCGAACAGGAAGCTGCTGAATAGCATATAGA…
LOC108205230	TTTATTGTCTAAATTTCCCCGGTCATCTTGCATGTCCGACGTATCATTGGGCACTATCACATTTAGCCATGCGAGAACAGAGCTTTATTTATGAAGGTAGCATACAGCCTGACAAGACCTGAAAGAACAAGGTATATATTTGTATATTTTCACTGTATTAGGCTCAGCAAGTAGTCATGTTCTTTGGCTATATTTTCACTTTTTTTCCGGCAGGTGTAAATAAAAACTGTTACATTTTTCCTTTATGAAAGACTCTGTCTTCTATTTCCTTAAATGTTCTATACTTCCCTGTATATTGCTAGAGACCAGAGCTCTTTAGTAATTGCGAGATGCTTAAGATATTTATCAGTGAAGTTTAGTTTTTGTTTACTTTTCCATTTCTAAAGAGGCCAGCAGGAC…
LOC108205230	ATCAATTGCCAATTAGGCAAACCGTCCCTTTAACTCCATCACCACTGGTCACTACAATCAACACTAACGTTCCAATGCCGATAAAAAGACCGCGAATCGGTTATTCAACCAGCTCCGGCGAGAACGGCCGGAGGTCTCACCGCCGATCAATTCTCCCACGGAACGCCGCTGATGCTTTTTGTACGTATAGGTATACAAGGCCGAGATATTCAGAGAGTTGATGAAAATGATGAAATTATCAGCGAAATTGATCAAATGAGAGTTGGGCTGAATGTGATAGTCTACAGGGGATTGTGAATATATGGAATGGATGTTTTCCCACCAGTTCTCGGAAAATACAAAAACAGTCGCAAAACAGTTCAGCAATTCCGAACAGGAAGCTGCTGAATAGCATATAGA…
LOC108205230	TTACACTTTAATCAGGCAATTTATGCCTGACATAAATAAGATAATGAGTCTCAAATATCACAAGACCTCAAGGAAATGCTTCGTAATAACCATTTTCGATCTGTGAGAGTTTTTAAGTTGTGTTTGTGAGGCTCAACTTGTTGGAATTTTAAATGTCCAACAATTATTGCAAGATGTTCTTAATGGAACCCTGTGGATGGAAGTTGGGAAGTGCAAGATCCACCATGAGGACATGAATTTGAAGGAGGGGGTCGGTCAGGAATAGCACCTCAATTGCTTGGGATTGTGAATATATGGAATGGATGTTTTCCCACCAGTTCTCGGAAAATACAAAAACAGTCGCAAAACAGTTCAGCAATTCCGAACAGGAAGCTGCTGAATAGCATATAGAGCATAGAG…
LOC108205230	ATCAATTGCCAATTAGGCAAACCGTCCCTTTAACTCCATCACCACTGGTCACTACAATCAACACTAACGTTCCAATGCCGATAAAAAGACCGCGAATCGGTTATTCAACCAGCTCCGGCGAGAACGGCCGGAGGTCTCACCGCCGATCAATTCTCCCACGGAACGCCGCTGATGCTTTTTGTACGTATAGAAAATACAAAAACAGTCGCAAAACAGTTCAGCAATTCCGAACAGGAAGCTGCTGAATAGCATATAGAGCATAGAGGGTAATTGGTGATGAAGATGGTGACTAGTGTATTGTGGTCGAAGTTGGGCGGTGATGTAGAAAAAGAAAAGACATTGAATTGTGTATCTCTTAAAAGTCAGCTGGCTATCAAGATCTGAACCTATACAGCATGC…
LOC108205230	ATCAATTGCCAATTAGGCAAACCGTCCCTTTAACTCCATCACCACTGGTCACTACAATCAACACTAACGTTCCAATGCCGATAAAAAGACCGCGAATCGGTTATTCAACCAGCTCCGGCGAGAACGGCCGGAGGTCTCACCGCCGATCAATTCTCCCACGGAACGCCGCTGATGCTTTTTGTACGTATAGCAGGTATACAAGGCCGAGATATTCAGAGAGTTGATGAAAATGATGAAATTATCAGCGAAATTGATCAAATGAGAGTTGGGCTGAATGTGATAGTCTACAGGGGATTGTGAATATATGGAATGGATGTTTTCCCACCAGTTCTCGGAAAATACAAAAACAGTCGCAAAACAGTTCAGCAATTCCGAACAGGAAGCTGCTGAATAGCATAT…
LOC108205230	ATCAATTGCCAATTAGGCAAACCGTCCCTTTAACTCCATCACCACTGGTCACTACAATCAACACTAACGTTCCAATGCCGATAAAAAGACCGCGAATCGGTTATTCAACCAGCTCCGGCGAGAACGGCCGGAGGTCTCACCGCCGATCAATTCTCCCACGGAACGCCGCTGATGCTTTTTGTACGTATAGCAGGTATACAAGGCCGAGATATTCAGAGAGTTGATGAAAATGATGAAATTATCAGCGAAATTGATCAAATGAGAGTTGGGCTGAATGTGATAGTCTACAGGGGATTGTGAATATATGGAATGGATGTTTTCCCACCAGTTCTCGGAAAATACAAAAACAGTCGCAAAACAGTTCAGCAATTCCGAACAGGAAGCTGCTGAATAGCATAT…
LOC108192926	GAATTTGATTATTAAAAAGTATCTTTAAAAATCACAATTCGATCCCTAATCCCCCGGTTAAATTTGTTGGGGGCAACTGAACTGAGGAGTGGTCTCTTCTATTACACACAGTAGCACAGTTCAACACACAGCGCTGCCCTATAGGAGAAACTCAGGGTCCTTTACATGGCATGGCTCATGATCGTTGTTTCGCTCAATGTAATTTGGTTGGCTTCCCTCTGCAAAATTCTTTTAGCATCATGGTCTCCCAGCAAGGCTACGTTCTTGAGTAGTTATGGTGAAGCCTCTTCCAAGAAGAATGTTCTGCTGGTAGCCTCGGTTTCGAATATTGTGCGAGGGGGTCCATATCTGGCCATTTGACAGTCTGGTTTCAAGCTTTTTTATGGCTTCCACGCATCA…
LOC108206406	ATATCTGCTTGCAGGAGCAATACCATCAGTCCATGCCCTTTTGCTTTCAAGGGTGATGGGCACATATTCTACTAGTAGAAGAAGCAGGACTTGCTATTTGACACCACTATAGTGCCATACTCCAATTTATAGTGAGGACTTTGGATCAAAGGTCTGCTTTCTTTTTCGAAAGTTGATGTCTCCCATCATTTTCCTGACAAAGATTGACGTTGAGAAAATGATGTTCTGGTGTTCTCTATCTTTTTATGTGCTTGTTCTCCATGGGATAATCAGTCAGCACCAATTTCAAAAGTTTTACGTGATTTTGATGTGGTTGTTGCTGTCAATTCAATACAAAGGCACACTGAGCTTTTTCAAGTTAAAGTCGAGTTACAGTTCCTCCTTGAAAACAAAGAAATG…
LOC108222259	TTTTGTCCTCCCGGTTTGCAATCTACGGGTGGTGTATGTATCATTTAAAAAGATCCGGTGTTATAGTTAGGTGTCGCTTTGTGAAGTGATAAATGTATTACTGCTACCGGAACTGATGCTTAAATCAATATGTATAGTGATTAACTATATGTAGATCTTTCGGATATTGATGTCACCACCACCATCTCTCTGATTTTTTGGGGATTTCCTGCTTGGCTTAAGTTTATCCCTGGAATTTCGTTTAGAACTGAAAATGATCCTTTTAAGGCCTCGAGAAATATTGCTACCAAAGCTGCTCCTCCCAAGGAAAAGAAAGTTGAGCCACAAATAGAAAATGGTGATAAAATTATAATGCCTCCCTCAGCTCTTGATCGCCTTGGTTACGCCTCTCATATTGAT…
LOC108204373	ACAATTTCTTTTTATCCCAACACGTTCTTAAAAATTCAAAACTTCTCAGCCATAAACTCAACAGACTCCACCACTCTCCATTGCAACAAGATAAGCCCTCTCTCTCTCCCTCTCTTCACATTTCCCAATGGTCTTATCACTTCACTCTCACTCCACTTCCATCAACACACACCTCTCTTTCCTCTTCCACCGTCCCAACCGCCACCTTCACCCACCGCACCACCTCAAACTCCGGCGACACTTCTCCGTCACAACCGCCGTCGCCAACAACTCAACTTCTTCAAATCAGCAGCCTCGAACTCTCTTCCCAGGCGGTTACAAGCGCCCGCAGATCAAAGTGCCAGCTCTCGTGCTCCAATTGAATCCACAGGATGTGCTAGTACAAGACAATAGAGATGT…
LOC108204373	ACAATTTCTTTTTATCCCAACACGTTCTTAAAAATTCAAAACTTCTCAGCCATAAACTCAACAGACTCCACCACTCTCCATTGCAACAAGATAAGCCCTCTCTCTCTCCCTCTCTTCACATTTCCCAATGGTCTTATCACTTCACTCTCACTCCACTTCCATCAACACACACCTCTCTTTCCTCTTCCACCGTCCCAACCGCCACCTTCACCCACCGCACCACCTCAAACTCCGGCGACACTTCTCCGTCACAACCGCCGTCGCCAACAACTCAACTTCTTCAAATCAGCAGCCTCGAACTCTCTTCCCAGGCGGTTACAAGCGCCCGCAGATCAAAGTGCCAGCTCTCGTGCTCCAATTGAATCCACAGGATGTGCTAGTACAAGACAATAGAGATGT…
LOC108204485	TCACGGTCTTGTTGAGTTATCAAAAAAGTTAGTTCAAGTAAAGAAGCACAAGGTCTATCCATTGATTTATTTGCTTGTGAAATTAGCTTTGATTTTACCCGTAGCAACTGCAACTGTGGAAAGGGTATTTTCTGCGATGAAACATGTTAAAACAGAATTGCGGAACAGGATTGGTGATGAGTTGATGAATGACTGCTTGGTGGCGTATATTGAAAAGGATGTAATGAATTCAATTGATGTTGAAGACATTATAGTGAGGTTTCAAAATATGGCACCTAGCCCCTAGGAGAGTGTTATTGTGAATTTGTAAGTTGTAACAATAATATGTCAAATTTAATTATATATTATGTACCCAAAAATTTTTTTCCCGGTGGGACTAAAATCCAGCCCCCTCTGGAC…
LOC108205048	ATTTATAGCAACATGAAAACATGGGTATAAATAGTGTTGGTCGTTGCATTTTTTTCCCAACTTTTGCGACTCCAAGATACAAACCCTAATTTGATGTGTCGACTCAACTGCTGATGCAGGGTAGTTTATGTTATGGACCTAAATGCCCCTCCAATACCTGAAGGAAATGAAGCCATGTACAGTGAGGTTTTCAGTGAAGATTCAACCCGAATAGAACCGAGGATGACAGCGGCTGAAACTAATCAGCTGGTCCTCTATTCATCAGGTTGCAGATGGACGACATCCCAAACCAAAAAGAAAGTATCCATATGATAATTCTATGCAAGGTTCTCACAGCTTTAGGAAGAAGAACGAGGGATATGATAGGTATAGCCTACCCTCAGGCTGGTTGGATTGCCC…
LOC108203038	TAAAAACATAGACTTGAAAATGGGGCTGCTGCTGCTCTAACTATAAAGATCGTTAGAATTCAGAGGTTCTCATGAAGTGCAGCACATGTTGCCGAACATTGAAATATGCTCAGACCATGAGAACTGTGAAGCTCGCCGTGCTCAGATCAATATGACAAAAGGGTTCGTAGCTAAGGAGCCAATGAAATGGCATACGGTGAATGTGGTGAGAGGTCTGAAGTTGTATGATGAGATATTTACTGAAACTGAGCTGTCTAAGTTGACAGACTATGTAAATGAGCTTCGAATCGCTGGTCAGAATGGCGAATTATCAGGTGAGACCTTTATCATGTACAACCAGGCTAAACAGCAAGTGAAGGGGGGCAATAAGAGAGAGTTGATTCAGCTTGGAGCTCCAAT…
LOC108203051	CTTGTTAAGCAGCACACCACTCTGGAATTATAGTTGTATTCTTTGAACAAAGTTGTATAATAGTTTTGATTAGTGATTGCAGTGCAGAAACTGATAGCCGCCTCTGAATGCATATTAAAATCATAACAGAACAAATTTAAGGCTTCCACAACAAAGCACCAGCTCGAAGAAAGTTTGTTTGTTTGTTTAATTAAACATCCAGATGGTGATTGACTGCAGCATCCCTGTAATAGATTTTCGAGATTTTCCTGCACAATCAGCTAAACTTGTGCAAGCAGGGGAAGAATGGGGATGTTTCAGGCTCGTTAACCATCACGATGTCCTCCCTGTCAGCCTCATGTCGGAGATGAAGTCTGTGGCGCGGTCACTCCAAGATTTTCCACCAGAAATCAAGTGGCA…
LOC108212056	GAGACCTTCTTACTTAAAATTTAAAATGGCAAAAAATAAAAATGAAAATCGTCCAGTCTATCAGCCCTTACAATTTTGGGGTGGAAGGAGCGGAATTATCAGTGTATGTCTGATAGCCGGAGTAAGTGGACAAATGACCTGAGTTAATACTGCTAACGGATCTCTCTATATCATCAATATCAGCAGTAATAGGGAGAGCGCGTTCAGGGATCACTGGAACTGGCAAATGTGACTCCAAGATCTTCACGACTTGATCCATTGTAGGCCTGGCATACAACTGAGGATGAGAACAAAGCACAGCTAGCAATACATGCTTTTCCATGATATCAGGGGAGCCTAACTCAGGAATACCTTCTTCAACCACATCCAGGGGTCTCCCTGTCCTCACCAATGACCATG…
LOC108212056	AACATCCGTTTGAACAATTCATGTTCCGACCAATCAAACAAGCACTTATTGAGATTATCCGTCCTCTTTGCAAGTGATGAAACAAGCACTAATACAACAACAATGCCATTTTCTCAACTGCTCATCATCATTATTGTTACAATAGCTGGGATTTGTTCTTTATCCTCGTCGCAGCAGCAACCAAACACAGTGGAATGTCCACTAGACTTCAATGTACTCCGGAAACTAGCCCAAGGTTCTAGACCTTCAAACAACTCAGGCTCCGACCCTTGTCGGTTAATTCTACAAGGCCTACATCTAGTTCAATCTGAGTACCTCCAACGCACAAACTCATTCCTTCCACCATCGTCGTCTTCTGAGTCCTGCTGGAACGATTACCAAAATCTATTCGACCAGTCC…
LOC108205456	GCTGTTTCAAGGCATATGATCCATGGCCCATGTGGAGCATACAACATAGATTGCCCGTGCATGAAGGATGGAAAATGTACCAAATACTATCCGAAAGAATTCACAAATGAAACTACAATTGACTCCAATGGTTATCCAGTCTACAGACGTCGGGATGACAAGCATACTGTACACTTCAAAGAAAAAGATATTGAAATTGACAACAGGTTTGTTGTTCCATACAACAGGGGGCTTCTTGTGAAGTATCAGGCTCATATAAACATTGAATGGTGTAATCAGGGGCGTTTGATCAAGTATATGTTTAAATACGTGAATAAAGGTCCAGACAGAGCAACTGTCGTTGTTGAGACAGCTGATGCTGTAGTTACCAATGCCACTAAACAATATGTCAATATTAAT…
LOC108222292	TTAGACTTCTATTTTGTACAGACTAAAGCAAATACTACACACCACATACACCTCCTCTTCGTCTCTACCACAGACACCTCCTCTCCGTCTCTCAACCACCGCCTTCTCCAACCACCGCCCTCTGTCTTCCTCTCCGTCTCGACGAACTCCGTAGCTGGACATTTATTCTACTTATCATTCCATCTCTCAAGAACTTCATCTTCGGTGAAGGTTGATGGAGCGTGATGAGGAGCGTTGGAAAAAGTTCAAAGAAGAGCAGAGGAAACGTTTACGAGATATTGAAGAACAGAGTGTCCCGAAGATGACAGATTTGGAAATTTTGGCAGGCAAACGCAGGATTAAGTTGCAAGCTGGAAACGGACAGAGTGTATTCAAGAGCTACTCACATTTGGTTGGTGA…
LOC108205207	TTTTATATTCATATCAGTGGGGCTAAATTTGGTAAGAACATATAAGTAGCTCGTTTCTCCCCAATTCAATTCAATCCAATCAGATACAAAACCTAATCGATCTCTCTCTCGAATTCGCGAAAGCGGTATGTCAATTCAACTCTTATGCAATTTATTTTATCATCTCTCATTCATTCATGTCTTCGATTTAGCTTATTCTAACTTTTACTGGTTTTTGCAAGATTTAATCTTTCGTCTTTTGCTTAAAGTTTGCTCCTTTATGCCACTAATTAGCTCAAAGATCACTTTTTTCTGCTTCAATTATCAACACATATGCGTGTGTGTGTATGAATGTTTACACCCCTCACAGATGATTCAAAGATCATGTACAAGTCTTTTCTTGTAATATAGCTGATTCTA…
LOC108214237	CACAGCATTTAATTACCTGTGTTCCACTACTCATGTCGGTAAATAATCACGCATGTCGAGGCAGTAAATTAAGTTAATCTTCCCGTGCCATTGCCACCTCTTCAAAGTTCAAACTATCAATTTTCAAAAGTTACCGCTTCTTAACCTCCGATGATGTTACCGAGTTGTGACTCAGTTCCCGCAGCTTCGTCGCCTGGCATTAAAGATGAAGCGAGTGATGGGATTGAATATCAAGACACTGAACCTTTTGATGACATTATTATTGCGGATAGTCCCTTGTCAGAAACCCAGTTGGAAATTCTTCATGCTGATACTGAGGTTTTAGATAGTGACATTGACAAAGTTGTGCTGGATAGTGATGATGAAGGAATACAAAGTACCGAGACGGTGAGTTTGATG…
LOC108204801	AAAGATCGAAATTTTGATAATTACCAATGGGATTGACATTGCCCCAGTAAGTCTCGACTTGTGGGTGTTGCAGAGGATCACCGTACACTTCGCTGGTGCTCGTTAGCAAGAAGCGCGCACCGATTCTCTTGGCGAGTCCAAGCATATTCAAGGTCCCCACCACATTTGATATGATAGTCTTGACGGGGTTAAATTTGTAATGAACAGGAGAAGCAGGGCAAGCGAGATGATAGATCTGATCGACTTCAAGCAACAAGGGCTCAACGACGTCGTGTCGGATCATCTCAAACCTAGGGTTCCCAAAATGATGCATCACATTCTCCTTGCGCCCAGTGAAAAAATTATCCACCACAATCACACTATCCCCCCTCGCCATCAGCCTGTCCACCAGATGGCTCC…
LOC108209070	CTCCAACCCAGCCCACTCTAGTAAGCTAAAAGCAAAACCCTAGAAAACACTCACCTCCTCTTATAACCTATTTCTCCCCATTCCTCCGTATCGAATTGCTGACGGCCGCTTCACATTTCCACCAGAGTAAAGATGAGCAAAGTCACCGGAGGCGCCGGAAAGGGGGGGAAGAAGAAGGGAGCGACGTTCGTGATCGACTGCGGAAAGCCTGTGGAAGATAAGATCATGGACATCGCTTCTCTCGAGAAGTTTCTGCAGGAGAGAATTAAGGTCGGCGGGAAAGCCGGAGCTCTCGGAGACTCCGTCACCGTCGTGCGTGAGAAGAGCAAGATCACTGTCACCTCCGACAGTACCTTCTCCAAGAGGTATTTGAAATACTTGACAAAGAAGTACCTGAAG…
LOC108207062	GACACTATCCTTGAAGCCCAAATCGTATAACTCCTCCAACCCAGCCCACTCTAGTAAGCTAAAAGCAAAACCCTAGAAAACACTCACCTCCTCTTATAACCTATTTCTCCCCATTCCTCCGTATCGAATTGCTGACGGCCGCTTCACATTTCCACCAGAGAAGAGTAAAGATGAGTAAAGTCACCGGAGGCGCCGGAAAGGGGGGAAAGAAGAAGGGAGCGACGTTCGTGATCGACTGCGGAAAGCCGGTGGAAGATAAGATCATGGACATCGCTTCTCTCGAGAAGTTTCTGCAGGAGAGAATTAAGGTCGGCGGGAAAGCCGGAGCTCTCGGAGACTCCGTCACCGTCGTGCGTGAGAAGAGCAAGATCACTGTCACCTCCGACAGTACCTTCTCCA…
LOC108204341	GACAAGATCCGTTAGTAGATCCGAAGCAGACTTTACTTAGCTTTACATCACACGTGCGAGTTTTTCCTTTTTTGTCCGTGAGCCTCAGCCCCTCTCCACTTTTCCTTTTATTTTCTTCAATTTGCTTCCCTCCACTTTACTCCATTGTGTATACCCACCCCTCTCTCCTTTTATTCTCTCTCGAAGTATCACTCTCGATATTACACACGTAGGGAGAGAGAGATTTACACTTGGAGAGAGAGATTTACACTTAAACAAATGCAACAAAATCATTTCACATCAAGCATCATTTCTTATTGAGGTAAGTGCAAATCCTTCTCTCTTTTGTCTTATTTCTTCAAATATGCATTATTCTTATTATTCTAATCACCATTTCAGTTTAATTGCCAACCCCCCACC…
LOC108204341	CAAAGGACTTGGAGAACTTAAAGTGCTAATAATATGTTGAAGTTAGAATATGACCGCTAGTTTTGGGTGGTGCGGTCGCTGTCGCTCTTTCACATGCTGCAATTCTGGAAGAATCTATGCGGGCACGTGATCAGCTCATGGAGCAGAATGTTGCTCTGGATTTAGCACGACAAGAGGCAGAGATGGCTATTCGTGCTCGCAATGATTTTCTAGCCGTGATGAACCATGAGATGGGGACACCTATGCATGCAGTTATCACCTTATCTTCACTTCTACTAGAAACAGAATTAACCCCAGATCAGAGAATGATGATAGAGACCGTACTTAAGAGTGGGAATCTTCTGGCAGCACTCATAAATGATGTTCTAGATCTTTCTAGACTTGAAGATGGTAGCCTAG…
LOC108204633	AGATAAGTAGATAACCTGGAATCTTAAGTTCAAATCACCTCCTGGCTGACACGATTACACGAAGCGGCGCGACACTCCTCTCAGGCTCTCACCGGGCTCTCCGATTATCAAACACGAATCACCTCCTCATCTTCTAATCTTTATCTCCAGCATCAGCAACACGATTACACGAGTCGTCATCTTCAATTCCAGAACAAAACGATTAAATACCCTGCAACATTTTGTAAAAAAAAACCTACAACATTCTTCACCTCCAAAACATCATGCATGTTAACATCAGACGGATGTTTTCGACGCTTGCTGATCCATTAAAGACTTAAAGTGCATAATATCTTGTCATAGCACAACTAATAATTTCGTGGGTCAGACAAAGAAACGATACTTCAAATAGAAAATAAT…
LOC108204633	AGATAAGTAGATAACCTGGAATCTTAAGTTCAAATCACCTCCTGGCTGACACGATTACACGAAGCGGCGCGACACTCCTCTCAGGCTCTCACCGGGCTCTCCGATTATCAAACACGAATCACCTCCTCATCTTCTAATCTTTATCTCCAGCATCAGCAACACGATTACACGAGTCGTCATCTTCAATTCCAGCCCAACAAAATTGGAGCCAATCCACCGGAAACTAAACACACTTCCCGGTACTCATTTTTGGCAATTCCTGGCGGCTTTGAGGAGTTGAAGTCTCGCAACATGTCGATTTCTGTAGCGTATCGGCGATTAACTAGCTGCGGATCCACGTCGTCTGGTCTTGCAAACGCCAGTACTCTCAGATTTTTCTCTTCTTTTCGAGAGGAACGA…
LOC108207401	TTATTTTGTAATTTCGAAATAAATTAATTTGGGGAGCAAGTTTGTACAGAAATACTAGAAAAACCTCTCCAGAAGCGCCCATTGTTCACCTTAATCGATCTTGAATTATTTCGATTCACACTCATACTTCGTTGATTACACAGACAGAGATTGAGAGAGACAGCAGAGAGAGACAGATGGCCGGAACAGGAGGTTACGCCGTCTCGCGAAGCCACGGCGGCGACCGTTTCTACAATCCTCCGGCAATGCGTCGGCAACAGCAGTTACTTTTACAGCAGAAACAAGAAAAATTGCAGCATATGCAGCTTCATCGTCCGGAAAAGTCGCCGACGCCGGTGGTTGTTGAGCCGGAAAAACAAGCTTCTTCCGAAGATTCAACGGCTACATTGTTAAAGATTG…
LOC108205372	CGTACTCTCATTTTCTTTATTTCACTAAAATAGAATGGATACAGTAGCAATCCAAGCATGGTCCAACTCAAACCTTTACGCCTTCCATCTCTTCTTCACTATTTCAAAAAACAAACAAAACTGCAGCTTCTTTTTGTGCAAGTATCATCATAAAACTCTTATTTCTGCTGATTTCAATTTCAAAATTCAAATTCATATCACGTCGTTGCTTTCTATCATGTTATATTTTGAATTTGAATTCAAACTCACTCAGATATATTTCTTTTCTCTCTAGCCTCACACAGCCGTTTGCTCCATGTATCATATGTCCCTCTCTCTCTCTCTCTCTCCCTCTACCCGAATCTCTCTCTTCCTCCCTCTGTCTATCTCTCTCTCCCCCGGCTTTCTCTACACTCTCTT…
LOC108205372	TATTTCTTTTCTCTCTAGCCTCACACAGCCGTTTGCTCCATGTATCATATGTCCCTCTCTCTCTCTCTCTCTCCCTCTACCCGAATCTCTCTCTTCCTCCCTCTGTCTATCTCTCTCTCCCCCGGCTTTCTCTACACTCTCTTTCCGTTTCTTCGTGTGTTTCCGTCCGACTCTCTCTCTCCCCCTTACCATGTCCCTCTTTTCTAATATATATGTAATTGACCATTGAGGCAGGGGAGTGAGTAGTGATCTTCTAATGGAAGAGATACGATTTGTGCTTCTTCTCTCTCTATCGTGTTCCCCTTTTTCTAGGGTTTCAAGATTCTCCAATTTAATCTCTCTCTCGCCGGAGCTGGTTGGAGACTTCTCTGAAGAAATTATTAAAAGAGAAAAGCTTTG…
LOC108205372	TCTTTCCGTTTCTTCGTGTGTTTCCGTCCGACTCTCTCTCTCCCCCTTACCATGTCCCTCTTTTCTAATATATATGTAATTGACCATTGAGGCAGGGGAGTGAGTAGTGATCTTCTAATGGAAGAGATACGATTTGTGCTTCTTCTCTCTCTATCGTGTTCCCCTTTTTCTAGGGTTTCAAGATTCTCCAATTTAATCTCTCTCTCGCCGGAGCTGGTTGGAGACTTCTCTGAAGAAATTATTAAAAGAGAAAAGCTTTGGACAGGTACTAATCATGATTATGTGCTGTTTATAAGTTTTGGGAAAGATAATGTTTTGGTAAAATGTGCTTGAGTTTTTTGAATCAATGGGTTTTAAATGTCTTGAGAGGAAAGGTGTCGCAGACTTCTTGCAAGAAGT…
LOC108205372	ATTTCTTTTCTCTCTAGCCTCACACAGCCGTTTGCTCCATGTATCATATGTCCCTCTCTCTCTCTCTCTCTCCCTCTACCCGAATCTCTCTCTTCCTCCCTCTGTCTATCTCTCTCTCCCCCGGCTTTCTCTACACTCTCTTTCCGTTTCTTCGTGTGTTTCCGTCCGACTCTCTCTCTCCCCCTTACCATGTCCCTCTTTTCTAATATATATGTAATTGACCATTGAGGCAGGGGAGTGAGTAGTGATCTTCTAATGGAAGAGATACGATTTGTGCTTCTTCTCTCTCTATCGTGTTCCCCTTTTTCTAGGGTTTCAAGATTCTCCAATTTAATCTCTCTCTCGCCGGAGCTGGTTGGAGACTTCTCTGAAGAAATTATTAAAAGAGAAAAGCTTTGG…
LOC108205372	ATTTCTTTTCTCTCTAGCCTCACACAGCCGTTTGCTCCATGTATCATATGTCCCTCTCTCTCTCTCTCTCTCCCTCTACCCGAATCTCTCTCTTCCTCCCTCTGTCTATCTCTCTCTCCCCCGGCTTTCTCTACACTCTCTTTCCGTTTCTTCGTGTGTTTCCGTCCGACTCTCTCTCTCCCCCTTACCATGTCCCTCTTTTCTAATATATATGTAATTGACCATTGAGGCAGGGGAGTGAGTAGTGATCTTCTAATGGAAGAGATACGATTTGTGCTTCTTCTCTCTCTATCGTGTTCCCCTTTTTCTAGGGTTTCAAGATTCTCCAATTTAATCTCTCTCTCGCCGGAGCTGGTTGGAGACTTCTCTGAAGAAATTATTAAAAGAGAAAAGCTTTGG…
LOC108204465	AATTATTTGATAGATTAATCTTGCTTACATTGCAGGACTCTTTGGTGTTTTCATTTTTGAGGAAATTAAATGGATCATAGTGCCTTGGAAGACAGAGACCTTGAGAGTGGAGGAACAGGCAGCGAAGATGAGCTGAGTAGCGGAAGCATTTCATCCAACAAGTCAGCAAGAAGTGTGTTTGGTAGACTTAGGACTGATATTTTGGGTTTTGAGGGATATGGCAAGGATGAGTGTAGTTCGAGCACCTATAACATGTCAGGAAATTCTAATCAGGCTTTGTATGAAAATAAAGATTCTTTAACAGACAAACATTTAGAACAAGGCATAGAACAGCTGCCTGTTACAGAGAAAAAGAACATAAAAGAGAAAAGGAAAAATTCTTTTCGAAAGGCCTCTAGA…
LOC108204465	ATAAAGTATACTAGTTTTTCATTTCGAGATTAAAAATATTGTCCAAAATTACATAAAAAATATCGCTGTTGTTTCGGAGAAAAAAGACAAGAAAAGACAAATGATTGACTAGCAAGCCAGCGTGTCATATGTGCAGCTCCGCCATCTTCATCCATCACAAGAGTTGCAAATTGTAGTATAATATAACCAAATTTCATCACCCGCCCCTGTTGGTTCGGACAAAACTCACGCACAAAGCACCTCTGTTGATGTTCTTCTCCGCCATCTAAACTGGGCTTCCCTAGATTCTTCCGGTCTCAACGATCACCTTACAGAACCGGGCTGAGTTTTTCTTAATTATATTTACTAGGACTCTTTGGTGTTTTCATTTTTGAGGAAATTAAATGGATCATAGTGCCT…
LOC108205065	GAGAAATCATACAATTCAGAAGCTAGAAGAGGCTACAAGCCCTAGCAAGTTCTTCACTCTCGCCGCTGCGCTCTCTCTCTCTCATCTCTCTCACTTCAATTTAAGCTAAGGTAAAGTTCCTTGAAACTCGGTAATGGATAATAGAGAAGGTTCAGACATTGATGATGACTTTAGTGAACTTTATAAAGAGTACACTGGACCTCCAGTACTTAGTAATGTTCGTGCACAAGATGTACCAAAAGGAAATAAAAGATCTCATGCTGGTTCCGATGAGGAGGAGGAACCTCGAGATCCTAATGCTGTCCCAACTGATTTTACTAGCCGAGAGGCTAAGGTTTGGGAGGCTAAGTCAAAAGCTACTGAACGGAACTGGAAGAAAAGGAAGGAAGAAGAGATGAT…
LOC108199029	TGAAGGAAAAAACAAACAATACAGCGTCTAAGGAAAATACTGATCTTGCCTAGTATTCGCCGCTAGTTCCCAGACACAACCCCGCAGAGCTAATCACCGTACCAGTACCTCTGTTCCTGTTTTTCTCTCATTTGTTTCTAAATCTCTTGTTTATACCACACCAATTCGAAACACAATCTGAAACTTGTCCCATCTCTCTCAAGAATCATAATTATACACACATCTGTGTGTTTCATATCAATCACTATCGAGATCTCGCTAGATTTTTACACTGACCAAGAATGATATCAAACTGAGTTGTTGCTGATGCTAAACTAGTTATGGTAAGAAAGTGTAGAATTTGGTGGCCCACCCATCTTTCAACTGACCCAACTCACTCTTCAACACTCTTGTTTGGTT…
LOC108205500	AAAAGATACATTAGCGAAATTTTTGCCTATCTCATCCTGAAAATAATTTTAATTAAAACAAAAAGTAGTGATTAACAGCTGGAAATTACACGCCAAAACCCTCTATAAAAGTCTGCTCCTATCTCTTACGTTACCTTCTTTCCGTCCCGTAGTTTCATCGTACGTATTTTGCTGTTGATCTCCTTACATCGATCGGTTAGCTTACGATAAACCTGTTCACCGATAGCTTCTTGTCTTAAAATAATTTTGAAAAATTTATTTTTAAATATATGTGTAATCTGTGTATTTAGATGTTAGGTGTAATGATCCGATGATTTTCATGCGTCGTATTCGAATTCTTCACTCATTCTCCGTTGTCTATCTCTACTGGTTCTACGTTTTTTCATAAATTAGCCTCTC…
LOC108204505	TGCTAAAAGCAAAGTGGGGGGCAGTGAATGGGTGGTTCATGTATACACAGATGATTCCTATTATTACTACTTGACCACTCTTCAAGTTTTGATTTATCAAAAAAAAAAAAAACTCTTCAAGTTTTGAATTTCGGAACAACCCCTTTAGTTTCTTCCCTTGTCGAAAGGGTCTTCTTGCATAGAAATCTTTAATCTTTCTCGAAACAAACAAAACCCCCATCATTTTTCTATTGAAAGTTTCAATCTTTTTCATCAAGAACTCATAAAGATTCAGTCTTCATGCTTGATTAAGTTGTGAATGTCTCTTAAGGTGTGATTGCTAAGGTGTTTGATTGATTTTGTGGGTTTTTTCTGAAATTGGGTCAGAGTGATGTGGATCAGACCCAAGAAGGAGGTTCT…
LOC108195451	AGTAGCACAATAATTCTTCTTCCTCTAGCTCTTATTCACAATTTACACATCTTTATTTTCCAGTCTTAAAGTTCACAATGCTTGCTCCTTCTCCAGCCCATTTTTCCACTAGAAAATCCCCAGCATTTCGTATTCCAACAATTGATATGTCTCTTGACAGATATTTAGTCTGTCATGAAATTGTACAAGCTTGTGAAGAGTACGGTTTCTTCAAGCTTGTGAATCATGGAATTCCTGATCATGTCATATCAAGCATGGAGGAGGAGAGCTACGGTTTCTTCTCAAAGCCGGCTCGCGAGAAGCAAGAAGCAGGACCTCCATCTCCATTCGGATATGGATGCAAATCAATCGGCTTGAAGGGTGATATGGGGGAACTAGAGTACATTCTTCTGGAAGCCA…
LOC108212161	CCATTTTTTTTATTATAAATAAAGCCCTTCTTACCACCTTCACAACACAAACAAATTCTCGAACTTACTAGCCAAGTACTTTCAAAACCTAGTAATCTGCTGTCTGAAGAAAAACACAAACACAAAAACATATTTATATCAATGGCACCAGTTATGAATCAATCCAACGGGAGCTTCAGGAAGTCGAAGGCTGTTGAGGCCGGCAAAAAGAAAGCGTTCGTGACGTTCTTGGGAGGTGGCGGTGACTATGTGAAGGGTGTGGTTGGGCTGGCTAAGGGACTGAGGCAAGTTAACTCAGCCTACCCTCTTGTGGTGGCTGTGCTGCCTGATGTTCCGCAAGAGCACCGCCTTCTGATGGTGCAGAGTGGGTGCATTCTGAAAGATATTGACTGGGTGCAG…
LOC108222523	AAGGCTATCTAGTACAGTAGTTCAATTCTGTGATCTATCATTAAATTCTACCATGACCAAAACAGTAGTAATACACTAGTAACAACTCAACTCACAACTCACCAGTCAGAAAAATCATCTGCTCACAAGCTCACAAGTCACACCTCACTCTCTTTCTGTTTATGTCACCAACTAATCCCACAAATCAAGAAACCCCATTCCATTTTCTTGATTTCCAATTCAGTGGGACTTCCTAAAAGACTAACACTTCAGAATTTAGACTACATGTATATATCAACACTGCATAATTAGCAAGATATCAATCAAATGGCCTTAAACACAGTAGGTGATGCTGTGGGATTAGACTATTGGCTTCAGTGGCAAGTTCTTGTTTGTGCCTTAATTATCATAATCCCATTA…
LOC108205186	TTTCCCACGGGTTAAAAGCTATATTAATAATATACTACTGTGTACATACACTGGTGCGTACTTAGGCTTACAACTTTTTATTTTTTAATAGTAATCCCACTAGTCCACTACCGCCTAATTCCCTGAAACACTAATTCCCACGATCGCCTCCCGCTTCTCACTTTCCAGACGGCAGTGCGGCGGACGGAGCCTCGGACTTACTGACTCACCATCTTCGAACACCCACAAGAAATAAAATCCTTTAAAAGCCTTTATAAGACTGTGCCGAAAATTATGACTGATCCTCACAGTATTCACCAAGATTTGCTGCAAAAGTTGGTATATGATGCACTTGTTTGGAGTTCTCTTCACGGGCTTGTTGTTGGAGATAAAAATAACCAGGATATACGCTTGGGGTTA…
LOC108204568	CTGTTTCTTTCTTTGAGCATGATGTTTGTTGAATTGGCCATCTCTAGTTAATGCTTTTGTATTGTCTGTAGGAATTGAGGCAGTTGAAATCCAGCTAGTGATTAGAGAATTTGTATCATGGCCGCGATGAAAGGCCTAAATGGTGGTAGCACAGAGTTATGTATAGCCCCTACATCAGGAGTTCGGAATCTGGAAAATGAGGCGGGAAACAGTAATGAAGATCAAAAGAAGGCGCCCGAGGTTATCAAGGATCGGTTGCTAATGGATTATGTATGCCTCTTATGAGCGTTCTTATTGGTGAATTAACTGATGCTTTTGGACAAAATCAAAACAATAATGAGGTGGTAGATAAAGTTTCCCAGGTATCATTAAAATTTGTCTATCTGGCGGCGGGGGCTG…
LOC108204568	TAATAGTGTTGTTGAACTTGCTGTTGCTTTGCTTAAAGTTACTCTCTTTGCTTTCTTTTTTATTGACCTAATGGCTGGTGATTGAGGCAGTTGAAATCCAGCTAGTGATTAGAGAATTTGTATCATGGCCGCGATGAAAGGCCTAAATGGTGGTAGCACAGAGTTATGTATAGCCCCTACATCAGGAGTTCGGAATCTGGAAAATGAGGCGGGAAACAGTAATGAAGATCAAAAGAAGGCGCCCGAGGTTATCAAGGATCGGTTGCTAATGGATTATGTATGCCTCTTATGAGCGTTCTTATTGGTGAATTAACTGATGCTTTTGGACAAAATCAAAACAATAATGAGGTGGTAGATAAAGTTTCCCAGGTATCATTAAAATTTGTCTATCTGGCGGCG…
LOC108204568	CTTGTCCCTGGTTCATGCACGCCTACCAAGTACCAATATCCCATTTCTCCGAGCAAACGCAGGGTGTTCTTTCATACATATAAAGTTGCAAGAACTTGCCAAATTCAGATTGAGGCAGTTGAAATCCAGCTAGTGATTAGAGAATTTGTATCATGGCCGCGATGAAAGGCCTAAATGGTGGTAGCACAGAGTTATGTATAGCCCCTACATCAGGAGTTCGGAATCTGGAAAATGAGGCGGGAAACAGTAATGAAGATCAAAAGAAGGCGCCCGAGGTTATCAAGGATCGGTTGCTAATGGATTATGTATGCCTCTTATGAGCGTTCTTATTGGTGAATTAACTGATGCTTTTGGACAAAATCAAAACAATAATGAGGTGGTAGATAAAGTTTCCCAGGT…
LOC108204568	CTTGTCCCTGGTTCATGCACGCCTACCAAGTACCAATATCCCATTTCTCCGAGCAAACGCAGGGTGTTCTTTCATACATATAAAGTTGCAAGAACTTGCCAAATTCAGGTATTAATATTAATATTGATATTACTAAAATATTTGGTTTGTTATAATAGTGTTGTTGAACTTGCTGTTGCTTTGCTTAAAGTTACTCTCTTTGCTTTCTTTTTTATTGACCTAATGGCTGGTGGTAGGTGCTTCCCATGTCTTTCAAGCCACCCTCTTTTTCTTCATTTTAATTATGGGTTTTGAAATTAATCACTATTTATTTGATGGGCTTTTCTTGAAATTTCATAAAGTTGAGTTCTTGATATTCAAGATTTTGATGCCATTTTCACATTTTTAGATTTTGAGGGT…
LOC108206718	GGTTGGCCGCAGAACTAGTTAACTGGACTTACATGACCCAACCCAATCGATTGAAATTGTAAATTAGGGTTCCGAGGTGAAGAACTCGTTTGCTGCGACTCACTTTCATCTTCTTCTCCCCCAAAACACATAAACTTGCTCATACTGATTTGCTCCATTAGCATTAGCAAGTATGCTCACCGGAGACATACCTCCTAATCAAACTATCTACATCAAAAATCTCAACGAAAAGGTCAAAAAAGAAGTATGGAAGGATCTTGGACATTGTTGCTTTGAAGACACCGAAGCTGAGAGGACAGGCGTGGCTTGTTTTTAGTGAAGTTACTGCTGCTAGTAATGCTGTTCGACAGATGCAGAATTTTCCTTTTTACGAAAAGCCTATGCGTATACAATATGCCA…
LOC108204901	CCGCGTGTTTAACTCTGGCACTCTGAAATACTCCCAAGTCCCAATACAAAACTCAGTGGATACTTGGTGTATAATTAATCTTAGGTAATGTACTCCACATGGTCGTCGGCAGTTCTAGCCGTTGGTTTGACTCCGTCCTTCCACCGCCACATTTCACCGGCCGGCGAAAAACTCCGTCAGTTATGTAAATCATCATATTTTTCAGAGTCTTCAACAAAAAGACGACGATCAGTTGCGTTATTGGCGAGTAGTTCGAGTGGCAGAATCTTGAAAATAGGCGAGAATTCAGAGGCTGATAAGAGATTGAGCCTGAAAGATTACTTTGAACAGTCGGAGTATTTATTCCGATCAGACGGTGGACCTCCGCGGTGGTTCTCCCCGTTAGAGTGCGCTTCTCAG…
LOC108204901	CCGCGTGTTTAACTCTGGCACTCTGAAATACTCCCAAGTCCCAATACAAAACTCAGTGGATACTTGGTGTATAATTAATCTTAGGTAATGTACTCCACATGGTCGTCGGCAGTTCTAGCCGTTGGTTTGACTCCGTCCTTCCACCGCCACATTTCACCGGCCGGCGAAAAACTCCGTCAGTTATGTAAATCATCATATTTTTCAGAGTCTTCAACAAAAAGACGACGATCAGTTGCGTTATTGGCGAGTAGTTCGAGTGGCAGAATCTTGAAAATAGGCGAGAATTCAGAGGCTGATAAGAGATTGAGCCTGAAAGATTACTTTGAACAGTCGGAGTATTTATTCCGATCAGACGGTGGACCTCCGCGGTGGTTCTCCCCGTTAGAGTGCGCTTCTCAG…
LOC108205161	GGGGGAGGTTGGGATACAGCACAGTCGGATAAGTTGAGCAGCCGCAGTCTCTGAGGACGATGATGGGTATGATTCCGGCGACAGCAGCAGCTTGTTTAGATAGTCGTAGCTTCGCATTTCATGCATCCCTTAATATTCCTCAATTCCCCACTTTTAATATCATTCCAAACAACCCCTCCTCTTCCTCCTCTCCCCGTCGTCTTTCTTTAAGAAAATCCACTGCCATCACTCACTCACTCCACCACGACACTGCCTCCGGCTCAACTATGGATCCAAATTCGCCGGTCAAGAACAAGGCTGAGGATATAGCACCTGAGCTTAGAGGAACTTCCATATATCTTGTTGGGATAAACAGCAAGATAAAGACAAGCTTAGGAGAGTTCATGGCTGAAACATTAC…
LOC108210463	CTGGGTGTTGCGTTTCTTGGCGAAGCCTCTGGCGTGTTGGAAGGGAAAAGTGATGGGTATAGAATTAGGANTAGGAGTGGAATTGAGAAGATTAAAATGGGGGGAAAGGAGATGAGAAAGATCATTGTGTTGTTGGGAGTGTAGAGATGAACTTCGAAATAGGAGAGAGAATTGACGGGAAGATGAAATAGCACGACTTATTGACCTTCTCATCGCCATTTTTCAGCTTCTGATGTGAACTCTGTCTTGCTTAGGGTTTTACAGAACCCCTGTCTCCATTCTTTTCC
LOC108204824	CAGCCCCCGCGTCCGCGTGTGTCTTGACTGGTAGGAGTAACTAGTAAAGTTAAACACCCCATCTCCTCCTTCCTCCTCTATCGTCCAAATATCCGCGCTGTTTCTTCTCCAACCCCCTGTTTCTTCATTTCTTCTTTTCCAGAGAGAGAGATAGGTCGTCTTGATTGATTACTCGTCCGACAATTCCCCAGATCGCTCGAAAATCTAGTAGGCCTAAAAGTATGGTGTTCGCGAAAGATGAAGCAAGCTCATCTTCATACACCACCGAGAATTCAACTCTCATACCCAAACCCCATCTCCTCTCATCCCAATCAAAGACCTTCGCCAATGTTTTCATGGCCATCGTCGGCGCCGGAGTTCTTGGTCTTCCCTACACTTTCAAACGAACCGGCTGGCTCA…
LOC108204824	AATTAGGCAGCCCCCGCGTCCGCGTGTGTCTTGACTGGTAGGAGTAACTAGTAAAGTTAAACACCCCATCTCCTCCTTCCTCCTCTATCGTCCAAATATCCGCGCTGTTTCTTCTCCAACCCCCTGTTTCTTCATTTCTTCTTTTCCAGAGAGAGAGATAGGTCGTCTTGATTGATTACTCGTCCGACAATTCCCCAGATCGCTCGAAAATCTAGTAGGCCTAAAAGTATGGTGTTCGCGAAAGATGAAGCAAGCTCATCTTCATACACCACCGAGAATTCAACTCTCATACCCAAACCCCATCTCCTCTCATCCCAATCAAAGACCTTCGCCAATGTTTTCATGGCCATCGTCGGCGCCGGAGTTCTTGGTCTTCCCTACACTTTCAAACGAACCGGC…
LOC108204749	TAGTATTTAGTACATAGCTAAATCCAAGTTCAAGGGTTTCACAAATTCTGCATATTTTCTGTTAAATTTGTTTTCTTTCTAATGTGATTTTTCAAATTTCGTTGGGTTTAATTGTTAATAATTAGATAAAGGTTATTGGCAAGATTAAATCAATTTTCTAGTTTGAAAGGAAGGAATAATGCATTTCTGAGTTGTTTAGTATCTTCGATGAGTAGGGCAGAATCTGGGATATATGCTCAAAAATCTGCTATGAGTGTAGTTTGGGTGCTGGTGTTATGTTTATTCTGCAATGGATGTCATTCTCTTGGAGCTGATGTTAGAAAAAGGCCCGAAACCGTGAACATTGGCTCTATCTTTACATTTAATTCAATTATTGGCAAAGTTGCAAAAGTTGCTGTA…
LOC108205249	ATGTGGTTCTCAGCCATAACATTAAAGATCCCTTCTTAAATTAATCTGAATGCCGTCTCAGTAGTCAGTGTATTCCAGAACAGGTAGTAGGGGTTGCTGGCTGCCGCGTGGCCACGGTGGTGACGGGTGAAAATTAGTTATAAATATATGTTGGAACATGACGGAGTATTGTTTTGTTTCATGAAATGAAACTACTAGGAGCGGGTTCATATATCAATTTGTTTAAGTGGGGCGAGGCCGCAATTGATCAGTAGATGGCAAGTTCAAAGTTAAATTGTTTAGGCCACCAATTTTTACAGTTTCAACCATCAAAAGCTTTGTCTTCCTGTAAAAAACTGGAAGAACTGCAAAAAATCCATTCTTTGTTAATAGTGTGTGGACTCGATAAAATCAACTTGT…
LOC108205249	CGGAGAGAGTCACAAAGAGTTGTTGCCTAATTCTTCTGATCCTGCTGCTATTATTCGAATCTTTGGCGTCACAAGAGAAGGTATCAATTATCATACTGATATGCATCTTTCTAGCTTCTCACAAAAGAGACCCAATCAAATCCTCAGATTTGCTATGCATGAATTGGGTCTTTCCTCTCGGAAGCCTTACAAGAAATGTGCAAGCTCAAGAATTACTAAAGAATGAAGTTCGAGTCATCCTTGGACCCCAAACTACTCCTGAAACAAATTTTGTTGTTGAGCTTGGAGCAAAATCTCAAGTTCCTATTGTCTCCTTTTCGGCAACAAGCTCTTATCTATCACCTGTGCGGAGCCCTTACTTCATTCAGATGGCAGGGGCTGATTCTTCTCAATTGAAAG…
LOC108205249	ATGTGGTTCTCAGCCATAACATTAAAGATCCCTTCTTAAATTAATCTGAATGCCGTCTCAGTAGTCAGTGTATTCCAGAACAGGTAGTAGGGGTTGCTGGCTGCCGCGTGGCCACGGTGGTGACGGGTGAAAATTAGTTATAAATATATGTTGGAACATGACGGAGTATTGTTTTGTTTCATGAAATGAAACTACTAGGAGCGGGTTCATATATCAATTTGTTTAAGTGGGGCGAGGCCGCAATTGATCAGTAGATGGCAAGTTCAAAGTTAAATTGTTTAGGCCACCAATTTTTACAGTTTCAACCATCAAAAGCTTTGTCTTCCTGTAAAAAACTGGAAGAACTGCAAAAAATCCATTCTTTGTTAATAGTGTGTGGACTCGATAAAATCAACTTGT…
LOC108204918	AGAGACCGTATTCGTGGGTATCTTACTCCGAGCAAGAACGCTGCAGAGGGGCACGCAGAAGATGTATCGAAGTTTCTGCAACTGATCAAATACGTCTGTGGTGCTTATGATGCGGCAGAGGGTTTTCAGAGTTTGGATAAGGAGATATCTGAGCATGAAATATCCAGAAAGAGTATTGAAGGATCGTCCCGGAGACTGTTCTACCTCGCCCTTCCTCCTTCAGTGTATCCTCCTGTCTGCAAGATGATTAGGACTTACTGCATGAATAAATCTGATCTCGGTGGATGGACTCGTATCGTTGTTGAGAAGCCCTTTGGTAGGGACTTGGAGTCAGCCGAGCATCTCAGTAACCAGATAGGAGAATTGTTTGAGGAGCCACAGATATATCGTATTGATCAT…
LOC108208358	ATAATATCTCATAAAAAGGGTAAATAAGGTTGTCCGGAAGTGATGATTGATTGTCTCTGTCGGCCGTGCGTCATCATATATGAAGGAAACAAAAGTAAATACCGAGCAACATATTTGGAAAGTAAACAGTTTGAAGTATCTTCTTCATCTGCTGCTGCTTGTAGTGAAGAAGAAGAGATGGGGCTGGAGAATTTCATGAAAAATGGGGTGCCCTTCATTGTAATGATAATAGTAGAGAGCGGGGAAGTAGGGATGATAACATTGGGCAAAGCAGCCATGGATAATGGAATGAGCAATCTTGTTTATGTTGTTTATTACAATTCCCTAGGCACCCTCCTCCTCTTTCCCTTCTTTATCTTCCGCTTCTTCAGAAGTGACAGGCCTCCTCTCACTCTCAAT…
LOC108204451	CTTACTTGGTATAATAGTTATATAAAGACAAGAGTACACCAGTTGGGGGAATAAATTACTTCTGCTGGAAATGAGTATGTGTATATTACTCATGTGTTTTCTGTCCTTTTTCTTGGAGGAGGGTGTCCTGTTTCTGATATTATCCTTATCTTAATACAAGCTGCTTAGACTTTCCTTTCTTATGTTTTCTCTTCTTGCTGCTGCGTGTACCTTTTTCCATATTCTTAATTTCTTATATTGCAGCCATGGGTTGAGAACTGCAATTTGTGAAGCAAGCAAGTTTGTATTGGTATATCTAGTCCCAACACTTCCGGATATACAGGTTCAATCTGCTGCATCGCTATGGAGCACTGTTCTGGGGACCACCTTTCGAGTACCTACCGAAGTAATAAAGCAAAG…
LOC108204451	CTGTTATAGTACATTCAGTACTTTATGCTCAAAAATAAGAGATAGCTACAGTTAGTTTAGTCTGTGCAGCTAAAAGTTTAGAAGATGACCACGTGACATGTTATATTTCCCTCTTTACTTCCATTTGTGTCTGAAAAAACTCGGGAGCACAAACATCAGCTCAGATTTTGTTATTTGCTTTCTTCTTCATCAGCTTTCTCTCTATTTAAATCTTGGGAGCAGGGTGTAAAAATCTTGAAATTTTGTCAGCTGAGTAAGTTTCTCTGTTTTTGGGATTTGGCATTGAACCTAGGTTCAATCTGCTGCATCGCTATGGAGCACTGTTCTGGGGACCACCTTTCGAGTACCTACCGAAGTAATAAAGCAAAGATTACAAGCTGGAATATATGAGAATGTAGG…
LOC108214955	GAAAGTTATATGGATATGAGGCCTTTGAGCAGCTGCTAGATATCCTATCCCAACTGATGGGGAAACATTTCAAAATTTTGGTCATCAAAGAGCCATGTCAGCATTATCCAGATGATCAAGCAATGAGTGGCTATCTAAGCCAGCCTCACCGACGGCAAAGCACATCTTCGACAGTCTGCTGCCGCCTCCTCACAATGTCTATCACTTCCGAAGCTTCCTCTGCAGCCTCAGGCTCAATCCCCCAATCGCGCTTGGAAGGCCACTATGTTCTGTCGTAAGATTGCCCGTGATGTTGCTGCCATGGCTACAGGAGAAATTGCTACAAAAGAGGTGACCACCGAGGAGAC
LOC108205214	TTTGATGAAAATTAGGGCCTGTAGGTGGTAGAGTACTAGAGGTAATATATATAAGGGCGGGGCAGAGACGAAAGGGGAGAGATTGATAGCAAAGAAATTGCAAAAAGATTAAAGCGCAGAGCTCAAAATTTGCTTTCTGATCTGTAAGGTGAATTTGGCTGAATTGGACTGCAGCTATTGTATTGGAAGAGCGGAAGGGTTGAGATATATAGATGGCAGACGGTGCAGAAGTTGAGGACCGTGTGGATTTTGATGACGACAATTATGAAGAGATGGATGATGATGTTGAGGAACAGTTGGAGGATGAAGGAGGTGATGATGTACAGGATGAACAAGACGATTTGAAAAGTCAAAATTCTGGGAAGGAGTCCCCTGAAGATGACAAAAGCCGTTCAAGCA…
LOC108205214	TTTGATGAAAATTAGGGCCTGTAGGTGGTAGAGTACTAGAGGTAATATATATAAGGGCGGGGCAGAGACGAAAGGGGAGAGATTGATAGCAAAGAAATTGCAAAAAGATTAAAGCGCAGAGCTCAAAATTTGCTTTCTGGTATGCAAAAATCTGTAAGGTGAATTTGGCTGAATTGGACTGCAGCTATTGTATTGGAAGAGCGGAAGGGTTGAGATATATAGATGGCAGACGGTGCAGAAGTTGAGGACCGTGTGGATTTTGATGACGACAATTATGAAGAGATGGATGATGATGTTGAGGAACAGTTGGAGGATGAAGGAGGTGATGATGTACAGGATGAACAAGACGATTTGAAAAGTCAAAATTCTGGGAAGGAGTCCCCTGAAGATGACAAAAGC…
LOC108205214	TTTGATGAAAATTAGGGCCTGTAGGTGGTAGAGTACTAGAGGTAATATATATAAGGGCGGGGCAGAGACGAAAGGGGAGAGATTGATAGCAAAGAAATTGCAAAAAGATTAAAGCGCAGAGCTCAAAATTTGCTTTCTGGTGAATTTGGCTGAATTGGACTGCAGCTATTGTATTGGAAGAGCGGAAGGGTTGAGATATATAGATGGCAGACGGTGCAGAAGTTGAGGACCGTGTGGATTTTGATGACGACAATTATGAAGAGATGGATGATGATGTTGAGGAACAGTTGGAGGATGAAGGAGGTGATGATGTACAGGATGAACAAGACGATTTGAAAAGTCAAAATTCTGGGAAGGAGTCCCCTGAAGATGACAAAAGCCGTTCAAGCAACAATGCGA…
LOC108222632	CACGTTTACAATAAAATGATGAATGTTCGGGCGTAGACTCATTTCCCCAATTGACCCCACTTGACACTGCTTTTCTTTCCTTTGTTCAACTCTAGGGTTTTACAAGGTTTGTTCATCTGGAGTAATTGATAATTGTAAATACATCAATTTGTAGATATCAATTTGTTGCGTGTTGGATGGCATATCAAGCAATTCGGGGCGGCGGGTCGGGTCTGCAGTTCTTGAACAACCCATTTGGAGACACCACTTATACAAAGGTCTTTGTGGGAGGCCTGGCCTGGGAAACAAAGAGCGAGACACTTCACAGCTACTTCGAAAAGTTCGGCGATATTCTCGAAGCTGTTGTTATCTCTGATAAGCACACCGGACGATCAAAAGGCTATGGATTCGTGACATTTA…
LOC108203367	CCTTTTCTTAATTATTCCCAGCCAAACGGCCCCTAGATATAAATGAGTTTACACAAACCCAATTACCCAAATAGGAAGCCCGTATCCGGGTATGCATACGATTGCAAAAGTAGATAAATAGGATTGAAATAAATTTTATATATTTGATCTCTGATCAATCTCGAAACCCCTGTTCCCTAAATCTGGAAATGGATCCACCAACTTCTTGGGACTCCTTGAGGAAACAGGCAAGGAGGCTTGAAGCTCAGTTGGATGATCAAATGCATTTATATCGTAAGTTAGTATCAAAAAATGTGGGCAATGGTAATGAGAATGACCTGGAAGCGGAAATAGATCAACTGCTCAAACAACTTCAATTAGTAAATTCACAGATGCAAGCGTGGGTGTCGTCCGGAGGAT…
LOC108205000	AATTTGAGGCACTCTTGGACTTGCTCTAAAGCTTTGTATCTACAGTGCGCCCACAGAGAAAACACAAGTGAAGTCCGAGCAGGAAGTCAATTCACTTGTGTGCTCTCGAATCATGGTACTATTCTATCTCTTCATCCTCTTTCTCTTCATACATCTTGCCCTAATTTAGGGTTTGCTTGCTTGCACTTCTCATCAAACACCTTCTGTACATATACATGTTTCTCCAAGTGCCCTATTCTTGTTTCTAACATGTTTTCGATTGCTTTGCTAGCTTAATTACGCCTTTTTTCACGTTTATATTTTTGTTTTTTGCTTATTTCTCGTGGGCTTCTTGCAAAGATGCAAACTTTATTGTTACTCAATAGTATAAGGATTTGACTTCATATGGACTTGAGCTGT…
LOC108205315	AGAATACATTGACGTTCAGTTACGATTTCATCCACATACATATTGGGCCGAATTTGTTGGGACATATAAATGTAAGCAGCCTTTGAGTATCGATTAGCCGTCAGTAGAAAACGAAGAGAAACAGAAGCAGCAAAGAAAAGAGATTAGGGGTCAAAAAGGAGAGATGGCGTCGCTGATGAGATGGTTCGCCGATCCCAGTAGAAATCCGCTCGCTAAGTGGCACCTGAGAGCTGTTGATCAAAGCCTCCGCAAATACGGTCTGCGTTATGACGATTTGTACGATCCTCAATTCTCTTTGGATATTAATGAGGCGCTCAATCGGCTTCCCGAAGAGGTAGTTCATGCTCGAAACCAGCGTCTCAAGCGCTGTATGGATCTCAGCATGAAGCACTCTTCCCT…
LOC108205315	AGAATACATTGACGTTCAGTTACGATTTCATCCACATACATATTGGGCCGAATTTGTTGGGACATATAAATGTAAGCAGCCTTTGAGTATCGATTAGCCGTCAGTAGAAAACGAAGAGAAACAGAAGCAGCAAAGAAAAGAGATTAGGGGTCAAAAAGGAGAGATGGCGTCGCTGATGAGATGGTTCGCCGATCCCAGTAGAAATCCGCTCGCTAAGTGGCACCTGAGAGCTGTTGATCAAAGCCTCCGCAAATACGGTCTGCGTTATGACGATTTGTACGATCCTCAATTCTCTTTGGATATTAATGAGGCGCTCAATCGGCTTCCCGAAGAGGTAGTTCATGCTCGAAACCAGCGTCTCAAGCGCTGTATGGATCTCAGCATGAAGCACTCTTCCCT…
LOC108205315	AGAATACATTGACGTTCAGTTACGATTTCATCCACATACATATTGGGCCGAATTTGTTGGGACATATAAATGTAAGCAGCCTTTGAGTATCGATTAGCCGTCAGTAGAAAACGAAGAGAAACAGAAGCAGCAAAGAAAAGAGATTAGGGGTCAAAAAGGAGAGATGGCGTCGCTGATGAGATGGTTCGCCGATCCCAGTAGAAATCCGCTCGCTAAGTGGCACCTGAGAGCTGTTGATCAAAGCCTCCGCAAATACGGTCTGCGATATGACGATTTGTACGATCCTCAATTCTCTTTGGACATCAATGAGGCGCTTAATCGGCTTCCCGAAGAGGTAGTTCATGCTCGAAACCAGCGTCTCAAGCGCTGTATGGATCTCAGCATGAAGCACTCTTCCCT…
LOC108205315	ACGATTTCATCCACATACATATTGGGCCGAATTTGTTGGGACATATAAATGTAAGCAGCCTTTGAGTATCGATTAGCCGTCAGTAGAAAACGAAGAGAAACAGAAGCAGCAAAGAAAAGAGATTAGGGGTCAAAAAGGAGAGATGGCGTCGCTGATGAGATGGTTCGCCGATCCCAGTAGAAATCCGCTCGCTAAGTGGCACCTGAGAGCTGTTGATCAAAGCCTCCGCAAATACGGTCTGCGATATGACGATTTGTACGATCCTCAATTCTCTTTGGACATCAATGAGGCGCTTAATCGGCTTCCCGAAGAGGTAGTTCATGCTCGAAACCAGCGTCTCAAGCGCTGTATGGATCTCAGCATGAAGCACTCTTCCCTTCCCAAGGACCTCCAGGCAAT…
LOC108205226	TGAAGACCAAAATCAAAGTTGCTTGATACATAAACACAGGGTAAGTATTTGGGGGCCTAAAATGGCGACCGGCGAAGAAGAAGAGAGAGTTTTGGAAGAACAGCTAGAGATTCAATTACATGAACACCGAGACTCCCTCTCTGCCATCTCCCATGCCCTTCTCTCCGACCCCTCCAACTCTGAACTTCTTGCGGTTCAAGAGGAGCTTGTTCAGGCAAGTAAAGATGCGGAAGATGGGCTTTTTCATCTCAAGCGTGCAAGGTTGTTGCGAGAGACTGATGTTGCCCTACAAGGTACCAAATCTACTATCGAGGATGTCATGGTTGAGTCTCTTGATACACCAGATCTCCAAGCAGAACCACTGAAAGATCCGAGTTATTCAATCGGATCTAAATGTAG…
LOC108207000	CATTTATTCAAATTTAATACATTTATTTTGCTGGGGAGAGACCGAGAGAGAGAGCGAGAGAGAGATTTGACGGAGGATAAGACGGGATGGTGGGAGGATCAAGCTCATGGTCGCGCGCGCTGCTGCAGATCTCACCTTACACTTTCTCCGCTATTGGTATTGCTGTTGCTATTGGTGTCTCTGTTCTTGGCGCTGCCTGGGGTATTTACATTACTGGGAGTAGTTTGATTGGTGCTGCCATTAAGGCTCCCCGTATCACTTCCAAGAATCTCATTAGGTTGTGTGTAGGAATCATTGGGAGTAGCTGCGCACTCTCTGATGCTCAAAACTCGTCACTTTTTGTGAAGATCCTTGTTATTGAAATTTTTGGTAGTGCACTTGGCTTGTTTGGAGTAATAG…
LOC108205367	ACCAGTGCCCTAGGGCACAGGGTAGACAACCCGTAATAAAATAAGGAAATAAAAATAGTATGGAGGGAATTTACACAACAATGTGACACAGCGAGTCAAGAATACCAAAGTAAGCACCATATCATAACAGCCAAGGCGAGTAAAGAAGAAGATTAGTGGGACGATGTCGTTTTGCTTCTCTTCCACGACCCTGTTCCGCTGCAAACCCACACATGAAAATACTACGAGTTGTCGTTTCAGAGCTGCTTCTGATGTTCCTGATTTCCTGTCTGCTAATTGGCTTGAATCTCGCAGAAAGAGGCCATTTGGTCCAAGATTAAGTTTTAGTGCAGAAGAAGCTGTTGGGCATCAGCTAGATGCCCTGATGTTCAATGATCAACCTCGACAAGATTATGGGAT…
LOC108222737	AAAGGCGAAAGGGGTTGGCAGTTGTGATCCGACGGTGGAGATACACTGCGTCAGATCAAAGCTAGGAGGCCATTTAAATTTCAAGCCTATTTATACCAAAACAAATTGCTCCTATATAATCTATACATACATACATCTCCAAACCCTAAATACAACTACTCTCACTCGATTTCTCACCCTCGCTAATGGCTTTGCCCAATCAGCAGACTGTTGATTATCCGAGCTTCAAGCTCGTCATTGTCGGCGATGGTGGTACAGGTACTCTTTTTATTGGTGTGGAAGTTCATCCATTGGATTTCTTCACTAACTGTGGAAAGATTCGATTTTATTGCTGGGATACGGCAGGGCAGGAGAAATTTGGCGGGCTTAGGGATGGTTACTACATTCACGGGCAGTGTG…
LOC108222737	AAAAAAGGCGAAAGGGGTTGGCAGTTGTGATCCGACGGTGGAGATACACTGCGTCAGATCAAAGCTAGGAGGCCATTTAAATTTCAAGCCTATTTATACCAAAACAAATTGCTCCTATATAATCTATACATACATACATCTCCAAACCCTAAATACAACTACTCTCACTCGATTTCTCACCCTCGCTAATGGCTTTGCCCAATCAGCAGACTGTTGATTATCCGAGCTTCAAGCTTGTCATTGTCGGCGATGGTGGTACAGGTACTATTGGTGTGGAAGTTCATCCATTGGATTTCTTCACTAACTGTGGAAAGATTCGATTTTATTGCTGGGATACGGCAGGGCAGGAGAAATTTGGCGGGCTTAGGGATGGTTACTACATTCACGGGCAGTGTGCAA…
LOC108222737	ACTGGATTTTCATTAGTGAGACCTGGCACACAATCAACTAAAGCATGCATAAAACAAATCCAGATAATATATCCATGAAAGAAAACTTTAAACTCATCATCACCCAGGAGACAGAATCAAATTAAATACATTACATCAATCCATTCCTAATTATCTCATGCCACTCAAAACCCTTAAAAATAATTTTGGAGGAGCAAATCCTCGCAAAAAATTTGGGGTACAAGGCTATGCATAAAACCGGGGCATCACCAAGCTACGCCCTCTATTCAAAGGCATCATCATCATCATCAGGGAGAGGCTGACTTGCAGCTGCAAGAAGCTCTGCTTCATGCCTGGAGAAAAGGACAATCACCACCACACATGAGAAAATATATAGAACTTTGGGCAAGTTTCATAGAA…
LOC108204244	TATGCAGGCGGCCCAATAGCACAGTCTTGGGTGTGTAACAACAACTAGTATTACTCAGACTCGGAACAGATCACTAACTTGGATCCATAAATCTTCAGAGATTCAATAACCTATTACACACACATCACACCAGTGTGTGTTTTGTGAAACAACAAGATGGACAAAGGTAAAGGATCAGGACGCAGATGGGCCGTTGATTTCATCGACAATTCTACTAATCCTTCTTCTCGTGATATCCCCGATCCTCTCGGCTTCTCTCGTTCTTCTCACGATCAGGATGATTCAACGTTGAGTAAGCAGAAGAAAGATGCTGAAGCTAATTGGAAGTCCCAGAAAGCATGGGAAGTGGCACAAGCTCCTTCCAAGAATTTGTTGATGATGGGCTTTATGATGTGGATG…
LOC108209866	GTGAGAGCAGAATATAAGTTATAAAGATAGGAAACAGGACCAGGCAAGACTGAGCAGACAAAATGGGGAGCAGACTAATGTTGATACAATCATCTCTCTCCATACACACATACAGAGCTATGGCGGGGGCAGTTTTTGCTTCTAAACCACTCTCTATATGTAGAGTGCAGCAGAAGCAGCAACGCCGCGGCGTTTCCGGTGCTAGGTCTAGTCTGGACCCTCCGGACCTCACTCGTTTGGCCCAAACCGCTCGCATCTCACTCACTCCTGCCGAGGTTGAAGAATTTTCTCCTAAAATTCAGCAAGTTGTGGATTGGTTTGGACAACTTCAAAATGTAGATCTTCAGAGCATTGAACCAGCTATTAGGGCAGATACTGAAGAAAGCAACTGGCGTGATG…
LOC108212698	ACGTCCAAGTAAAAGCGCTTTCTCTGTGTCTAGGGTTTTAGAAGGGGCAGCGAAATGGGGAAGCAAGAGAGAGTGGACGACTACAAATTTCTTCCAATAGCAGACGCTCTTATTGCAATTAATCAGAAGGTTAATCTCATCGCCGTTGTTGTCGACTCCACCATTCCCAAGAAATCCAAAGGCACCGATTACTATTGTTCACTAAATATCATTGATAAATCATGTCCAAGTCCAGGGATTGCTGTTAAGTTTTTTGTTGAAAATATGGGTAATCTCCCCCAAGTTGAGTGCAATGGTGATATCATTTTGCTTTCAAATATTTTGATGAAAACCCACAATTCAGAGGTGTATGCTCTTTTTAACAAGAGAAGTGCATCATTTGCTTTGTATGAAGGCAAA…
LOC108208525	AAAAGAGGATAATGAAAAAGGAGATCGAAAATAGAAATTGCGGAGAAAGGGATGGCTGCTTGTACGCACGATCACAGCTGCGAAGAACACGATTGTTCTTCCGATTGGTCTCTCTACAAACACATTGATCTTCCCAAGGTGTCTGCTTTGAATGAGGCTGTTCCAGGAAGTGTAAAGTCAGTTTTTAAAGCTTGGGAACAGCGTTTGAGTATTTCAGAGGGTCACTTGGAAAGCAACGAGGGGGATCCAGAGTTGATCGTTTTCATTCCATGTTAAGATCAAGAGCATTTCGATCATTGGTGGCAGTGATGGAACAAGTCCTTCTAAGATGAGAGCGTTTATAAATCGAGATGGTATAGACTTTTCAGACGCTCAAACTATGCAACCAGTTCAGGAATG…
LOC108204323	ATTTTTATAGTAAGCATTGTCAACATAAACGTTACGCATTTCATCGCCTCTCTCTCTCTAGATTTTCTCGCTCTTGCTCGTCTCTCTCTCTAGAAATCTCGATTATGGGTGCCGATGCAGAGACGCAACCCAACCACAAGGCATCCACTGAAGCTGCATCTGAGGAGAAGAAAAGGTGGACGCTTAATGACTTTGACATTGGGAAACCTCTTGGAAGGGGAAAGTTCGGTCATGTTTATCTAGCTAGGGAAAAGAGGAGCAATCATATTGTAGCGCTGAAGGTACTTTTCAAGAGCCAACTGAAACAGTCTCAGGTGGAGCATCAGCTACGCCGTGAAGTTGAGATCCAAAGCCATCTTCGACACCCTAATATTTTGAGACTTTATGGATACTTCTATG…
LOC108207584	TTTCTAAAAAGCTTCCAAGACCAAGAGTACATCGGAACAGTAAACCTAGTGAAGTTCTCTAAACAGACACACACAGTTTCTAATTTCTATACTAACTTCTCGGACTTTAAATTAATTTAGAGTTAAGAAATCGTTTAAAAAGTAAGTTGGCTCTAACAGAATTTAATATTGAAGCTGAATCTTGAATTTAGAAACTCAGTCTGCTCTCAATAGGTAACGTCCGCCCTATCTAATTTGTTATTTCTATATGTGACTTGTAAGTGTTTGATCAAAGTCCCCTGTGAATTGAAATGTTAGCAGCAACCCTAGAGGTTATAATGTGATTTCTCTTGTAAACTTGTCTATGGTCTGGAATCACTGAATTCAGCTTACATAATTTTCATATTTAAGTTGACTGAT…
LOC108201852	ATTCTCTGTATCAGAGAACAGACACATAAATACACACACGTAACATATACATACAGACAACAACTCAGCAGAGATGGAGGCAGCACCGGCGACGGCGACAAAAGTTAGCCGGAAAAAGGCCCAGCCCACGAAAGAGGGCATGAAAAGACCCAAGCCCACCAAAGTTTCAGTGGTGAGAATCAAGTACACAGACCCTGACGCAACGGACGACTCCTCCTCCGACGAAACGACGTCGTCTCCGAAGCAGGTGGTTCACGAAGTTCACCTGAGGAAAACAAGCCCCAAGTACCCAGGAGCTCGTTTGAGGAAATGGGGAAACTGGTGTGCTGAAATTAGAAACCCAATTACTAAGAGAAGGCAGTGGCTTGGGACTTACCCTACTGCTGAGGAAGCTTCCAG…
LOC108199450	GTAAAATTGATTTGCATATCAAACCGCCTGTTTAAAAACAAGATAAAAGGGGCTAGTATGTCGCGGCTTCAGTTTTAGGGTTCTCATTCTCACTCTTTCAGATCTCGGAGCAGTCGGTACGATTTGTGGGGTTTTCGGGGGTTTGAGCCAAGGAGATTTCGTGGGTTAAGTGTTTGAGGAATTGTCTGACAGAGATTAGGTGTTATTTTGGTGATTTTGAGGTATGGCGAATTTGGGGGGTGGTGCGGAAGCGCACGCTCGGTTTAAGCAGTATGAGTATAGGGCTAATTCGAGTTTGGTGTTGACGACGGACTCGAGGCCTAGGGATACTCATGAGCCTACTGGGGAACCTGAGTCATTATATGGGAAGATTGATCCTAAGAGCTTTGGGGATCGGGC…
LOC108205386	TTATGGTAGTTTAAAACTGCACGAATACGGAGGCTAAATTTTCTGTATATACAAAAAATCTCCGAGCTTTCGTATTTTTGTGGCGGCGTATAAAAATCTCAGCGTGCTTCTCTCTAAACTCCGGCGCACACACCCCTCCTATGGCGGCGCGTATACTCCCACGCGTCCTACCTATCTCATCTCTCTCCACTATCCGATCAACCACGCACTTAAAATCTCTCTCTCCGCTCTCATTCAACCGATTCTCGGTGTCATTTTCGTCCTCGATATCTTCGCTGTTCGGCATTCGCCGCCGGCGGAGATTTTTAAGCGACGCTTCGAGGAGCGGCGAGGAGTGGAGTGTAAGGAGAGGAGTATTCGCGGAGCAGCGAGGGTATCGGAAGCTGAGAAGGCGTGCGG…
LOC108215106	TTTTGAATCAATTTACGCAATGTTTTCTTTTTGAAGAGAATTTACGCAATGTTGTTTTATTAGAAATCAAATCAGCCTTGTTCAAAAGGGCATATTGTACACCGCATGAACCATCGAGATTGTTGTGTGTAGCTCTCAAGTTGCTCAGCTCAACTCTCAGATTTCTAACTGAGTTAAGTCTCTAGATGGCAAAAAAGGGATCCTCATCCTCAAGTAAAGCTTCTCAAGCCCCTGAGAAGAACGTAGTTGTAGAAAAAAATAAATTGTATCCTACAATACAAAAAACTGTTGGTAAGAGAAAGGCTGTAGATCCTAAAGTTTTTGGTGCCGAGATTGATGAAATATTTTCTAGCAAGAAGAGAAAGAAGCCCGAGACTGAAGACAAAGTGGTGGAAAATA…
LOC108203644	AAAAAGGCGTGAGTACATCGAAATCTTTTGCATCTAAATTGTAGAATTCTAGGGTTTTACACAGCTCAAACCCAAACCAAAACCATGGCGGAAGAGGCGCAATACGATGCATCCACTAACAAGCGCAAGTACGGCGACGAGTCCACCACGCCGCCGTTGACCGCTCGAGTCACCGGCTTCTCCGGCGGTCCCTCACCGGACACCACGGCTCCGTCGTACAATAGCGTTCCGCCGCCGGCAGATCCGATTCTCTTAGCGAGGCAGAAAGCGATGGAGCTGGCTGCTCGTTTCAGCGCCGAGGCAACGCCGGAGGGTGAAGCCAAGAGGCCGAGGTTTGAGAATGGGGATTCTTATGAGGCGCCTAAGACTTTTGTTTCGGGATTTAGTTCGGCTCCTAGT…
LOC108203644	GAAATCTTTTGCATCTAAATTGTAGAATTCTAGGGTTTTACACAGCTCAAACCCAAACCAAAACCATGGCGGAAGAGGCGCAATACGATGCATCCACTAACAAGCGCAAGTACGGCGACGAGTCCACCACGCCGCCGTTGACCGCTCGAGTCACCGGCTTCTCCGGCGGTCCCTCACCGGACACCACGGCTCCGTCGTACAATAGCGTTCCGCCGCCGGCAGATCCGATTCTCTTAGCGAGGCAGAAAGCGATGGAGCTGGCTGCTCGTTTCAGCGCCGAGGCAACGCCGGAGGGTGAAGCCAAGAGGCCGAGGTTTGAGAATGGGGATTCTTATGAGGCGCCTAAGACTTTTGTTTCGGGATTTAGTTCGGCTCCTAGTGATATAGGACAAAAGCCAC…
LOC108205727	ATTGTGAGTTAGAAATAAAGTGTGGGGTGTGTTTTTCTTCTCTTATCAACAGCATTAGTATTATCCTATGGTGAAGATGTTTGAGTGCTCACTTCTCAGTTCTCACTTCCTCCAACTCCTTACTAAACTTGTTTAACAACACACTTCCCACTCCTCCAGCTAACAATCTCACCGCTAAAATTGTATCATCAAAATCATCCTCCAATCATCATGATTCTCAAGCAGTTGTGAATCTCAAATGGGGGAGGAGGACGCTTGCATTCACCTCCACATTGTCTTTCCTACTTCCTCTTGATACATCTATGCCAGCTTTTGCTGCTACTGACGAGGACTCATACAGGGAGAGGTGAGGAAGGTGTTGACCAAGAGCAAGGCTCCTGGTGTACTACGTCTTGTCTT…
LOC108205727	ATTGTGAGTTAGAAATAAAGTGTGGGGTGTGTTTTTCTTCTCTTATCAACAGCATTAGTATTATCCTATGGTGAAGATGTTTGAGTGCTCACTTCTCAGTTCTCACTTCCTCCAACTCCTTACTAAACTTGTTTAACAACACACTTCCCACTCCTCCAGCTAACAATCTCACCGCTAAAATTGTATCATCAAAATCATCCTCCAATCATCATGATTCTCAAGTTGTGAATCTCAAATGGGGGAGGAGGACGCTTGCATTCACCTCCACATTGTCTTTCCTACTTCCTCTTGATACATCTATGCCAGCTTTTGCTGCTACTGACGAGGACTCATACAGGGAGAGGTGAGGAAGGTGTTGACCAAGAGCAAGGCTCCTGGTGTACTACGTCTTGTCTTTCA…
LOC108207640	TGAAGATGAAGATTTGTGAGTTCGGTTAAAGCCTTGTACTCAAACTCTCCAACAATTCACTTTTTCATCGGAATCATATTCTCTCCTTTCCATTAAACAAATAAATAATTATTATGATATACTATCATTTCAGTTCTGAGTGAATTGAAGAAAAAGAAGAAGAAGAAAAAGAAGAAGAAGTGCATTTGATTTGTTTGTCTGTGCTAGAAATGGAGAAAGTCAGAAGAGCATCTCACGCTGGTTCTTGGTACTCTGATAATCTTATCTCTATTGTGAGTTGATTTCCTGC
LOC108208296	TTGTACCTGTGAACCAATCCAAAAAAAATATACTCGTAGATGTGATCGAATAGACAGCGGTTACTCCGGTTAGTGAGTTGTGATGGAATCCAGTGGAGTGTAAGAAATAGCAGTCGCAGGCCAGGGGTTGATTAATGACCCACCGCAATAATGATGAGAACTATTGAGAAGGCGAGTCTTAACCACATAAATAAACATTCAAACTATTTCTTTCCAGCAACACGCATTATGTAATCTTTTCGCCATGGATTCCAACATCTCTCCGAGATCGAGTTCATTAACCCTAACCGAGAAGCTTTGCGCTGCTTGCGTTCCGCTGATATCAGTTATTGAGTTCATCATCTTCTCTATGCCTGCTTGTTGTGATCTTAAAAATTTCAGTCGTTACAAGAAGAATAG…
LOC108204362	CTATATTATAAAGGCTGTTGTTTTTTTACCCTTGAAATGACCATTCCACCCATGTGTATTTGTTGTATTTCCAGAAACACTTATGTACAATACCCGTATGTATACGTTGGTGTCATCCACACCTTCCTTTCCCTTACCAAAGCTCCACGTGTTGCCCATCCCTCTCTCTACGATTCTCTCCTCCAAAATCATCTTACTACATTCAAAATTTTCAAATTTAACTCCTTCCGCAATTTTTCAGTTGTAATACATGGATTCTTTAGAAAGAAGCCCTCTCAAGTCGCCGGCATAGGAGTTGGTTTCTGGGAAATCATCCAATACATGTCAAACTTTCAAAATTAATTGTAATTGTGGCAGATAGTACAAAAATGGGAACAAAGAAATCTTGGCTTCCAAAAC…
LOC108204362	CTATATTATAAAGGCTGTTGTTTTTTTACCCTTGAAATGACCATTCCACCCATGTGTATTTGTTGTATTTCCAGAAACACTTATGTACAATACCCGTATGTATACGTTGGTGTCATCCACACCTTCCTTTCCCTTACCAAAGCTCCACGTGTTGCCCATCCCTCTCTCTACGATTCTCTCCTCCAAAATCATCTTACTACATTCAAAATTTTCAAATTTAACTCCTTCCGCAATTTTTCAGTTGTAATACATGGATTCTTTAGAAAGAAGCCCTCTCAAGTCGCCGGCATAGGAGTTGGTTTCTGGGAAATCATCCAATACATGTCAAACTTTCAAAATTAATTGTAATTGTGGCAGATAGTACAAAAATGGGAACAAAGAAATCTTGGCTTCCAAAAC…
LOC108204362	CTATATTATAAAGGCTGTTGTTTTTTTACCCTTGAAATGACCATTCCACCCATGTGTATTTGTTGTATTTCCAGAAACACTTATGTACAATACCCGTATGTATACGTTGGTGTCATCCACACCTTCCTTTCCCTTACCAAAGCTCCACGTGTTGCCCATCCCTCTCTCTACGATTCTCTCCTCCAAAATCATCTTACTACATTCAAAATTTTCAAATTTAACTCCTTCCGCAATTTTTCAGTTGTAATACATGGATTCTTTAGAAAGAAGCCCTCTCAAGTCGCCGGCATAGGAGTTGGTTTCTGGGAAATCATCCAATACATGTCAAACTTTCAAAATTAATTGTAATTGTGGCAGATAGTACAAAAATGGGAACAAAGAAATCTTGGCTTCCAAAAC…
LOC108204362	CTATATTATAAAGGCTGTTGTTTTTTTACCCTTGAAATGACCATTCCACCCATGTGTATTTGTTGTATTTCCAGAAACACTTATGTACAATACCCGTATGTATACGTTGGTGTCATCCACACCTTCCTTTCCCTTACCAAAGCTCCACGTGTTGCCCATCCCTCTCTCTACGATTCTCTCCTCCAAAATCATCTTACTACATTCAAAATTTTCAAATTTAACTCCTTCCGCAATTTTTCAGTTGTAATACATGGATTCTTTAGAAAGAAGCCCTCTCAAGTCGCCGGCATAGGAGTTGGTTTCTGGGAAATCATCCAATACATGTCAAACTTTCAAAATTAATTGTAATTGTGGCAGATAGTACAAAAATGGGAACAAAGAAATCTTGGCTTCCAAAAC…
LOC108196398	TGTTAATCATGGAAGCATCGTGATTTTAGAGATTTTAGGGTAGTGGATGCTATGATCTGAATCTCCTAATTAAGGTAACTGAATAAGATTTGATTAGCTGGTTAATTACAATACGTATGGAAGCTGTATATTTACACATCATTACAAATCGATAAAACTACTTTAGATCGAGGGAACAAATCCAGCCATGATGAAGAAGAATTTCGATGTCAATCACGATCCATATGACGTTAATAGAGAGATAGACAGAGACTTCTGCATTCTCATATACCATTGACAATCACATGAAGATAATGTCAATCTTGATTGCTGGTAGTGTTAACTATAGAAAGATATATATGAAGATGTCAACCAAGTCATGTCACCATTTTAGTCTCAGAGGAATTCAATCAAAGTATT…
LOC108206586	TGACGTGGGGCCCATAAACACAACAATCGCATTTGGTGTATAAATAAAGACACAGGAGCAAAGAAAGAGGCACAATACTACATTTGGGGGTTTAGGGTTTTTATTATCAATCTCGTGTTGTGTCTGTTTTAAGTTGTATCAAAAGATGGGTGAAGATGGCAGCCGTTTGAAGGGTTCAGTCAAGTGGTTCAATGACACCAAGGGCTTTGGATTCATCACCCCTGACGAAGGCGGTGAGGATCTGTTTGTTCATCAATCTTCCATCAAGTCTGATGGGTTTCGCAGCCTCGCTGAAGGGGAGTCGGTTGAGTTTGTCATCGAGAATGGCAGTGATGGCAGGACCAAGGCCGTTGATGTCACTGGCCCAGATGGTGCTTCTGTCCAGGGAAGTGGAAGGGG…
LOC108206586	AGCAAAGAAAGAGGCACAATACTACATTTGGGGGTTTAGGGTTTTTATTATCAATCTCGTGTTGTGTCTGTTTTAAGTTGTATCAAAAGATGGGTGAAGATGGCAGCCGTTTGAAGGGTTCAGTCAAGTGGTTCAATGACACCAAGGGCTTTGGATTCATCACCCCTGACGAAGGCGGTGAGGATCTGTTTGTTCATCAATCTTCCATCAAGTCTGATGGGTTTCGCAGCCTCGCTGAAGGGGAGTCGGTTGAGTTTGTCATCGAGAATGGCAGTGATGGCAGGACCAAGGCCGTTGATGTCACTGGCCCAGATGGTGCTTCTGTCCAGGGAAGTGGAAGGGGAGGCGGCGGCGGCGGTGGTAGAGGCGGCGGCGGCTACGGTGGTGGCGGCGGCGGAT…
LOC108206586	AGCAAAGAAAGAGGCACAATACTACATTTGGGGGTTTAGGGTTTTTATTATCAATCTCGTGTTGTGTCTGTTTTAAGTTGTATCAAAAGATGGGTGAAGATGGCAGCCGTTTGAAGGGTTCAGTCAAGTGGTTCAATGACACCAAGGGCTTTGGATTCATCACCCCTGACGAAGGCGGTGAGGATCTGTTTGTTCATCAATCTTCCATCAAGTCTGATGGGTTTCGCAGCCTCGCTGAAGGGGAGTCGGTTGAGTTTGTCATCGAGAATGGCAGTGATGGCAGGACCAAGGCCGTTGATGTCACTGGCCCAGATGGTGCTTCTGTCCAGGGAAGTGGAAGGGGAGGCGGCGGCGGCGGTGGTAGAGGCGGCGGCGGCTACGGTGGTGGCGGCGGCGGAT…
LOC108206586	TGACGTGGGGCCCATAAACACAACAATCGCATTTGGTGTATAAATAAAGACACAGGAGCAAAGAAAGAGGCACAATACTACATTTGGGGGTTTAGGGTTTTTATTATCAATCTCGTGTTGTGTCTGTTTTAAGTTGTATCAAAAGATGGGTGAAGATGGCAGCCGTTTGAAGGGTTCAGTCAAGTGGTTCAATGACACCAAGGGCTTTGGATTCATCACCCCTGACGAAGGCGGTGAGGATCTGTTTGTTCATCAATCTTCCATCAAGTCTGATGGGTTTCGCAGCCTCGCTGAAGGGGAGTCGGTTGAGTTTGTCATCGAGAATGGCAGTGATGGCAGGACCAAGGCCGTTGATGTCACTGGCCCAGATGGTGCTTCTGTCCAGGGAAGTGGAAGGGG…
LOC108201168	AAAAAAATAACACTCTGTTTGGTTGGCCTGAATGGAATCATTTTAGCCCAGAATAGAATGGGCCATTCCATTCCAAAAATAAAAATTTCTGTTTGGTTGGCCCAAGGAATGGAATAGCCCATTCTTTTATTCATTCCAATCCAATCACTAATCAGACAATCGATTCATTTTTGGAAGTGCGGGTTAAGCCCATTCCATTCACTCACGAGTCACGCCCGCCTCTCTCACGCAGCTCTCCCTCGCCTCCCTCACGCAGCTTTCTCTCGCCTCTCTCCGCCCCTCTCTCTCGCCTCTCTCTCTTCCTCGCATCTCTCTCTCATCACTCCTTCCTCGCATCTCTCTCTTCTTTTTCTGCCTCTCCCCAGTCGCCTCCATTGCTGCTCTCAGACAAGGGCGATT…
LOC108222866	TTTTAAATATGAATTTCTAATTCTTGGCCTTGAAAATGTAACATAAGAAAACAAAACAAAAGCAGAAAAGCAAAGCATCCCCCATTTTCATCTTTCACCACCTTTCTCTCTTGAACATTCAAGAACCCCCCAAATAAATCAAACTCATCTCCCTGATTTCCCAGATGGGTTTCTTTCTATTCACCATCGCAATCCTCGCCACTCTTTCATCTATCACAGAAGTGGACTCAACATCGTTTAGAATAGTTAACCAGTGTAGATACACTGTCTGGCCGGGAATTCTCACCGGCGCCGACCGGCCCGTCATAAACCCCACAGGGTTTGCTCTAAAACCCGGAAAATCGAAAACCATACCCGCCCCGAATTCTTGGTCGGGTCGGATCTGGGGTCGGACCCTTT…
LOC108222866	CCGGTCCCAAGTGTGAACTCAGCTAGGGTGGCCGGCGGTGAAGCTCCGGCGCCGTTGCATTCTACTTGGCCTGACCCACAATCTCCGGTTGAGCAGGAGCCTGAACCGGATCCGTCGAATTTGCAGCCGGTTCGACCCCAGAAGCGGCCGGACCAGCCGGTTGGAGCTTGGAAAGAGCGTGAAGTGTCCTGGGCTAGCTCAAAACCGGTGCTTTCGAGAGGGGCTGTGCCTGCATTTGCAAGAATGCCGGGCCAGACTTTGTACTCGCATCTGTTTACAAATGTAAATGTGGCTCCAAATGTACCTATGCATACATTTACCAAATGTAATTAACAAGTTGAAGAAATAATTAATTAAAAATGTGACAAATATAAAGCTAGCTAGCAAGAATTAGTCCTG…
LOC108205160	AGTAACAACAAATTTACACTATATGTCCAAACTCTTTATTAATTAAAAATCACTTGTACAGGAAGGAGTTAATCGCTATGGCGATGGGTAGGCTAAAAGGTTATATGTGCAGATTGACATGAACTACATGGTATATTACATGGAAATCCAAAATAAAGGGGTTATACATTATGCAAGTGAAGTTCTGGCACTATGAGATATATGGTTTCTACTGATAGGGAGGTGAACATACACGTCATGAACTTCCTGCTTGCAAACGTTTCCCGTGTCCCTGTCTATTGCATAGCACACATATACTGTTTCGATTACATTATCCAGGACTTGAACAACGAAGCCGAGTACCAACAATAATAGGAGCCATGCCATAGCAGCAACGAAGTAAGAGTCATTCCCAATTCC…
LOC108210589	AGACAATTGATCTGAAAAGCAAGGCAACAATAAGGGTATTTTCCATTAATTAACAAAAACACAGCATGTGTTAATCATAGATTAGTTATTGGGGCATTATGTACATGGAGATTAGAAAAAAATTGATGTTAACAACTAACGAGTAAAGAAAAGCAACAAGCAGCAGCAGCATTATTCAAAATTATAAAGATTCCAAAACAAACTTTAGTTAATCCTAATCGCCTTGCTTAATCATTACTTAGCACGATCAGTAATGACGTCGAAACCCATCTCCGCAGCATCAGTTGCCTGTACTTCATAGCTAATTCCATCTAATGCTCTTCTTAATCCGTCTTTCGAAGTTGCATACAGAATTTTTGCTCTGATTCTTGATGCCGTGGGAGCCCTAAAACAACCATC…
LOC108201188	ACCTTCTCTCTTTGCTGTATATCTTGGTGCGTACACACATTTTTTCTTAGCGGCTGGAAGCAAAGCTTTAACCACACGCAGATTAACACCCTCATCACTCTCTTAACAAAGATTCAATCTTTTTCCAATCGGGGACCTTTACAGACAGTTTGTTGTGTGTATAATCCTTAAAGATTGAATCTTTACATTGATTTCAAGAAAACAAGGGTCTTAAATGAGCTAATTCACGCATCTAATCATGTGTGATCGCTGGTTGAGTCCAGTAATTTAAAGGGGTTTGTGGGTTTTTGTATGGAAACTCGTAGCCGCAAAAGGGCAGAGGCCCCTCCTTCTTCTTCATCTGGTGTGTCTACTCGTGCTTCAAAACGCCGTCGTTTAACCTCTGCTGTTGCTAATTCA…
LOC108201188	ACCTTCTCTCTTTGCTGTATATCTTGGTGCGTACACACATTTTTTCTTAGCGGCTGGAAGCAAAGCTTTAACCACACGCAGATTAACACCCTCATCACTCTCTTAACAAAGATTCAATCTTTTTCCAATCGGGGACCTTTACAGACAGTTTGTTGTGTGTATAATCCTTAAAGATTGAATCTTTACATTGATTTCAAGAAAACAAGGGTCTTAAATGAGCTAATTCACGCATCTAATCATGTGTGATCGCTGGTTGAGTCCAGTAATTTAAAGGGGTTTGTGGGTTTTTGTATGGAAACTCGTAGCCGCAAAAGGGCAGAGGCCCCTCCTTCTTCTTCATCTGGTGTGTCTACTCGTGCTTCAAAACGCCGTCGTTTAACCTCTGCTGTTGCTAATTCA…
LOC108201188	ACCTTCTCTCTTTGCTGTATATCTTGGTGCGTACACACATTTTTTCTTAGCGGCTGGAAGCAAAGCTTTAACCACACGCAGATTAACACCCTCATCACTCTCTTAACAAAGATTCAATCTTTTTCCAATCGGGGACCTTTACAGACAGTTTGTTGTGTGTATAATCCTTAAAGATTGAATCTTTACATTGATTTCAAGAAAACAAGGGTCTTAAATGAGCTAATTCACGCATCTAATCATGTGTGATCGCTGGTTGAGTCCAGTAATTTAAAGGGGTTTGTGGGTTTTTGTATGGAAACTCGTAGCCGCAAAAGGGCAGAGGCCCCTCCTTCTTCTTCATCTGGTGTGTCTACTCGTGCTTCAAAACGCCGTCGTTTAACCTCTGCTGTTGCTAATTCA…
LOC108202926	TTATGTGAAGTTGACATAAAAATACACACACTATATTTACACTATACATGTCCCATGCATTATTTTGCGGTAAATCTGAGAGTTGCCGACACTTTCATTGATTCATCACCCCATCTTTTTGTTGATTCTCGTTCCTCATACAAAACCCACTTTTTTAAACATTTTTAGCTTGTTAGTTTTAATCCCAGGTCGTTGTTTTTAATCAATGTAAGCTTAATCGTCACCATGTCACCTACCCTTCAATTATTAAATTCTTTATTTATTAGTTGAAGAAGTAGGTTCTTGATCTTTTGGCGCTACTTACATCTTTTTCAAAAAGATGATCATGTGCGTGCTTGAATTACATATCTATACAAATCTTAGGTATGTTTCCTTGGTGGGTCCTGCTTATTAAATCAT…
LOC108212135	TACAGTACATGCAACGCCACACTACTCTTTGTCCAACCATGATATCCAGCTATGCCCAAATCATCATTCTCTTTATCTTCGTATTACAAACCTCAGCACTAGCAAACAATGTTACAGATCAGCAAGCTCTGCTTTCGTTCAAGGCGGCAATAAAAGCTGATCCTTCGGGTGTGCTGAGGTCGTGGAACGATTCTGTCCACTTTTGTCAGTGGACTGGCATTACATGCAGCCACAGACATCAGAGAGTGACCGCGCTAAACCTCTACACCCTAGGCTTGGTGGGAACATTGTCTCCTCATATCGGAAACCTCTCCTTTCTCAGGAGAATTGACCTCATGGAGAACAACTTTCATGGCACAATCCCTAATGATATAGGCCGACTGTTTCGCCTTCAAGATC…
LOC108204798	CTATGGTCTCCAGGTGGCCTTCTTACTTCCATAGAGCTGCTTCCTAATTGAGTAGCTGCGTCAAGGCTCTACCATTCCAACTTTCCATAGTCGCAGGACTGATAACAAGTGCCTTTTACTTTTACCATTGTATATGCATATCGAAGATGTGGTTGCCTTTTGAGTATATATGATTATATACCCTGTAATTATTGTACATGTATCTATATATGGGCCAGAAAAGTTAACAGTTTAAAGTTCTCCCAGCTAATATATTAATGTTCAAAGATTTGTTTCTCTCGTTTCGGTTTCATGCTTAGTTTATACTGATTCCTTTTAGTCAAGCTAGGATAAATGGTTTTCTTGCATTTTAAACTGCAGGAGACCTAAAGAAAAAAGGGAAGAAGTTGTTGAACCAGA…
LOC108204288	TATCATTGACCCTATATATGTAAGTATGTATGTATCTATCTTTGTGTGATACATATTTCATTTTATCTTTCTCCTTGTATTTTTCCTTGCTTTTTTCTCTCTGCAGACTCTACCTCCAAAGCAGGAGGGTTGTGGAGCCCATTTCTGGTCCTCTGCTTTGCTGGATTCAAGCTCTCTAGTATTGGTTTCTTAATGATGTTTGTCTGCTGAGAGATACCAGACTTCTCACTTGACCCAATCACTTTTATTACACTTCCATCCTCACCTTGTTCAAGAGAAACACAACCTAAACTCAACTAGTTCGATTTCACTTTTTCTTGTTGGGTCCTCAGATCTGTTAGATTTAGTTTCAGATCTTCTTGTGTGATTCAACTTCTAAAGAGTTTGGTGCAAGTAGAA…
LOC108204288	TGTATCTATCTTTGTGTGATACATATTTCATTTTATCTTTCTCCTTGTATTTTTCCTTGCTTTTTTCTCTCTGCAGACTCTACCTCCAAAGCAGGAGGGTTGTGGAGCCCATTTCTGGTCCTCTGCTTTGCTGGATTCAAGCTCTCTAGTATTGGTTTCTTAATGATGTTTGTCTGCTGAGAGATACCAGACTTCTCACTTGACCCAATCACTTTTATTACACTTCCATCCTCACCTTGTTCAAGAGAAACACAACCTAAACTCAACTAGTTCGATTTCACTTTTTCTTGTTGGGTCCTCAGATCTGTTAGATTTAGTTTCAGATCTTCTTGTGTGATTCAACTTCTAAAGGCCAAGGTCAGATAGTTATGTTAAAAGCTCTGATGCCGTTGGGCGCCA…
LOC108219438	TTCCAGTTAAACTAGTTGGAGCCCATCCGACTCAAATCAAAGCTCTAGGTTAAAACATCCAACTTGAAGTGAGCTAAAATTCGACGGAAGTCTAACCAATTTTGTTTCATTTTAATGTCATAATAATTCATACAATCAAACAGTGTGACCGGAATAAGTTGCGGGGAAGTCTAATTTACTGGCGTACCAAACGAGGCCACCGCTGTATAGGCTGTAGCGGCAGCACGAATAAAAGCGAGGCGACATCTCTTCCACATAAGCCTCCCACTTGTTTCTCTCTCAGTCATTTGTTCAAAATGACGACGCGAGAGAGATGCACAATAGAGTGCCCCAATGGGATAAAACTCGACGGTTCTGTTTTCAAACCTGAGAAGAAAAATGATACTATAGGAGTAGTTC…
LOC108219438	TTCCAGTTAAACTAGTTGGAGCCCATCCGACTCAAATCAAAGCTCTAGGTTAAAACATCCAACTTGAAGTGAGCTAAAATTCGACGGAAGTCTAACCAATTTTGTTTCATTTTAATGTCATAATAATTCATACAATCAAACAGTGTGACCGGAATAAGTTGCGGGGAAGTCTAATTTACTGGCGTACCAAACGAGGCCACCGCTGTATAGGCTGTAGCGGCAGCACGAATAAAAGCGAGGCGACATCTCTTCCACATAAGCCTCCCACTTGTTTCTCTCTCAGGTGCCCCGATTGCTGGATCCGCGGTTGATCAGGTAGAGGAAGTTGCTGGTTATGTTAGTTTGGGTTATCCGTTTGGCCTGACTGCTTCTATTCTCTTTGGTAGACATCACAAGGCG…
LOC108219438	TTCCAGTTAAACTAGTTGGAGCCCATCCGACTCAAATCAAAGCTCTAGGTTAAAACATCCAACTTGAAGTGAGCTAAAATTCGACGGAAGTCTAACCAATTTTGTTTCATTTTAATGTCATAATAATTCATACAATCAAACAGTGTGACCGGAATAAGTTGCGGGGAAGTCTAATTTACTGGCGTACCAAACGAGGCCACCGCTGTATAGGCTGTAGCGGCAGCACGAATAAAAGCGAGGCGACATCTCTTCCACATAAGCCTCCCACTTGTTTCTCTCTCAGTCATTTGTTCAAAATGACGACGCGAGAGAGATGCACAATAGAGTGCCCCAATGGGATAAAACTCGACGGTTCTGTTTTCAAACCTGAGAAGAAAAATGATACTATAGGAGTAGTTC…
LOC108209069	AACTCAAACACTTGGCAGGAATAACACAAGTTACACAATAAACAGCAGCTACTCCAAATTACCGCACAACAAATGGGCTCTCCATGGTCCAAACTCCGACCCCCATAAATATAGATGCTGCGTACGTGGCACAAACAATCACCAATGGGCCCCACGTGAGTCCCCTCACTTGTTATTGTCGTCAGTCTACCACTTGTAGATAATCAAGAAGGACTGTAGGTAAACATTTGCACAACACTACCTTAAAACAAACCTCAATTATGTACCTGTTCAAGTTATTGTATCTAGTTTTTGCAATATTATTACCACCTATATCTTCATCTTCATCACCTTTTGAAGCAATTGAGTCTCTAAGCAAACGTTTAGACACACAAAAATCATCTTCATATGTTCAAGAAC…
LOC108209759	TAAATAAGTGGTTAATACAAGAGAAATAACTCATCACCACCTATTCTTGTTTATTAGTAACAAAATATTTCAGTGAAAAAATGGCCAGCCTCATTGCTCCTGAGGAGTTTTCTGCTGTTGCTGATGCTGAAGCTCTTAAAAAGGCTTTCCATGGTTGGGGAACAAATGAGAAGGGTGTAATAGCAATACTTGGTCATCGAAATGCAGCTCAAAGGAAGATGATCTGGAAAGCTTACGAAGAAAAATATCAGGAGAATTTTATCAAGCGCCTCGAATCTGAGCTCTCCGGACACTTTGAGAAGGCAGTATACCGTTGGGTTTTGGATCCAGCTGATCGAGATGCAGTGCTAGTAAATTTAGCTATAAAGAAAGTTCCGGATCCTCGTGTGATTGTTGAGA…
LOC108222966	AAAGAAGAAAAAAAAGCAGCAGAGGCTATGGGGTTTTTCCATGCTCAGCTTTGGAAGCTGAAACACTCAAAGCGATCCAAAGGGATTAGTTTGGACAAACGTAGAATACTTATGTGCTTTGATACCAAGACCGACATACTGCGTGAAATCTCATTGCCCAACTATGTTCCATATACGCCTGGTAATCCTATTATTCATCTATTTGATCAGTATATTGCTTACTTTGTTTGGGACAGCGGATATGATTATTTTGACATGTGGGTATTAAGATACAATTCCATAAATGATTTTTTTTGGGAGAAGAAGATGAGTATTAGTCCAAATAAAGATATTCGTGTGGAGGTCTTGGGTGTAAGGAACAATGGTGAACCAATTCTTGCAAGATCATATGACTTGATT…
LOC108204423	AGCAGTGCAAAAGCAATACTGATACAAAGAATGTCATCTTATTATCACAATTCTTTTTAAACATGTATAGGATGCTAGAGCCTTAATTTTTGATGACCATGTCTTGGTCCACTAGTACCATGCAAGAGGCCTTCAGCCCCCAGACCTGTAATTGAAGAATTGCTGTACTGGTTACCAGATTTTCTGAGGATCATCATAAAAACTTAAAATATTGTAATAATACATTGTGTTTCAAGTATATACAGCTTGAAAGTGAAGCTCCAAATCTTCATGTATGCTAATAGGTAGCAGAAACATGCTCACGGTCCTCAAATTTCCTCTATAGATTTTCTTTGTTTTGAACATCAGAGTGTTGCTCGAGTTTGTTTCTTGTGTACAGGTGGATAGACAAAAGTATAT…
LOC108204423	ACATGCACTTGCATGACACGTTAGTACACATTTCAGCCATCCATTTCAGCCACGTGGCTTTTATTTCTCTCTGCAAATCTATCTGTATATTTCTTCACTGCAGCACTGCTTGAAGCTTTGCTTGGGATTTGCTGTCTCTTGATTGTTAAGGAGGTTTTGGTTTGTGAAATTTGGATATGTTTTGGCTATTTCTTGATACTTCTTGAGCAATGTTTGATTGGGATGATCAAGAGATATATTATGGGCTGGGGCTGAGGACACTAGTGATCATATCGTACCATTTCCTCGTGGATGTGAAGAACTACCTGCAGATGTGCCAGGGGATCTTATTAAGACGCCGCAGAATGAAGAGATTGCCAATGGGAAAATGTCTAAGCAGAAGAAGCCTGTTTCCTCGAG…
LOC108204249	CAGTGCGAGTGGGCAACTAGATACACGCTCGTATGCCTGCCTTCTGATATTCATTGTTTCACTTGAATTATTTTCCGAAACTTAATAAACCCTGCGTTATGGCGGAAGAAGAAGAATCATCAATCCCAATGCACACCGACGAGCCATCAAACACTCTCAACAACGACAACGGAGACGACGCCATGTCGGACCCTAAGAATGGATCCGAATCCGATTCAGAGTCCGATTCAGATGATGAAGCCGTTAAGCTTCAAATCCAAACCCTAGAATCTGAACTCTATGCTAATCCCTCCAATTACGATGCTCATGTTCAATATATAAGTGCTTTGCGGAAAGAAGGAGAGATTGAGAAGCTACGAGCTGCTAGAGAAGCTATGAATGAGCTGTTTCCGCTGACTC…
LOC108203679	GCCATACTGATGCACAACACATTCAGAGAGAGAAAGCCAGGGGTCGTGTCGGCTTCCACCAGGCAAAGACCATCACCGATCTGTATCTATATATCCCACACATCTGGTTTTGGAGCTCAGATTGATCCCCAATTGTAGTTGGTAATATCATTCCGAATTTTGAGGTTAAAGATAAGGAGGGTTAGGAGGATATTGTGTATTGCGTGAAGTTGTTCATGCTTTTTGGGTGATCTTGCGTATTAAGACTACAAAGACGTTAAAGTCCTCGAGAAGAGCCAAAACTTTTTTGCTGCATTTAAGGGAGAAAGGAGTGAACAACGTCATACTTGTTTTCAAGGGTTTTTGACTAGGGGCATAAAATTCCTCTGTTTAGCCTCCTAGTTATATTTGCAAAGCCTT…
LOC108203679	GCCATACTGATGCACAACACATTCAGAGAGAGAAAGCCAGTACATTTAATAATCAATATAGATCACCAAATTTATTATTTAATTTTTCAACATATAATGTACTCAATATTAATTGCAGGGGGTCGTGTCGGCTTCCACCAGGCAAAGACCATCACCGATCTGTATCTATATATCCCACACATCTGTATCTATCCACTTCCCTCTTTTCTCTCTCTTTTTTCTTTCAAACCCTAATTATTTTCCATTTTTAAATATAACAATTGTTTAATTCTACTCAAAAGCTTCTATCTTTGTTCTGATTGTGTTCAATCTTCAAATGGTGTTTTTTTCTAGGGTTTTGGAGCTCAGATTGATCCCCAATTGTAGTTGGTAATATCATTCCGAATTTTGAGGTTAAAG…
LOC108205227	ACAAAGGTAAATTTCATGCAAATCTGTATAATTTTAGCTGTGCTTAATACCTCTTATCATCTGCAGGACTGCAGCCCATTTTGTCACTGTATGAATATAAAGTTTGATAAATAGCATTTGCAAAGAAGTTGTCGCCAAAAACTAGTACATTCACATTACATACAATACACTGCTAACAAACATGAGCTTTTAACATAATCAGAGAAGTTAAAACTTGTATTATCAATCATCTAACCAGCGACGAAACCACATATACAGAACTGTGCAAGGCCACGTGTCGAGAGAGGAGAAAGTCGATCGACAGGTCGACACGTAATAACAAAACCCCCCGAACTTTTTGACAATTACAAATTTACCCGACAATCGGACTACAAAAAGTGAAGCCCCCCCAAATTTCCT…
LOC108205227	ACAAAGGTAAATTTCATGCAAATCTGTATAATTTTAGCTGTGCTTAATACCTCTTATCATCTGCAGGACTGCAGCCCATTTTGTCACTGTATGAATATAAAGTTTGATAAATAGCATTTGCAAAGAAGTTGTCGCCAAAAACTAGTACATTCACATTACATACAATACACTGCTAACAAACATGAGCTTTTAACATAATCAGAGAAGTTAAAACTTGTATTATCAATCATCTAACCAGCGACGAAACCACATATACAGAACTGTGCAAGGCCACGTGTCGAGAGAGGAGAAAGTCGATCGACAGGTCGACACGTAATAACAAAACCCCCCGAACTTTTTGACAATTACAAATTTACCCGACAATCGGACTACAAAAAGTGAAGCCCCCCCAAATTTCCT…
LOC108205227	ACAAAGGTAAATTTCATGCAAATCTGTATAATTTTAGCTGTGCTTAATACCTCTTATCATCTGCAGGACTGCAGCCCATTTTGTCACTGTATGAATATAAAGTTTGATAAATAGCATTTGCAAAGAAGTTGTCGCCAAAAACTAGTACATTCACATTACATACAATACACTGCTAACAAACATGAGCTTTTAACATAATCAGAGAAGTTAAAACTTGTATTATCAATCATCTAACCAGCGACGAAACCACATATACAGAACTGTGCAAGGCCACGTGTCGAGAGAGGAGAAAGTCGATCGACAGGTCGACACGTAATAACAAAACCCCCCGAACTTTTTGACAATTACAAATTTACCCGACAATCGGACTACAAAAAGTGAAGCCCCCCCAAATTTCCT…
LOC108205304	TTAAATATGATAAAACTTCACATATAGTGTAATCAGATTAAAGTATTAAAACTTTAAATATTTATGCCGTTGTATCCATCTTGCTGATTCTCAACGAGCTTCAAACCTCAGCCGAATCTACCATTATCAACGATTATCTCTCCAACTATCTTCAGCAAATTTAAACCTCAATTTATCTAAATAAACAGGTTTTTGCAAGTGAATCATGGTACACTCGTGGTGGTGGGGGAAGGATGGAGGCTATCGGTTCCTCATTAATGGGTGTAAGATAGGATATAGGTACCAGCAGAGATGCAGTTTGGTGAATATAAAGTTCAAATGGGTAAAAGATAGTGTGTTGGATGCTGTTGTGGCTGGTGGTAGGGAACTCAAAGCAGCCTGCATCCTTGTGTCCATCAT…
LOC108203610	TCCCCCTTTTTAAGCTATAGAAACTGCTGTGCCCATATATTATCAGAGCTAGGGTTTTGCGAGAAAAGAGCGAGAGAGAAATACAGGATTGGAAAAGATGGGAAGATACCGAGAGAGAAGCCGTAGCTACAGTCCCAAACGTTCTCACCGCGACTACGACGACCGTTCTCACCGCGACCGCGACCGCGACGACCGTTCTCACCGCGACTACGACGACCGCTCTCACCGTGACCGCCGTCCTGTTCGCGACCGCCGATCTCCGGGTCCCTCCGGTCTTCTCGTTCGCAACATCTCTCTCACTGCCAGGCCTGAAGATCTTAGGATTCCCTTTGAACGCTTTGGTCCTGTCAAAGATGTTTATCTTCCCAAAAATTATTACACGGGGGAGCCACGTGGATT…
LOC108203610	TCCCCCTTTTTAAGCTATAGAAACTGCTGTGCCCATATATTATCAGAGCTAGGGTTTTGCGAGAAAAGAGCGAGAGAGAAATACAGGATTGGAAAAGATGGGAAGATACCGAGAGAGAAGCCGTAGCTACAGTCCCAAACGTTCTCACCGCGACTACGACGACCGTTCTCACCGCGACCGCGACCGCGACGACCGTTCTCACCGCGACTACGACGACCGCTCTCACCGTGACCGCCGTCCTGTTCGCGACCGCCGATCTCCGGGTCCCTCCGGTCTTCTCGTTCGCAACATCTCTCTCACTGCCAGGCCTGAAGATCTTAGGATTCCCTTTGAACGCTTTGGTCCTGTCAAAGATGTTTATCTTCCCAAAAATTATTACACGGGGGAGCCACGTGGATT…
LOC108203614	TTGTAGTTTTGCTATGAACAAGATGAAATTGTAGTTTTATGCTCTATGCTTGTATATGAAGTGAAGAACTGAAGATAAATATATAAACATTTGAATGCCCAGATGAATTTCTGCCTCCGCTTCAGCGGTCTAATTGTAGCCAGAAAACCCCTTCTTCTTGCAGCGGAGCTCAGTGCTACACGACGTCGTAATACACTGAAACGAGTGGACAGAGAGCTCTCCAAAGGCAATTACAGAGCAGCTCTTTCTCTTGTCAAATCTTGTGGCCTTCGTGGTTTTGGAGCTGCCAAACAGATACAGTCACTTGATGATCTGATCATCGAGAGATCATACACACCATCATTGCAAACGCGCCTTGATTTGATATTGGATTCTATCAAAGATAGCATTCGATTTACT…
LOC108212597	CTATATAAATACCGAATCAAAGTCTCTTAAATCACATTTTGCATTCAAATTTTATGAATTTACATAGAGAGAGAGAGAGAGAGTTGAAGCATTCCGGTCAAAATTTTCAGTCAGGTTTGTAATCAGTTATCGAAGCTTCGGAGCTGGATTAATCGATGGCGAATGTCACGGTTTGTGCGAGATTTAGGCCTTTGAATTCTCGCGAAGCTGATTGCGATGATCTCTGCATTCGAGGCCTTGATGCTGAATCATTCATTTTTAAGGATGAGAAAGATGAGGAGTTAAAATTTAGCTTTGATAGAGTGTTCTATCCAGAATCAGAACAGGCTGAAGTGTTTGAATTTGTAGCTCTTCCCATTATTAAAGATGTGTTTAATGCTGTGAATGGGACAATCATCA…
LOC108205439	ACATGTCGTATTTTGTCAAATAAAGAGCCGATACTACAAAAATAAGAGTCAAGAGTACCTCTTTTCTTAGAATTATTAAATGCACCTTTTGTGAATTCTTTAGGCAAGTTAAATGCAGGTCTTGTTGCTTCCTCAAATGCTACATTCTCCCCATACACGAAACACACTCCTCATCTAAAACCCTACACACACTTCCTCCTATTTATTCTACTTACCAGTGTTGTCTACTCCCTCACTTTTTTCAGCTGCTACATTTCCATTTGCTCCACAACAATGAGCAAGCAAGATTTCATGAAGATGCAGAGCTGTGTTCTTAAAGTCAATATACATTGTGATGGATGCAAAAATAAGGTCAAAAAAATATTGCAGAAAATTGATGGAGTGTGTTCTATAACCATA…
LOC108212320	TTTCTGAGAGGTAGACATGGCACCTTCTTCAATACTTTGTTCTTTTATTTTCCTTATAATTTTTTCACTTTTTTCCTTGCAAATTTCTGCCGATAGCCCTCGGCGTTTCGTTCAATGTTTAAGCAAACACTCTCAGAACTCAGAATCTATTACTCAAGTTGTTTTCACCCCAGCCAATGCCTCATACAATCCAATTTTGCAGCTAAATTTACAAAACCTTCGCTTCAATACTTCCGGAACACGTAAACCCGAAGCCATTGTTACACCAGTGGATGAATCACAGATCCAATCCGTGATTTACTGTGCTAGAAAGAATAACATGAATGTTCGGATTCGCGGAGGAGGCCACGACTTCGAGGGGGTTTCTAATACTGCTGCAGTGCCGTTTGTGTTACTTGA…
LOC108204305	GTATGTATACTACATTCGACCGTTGGAACATAAGTAGGAGTATCCGTTACACCAAAAGCAAGTTCATCATGTTCCCACATTAACAACCCCATTGCCTTCAGTTTACAACTACATTTAATTCTACAGATAGTGTGAGAGATTTTAGTGATTGATTGATTGAAAATGGTTGCAAGAAGCCCACCAAAGCTCAAGAAAATGGTGGCTCCTCTCAATCCCACCCTTCTCAGAGAAACTGTTGACAAGGTGGACAAATGTGTGGCAAGATTACAAGAGCTTCAATACACAGTAACAGGAGGGAGAAAAGTTATATCTGGCGTGAGTTTGAGTCCACGCAGTACTAGAGTCTATTTAAAAACTAGTCTCAGATGCAAGCAAGAGTCTGCAAGGATCCGGAATGCT…
LOC108204287	ATTAACGGATAGATTTCTCAATTTTATTGTGCGGAATTAAAATGAATTGGCTGGACCCGCCATGTCAGTTCCATCCTGTCATCATCCATCTCACTCTCATCTGATCTGATCATAACACTTCTCAGTTCTGTCTCAAAAACACACACGCACAATCACATACTTTCAGTTCTCATGTTTCCGTAAATCATCAGCAAAACAAATGGCGAACATAGGGAAGAAAATTCTGAATAAAGGATGGTTAGCTGCACGGTCAACGGAGGTTGACCTCACCGGAGTAGAGCTGACCACCACTCATCCTCCGTCCTCCTCACCTACTTCTCTTCCCTGGATGGAAGCTTGTGTTCCCGGAACTGTACTGGCAACGCTTCTAAGGAATAAACTCATACCTGATCCTTTCTA…
LOC108211579	CTTGGTCCGGGTTCATATGGTTATTAAGGTTATCGAGATGCACAGCCACTATTTTACTTTAATGATGTTGAAAAGAGAAAAGTAAATCAGTTCCTATAATTCAAAGTTGTCGCCACTTTTTTTTTGCTCGTACACAGTTGTGCACTCTCACTCTTCCGTCTCACTCGCGATTTATCTATCAGGAACTTAGTTGCAGTGCTACATCAAGGAGCTTGTGCGTTCACATATGTGTATATATAAATATGACAATCCCAAACTTTTTACTCTCAAACCTTCTTCGCCACTCCAGATCTTTGGATGTCCCCGAGTCAGGGTTAGGTACACAAATTGGGGAACAAATAATTAGTGGCGATGATGCCATTCTTCCGGTTCAGGCACTCATTTCGATGCTTGATGGCT…
LOC108212762	TTGATCACTAAATAAATAAATAATTAACTCAATTCAAAATGATTTCGAATTAATTTCGAATCCCAATAACTCTCCTGTTCATCATCATCATCTTCACAACAATCGCTTAAACGACACAGTTTCAGCCCAACAAACTCCGATACGCTGCCGTTTGTAAATATCCTTGATTCTCGGACTCCCATGGCTACTCCTGCACAAGTTGGAATGGAGATGGAGGGTTTTGCAATTTATGATGCAAGGATGCAGTTAAAGAATGAGAGAAATTTCATGATGTCTAAACTGATGCTTTCCACTTATGAATAATGAATGGGGAGATGCACACAGTGGCAGCCGCTATAGTTCAAGCATGTCTCTTACTTGCTGCTGGGTCCAAGGGTAAAAGATTTATGATGCCATATA…
LOC108212762	TTGATCACTAAATAAATAAATAATTAACTCAATTCAAAATGATTTCGAATTAATTTCGAATCCCAATAACTCTCCTGTTCATCATCATCATCTTCACAACAATCGCTTAAACGACACAGTTTCAGCCCAACAAACTCCGATACGCTGCCGTTTGTAAATATCCTTGATTCTCGGACTCCCATGGCTACTCCTGCACAAGTTGGAATGGAGATGGAGGGTTTTGCAATTTATGATGCAAGGATGCAGTTAAAGAATGAGAGAAATTTCATGATGTCTAAACTGATGCTTTCCACTTATGAATAATGAATGGGGAGATGCACACAGTGGCAGCCGCTATAGTTCAAGCATGTCTCTTACTTGCTGCTGGGTCCAAGGGTAAAAGATTTATGATGCCATATA…
LOC108205012	GGCCACTTATGGTGTAGTGATAGTAATAACATTCCAATGCACTCCTCATTTCTTGAACAGGGAAGCAAAGTACATATGTAACAGCTAGTGACTATTTCCGCTAAGGAAATCTCATATGTCATAAGGAGGACGAGGGCTCTTGAATCCGATTCCGCTTGCTTTCTCATAGAGCTGATCAAGTAAGCTCATAGTGGAGTTGTTGTGTACCTTAGAGCCTCAACGCCGAATTATTGGGAGGTCATATCGCAGAGTCGAGTCATGTATTTATGGTCGAAAT
LOC108207979	CAAACGGGCCGTCAATCTATTCGGGTCGACCCAAATCAACAATATAAGCCTATAGTTCTTCGCTTTCAATCTGGAACTAATCATATCTTTTGCTGTTCCCATCAAGTTTAAAGAAAAGAGAACAAGATGACTACTGCGGCTCGACCAACCTGGGCACCTGCTAAAGGAGGGAATGAACAGGGCGGTACCAGAATTTTTGGCCCTTCTCAGAAGTACTCTTCAAGGGACATTGCTTCCCACACCACACTAAAGCCCAGAAAGGAAGGGCAAGACACTCAGGAGGAACTGCAGAAGAGGAATCTTCGTGATGAGTTGGAGGAGCGTGAGCGAAGACATTTTTCGTCTAGAGAGGACAAAGATCGTAGGAAGGGAGGGCATCTGCTCTTGGAAGGTTCAAAA…
LOC108205477	GTGAGAAAAAGTCTTTGGCCGAAGCCAAACCAGTTCGGGTTGTGGCAACAATGGCAAACATTGGGGTTGCGGACTAGGACTAGAGGAATCGTAGGGCTTGCAGCGTTGGAGATTCAGGGAAATGGAAGAGGGTAAAGCCATAAAGGGCAATTTTTTAGATCTTTCCAATGCCGGATTTTAATCTGGCTTAGTATTCCCATCGAAGATATTCAATAGTTAGTGGCATGAGTTAGCATGGTGTTTATTAATCAGAAGATGGCTAACACCTAGAAGTCTGAAATCAGTTAGGTAAAGACTCCCATCTGGATCCAAACTCTGGGCTTGCCAAATGCGCAATATGCCAAGTGGATCAACCATCAAGTGATTGTAACTCTGACAACTCTGAGACCATCTTCTTGT…
LOC108205477	AAGACAAAAGACATTAGTAAATAAAGTAACAATAGTCCATGAGGAAGACTTTGGTCCTAACCCCGCGATTTTCGCTTAATCACCCTCGAATTTCTCACTAAATTATATCAACATCCATTTTATCATTCTTTCCCTTTGTTTTACTGGGTGTTTTTTTGCAATCATTGTTGCTCAGTTTCTTGCTATATTTTAAGATTTTTGTTTACTGTTTTCAGTGCTTTTTGAGCTTCGATCCATTGATGCCTCTTTCTTGGTTTGAAATTGAGATTAAGGTGATGATATGACATAGTGAAAGTAAGATGAGCCGGACTGAAGTGAAAACCAGGCCACCTCTTGTTCCACTCGGGACTTTACTTGGTCGTGAGTTGAGGAACGAAGGTGTTGATAAGCCCGCCATTA…
LOC108195588	TCATCCTTTTCTGTTGCCGGAATTCGAGAATGAGATTAATAAATTTTCATATAATTCCTTTTTATCTGTTCTAAGTATTAGTATTCCAGAATTATTATTATTTAATAAATGATGTAGCTTCATTTCATAGCCAAGTATGAAGTAGCAATACTGAAGTATGAGATAAGAGCACAGCAAAAAACAAAACAGAAAGCAGGGGAGTGGAGAATATCAATATGAAGATCATGGCTGCTTCTGCTTGTGCATATACACACACTTTATCATCCTCCACTCTTATCTCATCTTCTTCATACATTCATACTCAACATTTCCACTCTCTCCCCCCAAAAACCAATCTTTTGACCTCTCATAAACTCCCACTACTCATCACTTTAAAAGCCAGTAATACCCAAAAAAGAT…
LOC108223009	CAATATAACTGAAGCCCAAATAGTAGATTAACGATCCAGAAGCCCGTATATACTTACACCTATACACACAGCAGCGCCGAGTCCTAAGAAACACAAAAACAATCCCAATGGAGCGCGCAAACAACAAACGCAGCCGTGAAGCTGCCGGAATCAACGCCGCCGCCGACGACAACATTGACCTCTCACTCCTCGAAGCCGTCGAGAAGTCGCAAAACTCCATCCAAGTCCTCGACGTCAAAACCCTAAAACGCCTCGTCCTCGCCTTCGAGCGCAAGTTCCGCGACAATATCGCCGCCCGCCTCAAATACCCCGACAATCCCGAGAAATTCGCCGACTCGGAGCTGGAGCTCCATGACGAGATCGAGAAGCTCAAAATCCTCGCCGGAGGCCCCGAATTGT…
LOC108223148	TGAATTGCTAGCACCATATATGTCTGAAATATAGCTAGTTCATTAATTCAAAAAGCACGAAAATCACCAAAGCATTAATGAAAGAAACTAGTATCATTTTGGTGTGCTCATGTTTATTCTCAATCATGACGTTCTCTTCTGCAGCAGGGGACACCATAGCTGCAAAAGAAAGCATTAGTGATGGACAGACCATTGTTTCAGCACGCGGAGAGTTTGAAATGGGATTTTTCAGCCCCCAAGGCAATCCCCTCAATCGATATTTCGGAATTTGGTACAAGAAGATTTCACCTGGAACAGTTGTATGGGTGGCTAACAGAGAGGCTCCCATTTCTAATACTTCAGGAGTTGTCAGAGTCAGTAGCAGGGGAATTGTTGTAAGTACTAATCAAAGTACTCGCA…
LOC108223148	GCATCCACTTCCCCCATTCCGAATATCTGTATTTGAATACGCTGTACAATTGCAATCCTTCAAACACTTGTCCCTGCATTCTACAAGGCTCATGCTCATGTTATACTTTGACCATCGCGTGTCTGGCAATTTCACACCAGTATACTTAAAGAAACCATCTTCATTTCCACATTCCAGTTCAACATTGCGCGAACAACCACTAGTCCAATCTGCTTCCGCCCAGTGTTCTGGTCTTTTCGGATCAAACCCTTTTATACATTCACACCTCGGAGACT
LOC108210127	CACAAGCTACATATAAACAACTCCACTTCTTTGGGGGTTCTCTTTCTTTTCAAACCCATCACCGTCCACTGCTTAGGACTCGGGCAAGAAAATGGCGCGATTATCCAAGTTTCCCGCCAAAGCTGCCGCATTAAATTCCTTCTATCTCCTCACCGGCGCCGGTGCAGCCACCATTCTCACCGCCCATTTGCTAAACCCTAATTATCTCACAACTTCACCTGTCGTGACGCCCTCTGATCTGAAAGCTGTGCTGAACGGTGTCGTTCGCTCGTCTCGCGCCGTCCGCACTATTGCTTCGAGTGTGGTGGATTATAAGTATTCGTTACACGGCTTGTCTGTCGATTCGGATGAGTATAGTCGAGTATTATCTGAGGTTCATCTACGCTCAGCTAAGAGAGT…
LOC108204409	CTCAGCTCACCCTTACACTCCCTGTGCCTCTCCTCCCACCTTAATGGTATATATATAAACATGCACACACAATTACAAATACAGTATCCATCATCTTCACACCACACTAGAATTTTATATCAAACATTCAAACTCCAACTCTCCCCCATACATAACCTCTGCTCCCCCGCCCTCTCAAATATCAATTACCTCCATGGCTCAGTCCAAAGCCCTTCTGAAAGCACTTATTTTTCTCATCTCCATATGCTTCTCCTCAGCTAAATCAAACTATAATCCAAACACTCACAACCCATCTTCCTTACATAACAAATCTCTATCTCTCTCCTTCTCTCTATCATCTCTCCCTCTCTCTCCTCACTCTACTCTCAGAGCTTCACTCATCAAATCATCTTCCTCACA…
LOC108203162	AAGTTAGATTGGGTGCATTTTACTTAATCAGATAGTAGTGAACTTTAGAGTTGTGAAAACAGCAAAATCATGACACATCACTTTGAAGTTTATTTTATAAACAGGAAATGGAACTTTCCTTGGTAGGTCTTCAGAATGCAGGAAAGACATCTCTTGTTAATGCCATTGCTACAGGTGGTTACAGTGAAGACATGATTCCAACTGTTGGCTTTAACATGCGGAAAGTAACAAAAGGCAATGTAACTATCAAACTTTGGGATCTTGGAGGTCAACGGAGGTTTCGCACTATGTGGGAGCGTTATTGCCGGGGCGTTTCGTCGATTCTGTATGTAGTTGATGCAGCTGACAGAGATAGCGTTCCTATATCACGGGCAGAGCTGCATGAGCTCTTGAGTAAAC…
LOC108205190	AGATCACAGCCGTCTATCAGCTCACAAGAGCTGTTTTGTTTTTTCACTCATAAATCTCTTCTATTTGTGCAGCTGTTACTGTGCTTTTCAAAACTCACTCCCTCACTGCTTTCTTTGATTTCTTCGCTTAACTGTGTGTGTGTTTTAGTGTGTGAAGAAGCAAGCTCATCAATGGCTACTGAACCTGTCTCTAAGCCTCCTTCTCTCCCTCCTTACCCCGAGATGATAATGGGAGCAATTGATGCGCTGAAAGAGAAAGAAGGCTCCAACAAGTCATCAATAGGGAGACACATTGAATCCACATATGGTGATCTGCCAGCTGGACACCAGAACTCACTCACTGAACATCTCAACAAGCTCAAAGAAGATGGTGAACTTGTGCTTGTTAAGAATAACTAT…
LOC108203442	ACATTCGAACCCGGGGAAGCTCGAGCCCAGACTTATCCATAAGTTTCAAGCACAGGCAGGCATACAGCGTGTGCGTCTATATTCGCGCTCTGTCCTTGGCCATTACAACTACCAGTAACAACGCCATTGCCAATTCCAATGGCGTTGCCAAACCCCTCCCTTCTATCATCTTCCTCCCTCTACAGACTCAATCCTCTTCTCTTCTCTCAACGTCGTCGTAGCATCACACTCTCCTCACTCCATTTCACTTCCCTCAAACCAAGGCTTTTCACAGCTTCCGCTTCTTCGGAGAGCGATGTGTTTACTTCTCCGGAGGTCTCTAAATCGTTCGATTTCACTAATGAAGAACGAATATACAACTGGTGGGAATCTCAAGGTTATTTCAAGCCAAACTTTGAC…
LOC108194533	TATCGACTTATTCACACTACACACTACTAAGTGGAGGACGCTTCTTCTCTTAAAAAGTCAGAGATGGCAAAATCACCAGAAACAGAACACCCGGTCCAGGCTTTTGGCTATGCTGCCAGTGACACTTCCGGAACTCTTGCACCATTCAAGTTCTCCAGAAGAGCAACGGGGGATTATGATGTGAGGTTCAAAGTACTGTATTGTGGAGTGTGTCATTCAGATCTTCATATGGTGAAGAATGAATGGGGAATGACCACCTATCCTATTGTTCCTGGGCACGAAATTGTTGGTAAAGTAACTGAAGTGGGGAGCAGAGTAGAAAAATTTAAGGTTGGCGACATAGTTGGGGTAGGTTGTTTGGTTGGATCTTGCCGTTCATGTGAGATCTGCAATGATAAT…
LOC108205155	AAGTCAATCAACTCTCACACCGGGCACGCGTGATTTTGGACCTTACGCTCCCGAAACGTCGTCGTTCCAAGCTTCCCTACATAAGCAGAGGCAAAAAGAGGGGTTTTTCGTTAGATCAATTAGGGGTGTCCCTATACATTTCCCCCACACATTCTCCTCACTTTCAATCACAACACACACACACACAATTATACATACACATGCAACTACACTGAGAGCTGATCAACTCACACTTCATCATCAGGTTTGAAGCTGCTGTCTTATAATGGAAACTGAGAATCTGGCAGATGATGCTGGGAATAAGTTATTGCTTCCACCAACACCTGGAACTTTTAAAAACCGTGAAGAACTTATTACATATGTCCGTGAATTTGGTGCTAGCCAAGGATATGTGGTAAC…
LOC108205155	CTCACGGTTTTCCCAAATCTGCACTATTTGGAGCTTGAAAGTTGGTTCAGTTACTGCTATTTACTACCAGAGAGGTTTGAAGCTGCTGTCTTATAATGGAAACTGAGAATCTGGCAGATGATGCTGGGAATAAGTTATTGCTTCCACCAACACCTGGAACTTTTAAAAACCGTGAAGAACTTATTACATATGTCCGTGAATTTGGTGCTAGCCAAGGATATGTGGTAACTATCAAAAAGTCTAAGAGAGACAGAAGAGTTATACTTGGTTGTGATAGAGGAGGTGTTTATCGCAACAGGCATAAGGTTGAGGAGAAGAAGCGTAAACGAAAATCATCTTCTCGTCTTATTAATTGCCCTTTCGAAGCTATAGGCAAAAAAGATGATGATGAGTGGGTGC…
LOC108213080	TATAAATTTAAAACTCCCGCATCTCATTCTTGAACTAGAGTAATTTGGGAGAGAAGCAAAAGATGCAATTTGGTGGCATATCATCTTCTTCTCTTCATCTAAAACTCCCACTATTAGTTTGTGAGAGCAGACCACACAGTAGTTTTCAAAATTCCACTCATATTAATGGCGGCGGCGGAGGGGGTGAAGATGATAATTTGACATGTTGTTTGCCCAAGCATGTGAAGTTAATTACGAGCCCATCCAACCCATTTGTCAAACACTGCCTTAAGCTTCGACAGAACTCTTCTTATCGCCATCTTCATGCTTCTGTTCTTGTAGTTGGCTCTACTCCCATCAGGGAAATATGCTTGTTTCAAAAGTCATTGCAAGAGAGACCTACGGCCATTGATTGCGTAC…
LOC108204570	CGCAATCTATTCCAAAACAATTGTTCTCAATACTCCAGAAAATAATATCATCATAGGCACTATCGTCTCGGCCATTGCAACTTCCGCCGCGTCTCCGCCGTGTCGTCCAGGAGGTTGCAGGGGTTAGAGGTTGTCAGATATGTGCATTGCTTTTACATTGAAAGCGGTTCACAAGACAAATAAATAATTTGCTTTTGCATCAGTTACTTATTCAGTTTTATTAACATTACCACGGCATACGTTTTTGAGAATTTTATTGGAACTTAGTTTGTTTGATCATGGGCACTGGTTGCACTTTACAACTGTCCCCACAACTGGGAATGTATAGAAACCATCCATCCAGTAGAGAATTTCAGAGTTGGGCGGCAAGTGGCAGAGTAAAATTATTAGGTGCTGTAT…
LOC108204556	TTATCAAACACTTATCATATTTGCTTTCACTACTTCTCACTTTTGTCCTTTTTAATAATAACCCTTTTTCTCTTTCTCTTTTTCTTGACTAGATAGTGATTTTTAGTGGTCTCGCCGGAATTTTCGCCGCCGGCCGCCGGAAAATGGGTCACCGGAGAGGAGTGGGAGGAGGGGTTGTTGCTGGGCTGTTTGTGTTGCTTTTACCTGTTTTGTTCCCCACTCTTTTTGCTCCTTTTAGTCATGCTTCTCCTTCTATCTTCTCTGAATATAATACTCCAAGAACTAGACACTCGCGTCTGATCAAGAGTGCTGTACAGCGTCAAACTGTGAATAAACAGCAATCTGAGCTATGGAGTCCACTGCCTAACCAAGGATGGAAGCCCTGTATAGAATCAACCT…
LOC108204307	TCTGCTATTTTAAAACCAAAGTGTGTCCACTGTCGCACCACATCTACCAAATCCACACTCAAACACTATCCACGACGTCGTTTCATCGCATCCACAAAACATAACAAACGGTGCGCACAGCTCAAATACACACAGATAGATAATACGCGGAGCCAGAGAGTTGCTAACGACGTCGTTCCGGTTCAATTCCCGGTTAATCGGAAACGTGAAACGCAATGTCTGACCAGAAGAACCGGTGGAACTGGGATGTGGCCGGTTTTGAATCGAAAAGACCGGTGGCGGTGGAGTCTGGCGATCAGAAGTCGCCGCCGTTGGTGCGGAGATACTCCATAGCGTCGCCGTTAGCGCGTCCTCATTTCGATGTCGCCAAGCAGAGAGCGGTGGTTACCAAACTTAGTA…
LOC108195025	GGAGGGAGTATCTCGGTATTTTCATCCACAAATAAACGTCGAATATACATCAACCATCACGAAAACACTTAAATTAACCGGCCGGGATATTGCATGGCGGATATTGTTAAATTCTTAAATAAGTAGCTTTTTTTTGACAGAACTCTTAAATAAGTAGCTTGACAAAATATTTTCATACATGAAATACCGATGGGTAGTGCCCAGTAAATGATAAGAAAGTCATGCTCACAAGCACAACTCAAAAAAGCACTCGGCCTCCCAAACAAATTACAGGTAAAAGAGATCCAGGAGTGCCGAGTGCTGTACAGATCAGATACCGAACAACTATATACATACTTGAAGCAGTGCCGAGCCATGTGTATAGGCAATAATAGATTCAAAGTTATAAGGTGACAACTG…
LOC108196586	TAAAGATAAAAATTCTATCTTTTGGCTTTATTGATTTGATTTTGTCCTGCATTGTACATGGAACTTATTTCCTGCAAATGGGTATTCATTTTTGTGCTTTCTTGTTGCCTCATCTTTTCTGTAGCATACTCAGTGGAGGGATTGCGCGGAGATTCGAGAGTGAGGGCAGTTAACTTGGGTGGATGGTTGGTTGTAGAAGGCTGGATCAAACCTTCACTGTTTGATGGAATACCCAATGGAGATATGCTTGGGTTCAATTCAAATCGGTGACTTCACAAAAATATGTTTCTTCAGAGAATGGAGGCGGGATGAATATCAGTGTCGACAGAGATGTACCTTCTTTATGGGAAACCTTCACGTTATGGAGGATTTCTGAGACGAAGTTTCAGTTCCGTACTT…
LOC108204466	AAATTTCCACTCAAATCCCATATTTTCCACACACAAATCCAAGAATACTCAATACCCAAAATTTTACTACAACTATTTGTTTTATGTTGGATTTGATCTAAGCATCATATTATTACTCTATGTACTTGGAGCCATTCAACTCAAACACTTACACTTTGGTTGCATGTATCTTCATGTGCAAGTCTTAGGAGGACTTTTTCGAGAAATATTGATCAGACTGATGAGAATATTATGAATGAAGATCATGGCCCCGAGTTGATTCATCCGATATGGTTGATTAACACTGTTGGTTTGACCCAGATGGTTATTGATTCTATTGCGATTATTAAGTATAAGAAGGGTGAAGGGTTGGTTGAGGAGACTGATTGTTCGATTTGTTTGAGTGAATTTGGAGATAAT…
LOC108204384	TTTAAAGAGTGAGCGAGAGACAACTGAGAAGGCCAGCTGAGCTGTTTTAGTTTTAGTTTCTTATTACATATCTCCCTCACTTGTATTCTTTTCTAGTCCTAGATTAGTGTTGTAATAATTATGCATGCTTCTTCAAATTTGATTGAGTAATAATGATGTAGTGAGAGTTCTTGCAGAATCTTTTTTGTTTTGGTAAATTCTCTGCTGGGGGTTGTTTGGCTTGGGATTTGGTTTGATGGGTTCAGAGGGAGAAGTGGTGATGAAAAAGGAGAAAGATGGGAAACCCAAGAGAGGTTTGCACAGTCACTCAGATTGCACCAAACACTGTGCTAACACCTGGCCTCTTTTTTCTTGTTACCACATTTTTGCACACAATAAATAAATCCTTGAGTTTAAGCT…
LOC108204875	GTCGCAGAAGTGAAGGAGGACCTGCAAAGCAAACGTGGCTGATGGCGCACGTTAGCACACAACCTAACCGATTGCAGCAAGCACCGCACCGATCGCCCAAAATCTAGACACACACACACAATACACACACAATACTTTTGAAGCACCACTAGTCCACATTACACATTATTATACACCTCAACAAACTCAATTTCTCCAACACGAGAGTCGAGATGTGGGTGTTTTATCTGATCTCGCTGCCTCTAACGCTAGGCATGGTCATCTTAACTCTCCGATACTTCGCCGGTCCCGACGTCCCCAGATACGTCTATATCACCGTTGGATACACTTGGTTTTGCTCTATTTCTATCATTATTCTCGTCCCTGCCGACATTTGGACGACAATTCTTGGTCATGAAA…
LOC108204897	TTTATTCTATTCCCCTTTCCTCCCAAATCAGAGCAGGTAGAAATAATTTTGCCATCTTTGACATTCGCATACCCACCACTCCTCCAGCTCATTCCATCTCTCTCTCTCTCGTTCTCGTTCTCTCTCCCACACACACACGCAGCCTCACTCTCACAAACGAATATATATCTACCTCGTTAACGCCGCCACACTATAAAAACATAAAAATACAGCGCACACATCTCTACACACACTCCCAATTTCCCGGCGACATGACCGGAAAATCTCTCCGGTAACCAGACACTCAATCGCCATGTCAGACGACGTCGTAGCGAAGACATTCCGCGCGCTCGTCGAGAGCGCCGACCGGAAATTCGCGCGTGTCCGCGACGTGCCGGTGTACGGACGCGCACCAAACAA…
LOC108205414	ATATATTCTAGGGCTCGGGTTTTAGAGAGTAAAACTGAGAGCAGCGATGGACGAAGAGGAGCACGAAGTGTACGGTGGCGAAATTCCGGAGATGGAAGCTGACGTGGACCTTCATCATGCTGACGTCGACATGTCAACTGCTGTTGACGACGACGCCGTTAAGGATTTGGATGAGATGAAGAAGAGATTGAAGGAGATGGAAGAGGAAGCTGCTGCGCTTAGAGAGATGCAAGCTAAAGTCGAAAAAGAGATGGGAGCTGTTCAAGATCCTGCCAATGCAGCTGCTACCCAGGCAAGCAGGGAAGAGGTGGATTCACGCTCCATATACGTTGGGAACGGCATTCCATATCTCGAATATCACTGGAATTTTTACCCTGAATGTTGACAGCTGATGGATGA…
LOC108205234	CATCATCATTATACTTGCAATATATACACACACAATAATAAGGTATGAATGTAGAAGCGTCAAGAAAAGAAAGAAACCCCTTATAAATCTATTGCTTTTGGATCCTAAAAATCACTTTTTTGAACGATTTCTTCATTGCCCATCTCGAGATTTCTCATTTTCCAGCTGGGTTTTTATTGGTTTCATCATTTTTTTTCCGTTTTCAAGGTGATTTTTTTCTTTATATACAGATCATTGCTTAAACCTGTTTTTCTTGAGTGGTTTTCAAGAAATCTTTGAATTTACTGATTCATAATTGTGTTATTCCTGCGACATGCTAATTGACTAATTTTGGGGCGATTAAGTGGTGAATTGGATTGATGTGCAATGCAAAGGTCACGGAAAGCTCTTCTGGAAAGA…
LOC108205234	CATCATCATTATACTTGCAATATATACACACACAATAATAAGGTATGAATGTAGAAGCGTCAAGAAAAGAAAGAAACCCCTTATAAATCTATTGCTTTTGGATCCTAAAAATCACTTTTTTGAACGATTTCTTCATTGCCCATCTCGAGATTTCTCATTTTCCAGCTGGGTTTTTATTGGTTTCATCATTTTTTTTCCGTTTTCAAGGTTATTCCTGCGACATGCTAATTGACTAATTTTGGGGCGATTAAGTGGTGAATTGGATTGATGTGCAATGCAAAGGTCACGGAAAGCTCTTCTGGAAAGAAGAGCTTTAAAGCAGTCCTTCTATGGAAGGAAACAATTCTATAAAGTTTCTCTTTCTCTGGCTGTTGTTCTATGGGTGTTTCTCTTCCTTTT…
LOC108205234	CATCATCATTATACTTGCAATATATACACACACAATAATAAGGTATGAATGTAGAAGCGTCAAGAAAAGAAAGAAACCCCTTATAAATCTATTGCTTTTGGATCCTAAAAATCACTTTTTTGAACGATTTCTTCATTGCCCATCTCGAGATTTCTCATTTTCCAGCTGGGTTTTTATTGGTTTCATCATTTTTTTTCCGTTTTCAAGTTTATTTATGTGCTGTGAAGTTGTGGATCAATATTTTAGAGTGTTCAATTTCAAGAATTGAGGTTATTCCTGCGACATGCTAATTGACTAATTTTGGGGCGATTAAGTGGTGAATTGGATTGATGTGCAATGCAAAGGTCACGGAAAGCTCTTCTGGAAAGAAGAGCTTTAAAGCAGTCCTTCTATGGAAGG…
LOC108201370	GAAAGAAGCGAGAAGGAAAAAAACCAACGCGAGAAAACAGAGAGAGAGAGATACAATCAACCCCTCCTCCCTGTCTCTTCAATCAAATTTCTAGAGAGAGAAAATCCAACCACTTAATAAACTCTTCTAGAGAGAGAAAATTATATTCTAATTGCGGCAGCGAGGAAGGTGAATTCCGATCAACCTCATCTTCCTCCACCACAATTAACCACCGCATCGCCACCGCGATGTCTCTTAACATGAAAACCCTAAGTCAAGCCTTTGCCAAGACCGCCGCGGCGATCGAGAAGACCGTACAGACCACCGTGCAAGACGTCACCGGTCCCAAGGCTCTCCACGACTACGATCTCCTGGACCAGATCGGTTCGGCCGGTCCAGGTCTGGCCTGGAAGCTTTATT…
LOC108201740	TCATCTTCAAGTGCATGTGAACCACAATTCTCCTCTTTGTTTTTTTGCTTGACTCTCAAAAAAGAGATAATTGCTGTAGAATCCAGTGATCCAGTAGGAAAGGCCCGACCTTCCTGTGCAAAATATGAGGCTTAACTTTGGCTAAAAAGACCCATACATACTTAATCTCTTTCTGTGTTCCTCCAGTTATACAGACAGCTGCATATTTTGTACATATTGAGAGAGAGAAATGAGTAAGATGGGTTTGTTACATGGGACTTCAACGGCATTAATCTGCAGTTGCTTCTCCTTAAAACCACCTCTTCTTTTCAGCTCAACTTCTGCGCTTACAATTTATCTATTGTCCAGAATATCAGCGTACTAAATTCTCAGAGATTGTCGTTGTCATTTGTGAAAGAC…
LOC108209230	AATCTCCGTAAATTAGTTGAAAGCGGGTAGAAGTTAATTGCTTACTCAGTTTAATAAAATAGTTGGCAGCTTAAAATTTATCCGCGTGTCTCCACACTTCTCTTCCTTCAGCCACGTATACACCCCTGTGAACCCTTTTCCTTTTATTCCCTGTGAAACCTCATCTCTCTCGTTAAATCACAGTAATCGGTTCTCTCGCAAATATCTCCCCAATCTCACGCCATTCCTTCGGTCTCTCGCTACCATCTCCCTATACACTTCCCTCCATCTCTCGCCTTTGTACGTACGGTCGCCATATTCCATCGGGATTCTCTGCCGCCGCTTCCTTTTCCGGCCAGAACCAACACCGCCTATTTCTTCCTCTTCCGGCGACCACCATAGCCCTGCACCAGTTATAAA…
LOC108204720	TCAAAAAAAAACATCTCTCTTTCTCTAATCTCTACCCGTTACAATTCTTCAGGCGAAGTCCCAAATTTGTAAAACATGACACTCTAAACCCTAACGACTATGAGGGTCTCGTAGCAGAGAAACATATAATCCTTTCCTTTTGTTTGGTATGCTAATCATATTCATGTCATGGGATTCGTTTTTCATCCTGGAAATCATAATTACATCCGGCTGGTTTTGTAGCCAAAGGCTGCTCTATAGGCTTTTAGGTGCTGGATTCTTGGTGGAGGCTTTAAAGGATGGGGTTAGAGACCGTCACCAAGTTTGGGATGAGGATGGATAGCCGTCGTGTATGTACGGTTACCAGACTAGCTTGATTGTAGATTTGTAGTGATATGTTCGATCAGCGGCACATTGACA…
LOC108205043	TGCAAATGGAGAAAGCCTTCCCCACATCCGGCAAATATTTAGTACTGCACAGAAGTTGGACAAACTTGGGATGCGAGGCAGTGACACATGCGAGCTTGTGTTCGAGAATTGTTTTGTCCCTAGAGAAAATATTCTTGGGCAGGAAGGAAAAGGAGTTTATGTTATGATGTCTGGGCTGGATTTGGAGAGGCTTGTTCTGGCTGCTGGACCAGTGGGCCTCATGCAGGCATGCCTTGATATTGTTATTCCGTATGTTCGGCAGAGAGAACAGTTTGGCAGCCCGATTGGACAGTTCCAGTTTATACAGGGGAAAGTTGCTGACATGTATACTTCCTTACAATCTTCAAGATCGTATGTTTACTCAGTCGCAAGGGACTGTGACAATGGAAGAGCGGATCC…
LOC108205043	TCAAGGCTACAAATTACAATACAGTAATAATACAGCACACAATAGTATACAAACCGCAAGGCTTAAATTCCGAAATTTCCAGCTCAAAACATCCATCATCGACATCTCCTGACAAGATAAAATCAAATGATTCATTATCTTGTTCCCAAAATAAAGATGCAGAGATTATTGGGAGCCGGAAAATCTGTAGCAGCAGCAGCTGCGGGAGCTTTTACGAGGAAGCACCGTGCTCTCTCTTCATCTTCTATGCTCTTCGATGATACTCAGATTCAGTTTAAGGAAAGCGTTGCACAGTTTGCTCAAGAAAATATAGCACCTCATGCATCAAAAATTGATAAAGCAAATTCTTTTCCGAAGGAGACCTGATTTCAACACCTTATGTCTTATGGGACTCTTTGT…
LOC108204789	TTTGTAGCCTCTCTGTTACAATAGTATTAACGAATTAGCATAAGTGCCAAGCTGGATAGGCTTGGTCCTGGGTTCGGCATACACAGCCAATGTAAGTTGTAAGGCGTTAGTGTAAGTACATTATATAAGGAAAGAGAACTTCTGAAGAAATCAAACTACATACTTTGTACTTGTCTGTGAAAAAGTCTACAACTATCTTATATTTCATGTACTGATACGAAAACCAGCCACAACGTAATATTTCTCATTTCTGAGTATTTTAAGGAAATAATCACAATTTGTAACACAGGCAAAAAAGTATTACGTAAAGCAGTATTTATTCCTAAATTTCACCTTCAGGCAACCTTGCACAAGGAGATTCTTTACATGGCTGGGCAATTGGGGCTTGACCCACCTACA…
LOC108212499	TTATTAAGATAAAAAACCAATCAAAATATTTTAAACTTATATAATTTCGCGTTTAGTGTGTGCTCATAGCACACACTAGAAAAACCCATATAATTATCACGGCAGTTATATGTCTCTGGGCTCTGGCTCTGTGTGATGAACGCAGAACTGAAAAGGCACCAGCATCAAACTCATAAAATGGAGAAAAAGCCATATTTAAAAGTGCTCAGTGTCTGCAACATACAGCTTCTTGTCGTAGTTACTGCAATACTACAAAACCTTGTGCAGCAAGCAAGTGCAGACTTCCATTCACCACTCATCAAGTATCTCCCCGGTTTTCAAGGACCGCTCCCTTTTCGGTTCACAACTGGGTACGTTGGCGTGGATGAATCAGATGATGTGCAGTTGTTTTATTATTTT…
LOC108212499	TTATTAAGATAAAAAACCAATCAAAATATTTTAAACTTATATAATTTCGCGTTTAGTGTGTGCTCATAGCACACACTAGAAAAACCCATATAATTATCACGGCAGTTATATGTCTCTGGGCTCTGGCTCTGTGTGATGAACGCAGAACTGAAAAGGCACCAGCATCAAACTCATAAAATGGAGAAAAAGCCATATTTAAAAGTGCTCAGTGTCTGCAACATACAGCTTCTTGTCGTAGTTACTGCAATACTACAAAACCTTGTGCAGCAAGCAAGTGCAGACTTCCATTCACCACTCATCAAGTATCTCCCCGGTTTTCAAGGACCGCTCCCTTTTCGGTTCACAACTGGGTACGTTGGCGTGGATGAATCAGATGATGTGCAGTTGTTTTATTATTTT…
LOC108205423	CTGTAACCAAGAATCCTGCTAAACAAACAAGGCCTAACGAGAACCGCGCAGCAAGTGTTATCCCATTTCGGAAGAAATAGGCTGCTCCCTCTGTTGCCACCCTCTGTTTTGGACTGCAAGTGTTATGCCACCCTCTGTTGGACTGCTCCCTCTGTTTTCTTTCTTCCTTTTATAAAATTTTAATTTAGCAAAAAAAAAAAGTGTTATCCCAAAGGCGGGAAAAACCAAAAAGGGAAAAATAAAGAAGAAAATACTATTCCCCCAAACAATTTTGCTCCAGTTTTATTGCGTATATCTGTGGATCTCTCGCTCTCTACTTGCAGAAACCTAGGGTTTCAAGTTAACAATGGCGGAGAACAACGACACCGCGACGAAATCGATCATCGCCGACGTCGCCGA…
LOC108208406	TAGACACTAACAAGTATCGCGTAGCGAATGGAGCGGGTAGAGGTCTTGCAACTCAATAACACAGAATCTGAAGCTAATAGCAAGGAGGAGCAGACAGTGAGCTGTTGTAATGGCTCCACGAGGGAGAGCAAGTCATGCCAACAAGGAGAACAAAGCAGGGGTGTTTTTCTTGGCTACTTTGGTGATGTGGGGTGTCTCTGTTTTGTTTGAAATAGTTGTTAACAAGAGGACTGAGCTCTATTCTGTTGTTGCTGGCTACTGTTTCTACCAGTTTTCCAACTGGGTTTTCAATACTTGGGTGTCTAGAGATCATCTGTTTGTCAATACTTGTGTTTCTCTCCTCCATTCATTCATTACTTCTTGTTCAGTGATTTTCATATTAGTTAATCAGTGGATAGG…
LOC108205481	CCAATCACACATAATAACTCGCCGTCTTCTCGTCCTTTCGATCACAGTTGTTAAATTTTACCTTAATAATTGGCACCCTGTACAAGGGTCCAAATCATCCACAAATCAACTACTACCGGGTAATGAATCAGATAAACAAAAGTTGCAGGTTTCTGCAATTGGATGTCCTAAACAAGTTTAATCTATGGTCTTATTGTATCAGTTACACACAAACCTGTGTTATTGAGTTGCAAGACCTCTACCCGCTCCATTCGCTACGCGATACTTAACATAGCATTGTGGAAGAACGATTGAGCAGCCTTTAGGATTTATGTTTTTATGCATGCGTGGCGTAAGAATCGATATGAGGATGCAATGCCTGGATACAAAATTCTTTACCTCTTCAACTTCTCTGGCGCC…
LOC108205481	CCAATCACACATAATAACTCGCCGTCTTCTCGTCCTTTCGATCACAGTTGTTAAATTTTACCTTAATAATTGGCACCCTGTACAAGGGTCCAAATCATCCACAAATCAACTACTACCGGGTAATGAATCAGATAAACAAAAGTTGCAGGTTTCTGCAATTGGATGTCCTAAACAAGTTTAATCTATGGTCTTATTGTATCAGTTACACACAAACCTGTGTTATTGAGTTGCAAGACCTCTACCCGCTCCATTCGCTACGCGATACTTAACATAGCATTGTGGAAGAACGATTGAGCAGCCTTTAGGATTTATGTTTTTATGCATGCGTGGCGTAAGAATCGATATGAGGATGCAATGCCTGGATACAAAATTCTTTACCTCTTCAACTTCTCTGGCGCC…
LOC108205481	CCAATCACACATAATAACTCGCCGTCTTCTCGTCCTTTCGATCACAGTTGTTAAATTTTACCTTAATAATTGGCACCCTGTACAAGGGTCCAAATCATCCACAAATCAACTACTACCGGGTAATGAATCAGATAAACAAAAGTTGCAGGTTTCTGCAATTGGATGTCCTAAACAAGTTTAATCTATGGTCTTATTGTATCAGTTACACACAAACCTGTGTTATTGAGTTGCAAGACCTCTACCCGCTCCATTCGCTACGCGATACTTGTTAGTGTCTATTCTTTCTTTATTGTCATGAACATAGCATTGTGGAAGAACGATTGAGCAGCCTTTAGGATTTATGTTTTTATGCATGCGTGGCGTAAGAATCGATATGAGGATGCAATGCCTGGATACAAA…
LOC108205481	CCAATCACACATAATAACTCGCCGTCTTCTCGTCCTTTCGATCACAGTTGTTAAATTTTACCTTAATAATTGGCACCCTGTACAAGGGTCCAAATCATCCACAAATCAACTACTACCGGGTAATGAATCAGATAAACAAAAGTTGCAGGTTTCTGCAATTGGATGTCCTAAACAAGTTTAATCTATGGTCTTATTGTATCAGTTACACACAAACCTGTGTTATTGAGTTGCAAGACCTCTACCCGCTCCATTCGCTACGCGATACTTAACATAGCATTGTGGAAGAACGATTGAGCAGCCTTTAGGATTTATGTTTTTATGCATGCGTGGCGTAAGAATCGATATGAGGATGCAATGCCTGGATACAAAATTCTTTACCTCTTCAACTTCTCTGGCGCC…
LOC108205481	GTGAGGCAGACGAGCTTATGCTTCTGTTCTGAGAAATTTAAACAAGAGGCATATGTTAAAGCATTAGGAAGGGGATTTTCTGGATCACCATTCCAAACTCTTACCATCCGGTCTGTAGCTGATAGCAAAGAAAGCTTTCATCTTTCTGAAAGTTCCAGTTTTGAGAATTCTGACATAGTGGTCGAGTCTTTAGAGGATTCTGCCAACCTCACAGGCGATTGGCAATTTGCACTCTTGGAATTGGTTGGGTCTCATTATGCTGCCATTTGCTTAAGAAAGGACTGTGCCAATAAATATAAAAGCCATCCTATGAAAATGAGTGTGTGGAGGACAATTCCACTTGTTGAAGATGAATATGTTTCCGGGACTGATTCTGTCATAGCTGTTGGGGGGCTAATG…
LOC108205530	AAAATACTTTGGATCCGACCCGGAGTACTCTCCAAGCCACTGCTTTTATTCCAAAAACATAAACTCGCACAACCCTTCGCTTCTGTGCAATTCAACACACTCAGAATCATCTTCATCACACACACAATCACAAGCAGCAATGTCGATTTTCGAGTACAATGGAAGTGCTTTAGTGGCTATGGTTGGCAAGAACTGCTTCGCGATTGCTAGCGATCGGCGTCTCGGTGTGCAGTTGCAGACTATCGCTACTGATTTTCAGAGGATTTTTAAGATTCATGATAAGCTGTTTCTCGGCCTCTCCGGCCTCGGTTCCGATACACAGACTTTACATCAACGGCTTGTATTTCGTCACAAGTTGTATCAACTTCGAGAGGAGAGAGATATGAAGCCTGAAACTTT…
LOC108204857	CTATTCTCCGCCCCTGTCAATTTTCAGTCTCTTCTTCCACAAGAAAACGCGTCTCCTGCATATCAGTAAACCCTTCTCCTCTCTCGCTTCATTCCAACCACATACATATACAATCTCTACTTAAACTATTGTGTGTGTGATTACACACACTTACTTGACCTTCCGAATACTTTTTATGTTGATAATAATATTTGGTAGCACAGCTAGAGCATGAGCTTCTTGAGACCATCAGCACTGTACCAGCTGTTGATCACCTTTAATTCATTGAAATGGATGCCTTGTATGTTCTTCGGATATCCAAATTTTCAAGGGATCATTAGGCTTGTGATCATGTTTCTTCTCTGGTCAACGTTCACTGAAATGTGTCACATTTCTTCTTCCTCCATGTCTCCTACTCTT…
LOC108204856	GTGTTCTTGTCTGCTATGAAGATCTAAACGACTCATGGCCAAGAGGCAATGGCCTCTCGGGCAATTCTGGGATATCGATATCACTTTCTAACATCTTTAAAGCATCAGCAATTGTAGGCCTGAGAGTCACCATTACATGAGCACAAAGTAGGCCAACATGAACAAATCTTTCCATCACTATCTTTGGTCCGTCGTCTCTCACAATGGGATCAAATATTTCACCAACATTTCTGGACTTAACATGATGCCAAGCCCAATCAATGATCAAAACAGTAGAAGAATCTGATGTGCCCAACACTTTCCTTCCACTCAGAATCTCAAGAATTATAATGCCGAAGCTGTAAACATCACTCTTCTCTGTTAGCTGTCCATAGAGCGCGTATTCTGGTGCCAAATATC…
LOC108204859	CGTTTCTTCTGAACCGATGACTCCTGTATATACAACGCAATTACCAATTGTACCACATCAGTTACATAGACTTAAATAACAGTACATCTATCTGTCATCGACTTCAAATTAGGGATTTTTCAAGCTTGCAAACACACACACGCACAATAAATTCTGGCGCAAAAGAAGCCAATTAGCTGATCAATTGTCTATTTTCAGCTTCTTCAGTCGATTTAAATGTGCTTGATACTCTGCCACATTGTTGACAAATAATTGAGTAGACAAATGGTTGATGTTGTAGATGAAGTGTGTGGTAGGGATGGAGAAATTGTTCATTATCCTAGGACTGATAGTCTAGGGATCGAAGGTGATGCTGATCTTGAGCCACGTGATGGCATTGAATTTGAATCGCATGAGGCA…
LOC108201786	TCCGAAAGCGCATAGAAAGACATAGGAATTCCCAATTGAAGAAAGTCAGCATAGGCAACCTGACAAAACTCAAATAACCTCCCATCACCCCAAACCATACATACATACATCATAAACAAAACCACCTATACATACATATACATACACCTATACATACAGATAATTCAAGCTCAACCGCCATGGAATTCAATCAATTCGATCACAACAGGTACGTTTCTCATCCTCCTCATCACCACCGCGACGCTCACCGTCACCACCTCCCGCCGCCGCCGCCGTTTCATTTGCCTCCTCCGCCGCCGCCGTTGTATCCTTCTCTGCCGCCGCCTCCGCCGCCTCCACCGCCTCCGCGTCATTCGGATTTCACTTTTGTGAACTCGTCGCCTAGGGTTTCGTCGGGTC…
LOC108201786	TCCGAAAGCGCATAGAAAGACATAGGAATTCCCAATTGAAGAAAGTCAGCATAGGCAACCTGACAAAACTCAAATAACCTCCCATCACCCCAAACCATACATACATACATCATAAACAAAACCACCTATACATACATATACATACACCTATACATACAGATAATTCAAGCTCAACCGCCATGGAATTCAATCAATTCGATCACAACAGGTACGTTTCTCATCCTCCTCATCACCACCGCGACGCTCACCGTCACCACCTCCCGCCGCCGCCGCCGTTTCATTTGCCTCCTCCGCCGCCGCCGTTGTATCCTTCTCTGCCGCCGCCTCCGCCGCCTCCACCGCCTCCGCGTCATTCGGATTTCACTTTTGTGAACTCGTCGCCTAGGGTTTCGTCGGGTC…
LOC108223363	CCCGGATTATGTTTCATAAACTCGTTTTTCATGTTAATGAAATTCAAGGCCTCCAGGTGAAAAAAGGATTGCACAGATATTTCTTGCTAAGACTGGATACGGTATAGTGTGCATGATTTCTACTCCAGATTCTCATCAGATCTAATGGTCAATCAGTATTTTTCCAGATGCAGTTTTGGGGATTGAACTAACGAACCATACCCGCCTAATTTTCTTGTATGGTGCAACCTACAATTCAGAAGGTAACTGTATAAATGTACAAGCCCGAGATATCATTAGTACATACAGAGGGTGCAAAAC
LOC108223363	AACAGTTCTTTAATTTGTTTCAGGGGGAATGTTAGGGAGCTCTCGTTGTGTTCCGTCAGTTCAGGAACTTGTCAAGGACAGAAAGTCTACCATTCCAGCTTGATATGTATTCGAAAACCTGTAGTTTCCAGTTTAATAAAATCACTTCAAGTCGCTGGTATTGTTATGAAGATGTTACTTGACGCCCACTTCAAGTCCCTGTTATTGAGTCCGCGTCAAGTAACGTGTTCATATCTAGAACAGGGACTCGAAGTGATTTTACTGAACTGGAAACTACAGGTTCGAGATCTTTATGTACATATCGAGCTGGGATGGCAGACTTACTGTCCTTGACGAGTTCCTGGACTGACAGAACATAACGAGAGCTCCCTAGCATTTTCCGCTCTTCTTGGAAACAAA…
LOC108209844	TACTGCTACGAGGCAAAAAATTTTTGGCAAAAGGCTTTATGTTCACACATTTACACAAATATTGCAAACCATCCCCAAGTCCATACCAGATACTGCTTAAACTCCTTGCTCTGACTTTCTAGTCAATAAAAATCCCACCTATTTCAAATAACCTGGAAACTTTCTTAGGCCTGACTTGTGAGGAAGGGTTTCGAATTGCATTATATAATTATGATATTCATTCGGGGTTTCTAATGCATACTGATATGCCTCGAATTAATTTTCTGGATACTAGTATATGCATGTGAGTCTGTCCAACATCGATGATCGGATGCAAGGAAATGATAACATGGTACAGAATCTCATAATGTCAAGCACAACAATTACCTTGATCTTTTTGCTTCTCAATATTTCCTGGTT…
LOC108204313	GAATAATAATGGAGGGGACAGCGATAGGAATGTGTATGTTATAGTATGTACAAGTAATAAACACCACAAGAAGGAGAAGAAAAGAGAAGAGATCTGTGGTGAACTTTGTACATTATATCCCAAGAGATGAACGTAGAGGAAGAGATTGATCGACTCAGAGAAGAAATTCAGCGTCTGGGCAAAATCCAAGCTGATGGTTCTTACAAGGTGCGCAAATATTTTTGAAGCACTAGTCGGGACCCTACGGGCTGCCAAAAGACGCAAAGTTTTGACATATGATGGTGAATTACTATTGCAAGGTGTTCATGATAATGTTGAAATTATTCTTAAACCCACTACAACAGTTGCAGCAGCTTAAGGTCGCAAAATGATGGAAGTGTTATAAACTGTAATTCTTGT…
LOC108200593	TGAGAAACGGATTATTCGAGAAGAAAAGAAGCCCAATTTCATCTCACAAGTTACAGCTCTCTCTAGTCTGTAGTAAAGTGTAGTCGGAGTGTTACTAAATTGTTTGTATCGCATCTGTATGTATGTATGTACCTAATTATTTATTTAGTTGATTCGATGTACCGGGGATTCAACTAGGGTTTTTGGGTATGAGCACCGCCGTTCAATCGCACCGTTTCTGTGCTCCGGCCGCCGCTACCGCCGCCGGAAACCAAGATGCACTTAACAGAGTATTGGCTGATCTCTGCACCAGAGGCACTCCTAAAGACGGTGCTACGTTGGCTTTAAGAAAACATGTGGAGGAAGAATCTCGTGATCTTAGTGGGGAGGCTTTCTTCCGTTTTATGGATCAGTTGTACG…
LOC108204677	AGTAAGATACTAAAAACTCTCATCGTCGCCCAAATTAATTGCAAGTAATTTAAAAGTTCTGAGAAATCTGATGGGCGAACACTGAAAACAAGTAAACAGACAGACAGGACAGATTGGTGTTTGGACTTTGGAGGAGAAGAAGAAGAAGCTTGATATACTATTATTTTGCACTCGCCATGGATGATGATTTAAATAATGATGCCTTGCTTGCTCGAGTCCAGCAATTGGAGAACGTGGACCTGGCTATCTTGCTGTTGCGAAGCGGATGCATTTTCAGAGGACTACTGCCTTGGAGCAGGATATTGAGAACTTAAGAAAGACGTTAGCTTCTTGCATGAGAGAGAATACAAATCTTCAAGAAGAGCTTTCAGAGGCTTATCAAATCAAAAGCCAGCTGGC…
LOC108200689	CTGGAGGATAATGGTTTGAGGGCTGGGAAGGTGGTGGATACCCAGCAGGTGGTTGATATGGTGTAGGAGGATACCCAGCAGGTGGCGGATATGGTTGAGGAGGGTAGGCGGCTGAATGAGGAGGATATGGAGTAGAGGGATAAGGATATCCTGACGCTGGAGGTGGATATGGAGCTGCTGAGGCTGGTGGGGGGTAATGAGCTGATGAGGCTGGTGGGGGGTAATGAGCTGACGAGGCTGGCTGAGCGTATGTGTGTGCCGGTGGTACAGGTGATGCTGAATATGGTGCTGAAGCAGCATGATTCTTTGGAGGCTTCTT
LOC108200689	CTGGAGGATAATGGTTTGAGGGCTGGGAAGGTGGTGGATACCCAGCAGGTGGTTGATATGGTGTAGGAGGATACCCAGCAGGTGGCGGATATGGTTGAGGAGGGTAGGCGGCTGAATGAGGAGGATATGGAGTAGAGGGATAAGGATATCCTGACGCTGGAGGTGGATATGGAGCTGCTGAGGCTGGTGGGGGGTAATGAGCTGATGAGGCTGGTGGGGGGTAATGAGCTGATGAGGCTGGTGGGGGGTAATGAGCTGACGAGGCTGGCTGAGCGTATGTGTGTGCCGGTGGTACAGGTGATGCTGAATATGGTGCTGAAGCAGCATGATTCTTTGGAGGCTTCTT
LOC108200689	CTGGAGGATAATGGTTTGAGGGCTGGGAAGGTGGTGGATACCCAGCAGGTGGTTGATATGGTGTAGGAGGATACCCAGCAGGTGGCGGATATGGTTGAGGAGGGTAGGCGGCTGAATGAGGAGGATATGGAGTAGAGGGATAAGGATATCCTGACGCTGGAGGTGGATATGGAGCTGCTGAGGCTGGTGGGGGGTAATGAGCTGACGAGGCTGGCTGAGCGTATGTGTGTGCCGGTGGTACAGGTGATGCTGAATATGGTGCTGAAGCAGCATGATTCTTTGGAGGCTTCTT
LOC108206478	ATCCACTTTCAAGGTCAAAGTACTTATACGACGTCGTAATCCATTTGAACCCTCGTCTAGATCCGGAGCCTAGTCGTACTAGAAGAACACTCAGCGACGAAACATGAAAGCAACTCCTGTGAAAGTCTAATAGGATTTGTGTATGTATCATGTTGTTAAAGCTTCAGAGTAGAACACTATAGAGCGTGCATCTCTCTCTCTCTCTCGGACTCAGACTCAGAGTCTCTCTCGGTATATATTGAATAATATAAACACAAAGTGATATACTTACTATACATATATGTACGTGTATCCGTGAAAGGATGAGTAAAGCGAGGAGGAAAAGGGTAAAGTGGATTTGAAGCTTTCTTTCTTGTTTTATTTTTACCTAAATAAATTAATGGCTGACGATCTCTGTTT…
LOC108197181	ACGCAATCCAAACCCCTCACATAAATACACACAACTCCTCTTTCGTCAGCCCTTTTCTTTCTTTTCCCATCTCTCTCTAAAAACACGCGCACACAGCAACACCCAGAGAGATAGAGAGAGAGAGGGAGAGAGAGAATTAAATCCATCAAATCAAAGATTTCACCGCCGGAGAGATGCAACCACCGAGCAACGGAGGAGACATGAGTCAGCAACAACAGCAATGGTTGGCTATGCAGCAGCAGTATCAGCAGCAGTGGTTAGCCATGCAACAGTATCCCCCGGCGGCGGCGGCGGCGCTGCAGCAGCAGCAGATGGCGGCGGCGGCTATGTTCCATCAGCCGCCGCACTACTTGCCTTACCATTACTATCAGCATCAGCAGGCTCAGGTGGCGGTGGCGC…
LOC108197147	CTTCACAAAATTTTGGATTTTATGACATGGCCCATTGCGAATCTTGGGAAGTGGGACTGTGGGTCAATAATGAAAGTCATCTAATTATATGATAGACTTTGAAACTTAAACAGGAGGTAGTTATCACTTTGAGGAAAGCTCAATAATAAAAATGGCAAGTCTACAAGAAAAAATTACAGCTCCTTATGGTTCATGGGAATCACCCATCACTGCTGATTTAGTTTCAGCTTCTGGCAAAACCTTGGAGGGTTTCACTCTTGACTCTTCTTCCAATCTTCTTTGGCTCGAATCTCGACCTTCTGAATCCGGGCGATTAGTAATTGTTAGAGAAGCAGATAAGGTAGGGGAACAAGCTACTGATCTTACACCAGAGGGTTTCTCTGTACGTTCTACTGTCCA…
LOC108197147	CTTCACAAAATTTTGGATTTTATGACATGGCCCATTGCGAATCTTGGGAAGTGGGACTGTGGGTCAATAATGAAAGTCATCTAATTATATGATAGACTTTGAAACTTAAACAGGAGGTAGTTATCACTTTGAGGAAAGCTCAATAATAAAAATGGCAAGTCTACAAGAAAAAATTACAGCTCCTTATGGTTCATGGGAATCACCCATCACTGCTGATTTAGTTTCAGCTTCTGGCAAAACCTTGGAGGGTTTCACTCTTGACTCTTCTTCCAATCTTCTTTGGCTCGAATCTCGACCTTCTGAATCCGGGCGATTAGTAATTGTTAGAGAAGCAGATAAGGTAGGGGAACAAGCTACTGATCTTACACCAGAGGGTTTCTCTGTACGTTCTACTGTCCA…
LOC108204532	TTTATCTTTGTTTCCTTCTTTCTGTCCCACGTTGTTTCCTTCCCTGTCCTCTTGCAAGAAAAATAAGCCCCAGCTTCTGCAACATCAATCTTCAGATTCAATTCTTTACCGTTGCCTACACAAACTGTTGATTATATATATAGAATCTATATAAAATCTGGGAATTCATAAAGAGTTTGATTTTGAGATAACAAGCAATTAATATATTTATATATTAAATATATTGATTGTGGGGATTGAAAAGATGAAGGCCATGAAAACTATCGAAGATCTCATCGAAGAAGCGAAGATTCGAACTGTTTGGTGGGCCCTTTGTATATTCTCTGTCTCGTACTTCTTAACACATACAAGTAAATCAATGTGGATGAATGTTCCTATATCTATTCTCATAGTTTGTGG…
LOC108192816	CAGAAGAAACACAAAATAGGAAATAGGTCACAGAATGAGTAGAATGAGGTAAAAACGATAGAAGAATAAATTAAATAAAAATCGGAGAGGCGGAGAGATGCTGATTAAATTTTCCATCCTCCAATTCGAAGAAGCAGCAGCAACATAATCAAGATTGATTCGAAAACAAGTCGAGCAGTAGCAGTAGTGGTAGTAGAGTAGTAGTAGAAATTTGTGTGTGTATATGATGCAAAGTCTTCAGCATCAACAACAACAACTAGCCGCTCTCGTCTCTGCTGCCTTGCCCAAAGACACCGCCACCGCCAACTCCGCTGCTTCTTCTTCAGCCTCTGCATCTTTGACAACAACTCAATCACAATCACAATCAGAGTCGGAACAAGACGACGTCAATTCTCGCAT…
LOC108201908	AGAGAAATGAAAAAAGAAAATGAAGGAGACAGTAAAGGCACATTGCTTTCTTGTTTCAAGGCATAAATTTTGGATGGGTGTCCAAACCAAAACTCACAAAGAAATGGGCAACGGCAAACGAACAACACCGACGTAAATACGACATTTGGAGCGTGATTTTCATTGTTACATTGTTAATGTTGACCAAGCTAGCTGAATTTTGAGAAGAGTGTTTAATTGATTGGTTCTGGATCATTGTTCGTATCGTTATGGAGGCTTTGATCGAGCTCTGTGACTTGATTTCTCACAATCCTGTTAAATTTGCGGACAAGCTTGCTTGGATTTGTGGCCGATGTCCTCCGCCTGATGCTTTTCGAGGTCAATCGCCTAGGGTTACACGGTCGCAGCTCAATGCTGTGC…
LOC108204845	CATTTCAAAAATCCCGCGGTAAATTAAGCAGTTTTTACTCGAGGTAAAATTCAACAAGAAACACAAATGTTGACTAAAATTCAAATACAGCCGGAAAATACACACACTAGCATCTTCTTGAGTCCATGTGATTAGCTCACATTATATACAGAAATTTAATGGCAGCTTCTTCTTCATCATCAAGAGGACGAAGCAGCTCGCCGTTTACCCACCGCAAGCCGTCGTCGCCGTCGCCGTCTACTTCCTCCTCCTTCATTAACGGAAAGCTGATGCCGCGCTCATCTTCTTCATCAACGACGTCGTTTTATAACTCCGATAATGCTTCCAGATCTGTCACTTCAGCTGCTTACTCTAAAGGATTCGGAATCTATGCGCCGGTTGATTTTCCGGCGAGTGATG…
LOC108201493	ACCACACTTTCCTTAATCACTTGAACTAATTATCTAGGCTTTGCCCAACAAAGCCACTGTACCCTTGTTTTCACTCGTTGATTACTCTACGATTACTCTACAAGATGATATAATACATACAGTTATGTGTATATCTTGTTTCGCATTTCTCAAGGTGTGAAATATTTTACAGCAGGCAGTAGTAGCAAAGTTCCAGAGAGCAAAGTAGGCGGGTTTAGATTTTTCACTGGATTGGTCGTGGGCTCCTCTGGGAACGACACCCCATGTTGAATGGATGCAACACCGAGAAAACGAGGCATGCCAAAACTGTTCCTTACGAAAGAGATGGTGGAGGAACATAGGGCTTTAAAGCTTCTCCATTACAAATCTCAACGGAATTTGGGGATGTCTCGTGAGTGT…
LOC108201493	ACCACACTTTCCTTAATCACTTGAACTAATTATCTAGGCTTTGCCCAACAAAGCCACTGTACCCTTGTTTTCACTCGTTGATTACTCTACGATTACTCTACAAGATGATATAATACATACAGTTATGTGTATATCTTGTTTCGCATTTCTCAAGGTGTGAAATATTTTACAGCAGGCAGTAGTAGCAAAGTTCCAGAGAGCAAAGTAGGCGGGTTTAGATTTTTCACTGGATTGGTCGTGGGCTCCTCTGGGAACGACACCCCATGTTGAATGGATGCAACACCGAGAAAACGAGGCATGCCAAAACTGTTCCTTACGAAAGAGATGGTGGAGGAACATAGGGCTTTAAAGCTTCTCCATTACAAATCTCAACGGAATTTGGGGATGTCTCGTGAGTGT…
LOC108223424	TTGACTTATGCGGCCCCCTTTTTCCTCCTCTTTTAAATTTATCTTTCATTTTGAAAATTCAAATTTCAGTGCTCTATTATTGTTCTTCTACTCGCTCCCGATCCATCTCTCCATTTCTCTACTCTGCTTTTGTTCTGTTTTCCCCCATAATCTCTGTCTGCTTTATCCCCGAGCTTCCTCCGCCATTTTGTTATTAACAAGCGACTGTAATTTACAATGGGTCGGCCTAACAATATGTCTGATTCTGATTTTGATGGGTTGGATCATGGTTGGAGGTCTCCTGATTTTAGTTTTCATTCATCTATGCCATCTGGCAGCGTCGTACATTTGCTTCAAGTTGACCACACCGGGCTTGCAGCTACCCGTGGCCACTGTTCCGGCGACAAGCATGGTAAAGAT…
LOC108223424	TTGACTTATGCGGCCCCCTTTTTCCTCCTCTTTTAAATTTATCTTTCATTTTGAAAATTCAAATTTCAGTGCTCTATTATTGTTCTTCTACTCGCTCCCGATCCATCTCTCCATTTCTCTACTCTGCTTTTGTTCTGTTTTCCCCCATAATCTCTGTCTGCTTTATCCCCGAGCTTCCTCCGCCATTTTGTTATTAACAAGCGACTGTAATTTACAATGGGTCGGCCTAACAATATGTCTGATTCTGATTTTGATGGGTTGGATCATGGTTGGAGGTCTCCTGATTTTAGTTTTCATTCATCTATGCCATCTGGCAGCGTCGTACATTTGCTTCAAGTTGACCACACCGGGCTTGCAGCTACCCGTGGCCACTGTTCCGGCGACAAGCATGGTAAAGAT…
LOC108223424	TTGACTTATGCGGCCCCCTTTTTCCTCCTCTTTTAAATTTATCTTTCATTTTGAAAATTCAAATTTCAGTGCTCTATTATTGTTCTTCTACTCGCTCCCGATCCATCTCTCCATTTCTCTACTCTGCTTTTGTTCTGTTTTCCCCCATAATCTCTGTCTGCTTTATCCCCGAGCTTCCTCCGCCATTTTGTTATTAACAAGCGACTGTAATTTACAATGGGTCGGCCTAACAATATGTCTGATTCTGATTTTGATGGGTTGGATCATGGTTGGAGGTCTCCTGATTTTAGTTTTCATTCATCTATGCCATCTGCGTCGTACATTTGCTTCAAGTTGACCACACCGGGCTTGCAGCTACCCGTGGCCACTGTTCCGGCGACAAGCATGGTAAAGATACTG…
LOC108223424	TTGACTTATGCGGCCCCCTTTTTCCTCCTCTTTTAAATTTATCTTTCATTTTGAAAATTCAAATTTCAGTGCTCTATTATTGTTCTTCTACTCGCTCCCGATCCATCTCTCCATTTCTCTACTCTGCTTTTGTTCTGTTTTCCCCCATAATCTCTGTCTGCTTTATCCCCGAGCTTCCTCCGCCATTTTGTTATTAACAAGCGACTGTAATTTACAATGGGTCGGCCTAACAATATGTCTGATTCTGATTTTGATGGGTTGGATCATGGTTGGAGGTCTCCTGATTTTAGTTTTCATTCATCTATGCCATCTGCGTCGTACATTTGCTTCAAGTTGACCACACCGGGCTTGCAGCTACCCGTGGCCACTGTTCCGGCGACAAGCATGGTAAAGATACTG…
LOC108223424	TTGACTTATGCGGCCCCCTTTTTCCTCCTCTTTTAAATTTATCTTTCATTTTGAAAATTCAAATTTCAGTGCTCTATTATTGTTCTTCTACTCGCTCCCGATCCATCTCTCCATTTCTCTACTCTGCTTTTGTTCTGTTTTCCCCCATAATCTCTGTCTGCTTTATCCCCGAGCTTCCTCCGCCATTTTGTTATTAACAAGCGACTGTAATTTACAATGGGTCGGCCTAACAATATGTCTGATTCTGATTTTGATGGGTTGGATCATGGTTGGAGGTCTCCTGATTTTAGTTTTCATTCATCTATGCCATCTGGCAGCGTCGTACATTTGCTTCAAGTTGACCACACCGGGCTTGCAGCTACCCGTGGCCACTGTTCCGGCGACAAGCATGGTAAAGAT…
LOC108204626	TGTAGAGAAAGCTGGTAAAAAATTGGTTCAGAACATGAGAAGAGTGCAGGAGTAGTGACTAGCGAGGAGCTTTGATTCAAAATTGCAAGACATTTAGAAGGTCTAGGGTTTTGCCTGTGAGCGGAGATGGCAGCGGCAGCTTATAGGTGCGGCGGTAGTAGACTGTTATCGTCTTCCAAACGCCTTTTCATATCTAAAACCCTAACCCCCAAATCCTTTCCCACCCCTTCCGCATCAACCTCTTTCACACCTCTAAGGTTTGCCTCGGTTTTGGCAAGCGTGGAGTCGTTGATGCCACTTCATTCTGCCATTGCCTCTGCCCGTCTTACTTCCAAAATTGCGCTTCACTCGTCTTGCTGGAGCTGCCTTTCTCAGGACTTTGCAGTTCCTCGGTGAAAA…
LOC108205429	ATTATTTAAATCACACCTACAGGCTCCTGCTCTGAATTTGTGAGAAAAGTATTTAACACAGGAGGCGATTCAGTCCTCCACTATCTCATGTAATTAATCACATGGAAGCAATTAGGAAACAAGCATCCAAGCTCCGAGAGCAAGTCTCTCGCCAACAACAGGCTGTCCTCAAGCAATTTGGAGCTGGTGGTTATGGTGGTTCTGATTTTGCTAGTGATGGAGCAGAATTTCAACAGCACCAGAAACTTGAAAAATTATACATATCCACACGCGCTGCGAAGCATTTTCAAAGGGATATTGTACGTGGTGTAGAAGGTTATATTGTTACTGGCTCCAAGCAAGTTGAAATAGGGACAAAGTTATCAGAAGATAGCAGAAAATATGGTGTTGAGAATACAT…
LOC108204864	GCACTATAGTTGCCTTGTTGATTTGTTTTGCAGGGCTGGTGAGTTGGATAAGGCATGGACACTTATTGATGGTATGCCCCATTATAAGAACGGCAAGTTCACTGTTTCTTTGTGGGGAGCATTGCTGAGTGCCTGTAGTGATTATGGGAATGTCTCTTGCGGTAGATTGGCTGCTCAAAGAGCACTTGAACTAGATCCTCAAAATGTTGGAATATATGTTCTCTTGTCAAATATGTATGCAAGGCATCAAATGTGGAAAGAAACTGATGATCTAAGGGATTTAATCAAAGGAACGGGGCTAAGGAAAGATGTTGGTACAAGTCGGATAGAGGTCACAAATTGAATTGAGGCAGTCGCTTAAAGTACTCTTTATTCAAGTTGGGTATCTTTCTTTGCCCC…
LOC108194522	CAACTACATCTTTCTGCTCACTGCAAACAAATACATCCATCTTCTATATTGATCTTATCAACTTGGTTTCCCTGCAAAACACATAGCAATGGCCGTTCTCAAAGTTGTGATTGCTGCACTCTTTGTCTCTCTGTTTGTTCTCCATCTTGTTCACGCAACAGATATGGGGAGCAACTCGGAGTCATCAGTGACAAGTTATCCGAAGGGAAAAATGGATTGTGGAGGAGCATGCGCAGCAAGGTGCATATTATCATCTAGGCCGAGATTGTGTAAGAGGGCTTGTGGAACATGTTGCGCACGCTGTAACTGCGTCCCGGCAGGAACGTCCGGCAACTTGGACACTTGTGCTTGTTATGCCAATATGACCACTCACAATTAGGGCTGGCAATATCAGACACG…
LOC108205463	AGAAAATACTGACACTTTTACAAGGTGGAAACTAATAAAGCATAGAAGATTCTATGTCATGCTACAACAGCAAGGCAAGTCTATTCAAGTCTCTCTCTCCCCTTCATCACTTTCACCTTGATGCTTCCTTAATCTTTCTATATGGCTAACTTGAGTTACAAGAATCTAGAGATCAGTTGTACTGATTCCGTCAGCCAAACCAGGCCTCAAAACTGATCTACTTCTTTTTCTTTGATTTGTTAGACTGAGTATATGCAGTTCC
LOC108205271	TTAATTAATAAAATTATAACCAGGACAAATGCATTGTATTTCAACTTTACAAATAGAAGCAAAAGCTTACAAATACAATCTTGAAATAAACATTCAACGTGTAATGTAAATACATGACTGATATTAACGTTCTTTTATCAGGTAGTACCACAATCACTCGGCACTAATCTGCAATCTTCAACTATATCTCTATATCCAGAAAGGTATTTATTATTGCTGGAACAAGGGATATTACCCGAAATCTTTCAATAAAAGAAAACAACAGTTTATGTGAACTTCAAATAAAAACAGAAATATCATGGAGGCCTCAAGGGTGGTAAGGTGGTAGCGGTGGGAAGGTCAATTTAGGGTGGGGGTAGAATTTTTTAGGAATCTTGGGTACTTTTGGGTGGGGGAAGA…
LOC108205271	AAGAAATAAGAACAAATGAATGCATTAATTAATAAAATTATAACCAGGACAAATGCATTGTATTTCAACTTTACAAATAGAAGCAAAAGCTTACAAATACAATCTTGAAATAAACATTCAACGTGTAATGTAAATACATGACTGATATTAACGTTCTTTTATCAGGTAGTACCACAATCACTCGGCACTAATCTGCAATCTTCAACTATATCTCTATATCCAGAAAGGTATTTATTATTGCTGGAACAAGGGATATTACCCGAAATCTTTCAATAAAAGAAAACAACAGTTTATGTGAACTTCAAATAAAAACAGAAATATCATGGAGGCCTCAAGGGTGGTAAGGTGGTAGCGGTGGGAAGGTCAATTTAGGGTGGGGGTAGAATTTTTTAGGAATCT…
LOC108205271	AAGAAATAAGAACAAATGAATGCATTAATTAATAAAATTATAACCAGGACAAATGCATTGTATTTCAACTTTACAAATAGAAGCAAAAGCTTACAAATACAATCTTGAAATAAACATTCAACGTGTAATGTAAATACATGACTGATATTAACGTTCTTTTATCAGGTAGTACCACAATCACTCGGCACTAATCTGCAATCTTCAACTATATCTCTATATCCAGAAAGGTATTTATTATTGCTGGAACAAGGGATATTACCCGAAATCTTTCAATAAAAGAAAACAACAGTTTATGTGAACTTCAAATAAAAACAGAAATATCATGGAGGCCTCAAGGGTGGTAAGGTGGTAGCGGTGGGAAGGTCAATTTAGGGTGGGGGTAGAATTTTTTAGGAATCT…
LOC108205139	ACACAAATAATCGTCTCTACAGAGAATTTAAAGATAGACAAATATCCAAGTGAAAGTATACAGTTCGTGCAAGTACTCATTTCCCCCCTGAGCATTTAAAGATAAAACAGCAACAATGCAAGTCTACATATGCAATAAACTCGACAAGTGACTGAGTTCCACAGATAAGCATCCAGGGTACATAGATACTAAAATGAACACTTAATCCTACACCGGAAGATCATTTACAAAAAGGGTCATTCAACTTGAACATGGCTTCAGCAATAAAGCATTCTTATTGATAGTTTCCACCAGCTGTGTTCGGAGGGTAGCTGTTCTGATACCCTCTGTCCGGACCTGGACCAGATGGATAGCCGCCATTGCTTGGCATGTTCCTCTGCTCAAAACTTTCAGTTTGCC…
LOC108205139	ATAAATAATTCTTGTTACAACCTCAATTTATATCGCTTAAACCTCTCACACTTTCTAGGGTTTTATTTTATCACTCCCGTTTCACACTAAAACAATGGCGACTCGCTCCATTTCTAGGGTTTTATCGCGCTCCCTCTCCTCTCTCCGCGTCAAATCGCCGTCATGCCACCACTCCACTATTTCTCGTCCCCGCCCTCTCGCAGCCGTTGTCGACACTTTCCGTCAAATCTCTCCGGCGGCGACGATCGCTCGCGGTTTCGCCACTCGACAAACGACGTCGTCGCTGAACGATTCGAGCCCCAACTGGTCTAATCGACCTCCGAAAGAGACGATTTTGTTGGATGGGTGTGATTTTGAACACTGGCTTGTGGTGGTTGAGAAACCCGAGGGGGATCCGAC…
LOC108205139	TCGTCTCTACAGAGAATTTAAAGATAGACAAATATCCAAGTGAAAGTATACAGTTCGTGCAAGTACTCATTTCCCCCCTGAGCATTTAAAGATAAAACAGCAACAATGCAAGTCTACATATGCAATAAACTCGACAAGTGACTGAGTTCCACAGATAAGCATCCAGGGTACATAGATACTAAAATGAACACTTAATCCTACACCGGAAGATCATTTACAAAAAGGGTCATTCAACTTGAACATGGCTTCAGCAATAAAGCATTCTTATTGATAGTTTCCACCAGCTGTGTTCGGAGGGTAGCTGTTCTGATACCCTCTGTCCGGACCTGGACCAGATGGATAGCCGCCATTGCTTGGCATGTTCCTCTGCTCAAAACTTTCAGTTTGCCTGTGTTGCGC…
LOC108205139	ATAAATAATTCTTGTTACAACCTCAATTTATATCGCTTAAACCTCTCACACTTTCTAGGGTTTTATTTTATCACTCCCGTTTCACACTAAAACAATGGCGACTCGCTCCATTTCTAGGGTTTTATCGCGCTCCCTCTCCTCTCTCCGCGTCAAATCGCCGTCATGCCACCACTCCACTATTTCTCGTCCCCGCCCTCTCGCAGCCGTTGTCGACACTTTCCGTCAAATCTCTCCGGCGGCGACGATCGCTCGCGGTTTCGCCACTCGACAAACGACGTCGTCGCTGAACGATTCGAGCCCCAACTGGTCTAATCGACCTCCGAAAGAGACGATTTTGTTGGATGGGTGTGATTTTGAACACTGGCTTGTGGTGGTTGAGAAACCCGAGGGGGATCCGAC…
LOC108205139	ATAAATAATTCTTGTTACAACCTCAATTTATATCGCTTAAACCTCTCACACTTTCTAGGGTTTTATTTTATCACTCCCGTTTCACACTAAAACAATGGCGACTCGCTCCATTTCTAGGGTTTTATCGCGCTCCCTCTCCTCTCTCCGCGTCAAATCGCCGTCATGCCACCACTCCACTATTTCTCGTCCCCGCCCTCTCGCAGCCGTTGTCGACACTTTCCGTCAAATCTCTCCGGCGGCGACGATCGCTCGCGGTTTCGCCACTCGACAAACGACGTCGTCGCTGAACGATTCGAGCCCCAACTGGTCTAATCGACCTCCGAAAGAGACGATTTTGTTGGATGGGTGTGATTTTGAACACTGGCTTGTGGTGGTTGAGAAACCCGAGGGGGATCCGAC…
LOC108204357	CTGTCATAACTCCGTTACAATATCTGTTAACTAAGTGGCGACGCTGTGGGGAGATGAAAAGCTGAAGACATTCCTATTTCTCAAGAGCATTATCAATCTCTCACCACTCTAAAACCCTCCCCGTGGCCGCCGTCTCCAGCCACATGAAACTCCCTACCACCGCCAATTGTTAGGATGGAGAAATTTGGTTTTGGGTTGAAATTGGTTTCCTAGAGAAGATTTGCCCTTTCACTGTTATGGAATTGAGGATGAGGGAGGAGAGAAGAATACCTATTAGCTTCTCGATGGCTTTGCCCAGAGGGTTTAATTTGCAAAAGAAGGTAAGGGATTGGGTTACTGAGGGACGAAATATGCCATATATTTCGCCTTATGAGGGTGCTTTTTATTTGGGCCATGATA…
LOC108204357	TCTGTCATAACTCCGTTACAATATCTGTTAACTAAGTGGCGACGCTGTGGGGAGATGAAAAGCTGAAGACATTCCTATTTCTCAAGAGCATTATCAATCTCTCACCACTCTAAAACCCTCCCCGTGGCCGCCGTCTCCAGCCACATGAAACTCCCTACCACCGCCAGTAAGTTCATCGATAAATACCCATCTATATTTATTCACATCTTGTCTCTTAAACCTTTGTGACACCGAAAGACTTGCGAAGCTTTTGATGTTGACGAAAGAAACAAGCTTCCTTTATTTGTTGTTGATAAGATTGTTAGGATGGAGAAATTTGGTTTTGGGTTGAAATTGGTTTCCTAGAGAAGATTTGCCCTTTCACTGTTATGGAATTGAGGATGAGGGAGGAGAGAAGAA…
LOC108204357	CTGTCATAACTCCGTTACAATATCTGTTAACTAAGTGGCGACGCTGTGGGGAGATGAAAAGCTGAAGACATTCCTATTTCTCAAGAGCATTATCAATCTCTCACCACTCTAAAACCCTCCCCGTGGCCGCCGTCTCCAGCCACATGAAACTCCCTACCACCGCCAATTGTTAGGATGGAGAAATTTGGTTTTGGGTTGAAATTGGTTTCCTAGAGAAGATTTGCCCTTTCACTGTTATGGAATTGAGGATGAGGGAGGAGAGAAGAATACCTATTAGCTTCTCGATGGCTTTGCCCAGAGGGTTTAATTTGCAAAAGAAGGTAAGGGATTGGGTTACTGAGGGACGAAATATGCCATATATTTCGCCTTATGAGGGTGCTTTTTATTTGGGCCATGATA…
LOC108204357	TCTGTCATAACTCCGTTACAATATCTGTTAACTAAGTGGCGACGCTGTGGGGAGATGAAAAGCTGAAGACATTCCTATTTCTCAAGAGCATTATCAATCTCTCACCACTCTAAAACCCTCCCCGTGGCCGCCGTCTCCAGCCACATGAAACTCCCTACCACCGCCAGTAAGTTCATCGATAAATACCCATCTATATTTATTCACATCTTGTCTCTTAAACCTTTGTGACACCGAAAGACTTGCGAAGCTTTTGATGTTGACGAAAGAAACAAGCTTCCTTTATTTGTTGTTGATAAGGTTAAATTTGATTTGGGCTTACCTTTTAGTTATGCTTTTGCTTTACTTCCTGACTTTCCTGATTATTTTCAGATTGTTAGGATGGAGAAATTTGGTTTTGGG…
LOC108204357	CTGTCATAACTCCGTTACAATATCTGTTAACTAAGTGGCGACGCTGTGGGGAGATGAAAAGCTGAAGACATTCCTATTTCTCAAGAGCATTATCAATCTCTCACCACTCTAAAACCCTCCCCGTGGCCGCCGTCTCCAGCCACATGAAACTCCCTACCACCGCCAATTGTTAGGATGGAGAAATTTGGTTTTGGGTTGAAATTGGTTTCCTAGAGAAGATTTGCCCTTTCACTGTTATGGAATTGAGGATGAGGGAGGAGAGAAGAATACCTATTAGCTTCTCGATGGCTTTGCCCAGAGGGTTTAATTTGCAAAAGAAGGTAAGGGATTGGGTTACTGAGGGACGAAATATGCCATATATTTCGCCTTATGAGGGTGCTTTTTATTTGGGCCATGATA…
LOC108204357	TCTGTCATAACTCCGTTACAATATCTGTTAACTAAGTGGCGACGCTGTGGGGAGATGAAAAGCTGAAGACATTCCTATTTCTCAAGAGCATTATCAATCTCTCACCACTCTAAAACCCTCCCCGTGGCCGCCGTCTCCAGCCACATGAAACTCCCTACCACCGCCAGTAAGTTCATCGATAAATACCCATCTATATTTATTCACATCTTGTCTCTTAAACCTTTGTGACACCGAAAGACTTGCGAAGCTTTTGATGTTGACGAAAGAAACAAGCTTCCTTTATTTGTTGTTGATAAGGTTAAATTTGATTTGGGCTTACCTTTTAGTTATGCTTTTGCTTTACTTCCTGACTTTCCTGATTATTTTCAGATTGTTAGGATGGAGAAATTTGGTTTTGGG…
LOC108204357	CTGTCATAACTCCGTTACAATATCTGTTAACTAAGTGGCGACGCTGTGGGGAGATGAAAAGCTGAAGACATTCCTATTTCTCAAGAGCATTATCAATCTCTCACCACTCTAAAACCCTCCCCGTGGCCGCCGTCTCCAGCCACATGAAACTCCCTACCACCGCCAATTGTTAGGATGGAGAAATTTGGTTTTGGGTTGAAATTGGTTTCCTAGAGAAGATTTGCCCTTTCACTGTTATGGAATTGAGGATGAGGGAGGAGAGAAGAATACCTATTAGCTTCTCGATGGCTTTGCCCAGAGGGTTTAATTTGCAAAAGAAGGTAAGGGATTGGGTTACTGAGGGACGAAATATGCCATATATTTCGCCTTATGAGGGTGCTTTTTATTTGGGCCATGATA…
LOC108204357	TCTGTCATAACTCCGTTACAATATCTGTTAACTAAGTGGCGACGCTGTGGGGAGATGAAAAGCTGAAGACATTCCTATTTCTCAAGAGCATTATCAATCTCTCACCACTCTAAAACCCTCCCCGTGGCCGCCGTCTCCAGCCACATGAAACTCCCTACCACCGCCAGTAAGTTCATCGATAAATACCCATCTATATTTATTCACATCTTGTCTCTTAAACCTTTGTGACACCGAAAGACTTGCGAAGCTTTTGATGTTGACGAAAGAAACAAGCTTCCTTTATTTGTTGTTGATAAGATTGTTAGGATGGAGAAATTTGGTTTTGGGTTGAAATTGGTTTCCTAGAGAAGATTTGCCCTTTCACTGTTATGGAATTGAGGATGAGGGAGGAGAGAAGAA…
LOC108204357	CTGTCATAACTCCGTTACAATATCTGTTAACTAAGTGGCGACGCTGTGGGGAGATGAAAAGCTGAAGACATTCCTATTTCTCAAGAGCATTATCAATCTCTCACCACTCTAAAACCCTCCCCGTGGCCGCCGTCTCCAGCCACATGAAACTCCCTACCACCGCCAATTGTTAGGATGGAGAAATTTGGTTTTGGGTTGAAATTGGTTTCCTAGAGAAGATTTGCCCTTTCACTGTTATGGAATTGAGGATGAGGGAGGAGAGAAGAATACCTATTAGCTTCTCGATGGCTTTGCCCAGAGGGTTTAATTTGCAAAAGAAGGTAAGGGATTGGGTTACTGAGGGACGAAATATGCCATATATTTCGCCTTATGAGGGTGCTTTTTATTTGGGCCATGATA…
LOC108204357	CTGTCATAACTCCGTTACAATATCTGTTAACTAAGTGGCGACGCTGTGGGGAGATGAAAAGCTGAAGACATTCCTATTTCTCAAGAGCATTATCAATCTCTCACCACTCTAAAACCCTCCCCGTGGCCGCCGTCTCCAGCCACATGAAACTCCCTACCACCGCCAATTGTTAGGATGGAGAAATTTGGTTTTGGGTTGAAATTGGTTTCCTAGAGAAGATTTGCCCTTTCACTGTTATGGAATTGAGGATGAGGGAGGAGAGAAGAATACCTATTAGCTTCTCGATGGCTTTGCCCAGAGGGTTTAATTTGCAAAAGAAGGTAAGGGATTGGGTTACTGAGGGACGAAATATGCCATATATTTCGCCTTATGAGGGTGCTTTTTATTTGGGCCATGATA…
LOC108204342	ACCATTTTGTAAGATAACAAAATACTCTGTCAGAACGAGACTCTCACAGAAGATAGATACAGATACAGTAGGCAATAGAACTTCCCCTTTTCACCTTCACTGTGTGTGTATATGTGTGTTTCTTAAGCTTATCTTCTTTATAATCCCCTTCAACTTATGAACCCATTTTCCATGCTCTCAACAATTTTAGAGCTCCTCAAAGGCTTTTAACCAACCAGTGAAGTTCATTTTACTTTACAAAGAAAATTTTAAGAATGAGCCTGTACACTAATATGGCTCTAACCAGTGACAAAAGACCGAGCACTATAGCAAAGGCAACAAGTTTGAACCCAAATGCTGTGGAATTTGTCCCTTTTTCCCTAAGATCATCCCCTGGAAACAGTAGTGCCGTAGATGTGT…
LOC108223476	CTTTAAGCCGAAGAGATCATTGCTGACAAGTAAAAAAACAAAAGAACAACCTCACTCACCTCTTTTACAAATCTTTTACAAATCTCAAGCAGAATATGCACTCCCACACATAACACACACACACACACACATCACAATACACACACTAATCAGAGATGGCGGAGCAGCAGCAACAACACAATCCCGAGGTGGCTGAACCGCAAAAACAAGAGACGAGATGGTGCGTAGTGACAGGAGGAAGAGGCTTCGCGGCGCGGCATCTGGTAGAAATGCTGATCCGTTTCGACATGTTCTCTGTTCGTATCGCCGATTTAGCTCCTTCTATTCTTCTCGATCCTTCTGAGCAAACCGGTGCCCTAGGTCAAGCTCTTCAATCAGGCCGTGCTTCTTATGTCTCCG…
LOC108202969	CTCATGTGTGCGTATATAAGCGTTTGAGGTTGGGGTTTATAGGGGTGAGAGTTTTAATATAAAGCCGCCACTCTTCTTCTCTCTTCAATCTCATATCAATTTCATAGCCTCCGTTTCTATTTTTCTTCCCAGTATCCACCATTTGCATTGCATTTCTTCACACCATCTATAATAATTATACACCTTGTTAGTTTTAAAGATACATTAGAGATATATCCACATAAAGTTGAGTTCTTGCAAGCAGGGACCTGGGTTTATAATCTTTATTAGTGGAAAGGGCTTTCTTGTTTTGAGGTGTATTTGAAGCTGAAAAGAAACAAGAATGAAATACGTTTTGGTGACTGGTGGAGTTGTGAGTGGTTTGGGAAAAGGAGTTACTGCTAGCAGTATTGGCCTAAT…
LOC108204872	AAAGTACCTCACCCGGGGTCTGGGGCGGGTTCAGATTTTACCCGTTTCTTTTACTTTTCCCAAATCGCTTTCTTCACCCTCACATCAATAATCACCGAATTGGGGTTCCATTTAGCAAATTAACCCTCTCAGAGTCTGCAACTTAAAGCTCACATCAAGCATATACTAATGTTATTATCAAGAAACATATATCTGAAGTGAAGCATTGAGTTCTAAGCACTAGAATTACTTGGGATTTGAGAAAGTTTGGATTTTGATTGAGAAATGTTTGGGAATAGTTTGGTGCATGTTTCATCAACATGCCCTGCTGTAATCTCTTCGAATTTGGCTTCACGAAATGGGGTTGTGAGCTTGTTGCCTAATCTGAATTTGAAACTCCGAAAGAGGTTCTCGGTTATA…
LOC108204381	AATACTAGGTGAATTTAGAAGAATTTGCACATAGAAAAAAGCTGAAGTTGGTAGTGATACACCCCTTCTTTCACGTCAACACCCATTTCTCCCTCCTACCATTCTTCCCTGTATCTATCTCTGTATCTATATAGTATTCCACAAACAAGTCTCCTCTGCCTCCTCTCTTCCAAGTCCACTCTTGACTTTTCTCTCTCTCTCTCTCTCTCTTCTTAATCTCTCCCGGTTCACAAACTTCACACCCCATCTTCTCTTCTCACACAACCATGTCAAGAAGCTTGCTGGGTGTTCTCTTTTGTGTCGTTTTGGTGAGTGTGAATGGGAGATTTGTGGTGGAGAAAGAGAGCATAAGAGTGCTCTCGCCTTATAAGCTGAGGTCGAAGCATGATGCTGCTATTG…
LOC108204381	AATACTAGGTGAATTTAGAAGAATTTGCACATAGAAAAAAGCTGAAGTTGGTAGTGATACACCCCTTCTTTCACGTCAACACCCATTTCTCCCTCCTACCATTCTTCCCTGTATCTATCTCTGTATCTATATAGTATTCCACAAACAAGTCTCCTCTGCCTCCTCTCTTCCAAGTCCACTCTTGACTTTTCTCTCTCTCTCTCTCTCTCTTCTTAATCTCTCCCGGTTCACAAACTTCACACCCCATCTTCTCTTCTCACACAACCATGTCAAGAAGCTTGCTGGGTGTTCTCTTTTGTGTCGTTTTGGTGAGTGTGAATGGGAGATTTGTGGTGGAGAAAGAGAGCATAAGAGTGCTCTCGCCTTATAAGCTGAGGTCGAAGCATGATGCTGCTATTG…
LOC108204381	TACGTAGCACCAAACAACATTTACTTAAAATCTAAATCAACTCTAATTTCATTACAATTGAATACTAGGTGAATTTAGAAGAATTTGCACATAGAAAAAAGCTGAAGTTGGTAGTGATACACCCCTTCTTTCACGTCAACACCCATTTCTCCCTCCTACCATTCTTCCCTGTATCTATCTCTGTATCTATATAGTATTCCACAAACAAGTCTCCTCTGCCTCCTCTCTTCCAAGTCCACTCTTGACTTTTCTCTCTCTCTCTCTCTCTCTTCTTAATCTCTCCCGGTTCACAAACTTCACACCCCATCTTCTCTTCTCACACAACCATGTCAAGAAGCTTGCTGGGTGTTCTCTTTTGTGTCGTTTTGGTGAGTGTGAATGGGAGATTTGTGGTGGAGA…
LOC108204381	AATACTAGGTGAATTTAGAAGAATTTGCACATAGAAAAAAGCTGAAGTTGGTAGTGATACACCCCTTCTTTCACGTCAACACCCATTTCTCCCTCCTACCATTCTTCCCTGTATCTATCTCTGTATCTATATAGTATTCCACAAACAAGTCTCCTCTGCCTCCTCTCTTCCAAGTCCACTCTTGACTTTTCTCTCTCTCTCTCTCTCTCTTCTTAATCTCTCCCGGTTCACAAACTTCACACCCCATCTTCTCTTCTCACACAACCATGTCAAGAAGCTTGCTGGGTGTTCTCTTTTGTGTCGTTTTGGTGAGTGTGAATGGGAGATTTGTGGTGGAGAAAGAGAGCATAAGAGTGCTCTCGCCTTATAAGCTGAGGTCGAAGCATGATGCTGCTATTG…
LOC108204381	AATACTAGGTGAATTTAGAAGAATTTGCACATAGAAAAAAGCTGAAGTTGGTAGTGATACACCCCTTCTTTCACGTCAACACCCATTTCTCCCTCCTACCATTCTTCCCTGTATCTATCTCTGTATCTATATAGTATTCCACAAACAAGTCTCCTCTGCCTCCTCTCTTCCAAGTCCACTCTTGACTTTTCTCTCTCTCTCTCTCTCTCTTCTTAATCTCTCCCGGTTCACAAACTTCACACCCCATCTTCTCTTCTCACACAACCATGTCAAGAAGCTTGCTGGGTGTTCTCTTTTGTGTCGTTTTGGTGAGTGTGAATGGGAGATTTGTGGTGGAGAAAGAGAGCATAAGAGTGCTCTCGCCTTATAAGCTGAGGTCGAAGCATGATGCTGCTATTG…
LOC108204381	AATACTAGGTGAATTTAGAAGAATTTGCACATAGAAAAAAGCTGAAGTTGGTAGTGATACACCCCTTCTTTCACGTCAACACCCATTTCTCCCTCCTACCATTCTTCCCTGTATCTATCTCTGTATCTATATAGTATTCCACAAACAAGTCTCCTCTGCCTCCTCTCTTCCAAGTCCACTCTTGACTTTTCTCTCTCTCTCTCTCTCTCTTCTTAATCTCTCCCGGTTCACAAACTTCACACCCCATCTTCTCTTCTCACACAACCATGTCAAGAAGCTTGCTGGGTGTTCTCTTTTGTGTCGTTTTGGTGAGTGTGAATGGGAGATTTGTGGTGGAGAAAGAGAGCATAAGAGTGCTCTCGCCTTATAAGCTGAGGTCGAAGCATGATGCTGCTATTG…
LOC108204381	AATACTAGGTGAATTTAGAAGAATTTGCACATAGAAAAAAGCTGAAGTTGGTAGTGATACACCCCTTCTTTCACGTCAACACCCATTTCTCCCTCCTACCATTCTTCCCTGTATCTATCTCTGTATCTATATAGTATTCCACAAACAAGTCTCCTCTGCCTCCTCTCTTCCAAGTCCACTCTTGACTTTTCTCTCTCTCTCTCTCTCTCTTCTTAATCTCTCCCGGTTCACAAACTTCACACCCCATCTTCTCTTCTCACACAACCATGTCAAGAAGCTTGCTGGGTGTTCTCTTTTGTGTCGTTTTGGTGAGTGTGAATGGGAGATTTGTGGTGGAGAAAGAGAGCATAAGAGTGCTCTCGCCTTATAAGCTGAGGTCGAAGCATGATGCTGCTATTG…
LOC108205310	TACGTAGCACCAAACAACATTTACTTAAAATCTAAATCAACTCTAATTTCATTACAATTGAATACTAGGTGAATTTAGAAGAATTTGCACATAGAAAAAAGCTGAAGTTGGTAGTGATACACCCCTTCTTTCACGTCAACACCCATTTCTCCCTCCTACCATTCTTCCCTGTATCTATCTCTGTATCTATATAGTATTCCACAAACAAGTCTCCTCTGCCTCCTCTCTTCCAAGTCCACTCTTGACTTTTCTCTCTCTCTCTCTCTCTCTTCTTAATCTCTCCCGGTTCACAAACTTCACACCCCATCTTCTCTTCTCACACAACCATGTCAAGAAGCTTGCTGGGTGTTCTCTTTTGTGTCGTTTTGGTGAGTGTGAATGGGAGATTTGTGGTGGAGA…
LOC108205310	AATACTAGGTGAATTTAGAAGAATTTGCACATAGAAAAAAGCTGAAGTTGGTAGTGATACACCCCTTCTTTCACGTCAACACCCATTTCTCCCTCCTACCATTCTTCCCTGTATCTATCTCTGTATCTATATAGTATTCCACAAACAAGTCTCCTCTGCCTCCTCTCTTCCAAGTCCACTCTTGACTTTTCTCTCTCTCTCTCTCTCTCTTCTTAATCTCTCCCGGTTCACAAACTTCACACCCCATCTTCTCTTCTCACACAACCATGTCAAGAAGCTTGCTGGGTGTTCTCTTTTGTGTCGTTTTGGTGAGTGTGAATGGGAGATTTGTGGTGGAGAAAGAGAGCATAAGAGTGCTCTCGCCTTATAAGCTGAGGTCGAAGCATGATGCTGCTATTG…
LOC108205310	TACGTAGCACCAAACAACATTTACTTAAAATCTAAATCAACTCTAATTTCATTACAATTGAATACTAGGTGAATTTAGAAGAATTTGCACATAGAAAAAAGCTGAAGTTGGTAGTGATACACCCCTTCTTTCACGTCAACACCCATTTCTCCCTCCTACCATTCTTCCCTGTATCTATCTCTGTATCTATATAGTATTCCACAAACAAGTCTCCTCTGCCTCCTCTCTTCCAAGTCCACTCTTGACTTTTCTCTCTCTCTCTCTCTCTCTTCTTAATCTCTCCCGGTTCACAAACTTCACACCCCATCTTCTCTTCTCACACAACCATGTCAAGAAGCTTGCTGGGTGTTCTCTTTTGTGTCGTTTTGGTGAGTGTGAATGGGAGATTTGTGGTGGAGA…
LOC108205310	TACGTAGCACCAAACAACATTTACTTAAAATCTAAATCAACTCTAATTTCATTACAATTGAATACTAGGTGAATTTAGAAGAATTTGCACATAGAAAAAAGCTGAAGTTGGTAGTGATACACCCCTTCTTTCACGTCAACACCCATTTCTCCCTCCTACCATTCTTCCCTGTATCTATCTCTGTATCTATATAGTATTCCACAAACAAGTCTCCTCTGCCTCCTCTCTTCCAAGTCCACTCTTGACTTTTCTCTCTCTCTCTCTCTCTCTTCTTAATCTCTCCCGGTTCACAAACTTCACACCCCATCTTCTCTTCTCACACAACCATGTCAAGAAGCTTGCTGGGTGTTCTCTTTTGTGTCGTTTTGGTGAGTGTGAATGGGAGATTTGTGGTGGAGA…
LOC108197906	TTGATATCGTGTGTGGTCATATTCTATAAGACTGAGAGCATCTCCAAGCGGTTCATTGGTATGTGGTAAAGAAGAACAGCATAAGAATAGTCCATCCTTATGGTTTAATGTCTAAACAATATGATGCTGCAGTTGCAGACTTTGGAATTCCTTTTGATGGAGATGCAATGGTGGGGTCTGTACTGTATCCTCGTAAAAACTCACATGCATGCAAACCTTTTGATGGGGTTGAAAATGGTGAACAGCCCTTTAGGTCTAATTCTACTCCACCTATCATTCTCCTTGTTGATCGCGGAAGTAATATGTTTTTCTTTCCAGGATGCTTCTTCGCTTTGAAGGTCTATAATGGGATGCAGGCGGGTGCTGCAGCTGTTTTGGTGGCTGATGACATAGATGAGC…
LOC108204911	CACTGCTTATATATGGAGCACAAGTAGAGGGGAATTAGACGGCAGACGAGCGATAACCCTCAATTGCAAAACCCTAATTTGATTGGATACATACATTCAATTGGAGTAATCAGATCATTGAATTGAGAGATCGTATCTTGGATGGGGAAGAAGAAGAAGAGAGCAGCCGCAGCTGTATCAGATATTTGGTGTTATTATTGCGACAGAGAGTTTGATGACGAGAAGATATTAGTTCAGCATCAGAAAGCTAAGCACTTTAAGTGTCATGTTTGTCATAAGAAGCTTTCTACTGCTGGGGGCATGTCTATTCATGTTCTTCAGGTTCATAAAGAGACTGTTTCTAAGGTGCCAAATGCTAAAGAGGGTAGAGAGTCGACTGATATTGAAATATATGGAATG…
LOC108205169	AAAAAGTAATAATAATATTGGACCCTATGTATAAACCCTAAACAACACAACAGAGTCAGAGTCGCATAAACCCTAGAAAGCAAAGAAGAAAAATGGAGGCAGAGATGGAAGTGAAAAACAAGAACAATGTAATGTGTTTGTTATCCGACCCGGAAGGGAACCCACTCGGAGCCCCGATGTACCTCCCCCAAGACGCGGGTCCCAAGGAGCTTCAAATCACCGTCAATCAGCTTCTTACCAATGAGGAAAAATTACCTTATGCGTTCTATATATCAGACCAGGAGCTTCTTGTGCAACTAGGGGAATATTTACAGAAAAATAAAGTTTCTGTGGAGAAGGTACTCCCAATAGTTTATCAACCACAATCAGTTTTCCGTATTCGACCAGTTAACCGTTGCT…
LOC108205136	TTTTTATTATAATAAAATGCTCAAACACTTGTGTTTTCGAATAATTTTATACAATTTTATAGGTGTTCAATTTATCACTGTAAAATTAGTACCCCTATTTTAGGACAGACAAAAGTTGAAGAGTTTAAGGCAGTTGAGACAGAGGAAAGCATGAGTGGAAGAGGAAAGCTAGCTTGTGTAACAGGGGCGTCAGGATATATCGCTGCATGGCTTGTCAAGATGTTACTTGAACGTCATTACACTGTCAACGCCACTGTTCGATCTCTCAATGATCCACAGAAGACCGAACACCTCCTTGCACTTGACGGAGCCAAGGAAAGACTTCACTTGTTTGAAGCCAATTTACTTGAGGAGGGATCTTTTGATCCTGCGGTTGATGGATGTGACTGTGTCTTTCAT…
LOC108205136	ACTACGAATTCATGTAGTAAAAAAAAAAAAACGGAATATACACTTGTCCGAAAATTTGTTTGAGAAGAAGCAAAAGAGGAGAGCATGAGTGGAAAAGGAAAGCTAGTATGTGTAACAGGGGCATCAGGATATATAGCTTCATGGCTTGTCAAGATGTTGCTCGAACGTCATTACACTGTTAACGCCACTGTTCGATCTCTCAATGATCCGCAGAAGACTGAACACCTACTTGCACTTGATGGAGCCAAAGAAAGACTTCACTTGTTTGAAGCAAATTTACTCGAGGATGGATCTTTCGATCCTGCAGTTGAAGGATGTGATGGTGTCTTTCATACAGCATCACCTGTAAACCTTTCATCCTCTAACCCCCAGGTAGAACTGGTCGAGCCTGCAGTGAAG…
LOC108205136	TTTTTATTATAATAAAATGCTCAAACACTTGTGTTTTCGAATAATTTTATACAATTTTATAGGTGTTCAATTTATCACTGTAAAATTAGTACCCCTATTTTAGGACAGACAAAAGTTGAAGAGTTTAAGGCAGTTGAGACAGAGGAAAGCATGAGTGGAAGAGGAAAGCTAGCTTGTGTAACAGGGGCGTCAGGATATATCGCTGCATGGCTTGTCAAGATGTTACTTGAACGTCATTACACTGTCAACGCCACTGTTCGATCTCTCAAAGATCCACAGAAGACCGAACACCTCCTTGCACTTGACGGAGCCAAGGAAAGACTTCACTTGTTTGAAGCAAATTTACTTGAGGAGGGATCATTTGATCCTGCGGTTGATGGATGTGATTGTGTCTTTCAT…
LOC108205136	ACTACGAATTCATGTAGTAAAAAAAAAAAAACGGAATATACACTTGTCCGAAAATTTGTTTGAGAAGAAGCAAAAGAGGAGAGCATGAGTGGAAAAGGAAAGCTAGTATGTGTAACAGGGGCATCAGGATATATAGCTTCATGGCTTGTCAAGATGTTGCTCGAACGTCATTACACTGTTAACGCCACTGTTCGATCTCTCAATGATCCGCAGAAGACTGAACACCTACTTGCACTTGATGGAGCCAAAGAAAGACTTCACTTGTTTGAAGCAAATTTACTCGAGGATGGATCTTTCGATCCTGCAGTTGAAGGATGTGATGGTGTCTTTCATACAGCATCACCTGTAAACCTTTCATCCTCTAACCCCCAGGCAGAACTGGTCGAGCCTGCAGTGAAG…
LOC108205136	TTTTTATTATAATAAAATGCTCAAACACTTGTGTTTTCGAATAATTTTATACAATTTTATAGGTGTTCAATTTATCACTGTAAAATTAGTACCCCTATTTTAGGACAGACAAAAGTTGAAGAGTTTAAGGCAGTTGAGACAGAGGAAAGCATGAGTGGAAGAGGAAAGCTAGCTTGTGTAACAGGGGCGTCAGGATATATCGCTGCATGGCTTGTCAAGATGTTACTTGAACGTCATTACACTGTCAACGCCACTGTTCGATCTCTCAAAGATCCACAGAAGACCGAACACCTCCTTGCACTTGACGGAGCCAAGGAAAGACTTCACTTGTTTGAAGCAAATTTACTTGAGGAGGGATCATTTGATCCTGCGGTTGATGGATGTGATTGTGTCTTTCAT…
LOC108205136	TTTTTATTATAATAAAATGCTCAAACACTTGTGTTTTCGAATAATTTTATACAATTTTATAGGTGTTCAATTTATCACTGTAAAATTAGTACCCCTATTTTAGGACAGACAAAAGTTGAAGAGTTTAAGGCAGTTGAGACAGAGGAAAGCATGAGTGGAAGAGGAAAGCTAGCTTGTGTAACAGGGGCGTCAGGATATATCGCTGCATGGCTTGTCAAGATGTTACTTGAACGTCATTACACTGTCAACGCCACTGTTCGATCTCTCAAAGATCCACAGAAGACCGAACACCTCCTTGCACTTGACGGAGCCAAGGAAAGACTTCACTTGTTTGAAGCAAATTTACTTGAGGAGGGATCATTTGATCCTGCGGTTGATGGATGTGATTGTGTCTTTCAT…
LOC108205136	TTTTTATTATAATAAAATGCTCAAACACTTGTGTTTTCGAATAATTTTATACAATTTTATAGGTGTTCAATTTATCACTGTAAAATTAGTACCCCTATTTTAGGACAGACAAAAGTTGAAGAGTTTAAGGCAGTTGAGACAGAGGAAAGCATGAGTGGAAGAGGAAAGCTAGCTTGTGTAACAGGGGCGTCAGGATATATCGCTGCATGGCTTGTCAAGATGTTACTTGAACGTCATTACACTGTCAACGCCACTGTTCGATCTCTCAAAGATCCACAGAAGACCGAACACCTCCTTGCACTTGACGGAGCCAAGGAAAGACTTCACTTGTTTGAAGCAAATTTACTTGAGGAGGGATCATTTGATCCTGCGGTTGATGGATGTGATTGTGTCTTTCAT…
LOC108204489	AGCTGAGTGAACAAAACAGTCTCCAATAACTAAGCTATACATACACACAACTCTCTTTCTTGTTCAAATGGTGGTTAACGCCAAGTCCACTTCAATGGCGAAACCCGACCCGCCAAAATCCACAACCATAATCGAACCATTCGCAGAGTTCAAAGGCCCATCCACTTCTTCCCCCTCCTCCCAAATCAAATCTCTCGCCATCTCTACTCTCTCCGATCCTCAAACCCTAATTTACGCTGGCACTAATTCAGGTAATCTCCTCTTACTTTCACTCGACATTAATCAGCCAAGCAATGATTCTAAGCTTAAAAATGTTAAATTGTTGAAGTATGTTAAAGTTAGTACTGGCCCAGTTGATTCAATTCATGTGATTGATCATGTTAAGAGGGTTTTGGTTGT…
LOC108201473	ATATATCTTAAACACAAAACACAAGTGTTATGAGTTTGATGAAAAAATTGCTGATGATGATCAAACACCCCACAGTTTTTGCACAATACCCATTATATCTCTCTCTCAATTTTCTAGAGAGAGACACAAAAAATCGGGTAGTGTGTGAGAGAAAGAAGCAAACAGATGTAGACAGGCGTCCTAGGGGGGCCACGTGTTGTCTTCTCATTGGCTCGCGACTTTCTCTCTCTACACGATATACATACAAAGCAAAGCCTCTGGGTGCCATGTCAGTTTGAACATAAGTGGGAGATCTATGATTAAAGCTTGTGGAAGATACTTAATGGAATGATTCTATATAGATGAATTGCTTGGGACAAATATGAAGGATAACGACTCAAGTACAATGATTAACAGGAA…
LOC108203976	TCTGTATATTTTTGTCTCAATGCTAGCAAGTTTACAATGATAAAATCTTACTCTTAACGACTCCTCTTCCTCCACCACCACCATCACCATCATTTTACAACTAAGCACCAACATAACAATTAAATTACTCTATACTCTACTAATTATACTCATATAATTCTTCCATCACCAGCTCCACCACTCTCCTACTCCCCTGCTCTCTATATATACTTACAACATATATACGTATGTACTGGTGAAGTCAGATCTGGAGTTCCAAGCTTTTATTCCACCTACACTACCATTTTTAACTACTACTCTCGCTTTCTCAACTTCACCATAAGATATTGGATGTTGTTTAATATTTAAAGACCAATGTCTAGACAACATTTTCCAGCACAAGATGTGTCACCCAGATCA…
LOC108203976	GCTAGCAAGTTTACAATGATAAAATCTTACTCTTAACGACTCCTCTTCCTCCACCACCACCATCACCATCATTTTACAACTAAGCACCAACATAACAATTAAATTACTCTATACTCTACTAATTATACTCATATAATTCTTCCATCACCAGCTCCACCACTCTCCTACTCCCCTGCTCTCTATATATACTTACAACATATATACGTATGTACTGGTGAAGTCAGATCTGGAGTTCCAAGCTTTTATTCCACCTACACTACCATTTTTAACTACTACTCTCGCTTTCTCAACTTCACCATAAGATATTGGATGTTGTTTAATATTTAAAGACCAATGTCTAGACAACATTTTCCAGCACAAGATGTGTCACCCAGATCAAGAGAATATGAAGGTCCGTCG…
LOC108194373	AGGTTTTATAGGCCTGTACTGAGAGTTATGCTCCTTTTGTGAATAATTTCACCTACTCTGGATTAGTGTCCCTTTTGTGTTTTTTGTTGGACAGTGGTATCAGGATCTATAGGAGGAAGATGAGGCCACTAGATGAGAAAGAAACTACCCAAGTGTTTGAGAAGCTGTTCAATTTCACCGGAAATAATCTGAAGAACATTGTGGAAGCCCCTTCTCACGAAGGCCCTGAATCAAACCCCGGGCGATATTGCTTCCGCCTCAACAAGAACAGGGTATATTACGTTAGTGAGTCTCTTGTCAAGCGGGCCACCAACGTCAAGCGTGACAAACTCGTTTCTCTCGGTACCCAAATTGGAAAATTCACCAAAGGAGGAGCGTTTCATCTGACAATCCAGAGCT…
LOC108203470	GTAGTATCATTCTTCCTAATTATAGTAGTCTTCTTTCTATTCACATTCTCTCTCTCTATTCAATAATAGTACTATCTTGATTTTGTTCCAATTGTTCACAAGAACTTGCATCTGCAAAATCACATCTTTTATGGAAATCTTGAAGACTCTTTCTTGATAACCATCACTCCATAGCTCCACCATTGATGAAAGGAGTTCTAGCATGTAATAAGGAGTGCTAGAAGATGGAAAGAGCGAGATTGGATTTAAGAGTTCACCCTTCTGGATCTACACCATCAGAGGAATCAGCTTTGGATTTAGAAAGAAACTACTGTAATCATCAATATATTCCTTCCAGAAGCTCTTCACCATTGCAAGCTTTTGCAACAGGTGGTCAGCTTTCTGAGACTAGTGCTGCCT…
LOC108203470	GTAGTATCATTCTTCCTAATTATAGTAGTCTTCTTTCTATTCACATTCTCTCTCTCTATTCAATAATAGTACTATCTTGATTTTGTTCCAATTGTTCACAAGAACTTGCATCTGCAAAATCACATCTTTTATGGAAATCTTGAAGACTCTTTCTTGATAACCATCACTCCATAGCTCCACCATTGATGAAAGGAGTTCTAGCATGTAATAAGGAGTGCTAGAAGATGGAAAGAGCGAGATTGGATTTAAGAGTTCACCCTTCTGGATCTACACCATCAGAGGAATCAGCTTTGGATTTAGAAAGAAACTACTGTAATCATCAATATATTCCTTCCAGAAGCTCTTCACCATTGCAAGCTTTTGCAACAGGTGGTCAGCTTTCTGAGACTAGTGCTGCCT…
LOC108203470	GTAGTATCATTCTTCCTAATTATAGTAGTCTTCTTTCTATTCACATTCTCTCTCTCTATTCAATAATAGTACTATCTTGATTTTGTTCCAATTGTTCACAAGAACTTGCATCTGCAAAATCACATCTTTTATGGAAATCTTGAAGACTCTTTCTTGATAACCATCACTCCATAGCTCCACCATTGATGAAAGGAGTTCTAGCATGTAATAAGGAGTGCTAGAAGATGGAAAGAGCGAGATTGGATTTAAGAGTTCACCCTTCTGGATCTACACCATCAGAGGAATCAGCTTTGGATTTAGAAAGAAACTACTGTAATCATCAATATATTCCTTCCAGAAGCTCTTCACCATTGCAAGCTTTTGCAACAGGTGGTCAGCTTTCTGAGACTAGTGCTGCCT…
LOC108214057	GATCAACTTAAAACATACTCAGGTAAGTTGTAGTGATGATTTTGCCCATTAATCAACTTGATAGTACAACAAGCTAGGCAGCTACCGCCTACCGGCCAGTAGTAGTCGTTTTATTACATAAGTTCCATGCATATGTTAATCAACTACCTAACAACCATCTAAACATAGAATTTGATTCGCAGTTGTTAAGCAGAGTATTTATTTTTGTCGGTGGTTCAATTAGGAGGAAGAGGTAATGTGGACGCCCTTGAGGAGCAGACCCTTCCAGGTATCACCAGAAACACCAGAGAATTTGAATTTGATGTCTCCATATGGAAATTTGTTCTCGAATTTCCCAACTGATACTTCTTGCCAGACAAGTGGATTCACTGTTATATCTACTGTATTCTCTTGTTTCTT…
LOC108214057	GATCAACTTAAAACATACTCAGGTAAGTTGTAGTGATGATTTTGCCCATTAATCAACTTGATAGTACAACAAGCTAGGCAGCTACCGCCTACCGGCCAGTAGTAGTCGTTTTATTACATAAGTTCCATGCATATGTTAATCAACTACCTAACAACCATCTAAACATAGAATTTGATTCGCAGTTGTTAAGCAGAGTATTTATTTTTGTCGGTGGTTCAATTAGGAGGAAGAGGTAATGTGGACGCCCTTGAGGAGCAGACCCTTCCAGGTATCACCAGAAACACCAGAGAATTTGAATTTGATGTCTCCTCTTGGATACACGTTCAGGAAATTCCCAACAGATACTTCTTCCCAGACAAGTGGAACTACTACAATTTTTTCTGTCTTCTCTTCTTTCTT…
LOC108214057	TTAGATCAACTTAAAACATACTCAGGTAAGTTGTAGTGATGATTTTGCCCATTAATCAACTTGATAGTACAACAAGCTAGGCAGCTACCGCCTACCGGCCAGTAGTAGTCGTTTTATTACATAAGTTCCATGCATATGTTAATCAACTACCTAACAACCATCTAAACATAGAATTTGATTCGCAGTTGTTAAGCAGAGTATTTATTTTTGTCGGTGGTTCAATTAGGAGGAAGAGGTAATGTGGACGCCCTTGAGGAGCAGACCCCTCCAGGTATCACCAGAAACACCAGAGAATTTGAATTTGATGTCTCCATATGGAAATTTGTTCTCGAATTTCCCAACTGATACTTCTTGCCAGACAAGTGGATTCACTGTTATATCTACTGTATTCTCTTGTTT…
LOC108214057	TGGCTAGCGGTGCTATAAATAGCGCCACTACAAGAAAGTTTACCGCAAGGCAGAACCAAATACATACACAGATAGTTATAAGATGGCTCAAGCAGTGAAGATTGATGCGGCACAGGCTATGAAAATGGGAAATAAACTCCCTCATGTTGTTGGCTCAGAGGAGAAGACGAAAGTTGTGCCTGCTAACAAGCTCGATTATGCAGACCCTCAAGCATGGAAATTCTATCGTGATACTGCTGAATTTGTGGGAGGAAGCGATCCCACGGTCCAGGGAGTTTATGGTGTGGAAGAACTAGACTCAGGAAAGACGTACGAGGTGTCGTTTTATGTGTCTGTGATGAACCTTCCGGTGTCAAATCCTGTGACACTTACCTTGGAGCTTCCAAACCGGAAGAAACA…
LOC108212913	GATTTGGATTAATCTGGCCAGCGGTGCTATAAATAGGACACACTACATGAAAGTTTACCACAAGGCACAGAATTCCAAATACTTACATATTTAGTTATAAGATGGCTCAAGTAGCAAGGACTGATGCGGCACAGGCTATGAAAATGGGAAAAGAACTCCCTCATGTTGCTGGCTCAGAGGGGAAGACGCAAGTTGTGCCTTCTAAGGAGCTCCATTACGCAGACCTTCAAGCATGGAAATTCAATGATGACACTGCTGAATTTCTGGGAGGAAGCGATCCCACAGTCGACGGAACTTACAGTGTGAAAAATCTTGAATTGGGAAAGATGTACGAGGTGTCTTTTTATATGTCCATAAAAAACCTTCCAGTGTCAAATCAAGTGACACTTACCTTGGAGC…
LOC108205263	TTCTACTCCGTATATGATAGACGTGGATGAAGGTCAAAGAGGCCAAGTACAAGATAACGATAATTGAGTGCATGGCGTCACTTTCACATCTCCATGTTCCTCACATTCTCACCACCCGCTTATCTACTGTCCAGAAAAAACAAGTCTACGCAGCAGCTTCTTCTGTTGAATCCAACTCAAGAAGAGCTCTCCTTTTCTCATCTGTATCCACTGCATTATCACTACTAATATGTTCTGAATCTACTGCCCTCGCTAGACCCACCACCATTTCTGACTTTTTCGAGCTTCCGGATTCTGGCGGCGTCAAGGCTTTGGATCTTCGCGTTGCTCAAGGTGAACTTCCCGTTGACGGTGATCAGGTTGCAATTCATTACTATGGAAGGTTGGCAGCAAAGCAAG…
LOC108204578	GCTAACCACGGTGACAACACAATAATCGTCATCCAAACAACTTCATTTCTTTATCCAAACGACGACTTTCACACTTTCTCTCTCCCCCTTTTCTTAGAATACACTTGCTCTTCTCCCACGAAGCTTCCCCTTTTCTCACCTCTTCAAACGGAAATTCCCCTTCAATTTCAATCCACTCTGTTGTTTACTCGCTCTTAATCATTCTTCTGTCAACTGGGTTTTCAAGATTTTGAGGAAAGATTCAATCTTTATCTTTGATTCTCTTTTTTCTTGACTGTTCAAGTTGCTAAACACACACACACATATTGGGGTTTAGTCACTCTAAATCTTTCTTTTCCCACCTGGGTATTGAAGATTTTGTTGAAAGATTCAATCTTTATGCTGTGATTTTTATCTATT…
LOC108216851	TACAAACAGTACACATATCTTTACACAATCGTCGATAAAAGTTCGGTAGGATATACTTTTCTTTGCCTCAGCCTTTACGACGACCCTTTCATCTCTTCTGCATCTCCTTTTTCATCACGCCCTTCTCTTGTTTTCCTTTTCTTCATCGCCGATTTTATACTCATGGCCACGGCAGGGAACAAGAATATCAACGCCAAATTGGTCCTTCTTGGGGATGTTGGTGCTGGAAAATCAAGTCTGGTTTTGCGTTTTGTCAAAGGGCAATTTGTCGAATTTCAGGAATCCACAATAGGTGCTGCCTTCTTCTCACAAACAGTGGCTGTAAATGACGCAACTGTAAATTTTGAAATTTGGGACACTGCCGGTCAACACCGATATCATAGCTTAGCTCCAATGTAC…
LOC108204973	TTCAAACCCGGTACCATCTCTTAAACAAAACGCCCCCTTAAACTTTCTGCGAGTAAAACCCCTTATTTCTCAAGCTTCCTATTCCCCCAACTTGGGGACCATTTTGCTGCTTTTTGCTATTCGTATACTGGAAGATTCAAGACTTGGGGAGGAATGGGTGCATCGAGGTTCTAATCTGCTTCCGTGAGTTTAATTTGAATAAAGATGTGTTCTATGTAGTTTATTGTGTTTACTTCTTCCCCGGAATGATGATGCTTGTTTATCTGTATAAACGTCAATCCAAAACCTCTAATGTCAAGCACGAAACTTTCCACAACTTGAATCAGTGTCTTTTGGGACCCATCATTCGGTGTTATAGAACCAAAAAAATCATCTCCGCTGCAGATCAAACTGCATTTA…
LOC108204973	TTCAAACCCGGTACCATCTCTTAAACAAAACGCCCCCTTAAACTTTCTGCGAGTAAAACCCCTTATTTCTCAAGCTTCCTATTCCCCCAACTTGGGGACCATTTTGCTGCTTTTTGCTATTCGTATACTGGAAGATTCAAGACTTGGGGAGGAATGGGTGCATCGAGGTTCTAATCTGCTTCCGTGAGTTTAATTTGAATAAAGATGTGTTCTATGTAGTTTATTGTGTTTACTTCTTCCCCGGAATGATGATGCTTGTTTATCTGTATAAACGTCAATCCAAAACCTCTAATGTCAAGCACGAAACTTTCCACAACTTGAATCAGTGTCTTTTGGGACCCATCATTCGGTGTTATAGAACCAAAAAAATCATCTCCGCTGCAGATCAAACTGCATTTA…
LOC108204973	TTCAAACCCGGTACCATCTCTTAAACAAAACGCCCCCTTAAACTTTCTGCGAGTAAAACCCCTTATTTCTCAAGCTTCCTATTCCCCCAACTTGGGGACCATTTTGCTGCTTTTTGCTATTCGTATACTGGAAGATTCAAGACTTGGGGAGGAATGGGTGCATCGAGGTTCTAATCTGCTTCCGTGAGTTTAATTTGAATAAAGATGTGTTCTATGTAGTTTATTGTGTTTACTTCTTCCCCGGAATGATGATGCTTGTTTATCTGTATAAACGTCAATCCAAAACCTCTAATGTCAAGCACGAAACTTTCCACAACTTGAATCAGTGTCTTTTGGGACCCATCATTCGGTGTTATAGAACCAAAAAAATCATCTCCGCTGCAGATCAAACTGCATTTA…
LOC108212387	TTTTGCAACCGGTCAGTACCTTTTTCACCTTTTTCTTTGAATTCAAATTTCAGAAGCTTTACTTTTTCTTCCAAAACTGCGTATTCTCCTCCTCCAGTCTCTTGCTTCCATCGGCGATCCAGACTTCGGAAACTCCGGGAGATGATGAGTCGTATCATGGTTGGAGGATTGATAAATTTGATTTCGAATCGCCTGTTGTGTCCGGTACCCCTGTCAAGGCACTCAAAGTCGACCGGACCGGACTCGCTGCCGCCTGTGGTCAGTGCTCAAGCAGTATGCCGTGTAGAACTCCTCTAGCTGATGTTTCTAATAAGCCTTTCTTGGGTGGTAGGCAGCAACGGCACTCCCTCCTCAGAAGTTGTCTCTACAGTCGGGTCATATTTTATCAGGCGAGAACTT…
LOC108212387	TTTTGCAACCGGTCAGTACCTTTTTCACCTTTTTCTTTGAATTCAAATTTCAGAAGCTTTACTTTTTCTTCCAAAACTGCGTATTCTCCTCCTCCAGTCTCTTGCTTCCATCGGCGATCCAGGTTATTTCATCTTCTTTTAGTTGCTTCTCCGACGAACTCAGTTTCTCATGGAGCGGACTTCGGAAACTCCGGGAGATGATGAGTCGTATCATGGTTGGAGGATTGATAAATTTGATTTCGAATCGCCTGTTGTGTCCGGTACCCCTGTCAAGGCACTCAAAGTCGACCGGACCGGACTCGCTGCCGCCTGTGGTCAGTGCTCAAGCAGTATGCCGTGTAGAACTCCTCTAGCTGATGTTTCTAATAAGCCTTTCTTGGGTGGTAGGCAGCAACGGCA…
LOC108212387	TTTTGCAACCGGTCAGTACCTTTTTCACCTTTTTCTTTGAATTCAAATTTCAGAAGCTTTACTTTTTCTTCCAAAACTGCGTATTCTCCTCCTCCAGTCTCTTGCTTCCATCGGCGATCCAGGTTATTTCATCTTCTTTTAGTTGCTTCTCCGACGAACTCAGTTTCTCATGGAGCGGACTTCGGAAACTCCGGGAGATGATGAGTCGTATCATGGTTGGAGGATTGATAAATTTGATTTCGAATCGCCTGTTGTGTCCGGTACCCCTGTCAAGGCACTCAAAGTCGACCGGACCGGACTCGCTGCCGCCTGTGGTCAGTGCTCAAGCAGTATGCCGTGTAGAACTCCTCTAGCTGATGTTTCTAATAAGCCTTTCTTGGGTGGTAGGCAGCAACGGCA…
[truncated: 9,021 more rows]

## Sheet: w.1.2 - S4
Gene ID	Biotype	Chromosome	Start	End	Strand	Description	log2FoldChange	Fold change	Adjusted p-value	FDR≤
[truncated: 3,525 more rows]

## Sheet: w.1.3 - S5
Gene ID	Biotype	Chromosome	Start	End	Strand	Description	log2FoldChange	Fold change	Adjusted p-value	FDR≤
[truncated: 3,667 more rows]

[truncated: 16 more sheets: w.2.3 - S6, c.1.2 - S7, c.1.3 - S8, c.2.3 - S9, c_w.DEP - S10, c_w.1.2 - S11, c_w.1.3 - S12, c_w.2.3 - S13, cDEG.1.2 - S14, cDEG.1.3 - S15, cDEG.2.3 - S16, wDEG.1.2 - S17, wDEG.1.3 - S18, wDEG.2.3 - S19, Enrichment - S20, Association - S21]
