# Supplementary material for: Comparative Transcriptomics of Root Development in Wild and Cultivated Carrots
Source: Genes (Basel). 2018 Aug 24;9(9):431. doi: 10.3390/genes9090431 (PMC6162504; doi:10.3390/genes9090431)
Supplement: Supplementary file 1 [file genes-09-00431-s001.zip › Supplementary tables S22-S26.xlsx]

## Sheet: Content
Suppl. Table	Dataset description	Dataset name
S22	DEGs between wild and cultivated carrot - T1	wcDEG.1
S23	DEGs between wild and cultivated carrot - T2	wcDEG.2
S24	DEGs between wild and cultivated carrot - T3	wcDEG.3
S25	Enrichment results	Enrichment (wild vs. cult)
S26	Association results	Association (wild vs. cult)

## Sheet: wcDEG.1 - S22
Cluster ID	Gene ID	Description	log2FoldChange	FDR≤	TPM
					Cultivated			Wild
					T1-2874B-1	T1-2874B-2	T1-2874B-3	T1-Dc615-1	T1-Dc615-2	T1-Dc615-3
1	LOC108200128	flavin-dependent oxidoreductase FOX2-like	2.14575	0.001	185.09	144.519	184.938	33.629	46.234	53.559
	LOC108197652	14 kDa proline-rich protein DC2.15-like	1.77958	0.001	154.51	251.725	157.054	43.071	47.219	99.372
	LOC108211283	cysteine proteinase inhibitor B	1.56342	0.01	145.111	166.962	183.489	40.808	68.208	100.776
	LOC108201108	basic blue protein	1.54009	0.01	139.211	148.355	164.644	17.987	75.48	70.051
	LOC108210653	auxin-responsive protein IAA16-like	1.53646	0.01	139.822	214.572	144.38	83.611	54.3	61.412
	LOC108219960	uncharacterized LOC108219960	1.29364	0.05	161.974	93.773	191.08	69.599	61.454	87.35
	LOC108211512	protein LHCP TRANSLOCATION DEFECT	1.27607	0.05	152.309	176.291	119.136	96.834	51.891	73.57
	LOC108194119	major allergen Api g 1, isoallergen 1-like	1.21986	0.05	97.004	96.602	187.379	26.549	90.666	63.864
	LOC108202811	expansin-A1-like	1.19104	0.05	148.324	178.256	187.125	130.976	69.273	63.46
	LOC108225585	uncharacterized LOC108225585	1.18713	0.05	253.651	128.281	140.85	52.369	110.609	111.799
	LOC108197442	transmembrane protein 258-like	1.17764	0.05	110.533	158.041	161.584	69.116	77.65	93.868
	LOC108210194	protein CURVATURE THYLAKOID 1A, chloroplastic-like	1.17503	0.05	190.531	134.839	111.705	71.472	95.244	66.762
	LOC108207017	uncharacterized LOC108207017	1.14693	0.05	145.199	172.604	190.521	53.642	104.859	117.377
	LOC108224909	glutaredoxin-like	1.06736	0.05	172.166	131.801	113.786	88.78	65.892	97.567
2	XLOC_028454		2.68712	0.001	35.22	24.678	55.942	2.891	6.764	8.747
	XLOC_010939		2.57233	0.001	39.462	51.846	62.905	11.758	5.324	5.521
	LOC108211856	peamaclein	2.52289	0.001	41.486	45.986	49.444	6.398	10.98	4.789
	LOC108220144	CASP-like protein F16	2.44072	0.001	18.502	24.433	33.508	5.674	3.762	4.588
	LOC108220770	protein GLUTAMINE DUMPER 2-like	2.32945	0.001	27.112	26.057	27.162	6.552	4.391	5.398
	LOC108225299	uncharacterized LOC108225299	2.2826	0.001	33.861	54.642	44.874	10.903	9.85	8.185
	LOC108199484	non-functional NADPH-dependent codeinone reductase 2-like	2.26986	0.001	43.755	63.429	43.905	12.269	12.041	16.648
	LOC108204736	cysteine-rich repeat secretory protein 55	2.20672	0.001	37.026	22.131	66.176	12.148	5.181	6.989
	LOC108216766	pathogen-related protein-like	2.05695	0.001	23.9	18.031	40.872	6.78	7.711	5.145
	LOC108210571	FAD-dependent urate hydroxylase-like	2.02265	0.001	24.832	44.615	64.272	11.227	13.315	3.69
	LOC108206906	glutathione S-transferase U17-like	1.989	0.01	37.081	35.249	90.45	9.105	16.558	14.588
	LOC108222801	photosystem II reaction center W protein, chloroplastic-like	1.92968	0.01	18.18	38.706	70.414	11.729	9.99	10.948
	LOC108211516	17.3 kDa class I heat shock protein-like	1.92803	0.001	19.621	45.003	33.655	1.988	10.297	10.511
	LOC108200862	translationally-controlled tumor protein homolog	1.8854	0.001	81.236	42.119	70.999	17.218	22.003	16.95
	LOC108224861	uncharacterized LOC108224861	1.76697	0.001	32.082	42.685	34.608	12.592	11.465	13.041
	LOC108206996	aspartyl protease family protein At5g10770-like	1.74254	0.01	26.964	39.498	36.037	7.312	16.807	3.177
	LOC108202085	dirigent protein 21-like	1.64633	0.05	20.828	27.679	38.062	14.479	4.427	0.931
	LOC108195181	protein HEADING DATE 3A-like	1.63997	0.05	47.131	49.306	43.228	23.791	8.223	1.416
	LOC108205188	BURP domain-containing protein 3-like	1.58839	0.05	73.435	19.266	37.206	11.426	21.064	7.485
	LOC108215101	glycerophosphodiester phosphodiesterase GDPD6-like	1.55334	0.001	42.021	37.415	37.153	53.505	73.281	44.403
	LOC108210811	uncharacterized oxidoreductase SSP0419-like	1.53002	0.01	21.524	30.355	22.125	8.87	5.198	15.485
	XLOC_016657		1.52457	0.01	35.81	34.988	43.325	12.236	17.462	16.716
	LOC108197466	GDSL esterase/lipase At5g45670-like	1.52141	0.001	40.191	23.587	29.85	9.173	12.906	16.036
	LOC108210859	MKI67 FHA domain-interacting nucleolar phosphoprotein-like	1.50812	0.01	44.353	25.805	47.897	22.623	7.05	14.742
	LOC108224784	protein NRT1/ PTR FAMILY 2.11	1.498	0.05	14.546	36.167	18.644	5.915	9.364	12.282
	LOC108227542	uncharacterized LOC108227542	1.49076	0.01	40.242	56.461	65.973	31.692	14.027	19.291
	LOC108198377	probable transcriptional regulator RABBIT EARS	1.48024	0.05	38.429	22.289	16.189	9.16	6.057	13.933
	LOC108206774	DNA-directed RNA polymerases I and III subunit RPAC2-like	1.475	0.01	23.166	23.552	28.46	9.592	6.83	13.609
	LOC108192423	profilin-like	1.46171	0.01	62.106	48.191	40.1	9.747	24.449	27.402
	LOC108210998	NEP1-interacting protein-like 1	1.42773	0.01	24.283	34.441	45.625	14.84	11.244	19.704
	LOC108193823	uncharacterized LOC108193823	1.42197	0.01	44.719	28.171	35.47	16.42	8.396	21.906
	LOC108224600	chorismate mutase 2	1.40847	0.01	32.644	41.395	32.665	10.406	14.611	22.993
	LOC108213112	probable beta-D-xylosidase 7	1.39851	0.05	24.482	20.315	36.92	15.598	11.808	4.197
	LOC108211126	peroxiredoxin Q, chloroplastic-like	1.37615	0.01	23.559	27.948	28.961	15.126	11.218	8.474
	LOC108220220	calmodulin-like protein 7	1.36887	0.01	34.277	38.309	39.096	15.212	17.631	18.668
	LOC108195917	methylesterase 10-like	1.36357	0.01	46.464	38.14	43.63	10.88	27.452	18.656
	LOC108206291	protein NRT1/ PTR FAMILY 2.6-like	1.33998	0.05	8.987	24.813	36.01	10.873	8.608	10.257
	LOC108207834	glycine-rich cell wall structural protein 1.0	1.33142	0.05	44.808	25.093	12.04	12.922	13.696	4.427
	LOC108206754	uncharacterized LOC108206754	1.31112	0.05	26.742	21.771	33.599	11.77	14.875	12.642
	LOC108210226	glutamate--glyoxylate aminotransferase 2	1.29983	0.01	46.449	39.181	34.2	14.229	19.817	24.819
	LOC108216301	signal peptidase complex catalytic subunit SEC11A-like	1.27768	0.01	32.708	39.971	31.006	19.593	14.149	17.657
	LOC108193676	dirigent protein 22-like	1.26656	0.05	30.608	22.301	52.339	9.57	23.056	14.685
	LOC108199463	gibberellin-regulated protein 9-like	1.24348	0.05	54.692	46.339	42.928	32.791	11.57	26.019
	LOC108203169	stress-response A/B barrel domain-containing protein HS1-like	1.23805	0.05	44.418	28.019	31.012	14.724	18.898	18.783
	LOC108206060	protein SRG1-like	1.22944	0.05	55.449	47.4	32.599	13.802	29.732	23.087
	LOC108196653	endochitinase EP3	1.22249	0.05	19.876	46.992	28.644	16.941	9.521	22.148
	LOC108211052	actin-depolymerizing factor	1.22062	0.05	23.702	33.379	62.679	26.93	13.079	16.735
	LOC108204892	serpin-ZX-like	1.21554	0.05	25.091	21.16	18.578	9.047	6.2	15.612
	LOC108227680	uncharacterized LOC108227680	1.21426	0.05	13.264	23.146	27.468	8.761	7.249	15.86
	LOC108219547	low-temperature-induced cysteine proteinase-like	1.21123	0.05	22.593	31.07	14.593	13.217	11.396	9.879
	LOC108225273	HVA22-like protein e	1.1927	0.05	36.741	61.326	59.943	24.975	17.855	41.385
	LOC108228078	protein STRICTOSIDINE SYNTHASE-LIKE 3	1.17405	0.05	20.495	38.834	30.29	10.541	11.361	24.83
	LOC108225795	protein disulfide-isomerase SCO2	1.15278	0.05	41.414	23.483	34.485	25.297	9.331	16.749
	LOC108223975	xyloglucan galactosyltransferase XLT2	1.14001	0.05	19.783	29.121	17.428	9.019	11.319	16.435
	LOC108215991	D-amino-acid transaminase, chloroplastic-like	1.13829	0.05	33.985	27.444	27.742	10.967	21.23	15.8
	LOC108219977	11S globulin subunit beta-like	1.10292	0.05	48.063	31.968	63.663	30.417	23.384	26.009
	LOC108224375	protein STRICTOSIDINE SYNTHASE-LIKE 10-like	1.08332	0.05	33.704	42.263	57.379	14.223	25.876	36.331
	LOC108222631	uncharacterized LOC108222631	1.07867	0.05	27.458	27.294	42.988	15.154	13.499	28.546
	LOC108200426	putative UDP-glucose glucosyltransferase	-1.09059	0.05	13.916	21.971	22.986	53.695	67.507	66.58
	LOC108193281	cytochrome P450 CYP71D313-like	-1.15352	0.05	31.776	24.078	20.811	77.964	80.403	98.893
	LOC108193516	stress-associated endoplasmic reticulum protein 2-like	-1.18294	0.05	15.302	13.409	21.127	60.786	35.061	92.805
	LOC108197250	F-box/kelch-repeat protein At3g23880-like	-1.22644	0.05	19.241	23.68	35.912	120.263	64.569	102.274
3	LOC108205071	probable aquaporin PIP1-4	3.18987	0.001	979.778	972.1	1084.96	135.253	145.818	114.382
	LOC108197341	chlorophyll a-b binding protein, chloroplastic-like	2.41657	0.001	818.456	786.194	754.49	181.467	96.102	26.604
	LOC108209961	chlorophyll a-b binding protein, chloroplastic-like	2.20113	0.001	1474.9	2363.05	1461.72	512.087	302.521	78.035
	LOC108216768	gibberellin-regulated protein 11-like	1.914	0.001	394.016	1116.96	704.824	143.296	265.602	191.647
	LOC108209739	photosystem I reaction center subunit III, chloroplastic	1.75515	0.001	991.753	1245.13	1054.51	411.343	411.805	251.678
	LOC108208469	transcription factor FER-LIKE IRON DEFICIENCY-INDUCED TRANSCRIPTION FACTOR-like	1.37154	0.01	998.899	1179.88	1101.13	518.503	639.345	372.705
	LOC108206840	calvin cycle protein CP12-2, chloroplastic-like	1.23251	0.05	910.939	1151.71	835.121	703.853	351.264	375.557
	LOC108209094	aquaporin TIP2-1	1.20332	0.05	1200.11	1258.17	1428.06	844.277	539.301	725.691
	LOC108209277	cysteine synthase-like	1.11423	0.05	595.769	641.772	1146.97	608.131	248.335	240.831
4	LOC108197787	kirola-like	1.95262	0.001	541.742	740.442	407.324	189.193	210.566	77.988
	LOC108213519	glutaredoxin-C13-like	1.85354	0.001	465.315	442.019	632.79	221.657	124.571	139.486
	LOC108211045	60S ribosomal protein L9-1-like	1.48786	0.01	291.081	336.499	415.294	109.496	124.519	229.927
	LOC108194087	hydrophobic protein RCI2A-like	1.41175	0.05	273.661	576.704	273.814	82.828	182.513	204.114
	LOC108216050	uncharacterized LOC108216050	1.19369	0.05	237.08	471.006	308.797	177.203	155.656	223.295
	LOC108197070	protein TIFY 10A-like	1.19181	0.05	405.662	505.468	393.182	253.16	168.056	303.551
	LOC108197402	acyl carrier protein 1, chloroplastic-like	1.0649	0.05	328.614	415.964	418.161	255.054	221.332	219.797
5	LOC108211704	trans-anol O-methyltransferase 1-like	4.16779	0.001	57.234	74.459	123.596	2.986	2.975	5.219
	LOC108225292	uncharacterized LOC108225292	3.26159	0.001	106.646	134.54	117.323	16.82	9.283	11.38
	LOC108197279	epidermis-specific secreted glycoprotein EP1-like	2.87118	0.001	55.276	99.222	149.276	14.523	13.207	9.425
	LOC108214501	trans-anol O-methyltransferase 1-like	1.78414	0.05	62.418	145.962	161.144	6.321	58.277	11.458
6	LOC108221054	glycine-rich protein DC7.1-like	7.37038	0.001	2272.85	2659.45	4356.43	6.252	8.757	2.435
	LOC108193402	chlorophyll a-b binding protein, chloroplastic-like	3.84276	0.001	3422.49	4517.34	991.031	140.93	150.895	113.426
	LOC108208992	ribulose bisphosphate carboxylase small chain 1B, chloroplastic-like	2.50338	0.001	3836.41	3073.2	1932.33	675.325	328.95	621.863
	LOC108205957	chlorophyll a-b binding protein, chloroplastic-like	2.28398	0.001	3320.08	4038.45	2458.03	843.824	448.152	81.556
	XLOC_009094	0	1.80076	0.001	4677.28	3485.62	3368.23	1946.41	1067.79	933.57
	LOC108208530	ribulose bisphosphate carboxylase small chain 1B, chloroplastic-like	1.6148	0.01	6317.97	5502.91	4831.88	2397.89	2333.07	1102.54
	LOC108211252	photosystem I subunit O	1.25563	0.05	2013.99	2678.52	2523.22	1935.35	823.906	589.899
	LOC108202752	photosystem II 5 kDa protein, chloroplastic	1.1697	0.05	2529.37	3395.18	3157.58	1747.25	2010.3	1465.13
7	LOC108209058	36.4 kDa proline-rich protein-like	-1.07808	0.05	124.879	117.675	161.621	354.988	378.242	582.755
	LOC108209137	V-type proton ATPase subunit E-like	-1.09197	0.05	29.018	46.008	30.423	79.96	127.101	137.354
	LOC108196868	uncharacterized LOC108196868	-1.16565	0.05	42.377	27.609	34.033	162.783	70.186	132.77
	LOC108213558	glutaredoxin-C13-like	-1.29619	0.01	75.394	75.62	83.802	385.311	184.755	329.362
	LOC108222262	protein RADIALIS-like 3	-1.32569	0.01	28.212	45.553	39.585	178.663	113.13	158.944
	LOC108200598	peptidyl-prolyl cis-trans isomerase 1-like	-1.41457	0.01	28.662	40.544	14.087	90.029	144.33	133.384
	LOC108196905	hypersensitive-induced response protein 1	-1.42892	0.01	37.572	52.304	37.212	163.2	143.425	218.894
	LOC108210240	protein BPS1, chloroplastic	-1.4395	0.01	17.36	32.923	28.23	91.509	96.841	154.377
	LOC108205617	metallothionein-like protein 1	-1.5273	0.001	38.985	62.321	46.91	99.203	345.316	287.473
	LOC108221993	histone H4	-1.62958	0.001	60.803	36.22	53.775	304.867	207.837	271.459
	LOC108224387	glycine-rich RNA-binding protein 10	-1.65928	0.001	32.606	60.808	53.557	214.802	221.171	289.086
	LOC108205147	uncharacterized LOC108205147	-1.95213	0.001	27.906	34.191	7.201	105.398	131.694	104.034
	LOC108228137	hypersensitive-induced response protein 1-like	-2.36072	0.01	8.131	12.862	18.343	150.288	124.594	93.323
	LOC108205198	eukaryotic initiation factor 4A-15-like	-3.09965	0.001	2.656	4.152	6.117	138.972	312.061	213.308
	LOC108225758	uncharacterized LOC108225758	-4.51692	0.001	2.56	2.481	1.109	249.913	291.901	65.254
8	LOC108211211	putative methyltransferase DDB_G0268948	2.26193	0.001	79.697	76.45	99.373	15.609	20.204	24.64
	LOC108228023	glutamate-1-semialdehyde 2,1-aminomutase, chloroplastic	1.70515	0.001	66.256	93.838	89.452	32.792	29.791	24.123
	LOC108215173	STS14 protein	1.69771	0.001	69.554	121.263	86.917	20.407	17.259	56.77
	LOC108204519	lysophospholipid acyltransferase 1-like	1.43409	0.01	77.316	79.876	75.867	45.12	22.372	35.638
	LOC108197462	uncharacterized LOC108197462	1.35639	0.01	73.588	91.867	80.379	32.356	45.573	40.637
	LOC108208659	histone H2B.3-like	1.31203	0.01	55.269	53.113	88.838	25.197	19.327	49.824
	LOC108198805	non-specific lipid-transfer protein	1.31106	0.01	92.964	111.674	50.383	34.156	46.97	41.224
	LOC108213070	uncharacterized LOC108213070	1.23592	0.05	45.452	75.318	98.162	19.201	45.655	41.362
	LOC108224984	uncharacterized LOC108224984	1.20161	0.05	37.096	71.376	94.592	37.504	27.055	56.986
	LOC108219750	thioredoxin reductase 1	1.13842	0.05	52.205	99.144	71.097	44.395	34.011	44.955
	LOC108224991	prefoldin subunit 1	1.13441	0.05	80.783	61.427	116.638	24.536	58.633	56.3
	LOC108223791	superoxide dismutase [Mn], mitochondrial-like	1.12072	0.05	80.019	89.867	81.354	51.921	24.583	66.315
	LOC108206838	uncharacterized LOC108206838	1.11254	0.05	84.613	88.89	61.353	45.828	51.374	30.493
	LOC108227573	glutaredoxin-C4	1.08274	0.05	85.573	54.082	59.623	41.171	41.197	31.268
	LOC108197849	uncharacterized LOC108197849	1.02205	0.05	70.612	73.429	81.512	53.122	38.873	47.049
9	LOC108203001	glyceraldehyde-3-phosphate dehydrogenase GAPC1, cytosolic	3.31154	0.001	20.613	159.078	42.286	4.616	2.326	4.878
10	LOC108210693	proteasome subunit alpha type-7	1.51973	0.01	105.258	157.314	106.882	36.335	56.415	57.193
	LOC108225326	pathogenesis-related protein PR-1-like	1.49882	0.01	124.146	127.417	66.936	29.907	51.445	47.23
	LOC108219932	temperature-induced lipocalin-1-like	1.46093	0.01	121.158	203.091	99.891	52.37	60.884	65.756
	LOC108210830	sec-independent protein translocase protein TATA, chloroplastic-like	1.39152	0.01	79.301	97.55	111.956	59.059	27.887	42.734
	LOC108220701	peptidyl-prolyl cis-trans isomerase FKBP16-4, chloroplastic	1.334	0.01	87.454	106.572	104.192	50.334	42.317	53.13
	LOC108192745	uncharacterized LOC108192745	1.31155	0.01	99.101	112.663	90.127	56.244	41.912	50.214
	LOC108227365	DNA-damage-repair/toleration protein DRT100	1.30146	0.05	70.737	133.353	80.817	47.851	49.306	37.73
	LOC108195983	light-regulated protein	1.22383	0.05	152.062	126.452	136.848	96.207	65.83	52.514
	LOC108220066	uncharacterized LOC108220066	1.18387	0.05	62.858	128.876	98.787	67.039	38.156	46.333
	LOC108219505	nascent polypeptide-associated complex subunit beta-like	1.18112	0.05	78.7	113.689	119.582	55.709	50.608	56.369
	LOC108210784	uncharacterized LOC108210784	1.14651	0.05	129.223	99.013	94.797	59.097	64.352	55.147
	LOC108206115	cytochrome b5-like	1.06474	0.05	120.952	96.561	125.76	55.244	69.41	79.369
	LOC108204625	50S ribosomal protein L28, chloroplastic	1.01818	0.05	84.368	109.526	91.685	76.759	35.822	65.559
11	LOC108205454	serpin-ZX-like	3.03727	0.001	9.194	14.852	15.662	0.983	1.903	1.185
	LOC108209872	UDP-glucose iridoid glucosyltransferase-like	2.78469	0.001	22.683	18.495	16.526	2.954	2.496	0.739
	LOC108222823	elongation factor 1-alpha-like	2.77551	0.001	15.891	15.273	22.393	3.006	1.425	3.271
	LOC108215152	O-acyltransferase WSD1-like	2.36682	0.001	11.805	22.319	11.595	2.405	3.601	2.393
	LOC108221157	glutamyl-tRNA(Gln) amidotransferase subunit A-like	2.34632	0.001	9.054	6.893	9.565	1.955	1.333	1.837
	LOC108227484	structural maintenance of chromosomes protein 2-1	2.31223	0.001	9.931	9.555	10.7	2.196	2.507	1.249
	LOC108206837	geraniol 8-hydroxylase-like	2.27884	0.001	13.947	7.941	8.703	1.817	2.675	1.393
	LOC108205119	FAD-dependent urate hydroxylase-like	2.25222	0.001	10.625	10.971	6.218	1.48	2.585	0.735
	LOC108215416	acidic endochitinase-like	2.22949	0.001	11.757	17.022	15.256	4.497	1.883	2.179
	XLOC_038077		2.22419	0.001	9.605	8.669	12.801	2.641	2.204	1.688
	LOC108195352	glutathione S-transferase U8	2.21348	0.05	13.526	1.64	22.525	1.377	1.841	1.314
	LOC108193476	uncharacterized LOC108193476	2.13708	0.001	9.392	9.283	8.71	2.155	2.448	1.561
	LOC108210072	germin-like protein subfamily 3 member 2	2.12032	0.001	11.926	15.461	20.111	1.289	4.308	4.595
	LOC108224335	17.4 kDa class III heat shock protein	2.07831	0.001	14.221	22.179	26.969	4.733	5.913	4.379
	LOC108225144	alcohol dehydrogenase-like	2.05516	0.001	21.55	25.437	17.614	8.345	3.154	3.815
	LOC108192392	F-box protein SKIP19-like	2.01907	0.001	7.235	4.118	7.413	1.06	1.74	1.625
	LOC108197342	flavonol synthase/flavanone 3-hydroxylase-like	2.00276	0.001	15.086	10.411	15.642	4.099	3.276	3.533
	LOC108224130	mitochondrial ubiquitin ligase activator of nfkb 1-like	1.97145	0.001	5.586	8.25	12.126	1.142	1.696	3.492
	LOC108216237	nicotinamide/nicotinic acid mononucleotide adenylyltransferase	1.95677	0.01	10.867	7.5	9.683	1.778	2.276	2.962
	LOC108200580	high affinity nitrate transporter 2.5-like	1.88679	0.001	10.965	12.488	15.666	3.714	3.374	4.899
	LOC108224257	triacylglycerol lipase 2	1.88223	0.01	5.513	18.315	21.952	4.003	4.777	1.991
	LOC108198565	putative disease resistance RPP13-like protein 3	1.85978	0.001	7.978	4.39	4.933	2.1	0.897	1.748
	LOC108227495	DNA repair protein RAD16-like	1.81184	0.01	15.555	4.722	12.789	3.685	2.292	2.936
	LOC108216790	O-acyltransferase WSD1-like	1.79398	0.01	8.175	5.085	7.088	1.154	3.174	0.789
	LOC108227397	subtilisin-like protease SBT1.3	1.78915	0.001	9.699	16.181	8.81	4.04	2.869	4.221
	LOC108211654	thioredoxin-like protein CXXS1	1.77762	0.01	12.327	9.345	13.439	2.236	3.074	4.814
	LOC108228179	uncharacterized LOC108228179	1.76546	0.01	5.067	17.804	17.903	1.516	3.811	3.129
	LOC108225204	probable BOI-related E3 ubiquitin-protein ligase 3	1.75683	0.01	15.282	17.632	12.608	1.844	7.507	3.521
	LOC108214915	soyasapogenol B glucuronide galactosyltransferase-like	1.74525	0.01	11.305	10.859	6.792	1.217	3.254	4.451
	LOC108200222	selenoprotein H-like	1.7135	0.05	7.579	2.747	12.595	2.043	2.746	2.039
	LOC108217902	enoyl-CoA delta isomerase 1, peroxisomal-like	1.7113	0.01	22.346	10.494	12.149	4.948	4.514	4.732
	LOC108202500	glucan endo-1,3-beta-D-glucosidase	1.68548	0.01	15.048	5.779	16.453	2.039	5.179	4.122
	LOC108210952	cytokinin hydroxylase-like	1.6786	0.01	2.568	4.994	5.291	1.617	1.478	0.702
	LOC108209834	asparagine synthetase [glutamine-hydrolyzing]	1.67477	0.001	18.66	13.347	25.693	8.806	5.263	5.148
	LOC108213022	ectonucleotide pyrophosphatase/phosphodiesterase family member 1-like	1.66139	0.01	9.522	8.975	6.882	1.313	4.615	1.72
	LOC108214061	ATPase family AAA domain-containing protein 1-B-like	1.65856	0.01	16.6	10.523	9.482	5.999	2.16	3.761
	LOC108201936	acetylajmalan esterase-like	1.63781	0.01	5.581	8.006	9.215	3.829	1.621	1.44
	LOC108194479	cytochrome P450 CYP749A22-like	1.62456	0.01	9.089	8.941	13.923	4.368	2.599	4.45
	LOC108192368	probable pectinesterase/pectinesterase inhibitor 51	1.61842	0.01	4.292	7.125	3.589	1.172	1.053	2.716
	LOC108214322	alcohol dehydrogenase-like 7	1.60264	0.01	10.207	8.6	8.12	1.826	3.958	3.919
	LOC108197085	non-functional NADPH-dependent codeinone reductase 2-like	1.60182	0.05	28.999	9.803	26.087	2.234	9.288	8.969
	LOC108193333	methionine aminopeptidase 1B, chloroplastic-like	1.59092	0.01	16.801	13.015	14.317	5.345	6.854	3.782
	LOC108224469	aspartate-semialdehyde dehydrogenase-like	1.59002	0.01	5.747	7.165	5.166	1.187	1.492	3.759
	LOC108206427	lachrymatory-factor synthase	1.57824	0.01	13.137	13.106	8.998	3.558	3.692	5.568
	LOC108224820	cytochrome P450 71B9-like	1.57279	0.01	12.835	25.03	20.611	5.243	4.525	12.27
	LOC108219183	wall-associated receptor kinase 2-like	1.56289	0.05	21.06	8.848	11.239	4.587	3.342	7.413
	LOC108193572	uncharacterized LOC108193572	1.5371	0.01	5.492	4.488	3.955	2.373	0.685	2.485
	LOC108200383	nudix hydrolase 3-like	1.52075	0.05	5.772	3.016	4.862	1.783	2.07	0.825
	LOC108194323	uncharacterized LOC108194323	1.51672	0.05	6.61	9.029	6.407	3.134	2.454	2.327
	LOC108222983	magnesium transporter MRS2-I-like	1.50772	0.01	4.739	4.879	6.686	1.386	3.005	1.866
	LOC108226562	transcription repressor OFP13	1.50587	0.05	8.576	7.974	4.341	3.01	1.576	2.911
	LOC108220170	3-oxoacyl-[acyl-carrier-protein] synthase III, chloroplastic-like	1.50507	0.01	4.871	7.413	8.304	2.19	1.828	3.947
	LOC108200050	alpha-soluble NSF attachment protein-like	1.49676	0.05	16.958	9.027	14.756	5.02	5.474	5.447
	LOC108216853	alkane hydroxylase MAH1-like	1.48889	0.01	7.546	23.628	16.871	4.325	5.711	8.502
	LOC108202160	uncharacterized LOC108202160	1.48653	0.05	7.024	5.417	3.402	1.106	2.155	3.339
	LOC108192286	uncharacterized LOC108192286	1.48425	0.001	20.105	15.743	20.261	7.345	7.481	9.701
	LOC108205668	esterase-like	1.47612	0.05	13.446	9.318	10.701	6.276	3.305	3.4
	LOC108212627	uncharacterized LOC108212627	1.47551	0.05	12.163	16.521	21.631	4.281	2.838	12.07
	LOC108216847	glycine-rich cell wall structural protein 1-like	1.47405	0.05	5.454	7.755	8.677	1.108	4.053	2.649
	LOC108214146	RINT1-like protein MAG2	1.46908	0.05	4.172	1.696	4.864	1.55	1.195	1.287
	LOC108200946	tetraketide alpha-pyrone reductase 1-like	1.45502	0.05	13.783	8.483	7.513	2.397	4.877	4.474
	LOC108199320	1-aminocyclopropane-1-carboxylate oxidase-like	1.44867	0.05	6.922	5.472	7.232	3.267	1.836	2.544
	LOC108206304	probable receptor-like protein kinase At5g47070	1.44249	0.05	9.24	24.481	14.415	9.108	2.162	6.688
	LOC108225776	kynurenine formamidase-like	1.43839	0.05	17.893	11.652	13.782	3.407	8.109	10.327
	LOC108216452	probable protein phosphatase 2C 39	1.43572	0.05	14.354	22.726	9.274	3.753	5.652	9.436
	LOC108194505	uncharacterized LOC108194505	1.42951	0.05	15.235	11.453	18.918	4.911	4.692	9.299
	LOC108215810	protein PIN-LIKES 3-like	1.42731	0.05	13.692	22.684	8.472	8.68	2.573	5.858
	LOC108216494	uncharacterized LOC108216494	1.41522	0.05	7.41	7.434	9.68	2.468	3.983	4.126
	LOC108196489	homocysteine S-methyltransferase 1-like	1.41204	0.05	6.155	7.475	11.738	1.6	4.841	3.506
	LOC108210774	miraculin-like	1.40551	0.05	8.755	3.694	8.186	2.41	3.116	1.902
	LOC108197056	probable thimet oligopeptidase	1.39921	0.05	3.131	3.669	5.59	1.564	2.403	1.384
	LOC108216140	IAA-amino acid hydrolase ILR1-like 6	1.39906	0.05	9.829	7.063	5.223	1.647	4.098	3.223
	LOC108200706	7-deoxyloganetin glucosyltransferase-like	1.39087	0.01	18.538	23.103	19.746	4.651	11.596	10.59
	LOC108220674	auxin-induced protein 22D-like	1.38611	0.05	9.206	14.182	7.569	1.507	4.867	5.811
	LOC108215937	ras-related protein RABA4d-like	1.38083	0.05	7.434	8.286	10.911	2.603	2.771	5.709
	LOC108206466	mitochondrial outer membrane protein porin of 34 kDa-like	1.37143	0.05	9.809	12.244	14.235	1.892	4.128	9.022
	LOC108215828	uncharacterized LOC108215828	1.36289	0.05	14.991	5.794	8.562	3.792	3.255	5.344
	LOC108204310	probable pectate lyase 8	1.36103	0.05	13.854	20.211	9.062	9.416	4.347	3.476
	LOC108215382	disease resistance protein RGA2-like	1.34831	0.05	2.056	1.921	2.795	0.807	0.922	1.123
	LOC108198935	uncharacterized LOC108198935	1.32047	0.05	13.776	15.398	12.939	4.909	4.32	9.851
	LOC108197855	uncharacterized LOC108197855	1.31959	0.05	12.865	11.874	14.934	8.024	3.75	6.661
	LOC108197383	probable xyloglucan endotransglucosylase/hydrolase protein 33	1.31297	0.05	17.552	13.542	16.641	4.703	6.832	11.009
	LOC108206417	geraniol 8-hydroxylase-like	1.31102	0.05	9.224	7.8	15.038	5.298	3.213	6.296
	LOC108199837	7-deoxyloganetic acid glucosyltransferase-like	1.30625	0.05	8.683	7.853	9.732	5.157	2.283	4.292
	LOC108216481	single-stranded DNA-bindig protein WHY2, mitochondrial-like	1.30343	0.05	12.283	10.486	11.877	3.785	7.669	3.775
	LOC108214060	ATPase family AAA domain-containing protein 1-B-like	1.29902	0.05	21.121	17.219	16.525	9.129	4.165	12.71
	LOC108221073	serine acetyltransferase 1, chloroplastic	1.2797	0.05	8.423	12.989	19.305	6.368	4.907	7.785
	LOC108210779	transcription factor VIP1-like	1.27968	0.05	18.411	25.08	18.869	5.333	11.768	13.133
	LOC108202827	fatty acid amide hydrolase	1.25247	0.05	9.69	15.475	7.452	3.22	4.736	6.432
	LOC108193163	putative disease resistance protein RGA4	1.25074	0.05	2.022	1.342	1.824	0.658	0.769	0.97
	LOC108204108	receptor-like protein 12	1.24911	0.05	5.826	3.053	4.437	2.095	2.211	2.029
	LOC108225180	uncharacterized LOC108225180	1.24336	0.05	10.68	16.647	9.735	6.269	4.441	7.304
	LOC108228038	E3 ubiquitin-protein ligase MARCH1	1.23284	0.05	11.818	20.631	13.829	10.555	5.002	11.915
	LOC108223116	endo-1,4-beta-xylanase C-like	1.2226	0.05	9.844	4.871	4.795	3.787	2.877	2.333
	LOC108224314	uncharacterized LOC108224314	1.21803	0.05	11.407	8.921	7.299	3.342	6.066	4.683
	LOC108197679	crocetin glucosyltransferase, chloroplastic-like	1.20544	0.05	12.453	11.795	20.706	6.396	4.772	12.072
	LOC108211041	uncharacterized LOC108211041	1.16862	0.05	8.676	11.729	9.054	6.122	2.487	6.757
	LOC108197417	putative RING-H2 finger protein ATL21B	1.16354	0.05	17.507	15.438	22.561	6.898	10.735	12.346
	LOC108218455	beta-fructofuranosidase, insoluble isoenzyme 1	1.15107	0.05	6.907	17.209	10.407	6.425	5.229	6.511
	LOC108199730	UDP-glycosyltransferase 89B2-like	1.14585	0.05	14.543	22.736	16.54	10.397	6.653	13.188
	LOC108223625	O-acyltransferase WSD1-like	1.13105	0.05	12.461	14.769	21.732	9.678	7.448	9.685
	LOC108214210	ribonucleoside-diphosphate reductase large subunit	1.08507	0.05	11.818	8.885	11.936	4.302	7.301	7.02
	LOC108201970	uncharacterized LOC108201970	1.04451	0.05	11.397	18.467	14.537	10.058	6.77	9.649
	LOC108223664	uncharacterized LOC108223664	-0.995793	0.05	8.206	7.963	5.343	17.269	24.551	20.975
	LOC108218854	tubulin-folding cofactor D	-1.03336	0.05	2.337	2.414	3.151	6.188	8.888	9.188
	LOC108227627	protein EXPORTIN 1A	-1.03874	0.05	3.348	5.075	6.866	13.479	12.317	23.037
	LOC108221735	uncharacterized LOC108221735	-1.04589	0.05	5.34	5.335	2.412	15.289	10.379	10.503
	LOC108223026	enhancer of mRNA-decapping protein 4-like	-1.05932	0.05	3.128	3.349	2.587	8.142	9.223	10.689
	LOC108227456	probable manganese-transporting ATPase PDR2	-1.06181	0.05	2.649	3.506	2.565	7.939	8.046	11.289
	LOC108193377	pentatricopeptide repeat-containing protein At2g15690-like	-1.06347	0.05	7.953	10.971	10.052	23.845	29.845	37.595
	LOC108199406	glyoxysomal fatty acid beta-oxidation multifunctional protein MFP-a	-1.06633	0.05	12.354	9.121	7.163	23.914	26.215	39.854
	LOC108218391	receptor-like protein kinase HAIKU2	-1.07994	0.05	9.83	4.877	3.677	20.403	16.971	22.666
	LOC108227592	protein argonaute 4A-like	-1.08421	0.05	16.26	14.326	16.319	40.069	50.714	55.355
	LOC108223612	uncharacterized LOC108223612	-1.08881	0.05	7.323	6.516	4.467	22.163	16.646	18.571
	LOC108223174	uncharacterized protein At4g26450	-1.10176	0.05	2.569	2.358	2.599	8.589	6.566	9.123
	LOC108197075	spermidine sinapoyl-CoA acyltransferase	-1.10271	0.05	7.758	11.676	9.62	22.63	33.36	39.433
	LOC108200488	protein DETOXIFICATION 30-like	-1.11768	0.05	9.506	13.021	13.074	48.977	29.745	38.575
	LOC108209898	vacuolar amino acid transporter 1-like	-1.12074	0.05	7.796	11.549	8.236	31.733	25.482	32.289
	LOC108205288	protein AIG1	-1.13531	0.05	20.208	7.199	13.393	43.35	35.656	66.614
	LOC108218690	uncharacterized LOC108218690	-1.1363	0.05	2.24	2.348	3.004	7.763	8.263	8.023
	LOC108222817	beta-fructofuranosidase, soluble isoenzyme I	-1.15491	0.05	5.911	3.801	3.551	11.38	19	14.67
	LOC108203046	4-sulfomuconolactone hydrolase	-1.1606	0.05	15.102	8.082	11.681	45.733	34.05	36.257
	LOC108195170	sulfate transporter 3.1-like	-1.1667	0.05	2.92	3.772	2.329	9.526	8.575	13.626
	LOC108202446	methyl-CpG-binding domain-containing protein 9-like	-1.17195	0.05	1.307	1.014	1.229	4.221	4.087	3.727
	LOC108202834	protein NRT1/ PTR FAMILY 1.2-like	-1.18179	0.05	4.7	6.089	5.482	16.527	15.925	24.069
	LOC108214902	leucine-rich repeat receptor-like serine/threonine-protein kinase BAM1	-1.18218	0.05	10.77	12.164	15.605	45.923	36.841	47.436
	LOC108208912	uncharacterized LOC108208912	-1.18264	0.05	12.843	12.711	14.488	34.381	45.454	58.356
	LOC108216249	uncharacterized LOC108216249	-1.21776	0.05	2.934	14.179	5.256	33.092	20.245	33.289
	LOC108223844	uncharacterized LOC108223844	-1.22373	0.05	9.892	8.232	5.971	35.697	26.68	24.749
	LOC108193392	probable LRR receptor-like serine/threonine-protein kinase At1g67720	-1.22469	0.05	1.086	1.22	1.337	5.299	3.914	4.308
	LOC108215538	monodehydroascorbate reductase 4, peroxisomal	-1.22712	0.01	20.295	17.132	12.147	66.989	48.444	59.6
	LOC108227092	probable LRR receptor-like serine/threonine-protein kinase At2g16250	-1.22835	0.05	2.191	1.507	1.665	7.128	6.757	5.464
	LOC108223802	glutamate receptor 3.5-like	-1.22875	0.05	2.409	2.736	3.593	11.391	10.109	10.322
	LOC108227610	protein DEK-like	-1.24416	0.05	4.623	3.029	4.212	13.36	15.319	13.831
	LOC108199986	putative PAP-specific phosphatase, mitochondrial	-1.2468	0.05	5.373	3.433	2.256	15.536	12.891	13.258
	LOC108205802	transaldolase	-1.24759	0.01	10.094	9.055	8.674	22.868	36.676	42.784
	LOC108208989	protein CROWDED NUCLEI 3-like	-1.24992	0.05	1.085	1.042	0.69	4.365	3.369	3.212
	LOC108205446	uncharacterized LOC108205446	-1.25302	0.05	6.391	8.287	5.861	17.019	30.649	28.683
	LOC108193334	RNA-binding protein pno1-like	-1.26044	0.05	3.72	7.744	4.408	13.158	25.31	25.361
	LOC108227901	uncharacterized protein sll1770	-1.26046	0.01	8.057	6.699	10.03	39.609	21.102	30.798
	LOC108212345	DEAD-box ATP-dependent RNA helicase 16	-1.2644	0.05	1.551	1.315	2.216	7.435	4.449	8.299
	LOC108211519	uncharacterized LOC108211519	-1.26665	0.05	10.911	7.657	5.759	20.641	32.38	42.191
	LOC108214175	tRNA(adenine(34)) deaminase, chloroplastic	-1.2676	0.05	1.247	0.701	1.053	4.502	2.609	3.76
	LOC108199732	protein IQ-DOMAIN 14	-1.26826	0.01	5.733	6.717	7.121	21.189	22.463	25.679
	LOC108219988	putative nuclease HARBI1	-1.28061	0.05	2.119	3.335	1.874	6.781	10.674	12.295
	LOC108227595	transcription factor GTE8-like	-1.28081	0.05	2.754	2.094	2.419	10.111	6.45	10.676
	LOC108224518	uncharacterized LOC108224518	-1.28895	0.05	3.568	2.263	3.298	11.979	9.621	12.784
	LOC108205173	cytokinin dehydrogenase 7-like	-1.28942	0.01	6.659	4.181	4.561	21.36	17.706	19.281
	LOC108199609	scarecrow-like protein 9	-1.29483	0.01	5.963	3.819	7.846	20.339	20.008	26.995
	LOC108195838	E3 ubiquitin-protein ligase RGLG2-like	-1.29677	0.05	1.113	0.733	1.713	3.349	4.912	7.293
	LOC108214980	deoxyhypusine hydroxylase-B-like	-1.31115	0.05	1.688	1.869	2.319	7.843	5.671	10.506
	LOC108211382	fatty acid amide hydrolase-like	-1.32143	0.05	4.587	4.795	2.476	18.818	10.514	16.305
	LOC108193518	uncharacterized membrane protein At3g27390	-1.32206	0.05	2.876	2.67	2.459	7.607	11.583	12.333
	LOC108218660	transcription factor GTE4-like	-1.32469	0.05	0.818	1.805	2.207	5.953	6.487	7.484
	LOC108205944	protein STAY-GREEN, chloroplastic-like	-1.32592	0.05	11.436	7.466	4.243	39.475	13.966	48.687
	LOC108197428	ER lumen protein-retaining receptor	-1.34215	0.05	5.938	2.873	4.345	19.833	14.553	19.314
	LOC108193840	cytochrome P450 CYP72A219-like	-1.34334	0.05	5.642	2.02	3.854	14.693	12.271	21.262
	LOC108219268	succinate dehydrogenase subunit 5, mitochondrial-like	-1.36015	0.01	15.116	9.043	16.138	39.524	56.972	64.287
	LOC108210744	transcription factor EGL1	-1.36125	0.01	3.095	3.11	5.176	15.196	13.701	16.923
	LOC108218692	triacylglycerol lipase SDP1	-1.36235	0.05	1.056	3.507	1.825	10.06	6.662	10.91
	LOC108208647	uncharacterized LOC108208647	-1.36724	0.05	2.675	0.833	0.9	7.711	6.36	5.06
	LOC108215826	uncharacterized LOC108215826	-1.37095	0.05	2.514	3.218	2.553	9.681	10.24	14.203
	LOC108211515	uncharacterized LOC108211515	-1.37137	0.01	6.485	14.234	12.167	48.436	56.576	50.045
	LOC108227269	homeobox-DDT domain protein RLT2	-1.37239	0.05	1.316	0.687	0.731	3.278	3.482	4.444
	LOC108192576	protein SRG1-like	-1.38775	0.05	3.611	6.761	4.645	26.679	18.373	18.536
	LOC108208110	uncharacterized LOC108208110	-1.39936	0.05	2.99	1.668	3.66	14.416	15.041	10.757
	LOC108220131	uncharacterized LOC108220131	-1.40417	0.05	4.589	1.288	3.333	14.134	12.65	14.73
	LOC108227983	protein SLOW GREEN 1, chloroplastic	-1.40795	0.01	5.166	3.78	4.068	18.83	16.355	16.332
	LOC108204536	uncharacterized LOC108204536	-1.41103	0.05	1.2	1.939	1.577	9.034	2.641	10.144
	LOC108226270	aladin	-1.41409	0.05	2.803	2.79	1.987	11.914	7.469	14.058
	LOC108210516	glycerophosphodiester phosphodiesterase GDPD6	-1.41469	0.01	12.556	9.387	9.346	41.379	26.939	43.896
	LOC108197447	uncharacterized LOC108197447	-1.42844	0.05	3.039	0.626	1.537	10.905	6.588	7.626
	LOC108227801	uncharacterized LOC108227801	-1.43997	0.05	1.777	1.678	1.631	5.824	5.502	11.885
	LOC108208035	uncharacterized LOC108208035	-1.44474	0.05	4.383	5.248	12.867	19.32	43.096	50.031
	LOC108217789	calcium uniporter protein 4, mitochondrial-like	-1.44729	0.05	2.008	4.538	4.424	15.962	19.475	15.069
	LOC108211832	cytochrome P450 CYP736A12-like	-1.4578	0.05	1.001	0.954	2.053	4.401	6.194	9.89
	LOC108224513	cyclic nucleotide-gated ion channel 4-like	-1.46085	0.01	3.539	4.667	1.893	15.49	12.553	17.504
	LOC108215870	protein yippee-like	-1.46186	0.05	9.943	2.367	3.583	31.449	23.999	22.42
	LOC108206000	FRIGIDA-like protein 4a	-1.46879	0.05	1.622	1.211	1.079	4.298	6.22	7.608
	LOC108199956	uncharacterized LOC108199956	-1.4822	0.05	1.63	0.844	0.497	2.537	5.593	7.723
	LOC108204755	probable disease resistance protein At5g47260	-1.48705	0.01	1.289	2.228	3.463	13.029	7.216	12.976
	LOC108195897	receptor-like serine/threonine-protein kinase ALE2	-1.48865	0.05	0.454	1.039	0.621	2.467	3.849	2.561
	LOC108217844	transcription factor MYB39-like	-1.49215	0.05	2.423	1.652	2.536	4.437	14.614	16.28
	LOC108214602	secoisolariciresinol dehydrogenase-like	-1.50179	0.01	5.756	5.602	3.706	18.055	19.612	32.556
	LOC108221927	7-deoxyloganetin glucosyltransferase-like	-1.5106	0.01	1.448	2.467	2.178	9.459	9.377	10.201
	LOC108225239	uncharacterized membrane protein YuiD	-1.51193	0.01	5.692	10.328	9.454	36.605	37.335	44.85
	LOC108219489	sec1 family domain-containing protein MIP3	-1.51249	0.01	2.814	1.165	1.629	8.158	9.345	8.462
	LOC108226390	phosphoenolpyruvate carboxylase 2-like	-1.57102	0.01	0.748	3.158	2.288	9.209	12.96	10.442
	LOC108200659	uncharacterized LOC108200659	-1.57516	0.01	4.335	5.538	16.502	27.005	55.666	69.692
	LOC108192913	UDP-glycosyltransferase 73E1-like	-1.57942	0.01	2.327	8.625	2.604	25.631	18.441	30.659
	LOC108213746	PHD finger protein ING2-like	-1.59075	0.01	2.882	1.284	3.542	11.842	11.309	18.436
	LOC108203048	uncharacterized protein At1g27050	-1.59569	0.01	4.022	2.087	3.31	8.734	22.28	21.632
	LOC108196353	cryptochrome-1-like	-1.605	0.01	4.895	1.571	7.778	22.091	26.115	31.557
	LOC108194156	caffeoylshikimate esterase-like	-1.65718	0.01	2.233	2.308	2.89	13.572	14.284	12.418
	LOC108227819	uncharacterized LOC108227819	-1.66428	0.01	0.589	0.538	0.985	3.498	3.295	5.39
	LOC108193669	rust resistance kinase Lr10-like	-1.67427	0.01	2.613	4.594	1.392	15.319	16.942	15.906
	LOC108220991	F-box protein PP2-A13	-1.67836	0.01	1.844	3.884	3.97	10.026	22.164	24.497
	LOC108203356	rubisco accumulation factor 1, chloroplastic-like	-1.68168	0.001	2.389	3.155	2.953	13.15	15.966	14.74
	LOC108193046	polyubiquitin	-1.69101	0.001	5.994	13.206	5.913	55.176	36.204	44.732
	LOC108199347	non-functional NADPH-dependent codeinone reductase 2-like	-1.70252	0.01	1.683	2.874	0.836	17.814	20.975	18.958
	LOC108202874	uncharacterized LOC108202874	-1.73439	0.001	8.709	5.483	9.661	54.381	28.219	50.716
	LOC108217561	uridine-cytidine kinase C	-1.75272	0.01	1.214	0.872	0.853	6.753	4.099	6.355
	LOC108207089	cytochrome P450 CYP736A12-like	-1.77172	0.001	6.889	9.14	11.523	40.198	45.812	49.131
	LOC108228009	topless-related protein 4-like	-1.78576	0.05	0.591	1.031	0.74	4.359	6.487	3.862
	LOC108194464	stress-related protein-like	-1.82255	0.001	3.16	2.365	4.125	17.703	18.341	24.196
	LOC108196434	lysophospholipid acyltransferase 1-like	-1.83945	0.01	3.857	5.825	7.035	27.985	44.315	29.396
	LOC108227469	geraniol 8-hydroxylase-like	-1.88292	0.001	20.892	5.229	8.417	72.332	54.487	125.744
	LOC108214104	peroxidase 5-like	-1.88454	0.001	7.016	10.512	5.437	34.022	46.843	68.195
	LOC108227134	uncharacterized LOC108227134	-1.897	0.001	3.699	6.907	5.894	33.116	38.735	31.079
	LOC108195979	protein NEOXANTHIN-DEFICIENT 1	-1.98184	0.001	2.595	1.195	1.811	16.323	9.124	17.17
	LOC108210581	tetrahydrocannabinolic acid synthase-like	-1.98924	0.01	7.956	5.653	4.6	19.617	54.672	60.179
	LOC108202810	carboxylesterase 1-like	-2.2064	0.001	15.686	13.537	8.309	99.06	96.304	94.912
	LOC108198942	protein SRG1-like	-2.23691	0.001	2.75	4.079	10.924	53.315	50.69	66.069
	LOC108212818	F-box protein At2g27310-like	-2.2749	0.001	5.758	1.347	1.318	43.397	22.397	29.924
	LOC108200603	uncharacterized LOC108200603	-2.54492	0.001	4.046	4.373	3.438	42.165	32.846	52.444
	LOC108196248	pyruvate, phosphate dikinase, chloroplastic	-2.9062	0.001	2.447	3.846	1.25	32.379	29.633	47.107
	LOC108210826	beta-glucosidase BoGH3B-like	-3.10503	0.05	1.473	0.94	3.269	43.52	56.368	23.031
	LOC108228193	glutamate-1-semialdehyde 2,1-aminomutase, chloroplastic	-3.24507	0.001	1.179	1.558	0.808	24.276	23.841	23.43
12	LOC108204319	chlorophyll a-b binding protein, chloroplastic-like	3.02819	0.001	339.777	243.444	200.565	44.019	16.911	13.031
	LOC108197064	60S ribosomal protein L27-like	2.43912	0.001	189.725	273.945	222.825	43.31	37.697	64.411
	LOC108220594	uncharacterized protein At4g14100-like	1.99198	0.001	326.446	245.667	190.411	68.016	79.783	66.849
	LOC108206146	chlorophyll a-b binding protein, chloroplastic-like	1.70089	0.01	230.48	218.465	219.941	131.914	25.503	33.248
	LOC108195316	uncharacterized LOC108195316	1.42171	0.05	364.614	219.145	350.936	42.181	126.696	226.323
	LOC108220553	40S ribosomal protein S23	1.38916	0.05	160.278	271.811	358.586	148.164	57.945	142.02
	LOC108227245	21 kDa protein-like	1.31633	0.05	230.728	340.324	136.088	123.687	105.933	104.769
	LOC108219697	uncharacterized LOC108219697	1.28328	0.01	188.799	251.035	222.3	120.486	90.532	130.484
	LOC108220164	glycine-rich protein DC9.1	1.27522	0.05	211.102	301.295	94.047	97.136	125.14	55.747
	LOC108202678	probable nucleoredoxin 1	1.27241	0.05	145.079	252.928	257.961	61.325	157.37	71.047
	LOC108217687	uncharacterized LOC108217687	1.23633	0.05	142.964	247.391	167.796	125.213	83.778	76.59
	LOC108216282	uncharacterized LOC108216282	1.15918	0.05	200.843	187.476	226.626	75.061	127.235	137.751
	LOC108216634	uncharacterized LOC108216634	1.13989	0.05	288.485	224.877	200.013	122.701	95.639	198.526
	LOC108225425	S-norcoclaurine synthase 2-like	1.09054	0.05	265.891	307.819	275.927	153.124	173.297	186.946
13	LOC108200588	early nodulin-like protein 1	-1.36609	0.01	194.035	400.155	193.197	1024.82	1067.85	1076.62
	LOC108208993	ribulose bisphosphate carboxylase small chain 1B, chloroplastic-like	-1.77864	0.05	107.058	24.477	24.791	810.311	2131.1	392.654
	LOC108226177	uncharacterized LOC108226177	-2.84328	0.001	41.255	134.843	113.386	1350.24	1520.72	1373.33
14	LOC108221478	uncharacterized LOC108221478	1.94135	0.01	68.315	70.505	38.69	17.625	16.927	2.987
	LOC108211525	UDP-glycosyltransferase 90A1-like	1.55319	0.05	29.757	103.693	47.708	15.229	31.064	9.189
	LOC108201819	extensin	1.54549	0.01	40.789	95.44	40.976	25.848	35.047	17.781
	LOC108210026	protein NRT1/ PTR FAMILY 6.3-like	1.52114	0.01	47.264	64.198	54.873	14.705	30.585	20.043
	LOC108208721	protein TORNADO 2	1.4133	0.05	47.398	73.047	35.887	7.438	23.29	33.21
	LOC108204002	outer envelope membrane protein 7-like	1.38039	0.05	49.864	87.045	47.358	25.95	36.333	13.544
	LOC108220256	40S ribosomal protein S15a	1.30799	0.05	48.689	66.371	64.027	13.145	37.321	32.478
	LOC108206646	probable aquaporin TIP-type	1.26931	0.05	54.826	73.917	60.3	27.976	42.225	9.056
	LOC108195142	protein SPIRAL1-like 1	1.23562	0.05	44.582	87.188	51.684	23.246	39.621	26.151
	LOC108193644	delta(8)-fatty-acid desaturase-like	1.09449	0.05	44.965	74.779	66.853	44.102	24.428	41.091

## Sheet: wcDEG.2 - S23
Cluster ID	Gene ID	Description	log2FoldChange	FDR≤	TPM
					Cultivated			Wild
					T2-2874B-4	T2-2874B-5	T2-2874B-6	T2-Dc615-5	T2-Dc615-6	T2-Dc615-7
1	LOC108219016	chlorophyll a-b binding protein CP26, chloroplastic	7.02337	0.001	529.224	421.605	1020.8	4.246	4.048	1.928
	LOC108218625	photosystem I reaction center subunit V, chloroplastic	6.86786	0.001	664.492	944.953	1097.92	8.187	6.77	3.937
	LOC108224294	photosystem I reaction center subunit VI, chloroplastic-like	6.85878	0.001	627.755	548.554	606.119	4.468	4.223	3.443
	LOC108211252	photosystem I subunit O	6.64885	0.001	880.238	943.578	949.601	12.63	4.429	2.215
	LOC108204416	photosystem I reaction center subunit III, chloroplastic-like	5.90008	0.001	331.834	448.663	811.907	11.862	3.675	3.636
	LOC108218814	plastocyanin A, chloroplastic	5.88852	0.001	621.29	202.845	566.946	5.105	6.978	2.54
	LOC108208533	ribulose bisphosphate carboxylase small chain 1B, chloroplastic-like	5.39906	0.001	494.846	295.675	842.226	7.398	13.829	2.879
	LOC108202895	photosystem I reaction center subunit N, chloroplastic	5.39394	0.001	347.314	452.43	598.669	4.313	11.982	1.601
	LOC108221843	uncharacterized LOC108221843	5.25211	0.001	184.37	460.723	938.457	8.37	11.384	5.349
	LOC108219969	photosystem I reaction center subunit XI, chloroplastic-like	5.03747	0.001	703.424	549.545	946.117	22.138	22.051	8.611
	LOC108214298	oxygen-evolving enhancer protein 1, chloroplastic-like	4.99149	0.001	324.264	365.413	629.078	8.247	15.197	3.194
	LOC108202416	photosystem II core complex proteins psbY, chloroplastic	4.90779	0.001	548.744	547.991	575.169	15.268	20.253	4.665
	LOC108212029	uncharacterized LOC108212029	4.79696	0.001	163.965	404.484	611.681	3.621	13.182	8.076
	LOC108196650	oxygen-evolving enhancer protein 1, chloroplastic-like	4.79236	0.001	727.516	812.301	1055.52	21.998	36.479	10.396
	LOC108200075	oxygen-evolving enhancer protein 3-2, chloroplastic	4.63159	0.001	327.626	468.019	634.409	13.227	20.741	3.062
	LOC108202621	chlorophyll a-b binding protein CP24 10A, chloroplastic	4.62978	0.001	454.213	464.95	830.554	11.02	24.802	2.085
	LOC108215702	keratin, type II cytoskeletal 1-like	4.32762	0.001	374.3	497.679	717.705	25.81	28.068	9.841
	LOC108202752	photosystem II 5 kDa protein, chloroplastic	4.17902	0.001	498.434	595.678	581.482	20.948	38.447	19.348
	LOC108223489	photosystem II 10 kDa polypeptide, chloroplastic-like	3.92473	0.001	718.277	414.798	524.969	24.64	41.865	24.714
	LOC108205208	ATP synthase gamma chain, chloroplastic	3.69187	0.001	201.547	329.498	641.998	31.047	27.299	6.212
	XLOC_000396		3.65637	0.001	660.546	236.869	695.64	10.912	34.472	42.9
	LOC108210151	uncharacterized LOC108210151	3.17446	0.001	190.557	736.877	646.178	55.645	59.461	19.4
	LOC108227226	oxygen-evolving enhancer protein 2, chloroplastic	2.7532	0.001	246.058	348.825	655.524	59.559	73.327	21.795
	LOC108211661	uncharacterized LOC108211661	2.00299	0.01	374.313	377.507	573.344	36.125	96.52	136.545
	LOC108210721	protein BOBBER 1-like	1.79146	0.01	172.06	530.927	685.004	117.152	137.52	98.776
	LOC108220270	putative protein TPRXL	1.68965	0.01	609.61	558.612	447.995	257.338	138.292	121.752
	LOC108203142	protein trichome birefringence-like 2	1.58213	0.05	337.533	640.521	635.008	45.277	177.462	207.759
2	LOC108205474	probable periplasmic serine endoprotease DegP-like	6.38724	0.001	78.291	122.713	108.224	0.809	1.201	0.657
	LOC108204499	fructose-bisphosphate aldolase 1, chloroplastic	4.00446	0.001	118.799	117.848	150.53	3.384	10.714	2.618
	LOC108217736	uncharacterized LOC108217736	3.66608	0.001	80.192	134.484	131.731	3.609	12.325	2.373
	LOC108210777	uncharacterized LOC108210777	3.50511	0.001	65.194	157.003	127.433	10.492	10.58	4.899
	LOC108199840	uncharacterized LOC108199840	3.12269	0.001	68.364	159.718	177.793	4.15	19.027	8.821
	LOC108193041	glycerate dehydrogenase HPR, peroxisomal	3.04133	0.001	117.05	129.1	158.373	15.817	20.062	4.539
	LOC108204636	protein AIG1-like	2.77853	0.001	70.957	119.823	110.863	18.109	0.624	10.888
	LOC108211097	heat stress transcription factor C-1-like	2.51827	0.001	89.679	142.211	126.219	13.245	19.931	22.392
	LOC108223213	dehydrin DHN1	2.48184	0.001	107.158	116.224	153.499	3.147	33.154	8.584
	LOC108223777	epidermis-specific secreted glycoprotein EP1	2.45577	0.001	102.837	136.475	197.703	27.991	33.245	8.45
	LOC108210393	zinc finger protein CONSTANS-LIKE 6	1.76999	0.001	47.076	99.327	161.118	34.145	25.788	21.708
	LOC108205276	magnesium-chelatase subunit ChlI, chloroplastic-like	1.76489	0.001	86.602	102.944	139.147	33.665	39.517	17.079
	LOC108207107	importin subunit alpha-1a-like	1.71981	0.05	102.058	80.659	163.642	54.229	30.079	1.906
	LOC108196158	uncharacterized protein At4g14100-like	1.63237	0.001	74.649	125.4	148.038	44.79	21.925	39.993
	LOC108219918	uncharacterized LOC108219918	1.62226	0.01	110.076	116.168	114.052	24.165	53.891	23.372
	LOC108195242	uncharacterized LOC108195242	1.59844	0.05	49.614	135.529	115.772	13.641	46.202	22.234
	LOC108222034	30S ribosomal protein S17, chloroplastic	1.54651	0.01	105.265	107.491	94.513	38.792	43.345	23.608
	LOC108208416	ATP synthase subunit b', chloroplastic	1.43408	0.01	90.06	133.824	169.121	44.487	60.386	33.454
	LOC108204903	splicing factor 3B subunit 2	1.33205	0.05	49.008	118.281	150.499	45.044	41.635	29.826
	LOC108205966	universal stress protein PHOS34-like	1.31593	0.05	130.803	100.455	147.379	22.235	71.921	42.185
	LOC108222893	xylose isomerase	1.23061	0.05	74.269	129.796	190.16	70.741	37.362	52.535
	LOC108193339	probable pyridoxal 5'-phosphate synthase subunit PDX1	1.20432	0.05	154.159	117.427	158.106	39.098	83.352	54.789
	LOC108193733	leucine--tRNA ligase, cytoplasmic	1.20296	0.05	101.973	93.188	120.753	55.595	44.228	36.758
	LOC108224620	uncharacterized LOC108224620	1.20054	0.05	94.617	144.477	162.893	45.02	85.114	30.773
	LOC108206153	uncharacterized LOC108206153	1.18901	0.05	124.322	89.24	100.962	32.299	57.175	43.58
	LOC108224391	plant cysteine oxidase 2-like	1.16875	0.05	94.806	87.013	124.661	58.01	36.021	42.287
	LOC108200219	50S ribosomal protein L1, chloroplastic	1.15919	0.05	44.758	95.046	146.29	44.081	46.645	27.868
	LOC108227479	cell division protein FtsZ homolog 2-1, chloroplastic	1.1336	0.05	98.1	117.599	127.543	42.609	58.436	50.586
	LOC108226223	nuclear transcription factor Y subunit B-3-like	1.1267	0.05	87.941	159.899	98.755	42.76	62.413	51.767
	LOC108227778	protein NBR1 homolog	1.10504	0.05	96.842	116.967	170.927	71.917	54.816	50.213
	LOC108216010	ras-related protein RABB1b	1.03415	0.05	113.255	111.512	145.177	61.543	61.946	57.066
	LOC108193837	uncharacterized LOC108193837	1.02569	0.05	94.573	135.955	142.973	54.767	64.129	58.637
3	LOC108213030	uncharacterized LOC108213030	4.65439	0.001	82.891	147.683	65.329	1.253	4.201	1.079
	LOC108210017	beta-amylase 3, chloroplastic	4.35517	0.001	192.026	165.282	35.761	4.644	3.796	4.709
	LOC108194268	dynein 8 kDa light chain, flagellar outer arm-like	3.0191	0.01	62.156	257.301	64.462	10.358	10.989	6.664
	LOC108205188	BURP domain-containing protein 3-like	2.73487	0.001	87.74	169.319	44.593	1.03	17.863	6.328
	XLOC_017998		2.07884	0.001	98.128	134.41	51.358	11.732	22.3	23.517
	LOC108199463	gibberellin-regulated protein 9-like	2.03505	0.05	40.442	188.041	83.433	10.749	35.103	10.812
	orf47	orf47	1.72871	0.05	91.565	233.005	65.882	17.192	5.244	66.1
4	LOC108208939	universal stress protein PHOS34	-1.1353	0.05	100.603	82.352	137.076	283.311	238.704	218.649
	LOC108214831	protein ASPARTIC PROTEASE IN GUARD CELL 1-like	-1.18627	0.05	62.527	119.534	69.489	260.622	206.707	154.395
	LOC108205433	7-dehydrocholesterol reductase	-1.18846	0.05	117.854	125.085	202.54	320.575	338.695	392.343
	LOC108205463	translocon-associated protein subunit alpha-like	-1.22341	0.05	90.075	59.032	105.932	315.812	219.779	224.133
	LOC108196013	leucine-rich repeat receptor-like serine/threonine-protein kinase BAM1	-1.23579	0.05	91.159	113.642	93.275	338.318	191.912	239.569
	LOC108206684	ethylene-responsive transcription factor 4	-1.25535	0.05	89.071	123.938	124.104	330.35	274.178	245.51
	LOC108222866	uncharacterized LOC108222866	-1.26547	0.05	71.57	93.38	62.939	203.978	167.805	157.374
	LOC108220132	probable WRKY transcription factor 70	-1.3313	0.05	117.893	31.038	72.678	200.779	198.285	269.342
	LOC108195143	60S ribosomal protein L39-3-like	-1.33315	0.05	82.175	60.899	66.301	174.319	251.942	170.571
	LOC108205412	ATP synthase subunit gamma, mitochondrial-like	-1.36217	0.05	126.816	120.338	97.301	275.451	344.68	348.554
	LOC108224396	NADH--cytochrome b5 reductase 1	-1.36595	0.01	121.45	107.598	115.501	443.33	256.838	293.307
	LOC108224710	60S ribosomal protein L7-2-like	-1.4093	0.01	58.676	138.932	113.66	296.495	342.762	239.711
	LOC108196584	tubulin alpha chain-like	-1.43551	0.01	63.045	103.413	60.853	305.667	248.5	140.468
	LOC108219376	UDP-D-apiose/UDP-D-xylose synthase 2	-1.46943	0.05	32.657	95.252	74.284	196.002	235.313	164.824
	LOC108224103	fasciclin-like arabinogalactan protein 2	-1.4762	0.05	50.294	178.457	129.028	417.768	406.61	255.078
	LOC108197118	probable methyltransferase At1g27930	-1.52287	0.05	18.98	111.43	65.054	276.142	152.369	213.594
	LOC108210217	lipid transfer-like protein VAS	-1.549	0.05	43.221	101.384	12.21	207.815	192.869	177.165
	LOC108204697	classical arabinogalactan protein 26	-1.61387	0.05	21.596	104.362	22.958	238.985	177.374	134.646
	LOC108204680	short-chain dehydrogenase/reductase 2b-like	-1.61436	0.01	38.927	95.463	46.052	223.022	169.542	222.105
	LOC108205185	aquaporin PIP1-3-like	-1.65721	0.05	176.715	72.392	18.486	623.922	296.193	351.913
	LOC108205664	uncharacterized protein At4g22758-like	-1.7206	0.001	103.613	152.291	118.211	417.801	405.212	521.424
	LOC108217703	uncharacterized LOC108217703	-1.72577	0.001	68.589	79.629	54.821	282.79	241.512	237.746
	LOC108209607	arabinogalactan peptide 20	-1.73015	0.001	29.589	98.563	58.061	260.237	243.001	185.953
	LOC108200598	peptidyl-prolyl cis-trans isomerase 1-like	-1.89271	0.01	35.816	50.816	67.095	169.213	249.453	196.571
	LOC108214520	thioredoxin H-type 1	-1.90229	0.01	69.209	142.942	30.454	331.496	435.128	346
	LOC108193683	lysine-rich arabinogalactan protein 18	-1.96036	0.05	18.397	107.175	17.223	360.024	251.291	143.274
	LOC108192853	classical arabinogalactan protein 9-like	-1.96633	0.001	79.788	83.289	49.175	498.751	314.786	209.059
	LOC108196617	uncharacterized LOC108196617	-2.0544	0.001	26.224	107.691	36.16	407.296	273.157	180.813
	LOC108208919	phosphomethylpyrimidine synthase, chloroplastic	-2.11086	0.001	35.913	45.572	32.364	225.302	190.229	167.604
	LOC108223352	microtubule-associated protein TORTIFOLIA1-like	-2.17461	0.001	64.336	128.679	55.54	529.605	459.726	315.937
	LOC108221993	histone H4	-2.37284	0.001	20.983	98.613	21.75	448.94	277.77	275.497
	LOC108200606	caffeoyl-CoA O-methyltransferase-like	-2.61693	0.001	27.548	57.175	26.038	306.012	228.436	274.799
	LOC108205125	succinate-semialdehyde dehydrogenase, mitochondrial-like	-2.62797	0.001	5.869	37.435	31.626	243.321	183.115	155.326
	LOC108209000	protein E6	-2.69513	0.01	7.989	57.706	14.028	367.281	134.414	241.142
	LOC108203972	BURP domain protein RD22	-2.6991	0.01	16.215	60.787	41.816	324.377	185.984	400.489
	LOC108206917	protein CDI-like	-2.75121	0.001	14.034	47.162	17.204	237.824	163.824	258.55
	LOC108205617	metallothionein-like protein 1	-2.8465	0.05	15.784	94.019	51.431	191.758	362.724	781.626
	LOC108224398	aspartyl protease AED3-like	-3.30156	0.001	22.667	24.256	9.167	423.671	208.292	162.998
	LOC108193516	stress-associated endoplasmic reticulum protein 2-like	-3.67235	0.001	11.927	10.82	29.97	203	300.574	356.327
5	LOC108218486	BRASSINOSTEROID INSENSITIVE 1-associated receptor kinase 1-like	-1.1534	0.05	154.314	344.239	262.686	606.318	599.326	579.161
	LOC108216182	classical arabinogalactan protein 5-like	-1.29368	0.05	130.318	228.473	251.152	577.124	583.105	413.884
	LOC108226400	14-3-3-like protein C	-1.31378	0.05	231.811	210.077	200.31	639.79	642.518	471.126
	LOC108227860	14-3-3-like protein B	-1.32628	0.05	111.326	258.622	194.847	488.762	430.632	581.5
	LOC108192696	uncharacterized LOC108192696	-1.46807	0.05	56.772	288.234	345.125	717.441	641.265	745.722
	LOC108196255	adenosylhomocysteinase	-1.54496	0.01	180	245.707	185.894	731.141	670.631	534.309
	LOC108200852	uncharacterized LOC108200852	-1.61952	0.01	112.802	331.193	214.326	724.674	667.996	792.858
	LOC108225176	probable histone H2A.1	-1.72371	0.01	130.82	150.85	79.979	465.775	493.484	434.086
	LOC108205223	aspartyl protease AED3-like	-2.31205	0.001	73.828	307.094	145.574	1369.44	1121.58	687.824
	LOC108209058	36.4 kDa proline-rich protein-like	-2.31651	0.01	243.49	144.626	42.676	1412.21	615.055	1314.6
	LOC108224641	cannabidiolic acid synthase-like 1	-2.65336	0.001	64.24	82.354	48.702	588.465	317.541	567.93
	LOC108209059	14 kDa proline-rich protein DC2.15-like	-2.75081	0.001	20.909	197.305	19.152	1286.05	964.558	445.104
	LOC108223569	fasciclin-like arabinogalactan protein 2	-2.87156	0.001	50.976	198.248	64.114	1072.86	1071.78	785.005
	LOC108219923	glucose-6-phosphate/phosphate translocator 2, chloroplastic-like	-3.89681	0.05	3.836	39.025	22.295	167.059	1104.35	463.116
6	LOC108215818	aquaporin SIP1-1-like	-1.0424	0.05	45.602	45.966	53.736	98.252	95.479	120.884
	LOC108227582	subtilisin-like protease SBT1.4	-1.08282	0.05	31.85	42.107	40.627	114.999	64.349	81.777
	LOC108203007	citrate synthase, mitochondrial	-1.09739	0.05	45.874	43.385	52.097	105.419	120.989	94.329
	LOC108223714	26S proteasome regulatory subunit 4 homolog A-like	-1.10342	0.05	29.914	52.113	35.467	119.994	81.84	70.3
	LOC108210426	probable sugar phosphate/phosphate translocator At5g25400	-1.12224	0.05	54.474	59.559	32.039	127.488	126.559	104.317
	LOC108217067	uncharacterized LOC108217067	-1.12376	0.05	29.319	66.849	44	138.415	91.907	97.72
	LOC108196831	shikimate O-hydroxycinnamoyltransferase	-1.12816	0.05	56.97	38.898	38.623	110.024	105.568	111.967
	LOC108208764	phosphatidylinositol 4-kinase gamma 4-like	-1.14334	0.05	36.616	44.967	35.705	96.542	110.487	77.478
	LOC108193598	probable glutathione peroxidase 2	-1.15892	0.05	40.427	60.448	29.169	114.181	115.773	86.222
	LOC108204345	cytochrome b561 and DOMON domain-containing protein At3g25290-like	-1.17981	0.05	35.826	50.197	25.71	97.049	95.429	88.268
	LOC108206729	ubiquitin carboxyl-terminal hydrolase 3	-1.22471	0.05	20.532	55.281	42.361	86.981	101.11	98.67
	LOC108224003	caffeoylshikimate esterase	-1.23478	0.05	29.965	43.451	28.512	105.755	70.807	91.266
	LOC108209630	GATA transcription factor 8-like	-1.25255	0.05	28.501	36.264	40.236	99.573	89.136	71.38
	LOC108215571	protein EXORDIUM	-1.2575	0.05	25.292	52.482	38.025	114.765	72.185	110.631
	LOC108209191	luminal-binding protein	-1.27908	0.05	64.913	57.622	62.227	233.192	113.705	152.075
	LOC108219550	leucine-rich repeat receptor-like protein kinase PXC1	-1.30102	0.05	39.425	40.306	32.017	133.112	80.462	95.754
	LOC108224579	cyclin-D3-3-like	-1.34468	0.05	49.502	74.37	50	150.354	188.213	134.401
	LOC108193724	protein SPIRAL1-like 1	-1.38555	0.05	14.502	55.378	15.658	103.207	87.107	69.674
	LOC108215107	glucan endo-1,3-beta-glucosidase-like	-1.40803	0.01	16.513	42.99	49.7	149.923	101.33	116.932
	LOC108215208	purple acid phosphatase 18	-1.45168	0.01	32.232	75.576	62.416	209.705	128.313	146.102
	LOC108199701	auxin transporter-like protein 2	-1.47383	0.01	39.053	31.733	32.875	130.724	94.054	96.824
	LOC108205620	expansin-A4-like	-1.48034	0.01	37.496	67.127	21.099	164.586	141.22	106.635
	LOC108223042	phosphoenolpyruvate carboxylase 2	-1.57831	0.01	28.436	32.76	24.168	109.986	87.997	85.538
	LOC108227954	fasciclin-like arabinogalactan protein 17	-1.654	0.01	13.028	46.825	21.207	106.334	98.234	85.976
	LOC108208960	expansin-A4	-1.67958	0.05	17.101	79.312	13.536	152.624	129.315	145.634
	LOC108205654	L-ascorbate peroxidase, cytosolic-like	-1.70749	0.001	33.554	57.316	49.819	147.757	174.703	160.366
	LOC108219502	fasciclin-like arabinogalactan protein 1	-1.72828	0.01	10.623	50.556	13.034	117.436	94.006	83.803
	LOC108223978	fasciclin-like arabinogalactan protein 7	-1.73623	0.001	36.382	40.312	18.879	154.058	141.871	81.618
	LOC108192895	putative glucose-6-phosphate 1-epimerase	-1.73697	0.001	28.741	63.741	42.517	160.084	150.399	175.34
	LOC108222973	glutathione S-transferase L3-like	-1.8144	0.05	21.995	59.353	23.365	163.772	93.625	172.489
	LOC108226295	stem-specific protein TSJT1-like	-1.82458	0.001	26.536	31.237	18.014	87.018	105.05	112.813
	LOC108214707	subtilisin-like protease SBT1.7	-1.82926	0.05	26.255	33.291	25.895	123.885	74.078	143.025
	LOC108205056	probable pectinesterase/pectinesterase inhibitor 51	-1.89054	0.001	26.038	32.227	22.368	125.799	111.978	96.76
	LOC108192995	periaxin-like	-1.9086	0.01	37.286	36.663	7.302	131.473	112.623	172.884
	LOC108223883	histone H2A	-1.92267	0.01	19.825	39.406	4.844	129.538	111.953	86.028
	LOC108215819	uncharacterized LOC108215819	-1.93644	0.01	4.588	50.914	17.857	152.365	94.377	108.618
	LOC108217749	gibberellin-regulated protein 14-like	-1.93847	0.01	17.202	36.21	6.443	101.324	107.355	86.626
	LOC108220420	cysteine protease XCP2	-1.94647	0.05	28.941	38.338	7.554	188.197	73.261	125.82
	LOC108224615	protein EXORDIUM-like 2	-1.98513	0.05	7.554	25.411	48.495	94.641	112.151	157.572
	LOC108198633	delta(12)-fatty-acid desaturase FAD2-like	-1.99144	0.01	5.885	43.824	11.069	134.824	73.469	100.931
	XLOC_016041		-2.00833	0.01	26.962	30.197	5.527	112.381	118.86	97.814
	LOC108193640	probable cyclin-dependent serine/threonine-protein kinase DDB_G0292550	-2.02637	0.001	17.926	37.016	8.709	119.908	96.317	103.819
	LOC108202101	endoglucanase 17	-2.11751	0.01	31.855	38.649	7.359	235.798	99.603	136.876
	LOC108223433	L-ascorbate oxidase homolog	-2.14375	0.001	19.324	26.597	6.285	154.894	77.359	75.815
	LOC108199536	sugar transport protein 13-like	-2.16517	0.001	21.571	17.498	22.542	117.701	81.836	106.773
	LOC108206290	uncharacterized LOC108206290	-2.20251	0.01	12.16	26.213	1.893	82.225	103.732	79.981
	LOC108196842	S-adenosylmethionine synthase 2	-2.24971	0.001	17.461	31.116	26.948	143.877	100.744	151.591
	LOC108195253	uncharacterized LOC108195253	-2.29075	0.001	31.448	9.904	13.697	172.65	107.788	86.628
	LOC108224331	dihydroflavonol-4-reductase-like	-2.29607	0.001	7.587	28.954	22.953	125.549	95.79	106.268
	LOC108215108	fasciclin-like arabinogalactan protein 15	-2.3205	0.001	7.767	41.712	9.174	170.604	117.716	95.946
	LOC108205150	ABC transporter G family member 11-like	-2.3686	0.05	13.905	29.963	19.203	201.896	71.774	115.82
	LOC108206081	protein EXORDIUM-like 5	-2.41232	0.001	10.254	24.386	9.039	102.622	114.43	65.702
	LOC108200737	ubiquitin-conjugating enzyme E2 20-like	-2.50249	0.001	2.276	26.668	26.198	211.691	109.035	97.744
	LOC108204616	aspartyl protease family protein At5g10770-like	-2.51466	0.001	6.625	36.888	21.128	148.681	123.285	193.799
	LOC108216523	basic blue protein-like	-2.57361	0.001	25.836	2.534	9.91	140.478	174.313	63.462
	LOC108206745	mitochondrial carnitine/acylcarnitine carrier-like protein	-2.73168	0.001	5.211	12.049	20.445	74.334	99.309	107.255
	LOC108200638	cyclin-U4-1	-2.85111	0.001	4.639	29.667	7.252	199.396	146.888	81.334
	LOC108225089	cysteine protease RD19A	-3.30113	0.05	2.435	8.508	9.763	174.958	107.524	25.03
	LOC108214223	beta-glucosidase BoGH3B-like	-3.35757	0.01	8.921	13.089	7.792	228.716	102.805	74.936
	LOC108209046	1-aminocyclopropane-1-carboxylate oxidase	-3.39564	0.001	1.589	14.051	6.066	153.849	78.833	96.647
	LOC108209701	tetraspanin-19-like	-3.42236	0.05	6.2	11.46	4.978	79.062	76.99	172.597
	LOC108199724	protein PHLOEM PROTEIN 2-LIKE A1-like	-3.97084	0.001	3.064	5.946	9.426	327.908	26.903	186.775
	LOC108206602	expansin-like B1	-4.23138	0.001	4.027	2.863	3.037	246.774	22.041	110.346
7	LOC108208530	ribulose bisphosphate carboxylase small chain 1B, chloroplastic-like	4.78859	0.001	161.953	166.512	168.782	6.79	4.366	5.059
	LOC108192787	fructose-bisphosphate aldolase 1, chloroplastic	3.2689	0.001	98.189	221.762	240.462	3.255	24.701	7.659
	LOC108192662	uncharacterized LOC108192662	2.21203	0.05	66.591	357.067	176.866	59.4	13.402	34.854
	LOC108214328	cytochrome b6-f complex iron-sulfur subunit, chloroplastic	2.19428	0.001	124.264	240.171	322.692	54.464	51.706	32.81
	LOC108198277	uncharacterized LOC108198277	2.1586	0.05	36.673	416.788	86.565	41.666	35.363	13.584
	LOC108217686	uncharacterized LOC108217686	1.9893	0.001	167.989	247.79	117.459	68.229	29.732	35.433
	LOC108224991	prefoldin subunit 1	1.92676	0.001	109.116	189.513	127.878	30.013	15.52	52.717
	LOC108208521	protein TSS-like	1.86752	0.01	79.87	152.696	208.976	12.025	51.412	30.505
	LOC108228023	glutamate-1-semialdehyde 2,1-aminomutase, chloroplastic	1.80414	0.001	115.033	160.537	251.924	43.588	57.775	36.416
	LOC108192255	DEAD-box ATP-dependent RNA helicase 3, chloroplastic-like	1.68016	0.01	140.218	173.328	291.612	61.019	77.774	34.248
	LOC108219978	30S ribosomal protein S20, chloroplastic	1.61199	0.001	117.655	196.743	187.439	60.281	60.062	36.297
	LOC108216466	uncharacterized LOC108216466	1.55554	0.01	139.505	265.71	170.861	41.486	60.763	76.267
	LOC108203703	uncharacterized LOC108203703	1.49691	0.01	169.16	209.691	236.416	110.704	48.649	56.544
	LOC108203593	remorin-like	1.49074	0.01	90.262	127.23	254.456	45.748	67.409	35.438
	LOC108208996	uncharacterized LOC108208996	1.46296	0.01	149.932	183.072	221.818	56.078	74.052	61.551
	LOC108221248	uncharacterized LOC108221248	1.4591	0.01	132.133	174.92	212.364	70.173	72.851	42.52
	LOC108223969	dnaJ homolog subfamily B member 9	1.45083	0.01	138.506	143.997	150.024	63.969	45.21	49.962
	LOC108198117	protein ELF4-LIKE 3-like	1.36415	0.05	213.704	308.972	177.837	37.838	75.56	71.165
	LOC108221699	uncharacterized LOC108221699	1.36285	0.05	57.609	193.551	170.683	40.152	74.551	52.546
	LOC108225792	CCG-binding protein 1	1.253	0.05	144.416	158.366	241.393	83.209	73.332	68.918
	LOC108196278	elongation factor TuB, chloroplastic-like	1.22586	0.05	212.659	168.857	278.825	98.604	95.977	85.105
	LOC108192636	mitochondrial import inner membrane translocase subunit TIM17-2-like	1.21297	0.05	264.806	220.647	184.788	62.565	106.556	110.749
	LOC108215290	60S ribosomal protein L11	1.21047	0.05	237.49	224.112	151.201	86.467	102.559	78.706
	LOC108201754	peptidyl-prolyl cis-trans isomerase CYP22	1.16042	0.05	135.042	265.703	231.062	80.804	91.989	97.965
	LOC108210859	MKI67 FHA domain-interacting nucleolar phosphoprotein-like	1.14327	0.05	90.691	190.752	145.741	64.82	80.511	37.12
	LOC108193229	uncharacterized LOC108193229	1.1381	0.05	53.822	175.467	146.187	53.087	43.184	60.865
	LOC108227967	uncharacterized LOC108227967	1.13	0.05	63.514	158.441	178.393	52.95	68.829	47.453
	LOC108228113	uncharacterized LOC108228113	1.10631	0.05	81.252	177.651	127.369	54.407	60.83	58.902
8	LOC108202090	sucrose synthase 2	6.01937	0.001	37.22	31.724	176.513	0.427	0.367	0.877
	LOC108196730	BTB/POZ domain-containing protein At5g67385-like	5.5479	0.001	43.633	8.629	165.099	0.598	0.542	0.444
	LOC108223184	magnesium-protoporphyrin IX monomethyl ester [oxidative] cyclase, chloroplastic-like	4.81228	0.001	70.941	92.161	185.837	4.324	3.408	1.716
	LOC108210047	rhodanese-like domain-containing protein 4, chloroplastic	4.28963	0.001	59.583	70.313	167.541	6.67	2.538	0.782
	XLOC_028454		4.11609	0.001	73.45	51.551	149.342	2.912	4.092	4.552
	LOC108202773	28 kDa ribonucleoprotein, chloroplastic	3.82144	0.001	76.274	46.758	134.357	6.222	4.692	3.972
	LOC108227375	glutamyl-tRNA reductase 1, chloroplastic	3.02273	0.001	37.122	117.821	297.883	16.905	13.975	8.976
	LOC108227868	thylakoid lumenal 16.5 kDa protein, chloroplastic	2.59756	0.001	61.018	80.611	148.674	20.217	14.597	6.031
	LOC108199757	triose phosphate/phosphate translocator, chloroplastic	2.30867	0.001	87.026	73.064	176.089	38.424	13.882	8.481
	LOC108199406	glyoxysomal fatty acid beta-oxidation multifunctional protein MFP-a	1.60461	0.05	51.586	73.636	163.838	29.817	39.275	12.725
9	LOC108223576	peroxisomal (S)-2-hydroxy-acid oxidase GLO1-like	4.85385	0.001	8.187	22.624	72.603	0.443	0.532	0.714
	LOC108219296	chlorophyllide a oxygenase, chloroplastic	4.74943	0.001	42.103	42.639	100.125	1.908	2.186	0.494
	LOC108195848	protein NRT1/ PTR FAMILY 5.2-like	4.05832	0.001	40.573	17.056	94.732	21.17	3.164	2.533
	LOC108210161	uncharacterized LOC108210161	4.03676	0.001	38.629	33.885	98.938	2.961	2.995	2.064
	LOC108196892	uncharacterized LOC108196892	3.91981	0.001	32.333	74.82	97.125	2.855	3.811	3.162
	LOC108201748	protein LNK3	3.65842	0.001	12.657	35.904	95.912	2.771	3.415	1.419
	LOC108210620	ribulose bisphosphate carboxylase/oxygenase activase, chloroplastic-like	3.18785	0.01	12.168	27.939	103.474	3.457	4.851	0.956
	LOC108218051	magnesium-chelatase subunit ChlH, chloroplastic	3.18203	0.001	49.761	33	97.291	7.42	5.481	4.079
	LOC108217635	phosphoenolpyruvate carboxylase 2-like	3.09312	0.01	11.234	3.593	79.77	1.298	1.612	2.175
	LOC108223305	protein ENHANCED DOWNY MILDEW 2-like	3.04665	0.001	26.623	31.897	86.696	2.445	5.587	4.624
	LOC108222901	uncharacterized LOC108222901	2.75513	0.001	34.137	39.939	74.791	11.023	3.385	4.212
	LOC108208966	aminopeptidase M1-like	2.6845	0.001	30.595	19.547	69.987	6.593	3.799	4.326
	LOC108214411	FAD-dependent urate hydroxylase-like	2.58424	0.001	49.071	50.817	80.36	4.182	13.201	6.504
	LOC108210675	alpha carbonic anhydrase 1, chloroplastic-like	2.55408	0.001	19.601	56.411	93.059	18.111	4.081	2.194
	LOC108226886	magnesium-chelatase subunit ChlD, chloroplastic	2.52262	0.001	57.844	37.78	114.183	13.736	11.52	5.846
	LOC108199630	putative calcium-transporting ATPase 13, plasma membrane-type	2.40044	0.001	38.686	5.124	77.652	0.498	8.62	0.431
	LOC108195151	chaperone protein ClpB3, chloroplastic-like	2.25038	0.05	45.57	26.218	96.019	10.479	12.217	7.211
	LOC108227495	DNA repair protein RAD16-like	2.14141	0.01	25.577	37.79	110.311	14.522	5.912	10.997
	LOC108205607	protein indeterminate-domain 7-like	2.05796	0.001	35.47	25.746	83.559	12.627	5.288	8.112
	LOC108199685	DEAD-box ATP-dependent RNA helicase 50	1.97818	0.001	30.208	36.065	85.775	10.241	16.69	4.604
	LOC108215322	glutamyl-tRNA reductase 1, chloroplastic-like	1.91941	0.05	23.363	47.328	126.679	16.855	13.178	13.053
	LOC108202833	protochlorophyllide-dependent translocon component 52, chloroplastic	1.8851	0.001	35.127	63.69	82.802	21.032	15.807	8.489
	LOC108209326	elongation factor G-2, chloroplastic	1.80264	0.001	46.387	36.21	79.393	15.351	18.069	8.814
	LOC108222932	amidase 1-like	1.79223	0.05	49.768	32.576	88.886	15.143	20.16	8.454
	LOC108223828	uncharacterized exonuclease domain-containing protein At3g15140	1.57135	0.01	37.715	56.28	80.284	16.065	25.105	11.165
	LOC108204926	mitochondrial amidoxime reducing component 2	1.55059	0.01	35.94	58.974	85.431	10.21	28.499	13.518
	LOC108224543	homeobox-leucine zipper protein ATHB-12-like	1.3408	0.05	17.876	43.07	83.707	21.868	7.714	20.311
	LOC108218435	33 kDa ribonucleoprotein, chloroplastic	1.1914	0.05	24.368	45.554	74.369	14.089	26.782	14.382
10	LOC108228022	probable GTP diphosphokinase RSH2, chloroplastic	-0.994624	0.05	12.947	15.71	16.732	36.557	30.772	28.558
	LOC108210545	calcium/calmodulin-regulated receptor-like kinase 2	-1.03825	0.05	11.811	12.718	14.762	27.054	26.567	31.015
	LOC108227382	translation initiation factor eIF-2B subunit beta	-1.04193	0.05	9.694	18.329	15.886	34.949	31.939	24.409
	LOC108225735	uncharacterized LOC108225735	-1.05244	0.05	19.562	20.553	15.17	48.887	37.18	39.401
	LOC108228140	post-GPI attachment to proteins factor 3-like	-1.05543	0.05	13.926	15.259	24.899	41.849	27.362	45.63
	LOC108199093	probable methyltransferase PMT3	-1.06145	0.05	13.912	16.593	18.325	48.696	38.504	23.332
	LOC108195233	C-type lectin receptor-like tyrosine-protein kinase At1g52310	-1.06307	0.05	7.598	14.514	11.16	31.811	22.128	20.657
	LOC108222840	probable pectin methyltransferase QUA2	-1.07167	0.05	8.953	11.731	8.824	29.973	19.372	18.387
	LOC108215927	phosphatidylinositol/phosphatidylcholine transfer protein SFH9-like	-1.08151	0.05	12.262	24.796	17.092	44.4	38.471	34.411
	LOC108219251	V-type proton ATPase subunit a3-like	-1.08228	0.05	9.156	8.412	12.647	30.594	22.294	15.902
	LOC108206622	uncharacterized LOC108206622	-1.0845	0.05	12.346	14.459	10.487	32.441	24.931	31.093
	LOC108228147	protein QUIRKY-like	-1.09997	0.05	8.507	19.352	14.106	40.615	30.526	24.332
	LOC108203409	sugar transporter ERD6-like 7	-1.10226	0.05	7.793	19.653	24.012	41.581	37.58	33.889
	LOC108214872	proline-rich receptor-like protein kinase PERK3	-1.10731	0.05	16.94	19.658	11.942	47.145	37.749	31.108
	LOC108214189	diacylglycerol kinase 5	-1.10883	0.05	7.307	8.457	10.526	25.384	13.99	21.086
	LOC108196501	CSC1-like protein At1g32090	-1.11893	0.05	7.355	9.434	6.684	25.767	16.406	14.223
	LOC108202644	3-hydroxyisobutyryl-CoA hydrolase 1-like	-1.12908	0.05	12.512	14.849	13.685	42.774	29.476	31.084
	LOC108209008	probable inactive receptor kinase At1g27190	-1.13071	0.05	17.149	20.913	15.529	56.934	41.61	31.984
	LOC108199923	palmitoyl-acyl carrier protein thioesterase, chloroplastic-like	-1.13372	0.05	8.014	23.307	18.179	46.272	35.985	32.754
	LOC108206087	peroxisomal 2,4-dienoyl-CoA reductase-like	-1.14028	0.05	11.953	21.329	12.155	40.886	34.626	34.769
	LOC108227809	cinnamoyl-CoA reductase 1-like	-1.15648	0.05	8.775	10.191	8.011	24.14	19.199	22.289
	LOC108219150	mitogen-activated protein kinase 15-like	-1.15951	0.05	5.808	15.067	6.033	28.38	21.873	16.894
	LOC108196353	cryptochrome-1-like	-1.15989	0.05	13.95	9.061	31.957	54.797	35.624	40.001
	LOC108209738	patatin-like protein 7	-1.16161	0.05	5.095	11.998	4.736	25.93	29.616	25.833
	LOC108215428	probable polygalacturonase	-1.16397	0.05	9.244	15.922	7.928	38.2	22.481	23.016
	LOC108219858	ankyrin and armadillo repeat-containing protein	-1.17374	0.05	10.807	12.233	9.698	39.21	17.585	26.574
	LOC108210628	peptide-N4-(N-acetyl-beta-glucosaminyl)asparagine amidase A	-1.19896	0.05	3.443	9.95	11.547	29.596	21.64	12.266
	LOC108211104	protein indeterminate-domain 2-like	-1.20022	0.05	5.505	14.209	7.218	29.675	19.613	19.13
	LOC108205303	uncharacterized LOC108205303	-1.20037	0.05	11.896	24.332	14.353	48.341	34.417	46.687
	LOC108218602	uncharacterized LOC108218602	-1.20371	0.05	6.538	10.314	12.36	26.681	17.776	27.486
	LOC108217571	probable carboxylesterase 18	-1.23636	0.05	4.992	5.144	11.403	25.796	12.519	17.586
	LOC108220632	HMG1/2-like protein	-1.23962	0.05	10.54	23.297	16.833	49.23	43.402	37.08
	LOC108210016	probable serine/threonine-protein kinase At1g01540	-1.25643	0.05	10.782	23.235	15.261	52.977	46.052	29.274
	LOC108220176	uncharacterized LOC108220176	-1.25653	0.05	6.821	11.93	11.787	38.682	22.193	19.033
	LOC108202643	probable methyltransferase PMT4	-1.25924	0.05	6.95	10.497	10.685	36.316	17.885	21.542
	LOC108196891	uncharacterized LOC108196891	-1.26364	0.05	20.988	10.568	12.436	57.658	33.508	34.373
	LOC108197744	uncharacterized LOC108197744	-1.26373	0.05	5.198	12.537	9.251	24.297	21.318	25.278
	LOC108224854	ubiquitin thioesterase OTU1	-1.26564	0.05	7.882	17.378	9.044	41.059	26.449	24.707
	LOC108209183	probable protein S-acyltransferase 22	-1.26951	0.05	10.31	9.934	6.418	37.54	18.011	19.683
	LOC108215413	uncharacterized protein At1g01500	-1.27902	0.05	10.372	12.902	10.273	34.389	31.554	22.798
	LOC108202911	F-box/kelch-repeat protein SKIP11-like	-1.28234	0.05	8.544	11.488	6.203	30.563	16.166	23.997
	LOC108219530	U-box domain-containing protein 40-like	-1.28256	0.05	18.328	11.846	15.812	40.099	36.206	47.552
	LOC108214399	beta-galactosidase-like	-1.28988	0.05	6.729	5.551	9.347	30.594	15.622	13.207
	LOC108224823	uncharacterized LOC108224823	-1.29246	0.05	10.767	15.563	24.522	69.9	32.767	32.382
	LOC108226902	calcium-dependent protein kinase 2-like	-1.29367	0.05	6.532	9.43	4.905	25.739	12.919	19.404
	LOC108199240	serine/threonine-protein kinase CDL1-like	-1.30384	0.01	11.42	21.262	20.512	48.472	47.006	41.721
	LOC108226443	mavicyanin-like	-1.30974	0.05	17.324	15.749	5.654	43.862	31.374	42.112
	LOC108193323	uncharacterized LOC108193323	-1.31378	0.05	17.747	22.42	11.711	34.051	25.213	28.008
	LOC108210254	E3 ubiquitin-protein ligase RGLG2-like	-1.31431	0.01	14.334	16.091	11.453	46.881	37.61	33.481
	LOC108200273	peptidyl-prolyl cis-trans isomerase CYP23	-1.32029	0.05	11.127	14.211	10.508	40.942	23.828	32.244
	LOC108215826	uncharacterized LOC108215826	-1.32184	0.05	6.245	8.861	5.091	21.063	22.623	13.132
	LOC108193711	delta(7)-sterol-C5(6)-desaturase-like	-1.32845	0.05	8.832	13.364	21.617	41.465	44.578	30.277
	LOC108208981	nuclear transport factor 2-like	-1.34068	0.05	9.108	11.889	7.688	27.854	29.873	25.003
	LOC108212375	uncharacterized LOC108212375	-1.34324	0.05	7.179	8.666	21.053	28.328	30.855	37.185
	LOC108215796	uncharacterized LOC108215796	-1.34774	0.01	4.599	7.081	8.874	21.317	17.058	16.908
	LOC108219206	leishmanolysin-like peptidase	-1.35282	0.01	7.133	9.617	10.35	28.359	19.289	26.191
	LOC108228189	vacuolar-sorting receptor 3-like	-1.35395	0.05	12.625	20.33	14.149	58.977	27.952	47.227
	LOC108215607	senescence-associated carboxylesterase 101-like	-1.35408	0.05	7.287	3.832	10.38	23.602	10.408	22.785
	LOC108210266	probable xyloglucan galactosyltransferase GT19	-1.35529	0.05	4.247	11.624	11.075	30.589	22.914	21.402
	LOC108219835	transcription initiation factor TFIID subunit 14b	-1.3646	0.05	2.921	13.92	12.527	29.595	26.525	25.507
	LOC108215668	retinol dehydrogenase 12-like	-1.3707	0.01	5.695	8.123	7.891	26.973	16.186	17.561
	LOC108210274	serine/threonine-protein phosphatase PP1 isozyme 2	-1.37477	0.01	9.052	12.003	16.605	37.143	34.329	31.608
	LOC108207191	zinc finger CCCH domain-containing protein 32	-1.37875	0.05	11.291	11.956	5.906	24.545	32.995	28.728
	LOC108217631	very-long-chain (3R)-3-hydroxyacyl-CoA dehydratase PASTICCINO 2A	-1.37913	0.05	11.662	20.861	9.688	48.906	36.353	38.126
	LOC108222648	peptide-N4-(N-acetyl-beta-glucosaminyl)asparagine amidase A-like	-1.37948	0.05	7.427	8.837	1.944	21.645	22.477	14.465
	LOC108199766	probable methyltransferase PMT5	-1.38344	0.01	7.534	9.898	8.778	25.201	25.077	22.341
	LOC108204671	alpha-glucosidase-like	-1.39021	0.01	4.87	9.609	17.303	36.739	22.701	28.586
	LOC108205026	probable inactive receptor kinase At1g48480	-1.39751	0.01	8.482	9.04	6.693	32.281	22.585	18.137
	LOC108199286	AUGMIN subunit 2-like	-1.39912	0.05	4.504	10.74	18.198	31.23	33.181	27.952
	LOC108200453	uncharacterized LOC108200453	-1.39989	0.05	2.259	8.582	10.467	23.847	17.989	18.319
	LOC108211482	omega-hydroxypalmitate O-feruloyl transferase	-1.40041	0.05	2.984	13.297	6.953	28.438	24.321	16.883
	LOC108200301	zinc finger protein-like 1 homolog	-1.40919	0.01	4.553	11.481	11.723	32.237	25.274	20.87
	LOC108218964	somatic embryogenesis receptor kinase 2	-1.41021	0.05	10.522	17.98	15.203	64.137	36.978	27.479
	LOC108215464	serine/arginine-rich SC35-like splicing factor SCL30	-1.41177	0.05	4.446	7.615	23.015	29.577	24.311	23.186
	LOC108200327	protein IQ-DOMAIN 31-like	-1.41396	0.05	3.576	10.867	4.83	27.449	19.324	11.957
	LOC108219750	thioredoxin reductase 1	-1.42106	0.05	11.833	13.301	4.324	32.063	23.944	38.314
	LOC108224489	malonyl-coenzyme A:anthocyanin 3-O-glucoside-6''-O-malonyltransferase-like	-1.42257	0.05	13.912	9.595	2.518	27.385	26.961	34.874
	LOC108223476	3beta-hydroxysteroid-dehydrogenase/decarboxylase	-1.43003	0.01	3.179	8.863	10.154	26.502	18.723	18.393
	LOC108224913	cytochrome P450 CYP736A12-like	-1.43056	0.01	5.062	8.658	4.398	20.864	15.581	18.301
	LOC108219856	histone H4	-1.44021	0.05	6.771	12.728	9.381	42.778	24.87	25.813
	LOC108210602	L-type lectin-domain containing receptor kinase VIII.1	-1.44994	0.01	4.415	7.561	5.372	24.349	14.26	14.642
	LOC108209593	arginase 1, mitochondrial	-1.45216	0.01	11.285	15.805	10.343	45.853	39.798	43.59
	LOC108204484	protein MARD1-like	-1.45261	0.05	8.096	6.106	6.838	21.095	16.703	25.641
	LOC108223368	syntaxin-121	-1.45341	0.01	9.872	12.211	7.753	45.564	20.802	28.911
	LOC108205794	perakine reductase-like	-1.45927	0.05	11.912	8.342	3.588	27.306	22.646	29.428
	LOC108214287	2-C-methyl-D-erythritol 4-phosphate cytidylyltransferase, chloroplastic	-1.46141	0.01	6.514	12.673	7.759	35.785	18.747	29.586
	LOC108220859	uncharacterized LOC108220859	-1.46283	0.05	4.226	12.878	2.697	23.878	17.318	24.328
	LOC108223866	uncharacterized LOC108223866	-1.47463	0.05	15.83	17.012	12.762	42.196	38.944	58.898
	LOC108209965	serine carboxypeptidase-like	-1.47708	0.05	1.335	9.487	14.457	40.208	23.416	17.554
	LOC108224504	U-box domain-containing protein 15	-1.48284	0.01	10.958	18.688	8.698	48.345	41.579	31.529
	LOC108202800	phosphoglycolate phosphatase 2	-1.49808	0.05	3.637	14.993	4.001	26.313	27.642	23.006
	LOC108194038	V-type proton ATPase subunit H-like	-1.50208	0.05	2.168	10.763	6.575	29.273	20.032	13.297
	LOC108200255	auxin-responsive protein IAA7-like	-1.50566	0.01	9.404	7.284	10.136	29.125	23.828	30.589
	LOC108210622	solute carrier family 35 member F1-like	-1.51172	0.01	2.974	7.115	6.882	24.034	13.31	16.081
	LOC108211165	cyclin-D3-1-like	-1.51358	0.05	6.417	13.198	4.467	39.728	20.266	21.868
	LOC108227918	gamma carbonic anhydrase 1, mitochondrial-like	-1.51764	0.05	6.105	4.263	8.376	27.993	22.023	11.313
	LOC108194245	transcription factor TCP20-like	-1.53246	0.05	7.048	21.913	4.045	39.773	38.926	35.499
	LOC108219463	probable polyol transporter 4	-1.53684	0.01	11.011	11.119	9.306	33.88	34.567	31.212
	LOC108211011	leucine-rich repeat extensin-like protein 6	-1.54782	0.01	10.576	3.83	7.947	22.201	24.635	30.023
	LOC108210923	PI-PLC X domain-containing protein At5g67130	-1.55217	0.01	4.92	12.761	7.811	39.997	22.255	19.766
	LOC108204708	transcription factor bHLH78-like	-1.55434	0.05	3.596	15.829	5.349	35.812	30.968	18.147
	LOC108193334	RNA-binding protein pno1-like	-1.55685	0.05	2.386	10.375	26.454	37.498	47.568	36.676
	LOC108193706	uncharacterized LOC108193706	-1.55974	0.05	1.246	8.377	5.775	25.659	13.581	14.103
	LOC108224307	uncharacterized LOC108224307	-1.57163	0.01	9.302	19.067	16.488	51.076	49.493	42.045
	LOC108222010	ethylene-responsive transcription factor TINY-like	-1.57846	0.05	3.117	8.272	7.072	33.451	13.947	17.23
	LOC108210643	very-long-chain enoyl-CoA reductase	-1.57848	0.01	5.143	19.662	10.398	52.16	35.838	31.533
	LOC108210669	probable malate dehydrogenase, glyoxysomal	-1.58924	0.01	6.841	14.401	9.199	40.891	25.061	35.994
	LOC108193273	probable inactive leucine-rich repeat receptor-like protein kinase At3g03770	-1.59121	0.01	5.297	8.074	1.941	23.208	17.499	15.446
	LOC108227998	beta-galactosidase 3-like	-1.59333	0.05	4.336	12.493	1.945	26.954	23.164	19.569
	LOC108197076	beta-1,4-mannosyl-glycoprotein 4-beta-N-acetylglucosaminyltransferase-like	-1.60144	0.01	4.235	11.738	2.834	33.565	18.195	18.334
	LOC108215157	uncharacterized LOC108215157	-1.61317	0.001	15.165	13.13	14.54	47.754	58.391	38.335
	LOC108200111	glucan endo-1,3-beta-glucosidase 13	-1.66302	0.01	4.003	18.537	8.96	43.347	35.697	30.309
	LOC108196434	lysophospholipid acyltransferase 1-like	-1.66617	0.01	1.668	6.581	12.286	22.158	28.555	20.459
	LOC108209287	hydroquinone glucosyltransferase	-1.68049	0.001	9.79	16.195	9.177	46.033	34	45.665
	LOC108220590	uncharacterized LOC108220590	-1.68759	0.01	6.043	5.713	5.631	28.986	13.866	21.817
	LOC108196795	BTB/POZ domain-containing protein At5g66560	-1.69701	0.01	6.73	7.583	2.875	32.728	17.735	17.931
	LOC108216183	L-Ala-D/L-amino acid epimerase-like	-1.69811	0.01	3.165	8.24	6.369	27.855	16.005	20.846
	LOC108214519	beta-galactosidase 5	-1.71477	0.01	11.372	12.828	7.554	58.512	42.293	22.628
	LOC108209726	probably inactive leucine-rich repeat receptor-like protein kinase At3g28040	-1.72327	0.01	2.454	12.728	9.563	41.914	24.516	26.359
	LOC108196286	probable RNA helicase SDE3	-1.72499	0.01	1.078	8.031	14.087	32.233	24.994	19.546
	LOC108213112	probable beta-D-xylosidase 7	-1.72577	0.05	15.699	5.536	2.93	48.906	38.574	28.27
	LOC108200698	uncharacterized LOC108200698	-1.72864	0.01	4.113	7.64	2.723	21.768	13.912	21.178
	LOC108192846	ultraviolet-B receptor UVR8-like	-1.73461	0.001	7.359	18.5	8.625	44.415	39.056	46.204
	LOC108225757	cyclin-D3-1-like	-1.75012	0.001	7.657	14.491	8.137	47.811	30.89	36.23
	LOC108228193	glutamate-1-semialdehyde 2,1-aminomutase, chloroplastic	-1.76926	0.001	6.229	7.995	16.633	35.618	37.049	37.777
	LOC108215799	cinnamoyl-CoA reductase 2-like	-1.78223	0.001	8.022	8.963	10.198	42.34	26.157	33.139
	LOC108219467	cysteine protease XCP1-like	-1.78503	0.05	4.377	12.497	2.246	41.916	18.689	25.133
	LOC108212195	amino acid permease 6-like	-1.78622	0.05	5.542	4.963	5.122	23.987	11.126	27.245
	LOC108215377	nematode resistance protein-like HSPRO2	-1.79309	0.01	1.673	3.53	11.189	26.955	15.697	21.08
	LOC108193017	uncharacterized LOC108193017	-1.80735	0.001	3.719	7.463	5.864	22.735	17.799	24.768
	LOC108219082	protein DETOXIFICATION 21-like	-1.81683	0.01	9.954	2.601	18.331	47.577	30.971	52.793
	LOC108210280	3-oxoacyl-[acyl-carrier-protein] synthase I, chloroplastic-like	-1.82063	0.01	1.501	13.298	4.206	31.263	27.357	23.534
	LOC108228191	trafficking protein particle complex subunit 1	-1.83986	0.001	4.532	14.518	7.376	41.343	36.122	30.583
	LOC108194256	transcription factor bHLH93-like	-1.84622	0.001	5.96	11.585	8.808	45.981	31.831	29.08
	LOC108210118	aspartic proteinase A1-like	-1.85038	0.05	11.172	11.117	5.16	67.571	33.672	25.546
	LOC108205703	lysophospholipid acyltransferase LPEAT2	-1.85255	0.05	2.045	7.099	3.77	28.358	12.604	14.825
	LOC108200716	AAA-ATPase At4g30250-like	-1.86271	0.001	4.154	7.6	4.149	27.03	16.076	23.75
	LOC108224596	protein ZINC INDUCED FACILITATOR-LIKE 1-like	-1.86786	0.01	8.235	3.656	2.84	33.119	17.627	19.301
	LOC108205179	ABC transporter G family member 25	-1.87405	0.05	4.651	5.905	5.278	19.449	27.977	16.963
	LOC108210002	uncharacterized LOC108210002	-1.87969	0.05	4.357	8.649	3.577	37.934	14.961	20.46
	LOC108211380	3-hydroxyisobutyryl-CoA hydrolase-like protein 5	-1.89209	0.01	1.341	9.36	7.226	28.171	24.016	24.63
	LOC108215670	hypothetical protein	-1.89773	0.01	1.015	10.845	3.308	32.157	26.12	14.525
	LOC108215837	heparanase-like protein 3	-1.94031	0.001	5.873	5.762	2.635	29.366	22.107	15.424
	LOC108197388	probable pyridoxal 5'-phosphate synthase subunit PDX1	-1.94227	0.001	7.114	7.906	15.155	39.201	41.458	44.863
	LOC108199221	cytochrome P450 76A2-like	-1.9542	0.001	4.227	9.161	6.634	38.616	30.029	27.308
	LOC108220055	probable galacturonosyltransferase-like 7	-1.95901	0.01	2.355	9.139	1.426	23.529	23.006	18.192
	LOC108223606	probable LRR receptor-like serine/threonine-protein kinase At4g26540	-1.96458	0.001	4.576	3.891	4.171	24.171	14.796	16.95
	LOC108224704	nucleobase-ascorbate transporter 2	-1.99238	0.001	6.038	8.19	4.321	35.41	26.932	23.824
	LOC108227972	polyubiquitin	-1.99902	0.001	3.075	5.947	4.897	22.85	22.747	17.026
	LOC108218479	thaumatin-like protein	-1.99918	0.001	3.785	7.149	5.519	37.73	27.469	13.993
	LOC108220264	uncharacterized LOC108220264	-2.00879	0.01	4.301	5.214	2.543	21.371	24.375	12.567
	LOC108207659	uncharacterized LOC108207659	-2.0103	0.01	9.953	15.44	5.062	39.065	47.293	59.066
	LOC108206598	lipase 1	-2.02455	0.001	2.768	4.473	4.729	23.522	18.288	12.256
	LOC108193777	probable receptor-like protein kinase At1g80640	-2.02875	0.001	3.151	6.579	2.309	28.593	18.821	12.552
	LOC108201159	protein NUCLEAR FUSION DEFECTIVE 4-like	-2.02993	0.001	6.992	2.359	3.744	22.997	23.333	20.747
	LOC108216622	NDR1/HIN1-Like protein 3	-2.03546	0.001	9.734	7.627	5.429	47.555	38.958	26.754
	LOC108211301	transcription factor bHLH93-like	-2.05925	0.01	4.482	16.804	1.99	57.61	34.457	38.791
	LOC108207976	vegetative cell wall protein gp1	-2.06177	0.001	4.008	10.695	5.34	42.268	35.214	24.407
	LOC108192622	cytochrome P450 83B1-like	-2.06551	0.05	7.133	11.279	1.329	42.227	17.22	30.178
	LOC108216569	UDP-glycosyltransferase 89B2-like	-2.06626	0.01	1.255	4.578	6.495	15.114	19.734	22.214
	LOC108209769	uncharacterized LOC108209769	-2.06853	0.001	0.903	5.678	4.769	24.644	13.803	16.933
	LOC108196468	probable serine/threonine-protein kinase At1g54610	-2.07381	0.05	3.259	8.421	5.262	43.029	17.003	24.086
	LOC108205016	low affinity sulfate transporter 3-like	-2.09577	0.05	4.853	9.131	8.816	25.514	45.444	35.027
	LOC108200651	coumaroyl-CoA:anthocyanidin 3-O-glucoside-6''-O-coumaroyltransferase 1-like	-2.12118	0.001	3.207	11.334	10.957	49.739	33.436	41.667
	LOC108214337	jacalin-related lectin 3	-2.12942	0.05	4.073	15.895	5.369	58.446	26.48	52.124
	LOC108200919	protein MIZU-KUSSEI 1-like	-2.13252	0.05	1.672	8.188	2.977	20.917	17.579	30.989
	LOC108193717	probable glycosyltransferase At5g11130	-2.13365	0.001	5.984	5.455	2.464	29.382	19.642	26.527
	LOC108220644	probable BOI-related E3 ubiquitin-protein ligase 3	-2.14127	0.001	3.164	15.423	8.227	47.807	49.893	39.683
	LOC108215999	cation/calcium exchanger 1	-2.1517	0.001	1.218	6.29	5.839	24.171	27.011	16.79
	LOC108192921	pectinesterase 1	-2.15266	0.01	5.27	9.519	5.93	58.016	26.58	25.552
	LOC108219950	L-type lectin-domain containing receptor kinase IV.2-like	-2.15817	0.001	6.513	6.513	7.438	38.225	28.416	34.967
	LOC108216511	G2/mitotic-specific cyclin S13-7-like	-2.16597	0.001	5.645	5.512	3.14	39.818	23.368	17.333
	LOC108193505	uncharacterized LOC108193505	-2.18437	0.01	4.783	3.893	2.672	35.149	21.027	10.682
	LOC108213355	probable L-type lectin-domain containing receptor kinase S.7	-2.19396	0.001	3.354	9.271	3.492	36.642	31.158	21.787
	LOC108203663	AAA-ATPase ASD, mitochondrial-like	-2.19733	0.05	3.549	1.781	5.773	25.847	9.481	28.052
	LOC108224526	cysteine protease XCP2-like	-2.20155	0.001	1.543	8.845	6.606	48.061	30.857	17.837
	LOC108198754	zinc finger protein 5	-2.22631	0.001	4.973	6.727	6.318	28.395	29.98	34.682
	LOC108203147	probable inactive receptor kinase At1g48480	-2.31841	0.001	3.83	3.14	1.594	27.654	16.621	11.942
	LOC108221074	omega-hydroxypalmitate O-feruloyl transferase-like	-2.34528	0.001	1.168	6.026	1.48	20.615	14.052	22.776
	LOC108215847	probable E3 ubiquitin-protein ligase LOG2	-2.37348	0.001	1.247	7.367	5.891	25.477	37.36	27.319
	LOC108204772	transcription factor DIVARICATA-like	-2.37862	0.001	1.507	7.028	12.78	34.136	54.91	38.682
	LOC108200939	protein FAM179B	-2.38204	0.001	10.732	5.104	3.05	73.594	43.223	26.23
	LOC108215437	expansin-A6-like	-2.38481	0.01	5.212	3.325	3.921	44.36	15.897	24.276
	LOC108216246	putative HVA22-like protein g	-2.39945	0.001	2.652	6.608	3.34	44.269	23.951	16.675
	LOC108205283	leucine-rich repeat receptor-like serine/threonine-protein kinase BAM3	-2.4322	0.001	2.135	5.307	4.095	34.678	20.191	17.411
	LOC108224697	serine carboxypeptidase-like 17	-2.50052	0.05	5.163	7.434	1.896	59.14	16.572	40.5
	LOC108205659	probable glycerol-3-phosphate acyltransferase 8	-2.50391	0.001	1.915	5.911	1.703	27.061	15.31	28.132
	LOC108227431	cytochrome P450 98A2	-2.50447	0.001	7.24	7.124	6.314	53.707	33.404	48.188
	LOC108204341	ethylene response sensor 1	-2.51703	0.05	8.177	6.365	5.94	80.764	26.669	39.634
	LOC108220908	uncharacterized LOC108220908	-2.52186	0.001	6.736	6.619	3.307	35.911	34.448	47.307
	LOC108194302	proline-rich 33 kDa extensin-related protein-like	-2.52983	0.01	3.693	10.23	2.749	47.841	26.641	54.516
	LOC108211268	protein NRT1/ PTR FAMILY 5.6-like	-2.56645	0.05	3.736	6.279	3.392	40.846	15.572	43.429
	LOC108205918	probable LRR receptor-like serine/threonine-protein kinase At1g34110	-2.67863	0.01	2.938	5.319	1.638	47.106	20.945	17.976
	LOC108204676	uncharacterized LOC108204676	-2.6821	0.001	2.212	3.7	3.109	31.317	20.094	18.982
	LOC108223132	shikimate O-hydroxycinnamoyltransferase-like	-2.68474	0.001	4.258	5.166	11.141	41.863	66.368	41.923
	LOC108215276	cytochrome P450 86A22-like	-2.70686	0.001	2.73	5.147	2.064	25.076	19.896	36.468
	LOC108197733	aldo-keto reductase family 4 member C9-like	-2.74138	0.001	4.569	5.005	4.5	36.502	32.854	39.892
	LOC108216647	probable arabinose 5-phosphate isomerase	-2.75646	0.001	6.107	6.025	4.569	65.21	28.178	47.43
	LOC108225717	probable LRR receptor-like serine/threonine-protein kinase At4g37250	-2.79154	0.01	3.055	6.164	1.78	59.156	27.223	19.542
	LOC108200300	probable leucine-rich repeat receptor-like protein kinase At1g68400	-2.81657	0.01	2.808	2.499	3.12	41.39	16.94	16.322
	LOC108193647	bifunctional epoxide hydrolase 2-like	-2.85749	0.001	4.195	1.062	2.048	28.748	17.901	27.825
	LOC108223759	glucomannan 4-beta-mannosyltransferase 2-like	-2.8604	0.001	2.305	9.055	5.259	79.018	39.388	34.775
	LOC108214352	glycerol-3-phosphate dehydrogenase [NAD(+)]-like	-2.88787	0.001	1.14	3.825	2.924	35.066	20.033	17.489
	LOC108216628	phospholipase ABHD3-like	-2.97945	0.01	1.386	3.839	1.838	33.443	11.862	29.334
	LOC108225052	pectate lyase-like	-3.05611	0.001	2.772	3.213	1.607	41.115	20.979	21.629
	LOC108228017	NADPH--cytochrome P450 reductase	-3.18729	0.001	2.664	4.542	2.897	51.188	30.144	29.855
	LOC108204705	uncharacterized LOC108204705	-3.32797	0.05	3.737	2.66	2.126	40.544	12.751	82.445
	LOC108209512	serine hydroxymethyltransferase 3, chloroplastic-like	-3.36808	0.01	0.934	4.345	2.433	25.413	49.458	33.197
	LOC108203083	3-ketoacyl-CoA synthase 11	-3.50454	0.001	2.972	5.113	3.108	59.685	40.803	53.481
	LOC108199845	probably inactive leucine-rich repeat receptor-like protein kinase IMK2	-3.65153	0.01	2.915	1.762	0.952	84.651	19.499	20.149
	LOC108192978	polyphenol oxidase I, chloroplastic-like	-4.18804	0.001	1.463	1.451	2.597	67.795	18.663	56.306
11	LOC108219733	photosynthetic NDH subunit of subcomplex B 1, chloroplastic	4.415	0.001	16.128	18.637	45.685	0.627	1.186	0.716
	LOC108205630	chloroplast stem-loop binding protein of 41 kDa b, chloroplastic	4.34692	0.001	45.874	8.886	41.842	0.779	1.289	0.779
	LOC108223457	rhodanese-like domain-containing protein 9, chloroplastic	3.71169	0.001	34.343	20.279	50.828	3.604	1.362	1.473
	LOC108222923	chloroplast stem-loop binding protein of 41 kDa a, chloroplastic	3.53853	0.001	40.573	10.243	19.318	1.385	1.721	1.392
	LOC108220074	uncharacterized LOC108220074	3.43166	0.001	18.126	37.817	26.877	1.658	3.157	0.926
	LOC108205750	tetraketide alpha-pyrone reductase 2	3.3859	0.05	17.266	4.297	51.016	2.083	0.807	0.754
	LOC108216106	uncharacterized LOC108216106	3.36461	0.001	52.041	0.997	19.854	1.126	1.15	1.096
	LOC108211456	uncharacterized LOC108211456	3.17506	0.001	23.302	14.614	55.363	3.954	1.411	2.517
	LOC108195206	transcription factor HBP-1b(c38)-like	3.17094	0.001	19.601	27.864	42.336	1.795	3.036	3.264
	LOC108214397	heat stress transcription factor A-3-like	3.11885	0.001	17.056	15.506	26.399	2.534	0.645	2.429
	LOC108196616	probable plastid-lipid-associated protein 12, chloroplastic	3.07346	0.001	23.87	23.504	41.332	2.317	4.428	1.425
	LOC108209609	ribosomal L1 domain-containing protein 1-like	3.02135	0.001	32.163	17.071	25.742	3.797	2.881	1.869
	LOC108220519	GPI-anchored protein LORELEI-like	2.98842	0.001	38.835	15.023	26.123	2.958	1.83	3.597
	LOC108208055	uncharacterized LOC108208055	2.97906	0.001	20.557	26.671	34.506	4.56	1.815	2.77
	LOC108202567	tonoplast dicarboxylate transporter-like	2.95582	0.001	26.413	17.02	26.664	3.149	1.331	3.429
	LOC108201563	TMV resistance protein N-like	2.91644	0.001	11.882	13.696	29.184	1.583	0.961	3.054
	LOC108214838	serine protease SPPA, chloroplastic	2.9144	0.001	21.161	10.623	26.033	3.187	2.024	1.584
	LOC108215386	fe-S cluster assembly factor HCF101, chloroplastic	2.81173	0.001	20.436	13.923	24.448	3.41	2.777	1.024
	LOC108202495	disease resistance protein TAO1-like	2.80941	0.001	11.169	13.705	31.472	1.876	2.08	2.523
	LOC108228179	uncharacterized LOC108228179	2.80829	0.001	45.545	13.324	19.883	0.66	3.738	2.771
	LOC108200313	bZIP transcription factor 53-like	2.76037	0.001	8.711	40.705	20.357	4.132	1.71	2.214
	LOC108200126	uncharacterized LOC108200126	2.72301	0.001	23.646	18.828	51.513	7.558	1.929	2.383
	LOC108219468	increased DNA methylation 3	2.69646	0.001	10.293	37.519	38.6	1.259	3.241	4.72
	LOC108223098	probable mediator of RNA polymerase II transcription subunit 36b	2.69624	0.001	21.403	5.846	29.667	1.456	1.048	4.005
	LOC108209975	B-box zinc finger protein 22-like	2.62371	0.001	8.507	22.27	53.481	0.869	2.657	4.809
	LOC108220496	uncharacterized LOC108220496	2.61017	0.001	2.369	32.681	30.356	2.624	2.914	1.496
	LOC108200580	high affinity nitrate transporter 2.5-like	2.59036	0.001	19.656	17.885	24.787	1.643	2.64	4.294
	LOC108209698	salutaridine reductase-like	2.53844	0.001	5.95	21.29	35.105	6.157	1.581	2.089
	LOC108216683	uncharacterized LOC108216683	2.48401	0.001	26.053	50.994	32.762	8.191	7.04	1.872
	LOC108214196	4-alpha-glucanotransferase, chloroplastic/amyloplastic	2.3956	0.001	16.931	20.09	39.57	5.673	4.167	3.411
	LOC108227467	pentatricopeptide repeat-containing protein MRL1, chloroplastic	2.38419	0.01	22.748	10.168	33.046	5.269	3.085	2.955
	LOC108204368	CRM-domain containing factor CFM2, chloroplastic	2.31871	0.01	33.76	12.624	33.355	7.879	3.653	3.156
	LOC108194192	uncharacterized LOC108194192	2.20431	0.001	37.554	22.142	27.907	3.832	8.547	4.471
	LOC108196459	serine hydroxymethyltransferase 1, mitochondrial	2.18457	0.001	13.498	18.573	24.925	2.509	2.927	5.353
	LOC108205786	uncharacterized LOC108205786	2.1675	0.001	11.826	39.52	26.412	5.249	6.144	3.255
	LOC108205613	uncharacterized LOC108205613	2.16448	0.001	36.619	29.588	41.135	6.81	2.531	11.3
	LOC108210185	malate dehydrogenase [NADP], chloroplastic	2.1616	0.001	17.91	27.93	28.163	7.005	6.01	1.875
	LOC108193515	meiotic nuclear division protein 1 homolog	2.15331	0.001	17.93	24.024	43.325	5.52	2.251	8.282
	LOC108196471	uncharacterized LOC108196471	2.10267	0.001	13.49	13.339	32.576	4.332	5.557	1.7
	LOC108218767	probable WRKY transcription factor 3	2.04171	0.001	23.319	17.68	48.235	6.192	3.819	7.325
	LOC108199550	TMV resistance protein N-like	2.03317	0.001	16.576	16.375	35.869	9.824	3.275	1.699
	LOC108209278	cysteine synthase-like	2.02335	0.001	10.249	25.611	22.284	7.831	2.801	2.023
	LOC108210519	heat shock protein 83-like	1.98567	0.001	15.324	19.378	28.493	9.702	1.672	3.059
	LOC108225044	stem-specific protein TSJT1-like	1.98357	0.05	13.54	20.979	58.479	9.264	7.245	3.09
	LOC108222055	U11/U12 small nuclear ribonucleoprotein 25 kDa protein	1.94294	0.01	14.217	13.375	33.273	3.768	2.254	5.988
	LOC108209272	uncharacterized LOC108209272	1.93657	0.001	25.025	29.913	26.647	3.767	8.939	6.012
	LOC108224475	putative F-box protein PP2-B12	1.92439	0.001	32.369	25.169	27.614	6.444	12.752	8.003
	LOC108220499	lanC-like protein GCR2	1.92183	0.001	15.167	24.182	52.201	6.75	8.458	5.761
	LOC108224246	beta-carotene 3-hydroxylase, chloroplastic-like	1.8862	0.05	12.985	11.72	39.798	4.045	6.372	3.935
	LOC108196003	uncharacterized LOC108196003	1.841	0.05	19.582	22.55	24.95	0.451	6.361	0.629
	LOC108223922	uncharacterized LOC108223922	1.83641	0.001	27.01	33.071	43.093	11.291	7.403	9.41
	LOC108206456	primase homolog protein	1.8347	0.05	7.873	12.217	37.103	7.405	1.522	2.275
	LOC108214061	ATPase family AAA domain-containing protein 1-B-like	1.80809	0.01	10.405	32.678	34.446	7.853	5.362	6.556
	LOC108227966	uncharacterized LOC108227966	1.78672	0.01	18.042	27.656	19.974	7.337	6.751	4.07
	LOC108202596	ABC transporter F family member 5	1.77967	0.001	29.094	18.333	41.442	12.047	6.378	6.653
	LOC108199557	phosphopantothenate--cysteine ligase 1-like	1.75703	0.01	10.625	25.001	33.027	5.222	1.981	8.616
	LOC108204329	30S ribosomal protein S1, chloroplastic-like	1.73454	0.01	10.698	23.408	54.626	11.348	6.243	4.511
	LOC108209057	uncharacterized LOC108209057	1.72674	0.01	14.686	12.468	27.023	8.372	3.896	18.919
	LOC108199885	probable acyl-activating enzyme 16, chloroplastic	1.72326	0.001	23.933	23.872	42.838	5.8	9.838	8.865
	LOC108214833	5-methyltetrahydropteroyltriglutamate--homocysteine methyltransferase 1-like	1.72204	0.01	18.913	13.915	28.999	5.06	8.166	3.582
	LOC108218526	acylphosphatase-like	1.71021	0.05	33.634	12.979	34.807	1.462	7.201	10.45
	LOC108223928	asparagine--tRNA ligase, chloroplastic/mitochondrial-like	1.70661	0.001	24.071	44.902	32.922	7.292	10.315	10.855
	LOC108195851	nuclear pore complex protein NUP214	1.68944	0.001	19.606	12.903	23.378	8.861	3.607	4.527
	LOC108196368	uncharacterized LOC108196368	1.68121	0.05	22.471	16.56	50.306	7.087	6.725	10.412
	LOC108194709	GTP-binding protein OBGC, chloroplastic	1.67904	0.05	40.76	20.714	43.065	11.288	11.291	8.976
	LOC108213173	ethylene-responsive transcription factor RAP2-1-like	1.67562	0.05	22.495	14.51	34.347	3.517	10.183	4.919
	LOC108224811	uncharacterized LOC108224811	1.6739	0.05	4.09	28.494	27.41	7.149	2.573	5.727
	LOC108220097	putative uridine kinase C227.14	1.66992	0.01	19.087	10.759	27.13	5.604	5.314	4.481
	LOC108204246	MACPF domain-containing protein At1g14780-like	1.631	0.01	18.556	22.91	42.248	7.262	7.952	9.78
	LOC108214422	uncharacterized protein sll1770	1.60458	0.001	19.59	21.456	36.189	9.991	8.169	5.944
	LOC108224403	uncharacterized LOC108224403	1.60432	0.01	19.481	17.049	24.326	5.168	7.212	6.148
	LOC108227257	chaperone protein ClpB4, mitochondrial	1.58831	0.01	16.439	24.129	49.854	14.116	4.849	8.518
	LOC108204177	RRP12-like protein	1.58658	0.05	31.314	15.202	23.461	10.25	6.245	6.576
	LOC108215260	uncharacterized LOC108215260	1.58306	0.01	17.26	23.028	27.217	8.653	3.248	9.066
	LOC108192289	3-hydroxyisobutyryl-CoA hydrolase-like protein 1, mitochondrial	1.57521	0.01	11.224	15.282	29.276	5.86	4.971	6.151
	LOC108219799	probable alpha-amylase 2	1.55819	0.01	29.07	34.825	40.027	6.673	9.912	13.859
	LOC108196634	DEAD-box ATP-dependent RNA helicase 28	1.55144	0.01	33.374	20.326	46.021	15.359	6.674	10.679
	LOC108214889	serine/threonine-protein phosphatase 7 long form homolog	1.54441	0.01	15.966	31.512	38.33	9.93	9.961	7.798
	LOC108215681	uncharacterized LOC108215681	1.52732	0.01	13.163	24.913	23.477	11.061	6.38	3.049
	LOC108215444	homeobox protein knotted-1-like LET12	1.5214	0.01	33.26	33.178	37.48	6.911	12.566	13.784
	LOC108198145	uncharacterized LOC108198145	1.51868	0.05	11.26	20.713	45.73	12.002	6.221	6.055
	LOC108200123	30S ribosomal protein 3-1, chloroplastic-like	1.49896	0.05	14.934	33.869	28.304	10.037	7.93	8.09
	LOC108216801	high mobility group B protein 10	1.49506	0.01	14.62	27.041	37.412	7.208	6.636	6.683
	XLOC_019742		1.49185	0.05	8.191	23.161	32.536	7.24	7.439	5.011
	LOC108193276	protein ABHD17C	1.48812	0.01	17.587	17.734	26.574	6.324	8.205	6.449
	LOC108218952	nitrate reductase [NADH]-like	1.48549	0.01	26.75	17.045	33.364	12.018	8.559	6.694
	LOC108193852	uncharacterized LOC108193852	1.48033	0.05	7.593	27.753	29.377	8.735	7.566	4.274
	LOC108220993	uncharacterized LOC108220993	1.47381	0.05	6.793	20.851	28.4	4.017	7.544	5.121
	LOC108211834	serpin-ZX-like	1.46446	0.05	10.512	51.622	31.939	4.595	13.483	19.485
	LOC108199484	non-functional NADPH-dependent codeinone reductase 2-like	1.45516	0.05	21.285	11.003	25.684	8.271	7.215	13.968
	LOC108210172	pentatricopeptide repeat-containing protein At3g25210, mitochondrial	1.45236	0.05	11.354	33.799	37.371	8.571	9.236	8.847
	LOC108227994	protein LNK1-like	1.43803	0.01	30.227	23.405	37.2	11.395	10.186	9.047
	LOC108202805	uncharacterized LOC108202805	1.43563	0.01	13.406	16.27	26.005	6.559	5.26	7.466
	LOC108225509	ISWI chromatin-remodeling complex ATPase CHR11-like	1.41932	0.01	11.93	17.047	25.831	10.84	3.798	4.936
	LOC108210617	protein PTST, chloroplastic	1.41503	0.01	19.473	28.418	37.8	10.192	8.866	10.438
	LOC108201718	protein NRT1/ PTR FAMILY 5.10-like	1.4044	0.05	19.806	14.862	26.245	2.693	10.368	6.617
	LOC108197641	uncharacterized LOC108197641	1.40296	0.05	15.569	27.669	31.019	9.729	7.472	8.635
	LOC108209262	cyclic nucleotide-gated ion channel 1	1.39655	0.01	25.062	16.799	29.737	13.54	5.603	7.969
	LOC108208800	protein SCAR3-like	1.39323	0.01	27.734	21.322	35.734	12.492	6.441	10.615
	LOC108217066	RNA polymerase sigma factor sigB-like	1.36307	0.05	22.502	20.845	44.98	12.293	12.843	6.173
	LOC108202768	transcription initiation factor TFIID subunit 2	1.35344	0.01	18.868	14.006	30.392	11.316	5.901	6.878
	LOC108200124	uncharacterized LOC108200124	1.34467	0.05	10.009	25.841	35.246	12.547	7.625	5.747
	LOC108204589	trihelix transcription factor GT-2-like	1.34259	0.01	19.354	29.641	46.013	12.713	11.954	10.825
	LOC108227525	nucleobase-ascorbate transporter 3-like	1.33427	0.05	10.622	16.359	25.585	7.43	8.859	3.354
	LOC108215409	microfibrillar-associated protein 1-like	1.33148	0.05	12.59	26.046	26.635	11.961	6.253	6.932
	LOC108216158	lipid droplet-associated hydrolase	1.32816	0.05	18.307	20.934	24.211	6.667	7.82	9.421
	LOC108219256	NO-associated protein 1, chloroplastic/mitochondrial	1.32306	0.01	28.624	30.143	37.346	12.817	13.82	10.712
	LOC108219692	transcription termination factor MTERF4, chloroplastic	1.30585	0.05	21.548	32.329	38.813	9.589	13.803	11.784
	LOC108226472	U6 snRNA phosphodiesterase	1.2931	0.05	13.476	20.887	29.754	8.127	9.653	6.847
	LOC108192809	pentatricopeptide repeat-containing protein At3g59040	1.28667	0.05	13.795	23.857	31.416	9.33	9.806	7.019
	LOC108196144	helicase-like transcription factor CHR28	1.28338	0.05	21.403	16.39	31.606	11.938	6.18	9.608
	LOC108197254	pentatricopeptide repeat-containing protein At3g06430, chloroplastic	1.27758	0.05	25.335	19.72	29.982	10.137	11.759	7.999
	LOC108209354	uncharacterized LOC108209354	1.27093	0.05	29.689	23.056	38.369	14.478	12.831	9.62
	LOC108196370	nuclear pore complex protein NUP98A-like	1.26418	0.05	19.391	17.308	28.983	12.282	8.91	6
	LOC108208829	regulator of nonsense transcripts UPF3-like	1.25803	0.05	28.125	20.126	20.407	13.427	6.826	10.506
	LOC108227678	threonine--tRNA ligase, chloroplastic/mitochondrial 2	1.24362	0.05	24.768	20.499	33.105	13.833	10.964	7.872
	LOC108215215	preprotein translocase subunit SCY1, chloroplastic	1.23956	0.05	13.572	23.482	31.761	12.382	8.132	7.452
	LOC108209457	DEAD-box ATP-dependent RNA helicase 31-like	1.22689	0.05	29.904	21.08	41.051	18.072	8.162	12.944
	LOC108228059	F-box/LRR-repeat MAX2 homolog A	1.21452	0.05	14.855	22.194	38.276	10.735	11.019	9.091
	LOC108218993	4-hydroxy-3-methylbut-2-en-1-yl diphosphate synthase (ferredoxin), chloroplastic-like	1.20459	0.05	26.824	24.63	25.128	14.625	10.604	8.116
	LOC108224304	protein PHLOEM PROTEIN 2-LIKE A10-like	1.19178	0.05	17.886	21.224	45.051	16.122	8.574	10.557
	LOC108196253	nuclear pore complex protein NUP107	1.19114	0.05	17.128	26.358	35.701	15.057	10.308	8.033
	LOC108197975	RNA polymerase II C-terminal domain phosphatase-like 1	1.18537	0.05	30.255	22.04	36.233	15.281	12.199	11.116
	LOC108224138	probable solanesyl-diphosphate synthase 3, chloroplastic	1.17992	0.05	22.059	17.811	36.156	11.265	12.264	8.447
	LOC108214754	peptidyl-prolyl cis-trans isomerase CYP38, chloroplastic	1.17769	0.05	15.772	12.962	29.324	11.784	5.742	7.247
	LOC108205268	histone-lysine N-methyltransferase, H3 lysine-9 specific SUVH4-like	1.16755	0.05	14.587	17.28	26.265	10.5	6.607	8.244
	LOC108216036	transcription factor MYB86-like	1.16632	0.05	13.284	23.223	27.675	11.596	9.667	6.2
	LOC108209032	mediator of RNA polymerase II transcription subunit 15a-like	1.1557	0.05	22.623	15.862	20.013	12.403	5.109	8.821
	LOC108224656	F-box/kelch-repeat protein SKIP6-like	1.15531	0.05	27.931	36.565	29.6	15.648	16.107	12.028
	LOC108219390	arginine/serine-rich coiled-coil protein 2	1.15339	0.05	28.852	27.396	24.665	14.907	10.03	11.559
	LOC108197454	protein RETICULATA-RELATED 3, chloroplastic-like	1.15176	0.05	22.007	18.18	18.964	11.504	6.02	9.53
	LOC108203099	trihelix transcription factor GT-2-like	1.15162	0.05	15.16	37.463	33.337	12.816	11.124	12.663
	LOC108196135	protein CobW-like	1.14242	0.05	30.107	14.936	24.306	9.244	9.077	8.687
	LOC108224097	uncharacterized LOC108224097	1.13699	0.05	21.347	26.807	38.992	16.834	12.46	8.98
	LOC108210048	mediator-associated protein 1-like	1.13656	0.05	21.242	29.041	31.309	16.976	11.044	9.163
	LOC108228060	acetolactate synthase 2, chloroplastic-like	1.11162	0.05	28.041	20.498	21.768	10.883	10.622	11.376
	LOC108204704	carboxyl-terminal-processing peptidase 2, chloroplastic	1.10968	0.05	25.496	18.736	23.602	11.284	11.87	8.345
	LOC108199677	homeobox-DDT domain protein RLT3	1.08422	0.05	25.715	20.167	23.86	12.78	11.583	8.521
	LOC108214584	sorting nexin 2B-like	1.06594	0.05	28.738	29.603	34.031	19.626	13.149	12.103
	LOC108223505	auxin response factor 18-like	1.04316	0.05	20.629	26.606	38.589	17.771	11.571	11.989
	LOC108192898	protein TPR2-like	1.03653	0.05	28.29	21.164	34.39	17.163	12.574	11.42
12	LOC108223513	chlorophyll a-b binding protein 37, chloroplastic	7.13209	0.001	2225.97	404.07	1820.66	7.196	4.563	5.021
	LOC108193402	chlorophyll a-b binding protein, chloroplastic-like	7.1228	0.001	1483.7	487.067	1013.77	3.151	5.964	3.087
	LOC108196996	chlorophyll a-b binding protein CP29.2, chloroplastic	6.39665	0.001	1640.13	730.36	1097.03	12.313	11.179	5.291
	LOC108218282	chlorophyll a-b binding protein 8, chloroplastic	5.66722	0.001	1320.26	822.027	1595.01	14.959	26.237	9.028
	LOC108200170	chlorophyll a-b binding protein 7, chloroplastic	5.15228	0.001	811.555	805.047	1455.14	21.184	28.057	4.068
	rrn26	26S ribosomal RNA	4.18092	0.001	2254.99	289.93	1634.49	58.254	4.843	48.898
	LOC108222802	photosystem II reaction center W protein, chloroplastic-like	3.66353	0.001	1782.86	1620.93	1572	140.103	149.466	54.613
	LOC108215374	xyloglucan endotransglucosylase/hydrolase protein 9-like	2.61099	0.001	1501.7	1756.02	2450.6	129.194	314.792	321.745
	LOC108205217	cold-regulated 413 plasma membrane protein 1-like	2.06687	0.001	1093.44	976.443	952.619	106.734	265.054	252.752
13	LOC108205119	FAD-dependent urate hydroxylase-like	4.44652	0.001	24.261	85.002	62.522	1.931	1.924	1.919
	LOC108198981	uncharacterized LOC108198981	3.93229	0.001	17.154	119.942	66.382	6.244	3.421	2.633
	LOC108219603	codeine O-demethylase-like	3.84469	0.001	56.243	117.397	39.984	3.607	4.808	3.124
	LOC108211294	uncharacterized LOC108211294	2.81065	0.001	67.318	85.594	43.601	8.419	7.268	9.547
	nad3	NADH dehydrogenase subunit 3	2.67348	0.001	42.507	94.869	41.614	11	3.307	10.004
	nad3	NADH dehydrogenase subunit 3	2.67348	0.001	42.507	94.869	41.614	11	3.307	10.004
	nad3	NADH dehydrogenase subunit 3	2.67348	0.001	42.507	94.869	41.614	11	3.307	10.004
	LOC108211799	uncharacterized LOC108211799	2.49807	0.001	38.918	92.113	63.567	5.323	11.934	11.338
	LOC108197525	glucan endo-1,3-beta-glucosidase 14-like	2.41565	0.001	22.667	83.785	67.706	12.349	9.922	5.104
	LOC108202996	myb-related protein 3R-1-like	2.1256	0.001	33.431	69.68	57.914	13.478	7.889	12.959
	LOC108197052	high-light-induced protein, chloroplastic	1.6479	0.05	22.217	92.241	59.144	24.319	17.183	7.429
	LOC108224937	uncharacterized LOC108224937	1.62925	0.05	45.882	67.578	19.02	8.748	20.091	7.841
	LOC108193405	ferredoxin-2	1.58921	0.01	35.04	92.646	60.4	17.554	25.54	12.985
	LOC108202638	uncharacterized LOC108202638	1.47018	0.05	30.331	87.483	57.056	24.278	17.619	15.55
	LOC108203599	protein starmaker-like	1.28903	0.05	48.337	82.298	43.882	25.908	21.064	22.09
14	XLOC_009094		2.48583	0.05	32012.8	857.732	5806.94	454.251	527.858	918.902
15	LOC108202250	protein TONSOKU	4.59268	0.001	80.241	52.098	97.216	4.474	2.173	1.399
	LOC108202483	UPF0603 protein At1g54780, chloroplastic	2.49569	0.001	47.022	60.569	67.568	12.574	11.492	4.007
	XLOC_038077		2.17226	0.05	88.478	23.972	80.114	2.131	8.233	19.586
	LOC108227497	two pore calcium channel protein 1A-like	2.00107	0.001	60.693	66.038	42.969	18.914	13.089	9.489
	LOC108210392	serine--tRNA ligase-like	1.90385	0.001	72.671	62.786	86.848	23.751	12.234	21.52
	LOC108227721	GTP-binding protein TypA/BipA homolog	1.51563	0.01	47.48	48.571	70.085	22.821	19.113	15.144
	LOC108211516	17.3 kDa class I heat shock protein-like	1.51258	0.01	48.819	57.981	65.166	16.588	19.548	22.29
	LOC108193833	chlorophyllase-2, chloroplastic	1.49018	0.01	62.663	56.576	59.734	20.908	20.875	21.683
	LOC108220599	CASP-like protein 5A2	1.36928	0.01	80.688	67.468	69.342	22.655	28.876	30.371
	LOC108202419	titin	1.35025	0.05	59.652	57.53	65.667	32.028	16.139	22.728
	LOC108219971	F-box/kelch-repeat protein At2g44130-like	1.32474	0.01	81.095	51.64	74.64	36.697	25.719	21.959
	LOC108218894	ATP-dependent zinc metalloprotease FTSH, chloroplastic	1.28324	0.05	71.399	44.442	70.546	24.85	31.034	19.105
	LOC108211151	lon protease 2-like	1.28062	0.05	65.176	58.784	75.453	26.737	27.934	26.432
	LOC108204456	pre-mRNA-splicing factor CWC22 homolog	1.26388	0.05	51.752	67.854	41.876	26.523	23.118	17.618
	LOC108227532	glyoxylate/succinic semialdehyde reductase 1	1.19804	0.05	59.498	60.171	48.555	26.841	28.84	17.63
	LOC108210735	ribonucleoside-diphosphate reductase small chain	1.15155	0.05	62.691	82.994	41.122	35.298	30.492	19.892
	LOC108227398	DEAD-box ATP-dependent RNA helicase 7-like	1.14029	0.05	60.694	52.914	66.481	37.131	18.515	27.28
16	LOC108209177	uncharacterized LOC108209177	3.3441	0.001	57.728	70.85	109.447	12.063	4.283	2.842
	LOC108214656	phytoene synthase 2, chloroplastic	3.01151	0.001	28.342	66.757	113.638	9.805	7.424	3.632
	LOC108193400	ferritin, chloroplastic	2.94806	0.001	68.163	60.614	116.655	12.396	7.087	9.742
	LOC108209385	protein plastid transcriptionally active 16, chloroplastic-like	2.57654	0.001	50.118	67.881	105.114	14.938	12.71	3.707
	LOC108211512	protein LHCP TRANSLOCATION DEFECT	2.46088	0.001	65.869	75.615	106.201	9.72	18.009	11.742
	LOC108210271	uncharacterized LOC108210271	2.3214	0.001	42.159	94.917	136.022	17.45	15.174	15.689
	LOC108204978	PGR5-like protein 1A, chloroplastic	2.28941	0.001	65.263	93.106	112.427	19.143	21.347	10.62
	LOC108223597	uncharacterized LOC108223597	1.92365	0.001	39.684	65.131	98.768	21.585	15.814	13.145
	LOC108193155	magnesium protoporphyrin IX methyltransferase, chloroplastic	1.92138	0.001	48.183	53.763	117.297	22.843	21.36	8.395
	LOC108209647	flagellar radial spoke protein 5	1.80494	0.001	40.404	94.846	131.57	23.155	25.333	20.7
	LOC108220846	codeine O-demethylase-like	1.79854	0.05	17.03	86.004	87.038	5.591	24.573	8.157
	LOC108214951	TBC1 domain family member 15-like	1.74339	0.001	38.403	48.801	108.67	22.71	15.885	15.103
	LOC108195894	protein EXECUTER 2, chloroplastic	1.66141	0.01	65.212	57.751	130.916	33.482	22.965	19.7
	LOC108205642	esterase AGAP003155-like	1.63271	0.01	43.63	57.526	90.841	17.809	20.062	21.758
	LOC108192515	LOB domain-containing protein 41-like	1.56144	0.01	73.049	73.426	93.506	36.004	28.783	16.149
	LOC108196922	30S ribosomal protein S1, chloroplastic-like	1.52695	0.01	53.017	85.559	132.936	29.635	38.623	17.375
	LOC108228008	4-hydroxy-3-methylbut-2-enyl diphosphate reductase, chloroplastic-like	1.49791	0.01	49.909	71.796	109.438	29.084	28.909	19.514
	LOC108219287	porphobilinogen deaminase, chloroplastic	1.48542	0.01	49.885	72.542	131.639	33.806	31.329	18.662
	LOC108197220	probable membrane-associated kinase regulator 1	1.43549	0.01	69.929	80.637	124.433	45.668	32.596	22.702
	LOC108216557	protein PLASTID TRANSCRIPTIONALLY ACTIVE 7	1.43145	0.01	62.216	66.171	106.975	20.656	32.673	27.968
	LOC108210524	ribosome biogenesis protein WDR12 homolog	1.4247	0.01	44.084	65.262	86.616	26.387	27.981	14.55
	LOC108194029	chaperone protein dnaJ 8, chloroplastic	1.35906	0.01	71.62	69.785	98.121	35.182	36.017	18.975
	LOC108197185	protein HHL1, chloroplastic	1.33904	0.05	52.648	72.513	90.267	22.398	35.215	22.14
	LOC108225564	allantoate deiminase	1.29257	0.05	38.346	80.185	100.814	25.099	30.992	25.251
	LOC108201177	probable plastid-lipid-associated protein 8, chloroplastic	1.21002	0.05	33.37	63.361	105.706	43.977	16.861	22.008
	LOC108196197	sulfite reductase 1 [ferredoxin], chloroplastic-like	1.18087	0.05	44.681	80.217	99.976	35.493	34.809	23.462
	LOC108206083	inositol transporter 4-like	1.1776	0.05	49.145	71.235	86.245	31.876	40.085	13.633
	LOC108197489	agamous-like MADS-box protein AGL27	1.14499	0.05	64.695	59.587	119.437	35.766	26.538	44.125
17	LOC108213153	protein DEFECTIVE IN MERISTEM SILENCING 3-like	4.8984	0.001	20.568	30.45	56.665	1.342	0.703	0.82
	LOC108226082	uncharacterized LOC108226082	3.45805	0.001	15.213	37.144	69.523	2.415	3.111	2.473
	LOC108219534	thylakoid lumenal 29 kDa protein, chloroplastic	3.33664	0.001	31.386	23.828	68.06	4.193	3.14	2.864
	XLOC_031543		3.33625	0.001	25.837	30.813	57.526	2.868	2.423	3.732
	LOC108215980	uncharacterized LOC108215980	3.30623	0.001	31.092	30.108	62.933	3.792	4.559	0.915
	LOC108210441	probable 2-oxoglutarate-dependent dioxygenase At3g49630	3.21319	0.001	12.12	59.809	58.992	3.368	4.887	1.093
	LOC108206228	FK506-binding protein 4-like	2.86878	0.001	27.741	60.865	48.118	8.055	5.05	3.256
	LOC108214963	uncharacterized LOC108214963	2.56906	0.001	26.792	25.198	65.757	7.323	4.079	5.843
	XLOC_022818		2.53366	0.001	11.041	49.163	43.317	4.535	2.008	8.321
	LOC108226258	transcription termination factor MTEF1, chloroplastic	2.46412	0.001	21.187	29.384	64.87	7.55	5.742	4.541
	LOC108224063	fructose-1,6-bisphosphatase, cytosolic	2.43286	0.001	26.88	56.372	69.21	9.261	8.319	7.67
	LOC108224748	nuclear transcription factor Y subunit C-1-like	2.37697	0.001	33.415	36.443	49.297	4.254	5.189	10.224
	LOC108216714	B3 domain-containing protein At3g19184-like	2.14078	0.001	16.928	45.399	48.611	9.285	8.863	3.399
	LOC108204873	peptidyl-prolyl cis-trans isomerase FKBP13, chloroplastic	2.13731	0.001	36.412	37.736	54.223	5.327	12.877	6.681
	LOC108220101	uncharacterized LOC108220101	2.06097	0.001	25.252	48.352	58.68	12.976	10.244	5.71
	LOC108218851	protein fluG	2.06069	0.01	25.436	33.392	49.711	17.854	2	2.092
	LOC108216271	uncharacterized LOC108216271	1.98248	0.001	30.226	42.434	57.227	11.054	11.447	7.912
	LOC108206771	uncharacterized LOC108206771	1.96452	0.001	37.355	32.212	62.008	12.959	9.053	10.114
	LOC108205260	protein TIC 55, chloroplastic	1.96323	0.001	36.441	48.337	59.62	17.995	32.628	14.634
	LOC108197162	serine carboxypeptidase II-3-like	1.87191	0.01	20.794	57.833	63.811	5.054	18.154	6.877
	LOC108195285	rhodanese-like domain-containing protein 10	1.87097	0.001	28.169	37.033	50.302	8.121	13.079	6.764
	LOC108220098	uncharacterized LOC108220098	1.83998	0.001	34.561	43.436	51.564	6.993	16.668	7.669
	LOC108224040	ribulose-1,5 bisphosphate carboxylase/oxygenase large subunit N-methyltransferase, chloroplastic	1.82176	0.001	22.928	37.135	67.575	10.158	13.081	8.667
	LOC108214449	UPF0301 protein SCO2948	1.80824	0.001	29.086	42.613	65.44	8.263	12.7	13.546
	LOC108223827	serine/threonine-protein kinase SRK2G-like	1.77823	0.001	27.081	52.835	38.141	7.942	10.916	12.145
	LOC108199320	1-aminocyclopropane-1-carboxylate oxidase-like	1.75063	0.05	12.007	33.496	53.185	4.807	14.351	2.963
	LOC108225204	probable BOI-related E3 ubiquitin-protein ligase 3	1.72554	0.01	24.286	30.075	49.306	5.323	12.187	9.893
	LOC108223158	probable protein phosphatase 2C 39	1.70363	0.01	21.354	38.3	50.854	10.28	9.847	10.779
	LOC108210397	FAD-dependent urate hydroxylase-like	1.69721	0.05	23.826	34.309	61.569	2.058	20.29	3.108
	LOC108227095	sugar transporter ERD6-like 6	1.68695	0.01	17.651	27.387	63.288	10.703	8.474	10.735
	LOC108214874	thylakoid lumenal 15 kDa protein 1, chloroplastic	1.67665	0.01	33.36	36.301	38.248	12.441	13.637	5.637
	LOC108199838	cyclin-T1-3-like	1.66091	0.001	32.612	50.103	46.231	16.494	11.384	12.298
	LOC108227361	uncharacterized LOC108227361	1.62445	0.01	39.588	38.641	56.338	13.153	18.89	8.885
	LOC108219116	fimbrin-1-like	1.62061	0.01	18.749	32.6	48.604	8.98	10.984	9.269
	LOC108192286	uncharacterized LOC108192286	1.61868	0.01	22.746	43.564	69.9	22.977	9.065	10.065
	LOC108210157	uncharacterized LOC108210157	1.60422	0.01	18.363	40.493	44.984	9.736	10.155	10.928
	LOC108205255	uncharacterized LOC108205255	1.57761	0.05	15.175	54.533	51.298	11.936	15.862	6.716
	LOC108206023	50S ribosomal protein L11, chloroplastic	1.57279	0.01	43.983	28.986	64.327	20.288	13.642	11.168
	LOC108209648	basic leucine zipper 9-like	1.56901	0.01	14.63	55.499	53.608	10.835	14.925	10.801
	LOC108223990	trigger factor-like protein TIG, Chloroplastic	1.54302	0.01	29.74	24.202	55.345	11.721	10.899	12.343
	LOC108223308	inner membrane protein PPF-1, chloroplastic	1.51848	0.01	26.997	37.049	57.233	16.875	14.332	9.093
	LOC108212641	DNA-binding protein DDB_G0278111-like	1.5177	0.05	16.666	52.002	50.984	5.999	17.82	10.271
	LOC108207975	uncharacterized LOC108207975	1.50419	0.05	26.083	56.485	31.765	18.33	12.667	8.098
	LOC108215149	DEAD-box ATP-dependent RNA helicase 18	1.44271	0.01	16.98	57.678	55.664	17.092	18.293	12.585
	LOC108227367	glycogen synthase-like	1.4229	0.01	25.35	29.789	58.545	14.597	14.323	10.848
	LOC108219208	psbP domain-containing protein 3, chloroplastic	1.41433	0.05	30.395	23.439	56.61	14.189	16.725	7.104
	LOC108205081	ACT domain-containing protein ACR3	1.4009	0.01	18.171	36.031	55.494	14.112	12.139	12.28
	LOC108218843	U3 small nucleolar RNA-associated protein 4 homolog	1.38821	0.01	32.05	33.801	68.789	22.526	14.732	12.062
	LOC108224060	suppressor protein SRP40	1.37823	0.01	34.239	45.614	56.521	17.693	12.085	20.285
	LOC108197478	uncharacterized LOC108197478	1.36885	0.05	14.428	44.315	45.315	11.554	11.601	15.517
	LOC108203180	divinyl chlorophyllide a 8-vinyl-reductase, chloroplastic	1.36444	0.05	23.054	27.249	56.957	15.856	14.391	8.553
	LOC108212178	pre-rRNA-processing protein TSR1 homolog	1.34686	0.01	36.441	32.302	58.49	18.957	15.85	13.947
	LOC108197096	thaumatin-like protein 1b	1.32082	0.05	27.351	52.582	36.132	19.982	16.049	9.756
	LOC108193948	probable acyl-CoA dehydrogenase IBR3	1.31824	0.05	20.854	31.083	50.025	16.75	8.709	14.388
	LOC108227547	nuclear transcription factor Y subunit A-1	1.31638	0.05	21.269	20.543	72.96	13.078	7.908	12.239
	LOC108209704	pre-mRNA-processing factor 17	1.30812	0.01	31.02	50.603	60.912	25.992	16.72	14.257
	LOC108194468	histone-lysine N-methyltransferase ATX2-like	1.29369	0.05	38.207	30.663	59.736	17.163	16.09	17.101
	LOC108192261	probable acyl-CoA dehydrogenase IBR3	1.28116	0.01	40.182	44.313	62.603	25.894	15.414	18.698
	LOC108214766	tubulin--tyrosine ligase-like protein 12	1.21411	0.05	37.309	27.35	42.882	23.073	12.768	10.842
	LOC108204295	LETM1 and EF-hand domain-containing protein 1, mitochondrial-like	1.21359	0.05	25.3	27.953	46.052	16.529	14.994	11.69
	LOC108223748	histidine--tRNA ligase, chloroplastic/mitochondrial	1.18108	0.05	42.201	41.925	67.181	21.342	24.72	16.381
	LOC108215733	probable choline kinase 2	1.17033	0.05	15.521	32.681	50.473	17.325	12.871	10.515
	LOC108199834	uncharacterized protein At5g41620-like	1.16776	0.05	26.31	38.079	44.404	19.07	11.492	16.583
	LOC108209120	ubiquitin carboxyl-terminal hydrolase 6-like	1.15245	0.05	31.059	52.529	75.231	30.247	15.687	22.215
	LOC108206101	homeobox-leucine zipper protein HAT5-like	1.13312	0.05	25.2	26.955	49.921	14.586	14.144	16.282
	LOC108199560	methyltransferase-like protein 13	1.03889	0.05	27.614	26.348	48.306	17.976	17.075	13.342
18	LOC108223626	aquaporin PIP2-1-like	-1.41791	0.05	570.878	519.363	301.548	1779.21	1216.42	1400.67
	LOC108202907	probable peroxisomal membrane protein PEX13	-2.00301	0.01	519.9	883.883	186.499	2958.67	3205.33	2084.86
	LOC108193639	defensin-like protein 1	-2.11717	0.05	331.451	345.475	142.472	1195.76	1300.8	1990.83
	LOC108206077	lipid transfer protein EARLI 1-like	-2.19279	0.001	71.547	261.487	402.009	1420.75	1161.07	1329.79
	LOC108193792	protein PHLOEM PROTEIN 2-LIKE A1-like	-2.31297	0.001	336.738	713.582	578.444	3978.6	2433.97	2658.23
	LOC108226177	uncharacterized LOC108226177	-2.46436	0.001	491.703	634.937	73.341	5000.26	2882.65	2238.25
	LOC108205231	sesquiterpene synthase 2	-3.93633	0.001	92.665	24.212	4.097	1957.63	786.298	2441.5
	LOC108200093	ankyrin repeat-containing protein At2g01680-like	-5.30535	0.001	36.23	9.775	5.379	2336.07	1247.85	1386.88
19	LOC108218758	photosystem II 22 kDa protein, chloroplastic	4.28592	0.001	93.506	45.435	57.795	2.785	3.277	1.977
	LOC108210994	photosystem I reaction center subunit XI, chloroplastic	4.14636	0.001	125.023	106.529	90.636	7.766	1.571	4.972
	LOC108209507	ribulose bisphosphate carboxylase/oxygenase activase, chloroplastic-like	3.97824	0.001	128.028	107.237	89.345	4.397	8.43	3.318
	LOC108216971	chlorophyll a-b binding protein 4, chloroplastic-like	3.81759	0.01	151.511	28.357	67.841	5.569	1.698	4.905
	LOC108213574	uncharacterized LOC108213574	3.75254	0.001	135.115	115.601	54.691	0.694	1.544	8.778
	XLOC_005475		3.14852	0.001	104.402	68.483	48.861	12.813	2.893	5.321
	LOC108220546	3-hexulose-6-phosphate isomerase	2.85779	0.001	94.388	77.809	48.25	4.757	10.96	9.304
	LOC108195919	polyneuridine-aldehyde esterase-like	2.73163	0.001	131.007	123.238	88.418	10.163	3.274	27.723
	mttB	orfX; TatC; Ymf16	2.68847	0.01	100.306	31.416	39.312	1.542	1.833	12.753
	XLOC_038868		2.25643	0.001	134.869	64.662	102.445	13.416	27.25	16.551
	LOC108227484	structural maintenance of chromosomes protein 2-1	2.12786	0.05	169.065	85.945	2.29	11.194	3.128	3.868
	LOC108199612	pentatricopeptide repeat-containing protein At5g46580, chloroplastic	2.02939	0.001	114.348	68.942	94.013	23.253	26.556	14.666
	cob	apocytochrome b	2.01364	0.05	138.717	89.456	33.046	6.785	4.917	35.606
	cox1	cytochrome oxidase subunit 1	1.542	0.05	114.655	83.581	65.431	9.413	9.338	54.678
20	LOC108200480	photosystem I reaction center subunit II, chloroplastic-like	6.25592	0.001	2687.32	2782.63	4335.23	40.142	37.798	9.409
	LOC108205071	probable aquaporin PIP1-4	4.58744	0.001	5878.09	5172.11	5474.26	383.746	186.23	89.808
21	LOC108214527	chlorophyll a-b binding protein 13, chloroplastic	6.6401	0.001	215.503	208.084	408.685	2.077	2.088	2.107
	LOC108205957	chlorophyll a-b binding protein, chloroplastic-like	6.36823	0.001	327.484	265.816	334.46	3.181	3.554	2.094
	LOC108196117	chlorophyll a-b binding protein 4, chloroplastic	6.02168	0.001	324.169	279.775	433.519	4.16	3.696	5.169
	LOC108223685	21 kDa protein-like	5.16681	0.001	205.724	479.424	271.989	7.22	2.645	8.964
	LOC108195887	geranylgeranyl diphosphate reductase, chloroplastic	4.40151	0.001	553.222	250.405	484.444	29.825	8.501	3.199
	LOC108219528	magnesium-protoporphyrin IX monomethyl ester [oxidative] cyclase, chloroplastic-like	4.37419	0.001	164.778	288.138	517.851	16.586	9.358	1.222
	LOC108211654	thioredoxin-like protein CXXS1	3.93252	0.001	294.879	417.162	406.533	3.845	29.137	10.475
	LOC108223581	photosystem I reaction center subunit IV, chloroplastic	3.81616	0.001	290.234	271.396	321.889	20.848	22.74	4.561
	LOC108228055	protochlorophyllide reductase	3.38246	0.001	174.506	274.752	455.675	25.983	32.314	8.386
	LOC108219932	temperature-induced lipocalin-1-like	3.27091	0.001	309.927	492.761	466.397	38.442	53.39	19.129
	LOC108211211	putative methyltransferase DDB_G0268948	3.02062	0.001	178.404	241.262	307.027	23.223	25.296	31.726
	LOC108193771	protein PHLOEM PROTEIN 2-LIKE A1-like	2.88207	0.001	381.524	449.019	450.732	68.13	59.158	62.47
	LOC108202654	probable 1-deoxy-D-xylulose-5-phosphate synthase, chloroplastic	2.81056	0.001	235.011	208.382	529.916	34.891	54.363	23.887
	LOC108205134	zinc finger protein CONSTANS-LIKE 4	2.46468	0.001	184.791	280.477	353.579	49.879	57.637	27.802
	LOC108201858	homocysteine S-methyltransferase 2-like	2.23302	0.001	229.705	258.318	329.348	18.452	84.423	32.318
	LOC108218832	probable glutathione S-transferase	2.22762	0.001	164.044	274.884	310.365	59.856	39.017	53.514
	LOC108216556	uncharacterized LOC108216556	2.15684	0.001	247.824	291.779	362.986	60.51	86.195	37.302
	rpl16	ribosomal protein L16	1.91083	0.01	281.513	813.439	212.543	81.952	66.941	159.495
	LOC108197350	wound-induced protein 1	1.83132	0.001	276.458	263.985	431.866	112.44	72.649	85.425
	LOC108225292	uncharacterized LOC108225292	1.56751	0.01	314.956	334.482	151.163	118.901	75.021	74.68
	LOC108215520	cytochrome P450 714A1-like	1.4564	0.05	144.655	362.122	503.855	48.516	164.812	87.054
	LOC108207000	V-type proton ATPase subunit c''1	1.37847	0.01	199.842	256.902	373.326	123.179	104.957	83.213
	LOC108218974	ruBisCO large subunit-binding protein subunit alpha-like	1.29324	0.05	181.157	224.797	347.247	105.406	115.771	70.977
	LOC108224825	histone H1	1.26403	0.05	197.916	311.778	321.457	124.923	112.633	101.967
	LOC108223159	VQ motif-containing protein 4	1.24304	0.05	343.717	284.239	213.065	133.964	100.065	127.396
	LOC108206037	50S ribosomal protein L19-1, chloroplastic-like	1.22226	0.05	264.834	265.299	275.878	103.373	146.645	86.081
	LOC108223780	DCN1-like protein 1	1.16893	0.05	177.814	350.83	320.193	112.913	140.693	105.737
22	LOC108205887	isocitrate dehydrogenase [NAD] regulatory subunit 1, mitochondrial-like	-1.01628	0.05	16.478	27.163	28.267	50.238	56.453	45.514
	LOC108209923	probable methyltransferase PMT13	-1.05755	0.05	17.344	30.593	28.745	66.477	59.863	41.075
	LOC108214667	probable inactive receptor kinase At2g26730	-1.08053	0.05	13.095	27.301	25.479	70.462	40.188	39.342
	LOC108224643	stromal cell-derived factor 2-like protein	-1.09235	0.05	15.289	24.803	29.095	68.494	44.94	45.019
	LOC108208873	quinone oxidoreductase PIG3	-1.09403	0.05	24.254	29.126	26.36	81.408	45.51	57.456
	LOC108200417	adenylate kinase 4	-1.10341	0.05	23.403	40.306	27.604	75.87	61.538	74.948
	LOC108222940	succinyl-CoA ligase [ADP-forming] subunit alpha-2, mitochondrial-like	-1.10343	0.05	23.992	31.487	36.422	76.912	73.722	59.052
	LOC108200613	germin-like protein 5-1	-1.12155	0.05	28.987	41.814	38.71	104.701	79.596	71.795
	LOC108205409	dnaJ protein ERDJ3B	-1.13503	0.05	20.678	25.193	24.658	61.697	43.012	61.779
	LOC108201769	ATP-citrate synthase alpha chain protein 1	-1.1427	0.05	18.059	28.546	29.627	76.798	58.1	42.984
	LOC108205843	bifunctional protein FolD 2	-1.14737	0.05	28.077	36.121	40.186	97.946	89.908	56.864
	LOC108209423	(S)-ureidoglycine aminohydrolase	-1.1565	0.05	12.042	29.54	22.182	54.348	53.462	43.015
	LOC108205086	transcription factor bHLH144-like	-1.15768	0.05	20.346	41.655	36.258	79.741	81.802	68.056
	LOC108214354	protein ABHD17C	-1.17463	0.05	12.292	26.329	22.352	46.78	46.904	50.967
	LOC108204593	uncharacterized LOC108204593	-1.17891	0.05	30.044	34.78	33.064	86.906	76.316	66.643
	LOC108213190	early nodulin-like protein 1	-1.18097	0.05	20.49	22.371	16.459	58.75	33.398	58.509
	LOC108200641	guanine deaminase	-1.18175	0.05	41.025	29.666	12.483	63.601	34.448	51.846
	LOC108224005	probable galacturonosyltransferase 10	-1.18597	0.05	18.963	34.833	21	64.936	70.464	47.561
	LOC108215651	ras-related protein RHN1	-1.20281	0.05	16.21	27.339	16.992	52.531	46.514	48.696
	LOC108197137	uncharacterized LOC108197137	-1.21921	0.05	13.305	45.854	18.721	73.322	68.545	56.984
	LOC108209209	uncharacterized LOC108209209	-1.2754	0.05	28.711	24.89	25.716	53.988	59.11	55.033
	LOC108227314	serine carboxypeptidase II-2	-1.27668	0.01	19.983	26.163	26.855	69.195	57.026	60.188
	LOC108202687	zinc finger CCCH domain-containing protein 14-like	-1.28998	0.05	11.981	35.291	31.87	71.712	59.067	75.568
	LOC108210534	actin-depolymerizing factor 5-like	-1.29468	0.05	13.077	30.411	12.428	66.772	47.069	43.872
	LOC108214867	probable sodium-coupled neutral amino acid transporter 6	-1.30029	0.05	11.193	17.791	29.736	47.227	62.695	40.322
	LOC108210589	actin-depolymerizing factor 5-like	-1.30527	0.05	13.077	32.296	12.428	71.378	49.297	44.487
	LOC108226402	protein LIGHT-DEPENDENT SHORT HYPOCOTYLS 10-like	-1.30939	0.05	10.824	25.541	23.569	46.18	55.705	51.991
	LOC108221900	UPF0496 protein 4-like	-1.37214	0.05	26.515	7.986	9.769	70.689	28.171	49.941
	LOC108199421	uncharacterized LOC108199421	-1.37286	0.01	17.422	25.761	32.745	72.822	65.43	54.206
	LOC108219201	serine hydroxymethyltransferase, mitochondrial-like	-1.39995	0.01	11.583	29.086	28.054	88.485	64.763	42.312
	LOC108223774	heme-binding protein 2-like	-1.40514	0.05	22.294	34.84	4.803	67.543	63.852	72.355
	LOC108209478	auxin efflux carrier component 7	-1.40761	0.01	11.909	20.66	25.708	72.749	47.637	43.757
	LOC108224796	E3 ubiquitin-protein ligase RNF5-like	-1.41657	0.05	21.315	21.691	9.234	74.871	39.253	54.114
	LOC108227345	malate dehydrogenase 1, mitochondrial-like	-1.42982	0.05	21.662	25.398	25.585	75.813	81.616	42.45
	LOC108218883	transmembrane 9 superfamily member 11-like	-1.43087	0.01	18.567	34.647	13.287	78.205	68.153	56.93
	LOC108210946	uncharacterized LOC108210946	-1.43559	0.05	18.894	28.663	11.096	56.023	53.545	74.178
	LOC108219097	VIN3-like protein 2	-1.45499	0.05	5.468	25.105	17.705	63.556	32.63	49.633
	LOC108193207	protein CDI-like	-1.45789	0.05	10.696	29.722	7.143	61.319	53.431	38.931
	LOC108226511	uncharacterized LOC108226511	-1.46517	0.05	16.58	23.318	3.621	58.761	34.821	58.995
	LOC108200533	protein WVD2-like 3	-1.47093	0.05	7.267	35.291	17.097	92.206	51.157	52.472
	LOC108227140	probable E3 ubiquitin-protein ligase RHC1A	-1.47156	0.05	7.541	38.86	25.87	103.695	61.578	59.752
	LOC108213047	acid phosphatase 1-like	-1.47756	0.05	14.611	34.12	9.173	69.7	56.509	59.499
	LOC108210384	probable tocopherol O-methyltransferase, chloroplastic	-1.49384	0.01	25.703	21.9	22.622	84.574	74.63	58.305
	LOC108197354	probable voltage-gated potassium channel subunit beta	-1.49617	0.01	21.625	24.284	21.187	69.463	73.852	62.7
	LOC108197317	auxin-responsive protein IAA27-like	-1.50447	0.05	8.11	33.977	11.777	73.347	63.47	39.288
	LOC108200057	ADP-ribosylation factor-like protein 5	-1.51787	0.05	18.639	26.908	9.625	53.206	71.802	57.257
	LOC108204769	bifunctional aspartate aminotransferase and glutamate/aspartate-prephenate aminotransferase	-1.5267	0.001	16.236	29.948	23.715	90.778	59.869	66.317
	LOC108211082	F-box protein At3g44326-like	-1.53847	0.05	10.721	23.802	17.687	67.588	35.643	64.387
	LOC108197487	uncharacterized LOC108197487	-1.57632	0.05	6.797	13.364	32.62	62.217	47.088	60.256
	LOC108205986	protein NRT1/ PTR FAMILY 1.2-like	-1.58067	0.001	9.437	15.319	23.702	57.022	39.7	54.269
	LOC108214960	L-ascorbate oxidase homolog	-1.59125	0.05	15.728	22.585	5.087	85.317	45.276	36.885
	LOC108211418	rho GDP-dissociation inhibitor 1-like	-1.62375	0.01	16.057	17.115	8.074	77.221	40.569	37.467
	LOC108227159	protein O-linked-mannose beta-1,4-N-acetylglucosaminyltransferase 2-like	-1.63877	0.001	11.841	30.829	20.534	80.859	83.267	51.784
	LOC108205820	probable histone H2B.1	-1.65106	0.01	9.47	40.934	13.463	102.349	66.371	72.667
	LOC108193011	bifunctional pinoresinol-lariciresinol reductase 2-like	-1.66986	0.01	32.282	22.913	8.821	88.44	64.058	106.583
	LOC108200013	gamma-glutamyltranspeptidase 3-like	-1.721	0.001	14.874	17.323	10.433	67.849	43.163	50.384
	LOC108219286	endoglucanase 10	-1.75377	0.001	9.048	22.135	8.795	73.267	46.884	37.146
	LOC108227568	glyceraldehyde-3-phosphate dehydrogenase GAPCP2, chloroplastic-like	-1.75506	0.001	18.166	19.915	25.53	76.185	72.407	81.286
	LOC108214501	trans-anol O-methyltransferase 1-like	-1.76107	0.001	12.73	16.832	37.082	85.126	71.107	85.401
	LOC108227400	probable galactinol--sucrose galactosyltransferase 2	-1.76321	0.01	16.102	18.982	6.576	61.377	54.268	55.773
	LOC108211239	lamin-like protein	-1.80809	0.001	12.42	22.876	15.249	80.826	79.464	41.597
	LOC108221029	dirigent protein 22-like	-1.85413	0.01	22.92	13.004	7.833	107.235	42.11	66.02
	LOC108193391	uncharacterized LOC108193391	-1.85878	0.001	7.625	25.729	15.147	94.574	60.421	47.079
	LOC108196051	EID1-like F-box protein 2	-1.86744	0.01	5.427	7.423	34.058	56.859	44.735	41.045
	LOC108204323	serine/threonine-protein kinase Aurora-2	-1.88175	0.001	9.808	25.883	8.887	83.233	68.826	44.771
	LOC108213279	protein yippee-like At4g27740	-1.90209	0.001	16.387	24.02	12.04	76.074	72.781	77.753
	LOC108199428	probable receptor-like protein kinase At5g18500	-1.91627	0.001	9.66	14.305	15.292	73.112	48.967	41.258
	LOC108206261	2-methylene-furan-3-one reductase-like	-1.92481	0.01	1.534	18.273	16.318	68.139	38.587	60.146
	LOC108223353	phospho-2-dehydro-3-deoxyheptonate aldolase 2, chloroplastic-like	-1.96708	0.01	23.141	22.936	5.735	73.241	78.053	108.306
	LOC108223464	probable inactive receptor kinase At5g58300	-1.98631	0.01	7.496	16.503	11.247	84.263	40.662	38.138
	LOC108217754	phenylalanine ammonia-lyase 3	-2.13068	0.01	12.247	16.862	9.413	97.178	39.305	66.387
	LOC108208957	hippocampus abundant transcript-like protein 1	-2.18982	0.05	5.175	20.397	12.491	75.368	40.548	86.496
	LOC108210405	caffeic acid 3-O-methyltransferase	-2.21179	0.001	10.994	25.775	10.996	95.14	62.604	102.847
	LOC108211620	dof zinc finger protein DOF3.4-like	-2.22508	0.001	8.809	14.003	15.463	87.692	40.423	75.699
	LOC108219065	glucomannan 4-beta-mannosyltransferase 2-like	-2.28597	0.01	1.82	19.343	3.58	50.588	62.101	48.981
	LOC108210565	arogenate dehydratase/prephenate dehydratase 6, chloroplastic	-2.31902	0.01	4.336	12.251	12.136	54.888	35.213	72.339
	LOC108193281	cytochrome P450 CYP71D313-like	-2.35119	0.001	13.098	12.113	5.166	85.041	52.072	61.131
	LOC108199864	polygalacturonase-1 non-catalytic subunit beta-like	-2.42678	0.001	6.359	17.752	5.106	94.89	60.177	45.149
	LOC108223317	phenylalanine ammonia-lyase 1	-2.4692	0.05	5.103	11.773	6.731	82.82	27.714	51.557
	LOC108211343	laccase-3-like	-2.48843	0.001	12.175	15.596	4.849	94.268	56.515	86.073
	LOC108198003	bifunctional epoxide hydrolase 2-like	-2.67715	0.05	5.85	19.324	10.574	72.27	69.648	135.762
	LOC108205022	uncharacterized LOC108205022	-2.75602	0.01	8.808	10.054	5.455	112.511	35.038	70.612
	LOC108198638	delta(12) fatty acid desaturase FAD2-like	-2.88208	0.01	2.032	9.242	5.11	61.537	29.869	69.205
	LOC108213219	gibberellin-regulated protein 14	-3.03075	0.01	6.65	3.476	8.399	93.537	102.221	23.701
	LOC108200940	CASP-like protein 1	-3.21629	0.01	4.572	2.359	9.677	100.969	28.009	84.605
	LOC108223508	beta-galactosidase 3-like	-3.45956	0.001	1.911	6.611	2.688	86.13	41.901	38.052
	LOC108207089	cytochrome P450 CYP736A12-like	-3.59803	0.01	1.283	6.54	4.813	130.113	20.519	48.295
23	LOC108220066	uncharacterized LOC108220066	2.23422	0.001	108.515	100.844	85.066	12.826	20.606	23.463
	LOC108206774	DNA-directed RNA polymerases I and III subunit RPAC2-like	1.91761	0.001	88.003	72.777	87.093	27.051	23.366	13.465
	LOC108193804	endo-1,3;1,4-beta-D-glucanase-like	1.70234	0.001	71.554	88.69	50.067	25.662	18.489	20.408
	LOC108196153	protein NBR1 homolog	1.70098	0.001	60.11	110.758	98.989	30.182	29.289	20.19
	LOC108197591	pathogenesis-related protein 2	1.67078	0.01	94.078	71.514	90.405	17.581	34.29	21.865
	LOC108227194	SNF1-related protein kinase regulatory subunit gamma-like PV42a	1.58863	0.01	63.205	86.452	47.877	18.7	31.875	10.174
	LOC108207169	ankyrin repeat domain-containing protein 39-like	1.52689	0.01	82.99	132.891	100.276	26.494	28.667	39.851
	LOC108211316	thioredoxin-like protein slr0233	1.52446	0.01	33.451	72.617	78.362	25.696	19.783	16.738
	LOC108227543	ylmG homolog protein 1-2, chloroplastic-like	1.46196	0.01	86.73	110.954	93.019	24.755	49.056	25.772
	LOC108224861	uncharacterized LOC108224861	1.4231	0.01	60.937	91.392	75.411	26.965	28.77	26.719
	LOC108204625	50S ribosomal protein L28, chloroplastic	1.32135	0.05	62.795	73.034	87.82	30.471	40.018	17.613
	LOC108219921	uncharacterized LOC108219921	1.24137	0.05	64.208	119.259	78.837	42.293	40.733	25.264
	LOC108201668	mediator-associated protein 2	1.22393	0.05	49.762	146.075	107.959	41.382	41.185	38.387
	LOC108206374	DET1- and DDB1-associated protein 1-like	1.21387	0.05	64	86.1	65.411	30.464	35.865	25.209
	LOC108204280	heavy metal-associated isoprenylated plant protein 3-like	1.21373	0.05	44.717	109.029	65.724	24.534	32.22	30.779
	LOC108225782	uncharacterized LOC108225782	1.17952	0.05	32.621	90.788	60.322	26.186	31.685	17.681
	LOC108221982	uncharacterized LOC108221982	1.17951	0.05	53.93	106.206	85.862	47.368	22.693	35.633
	LOC108214762	DEAD-box ATP-dependent RNA helicase 53-like	1.17533	0.05	75.051	77.096	64.684	38.579	31.64	28.433
	LOC108218898	TBC1 domain family member 15-like	1.16506	0.05	50.463	87.029	84.006	34.502	35.439	25.093
	LOC108194154	mitochondrial fission 1 protein A-like	1.09694	0.05	73.49	121.256	78.038	47.596	45.443	33.846
	LOC108193016	xylulose kinase	1.05867	0.05	59.871	72.562	67.943	45.405	26.462	26.68
24	LOC108207592	TMV resistance protein N-like	4.42482	0.001	11.182	3.893	10.638	0.386	0.219	0.283
	LOC108214027	glutamate--glyoxylate aminotransferase 2-like	4.38286	0.001	9.832	6.465	20.375	0.627	0.259	0.518
	LOC108202257	sodium/hydrogen exchanger 8-like	4.22761	0.001	23.536	10.042	18.25	1.591	0.259	0.256
	LOC108223808	root phototropism protein 2	3.99756	0.001	20.907	10.641	22.53	0.747	0.706	1.165
	LOC108208889	TMV resistance protein N-like	3.91816	0.001	12.189	10.29	22.843	0.822	0.767	0.727
	LOC108228095	F-box protein At3g07870-like	3.9162	0.001	15.408	7.175	14.296	0.803	0.45	0.651
	LOC108195931	fructose-bisphosphate aldolase 1, chloroplastic-like	3.85055	0.001	16.063	7.16	17.689	0.82	0.701	0.654
	LOC108192339	isochorismate synthase, chloroplastic-like	3.73635	0.001	9.762	6.577	17.004	0.918	0.434	0.607
	LOC108223385	uncharacterized LOC108223385	3.58307	0.01	15.067	2.103	6.643	0.366	0.313	0.686
	LOC108211831	thiamine thiazole synthase 1, chloroplastic-like	3.33843	0.05	4.26	3.929	29.105	0.729	0.854	0.531
	LOC108223659	katanin p80 WD40 repeat-containing subunit B1 homolog	3.29864	0.001	14.445	3.834	10.741	0.791	0.828	0.778
	LOC108213155	uncharacterized LOC108213155	3.07124	0.001	13.151	4.552	10.062	1.366	0.337	0.839
	LOC108214350	uncharacterized LOC108214350	2.99493	0.05	15.364	2.429	12.717	1.267	0.869	0.821
	LOC108226651	protein JASON-like	2.98939	0.001	25.836	8.684	14.886	1.796	2.153	1.193
	nad1	NADH dehydrogenase subunit 1	2.98096	0.05	30.157	11.281	2.084	3.656	0.896	9.299
	nad1	NADH dehydrogenase subunit 1	2.98096	0.05	30.157	11.281	2.084	3.656	0.896	9.299
	nad1	NADH dehydrogenase subunit 1	2.98096	0.05	30.157	11.281	2.084	3.656	0.896	9.299
	nad1	NADH dehydrogenase subunit 1	2.98096	0.05	30.157	11.281	2.084	3.656	0.896	9.299
	LOC108221478	uncharacterized LOC108221478	2.95641	0.001	12.242	18.701	9.398	2.896	1.561	1.596
	tRNA-Asn	tRNA-Asn	2.92189	0.05	0	0	0	0	0	0
	LOC108215613	probable transcription factor GLK1	2.89564	0.001	7.674	8.152	4.447	0.606	1.039	0.548
	LOC108204330	cationic amino acid transporter 5	2.88578	0.001	8.281	18.623	19.142	1.993	1.825	1.61
	LOC108205031	2-carboxy-1,4-naphthoquinone phytyltransferase, chloroplastic	2.88458	0.001	16.149	12.171	26.596	4.106	0.825	1.225
	LOC108205227	DNA (cytosine-5)-methyltransferase 1B-like	2.86419	0.001	5.93	3.845	5.691	0.283	0.744	0.642
	LOC108197392	aspartic proteinase nepenthesin-1	2.78935	0.001	10.592	9.652	21.613	1.995	1.028	2.219
	LOC108210835	glucan endo-1,3-beta-glucosidase 14	2.76592	0.001	20.061	28.287	11.628	2.802	3.255	3.598
	LOC108212600	ABC transporter B family member 26, chloroplastic-like	2.75337	0.001	8.84	6.573	23.552	0.857	2.338	1.035
	LOC108192904	thioredoxin reductase NTRC	2.73981	0.001	9.657	11.097	25.018	3.004	1.853	0.916
	LOC108220258	anthocyanidin 3-O-glucosyltransferase 2-like	2.72158	0.001	3.238	7.735	10.286	0.762	0.893	0.922
	LOC108211451	ATP-dependent Clp protease adapter protein CLPS1, chloroplastic-like	2.71264	0.001	7.895	28.234	13.654	1.309	2.881	1.354
	LOC108194949	elongator complex protein 3-like	2.6366	0.001	7.046	7.033	22.534	2.023	0.938	2.527
	LOC108199921	probable inositol transporter 2	2.63645	0.001	5.29	5.564	11.685	0.966	1.046	1.029
	LOC108217568	agmatine deiminase-like	2.62594	0.001	10.59	12.021	29.265	3.87	1.899	1.282
	LOC108196479	pre-mRNA-splicing factor SYF1-like	2.58588	0.05	3.576	0.95	5.777	0.58	0.35	0.349
	LOC108214503	putative disease resistance protein RGA4	2.58536	0.001	7.928	5.505	19.72	1.125	1.802	1.407
	LOC108209303	pentatricopeptide repeat-containing protein At3g18110, chloroplastic	2.58534	0.01	14.925	5.42	13.963	2.48	1.052	1.537
	LOC108204423	protein LNK2	2.54997	0.05	4.608	7.001	31.112	0.407	1.856	1.949
	LOC108192679	uncharacterized LOC108192679	2.52718	0.05	9.232	1.944	11.793	0.866	0.512	0.826
	LOC108194630	cryptochrome-1-like	2.50669	0.01	6.092	9.323	31.423	2.177	1.329	2.69
	LOC108204421	pheophytinase, chloroplastic	2.48747	0.001	7.447	9.698	14.132	3.213	0.601	0.947
	LOC108224540	uncharacterized LOC108224540	2.48479	0.001	2.75	3.141	2.133	0.59	0.33	0.362
	LOC108205600	sodium/hydrogen exchanger 2-like	2.4839	0.001	9.356	10.201	11.003	2.107	1.879	0.953
	LOC108200355	uncharacterized LOC108200355	2.46304	0.001	3.758	10.829	7.954	1.232	0.815	1.335
	LOC108224604	nuclear transcription factor Y subunit A-10	2.44666	0.001	7.793	7.487	16.893	1.699	1.07	2.189
	LOC108195884	pentatricopeptide repeat-containing protein At2g26790, mitochondrial-like	2.43302	0.001	5.536	2.212	4.676	0.838	0.767	0.522
	LOC108209548	uncharacterized LOC108209548	2.42917	0.001	8.804	7.245	6.811	1.821	0.483	1.496
	LOC108203392	RNA polymerase sigma factor sigC	2.4111	0.001	16.275	7.055	15.787	1.66	3.172	1.118
	LOC108227544	single-stranded DNA-binding protein, mitochondrial-like	2.39902	0.001	13.018	23.678	17.715	3.106	2.305	3.837
	LOC108220642	probable protein phosphatase 2C 38	2.39581	0.001	1.119	3.312	5.391	0.421	0.334	0.619
	LOC108200222	selenoprotein H-like	2.39402	0.001	11.317	20.493	19.037	4.472	4.003	1.603
	LOC108204290	eukaryotic initiation factor 4A-2-like	2.3464	0.001	11.956	13.681	14.868	2.447	3.046	2.943
	LOC108204896	pentatricopeptide repeat-containing protein At5g10690	2.34365	0.001	7.135	8.498	19.543	2.988	1.557	1.47
	LOC108204351	2-oxoisovalerate dehydrogenase subunit alpha 2, mitochondrial-like	2.33764	0.001	6.591	10.948	28.846	3.473	2.198	1.856
	LOC108206367	remorin-like	2.33675	0.001	13.032	13.92	9.787	1.311	1.962	2.985
	LOC108196272	GDSL esterase/lipase At4g16230-like	2.32558	0.01	3.136	16.559	23.036	4.158	0.611	1.016
	LOC108202610	E3 ubiquitin-protein ligase RGLG2-like	2.3233	0.001	10.603	8.172	17.113	4.513	1.976	3.004
	LOC108218678	uncharacterized LOC108218678	2.31063	0.001	8.11	3.65	3.593	1.188	0.663	1.338
	LOC108205511	photosystem II stability/assembly factor HCF136, chloroplastic	2.28893	0.001	16.829	16.4	12.945	4.241	3.288	1.185
	LOC108201687	uncharacterized LOC108201687	2.28273	0.001	13.176	7.03	10.766	2.629	1.423	2.139
	LOC108220975	uncharacterized LOC108220975	2.27566	0.01	13.534	5.227	13.558	2.127	1.626	1.9
	LOC108210930	uncharacterized LOC108210930	2.26704	0.001	3.565	4.859	5.08	1.055	0.548	0.921
	LOC108219774	traB domain-containing protein	2.2642	0.001	17.464	17.617	19.722	3.304	5.101	1.479
	LOC108211359	uncharacterized LOC108211359	2.25662	0.001	7.671	12.05	8.4	2.143	1.1	2.19
	LOC108222989	magnesium transporter MRS2-I-like	2.23485	0.001	5.044	13.887	8.496	1.839	1.622	1.589
	LOC108193525	probable inactive poly [ADP-ribose] polymerase SRO5	2.23395	0.001	8.123	3.866	6.553	1.431	0.998	1.051
	LOC108206322	probable protein phosphatase 2C 1	2.23191	0.001	6.041	7.029	16.855	1.414	1.94	3
	LOC108223203	glucose-6-phosphate 1-dehydrogenase, chloroplastic-like	2.2186	0.001	11.808	6.529	10.673	2.036	2.267	1.504
	LOC108206851	uncharacterized LOC108206851	2.21509	0.001	3.821	2.171	2.178	0.638	0.528	0.432
	LOC108209053	uncharacterized LOC108209053	2.20839	0.001	3.843	3.069	4.565	0.597	0.466	1.035
	LOC108199653	endonuclease MutS2	2.20333	0.001	13.198	12.878	27.103	4.58	3.539	2.573
	LOC108196396	uncharacterized LOC108196396	2.20028	0.05	5.804	2.595	17.145	1.198	0.575	2.116
	LOC108216829	disease resistance protein TAO1-like	2.20023	0.001	3.903	7.047	11.949	2.716	0.678	0.778
	LOC108213744	uncharacterized LOC108213744	2.20006	0.001	14.335	13.629	25.368	4.57	2.335	4.044
	LOC108227963	uncharacterized LOC108227963	2.1621	0.001	4.396	8.268	15.016	2.819	1.223	1.397
	LOC108224286	probable nucleoredoxin 1	2.1514	0.01	7.691	4.507	6.267	0.834	0.81	2.01
	LOC108197054	DEAD-box ATP-dependent RNA helicase 58, chloroplastic	2.15041	0.001	3.932	6.465	17.184	1.959	1.909	0.969
	LOC108227417	uncharacterized LOC108227417	2.13812	0.001	12.783	13.23	20.087	1.962	0.778	3.72
	LOC108205510	uncharacterized LOC108205510	2.12719	0.01	5.495	3.008	2.281	0.617	0.839	0.678
	LOC108224143	protein CHLOROPLAST IMPORT APPARATUS 2-like	2.12093	0.001	5.303	7.682	14.812	2.209	1.69	1.283
	LOC108206271	uncharacterized LOC108206271	2.11598	0.01	3.472	8.99	9.602	1.461	0.741	1.995
	LOC108214105	ARM REPEAT PROTEIN INTERACTING WITH ABF2-like	2.11463	0.01	4.572	4.22	15.627	1.765	1.334	1.682
	LOC108204885	probable LRR receptor-like serine/threonine-protein kinase At3g47570	2.10645	0.05	74.096	6.708	2.878	0.324	0.812	0.516
	LOC108206545	uncharacterized LOC108206545	2.10092	0.01	9.506	3.703	7.035	1.114	1.188	1.396
	LOC108220085	protein NRT1/ PTR FAMILY 2.11-like	2.06785	0.001	6.084	5.728	8.273	1.044	1.208	1.972
	LOC108198015	uncharacterized LOC108198015	2.06579	0.001	7.997	6.574	11.403	1.839	1.815	1.828
	LOC108198980	disease resistance protein RPP13-like	2.05625	0.01	12.329	17.703	19.473	2.645	5.7	0.376
	LOC108201902	transcription factor bHLH147-like	2.0378	0.01	5.544	10.267	8.678	1.145	1.821	2.09
	LOC108219525	basic leucine zipper 61-like	2.03344	0.01	2.148	1.126	2.342	0.33	0.282	0.521
	LOC108215885	two-component response regulator-like APRR5	2.02635	0.001	16.254	8.148	17.864	2.91	2.731	3.724
	LOC108210417	preprotein translocase subunit SCY2, chloroplastic-like	2.02019	0.001	4.976	4.037	8.811	1.625	1.027	1.242
	LOC108223392	DNA repair protein RAD51 homolog 4	2.01637	0.01	2.094	9.621	17.064	2.558	1.044	1.063
	LOC108214998	G-type lectin S-receptor-like serine/threonine-protein kinase At4g27290	2.00472	0.01	11.293	7.461	3.477	2.187	2.81	1.096
	LOC108211916	endoribonuclease Dicer homolog 2-like	1.99866	0.01	11.926	8.301	12.021	2.261	0.813	3.891
	LOC108218568	low-temperature-induced cysteine proteinase-like	1.99453	0.01	2.249	8.745	9.731	1.202	0.957	1.995
	LOC108196736	RNA polymerase sigma factor sigB-like	1.98758	0.001	6.659	12.073	21.851	4.918	1.955	2.09
	LOC108220200	uncharacterized LOC108220200	1.98423	0.001	3.854	4.541	3.497	1.278	0.986	0.572
	LOC108205522	uncharacterized LOC108205522	1.97891	0.01	15.115	12.401	25.36	8.84	1.836	1.131
	LOC108195844	dephospho-CoA kinase	1.95574	0.001	19.256	16.001	15.345	4.964	2.56	4.825
	LOC108218535	uncharacterized LOC108218535	1.95538	0.01	4.336	1.985	3.532	0.826	0.748	0.821
	LOC108214152	uncharacterized LOC108214152	1.95175	0.01	25.951	13.053	8.946	3.944	8.824	1.723
	LOC108227348	beta-glucuronosyltransferase GlcAT14A-like	1.93242	0.05	16.787	5.588	19.68	2.008	5.266	1.79
	LOC108195014	proline-rich protein 1-like	1.92715	0.01	2.825	7.093	2.268	1.327	0.785	3.234
	LOC108193965	methyltransferase-like protein 7A	1.92684	0.01	10.468	14.106	7.933	1.774	3.75	1.841
	LOC108215120	TMV resistance protein N-like	1.92611	0.05	5.051	1.955	2.716	0.432	0.705	1.043
	LOC108219399	pentatricopeptide repeat-containing protein At5g66520-like	1.92346	0.01	7.938	11.142	11.449	1.699	3.138	2.334
	LOC108223336	F-box/kelch-repeat protein At3g23880-like	1.91983	0.01	9.118	5.705	2.371	1.618	1.265	1.24
	LOC108209816	uncharacterized LOC108209816	1.9104	0.01	4.654	26.174	18.824	3.875	4.381	2.606
	LOC108192392	F-box protein SKIP19-like	1.90974	0.01	9.12	9.679	11.839	1.99	3.407	1.824
	LOC108215460	18.2 kDa class I heat shock protein-like	1.90702	0.01	19.36	17.535	10.913	2.917	6.394	1.645
	LOC108219996	putative RNA-binding protein YlmH	1.90583	0.01	9.004	11.989	17.459	3.21	2.569	3.308
	LOC108200040	serine/threonine-protein kinase STN7, chloroplastic	1.90535	0.01	5.24	11.467	10.695	1.063	2.119	0.951
	LOC108202640	uncharacterized LOC108202640	1.88723	0.01	8.964	9.006	18.069	2.588	1.925	4.064
	LOC108194061	protein N-lysine methyltransferase METTL21A-like	1.88646	0.01	5.053	8.878	8.771	1.94	2.343	1.093
	LOC108211289	protein ASPARTIC PROTEASE IN GUARD CELL 1	1.87404	0.01	6.137	12.341	9.32	4	1.812	1.435
	LOC108209744	tRNA-splicing endonuclease subunit Sen2-1-like	1.87207	0.01	8.052	12.458	5.76	3.034	0.922	2.719
	LOC108212061	uncharacterized LOC108212061	1.86375	0.05	7.758	3.09	4.05	0.856	1.407	1.405
	LOC108197091	uncharacterized LOC108197091	1.8612	0.01	10.974	5.581	14.474	4.098	1.551	2.424
	LOC108211182	putative F-box/FBD/LRR-repeat protein At4g03220	1.84227	0.01	2.973	12.204	7.36	1.98	1.877	1.532
	LOC108218859	2-methylene-furan-3-one reductase-like	1.83834	0.01	9.415	10.081	17.602	6.722	1.547	0.877
	LOC108209091	uncharacterized LOC108209091	1.83379	0.01	1.082	0.625	1.69	0.349	0.114	0.241
	LOC108222175	26.5 kDa heat shock protein, mitochondrial	1.83309	0.01	8.285	10.532	26.844	2.783	1.929	5.514
	LOC108204412	putative F-box/FBD/LRR-repeat protein At4g03220	1.83301	0.01	10.295	14.8	12.016	4.907	1.339	3.544
	LOC108208184	basic leucine zipper 43-like	1.82057	0.05	19.471	7.337	13.672	2.738	4.46	2.798
	LOC108203006	helicase-like transcription factor CHR28	1.82029	0.05	7.43	7.585	2.449	2.617	1.136	0.389
	LOC108216359	transcription factor bHLH130-like	1.81859	0.05	13.682	8.931	26.271	1.612	6.138	3.157
	LOC108219416	putative cyclic nucleotide-gated ion channel 15	1.79065	0.01	9.656	5.655	10.215	1.689	2.344	2.652
	LOC108215073	uncharacterized LOC108215073	1.78978	0.05	17.762	9.601	4.22	2.878	2.997	2.296
	LOC108227487	protein DETOXIFICATION 24-like	1.78448	0.01	3.792	2.872	7.91	0.96	0.892	1.695
	LOC108228171	protein SUPPRESSOR OF GENE SILENCING 3-like	1.78382	0.01	6.874	8.294	21.929	3.503	3.045	2.801
	LOC108221023	anthocyanidin 3-O-glucosyltransferase 2-like	1.78347	0.01	4.099	5.363	2.077	1.46	0.908	0.687
	LOC108215981	transcription factor IIIB 90 kDa subunit-like	1.78143	0.01	6.38	16.356	9.961	5.68	1.657	1.542
	LOC108205293	uncharacterized LOC108205293	1.78026	0.01	7.586	10.332	15.126	2.603	4.343	1.465
	LOC108211361	UDP-glycosyltransferase 73C6-like	1.7789	0.05	3.569	1.697	1.506	0.646	0.344	0.706
	LOC108197195	ubiquinol oxidase 2, mitochondrial-like	1.76663	0.01	6.645	10.412	10.92	1.174	2.74	2.815
	LOC108205329	putative quinone-oxidoreductase homolog, chloroplastic	1.76009	0.05	40.835	25.382	4.7	6.601	3.489	7.958
	LOC108223328	C2 and GRAM domain-containing protein At5g50170	1.74524	0.05	20.156	11.187	7.645	5.694	2.846	2.914
	LOC108193058	pentatricopeptide repeat-containing protein At3g57430, chloroplastic	1.74472	0.05	6.66	3.21	5.872	1.208	1.996	1.031
	LOC108218586	fructose-bisphosphate aldolase, cytoplasmic isozyme 1	1.74334	0.01	3.345	3.156	8.831	1.079	1.303	0.711
	LOC108206335	uncharacterized LOC108206335	1.72481	0.05	1.596	6.246	6.243	0.587	0.983	1.546
	LOC108213160	rubredoxin	1.72107	0.05	21.842	19.574	11.236	8.156	5.267	1.747
	LOC108197412	probable plastid-lipid-associated protein 7, chloroplastic	1.71971	0.05	12.752	7.214	18.942	5.078	1.718	3.875
	LOC108224851	F-box protein SKIP23-like	1.70839	0.01	7.058	8.526	8.874	1.698	2.547	2.635
	LOC108222972	two-component response regulator-like APRR7	1.70758	0.05	19.674	7.838	20.839	5.726	2.756	4.768
	LOC108197327	BTB/POZ domain-containing protein At2g46260-like	1.69972	0.05	2.584	10.076	15.534	1.887	2.838	2.152
	LOC108227325	endoribonuclease Dicer homolog 1	1.69777	0.001	16.813	10.425	16.569	6.043	3.561	3.645
	LOC108216225	uncharacterized LOC108216225	1.69474	0.05	1.544	8.733	14.223	2.804	1.869	1.316
	LOC108193595	uncharacterized LOC108193595	1.68673	0.01	16.754	17.689	20.661	7.084	6.822	3.012
	LOC108210112	uncharacterized LOC108210112	1.6791	0.01	8.029	9.78	20.331	3.839	3.962	2.532
	LOC108205867	pentatricopeptide repeat-containing protein At5g04780-like	1.67851	0.05	2.33	2.52	7.984	1.023	1.061	1.263
	LOC108198792	uncharacterized LOC108198792	1.67767	0.05	11.675	17.944	11.62	3.335	6.524	1.059
	LOC108209233	serine/arginine repetitive matrix protein 2	1.66705	0.05	4.459	5.595	19.507	3.565	1.648	2.147
	LOC108193286	nucleolin 1-like	1.665	0.01	16.11	10.471	15.807	6.137	2.088	3.926
	LOC108214146	RINT1-like protein MAG2	1.66248	0.05	6.408	5.137	16.494	3.032	2.171	2.332
	XLOC_028395		1.66011	0.01	13.648	9.808	18.936	5.027	4.072	3.567
	LOC108215403	ribosome-binding protein 1	1.64847	0.01	18.328	19.407	19.812	9.115	2.928	5.962
	LOC108216658	mitochondrial carrier protein MTM1-like	1.64405	0.01	6.632	6.639	12.066	3.313	1.423	2.73
	LOC108210663	fructose-1,6-bisphosphatase, chloroplastic-like	1.63981	0.05	20.361	22.528	15.88	4.688	9.943	0.76
	LOC108218896	uncharacterized LOC108218896	1.63032	0.01	8.104	7.581	14.051	4.156	2.391	2.542
	LOC108227708	psbP-like protein 1, chloroplastic	1.62739	0.05	5.024	16.021	5.911	3.557	2.88	1.941
	LOC108193567	uncharacterized LOC108193567	1.61201	0.05	11.075	7.771	19.905	2.954	5.406	2.916
	LOC108210158	uncharacterized LOC108210158	1.61189	0.05	9.126	9.75	12.366	2.569	3.313	3.839
	LOC108227656	uncharacterized LOC108227656	1.60761	0.05	6.696	4.131	13.426	2.622	1.628	2.661
	LOC108193701	putative FBD-associated F-box protein At5g53640	1.60587	0.05	6.163	4.397	4.877	1.408	2.002	1.303
	LOC108227915	K(+) efflux antiporter 3, chloroplastic	1.59928	0.05	3.024	3.889	3.545	1.577	0.58	1.107
	LOC108202979	sanguinarine reductase	1.59745	0.01	5.189	12.442	19.336	3.561	3.663	3.193
	LOC108192769	polyribonucleotide nucleotidyltransferase 2, mitochondrial	1.59647	0.05	8.161	3.837	10.805	3.288	1.696	2.36
	LOC108204776	O-glucosyltransferase rumi-like	1.59561	0.05	14.401	11.538	8.704	1.122	6.111	2.891
	LOC108213134	uncharacterized LOC108213134	1.5925	0.05	7.722	5.458	3.273	1.669	1.575	1.76
	LOC108198565	putative disease resistance RPP13-like protein 3	1.57935	0.01	14.243	19.668	15.574	8.833	5.148	2.108
	LOC108205215	pentatricopeptide repeat-containing protein At3g09650, chloroplastic-like	1.56876	0.01	10.705	12.12	21.527	3.766	6.625	2.83
	LOC108222782	uncharacterized LOC108222782	1.56811	0.05	13.641	9.169	16.77	2.496	1.351	8.852
	LOC108214508	probable alpha,alpha-trehalose-phosphate synthase [UDP-forming] 7	1.5559	0.05	7.96	5.377	4.428	2.392	2.003	1.503
	LOC108214909	cytochrome P450 81D1-like	1.55389	0.05	8.336	10.136	13.596	1.901	5.118	2.426
	LOC108215012	proteinaceous RNase P 1, chloroplastic/mitochondrial-like	1.55386	0.05	3.737	8.709	14.594	4.32	2.2	2.077
	LOC108214450	uncharacterized LOC108214450	1.55327	0.05	12.901	15.389	3.439	5.289	2.31	2.598
	LOC108201303	endoribonuclease Dicer homolog 2-like	1.55254	0.05	13.515	7.135	8.658	3.612	3.478	2.638
	LOC108206066	pentatricopeptide repeat-containing protein At5g66520-like	1.54686	0.05	4.641	5.092	2.722	2.251	0.81	1.154
	LOC108204839	SNF2 domain-containing protein CLASSY 3-like	1.54188	0.01	10.714	13.867	13.117	4.942	4.437	3.294
	LOC108227980	disease resistance protein RPP13-like	1.53211	0.05	5.044	8.293	8.698	0.941	2.064	3.385
	LOC108227790	protein CAJ1	1.52819	0.05	10.806	17.154	24.37	4.478	6.454	5.388
	LOC108202764	pentatricopeptide repeat-containing protein At5g02860	1.5218	0.01	14.132	16.61	21.485	5.61	5.509	6.337
	LOC108200884	F-box/kelch-repeat protein At3g06240-like	1.52156	0.05	4.445	6.304	7.613	3.138	1.367	1.583
	LOC108213741	pentatricopeptide repeat-containing protein At4g13650	1.5211	0.05	5.938	3.172	7.735	1.873	2.337	0.952
	LOC108218436	nuclear transcription factor Y subunit A-10	1.51955	0.05	15.793	7.472	19.079	5.504	3.615	4.372
	LOC108215864	uncharacterized LOC108215864	1.51701	0.05	6.284	4.166	12.65	2.819	2.12	2.688
	LOC108193137	cyclic dof factor 1-like	1.51064	0.01	7.647	17.192	14.225	4.688	2.998	5.134
	LOC108219882	GTPase Era	1.49292	0.05	8.645	14.886	17.312	5.787	5.307	2.039
	LOC108196643	DNA-(apurinic or apyrimidinic site) lyase 2	1.49065	0.05	1.799	7.524	16.35	3.244	1.527	2.567
	LOC108220043	shewanella-like protein phosphatase 1	1.48657	0.05	1.573	8.488	7.465	2.538	1.073	1.776
	LOC108219339	two-component response regulator-like APRR7	1.48637	0.05	5.963	12.627	26.145	4.65	3.864	5.197
	LOC108217332	uncharacterized LOC108217332	1.4858	0.05	4.813	2.809	3.434	1.767	1.149	0.921
	LOC108197483	enoyl-CoA delta isomerase 1, peroxisomal-like	1.47173	0.05	7.648	5.4	14.695	4.009	2.545	2.569
	LOC108220189	transcription termination factor MTERF8, chloroplastic-like	1.46932	0.05	2.31	2.766	5.814	1.083	0.958	1.407
	LOC108205610	CMP-sialic acid transporter 1-like	1.46725	0.05	20.326	28.24	9.482	9.604	7.06	4.054
	LOC108219979	palmitoyl-monogalactosyldiacylglycerol delta-7 desaturase, chloroplastic-like	1.46531	0.05	18.081	12.829	11.276	7.103	4.315	4.126
	LOC108227691	exopolyphosphatase-like	1.46462	0.05	3.322	1.863	3.697	1.261	0.902	0.737
	LOC108227697	exopolyphosphatase-like	1.46462	0.05	3.322	1.863	3.697	1.261	0.902	0.737
	LOC108227608	uncharacterized LOC108227608	1.46427	0.01	11.387	9.988	10.568	5.067	2.852	3.656
	LOC108226438	dynein assembly factor with WDR repeat domains 1-like	1.44992	0.05	10.658	8.203	11.186	5.296	3.684	1.643
	LOC108224957	uncharacterized LOC108224957	1.4492	0.05	4.215	13.2	14.754	3.185	2.997	2.392
	LOC108220834	short-chain dehydrogenase reductase 3a-like	1.44713	0.05	6.335	8.937	14.852	2.436	2.501	4.13
	LOC108219191	lysophospholipid acyltransferase LPEAT2-like	1.44616	0.01	13.155	10.961	19.475	7.299	3.779	4.676
	LOC108222915	J domain-containing protein required for chloroplast accumulation response 1	1.44386	0.05	10.519	8.192	19.944	6.065	2.331	4.67
	LOC108220139	uncharacterized LOC108220139	1.43575	0.05	7.409	15.59	25.487	6.531	5.224	4.395
	LOC108219967	putative hydrolase C777.06c	1.43017	0.05	12.302	10.43	22.535	6.208	3.562	5.186
	LOC108206285	probable disease resistance protein At1g61180	1.42199	0.05	5.047	3.035	3.754	2.751	0.662	1.049
	LOC108208097	uncharacterized LOC108208097	1.42157	0.05	10.988	18.428	15.984	7.85	6.144	1.61
	LOC108215640	probable membrane metalloprotease ARASP2, chloroplastic	1.41895	0.05	16.867	14.619	7.882	8.609	3.756	2.535
	LOC108203049	protein high chlorophyll fluorescent 107	1.41534	0.05	5.212	6.392	11.904	4.128	2.643	1.433
	LOC108215642	DEAD-box ATP-dependent RNA helicase 35-like	1.41399	0.05	9.151	19.784	20.586	7.178	6.559	3.807
	LOC108202646	uncharacterized LOC108202646	1.41289	0.05	3.432	4.284	5.655	1.505	1.368	1.904
	LOC108209918	uncharacterized LOC108209918	1.40632	0.05	6.887	12.301	25.92	4.152	0.771	6.439
	LOC108193216	protein DETOXIFICATION 12-like	1.40518	0.05	7.255	8.472	14.512	3.279	3.25	4.204
	LOC108202854	probable LRR receptor-like serine/threonine-protein kinase RPK1	1.3935	0.05	3.073	1.997	2.73	0.9	0.978	0.788
	LOC108203758	uncharacterized LOC108203758	1.39242	0.05	15.832	13.625	23.391	4.704	8.817	4.984
	LOC108204506	uncharacterized LOC108204506	1.39212	0.05	9.41	9.13	13.518	6.044	3.75	2.922
	LOC108211958	uncharacterized LOC108211958	1.38625	0.05	4.143	4.734	2.72	2.481	0.89	0.936
	LOC108209784	protein SDA1 homolog	1.38511	0.05	18.266	12.065	20.485	9.69	4.329	5.303
	LOC108210442	pyridoxal reductase, chloroplastic	1.38319	0.05	10.786	14.64	23.297	4.785	5.946	6.455
	LOC108225406	gibberellin 3-beta-dioxygenase 2-like	1.38155	0.05	3.436	3.303	3.74	1.347	1.719	0.569
	LOC108220279	superoxide dismutase [Fe], chloroplastic	1.37059	0.05	9.638	7.308	15.764	3.891	4.022	3.844
	LOC108216431	ribosomal RNA small subunit methyltransferase NEP1-like	1.36929	0.05	17.025	13.416	18.998	9.529	4.661	4.452
	LOC108223313	ribonuclease J-like	1.36678	0.05	7.168	3.832	8.63	2.993	2.197	2.098
	LOC108208763	uncharacterized LOC108208763	1.36655	0.05	16.272	9.049	14.446	6.577	3.606	5.325
	LOC108210116	probable DEAD-box ATP-dependent RNA helicase 48	1.36614	0.05	12.249	10.139	18.25	5.831	5.912	3.696
	LOC108206024	uncharacterized LOC108206024	1.35688	0.05	10.747	10.521	21.051	7.581	4.723	3.724
	LOC108226392	uncharacterized LOC108226392	1.35585	0.05	4.119	6.134	14.837	2.762	2.537	3.24
	LOC108193271	cell division protein FtsY homolog, chloroplastic	1.35215	0.05	7.672	12.586	15.247	4.595	4.166	4.245
	LOC108200835	transcription termination factor MTEF1, chloroplastic-like	1.34527	0.05	3.395	5.489	12.402	2.723	2.727	1.631
	LOC108193419	uncharacterized LOC108193419	1.34387	0.05	13.295	16.746	22.823	7.222	2.264	9.499
	LOC108197404	ankyrin-1	1.33522	0.05	13.7	19.637	10.78	7.97	4.062	5.401
	LOC108209093	transcription factor IIIB 60 kDa subunit-like	1.3314	0.05	7.583	7.885	10.086	5.122	1.895	2.765
	LOC108219931	uncharacterized LOC108219931	1.33018	0.05	9.367	11.964	16.462	6.089	5.055	5.574
	LOC108208591	probable disease resistance protein RF45	1.32381	0.05	1.43	1.995	3.059	0.841	0.604	0.912
	LOC108210178	uncharacterized LOC108210178	1.32182	0.05	9.294	10.056	16.719	4.037	3.303	5.944
	LOC108214748	uncharacterized LOC108214748	1.3217	0.05	3.467	4.676	8.878	2.937	1.195	2.11
	LOC108208739	putative threonine aspartase	1.31949	0.05	12.363	11.206	23.079	6.62	5.391	5.73
	LOC108203054	uncharacterized LOC108203054	1.2945	0.05	11.11	13.1	12.155	6.641	3.565	4.581
	LOC108192946	probable inactive purple acid phosphatase 16	1.27992	0.05	7.566	7.213	12.819	4.591	2.888	2.681
	LOC108227738	GTP-binding protein BRASSINAZOLE INSENSITIVE PALE GREEN 2, chloroplastic	1.27012	0.05	6.664	11.714	17.059	4.529	4.253	4.809
	LOC108200105	nudix hydrolase 2-like	1.26999	0.05	14.188	15.188	21.043	9.217	5.899	5.609
	LOC108198319	uncharacterized LOC108198319	1.26905	0.05	9.562	8.3	5.929	4.704	2.571	2.537
	LOC108192301	LETM1 and EF-hand domain-containing protein 1, mitochondrial	1.26545	0.05	17.234	11.416	21.708	8.715	4.837	6.699
	LOC108219372	probable acyl-activating enzyme 6	1.26188	0.05	13.007	7.53	14.357	6.79	3.62	4.301
	LOC108209534	RNA polymerase I termination factor-like	1.26117	0.05	14.852	10.04	9.512	7.722	2.732	4.086
	LOC108195817	uncharacterized LOC108195817	1.25737	0.05	14.644	9.763	14.088	3.946	5.08	6.283
	LOC108200294	rubisco accumulation factor 2, chloroplastic-like	1.25653	0.05	9.935	5.725	8.354	3.191	4.092	2.588
	LOC108204250	peroxisome biogenesis protein 6	1.25108	0.05	19.392	12.222	14.56	9.548	5.698	4.418
	LOC108204976	uncharacterized LOC108204976	1.25072	0.05	7.951	10.761	10.31	3.891	6.03	2.215
	LOC108194050	uncharacterized LOC108194050	1.25049	0.05	8.779	11.106	25.24	7.61	4.796	4.629
	LOC108219343	uncharacterized LOC108219343	1.24678	0.05	10.473	8.429	19.431	6.954	4.389	4.184
	LOC108223656	uncharacterized LOC108223656	1.23903	0.05	5.592	10.251	10.67	2.752	3.692	3.944
	LOC108218620	uncharacterized LOC108218620	1.23884	0.05	9.299	6.173	6.794	4.422	1.778	3.328
	LOC108204490	ATP-dependent DNA helicase At3g02060, chloroplastic	1.23132	0.05	8.288	8.358	18.871	6.396	4.32	3.653
	LOC108218406	uncharacterized LOC108218406	1.22992	0.05	17.048	19.215	18.848	7.842	10.024	4.693
	LOC108210029	serine/threonine-protein kinase D6PKL1-like	1.22173	0.05	8.469	11.269	13.268	5.457	3.309	5.124
	LOC108204988	pentatricopeptide repeat-containing protein At5g25630-like	1.21964	0.05	8.78	13.336	21.012	8.634	3.11	5.879
	LOC108214539	uncharacterized LOC108214539	1.17498	0.05	13.899	12.48	19.043	9.812	4.883	5.471
	LOC108204570	mechanosensitive ion channel protein 2, chloroplastic-like	1.15925	0.05	12.07	12.215	21.674	9.1	4.891	6.804
	LOC108199761	lysine-specific demethylase JMJ25-like	1.13941	0.05	9.231	7.348	12.853	5.394	5.112	4.085
	LOC108223123	ABC transporter D family member 2, chloroplastic-like	1.11546	0.05	11.784	10.101	18.201	8.218	4.962	5.034
	LOC108219136	uncharacterized LOC108219136	-1.09557	0.05	2.936	5.707	5.605	12.566	9.947	9.448
	LOC108218899	calcium-transporting ATPase 1, chloroplastic-like	-1.13193	0.05	3.263	4.561	4.493	8.207	9.366	10.594
	LOC108224690	kinesin-like protein KIF18B	-1.16616	0.05	2.498	4.086	4.115	12.727	7.284	6.323
	LOC108224327	pentatricopeptide repeat-containing protein At4g21705, mitochondrial-like	-1.17901	0.05	4.048	7.967	9.794	16.594	21.236	14.522
	LOC108219912	protein trichome birefringence-like 35	-1.18088	0.05	3.551	8.14	9.464	22.921	13.423	14.93
	LOC108225482	replication protein A 32 kDa subunit B	-1.19036	0.05	6.41	6.276	7.43	16.188	20.703	13.063
	LOC108227987	inositol polyphosphate multikinase beta-like	-1.19363	0.05	4.293	6.936	4.958	18.19	13.446	9.438
	LOC108224146	urease accessory protein F	-1.21994	0.05	3.787	7.637	9.609	16.995	19.567	13.288
	LOC108227728	auxin-responsive protein IAA27-like	-1.22058	0.05	4.302	7.424	7.271	20.22	11.713	15.867
	LOC108193379	uncharacterized protein At1g04910	-1.23826	0.05	3.769	6.144	3.239	16.313	10.485	7.343
	LOC108200228	WAT1-related protein At4g19185	-1.23877	0.05	4.614	7.389	6.489	14.012	13.268	14.947
	LOC108192989	uncharacterized LOC108192989	-1.2502	0.05	2.749	7.112	2.491	14.22	10.027	9.245
	LOC108223819	uncharacterized LOC108223819	-1.25138	0.05	7.64	5.934	4.742	23.135	13.253	13.665
	LOC108196797	phosphate transporter PHO1 homolog 3-like	-1.26619	0.05	1.229	4.18	5.459	12.182	6.444	9.301
	LOC108218477	serine/threonine-protein kinase EDR1	-1.27123	0.05	1.042	1.909	4.135	4.918	4.917	5.188
	LOC108209714	mucin-17-like	-1.27693	0.05	0.893	2.455	1.528	5.916	3.621	3.667
	LOC108206342	F-box protein SKIP19-like	-1.27739	0.05	3.454	5.973	6.532	12.752	13.689	14.779
	LOC108213115	endoplasmic reticulum-Golgi intermediate compartment protein 3-like	-1.30131	0.05	2.174	7.523	6.982	18.889	11.092	12.162
	LOC108220037	uncharacterized LOC108220037	-1.30953	0.05	4.137	2.749	2.752	8.322	10.585	7.827
	LOC108220124	serine/threonine-protein kinase CDL1-like	-1.31688	0.05	2.456	1.732	1.559	6.591	4.081	6.028
	LOC108220172	alpha-L-fucosidase 1	-1.33731	0.05	5.855	3.681	3.98	16.825	11.161	11.408
	LOC108225700	long chain acyl-CoA synthetase 6, peroxisomal-like	-1.3439	0.05	3.112	2.592	3.95	11.752	5.889	9.341
	LOC108227235	auxin response factor 5	-1.3536	0.05	2.714	3.07	4.902	12.42	7.826	8.81
	LOC108227581	protein HOMOLOG OF MAMMALIAN LYST-INTERACTING PROTEIN 5-like	-1.35543	0.05	4.202	3.127	2.477	15.432	7.69	6.867
	LOC108215207	blue copper protein-like	-1.35799	0.05	5.567	6.164	5.237	13.75	16.973	16.216
	LOC108210851	shikimate O-hydroxycinnamoyltransferase-like	-1.35992	0.05	1.397	2.51	5.921	12.305	10.725	4.729
	LOC108218340	uncharacterized LOC108218340	-1.3605	0.05	6.977	2.487	9.906	26.065	12.018	10.939
	LOC108206059	adenine phosphoribosyltransferase 3	-1.36088	0.05	3.497	6.409	3.653	17.205	12.619	10.432
	LOC108224803	WD repeat-containing protein WRAP73	-1.36207	0.05	5.808	6.494	4.927	25.258	14.628	11.37
	LOC108204970	histidine kinase 4-like	-1.37401	0.05	0.956	6.021	5.057	16.852	10.578	7.557
	LOC108223538	SET and MYND domain-containing protein 4	-1.38945	0.05	4.257	2.926	4.723	14.491	8.605	6.473
	LOC108204475	probable NAD(P)H dehydrogenase (quinone) FQR1-like 1	-1.39882	0.05	4.814	5.021	4.447	19.355	9.944	13.97
	LOC108196403	uncharacterized protein At1g04910-like	-1.41107	0.05	1.51	9.457	5.219	21.506	14.159	13.226
	LOC108215758	putative serine/threonine-protein kinase	-1.41764	0.05	1.162	2.656	5.325	13.939	6.528	6.408
	LOC108221967	ethylene-responsive transcription factor ERF003	-1.42476	0.05	2.22	4.096	7.796	20.491	9.863	11.629
	LOC108194058	uncharacterized LOC108194058	-1.42829	0.05	1.62	5.113	2.192	14.018	7.084	7.75
	LOC108206750	mitochondrial carnitine/acylcarnitine carrier-like protein	-1.43555	0.05	6.934	4.991	5.767	17.947	17.02	12.291
	LOC108211855	WUSCHEL-related homeobox 4-like	-1.4523	0.05	2.602	8.401	5.851	22.456	18.297	11.38
	LOC108225732	glycoprotein 3-alpha-L-fucosyltransferase A-like	-1.46818	0.01	2.823	6.577	7.899	20.792	15.804	17.455
	LOC108205361	inositol-tetrakisphosphate 1-kinase 1-like	-1.46852	0.05	2.545	3.161	2.282	7.104	9.906	6.224
	LOC108199770	protein argonaute 10-like	-1.48628	0.05	1.11	0.707	1.437	3.982	2.594	3.373
	LOC108203154	uncharacterized LOC108203154	-1.49508	0.01	2.945	5.167	7.831	24.303	13.522	11.301
	LOC108207021	ATPase WRNIP1	-1.50124	0.05	1.517	1.974	2.318	6.701	7.516	4.092
	LOC108215691	serine/threonine-protein kinase-like protein CCR4	-1.51477	0.05	0.639	2.081	2.366	6.836	3.643	5.977
	LOC108210641	glutathione gamma-glutamylcysteinyltransferase 1-like	-1.51878	0.05	5.508	4.451	2.809	13.509	12.625	15.262
	LOC108219274	xyloglucan glycosyltransferase 4-like	-1.51911	0.05	1.002	4.249	3.758	12.064	7.487	8.989
	LOC108219250	probable xyloglucan glycosyltransferase 12	-1.55473	0.01	1.824	3.568	4.886	14.236	10.193	7.99
	LOC108206108	transcription factor bHLH157-like	-1.56292	0.05	1.622	3.742	2.443	12.536	5.149	8.867
	LOC108193807	uncharacterized LOC108193807	-1.57433	0.01	5.601	5.873	3.992	21.121	12.23	14.298
	LOC108204759	4-coumarate--CoA ligase-like 9	-1.58784	0.01	2.923	6.821	5.754	20.579	12.849	17.876
	LOC108209315	AT-hook motif nuclear-localized protein 5-like	-1.59198	0.01	0.988	2.759	2.017	6.259	7.776	5.64
	LOC108218417	beta-galactosidase 10	-1.60229	0.05	3.477	2.147	0.918	9.618	10.722	4.795
	LOC108219229	uncharacterized protein At1g04910-like	-1.60461	0.01	2.787	4.134	4.523	15.517	7.926	14.84
	LOC108215516	probable auxin efflux carrier component 1c	-1.60567	0.01	4.191	4.178	3.318	19.63	10.907	10.653
	LOC108219435	stomatal closure-related actin-binding protein 3-like	-1.61864	0.01	3.258	6.301	4.723	22.807	9.839	16.527
	LOC108214430	uncharacterized LOC108214430	-1.62068	0.05	4.167	1.972	9.43	19.66	13.771	21.138
	LOC108204217	UTP--glucose-1-phosphate uridylyltransferase	-1.64405	0.01	4.113	4.081	5.16	23.486	15.532	8.527
	LOC108199869	protein NSP-INTERACTING KINASE 3-like	-1.64863	0.01	2.276	6.145	4.046	20.839	14.694	11.722
	LOC108220479	RING finger and transmembrane domain-containing protein 1-like	-1.66641	0.01	1.25	3.287	1.458	10.432	8.602	4.315
	LOC108194303	uncharacterized LOC108194303	-1.67478	0.01	2.01	5.628	2.35	18.218	9.65	10.999
	LOC108216709	ABC transporter G family member 6-like	-1.68143	0.01	2.045	1.498	0.955	6.881	4.434	6.404
	LOC108192398	ABC transporter G family member 6-like	-1.68143	0.01	2.045	1.498	0.955	6.881	4.434	6.404
	LOC108205960	fasciclin-like arabinogalactan protein 8	-1.68749	0.05	5.845	3.213	1.376	25.797	10.455	10.262
	LOC108206981	importin beta-like SAD2 homolog	-1.68914	0.01	0.593	0.595	0.826	3.533	1.623	2.33
	LOC108203092	serine/threonine-protein kinase D6PKL1-like	-1.68923	0.01	2.235	8.868	1.82	21.936	16.424	13.38
	LOC108218360	beta-glucuronosyltransferase GlcAT14B-like	-1.71428	0.05	1.594	6.852	4.294	25.15	11.308	13.258
	LOC108222953	low-temperature-induced cysteine proteinase-like	-1.71859	0.05	2.465	0.726	1.676	9.044	3.945	7.24
	LOC108215674	putative disease resistance RPP13-like protein 3	-1.72852	0.05	1.177	2.786	4.258	6.83	10.762	10.906
	LOC108214789	synaptotagmin-2-like	-1.75199	0.01	2.721	3.701	3.386	16.611	7.475	13.784
	LOC108220643	BES1/BZR1 homolog protein 4-like	-1.76294	0.05	1.921	3.979	3.748	13.81	7.862	15.563
	LOC108202799	oligopeptide transporter 1-like	-1.76857	0.01	2.629	2.688	1.235	7.952	7.952	10.518
	LOC108209874	uncharacterized LOC108209874	-1.7803	0.01	2.89	5.753	3.702	17.125	16.686	14.899
	LOC108194279	acyl-CoA-binding domain-containing protein 5-like	-1.79008	0.05	2.077	0.657	0.914	6.34	7.852	2.565
	LOC108206149	putative phospholipid:diacylglycerol acyltransferase 2	-1.79572	0.01	1.733	3.259	6.507	11.28	14.856	15.663
	LOC108209878	DNA replication licensing factor MCM7	-1.8017	0.01	2.507	3.533	1.401	15.394	9.023	7.395
	LOC108215044	uncharacterized protein At2g39920	-1.81341	0.01	1.946	7.602	2.161	14.502	15.337	19.312
	LOC108211406	TMV resistance protein N-like	-1.81721	0.05	3.122	1.185	0.742	5.098	1.824	6.259
	LOC108228083	CASP-like protein 2D1	-1.82091	0.01	3.476	2.257	3.469	12.503	10.472	13.482
	LOC108224030	mitogen-activated protein kinase 3-like	-1.82784	0.01	1.947	5.525	4.662	17.401	10.846	20.172
	LOC108226390	phosphoenolpyruvate carboxylase 2-like	-1.83661	0.001	3.079	4.192	5.695	20.289	17.457	12.383
	LOC108220242	probable LRR receptor-like serine/threonine-protein kinase At1g56140	-1.84052	0.01	2.788	1.001	1.412	5.8	8.5	4.823
	LOC108205998	transcription factor DIVARICATA-like	-1.85076	0.01	0.953	4.146	1.829	12.359	9.7	7.849
	LOC108215375	probable mannitol dehydrogenase	-1.85569	0.01	3.785	2.435	4.62	17.714	12.746	13.498
	LOC108225144	alcohol dehydrogenase-like	-1.88993	0.01	2.076	6.506	2.468	18.966	16.068	14.188
	LOC108215934	protein EDS1B-like	-1.92578	0.01	3.903	3.722	4.576	12.675	18.232	19.219
	LOC108216136	9-cis-epoxycarotenoid dioxygenase NCED3, chloroplastic	-1.97881	0.01	1.021	0.618	1.299	3.664	3.945	5.836
	LOC108214742	probable polyamine oxidase 5	-2.00785	0.001	0.966	2.542	2.72	12.827	8.816	6.95
	LOC108193509	patatin-like protein 2	-2.02234	0.05	1.433	1.043	1.839	11.829	3.51	6.574
	LOC108219338	kinesin-like protein KIN-5C	-2.06703	0.001	2.19	2.4	2.522	17.88	9.267	7.585
	LOC108227611	omega-hydroxypalmitate O-feruloyl transferase	-2.06844	0.001	2.486	3.457	1.731	15.321	8.787	14.796
	LOC108216363	protein JASON	-2.07262	0.01	3.984	3.602	1.252	27.219	13.445	9.875
	LOC108224249	L-ascorbate oxidase homolog	-2.07459	0.001	1.204	1.819	2.243	8.45	10.479	6.049
	LOC108192737	uncharacterized LOC108192737	-2.1087	0.001	5.306	12.439	9.014	19.844	8.911	13.105
	LOC108206919	two-pore potassium channel 3-like	-2.19276	0.001	3.004	2.408	1.505	18.068	11.578	8.73
	LOC108228003	uncharacterized LOC108228003	-2.19382	0.001	0.667	1.624	0.939	8.151	4.906	4.896
	LOC108207894	ATPase ASNA1 homolog	-2.21321	0.001	1.453	4.075	4.403	20.459	14.951	16.566
	LOC108217389	uncharacterized LOC108217389	-2.28702	0.001	2.055	2.167	1.41	10.869	8.271	14.708
	LOC108194400	katanin p80 WD40 repeat-containing subunit B1 homolog	-2.30093	0.001	0.941	2.176	0.959	11.636	4.849	7.008
	LOC108211852	uncharacterized LOC108211852	-2.37756	0.05	3.037	1.562	1.687	12.375	19.738	9.175
	LOC108211544	uncharacterized LOC108211544	-2.38251	0.01	0.754	2.239	1.924	10.51	13.125	6.076
	LOC108214169	probable galacturonosyltransferase-like 10	-2.38427	0.001	2.478	3.009	2.605	22.543	10.668	17.607
	LOC108223807	hypothetical protein	-2.4855	0.001	0.567	1.35	0.633	6.594	6.889	4.054
25	LOC108216163	F-box/kelch-repeat protein At2g44130-like	3.59293	0.001	55.571	12.316	62.052	3.011	3.119	1.577
	LOC108197215	uncharacterized LOC108197215	3.57106	0.001	47.544	47.172	56.174	4.003	4.475	2.802
	LOC108220770	protein GLUTAMINE DUMPER 2-like	3.15279	0.001	61.069	62.839	43.324	7.982	4.744	4.954
	LOC108203757	uncharacterized LOC108203757	3.05565	0.001	67.415	3.479	30.972	1.528	1.738	3.878
	LOC108218388	uncharacterized LOC108218388	2.95739	0.001	59.167	40.38	48.366	2.67	9.16	2.269
	LOC108199346	non-functional NADPH-dependent codeinone reductase 2-like	2.94689	0.001	60.834	42.764	7.252	5.545	1.747	4.923
	LOC108196099	CASP-like protein 1F1	2.62938	0.001	51.643	33.415	39.667	6.122	4.336	7.821
	LOC108193650	1,4-dihydroxy-2-naphthoyl-CoA synthase, peroxisomal	2.42434	0.001	39.507	39.828	45.55	10.585	7.261	4.28
	LOC108225420	heat stress transcription factor A-3-like	2.40307	0.01	39.37	59.609	6.988	3.774	6.183	2.844
	LOC108219614	uncharacterized LOC108219614	2.39487	0.001	56.09	22.862	58.91	9.059	6.828	10.705
	LOC108210998	NEP1-interacting protein-like 1	2.32452	0.001	62.978	65.097	29.091	4.274	15.526	4.773
	LOC108211528	haloacid dehalogenase-like hydrolase domain-containing protein 3	2.2617	0.001	40.747	37.943	46.134	5.269	12.444	3.351
	LOC108205782	heat shock 70 kDa protein 18-like	2.24291	0.001	65.007	44.332	54.746	19.694	6.091	7.282
	LOC108227546	heparan-alpha-glucosaminide N-acetyltransferase	2.16998	0.05	66.271	23.885	74.317	8.926	9.084	13.447
	LOC108215351	AAA-ATPase At3g28580-like	2.05097	0.05	63.074	21.664	64.01	11.95	5.308	14.3
	LOC108216515	uncharacterized LOC108216515	2.04709	0.001	38.545	40.375	26.063	8.245	10.563	4.593
	LOC108215912	28 kDa ribonucleoprotein, chloroplastic	1.9033	0.001	43.402	65.486	55.773	16.863	17.043	7.703
	LOC108216127	heme-binding protein 2-like	1.88845	0.01	50.238	41.031	19.621	10.947	13.274	1.948
	cox3	cytochrome oxidase subunit 3	1.8654	0.05	50.051	38.854	38.401	2.455	1.37	20.125
	cox3	cytochrome oxidase subunit 3	1.8654	0.05	50.051	38.854	38.401	2.455	1.37	20.125
	cox3	cytochrome oxidase subunit 3	1.8654	0.05	50.051	38.854	38.401	2.455	1.37	20.125
	LOC108224332	BTB/POZ and TAZ domain-containing protein 1-like	1.72509	0.001	49.262	42.686	48.489	14.05	13.403	14.275
	LOC108202651	cell division control protein 48 homolog C-like	1.69705	0.01	44.352	21.9	38.042	11.869	9.046	10.239
	LOC108201970	uncharacterized LOC108201970	1.64775	0.01	46.71	42.865	45.644	8.958	18.181	13.121
	LOC108228087	pentatricopeptide repeat-containing protein At1g80270, mitochondrial-like	1.6283	0.001	50.216	59.027	43.507	19.213	15.895	13.285
	LOC108216461	WD repeat-containing protein 82-B	1.5588	0.01	47.372	28.618	35.633	19.376	11.713	7.33
	LOC108203115	translocase of chloroplast 159, chloroplastic-like	1.55078	0.05	64.152	34.076	46.667	21.36	13.785	14.309
	LOC108208911	translocase of chloroplast 159, chloroplastic-like	1.48712	0.01	39.237	25.015	44.186	16.804	9.938	11.613
	LOC108225109	thioredoxin-like 3-1, chloroplastic	1.46937	0.05	39.978	63.333	30.105	21.029	16.146	9.615
	LOC108193850	non-functional NADPH-dependent codeinone reductase 2-like	1.42566	0.05	55.947	30.399	29.368	10.666	10.023	20.049
	LOC108217565	uridine kinase-like protein 1, chloroplastic	1.33136	0.05	49.76	30.705	58.568	23.589	17.631	13.201
	LOC108219843	APO protein 2, chloroplastic	1.33112	0.05	34.949	35.585	33.479	11.992	18.932	8.831
	LOC108227523	eukaryotic translation initiation factor 3 subunit A-like	1.31567	0.05	58.838	36.07	47.086	29.274	10.861	17.398
	LOC108199585	2-methylene-furan-3-one reductase	1.30406	0.05	57.402	42.22	52.487	26.429	16.451	19.382
	LOC108214425	DNA topoisomerase 1-like	1.2947	0.01	43.716	39.307	51.142	25.815	14.288	15.013
	LOC108199415	guanylate-binding protein 4-like	1.27044	0.05	48.3	42.196	49.833	25.255	18.894	14.537
	LOC108218868	protein RRP6-like 1	1.20335	0.05	50.535	34.583	55.72	26.519	19.582	14.847
	LOC108204714	uncharacterized LOC108204714	1.1687	0.05	46.072	41.679	34.382	22.023	17.605	15.949
	LOC108222806	putative lysine-specific demethylase JMJ16	1.15401	0.05	44.994	29.863	48.17	25.157	16.213	19.294
	LOC108204428	putative rRNA methyltransferase	1.14128	0.05	52.768	34.033	53.732	24.384	22.988	16.221
	LOC108196060	guanylate-binding protein 4-like	1.11976	0.05	46.238	30.569	30.85	20.515	14.751	15.021
	LOC108210469	heat shock factor protein HSF24-like	1.10522	0.05	34.338	56.316	35.605	28.688	15.003	15.778
	LOC108223963	bZIP transcription factor 60-like	1.07445	0.05	42.09	34.447	50.188	22.841	19.465	17.729
	LOC108205894	protein PXR1-like	1.0412	0.05	36.659	53.011	58.897	27.196	22.397	21.974
26	LOC108224633	oxygen-evolving enhancer protein 1, chloroplastic	6.75505	0.001	176.628	103.168	406.408	0.976	0.789	1.646
	LOC108224860	chlorophyll a-b binding protein CP24 10A, chloroplastic-like	6.29704	0.001	113.793	132.286	250.574	1.447	1.953	0.934
	LOC108209961	chlorophyll a-b binding protein, chloroplastic-like	6.26665	0.001	312.877	87.519	161.076	1.422	1.792	0.999
	LOC108204554	signal recognition particle 43 kDa protein, chloroplastic	5.35152	0.001	141.557	114.088	281.752	3.591	4.179	1.213
	XLOC_013665		4.85459	0.001	242.974	93.905	424.887	3.341	5.439	7.543
	LOC108205052	glyceraldehyde-3-phosphate dehydrogenase A, chloroplastic	4.68603	0.001	150.527	101.382	198.174	6.773	4.66	1.07
	LOC108208531	ribulose bisphosphate carboxylase small chain 1B, chloroplastic-like	4.12559	0.001	164.662	114.079	254.985	8.56	10.711	3.777
	LOC108208532	ribulose bisphosphate carboxylase small chain 1B, chloroplastic-like	4.12559	0.001	164.662	114.079	254.985	8.56	10.711	3.777
	XLOC_010939		4.0689	0.001	140.661	53.165	207.69	5.269	6.135	5.546
	LOC108211573	calvin cycle protein CP12-1, chloroplastic-like	3.5921	0.001	248.742	58.061	224.677	6.834	17.815	3.627
	LOC108202781	transmembrane 9 superfamily member 1-like	3.40735	0.001	208.424	45.828	143.559	7.281	2.295	1.69
	LOC108203001	glyceraldehyde-3-phosphate dehydrogenase GAPC1, cytosolic	3.15918	0.001	210.082	100.378	224.986	30.367	9.19	13.461
	ccmC	cytochrome c biogenesis C	2.68769	0.001	243.622	74.728	171.281	7.133	5.094	37.463
	LOC108219447	glyceraldehyde-3-phosphate dehydrogenase B, chloroplastic-like	2.65702	0.001	125.232	129.367	260.047	16.109	36.051	2.547
	LOC108225821	sugar transporter ERD6-like 16	2.56315	0.001	192.188	119.064	183.043	16.59	26.09	31.243
	LOC108218591	elongation factor 1-alpha-like	2.51032	0.01	336.674	119.621	255.165	35.015	39.881	35.046
	LOC108201317	endoribonuclease Dicer homolog 2-like	2.26184	0.001	186.869	89.871	184.388	24.579	28.598	28.303

## Sheet: wcDEG.3 - S24
Cluster ID	Gene ID	Description	log2FoldChange	FDR≤	TPM
					Cultivated			Wild
					T3-2874B-8	T3-2874B-9	T3-2874B-10	T3-Dc615-8	T3-Dc615-9	T3-Dc615-10
1	LOC108215220	PHD finger protein ALFIN-LIKE 1-like	-1.05196	0.05	35.105	36.931	30.019	95.877	65.99	40.246
	LOC108219759	phosphoglycerate kinase, cytosolic-like	-1.05654	0.05	31.446	36.985	24.149	76.595	76.427	32.812
	LOC108227948	serine/threonine-protein kinase HT1	-1.10561	0.05	34.963	52.508	29.761	78.065	92.402	59.286
	LOC108219153	uncharacterized LOC108219153	-1.12503	0.05	28.471	33.192	25.694	66.513	62.141	45.844
	LOC108208764	phosphatidylinositol 4-kinase gamma 4-like	-1.14323	0.05	24.58	37.739	19.271	69.079	85.56	35.345
	LOC108215107	glucan endo-1,3-beta-glucosidase-like	-1.14336	0.05	30.911	22.233	39.257	82.658	94.021	52.045
	LOC108224796	E3 ubiquitin-protein ligase RNF5-like	-1.16423	0.05	28.695	38.892	23.347	58.734	71.638	52.29
	LOC108200052	protein phosphatase 2C 37	-1.16858	0.05	21.261	44.494	32.348	80.514	81.609	47.49
	LOC108200185	tetratricopeptide repeat protein 38	-1.18047	0.05	34.193	44.296	18.06	66.107	73.845	55.523
	LOC108194009	uncharacterized LOC108194009	-1.18962	0.05	25.729	31.74	21.449	52.798	70.592	41.66
	LOC108204299	uncharacterized LOC108204299	-1.34443	0.05	28.059	29.664	26.464	77.41	64.28	56.522
	LOC108208820	protein DETOXIFICATION 40-like	-1.34899	0.05	38.126	22.528	19.756	61.481	96.557	42.782
	LOC108197075	spermidine sinapoyl-CoA acyltransferase	-1.42935	0.01	30.053	34.385	17.244	83.752	101.125	32.078
	LOC108210666	uncharacterized LOC108210666	-1.47219	0.01	17.943	17.871	27.849	99.801	73.754	30.492
	LOC108205592	nudix hydrolase 25-like	-1.51395	0.01	21.166	20.244	14.082	52.885	70.359	29.122
	LOC108220132	probable WRKY transcription factor 70	-1.58116	0.001	25.761	26.99	23.314	74.992	86.735	53.306
	LOC108224838	syntaxin-121-like	-1.62993	0.01	30.014	26.816	8.976	110.16	76.572	28.997
	LOC108208895	alpha-glucan phosphorylase, H isozyme	-1.63042	0.05	9.378	11.892	22.366	76.454	73.695	14.013
	LOC108225006	WAT1-related protein At5g07050-like	-1.63513	0.01	30.701	21.941	11.473	85.969	67.148	43.174
	LOC108210565	arogenate dehydratase/prephenate dehydratase 6, chloroplastic	-1.71934	0.001	15.23	31.621	14.806	75.407	85.763	38.792
	LOC108215930	3-oxoacyl-[acyl-carrier-protein] reductase FabG-like	-1.73725	0.05	14.518	19.707	5.623	53.307	72.451	17.19
	LOC108199675	beta-glucosidase-like SFR2, chloroplastic	-1.74699	0.01	6.56	15.028	21.246	47.766	87.426	26.628
	LOC108223368	syntaxin-121	-1.77071	0.001	21.728	23.48	15.574	95.982	82.438	32.154
	LOC108209479	leucine-rich repeat receptor-like serine/threonine/tyrosine-protein kinase SOBIR1	-1.78183	0.01	16.609	29.942	11.083	107.538	83.578	23.087
	LOC108210757	soluble inorganic pyrophosphatase 4-like	-1.85156	0.001	15.603	13.103	22.653	64.565	74.706	49.878
	LOC108193794	two-component response regulator ARR5-like	-1.91975	0.001	9.583	14.486	22.446	81.433	83.477	30.235
	LOC108218609	uncharacterized LOC108218609	-1.98205	0.05	12.204	23.831	20.698	81.144	133.859	31.941
	LOC108225207	ethylene-responsive transcription factor 4-like	-2.13112	0.001	14.169	20.922	5.027	80.495	88.052	25.819
	LOC108205016	low affinity sulfate transporter 3-like	-2.18758	0.001	5.907	15.919	9.114	64.363	74.308	19.189
	LOC108204321	uncharacterized LOC108204321	-2.41251	0.001	3.947	9.902	10.487	47.952	85.67	23.312
	LOC108209382	methionine gamma-lyase	-2.74738	0.001	3.227	11.454	9.247	65.843	107.019	28.209
	LOC108200744	uncharacterized LOC108200744	-3.12119	0.001	4.852	9.788	3.013	53.325	83.777	37.265
2	LOC108226494	uncharacterized LOC108226494	-1.8761	0.05	19.489	38.007	43.757	280.943	90.558	65.748
	LOC108209180	BAG family molecular chaperone regulator 6	-2.04697	0.05	0.687	44.207	3.205	541.293	244.086	264.969
	LOC108215468	cytochrome P450 93A3-like	-2.3005	0.001	22.158	13.035	41.243	313.464	157.053	43.74
	LOC108197616	lipid transfer-like protein VAS	-2.46219	0.01	31.424	31.82	20.382	380.374	100.728	96.307
	LOC108206216	abrin-b-like	-2.68634	0.01	0.979	1.813	1.15	849.033	87.336	8.159
	LOC108225374	17.1 kDa class II heat shock protein-like	-2.74357	0.01	4.139	26.897	31.222	371.157	58.194	222.677
	LOC108198511	uncharacterized LOC108198511	-2.74778	0.001	28.703	81.074	38.393	577.13	270.861	157.582
	LOC108202000	defensin-like protein 1	-2.78794	0.01	4.241	22.661	8.189	275.338	133.61	14.771
	LOC108222175	26.5 kDa heat shock protein, mitochondrial	-3.02702	0.01	6.987	5.696	37.209	514.977	56.583	252.835
	LOC108202532	glucose-1-phosphate adenylyltransferase large subunit 1-like	-4.13216	0.001	3.227	9.071	15.178	409.943	317.578	92.782
3	LOC108209021	putative disease resistance RPP13-like protein 1	3.44766	0.001	12.28	5.355	12.446	0.909	0.219	0.508
	LOC108195848	protein NRT1/ PTR FAMILY 5.2-like	3.29164	0.001	8.122	9.601	15.235	1.739	2.508	1.878
	LOC108222783	beta-galactosidase-like	2.8582	0.001	15.022	11.204	5.652	1.88	0.845	0.463
	LOC108204392	TMV resistance protein N-like	2.26755	0.001	8.818	8.328	8.035	1.127	2.121	0.958
	LOC108209548	uncharacterized LOC108209548	2.21258	0.01	4.292	5.458	8.987	1.734	0.978	0.416
	LOC108208898	probable GTP-binding protein OBGM, mitochondrial	2.20778	0.001	5.699	8.542	4.582	1.599	0.99	0.509
	LOC108201493	hypothetical protein	2.04098	0.001	3.018	2.718	4.352	0.429	0.743	0.269
	LOC108193525	probable inactive poly [ADP-ribose] polymerase SRO5	2.02727	0.001	9.529	11.639	11.566	3.095	1.502	1.632
	LOC108210287	pectin acetylesterase 12-like	2.01558	0.05	13.597	7.548	14.507	3.103	2.625	1.206
	LOC108213032	pollen-specific protein SF21-like	1.98136	0.01	12.526	11.003	15.621	15.613	3.258	8.5
	LOC108214508	probable alpha,alpha-trehalose-phosphate synthase [UDP-forming] 7	1.93578	0.01	2.179	3.835	4.007	1.106	0.601	0.333
	LOC108223444	uncharacterized LOC108223444	1.86861	0.001	7.455	6.358	7.549	1.193	2.214	1.072
	LOC108223707	ABC transporter C family member 3-like	1.84649	0.01	6.041	5.29	2.861	1.308	1.183	0.567
	LOC108211652	probable chlorophyll(ide) b reductase NYC1, chloroplastic	1.83796	0.01	4.725	8.125	6.506	2.751	0.887	0.697
	LOC108205867	pentatricopeptide repeat-containing protein At5g04780-like	1.83562	0.01	8.221	8.833	3.598	2.124	1.139	1.099
	LOC108212600	ABC transporter B family member 26, chloroplastic-like	1.83438	0.05	7.854	3.733	6.202	2.071	1.36	0.538
	LOC108214503	putative disease resistance protein RGA4	1.83376	0.05	14.651	12.937	3.828	5.059	0.852	0.493
	LOC108219173	two pore calcium channel protein 1B-like	1.82176	0.01	9.428	6.449	5.487	1.673	2.009	0.927
	LOC108219967	putative hydrolase C777.06c	1.77764	0.01	6.469	12.072	9.404	2.514	2.692	0.896
	LOC108214146	RINT1-like protein MAG2	1.74857	0.05	3.651	7.3	10.049	1.429	1.553	1.283
	LOC108200430	uncharacterized LOC108200430	1.74745	0.01	5.9	3.805	5.92	1.217	1.503	0.771
	LOC108223333	F-box/kelch-repeat protein At3g23880-like	1.67521	0.05	7.569	6.017	9.88	2.98	2.015	0.948
	LOC108210860	putative 12-oxophytodienoate reductase 11	1.64775	0.05	9.17	8.273	13.45	4.885	5.785	2.514
	LOC108206868	cytochrome P450 71A9-like	1.6417	0.05	10.028	7.786	5.722	2.589	1.469	1.646
	LOC108199868	phosphoinositide phosphatase SAC8	1.5826	0.05	10.3	15.019	9.059	5.744	2.953	1.831
	LOC108197292	beta-glucuronosyltransferase GlcAT14A	1.57678	0.05	8.773	8.085	5.039	2.294	2.299	1.107
	LOC108224245	uncharacterized LOC108224245	1.57015	0.05	9.904	9.258	14.517	4.468	2.451	2.327
	LOC108200936	pentatricopeptide repeat-containing protein At1g05600	1.53759	0.05	4.263	5.487	7.175	3.095	1.028	0.811
	LOC108210705	OTU domain-containing protein 3	1.5247	0.05	6.712	11.118	7.585	2.27	3.044	1.552
	LOC108220170	3-oxoacyl-[acyl-carrier-protein] synthase III, chloroplastic-like	1.49452	0.05	8.191	6.897	7.718	2.052	3.03	1.263
	LOC108220067	transcription factor bHLH66	1.49169	0.05	10.043	8.164	7.03	1.382	3.026	2.073
	LOC108205225	protein ROS1-like	1.49134	0.05	2.937	4.069	2.073	0.853	0.98	0.598
	LOC108224531	AAA-ATPase At5g57480	1.47962	0.05	7.107	11.128	10.42	6.092	1.998	0.726
	LOC108209317	uncharacterized LOC108209317	1.4783	0.05	13.175	9.147	11.505	4.711	4.202	1.398
	LOC108215295	dicarboxylate transporter 2.1, chloroplastic-like	1.47734	0.05	7.667	4.335	7.155	3.057	2.064	0.745
	LOC108226114	TVP38/TMEM64 family membrane protein slr0305-like	1.46715	0.05	8.608	5.696	10.403	4.759	1.427	1.266
	LOC108201563	TMV resistance protein N-like	1.46467	0.05	10.09	9.314	3.715	3.794	2.276	0.666
	LOC108214041	uncharacterized LOC108214041	1.45499	0.05	5.233	9.553	8.241	2.184	12.075	9.201
	LOC108223258	protein VTE6, chloroplastic	1.41996	0.05	14.38	10.939	9.503	6.647	4.001	3.785
	LOC108209794	protein MALE DISCOVERER 2-like	1.38356	0.05	3.169	5.155	3.452	1.6	1.544	0.619
	LOC108215351	AAA-ATPase At3g28580-like	1.31712	0.05	10.921	11.696	10.496	4.976	2.506	3.223
	LOC108227900	GBF-interacting protein 1-like	1.31353	0.05	5.824	6.234	6.778	2.053	2.206	1.835
	LOC108204368	CRM-domain containing factor CFM2, chloroplastic	1.22943	0.05	6.606	9.416	9.529	3.758	3.306	2.124
	LOC108194630	cryptochrome-1-like	1.22808	0.05	8.914	7.545	8.651	3.923	4.034	1.378
	LOC108196150	protein SCAR4	1.22024	0.05	7.242	7.585	7.131	4.192	3.312	1.172
	LOC108214851	AUGMIN subunit 5	1.21437	0.05	12.82	12.888	8.385	5.287	4.284	2.822
	LOC108219148	TPR repeat-containing thioredoxin TTL1-like	1.16851	0.05	11.394	12.528	10.853	5.656	5.785	1.942
	LOC108195949	CCR4-NOT transcription complex subunit 1-like	1.14701	0.05	11.236	10.671	14.145	8.932	2.803	2.444
	LOC108209201	branchpoint-bridging protein-like	1.14026	0.05	10.654	11.844	9.356	2.744	5.758	2.972
	LOC108222902	uncharacterized LOC108222902	1.10188	0.05	7.202	11.118	9.171	3.034	5.41	2.104
	LOC108223606	probable LRR receptor-like serine/threonine-protein kinase At4g26540	-1.12714	0.05	7.411	8.304	3.434	19.2	11.441	9.202
	LOC108199952	receptor like protein kinase S.2-like	-1.15942	0.05	9.976	9.068	6.133	28.269	17.993	9.547
	LOC108209898	vacuolar amino acid transporter 1-like	-1.20762	0.05	9.008	17.969	6.54	24.727	32.76	15.468
	LOC108219944	(-)-alpha-terpineol synthase-like	-1.21014	0.05	8.11	12.213	8.426	27.252	19.98	21.22
	LOC108204624	tetratricopeptide repeat protein 7B-like	-1.21743	0.05	9.631	6.761	6.372	33.358	15.201	7.337
	LOC108218567	uncharacterized LOC108218567	-1.22216	0.05	6.807	7.871	5.864	17.081	12.556	14.059
	LOC108209279	probable receptor-like protein kinase At2g39360	-1.23333	0.05	3.204	6.269	4.347	14.094	12.704	5.541
	LOC108219226	DIS3-like exonuclease 2	-1.23866	0.05	9.17	11.982	6.371	31.38	14.824	15.528
	LOC108205426	vesicle-associated protein 2-2-like	-1.24428	0.05	8.98	10.918	7.795	30.624	21.887	11.915
	LOC108194015	thaumatin-like protein 1b	-1.25825	0.05	6.756	11.204	8.568	25.546	24.102	12.371
	LOC108199623	tRNA wybutosine-synthesizing protein 2/3/4	-1.26423	0.05	9.335	13.801	5.165	26.844	19.461	16.277
	LOC108223694	glycosyltransferase family protein 64 protein C5	-1.26695	0.05	5.208	5.961	3.978	16.022	11.94	7.053
	LOC108214135	proline--tRNA ligase, chloroplastic/mitochondrial	-1.2753	0.05	4.36	5.039	5.663	17.568	9.953	8.712
	LOC108219530	U-box domain-containing protein 40-like	-1.29483	0.05	10.309	5.703	7.47	17.366	20.634	16.604
	LOC108192790	vacuolar protein 8	-1.30651	0.05	6.697	8.553	5.282	26.32	20.9	5.99
	LOC108199787	protein-tyrosine-phosphatase MKP1-like	-1.31022	0.01	8.187	13.466	7.494	27.607	22.986	16.47
	LOC108224106	OTU domain-containing protein At3g57810-like	-1.31152	0.05	11.706	10.774	6.344	37.206	16.505	13.061
	LOC108214187	malonyl-coenzyme A:anthocyanin 3-O-glucoside-6''-O-malonyltransferase-like	-1.31271	0.05	7.47	6.958	4.643	8.257	18.812	15.94
	LOC108219097	VIN3-like protein 2	-1.31661	0.05	7.754	11.838	3.852	29.066	18.51	9.763
	LOC108200117	scarecrow-like protein 9	-1.3183	0.05	2.519	7.845	2.14	13.728	8.129	8.158
	LOC108199878	anaphase-promoting complex subunit 7	-1.3212	0.05	7.78	12.569	4.513	27.492	16.393	14.759
	LOC108206148	uncharacterized LOC108206148	-1.35375	0.05	2.37	3.977	1.958	7.33	5.031	7.178
	LOC108207191	zinc finger CCCH domain-containing protein 32	-1.35502	0.05	8.543	8.218	5.812	22.746	14.362	16.588
	LOC108209613	sporozoite surface protein 2-like	-1.36269	0.05	2.996	11.224	4.105	31.221	13.5	8.843
	LOC108205594	serine/threonine-protein kinase STY46	-1.36938	0.05	10.143	8.719	1.928	26.74	13.711	14.328
	LOC108223802	glutamate receptor 3.5-like	-1.38049	0.05	3.029	5.673	2.214	16.797	9.169	3.934
	LOC108219667	probable protein phosphatase 2C 38	-1.38142	0.05	8.102	9.272	2.78	20.411	9.922	13.674
	LOC108216628	phospholipase ABHD3-like	-1.3816	0.05	4.413	4.892	3.42	14.134	15.806	4.325
	LOC108195818	MAR-binding filament-like protein 1-1	-1.38175	0.05	1.41	1.762	1.81	7.518	3.595	2.695
	LOC108205884	protein TRIGALACTOSYLDIACYLGLYCEROL 3, chloroplastic	-1.39171	0.05	1.598	2.842	2.077	6.875	8.5	2.67
	LOC108197131	dnaJ homolog subfamily B member 5-like	-1.39671	0.05	12.479	10.797	3.448	33.906	21.016	15.332
	LOC108220397	probable protein phosphatase 2C 49	-1.40911	0.05	9.665	11.812	2.615	28.675	23.072	12.048
	LOC108202554	TMV resistance protein N	-1.41324	0.05	2.24	2.048	4.188	8.749	10.344	4.789
	LOC108220908	uncharacterized LOC108220908	-1.41491	0.05	6.459	4.488	13.373	23.238	22.294	21.989
	LOC108211676	metal tolerance protein 4-like	-1.41554	0.05	2.83	3.206	2.902	14.528	7.164	4.141
	LOC108196608	DEAD-box ATP-dependent RNA helicase 13	-1.43342	0.01	8.888	11.349	4.726	34.475	16.531	15.075
	LOC108200672	probable polyamine transporter At1g31830	-1.43413	0.05	2.656	3.989	4.958	8.587	11.842	9.867
	LOC108206036	13 kDa ribonucleoprotein-associated protein-like	-1.44326	0.05	7.702	4.778	5.556	32.648	19.338	27.967
	LOC108199720	ankyrin repeat-containing protein At3g12360-like	-1.44695	0.05	4.172	6.461	3.168	18.456	11.996	5.984
	LOC108192737	uncharacterized LOC108192737	-1.44857	0.05	7.633	4.259	4.654	14.193	5.032	1.881
	LOC108227442	E3 ubiquitin ligase BIG BROTHER-related	-1.45207	0.05	4.44	6.243	2.17	20.372	13.555	5.295
	LOC108218508	AAA-ATPase At3g50940-like	-1.45316	0.05	6.394	4.157	9.689	28.781	21.167	10.778
	LOC108225770	protein IRX15-LIKE-like	-1.45597	0.05	1.785	1.782	2.526	9.025	8.376	2.064
	LOC108207467	uncharacterized LOC108207467	-1.45831	0.05	1.673	1.016	1.254	5.464	3.569	1.908
	LOC108217747	UDP-glycosyltransferase 89B2-like	-1.45857	0.05	4.154	2.845	1.429	6.454	12.79	4.513
	LOC108214822	TMV resistance protein N-like	-1.46403	0.05	1.97	2.073	0.703	3.906	7.38	2.237
	LOC108220049	protein IQ-DOMAIN 1-like	-1.46687	0.05	2.717	3.235	2.396	16.241	6.678	3.242
	LOC108205611	AUGMIN subunit 4-like	-1.46906	0.05	4.522	6.655	4.391	9.504	16.643	10.283
	LOC108206515	uncharacterized LOC108206515	-1.473	0.05	11.491	9.141	8.107	28.015	29.306	19.284
	LOC108218778	uncharacterized LOC108218778	-1.47622	0.05	3.508	10.853	3.131	25.249	13.407	10.347
	LOC108209345	putative multidrug resistance protein	-1.47636	0.05	3.811	3.522	2.237	12.405	12.882	3.163
	LOC108220804	protein enabled homolog	-1.47805	0.05	6.614	5.718	4.19	30.476	14.961	5.899
	LOC108196594	formin-like protein 1	-1.48596	0.05	5.54	2.678	1.684	10.426	12.672	5.399
	LOC108203038	uncharacterized LOC108203038	-1.48621	0.01	7.561	7.085	10.987	19.84	28.573	16.947
	LOC108219465	leucine-rich repeat extensin-like protein 5	-1.48726	0.05	1.767	2.776	2.333	6.521	11.749	2.853
	LOC108216723	uncharacterized LOC108216723	-1.49543	0.05	11.741	3.348	5.582	18.501	23.09	18.852
	LOC108204648	probable receptor-like protein kinase At5g47070	-1.49895	0.05	3.916	4.833	1.997	17.73	10.63	4.202
	LOC108194326	zinc finger protein 6-like	-1.49921	0.05	7.026	4.447	8.068	21.694	19.754	14.652
	LOC108209491	uncharacterized membrane protein At1g16860	-1.50268	0.05	3.368	4.602	6.47	9.303	19.942	12.626
	LOC108205794	perakine reductase-like	-1.50732	0.05	5.705	6.885	6.959	17.515	28.859	10.108
	LOC108216479	putative calcium-binding protein CML19	-1.50747	0.05	3.464	5.663	4.245	19.989	18.256	4.37
	LOC108220096	protein indeterminate-domain 9-like	-1.51449	0.01	8.974	7.9	8.964	38.775	16.485	19.107
	LOC108199680	uncharacterized LOC108199680	-1.51649	0.01	4.972	5.342	4.306	15.126	11.02	12.667
	LOC108209573	polygalacturonase QRT3-like	-1.51914	0.05	2.219	1.397	2.888	8.868	6.432	4.54
	LOC108218439	4-alpha-glucanotransferase DPE2	-1.52154	0.01	3.335	6.713	4.531	9.148	21.281	10.233
	LOC108202279	receptor-like protein kinase HSL1	-1.52269	0.05	4.266	3.518	0.891	16.893	7.709	3.757
	LOC108220493	putative glucose-6-phosphate 1-epimerase	-1.53025	0.05	3.226	4.491	3.817	18.382	13.778	4.543
	LOC108210578	coronatine-insensitive protein 1-like	-1.53499	0.05	4.376	2.727	2.853	17.707	8.715	4.846
	LOC108195979	protein NEOXANTHIN-DEFICIENT 1	-1.53632	0.05	8.224	8.623	4.197	30.042	19.237	11.805
	LOC108206968	probable mitochondrial-processing peptidase subunit beta, mitochondrial	-1.54335	0.05	3.915	3.772	1.381	5.013	10.264	9.604
	LOC108210034	protein EMBRYONIC FLOWER 1-like	-1.54359	0.01	4.162	3.722	2.174	9.921	7.087	10.34
	LOC108193311	protein indeterminate-domain 9-like	-1.54963	0.05	0.87	1.551	1.624	6.243	4.038	2.508
	LOC108197076	beta-1,4-mannosyl-glycoprotein 4-beta-N-acetylglucosaminyltransferase-like	-1.56342	0.01	6.823	6.363	6.289	14.904	30.249	12.273
	LOC108200695	uncharacterized LOC108200695	-1.57172	0.05	1.88	1.162	1.826	4.975	9.481	2.457
	LOC108196101	zinc finger MYND domain-containing protein 15	-1.5763	0.05	0.525	0.788	1.261	11.371	8.129	9.251
	LOC108200408	CBL-interacting serine/threonine-protein kinase 7	-1.57875	0.05	2.612	7.356	1.785	17.026	13.837	5.965
	LOC108205178	mitochondrial pyruvate carrier 4-like	-1.58168	0.05	7.28	4.273	3.665	5.021	15.811	11.929
	LOC108217729	protein mago nashi homolog	-1.5828	0.05	2.788	5.219	5.448	7.449	13.391	18.966
	LOC108210760	uncharacterized LOC108210760	-1.58301	0.05	6.721	7.042	2.64	21.452	22.158	7.25
	LOC108211196	uncharacterized protein At5g02240-like	-1.58778	0.05	1.995	2.673	2.478	9.377	10.924	3.455
	LOC108215108	fasciclin-like arabinogalactan protein 15	-1.59171	0.05	7.343	1.87	4.527	30.417	14.61	5.902
	LOC108197197	protein phosphatase 1 regulatory subunit 12A-like	-1.59621	0.05	3.243	2.494	3.608	18.177	8.999	4.597
	LOC108221942	thiosulfate sulfurtransferase 18-like	-1.59752	0.05	3.582	2.158	6.104	29.975	11.556	6.161
	LOC108197270	expansin-A4	-1.60011	0.05	7.554	2.261	3.524	18.839	10.648	12.977
	LOC108225192	nucleoside diphosphate kinase 2, chloroplastic	-1.60711	0.05	2.656	4.538	8.46	18.405	20.535	12.713
	LOC108209052	protein UPSTREAM OF FLC	-1.61484	0.01	4.03	4.047	3.202	15.427	13.199	6.398
	LOC108214349	uncharacterized LOC108214349	-1.61559	0.05	2.224	3.572	3.556	7.55	9.081	11.561
	LOC108210280	3-oxoacyl-[acyl-carrier-protein] synthase I, chloroplastic-like	-1.6236	0.01	5.977	6.246	3.731	28.883	15.747	7.567
	LOC108196849	U-box domain-containing protein 44-like	-1.62376	0.01	2.369	3.391	2.597	11.146	10.234	4.577
	LOC108215619	phospholipid-transporting ATPase 1-like	-1.65129	0.05	0.291	0.353	1.371	2.653	2.201	2.262
	LOC108211101	heat shock protein 83	-1.65301	0.05	3.551	9.432	7.55	15.554	18.571	27.258
	LOC108195521	probable calcium-binding protein CML18	-1.65461	0.05	4.823	4.54	4.326	13.407	20.551	9.92
	LOC108219878	uncharacterized LOC108219878	-1.65755	0.05	1.803	0.456	2.041	6.909	5.074	4.271
	LOC108223996	poly [ADP-ribose] polymerase 1	-1.65928	0.01	4.86	2.413	3.209	18.829	8.828	7.498
	LOC108219778	homeobox-leucine zipper protein GLABRA 2-like	-1.65981	0.01	5.517	4.351	1.21	17.515	8.685	9.807
	LOC108210781	uncharacterized LOC108210781	-1.66292	0.05	1.553	2.632	3.197	16.578	6.189	3.916
	LOC108198700	dehydration-responsive element-binding protein 3-like	-1.66348	0.05	6.748	2.562	1.473	15.615	14.515	7.05
	LOC108193239	21 kDa protein	-1.66705	0.05	3.95	1.602	7.87	35.903	11.042	10.075
	LOC108204758	paramyosin-like	-1.68518	0.05	1.141	0.544	0.69	5.719	3.098	0.868
	LOC108195917	methylesterase 10-like	-1.68699	0.01	5.865	7.643	4.45	12.963	27.458	15.587
	LOC108201885	AT-hook motif nuclear-localized protein 23-like	-1.69515	0.01	6.386	8.747	2.561	24.057	26.497	9.021
	LOC108225739	cysteine proteinase RD21A-like	-1.69558	0.01	5.245	7.737	10.063	34.181	23.694	18.509
	LOC108225600	lipid phosphate phosphatase epsilon 2, chloroplastic-like	-1.69648	0.05	2.769	2.072	7.543	20.84	13.006	12.971
	LOC108219064	probable serine/threonine-protein kinase Cx32, chloroplastic	-1.69879	0.01	3.487	5.397	6.105	24.368	19.783	8.126
	LOC108197108	protein kish	-1.69916	0.05	1.057	1.159	2.032	8.947	4.074	2.656
	LOC108220689	NAC domain-containing protein 100	-1.70246	0.05	6.502	7.568	1.349	26.724	12.952	13.164
	LOC108209900	ankyrin repeat domain-containing protein 13C	-1.71005	0.001	6.531	7.085	3.914	18.789	20.655	16.336
	LOC108194047	nuclear transcription factor Y subunit A-3	-1.72172	0.01	2.408	8.164	4.49	26.986	14.287	9.168
	LOC108193910	perakine reductase-like	-1.72247	0.01	6.732	9.825	4.005	34.698	23.58	11.678
	LOC108205583	probable uridine nucleosidase 2	-1.73467	0.01	3.037	5.357	3.384	9.702	15.987	12.057
	LOC108220585	protein Brevis radix-like 2	-1.74594	0.01	0.84	1.294	0.992	3.132	3.996	3.596
	LOC108213251	14 kDa zinc-binding protein	-1.74694	0.05	8.513	9.522	2.294	36.468	27.763	10.79
	LOC108200272	putative polyol transporter 1	-1.75579	0.01	4.184	2.958	1.19	6.726	16.125	6.484
	LOC108193451	polygalacturonase 1 beta-like protein 3	-1.76018	0.01	4.961	3.543	3.263	15.536	14.796	9.042
	LOC108206244	nudix hydrolase 14, chloroplastic	-1.76183	0.01	4.713	6.684	4.414	20.826	16.386	14.343
	LOC108194279	acyl-CoA-binding domain-containing protein 5-like	-1.76245	0.01	3.906	2.276	2.015	12.624	11.872	4.962
	LOC108197175	cysteine-rich receptor-like protein kinase 2	-1.773	0.01	5.053	5.186	2.829	27.858	15.375	6.012
	LOC108192584	putative phospholipid:diacylglycerol acyltransferase 2	-1.78465	0.05	0.776	0.469	0.771	5.579	1.677	1.506
	LOC108205653	2-oxoglutarate-dependent dioxygenase DAO-like	-1.78469	0.01	4.917	4.884	4.665	11.805	27.819	10.816
	LOC108206845	protein LIGHT-DEPENDENT SHORT HYPOCOTYLS 3-like	-1.79155	0.01	8.888	11.222	2.56	25.003	21.678	29.735
	LOC108192980	tRNA-dihydrouridine(47) synthase [NAD(P)(+)]-like	-1.79872	0.05	2.94	5.328	1.961	24.46	9.084	5.975
	LOC108198571	disease resistance protein RML1B-like	-1.80315	0.05	1.158	0.566	4.898	12.039	10.402	1.34
	LOC108225195	deacetylvindoline O-acetyltransferase-like	-1.80529	0.05	1.845	1.258	2.593	16.173	6.967	2.677
	LOC108200111	glucan endo-1,3-beta-glucosidase 13	-1.80563	0.01	4	2.401	2.632	16.609	10.144	7.219
	LOC108209169	probable WRKY transcription factor 53	-1.82122	0.01	4.148	5.038	1.843	18.877	17.855	5.724
	LOC108227092	probable LRR receptor-like serine/threonine-protein kinase At2g16250	-1.82157	0.01	2.755	4.529	1.692	18.386	10.532	5.046
	LOC108220121	9-cis-epoxycarotenoid dioxygenase NCED1, chloroplastic-like	-1.83045	0.01	2.019	4.764	2.787	17.796	9.162	8.267
	LOC108216578	disease resistance protein At4g27190-like	-1.83104	0.05	1.656	0.391	0.718	8.639	3.52	1.058
	LOC108212028	peptidyl-prolyl cis-trans isomerase CYP28, chloroplastic-like	-1.83457	0.05	4.123	3.029	2.353	25.344	8.231	5.899
	LOC108206820	ACD11 homolog protein	-1.85195	0.01	2.095	1.347	2.09	10.085	12.345	2.518
	LOC108208475	respiratory burst oxidase homolog protein B-like	-1.85371	0.01	3.056	3.187	1.051	17.357	9.351	3.327
	LOC108197620	uncharacterized LOC108197620	-1.86822	0.01	1.297	1.172	1.728	8.179	5.384	3.622
	LOC108209088	protein LOL1	-1.87147	0.01	6.009	2.951	2.463	28.723	13.309	7.4
	LOC108198001	bifunctional epoxide hydrolase 2-like	-1.87746	0.01	3.208	1.873	2.953	22.732	7.699	5.706
	LOC108205108	deacetylvindoline O-acetyltransferase-like	-1.8895	0.01	2.47	3.49	1.839	12.035	12.183	5.689
	LOC108211301	transcription factor bHLH93-like	-1.88989	0.05	2.41	1.425	2.162	16.053	11.93	1.89
	LOC108210655	uncharacterized LOC108210655	-1.89042	0.01	2.207	3.026	2.425	15.961	10.95	4.165
	LOC108213743	GATA transcription factor 5-like	-1.90144	0.001	5.8	4.824	4.875	25.231	17.34	14.911
	LOC108215185	probable beta-D-xylosidase 7	-1.90232	0.05	1.527	1.208	1.251	13.112	5.955	1.218
	LOC108214287	2-C-methyl-D-erythritol 4-phosphate cytidylyltransferase, chloroplastic	-1.90318	0.01	4.63	2.75	4.411	18.731	16.86	10.566
	LOC108205748	probable transcription factor KAN2	-1.90399	0.001	3.8	3.623	5.34	17.151	19.096	12.405
	LOC108201994	putative E3 ubiquitin-protein ligase LIN	-1.91273	0.05	2.766	2.169	1.3	17.975	9.744	2.051
	LOC108214602	secoisolariciresinol dehydrogenase-like	-1.91674	0.01	2.287	7.174	2.027	27.025	12.117	9.177
	LOC108205885	uncharacterized LOC108205885	-1.94878	0.05	0.481	2.054	1.171	8.997	8.878	1.178
	LOC108196010	uncharacterized LOC108196010	-1.96018	0.05	1.129	1.113	0.92	10.324	3.784	1.58
	LOC108206919	two-pore potassium channel 3-like	-1.96611	0.01	2.847	1.501	2.681	6.364	11.325	10.064
	LOC108224884	vesicle-associated protein 2-2-like	-1.9827	0.05	3.451	1.283	2.229	27.777	13.306	1.815
	LOC108203023	acetylglutamate kinase-like	-1.98416	0.01	5.073	2.797	7.896	20.288	26.617	21.319
	LOC108205981	protein CHUP1, chloroplastic-like	-1.99833	0.01	0.7	0.449	1.944	6.297	5.435	3.789
	LOC108215172	uncharacterized LOC108215172	-2.00194	0.01	1.434	2.277	1.804	16.438	6.797	3.447
	LOC108201955	chaperone protein dnaJ 6-like	-2.00549	0.01	2.171	3.527	3.166	12.214	12.525	19.483
	LOC108211748	protein IRX15-LIKE	-2.01977	0.05	5.336	4.055	4.155	44.031	13.273	9.177
	LOC108209129	cellulose synthase-like protein G2	-2.03899	0.001	3.804	3.546	4.821	30.492	17.693	8.218
	LOC108209519	uncharacterized LOC108209519	-2.04036	0.05	2.014	2.967	2.111	15.656	19.356	2.514
	LOC108203154	uncharacterized LOC108203154	-2.07468	0.001	1.446	5.002	1.405	17.568	12.391	6.371
	LOC108225439	protein BOBBER 2-like	-2.11795	0.05	3.774	2.9	4.883	45.318	10.96	10.385
	LOC108216379	probable receptor-like serine/threonine-protein kinase At5g57670	-2.12992	0.01	0.712	0.813	1.433	9.378	5.536	2.132
	LOC108209769	uncharacterized LOC108209769	-2.13231	0.001	1.001	2.895	1.248	11.911	6.203	5.833
	LOC108205908	reticuline oxidase-like protein	-2.14213	0.01	1.648	1.169	3.185	10.703	11.174	8.311
	LOC108225052	pectate lyase-like	-2.15264	0.01	1.334	1.01	1.646	15.429	6.929	2.168
	LOC108211614	tropinone reductase homolog At5g06060-like	-2.15408	0.001	3.462	9.669	4.766	14.97	41.61	25.567
	LOC108211104	protein indeterminate-domain 2-like	-2.17587	0.001	2.437	1.164	1.877	17.778	9.24	3.836
	LOC108194103	homeobox protein 12	-2.23185	0.001	7.332	2.33	2.948	33.947	24.894	11.803
	LOC108215607	senescence-associated carboxylesterase 101-like	-2.2394	0.05	3.569	4.712	1.799	39.159	18.85	4.076
	LOC108228126	squamosa promoter-binding-like protein 9	-2.27302	0.001	2.871	4.045	1.399	30.158	30.097	5.761
	LOC108208026	uncharacterized WD repeat-containing protein alr2800-like	-2.32889	0.001	4.254	2.915	0.969	22.4	13.688	10.053
	LOC108216585	uncharacterized LOC108216585	-2.32968	0.01	4.218	2.997	5.53	43.784	17.01	8.138
	LOC108211806	NAC domain-containing protein 90	-2.33544	0.001	1.227	0.932	1.687	4.635	12.716	6.428
	LOC108203083	3-ketoacyl-CoA synthase 11	-2.33935	0.01	1.818	2.126	1.009	7.041	16.682	4.926
	LOC108202570	putative serine carboxypeptidase-like 23	-2.35967	0.01	5.312	1.428	2.061	43.416	15.649	6.17
	LOC108210538	uncharacterized LOC108210538	-2.38434	0.001	1.643	0.969	3.655	24.437	25.199	3.365
	LOC108205352	protein WVD2-like 7	-2.39799	0.001	0.916	1.183	1.006	9.514	5.83	3.569
	LOC108205934	uncharacterized LOC108205934	-2.40695	0.001	1.023	2.235	1.605	16.564	10.227	5.819
	LOC108220290	uncharacterized protein At4g14100-like	-2.43341	0.001	1.564	2.184	2.75	9.78	15.915	13.639
	LOC108196758	copper methylamine oxidase-like	-2.4623	0.001	0.595	0.883	0.794	5.11	8.466	1.857
	LOC108210874	transcription factor DIVARICATA	-2.47673	0.05	1.944	2.275	1.131	9.44	23.841	6.328
	LOC108215113	putative polyol transporter 1	-2.51134	0.001	4.447	3.668	2.076	11.826	20.408	27.201
	LOC108225740	scopoletin glucosyltransferase-like	-2.52983	0.001	3.478	3.932	3.894	21.839	38.765	11.921
	LOC108201159	protein NUCLEAR FUSION DEFECTIVE 4-like	-2.54118	0.001	1.498	0.485	2.372	7.379	20.566	7.547
	LOC108220060	peroxidase A2-like	-2.54204	0.05	1.881	0.666	1.46	45.929	1.133	5.721
	LOC108219274	xyloglucan glycosyltransferase 4-like	-2.55143	0.05	4.016	4.448	2.695	27.497	46.344	7.058
	LOC108225404	F-box/kelch-repeat protein At3g27150	-2.56329	0.001	1.817	5.003	2.469	17.085	18.643	20.791
	LOC108206821	purple acid phosphatase 2-like	-2.60262	0.001	1.027	0.687	1.199	14.529	6.563	3.122
	LOC108220765	peroxidase A2-like	-2.63653	0.001	1.207	1.817	1.295	12.798	17.362	4.2
	LOC108215674	putative disease resistance RPP13-like protein 3	-2.64008	0.001	2.453	3.349	3.41	15.327	18.372	17.042
	LOC108195817	uncharacterized LOC108195817	-2.69574	0.001	0.826	4.014	2.247	32.911	29.408	4.567
	LOC108207894	ATPase ASNA1 homolog	-2.69725	0.001	3.21	1.38	2.628	25.755	12.363	16.389
	LOC108209610	phosphoenolpyruvate/phosphate translocator 2, chloroplastic-like	-2.83814	0.001	0.986	1.139	1.273	18.892	8.038	4.942
	LOC108211076	nudix hydrolase 20, chloroplastic-like	-2.84078	0.001	2.695	2.734	2.242	20.762	21.181	14.98
	LOC108211578	glucan endo-1,3-beta-glucosidase-like	-2.8443	0.05	1.514	0.906	1.254	8.696	26.878	4.283
	LOC108221799	monoterpene synthase-like	-2.87065	0.05	0.817	1.313	1.568	29.492	6.416	5.128
	LOC108215848	kinesin-like protein KIN-4C	-2.8957	0.001	0.305	0.526	0.527	7.757	6.402	1.665
	LOC108203869	phospholipase A1-Igamma1, chloroplastic	-2.93265	0.001	3.742	0.813	1.512	31.215	30.032	7.134
	LOC108194127	syntaxin-related protein KNOLLE-like	-3.06889	0.001	1.944	1.149	1.666	23.688	16.694	12.161
	LOC108227416	(R,S)-reticuline 7-O-methyltransferase-like	-3.15381	0.001	3.079	2.335	1.771	18.481	47.581	13.484
	LOC108193210	phosphoinositide phospholipase C 2-like	-3.16785	0.001	1.372	1.428	1.658	20.151	21.128	7.237
	LOC108211695	DELLA protein GAI-like	-3.29615	0.001	1.609	1.259	1.32	25.41	21.854	6.435
	LOC108217508	G-type lectin S-receptor-like serine/threonine-protein kinase At2g19130	-3.29723	0.001	0.552	0.949	0.602	17.439	6.68	3.957
4	LOC108201389	molybdopterin synthase sulfur carrier subunit	-1.17321	0.05	39.284	66.848	25.322	131.905	99.176	49.871
	LOC108204987	uncharacterized LOC108204987	-1.21595	0.05	31.225	33.946	37.121	127.716	75.805	41.989
	LOC108209901	S-adenosylmethionine decarboxylase proenzyme-like	-1.37926	0.01	28.892	54.607	27.727	152.762	93.62	46.54
	LOC108214677	zinc finger CCCH domain-containing protein 29-like	-1.42865	0.05	39.54	40.854	26.427	92.807	145.31	45.797
	LOC108214588	scarecrow-like protein 21	-1.62677	0.01	22.635	31.812	26.695	92.976	97.419	51.602
	LOC108196536	transcription factor MYC4	-1.70773	0.001	26.851	41.024	23.633	106.278	120.107	60.315
	LOC108211108	VTE6-related protein At5g19930	-1.71913	0.01	18.412	22.454	33.708	112.934	122.261	37.375
	LOC108200940	CASP-like protein 1	-1.73185	0.05	21.803	4.294	32.352	109.95	101.656	40.553
	XLOC_006294		-1.93523	0.001	35.1	23.834	15.584	98.035	140.859	54.165
	LOC108210740	probable CCR4-associated factor 1 homolog 9	-1.94641	0.05	17.257	36.432	14.466	159.224	117.833	25.628
	LOC108193011	bifunctional pinoresinol-lariciresinol reductase 2-like	-1.99968	0.001	32.072	19.445	12.725	77.365	122.779	58.148
	LOC108200505	branched-chain-amino-acid aminotransferase 2, chloroplastic-like	-2.08278	0.01	17.788	11.694	25.861	116.945	142.154	29.688
	LOC108205085	protein C2-DOMAIN ABA-RELATED 11	-2.11827	0.01	17.005	17.521	21.306	87.451	142.252	37.689
	LOC108225078	zinc finger protein ZAT10	-2.12335	0.001	14.551	25.756	5.606	117.03	94.792	23.386
	LOC108215272	truncated transcription factor CAULIFLOWER D-like	-2.21719	0.001	14.271	25.37	19.509	106.336	102.265	63.459
	LOC108202939	uncharacterized LOC108202939	-2.23586	0.001	22.3	22.887	13.402	110.284	131.126	48.762
	LOC108207046	uncharacterized LOC108207046	-2.29208	0.05	4.146	4.638	19.989	184.502	71.725	11.614
	LOC108220215	allene oxide cyclase 4, chloroplastic-like	-2.48677	0.001	4.784	30.105	5.145	117.808	139.23	32.742
	LOC108206745	mitochondrial carnitine/acylcarnitine carrier-like protein	-2.49862	0.001	10.854	17.717	22.638	123.984	87.663	93.576
	LOC108215161	repetitive proline-rich cell wall protein 1-like	-2.66007	0.001	21.507	5.919	12.626	184.416	100.865	34.583
	LOC108211170	shikimate O-hydroxycinnamoyltransferase-like	-2.70368	0.001	16.527	14.001	11.586	112.195	84.709	75.118
	LOC108208919	phosphomethylpyrimidine synthase, chloroplastic	-2.88716	0.001	11.312	13.312	7.624	119.802	66.77	93.394
	LOC108198633	delta(12)-fatty-acid desaturase FAD2-like	-3.17588	0.001	10.405	13.892	5.833	102.698	108.809	64.808
	LOC108209891	uncharacterized LOC108209891	-3.46299	0.001	6.915	4.197	10.95	150.444	111.057	57.855
	LOC108210458	omega-3 fatty acid desaturase, chloroplastic	-4.0651	0.001	4.928	5.254	1.775	89.592	157.402	31.483
5	LOC108223241	dnaJ protein homolog	-1.21789	0.05	1049.36	1354.57	891.895	3426.28	1813.82	1875.3
	LOC108198846	major allergen Dau c 1-like	-1.84145	0.05	1117.53	763.705	700.229	2579.08	5944.8	1996.4
	LOC108224871	uncharacterized LOC108224871	-1.86265	0.01	680.698	402.667	240.447	2016.1	1143.79	1548.03
	LOC108220799	non-specific lipid-transfer protein 2-like	-2.15252	0.001	561.554	374.563	219.277	1808.33	2498.42	910.851
	LOC108198278	uncharacterized LOC108198278	-2.4817	0.05	354.032	355.966	253.946	3857.2	1183.63	1012.01
	LOC108226177	uncharacterized LOC108226177	-3.56343	0.001	318.628	21.909	144.616	4956.64	3587.86	1972.33
	LOC108205231	sesquiterpene synthase 2	-5.98435	0.001	5.465	4.599	21.813	1785.19	2640.57	821.895
6	LOC108192266	stomatal closure-related actin-binding protein 1	-1.07132	0.05	25.058	21.862	23.175	65.162	53.653	26.531
	LOC108202911	F-box/kelch-repeat protein SKIP11-like	-1.07352	0.05	15.591	20.687	10.664	43.466	30.399	19.395
	LOC108196522	zinc finger protein CONSTANS-LIKE 15	-1.09012	0.05	22.109	32.311	16.361	52.628	41.227	40.99
	LOC108214771	protein FLX-like 2	-1.09091	0.05	20.65	22.967	12.124	33.794	38.919	33.177
	LOC108199942	cysteine-rich repeat secretory protein 60-like	-1.11181	0.05	20.252	18.327	15.401	60.308	31.831	23.364
	LOC108216162	AT-hook motif nuclear-localized protein 10-like	-1.11333	0.05	19.339	24.511	16.076	40.25	41.965	34.349
	LOC108204958	ammonium transporter 1 member 1-like	-1.12413	0.05	17.438	17.077	18.699	38.453	35.398	33.474
	LOC108199768	uncharacterized LOC108199768	-1.13004	0.05	17.247	20.354	12.929	46.432	24.846	30.742
	LOC108197354	probable voltage-gated potassium channel subunit beta	-1.135	0.05	25.474	20.961	28.422	69.149	39.815	47.548
	LOC108228100	uncharacterized LOC108228100	-1.14179	0.05	7.674	15.254	12.414	46.112	22.228	12.644
	LOC108193403	CASP-like protein 4A3	-1.15362	0.05	19.439	17.671	16.445	48.896	28.644	33.434
	LOC108193922	uncharacterized LOC108193922	-1.16205	0.05	32.618	28.545	13.023	73.318	34.491	41.575
	LOC108224123	L-ascorbate oxidase-like	-1.16624	0.05	12.751	20.121	8.35	41.52	37.695	12.555
	LOC108196778	subtilisin-like protease SBT1.7	-1.1732	0.05	15.862	15.527	9.483	43.478	19.787	23.893
	LOC108201011	(S)-coclaurine N-methyltransferase	-1.1756	0.05	18.831	11.007	14.599	39.79	41.201	18.622
	LOC108220194	HD domain-containing protein 2-like	-1.19112	0.05	16.558	17.122	8.687	28.601	41.644	20.216
	LOC108227711	copper methylamine oxidase-like	-1.19457	0.05	18.795	22.33	14.713	38.18	41.689	34.917
	LOC108204744	probable polyamine oxidase 4	-1.19987	0.05	17.179	22.578	11.928	59.397	43.503	16.482
	LOC108206168	protein HGH1 homolog	-1.25295	0.05	23.832	29.292	17.066	64.328	55.096	36.017
	LOC108197057	coilin	-1.25534	0.05	10.038	21.611	4.153	39.195	28.852	15.953
	LOC108204295	LETM1 and EF-hand domain-containing protein 1, mitochondrial-like	-1.2603	0.05	15.773	13.258	10.055	48.573	25.429	18.696
	LOC108196091	UDP-glycosyltransferase 74G1-like	-1.27791	0.05	10.804	21.342	20.118	62.212	33.17	30.202
	LOC108228014	rop guanine nucleotide exchange factor 1	-1.28106	0.05	12.909	28.645	14.995	60.892	37.4	31.909
	LOC108200920	DNA-damage-repair/toleration protein DRT100-like	-1.2892	0.05	16.065	23.149	21.433	39.947	43.512	51.845
	LOC108224558	aluminum-activated malate transporter 9-like	-1.30131	0.05	13.315	13.937	8.121	44.899	32.185	12.047
	LOC108216275	calmodulin-binding protein 25-like	-1.30324	0.05	18.232	20.084	14.794	27.48	54.98	37.593
	LOC108219285	probable protein phosphatase 2C 66	-1.30824	0.05	22.142	21.13	4.884	43.775	32.033	35.993
	LOC108225281	probable carboxylesterase 2	-1.30866	0.05	13.482	6.824	15.629	41.209	24.379	24.939
	LOC108210633	uncharacterized LOC108210633	-1.30937	0.05	11.014	15.174	5.235	44.981	30.904	10.382
	LOC108219835	transcription initiation factor TFIID subunit 14b	-1.30939	0.05	15.957	15.957	6.123	49.078	22.3	20.399
	LOC108210046	transcription factor MYC2-like	-1.33513	0.05	17.598	26.174	6.264	56.546	46.766	21.072
	LOC108219239	VQ motif-containing protein 22-like	-1.34553	0.05	21.701	14.767	3.85	47.357	38.312	18.466
	LOC108210574	xylulose kinase-like	-1.35024	0.05	8.247	8.892	15.588	39.487	24.488	21.488
	LOC108211620	dof zinc finger protein DOF3.4-like	-1.35257	0.01	26.982	19.072	15.078	56.019	50.655	39.506
	LOC108210173	geranylgeranyl pyrophosphate synthase, chloroplastic-like	-1.36052	0.05	18.839	11.749	9.455	35.317	48.501	18.663
	LOC108197573	geranylgeranyl pyrophosphate synthase, chloroplastic-like	-1.36052	0.05	18.839	11.749	9.455	35.317	48.501	18.663
	LOC108214317	probable RNA-dependent RNA polymerase 3	-1.38773	0.01	11.628	11.771	11.81	41.793	31.243	17.69
	LOC108225520	BURP domain protein USPL1-like	-1.39469	0.05	9.81	19.591	5.066	15.789	38.663	29.023
	LOC108196017	developmentally-regulated G-protein 1-like	-1.39871	0.05	10.452	9.336	11.785	40.184	15.801	26.201
	LOC108195901	uncharacterized LOC108195901	-1.40361	0.01	21.064	26.981	11.011	63.073	42.984	38.86
	LOC108210444	general transcription factor IIF subunit 2	-1.40373	0.05	15.329	26.433	6.525	68.184	29.682	28.772
	LOC108205596	aldehyde dehydrogenase family 2 member C4-like	-1.41399	0.05	17.889	19.05	8.55	25.759	45.928	38.678
	LOC108196665	54S ribosomal protein L17, mitochondrial-like	-1.42767	0.05	10.323	18.443	3.757	30.829	25.505	25.629
	LOC108196026	S-adenosylmethionine decarboxylase proenzyme	-1.44854	0.01	10.755	11.496	9.917	36.046	32.624	16.47
	LOC108199566	uncharacterized LOC108199566	-1.45138	0.01	11.217	18.913	6.578	30.607	40.578	23.128
	LOC108197733	aldo-keto reductase family 4 member C9-like	-1.45811	0.05	7.365	7.886	14.106	33.718	20.045	27.828
	LOC108215425	polycomb group protein EMBRYONIC FLOWER 2-like	-1.46254	0.01	8.415	15.308	4.896	36.813	22.681	17.285
	LOC108225746	ABSCISIC ACID-INSENSITIVE 5-like protein 7	-1.46958	0.01	10.036	22.438	5.999	54.929	30.533	21.19
	LOC108218491	protein LYK5	-1.47972	0.05	11.791	10.126	14.33	14.504	55.373	32.182
	LOC108193897	transcription factor TCP8	-1.48027	0.01	12.073	19.672	11.236	30.154	35.65	41.541
	LOC108203150	glutamyl-tRNA reductase 2-like	-1.48746	0.05	9.272	13.614	4.564	36.851	35.348	8.952
	LOC108215249	scarecrow-like protein 8	-1.49338	0.01	15.008	14.681	7.656	33.432	44.008	22.568
	LOC108194110	uncharacterized protein At2g39790, mitochondrial-like	-1.5771	0.05	6.323	18.216	4.267	23.51	27.334	30.468
	LOC108219118	uncharacterized LOC108219118	-1.58011	0.05	12.208	8.649	8.687	27.978	28.118	27.626
	LOC108224679	serine/threonine-protein kinase SAPK1-like	-1.59188	0.05	9.655	10.875	9.77	57.883	37.595	9.406
	LOC108192456	E3 ubiquitin ligase BIG BROTHER-like	-1.59249	0.001	21.108	24.286	18.723	51.931	52.211	37.543
	LOC108193046	polyubiquitin	-1.59573	0.01	10.17	19.759	9.097	51.315	44.454	20.475
	LOC108193281	cytochrome P450 CYP71D313-like	-1.59931	0.01	10.463	13.598	18.196	47.136	33.806	44.705
	LOC108192921	pectinesterase 1	-1.60079	0.01	9.318	7.416	5.948	37.686	30.856	7.568
	LOC108192934	uncharacterized LOC108192934	-1.60216	0.05	15.748	26.262	2.593	59.724	39.762	38.082
	LOC108211683	uncharacterized hydrolase YugF-like	-1.6098	0.01	8.911	19.893	4.768	49.846	31.229	21.099
	LOC108225020	dof zinc finger protein DOF5.4	-1.61441	0.05	8.29	5.616	12.902	28.106	48.036	15.649
	LOC108215246	transcription factor BIM1	-1.61707	0.01	8.719	7.062	8.111	36.758	30.413	10.898
	LOC108198684	probable 6-phosphogluconolactonase 2	-1.62292	0.01	14.99	17.892	7.055	57.95	25.281	35.196
	LOC108225378	uncharacterized protein OsI_027940-like	-1.62341	0.01	10.029	10.117	15.423	58.68	27.735	28.251
	LOC108195150	alpha-1,4 glucan phosphorylase L isozyme, chloroplastic/amyloplastic	-1.64845	0.01	8.063	9.215	6.532	47.827	24.51	9.476
	LOC108218321	cytochrome P450 CYP72A219-like	-1.65527	0.001	10.864	14.319	12.014	53.325	32.735	27.826
	LOC108213186	BAG family molecular chaperone regulator 2-like	-1.65534	0.01	9.275	23.609	13.949	46.172	61.61	36.665
	LOC108219463	probable polyol transporter 4	-1.66338	0.001	12.875	18.506	7.343	50.532	37.562	28.564
	LOC108221721	probable protein phosphatase 2C 63	-1.67729	0.01	12.662	15.871	11.02	65.887	50.394	17.106
	LOC108206034	aspartyl protease family protein At5g10770-like	-1.68701	0.01	11.065	7.928	7.964	23.583	40.549	21.36
	LOC108205043	isovaleryl-CoA dehydrogenase, mitochondrial-like	-1.68883	0.001	10.713	11.279	6.033	36.877	29.743	17.635
	XLOC_007111		-1.70038	0.01	25.578	12.118	12.751	55.511	55.505	47.763
	LOC108228193	glutamate-1-semialdehyde 2,1-aminomutase, chloroplastic	-1.70372	0.001	11.468	8.535	9.666	48.212	30.378	20.737
	LOC108192845	protoporphyrinogen oxidase, mitochondrial	-1.70791	0.001	6.273	11.112	7.955	38.411	29.605	16.343
	LOC108221314	protein LIGHT-DEPENDENT SHORT HYPOCOTYLS 10-like	-1.71988	0.01	15.794	22.117	8.451	33.034	45.756	45.979
	LOC108228189	vacuolar-sorting receptor 3-like	-1.7224	0.001	8.306	15.284	5.225	43.906	35.102	16.303
	LOC108214195	homeobox-leucine zipper protein ATHB-12-like	-1.72783	0.05	5.671	14.729	6.757	14.516	40.738	32.265
	LOC108209287	hydroquinone glucosyltransferase	-1.72993	0.01	19.709	10.044	13.154	43.008	42.005	52.248
	LOC108216285	mediator of RNA polymerase II transcription subunit 15-like	-1.74665	0.05	5.026	3.354	11.345	46.757	17.156	18.606
	LOC108199864	polygalacturonase-1 non-catalytic subunit beta-like	-1.7537	0.01	9.361	9.369	7.44	41.995	43.765	10.285
	LOC108193241	ethylene-responsive transcription factor ERF118	-1.76817	0.05	10.655	15.449	9.726	34.128	30.062	48.098
	LOC108199707	putative nuclease HARBI1	-1.79663	0.05	7.723	10.377	2.68	35.249	38.103	7.84
	LOC108211482	omega-hydroxypalmitate O-feruloyl transferase	-1.81187	0.001	12.159	7.515	14.477	56.415	29.477	40.371
	LOC108204466	RING-H2 finger protein ATL54-like	-1.82418	0.001	12.275	10.727	5.858	34.62	45.202	20.649
	LOC108206290	uncharacterized LOC108206290	-1.85025	0.01	11.976	9.32	10.523	33.204	66.053	21.094
	LOC108206505	uncharacterized LOC108206505	-1.89487	0.001	7.978	12.938	11.896	65.785	36.155	26.082
	LOC108197407	haloacid dehalogenase-like hydrolase domain-containing protein 3	-1.90074	0.05	8.992	8.644	5.536	4.617	58.91	34.731
	LOC108211095	uncharacterized LOC108211095	-1.90702	0.01	7.037	12.148	2.203	33.101	25.06	22.591
	LOC108220312	cytochrome P450 93A3-like	-1.93143	0.05	17.021	7.42	1.221	32.311	27.209	48.313
	LOC108224990	cytochrome P450 78A5-like	-1.96534	0.05	7.678	20.086	6.406	28.893	39.611	57.18
	LOC108196147	short-chain dehydrogenase TIC 32, chloroplastic-like	-1.98322	0.01	6.548	7.444	3.055	44.489	27.866	7.39
	LOC108208027	protein FEZ	-1.99413	0.01	12.229	5.616	3.225	9.535	48.845	33.409
	LOC108225158	heat stress transcription factor B-3-like	-1.99601	0.001	5.72	8.868	7.158	51.857	18.85	22.218
	LOC108199536	sugar transport protein 13-like	-2.00496	0.05	4.532	13.107	7.344	75.512	33.201	12.124
	LOC108204853	uncharacterized LOC108204853	-2.00825	0.01	9.558	7.065	9.673	48.408	22.835	22.376
	LOC108196750	thioredoxin H-type	-2.02035	0.05	10.117	8.251	7.588	12.452	39.259	56.349
	LOC108214533	cytochrome P450 CYP72A219-like	-2.0307	0.05	6.397	7.938	8.495	72.803	23.419	10.807
	LOC108227664	uncharacterized LOC108227664	-2.04586	0.05	2.873	8.157	12.778	77.138	17.762	23.779
	LOC108224398	aspartyl protease AED3-like	-2.048	0.001	13.767	3.063	8.96	65.464	46.178	19.979
	LOC108220322	NAC domain-containing protein 2-like	-2.08652	0.001	13.92	7.723	8.146	41.478	36.956	45.797
	LOC108197188	UPF0695 membrane protein C977.11/PB8B6.06c	-2.11973	0.05	3.46	7.686	7.181	54.325	31.986	4.594
	LOC108210645	wall-associated receptor kinase-like 20	-2.12143	0.001	5.785	7.32	4.182	40.081	24.934	13.358
	LOC108197765	UPF0548 protein At2g17695	-2.12433	0.001	4.922	8.529	7.656	50.621	34.102	16.806
	LOC108219825	putative E3 ubiquitin-protein ligase XBAT31	-2.15989	0.001	8.178	8.524	5.993	22.677	50.066	27.645
	LOC108202811	expansin-A1-like	-2.18544	0.001	6.813	5.831	9.6	19.197	52.569	37.215
	LOC108214094	SNF2 domain-containing protein CLASSY 1-like	-2.27812	0.001	12.073	16.092	6.591	59.779	49.814	52.956
	LOC108193772	protein EDS1-like	-2.28236	0.01	3.115	2.079	7.479	62.514	36.356	4.197
	LOC108216223	crocetin glucosyltransferase, chloroplastic-like	-2.31005	0.001	3.092	11.086	6.053	46.764	39.343	22.521
	LOC108211440	AP2-like ethylene-responsive transcription factor At1g16060	-2.31771	0.001	6.329	9.354	6.281	62.649	38.715	17.841
	LOC108194245	transcription factor TCP20-like	-2.31912	0.001	12.217	9.21	4.719	41.91	42.238	43.788
	LOC108207659	uncharacterized LOC108207659	-2.39112	0.001	5.232	3.112	6.77	21.786	45.33	22.61
	LOC108205402	pyruvate kinase, cytosolic isozyme	-2.42761	0.001	6.189	4.412	9.972	56.093	43.479	26.551
	LOC108199538	histidine kinase 4-like	-2.47716	0.001	2.703	2.093	6.324	45.395	33.28	8.341
	LOC108211268	protein NRT1/ PTR FAMILY 5.6-like	-2.58308	0.001	4.633	6.54	5.191	39.469	46.712	17.948
	LOC108206917	protein CDI-like	-2.5862	0.05	3.638	8.604	4.967	46.24	76.308	10.832
	LOC108210165	putative clathrin assembly protein At4g40080	-2.6574	0.001	5.844	3.725	3.734	41.639	24.09	23.466
	LOC108200104	cyclin-D1-1-like	-2.79672	0.001	6.777	11.412	2.593	46.266	46.275	58.177
	LOC108198751	ethylene-responsive transcription factor ERF096-like	-2.79869	0.001	5.514	2.361	7.585	43.453	68.527	25.526
	LOC108197388	probable pyridoxal 5'-phosphate synthase subunit PDX1	-2.83019	0.001	7.09	4.317	4.028	39.482	64.266	21.035
	LOC108195271	probable calcium-binding protein CML16	-3.11723	0.001	2.983	3.166	3.434	26.321	34.652	28.329
	LOC108215404	triacylglycerol lipase 2-like	-3.2193	0.001	6.44	4.962	5.204	59.161	64.2	40.29
	LOC108207089	cytochrome P450 CYP736A12-like	-3.23568	0.001	5.237	4.968	4.92	70.478	29.398	31.825
	LOC108197317	auxin-responsive protein IAA27-like	-3.26914	0.001	3.016	5.066	1.336	40.409	32.389	27.496
	LOC108192811	zinc finger protein KNUCKLES-like	-3.64634	0.001	3.594	2.931	2.479	26.41	54.171	50.425
	LOC108200347	F-box protein CPR30-like	-4.00021	0.001	2.049	2.117	2.293	49.615	43.076	24.501
	LOC108201782	protein ECERIFERUM 1-like	-4.01728	0.001	0.982	1.936	3.407	50.86	42.793	42.032
7	LOC108203547	chlorophyll a-b binding protein CP26, chloroplastic-like	4.24688	0.001	54.547	29.886	244.612	3.756	2.003	1.587
	LOC108221937	ferredoxin--NADP reductase, leaf-type isozyme, chloroplastic-like	3.78993	0.01	44.003	30.535	206.97	4.369	1.795	3.006
	LOC108217667	protein trichome birefringence-like 43	3.61331	0.001	61.56	49.588	60.227	5.936	1.761	2.237
	LOC108202416	photosystem II core complex proteins psbY, chloroplastic	3.54211	0.01	64.295	24.152	189.25	3.926	3.758	3.764
	LOC108227375	glutamyl-tRNA reductase 1, chloroplastic	2.88879	0.001	43.798	41.864	59.105	4.09	6.134	3.816
	LOC108210038	metal-nicotianamine transporter YSL3	2.79142	0.001	103.509	67.068	88.335	13.486	6.465	8.161
	LOC108221944	gibberellin-regulated protein 11-like	2.76885	0.001	45.517	47.441	54.688	8.227	4.383	3.334
	LOC108197982	terpene synthase 10-like	2.75696	0.001	26.18	39.953	58.139	5.946	6.174	1.012
	LOC108210151	uncharacterized LOC108210151	2.70613	0.05	71.698	72.702	157.532	12.176	3.11	11.26
	LOC108197570	non-functional NADPH-dependent codeinone reductase 2-like	2.552	0.05	67.967	4.381	47.803	4.069	0.935	4.132
	LOC108192286	uncharacterized LOC108192286	2.39529	0.001	52.281	57.019	48.874	12.492	7.473	4.887
	LOC108227495	DNA repair protein RAD16-like	2.3749	0.001	36.68	71.946	81.053	12.447	8.829	6.227
	LOC108197088	transmembrane protein 136	2.27702	0.001	41.547	44.22	50.739	6.74	8.355	6.159
	LOC108223305	protein ENHANCED DOWNY MILDEW 2-like	2.12327	0.001	51.208	53.887	54.703	9.439	17.006	7.324
	LOC108204519	lysophospholipid acyltransferase 1-like	2.00447	0.001	41.148	46.057	38.018	14.654	7.073	4.335
	LOC108199730	UDP-glycosyltransferase 89B2-like	1.86294	0.001	65.249	50.876	63.916	16.442	17.539	7.545
	LOC108194223	uncharacterized protein At5g65660-like	1.84739	0.001	48.007	52.785	62.789	12.666	11.873	10.215
	LOC108216537	uncharacterized protein At4g22758-like	1.81649	0.05	28.311	80.667	46.929	18.182	8.886	7.543
	LOC108196454	uncharacterized LOC108196454	1.80877	0.01	55.725	67.758	86.693	7.168	11.866	19.329
	LOC108195206	transcription factor HBP-1b(c38)-like	1.70031	0.05	55.776	36.262	61.095	17.029	9.595	10.991
	LOC108221114	uncharacterized LOC108221114	1.63211	0.001	55.38	65.601	62.847	19.188	20.001	10.159
	LOC108200753	probable metal-nicotianamine transporter YSL7	1.62842	0.01	75.386	64.056	83.63	20.578	17.734	18.773
	LOC108200473	uncharacterized LOC108200473	1.56109	0.05	58.324	46.887	66.682	12.466	24.999	8.581
	XLOC_029317		1.48177	0.01	44.318	64.63	52.176	7.785	15.158	17.483
	LOC108197746	transmembrane emp24 domain-containing protein p24delta7-like	1.45338	0.05	56.62	43.148	53.463	27.937	14.378	6.346
	LOC108192949	autophagy-related protein 3	1.3044	0.05	32.729	43.54	39.419	8.039	20.522	8.048
	LOC108200628	stem-specific protein TSJT1	1.25022	0.05	46.379	36.336	49.405	12.556	13.329	16.396
	LOC108197083	uncharacterized membrane protein C776.05-like	1.23079	0.05	47.774	50.41	55.811	18.61	20.481	14.999
	LOC108227971	F-box protein At5g39450-like	1.22609	0.05	40.252	50.647	48.632	24.18	15.875	11.543
	LOC108215453	protein OS-9 homolog	1.1756	0.05	28.53	45.238	40.761	16.196	16.613	9.799
8	LOC108220770	protein GLUTAMINE DUMPER 2-like	3.88957	0.001	108.447	58.286	55.029	4.493	3.172	2.051
	LOC108209278	cysteine synthase-like	3.361	0.001	59.628	42.831	41.683	4.625	1.988	3.019
	LOC108210835	glucan endo-1,3-beta-glucosidase 14	2.96972	0.001	53.217	66.096	45.225	2.349	4.016	5.885
	LOC108195659	uncharacterized LOC108195659	2.92145	0.001	53.221	61.976	34.19	5.039	3.065	5.16
	LOC108210675	alpha carbonic anhydrase 1, chloroplastic-like	2.91656	0.001	71.345	53.457	45.413	7.749	7.333	3.128
	LOC108212736	codeine O-demethylase-like	2.80239	0.01	33.826	83.74	29.221	2.304	7.142	3.101
	LOC108210157	uncharacterized LOC108210157	2.45197	0.001	37.43	56.01	33.589	4.976	6.379	5.195
	LOC108197392	aspartic proteinase nepenthesin-1	2.42245	0.001	59.082	36.176	30.821	7.419	5.712	4.82
	LOC108205782	heat shock 70 kDa protein 18-like	2.33279	0.001	60.934	49.084	36.181	10.655	7.337	5.247
	LOC108209785	protein kinase APK1A, chloroplastic-like	2.26904	0.001	66.345	101.268	42.602	7.455	16.797	6.773
	LOC108224604	nuclear transcription factor Y subunit A-10	2.26285	0.05	127.074	25.565	31.846	19.698	2.792	2.085
	LOC108216515	uncharacterized LOC108216515	2.04948	0.001	64.576	77.204	36.823	8.832	5.288	12.884
	LOC108214843	cytochrome P450 CYP72A219-like	2.04829	0.001	38.046	74.597	33.034	8.94	11.078	6.4
	LOC108210953	aspartic proteinase PCS1-like	2.02422	0.001	64.523	84.427	53.712	10.835	18.114	9.434
	LOC108192662	uncharacterized LOC108192662	1.94666	0.01	58.611	51.776	52.101	4.2	20.262	4.58
	LOC108196162	tryptophan aminotransferase-related protein 3-like	1.91628	0.05	39.274	84.511	29.761	4.808	7.927	11.667
	LOC108202566	tonoplast dicarboxylate transporter-like	1.90786	0.001	81.384	70.711	42.038	15.196	6.791	14.28
	LOC108211653	probable BOI-related E3 ubiquitin-protein ligase 3	1.90132	0.01	52.16	63.103	31.492	6.713	4.652	12.536
	LOC108215266	uncharacterized LOC108215266	1.87742	0.001	58.676	51.277	39.693	26.777	10.408	5.333
	LOC108200126	uncharacterized LOC108200126	1.8397	0.05	86.266	83.803	56.452	2.02	10.475	20.341
	LOC108214876	NHP2-like protein 1	1.82622	0.01	76.742	63.366	37.369	4.356	19.788	8.954
	LOC108197411	transcription factor bHLH113-like	1.81787	0.01	64.743	39.514	48.118	7.335	14.536	9.105
	LOC108204239	uncharacterized LOC108204239	1.7123	0.001	47.741	59.902	49.235	19.657	13.027	8.213
	LOC108215929	UDP-glycosyltransferase 91A1-like	1.69945	0.001	56.736	66.476	58.27	25.468	13.203	8.907
	LOC108202500	glucan endo-1,3-beta-D-glucosidase	1.68781	0.01	83.404	57.769	75.54	6.605	18.509	19.937
	LOC108196408	sphingosine-1-phosphate lyase	1.65548	0.01	52.808	71.733	29.537	22.13	12.059	5.855
	LOC108210938	BTB/POZ domain-containing protein At5g48800	1.62967	0.001	36.273	52.093	35.995	11.622	8.97	10.568
	LOC108227780	phospholipid:diacylglycerol acyltransferase 1-like	1.62925	0.01	82.264	78.411	78.662	24.974	29.305	11.258
	LOC108197253	cytochrome P450 CYP749A22-like	1.61298	0.01	65.243	97.097	40.196	35.741	12.757	5.709
	LOC108200706	7-deoxyloganetin glucosyltransferase-like	1.57052	0.05	53.277	66.215	35.75	11.015	25.967	2.952
	LOC108197383	probable xyloglucan endotransglucosylase/hydrolase protein 33	1.55139	0.05	76.765	62.006	32.736	18.773	25.111	2.792
	LOC108202996	myb-related protein 3R-1-like	1.52884	0.01	54.801	100.132	51.706	25.85	12.963	17.886
	LOC108199613	palmitoyl-protein thioesterase 1-like	1.52057	0.01	48.968	53.252	39.753	10.384	17.052	10.807
	LOC108210103	siroheme synthase 2-like	1.51709	0.05	53.613	67.302	16.638	19.788	5.918	9.14
	LOC108216098	prosaposin-like	1.50077	0.01	76.016	87.721	49.647	22.525	26.46	12.585
	LOC108217769	uncharacterized LOC108217769	1.4887	0.05	52.383	46.692	26.427	13.622	7.938	11.771
	LOC108197459	suppressor of disruption of TFIIS	1.4886	0.05	39.89	57.897	25.079	5.992	10.433	12.844
	LOC108215077	BEL1-like homeodomain protein 9	1.48737	0.01	61.918	92.405	39.161	15.55	22.962	14.117
	LOC108215710	BTB/POZ domain-containing protein At1g55760-like	1.45492	0.01	44.733	66.092	32.264	13.925	12.776	13.006
	LOC108210769	probable WRKY transcription factor 69	1.43467	0.01	61.681	109.651	64.231	36.012	20.833	15.353
	LOC108215773	deSI-like protein At4g17486	1.41812	0.01	46.079	47.095	23.179	11.506	12.222	9.801
	LOC108214966	putative glycosyltransferase 7	1.38683	0.01	73.666	59.746	47.34	25.797	18.118	14.173
	LOC108223971	cytosolic enolase 3	1.36929	0.01	64.002	74.931	47.048	17.954	23.269	15.911
	LOC108209980	glyoxylate/hydroxypyruvate reductase HPR3-like	1.36787	0.05	42.194	45.628	35.677	5.705	16.446	14.771
	LOC108206326	vesicle-associated protein 2-1-like	1.34146	0.05	34.58	42.612	37.706	6.149	33.067	9.597
	LOC108221895	aminoacylase-1	1.33427	0.01	65.575	70.068	55.167	32.967	20.314	12.279
	LOC108208748	CBL-interacting serine/threonine-protein kinase 23-like	1.33365	0.05	62.283	79.887	61.21	32.56	28.722	8.818
	LOC108208068	BOI-related E3 ubiquitin-protein ligase 1-like	1.32342	0.05	52.146	101.954	39.905	37.064	13.176	12.298
	LOC108202663	probable galacturonosyltransferase 4	1.32322	0.01	48.876	56.381	36.573	15.305	18.174	12.152
	LOC108224811	uncharacterized LOC108224811	1.31191	0.05	49.372	46.803	39.26	10.354	15.705	14.514
	LOC108214265	bidirectional sugar transporter SWEET5-like	1.30506	0.01	71.16	72.189	55.588	25.733	23.511	17.674
	LOC108226269	E3 ubiquitin-protein ligase MIEL1	1.29461	0.05	58.238	82.894	60.108	38.808	18.629	13.429
	LOC108225471	uncharacterized LOC108225471	1.28114	0.05	65.222	71.497	28.955	20.107	20.376	13.761
	LOC108196158	uncharacterized protein At4g14100-like	1.28103	0.05	57.013	49.927	34.374	19.359	14.683	13.03
	LOC108209959	uncharacterized LOC108209959	1.28084	0.05	65.534	87.898	33.428	26.493	20.06	15.273
	LOC108225775	kynurenine formamidase-like	1.27351	0.05	85.05	80.601	67.144	13.853	37.401	21.625
	LOC108219607	D-xylose-proton symporter-like 2	1.25744	0.05	72.771	52.544	65.526	31.028	19.915	16.949
	LOC108219895	binding partner of ACD11 1-like	1.25544	0.05	86.644	70.468	82.458	17.102	29.753	28.787
	LOC108212641	DNA-binding protein DDB_G0278111-like	1.24566	0.05	54.327	52.718	44.272	11.232	25.954	12.341
	LOC108227543	ylmG homolog protein 1-2, chloroplastic-like	1.2269	0.05	58.049	56.854	46.569	16.796	19.739	17.42
	LOC108214449	UPF0301 protein SCO2948	1.21577	0.05	50.462	42.348	33.416	6.753	15.611	16.054
	LOC108202874	uncharacterized LOC108202874	1.21383	0.05	68.373	75.213	38.359	16.438	11.78	25.979
	LOC108218469	NAC domain-containing protein 41-like	1.18229	0.05	40.046	45.203	35.205	13.211	22.524	8.241
	LOC108208088	uncharacterized LOC108208088	1.16454	0.05	45.446	35.581	43.974	12.191	23.497	10.025
	LOC108214864	cellulose synthase-like protein E1	1.1496	0.05	45.218	72.476	47.944	31.031	16.097	15.549
	LOC108215146	protein trichome birefringence-like 19	1.14939	0.05	44.118	76.505	49.515	26.743	42.327	11.112
	LOC108223992	protein WVD2-like 4	1.14256	0.05	69.172	91.761	48.167	31.389	27.936	18.807
	LOC108196327	E3 ubiquitin-protein ligase SINAT2-like	1.12804	0.05	45.644	62.388	41.45	31.27	12.272	10.732
	LOC108196619	dihydrolipoyllysine-residue succinyltransferase component of 2-oxoglutarate dehydrogenase complex 1, mitochondrial-like	1.11735	0.05	40.698	47.25	29.859	18.866	20.516	8.871
	LOC108204229	alpha-mannosidase	1.10355	0.05	37.848	49.333	39.333	27.064	17.18	7.878
	LOC108196437	uncharacterized LOC108196437	1.09473	0.05	61.622	59.956	49.26	31.363	17.239	16.796
	LOC108196047	alpha-amylase	1.0855	0.05	45.19	52.507	44.454	33.577	14.234	13.842
	LOC108202095	proteasome subunit alpha type-6-like	1.07817	0.05	78.065	67.154	82.281	47.069	29.922	17.866
	LOC108198352	mitochondrial adenine nucleotide transporter ADNT1-like	1.05954	0.05	47.395	45.935	50.526	18.523	22.53	16.223
	LOC108202697	transmembrane 9 superfamily member 1-like	1.04794	0.05	43.809	45.513	47.793	30.467	17.217	11.014
	LOC108196590	probable inactive receptor-like protein kinase At3g56050	1.04394	0.05	41.188	46.191	41.01	29.348	14.157	11.388
	LOC108215032	26S proteasome non-ATPase regulatory subunit 13 homolog A-like	1.04335	0.05	66.266	64.999	65.995	21.947	35.685	20.946
9	LOC108200480	photosystem I reaction center subunit II, chloroplastic-like	3.88008	0.01	522.983	222.463	1611.88	17.773	11.545	32.132
	LOC108224384	protein EXORDIUM-like 2	3.00149	0.001	685.683	615.326	711.416	66.166	52.375	63.369
	LOC108206639	probable aquaporin TIP2-2	2.97987	0.001	840.167	530.743	622.526	44.708	71.425	57.078
	LOC108210026	protein NRT1/ PTR FAMILY 6.3-like	2.9324	0.001	1291.77	2226.57	758.647	130.429	21.566	130.882
	LOC108205021	plasma membrane-associated cation-binding protein 1	2.24297	0.001	914.425	944.477	455.661	180.398	119.628	87.119
	XLOC_006713		2.09498	0.001	1661.16	1149.26	1320.52	199.682	292.067	216.866
	LOC108223513	chlorophyll a-b binding protein 37, chloroplastic	1.96294	0.05	418.869	30.572	1912.95	53.211	8.073	16.03
	LOC108193132	cell wall / vacuolar inhibitor of fructosidase 1-like	1.87655	0.01	1559.58	1513.81	703.926	122.164	229.589	301.904
	LOC108193765	uncharacterized protein PHLOEM PROTEIN 2-LIKE A4-like	1.66771	0.01	496.203	944.816	858.037	199.103	141.756	193.754
	LOC108204706	GDSL esterase/lipase At1g28580	1.60107	0.01	720.166	778.447	568.807	267.541	205.837	109.096
	LOC108197350	wound-induced protein 1	1.5148	0.01	790.498	588.564	795.837	279.229	214.978	149.416
	LOC108199861	thiol protease aleurain-like	1.32052	0.05	905.671	823.869	891.452	259.387	306.408	271.757
10	LOC108204812	thiamine thiazole synthase 2, chloroplastic-like	-1.76577	0.01	1812.48	1811.96	2531.64	7243.37	7903.56	5613.06
	LOC108218784	uncharacterized LOC108218784	-3.5736	0.001	713.262	899.609	788.096	6763.62	13787.9	10728.2
11	LOC108200292	uncharacterized LOC108200292	-1.23373	0.05	35.099	24.793	37.048	59.027	118.752	49.443
	LOC108206402	glucose-induced degradation protein 8 homolog	-1.31143	0.05	20.462	34.175	10.494	37.864	78.317	35.604
	LOC108193391	uncharacterized LOC108193391	-1.423	0.01	20.223	23.212	28.64	63.069	56.65	61.71
	LOC108200867	probable methyltransferase At1g27930	-1.4431	0.05	16.975	8.828	35.059	36.196	61.7	75.769
	LOC108211287	uncharacterized protein At5g48480-like	-1.51423	0.01	27.613	19.367	19.242	51.769	62.527	60.085
	LOC108193167	uncharacterized LOC108193167	-1.64017	0.01	22.986	24.662	14.661	41.327	87.762	64.861
	LOC108199094	putative E3 ubiquitin-protein ligase XBAT35	-1.67321	0.01	21.617	20.361	19.979	45.798	78.188	61.365
	LOC108223042	phosphoenolpyruvate carboxylase 2	-1.70799	0.01	22.996	24.885	27.46	57.553	119.347	65.045
	LOC108227723	uncharacterized LOC108227723	-1.75479	0.05	23.25	8.475	13.726	18.708	71.011	71.837
	LOC108206773	protein PLANT CADMIUM RESISTANCE 2-like	-1.94186	0.001	20.16	26.67	16.909	45.021	127.69	68.545
	LOC108197683	protein RALF-like 24	-1.94627	0.001	17.529	11.442	16.726	30.762	97.975	53.978
	LOC108210736	gibberellin-regulated protein 6-like	-2.11001	0.01	21.124	15.508	12.505	50.123	132.072	42.266
	LOC108195368	uncharacterized LOC108195368	-2.26981	0.001	22.998	17.561	13.886	54.922	113.577	92.15
	LOC108194188	squamosa promoter-binding protein 1-like	-2.60286	0.001	9.269	14.964	6.602	40.554	116.127	46.491
	LOC108211617	gamma-glutamyl peptidase 5-like	-4.3525	0.001	3.921	3.684	3.57	37.759	134.212	150.956
12	LOC108199816	alcohol dehydrogenase 1	-1.18338	0.05	139.364	156.399	138.139	252.948	310.745	317.429
	LOC108220330	probable stress-associated endoplasmic reticulum protein	-1.1877	0.05	169.445	208.638	121.757	256.673	436.366	315.749
	LOC108221993	histone H4	-1.23729	0.05	160.097	107.566	93.172	306.506	318.297	158.074
	LOC108219155	ACT domain-containing protein ACR9	-1.23837	0.05	137.526	144.672	92.68	298.258	329.921	190.552
	LOC108197173	protein SRG1-like	-1.24251	0.05	131.404	100.907	166.592	389.716	272.713	259.208
	LOC108227842	GATA transcription factor 2-like	-1.30694	0.05	152.194	113.94	90.998	210.989	349.609	251.103
	LOC108210593	triphosphate tunel metalloenzyme 3	-1.32077	0.05	100.597	109.812	65.313	244.371	183.479	191.362
	LOC108223075	betaine aldehyde dehydrogenase 1, chloroplastic	-1.33419	0.05	159.42	208.351	141.527	244.538	486.726	420.692
	LOC108200894	glycine-rich cell wall structural protein-like	-1.38653	0.05	121.447	146.705	180.312	539.532	526.769	166.567
	LOC108218742	delta(12)-fatty-acid desaturase FAD2-like	-1.52497	0.01	97.466	111.965	58.319	402.531	278.214	102.691
	LOC108224710	60S ribosomal protein L7-2-like	-1.53185	0.01	116.459	130.092	93.514	255.954	303.027	323.662
	LOC108228046	4-hydroxy-3-methylbut-2-enyl diphosphate reductase, chloroplastic-like	-1.67199	0.01	88.451	102.281	88.607	385.559	306.543	173.888
	LOC108201873	uncharacterized LOC108201873	-1.80618	0.01	22.764	60.436	19.554	262.992	203.918	265.617
	LOC108223417	3-hydroxy-3-methylglutaryl-coenzyme A reductase 1-like	-1.82266	0.001	132.498	97.567	62.338	291.943	325.488	341.058
	LOC108193493	delta(12)-fatty-acid desaturase FAD2-like	-1.86633	0.001	80.064	68.948	90.869	283.49	315.226	253.459
	LOC108200093	ankyrin repeat-containing protein At2g01680-like	-1.87514	0.05	11.236	71.32	3.549	45.729	322.015	670.366
	LOC108225766	probable carboxylesterase 13	-1.98612	0.001	59.861	37.234	82.299	283.409	317.043	168.629
	LOC108219820	amino acid permease 6-like	-2.11112	0.001	39.939	72.697	49.99	313.551	281.792	122.865
	LOC108196711	BTB/POZ and TAZ domain-containing protein 4	-2.12741	0.001	120.947	80.824	60.042	332.324	543.002	282.733
	LOC108206672	kirola-like	-2.14653	0.01	101.465	199.606	58.737	306.582	860.868	427.484
	LOC108224968	macro domain-containing protein VPA0103	-2.47399	0.001	63.846	54.808	46.343	282.079	249.439	352.082
	LOC108200815	metalloendoproteinase 1-like	-2.6637	0.01	1.98	12.775	8.431	159.514	781.563	31.522
	LOC108205617	metallothionein-like protein 1	-2.72693	0.01	92.825	53.135	66.19	87.213	1000.57	495.224
	LOC108193639	defensin-like protein 1	-2.7451	0.001	33.432	12.467	39.026	254.175	240.433	181.552
	LOC108219923	glucose-6-phosphate/phosphate translocator 2, chloroplastic-like	-3.06167	0.01	23.588	55.716	4.708	295.897	919.711	54.061
	LOC108193516	stress-associated endoplasmic reticulum protein 2-like	-3.21438	0.001	29.769	27.476	17.049	205.943	230.949	249.303
	LOC108205198	eukaryotic initiation factor 4A-15-like	-3.40007	0.001	14.069	23.146	4.12	256.749	393.036	568.757
	LOC108224641	cannabidiolic acid synthase-like 1	-5.12503	0.001	2.703	9.631	3.795	140.158	686.566	192.884
13	LOC108216350	uncharacterized LOC108216350	-1.19092	0.05	51.935	37.549	21.505	85.92	79.813	66.111
	LOC108196813	pyruvate kinase, cytosolic isozyme	-1.20174	0.05	43.177	64.882	39.762	76.197	118.483	106.797
	LOC108203078	spermidine synthase 1	-1.21121	0.05	33.758	43.441	48.709	81.594	86.739	98.667
	LOC108193861	10 kDa chaperonin	-1.25818	0.05	33.498	34.243	34.301	69.18	92.524	63.717
	LOC108219159	B-box zinc finger protein 22-like	-1.28967	0.05	33.122	22.585	48.108	106.318	65.987	80.536
	LOC108193590	uncharacterized LOC108193590	-1.36585	0.01	53.776	50.467	25.605	85.309	110.701	99.122
	LOC108193957	dof zinc finger protein DOF3.4-like	-1.3972	0.01	32.123	34.169	42.02	93.635	99.21	77.504
	LOC108226295	stem-specific protein TSJT1-like	-1.41814	0.01	32.588	21.935	36.148	108.301	68.193	64.531
	LOC108210537	aquaporin PIP2-7-like	-1.47288	0.01	41.777	38.93	47.111	103.489	104.581	121.499
	LOC108196013	leucine-rich repeat receptor-like serine/threonine-protein kinase BAM1	-1.65374	0.01	29.313	30.628	39.315	98.439	115.022	88.294
	LOC108206172	PLASMODESMATA CALLOSE-BINDING PROTEIN 4	-1.66853	0.05	11.095	10.413	46.103	61.925	61.907	96.724
	LOC108197141	fumarylacetoacetase	-1.7208	0.001	23.892	25.45	27.413	101.416	64.283	64.053
	LOC108193334	RNA-binding protein pno1-like	-1.77539	0.001	37.334	25.448	19.461	85.827	87.663	84.308
	LOC108225645	uncharacterized LOC108225645	-1.90519	0.01	31.494	22.013	6.109	87.615	84.27	59.171
	LOC108210217	lipid transfer-like protein VAS	-1.92764	0.001	23.302	14.875	25.103	65.435	83.21	90.371
	LOC108225373	uncharacterized LOC108225373	-2.00624	0.001	15.06	26.048	18.629	74.432	66.571	83.704
	LOC108211589	uncharacterized protein At5g48480-like	-2.59431	0.001	30.607	10.396	7.378	102.319	114.273	106.028
	LOC108206052	phosphoenolpyruvate carboxylase kinase 2-like	-2.72264	0.001	20.68	22.985	8.502	93.095	124.176	125.164
14	LOC108193652	mitochondrial import receptor subunit TOM9-2	-1.05989	0.05	92.498	85.122	72.827	175.341	149.893	144.389
	LOC108202452	acetate/butyrate--CoA ligase AAE7, peroxisomal-like	-1.20024	0.05	60.144	88.239	67.721	167.139	143.005	140.172
	LOC108206587	uncharacterized LOC108206587	-1.22171	0.05	122.782	87.326	62.905	113.207	235.438	205.949
	LOC108225194	protein BUD31 homolog 1-like	-1.22702	0.05	104.374	94.145	70.727	195.796	168.433	194.038
	LOC108194121	glutaredoxin	-1.26651	0.05	80.174	92.624	46.686	103.973	197.291	160.899
	LOC108197038	zinc finger CCCH domain-containing protein 20	-1.39515	0.01	92.008	98.975	64.428	199.234	221.108	184.447
	LOC108213258	uncharacterized LOC108213258	-1.45971	0.01	49.458	55.273	58.132	113.939	144.38	151.587
	LOC108226657	uncharacterized LOC108226657	-1.46972	0.01	39.767	46.398	56.084	92.865	136.023	139.257
	LOC108197446	putative F-box/LRR-repeat protein 9	-1.51839	0.05	52.175	50.971	59.831	104.666	149.849	178.79
	LOC108209137	V-type proton ATPase subunit E-like	-1.56952	0.05	53.961	42.874	44.575	96.787	127.311	162.674
	LOC108209560	protein trichome birefringence-like 2	-1.66171	0.01	39.611	54.96	40.391	126.551	123.231	139.274
	LOC108197118	probable methyltransferase At1g27930	-1.67779	0.01	35.773	40.222	88.114	169.237	158.609	216.876
	LOC108211728	protein BUD31 homolog 1	-2.2003	0.001	34.895	32.417	22.198	65.371	190.228	158.076
	LOC108200659	uncharacterized LOC108200659	-3.08918	0.001	24.29	27.704	21.211	138.713	195.164	315.257
	LOC108208172	glutaredoxin-C10-like	-4.48536	0.001	2.449	6.782	9.817	151.376	264.394	208.807
15	LOC108222781	L-idonate 5-dehydrogenase	-1.28606	0.05	251.768	195.388	310.704	744.411	490.082	552.552
	LOC108209678	ubiquitin-conjugating enzyme E2-17 kDa	-1.30927	0.05	430.813	299.664	425.794	752.512	876.705	1016.97
	LOC108217573	protein STRICTOSIDINE SYNTHASE-LIKE 11-like	-1.36286	0.05	155.798	150.894	220.599	657.639	547.634	223.932
	LOC108206338	bZIP transcription factor 53	-1.37893	0.05	275.748	199.354	180.301	304.164	724.37	555.623
	LOC108201753	cysteine proteinase inhibitor 6-like	-1.40264	0.05	255.138	310.706	278.396	362.909	682.921	609.787
	LOC108224042	21 kDa protein	-1.40468	0.05	387.101	220.146	289.027	1377.38	592.023	466.494
	LOC108223209	1-aminocyclopropane-1-carboxylate oxidase	-1.4865	0.05	309.107	108.142	191.814	681.425	512.337	502.593
	LOC108202733	serine decarboxylase-like	-1.59009	0.01	259.327	773.951	225.664	1509.16	988.423	1059.21
	LOC108198637	delta(12) fatty acid desaturase FAD2-like	-1.62443	0.01	168.57	260.275	124.393	899.664	564.714	274.439
	LOC108206684	ethylene-responsive transcription factor 4	-1.69142	0.01	195.912	231.687	102.32	549.122	732.122	347.128
	LOC108215707	S-formylglutathione hydrolase	-1.75105	0.01	170.311	228.888	212.663	569.805	758.76	589.462
	LOC108194039	acyl carrier protein 1, chloroplastic-like	-1.7592	0.01	384.32	321.594	217.913	745.261	1218.35	917.843
	LOC108193202	ethylene-responsive transcription factor RAP2-3-like	-1.83359	0.001	255.556	148.359	169.072	780.315	574.48	526.657
	LOC108227914	glyceraldehyde-3-phosphate dehydrogenase, cytosolic	-1.8913	0.001	199.126	530.321	233.406	1180.68	1238.92	970.696
	LOC108196149	short-chain dehydrogenase TIC 32, chloroplastic-like	-2.0965	0.05	21.046	218.85	10.345	678.772	552.741	202.34
	LOC108220341	stem-specific protein TSJT1	-2.22208	0.001	213.251	180.364	243.364	1203.88	738.015	1026.81
	LOC108196763	myb family transcription factor APL-like	-2.22684	0.001	117.063	141.1	113.439	594.524	513.356	531.311
	LOC108210511	PLASMODESMATA CALLOSE-BINDING PROTEIN 2-like	-2.32853	0.001	141.861	53.528	195.335	1141.91	706.413	552.397
	LOC108211077	protein TIFY 10A-like	-2.36783	0.05	80.867	215.779	43.823	898.302	1033.56	197.753
	LOC108218939	probable 1-deoxy-D-xylulose-5-phosphate synthase 2, chloroplastic	-2.45129	0.001	101.695	145.846	269.402	2034.19	852.349	651.845
	LOC108209058	36.4 kDa proline-rich protein-like	-3.68124	0.001	64.474	14.872	71.147	2383.58	440.159	825.299
16	LOC108214399	beta-galactosidase-like	4.07269	0.001	162.264	162.444	93.183	5.61	6.669	4.897
	LOC108220793	GDSL esterase/lipase At5g55050	3.48623	0.001	80.451	226.245	85.241	14.1	5.086	3.671
	LOC108196008	uncharacterized LOC108196008	3.13475	0.001	124.753	137.483	87.166	9.252	3.493	10.134
	LOC108202895	photosystem I reaction center subunit N, chloroplastic	3.07536	0.05	88.821	75.023	200.029	17.881	3.186	6.165
	LOC108197279	epidermis-specific secreted glycoprotein EP1-like	2.91654	0.001	114.178	190.741	54.023	11.541	16.255	4.383
	LOC108218641	alpha-L-arabinofuranosidase 1	2.79271	0.001	83.656	194.981	90.873	22.273	10.663	6.706
	LOC108224257	triacylglycerol lipase 2	2.65892	0.001	80.379	116.585	141.295	2.165	11.668	13.853
	LOC108193804	endo-1,3;1,4-beta-D-glucanase-like	2.57428	0.001	119.393	110.587	124.59	16.251	17.013	12.524
	LOC108218525	heavy metal-associated isoprenylated plant protein 3-like	2.52505	0.001	101.738	212.482	82.091	36.462	3.291	2.318
	XLOC_013665		2.50066	0.001	96.733	125.919	160.66	42.107	4.606	4.343
	LOC108224615	protein EXORDIUM-like 2	2.31625	0.001	165.016	122.754	132.837	10.518	7.696	28.432
	LOC108205265	CBL-interacting serine/threonine-protein kinase 1	2.28227	0.001	91.609	130.895	58.56	20.4	16.593	8.704
	LOC108206754	uncharacterized LOC108206754	2.18617	0.001	168.575	106.511	143.003	6.078	34.279	17.997
	LOC108228006	oxalate--CoA ligase-like	2.17699	0.001	104.571	121.789	51.532	22.234	18.599	7.506
	LOC108208448	protein LIGHT-DEPENDENT SHORT HYPOCOTYLS 2-like	2.15897	0.001	151.796	104.749	71.541	37.311	7.342	9.834
	LOC108223827	serine/threonine-protein kinase SRK2G-like	2.15287	0.001	120.876	104.508	97.077	29.754	16.123	13.513
	LOC108193758	F-box protein PP2-A13	2.10468	0.001	129.019	129.673	67.643	13.701	14.928	21.648
	LOC108219966	uncharacterized LOC108219966	1.70454	0.05	112.195	200.977	49.388	17.329	33.59	25.258
	LOC108206802	elicitor-responsive protein 3-like	1.70387	0.01	81.305	94.043	82.516	19.642	37.362	3.538
	LOC108202638	uncharacterized LOC108202638	1.65743	0.01	103.126	75.238	80.351	23.474	33.603	7.197
	LOC108210133	pectin acetylesterase 6-like	1.64182	0.001	123.319	154.18	94.348	36.645	35.606	24.626
	LOC108201729	protein NRT1/ PTR FAMILY 5.10-like	1.63328	0.001	86.465	109.175	72.308	37.275	19.525	15.717
	LOC108193833	chlorophyllase-2, chloroplastic	1.63281	0.01	81.01	87.933	112.471	20.276	23.055	25.379
	LOC108219177	transmembrane emp24 domain-containing protein p24delta3-like	1.63098	0.001	114.137	121.679	79.004	22.541	31.704	24.25
	LOC108215189	signal recognition particle receptor subunit beta-like	1.49459	0.01	104.868	129.903	168.113	37.378	50.369	28.292
	LOC108219965	bZIP transcription factor 53-like	1.49192	0.01	150.266	149.717	78.604	44.995	41.929	21.204
	LOC108206519	E3 ubiquitin-protein ligase RHA1B-like	1.48474	0.01	111.587	85.194	82.739	26.151	33.112	20.464
	LOC108224115	probable xyloglucan endotransglucosylase/hydrolase protein 23	1.34601	0.05	133.271	140.515	73.87	18.188	64.712	20.21
	LOC108209131	CSC1-like protein ERD4	1.31295	0.05	72.831	99.986	66.928	16	29.845	25.736
	LOC108218837	probable pectinesterase/pectinesterase inhibitor 61	1.31186	0.05	116.048	124.7	160.108	43.683	45.475	42.005
	LOC108205706	probable E3 ubiquitin-protein ligase RHB1A	1.29792	0.01	89.519	112.638	115.735	47.053	35.267	28.209
	LOC108202459	LL-diaminopimelate aminotransferase, chloroplastic	1.29637	0.05	79.834	102.68	101.475	26.355	44.401	23.268
	LOC108215725	extensin-like	1.27182	0.05	97.445	156.793	87.53	34.779	67.831	21.558
	LOC108206774	DNA-directed RNA polymerases I and III subunit RPAC2-like	1.26049	0.05	110.283	86.544	49.99	32.463	35.835	14.724
	LOC108220704	uncharacterized LOC108220704	1.235	0.05	85.969	88.901	81.99	36.026	31.209	17.267
	LOC108210624	R3H domain-containing protein 1-like	1.23276	0.05	83.512	81.258	91.682	32.792	31.662	25.947
	LOC108204479	endoglucanase 25	1.22363	0.05	122.848	102.664	100.498	50.92	37.5	30.071
	LOC108211097	heat stress transcription factor C-1-like	1.22331	0.05	104.787	124.722	145.425	27.04	42.897	48.714
	LOC108221986	chaperone protein dnaJ 11, chloroplastic-like	1.22074	0.05	97.972	69.636	95.443	45.394	24.33	25.685
	LOC108206083	inositol transporter 4-like	1.21008	0.05	88.921	105.334	76.311	27.482	25.316	35.045
	LOC108214494	protein trichome birefringence-like 19	1.20866	0.05	98.939	108.227	85.471	49.2	43.539	17.532
	LOC108223036	two pore calcium channel protein 1A-like	1.20009	0.05	140.207	91.815	106.364	56.135	40.028	30.185
	LOC108223189	hydroxypyruvate reductase	1.18231	0.05	85.715	115.874	64.964	49.293	17.98	26.896
	LOC108216327	uncharacterized LOC108216327	1.17478	0.05	134.262	110.059	67.995	54.843	26.322	30.938
	LOC108193200	vacuolar protein sorting-associated protein 55 homolog	1.13275	0.05	140.973	134.384	95.632	33.648	40.602	51.159
	LOC108210859	MKI67 FHA domain-interacting nucleolar phosphoprotein-like	1.13156	0.05	138.997	124.63	103.957	26.865	64.768	38.7
	LOC108194154	mitochondrial fission 1 protein A-like	1.12862	0.05	97.183	85.064	85.972	22.443	46.093	28.164
	LOC108225125	cysteine-rich and transmembrane domain-containing protein A	1.08776	0.05	124.338	88.737	100.728	45.583	43.099	34.106
	LOC108197252	uncharacterized protein At5g01610-like	1.08701	0.05	107.928	102.118	100.919	56.723	54.179	17.737
	LOC108220011	eukaryotic translation initiation factor NCBP	1.04125	0.05	120.807	152.787	105.198	71.276	46.067	37.722
	LOC108208815	uncharacterized LOC108208815	1.02925	0.05	116.54	146.056	77.177	67.959	40.953	26.029
17	LOC108206694	probable prefoldin subunit 4	-1.11616	0.05	72.388	86.265	53.249	169.71	115.511	126.977
	LOC108193154	ATP-dependent Clp protease proteolytic subunit 3, chloroplastic	-1.11616	0.05	37.393	60.132	42.088	148.788	77.867	64.924
	LOC108206729	ubiquitin carboxyl-terminal hydrolase 3	-1.17331	0.05	61.551	51.364	52.965	136.332	110.876	99.395
	LOC108206088	pyridoxal 5'-phosphate synthase-like subunit PDX1.2	-1.20222	0.05	43.928	35.356	49.3	144.808	70.251	78.284
	LOC108196167	nucleosome assembly protein 1;4-like	-1.23316	0.05	43.051	69.327	40.808	200.526	86.983	68.815
	LOC108196159	uncharacterized LOC108196159	-1.26279	0.05	47.405	60.432	41.746	152.998	76.957	100.092
	LOC108206171	uncharacterized LOC108206171	-1.29413	0.05	100.186	104.089	38.935	253.87	170.158	126.463
	LOC108192801	putative glycine-rich cell wall structural protein 1	-1.36442	0.05	135.372	60.227	32.259	246.403	135.375	176.048
	LOC108208976	probable ubiquitin-conjugating enzyme E2 24	-1.38347	0.05	36.641	66.241	21.138	122.743	85.498	88.33
	LOC108205042	plant UBX domain-containing protein 8	-1.55477	0.01	31.354	47.764	37.273	166.043	70.867	99.759
	LOC108194731	uncharacterized LOC108194731	-1.56342	0.05	12.46	44.233	43.363	145.321	61.031	102.368
	LOC108194309	uncharacterized LOC108194309	-1.56402	0.05	13.641	19.069	58.98	128.702	63	116.478
	LOC108202885	uncharacterized LOC108202885	-1.57053	0.05	66.697	88.001	35.197	240.127	118.264	167.452
	LOC108227615	cytochrome b5-like	-1.76209	0.001	39.793	70.761	25.39	245.698	148.642	73.058
	LOC108215408	3'-hydroxy-N-methyl-(S)-coclaurine 4'-O-methyltransferase 2-like	-1.82758	0.05	20.249	18.856	45.345	237.425	132.359	29.595
18	LOC108219016	chlorophyll a-b binding protein CP26, chloroplastic	3.92278	0.01	112.777	33.813	409.396	2.9	3.408	6.045
	LOC108209965	serine carboxypeptidase-like	3.3008	0.001	133.014	198.434	174.142	15.522	13.957	9.797
	LOC108225292	uncharacterized LOC108225292	2.9957	0.001	258.471	220.615	172.446	10.874	22.038	19.401
	LOC108209244	tubulin beta chain-like	2.98985	0.001	222.247	190.292	227.365	32.373	22.768	8.097
	LOC108193771	protein PHLOEM PROTEIN 2-LIKE A1-like	2.95721	0.001	125.027	191.364	126.112	17.395	5.579	12.725
	LOC108213574	uncharacterized LOC108213574	2.77204	0.001	298.703	260.482	76.941	9.275	28.229	16.055
	LOC108206971	tetraspanin-19-like	2.719	0.001	171.822	255.57	203.408	14.176	15.341	28.579
	LOC108198850	major allergen Dau c 1	2.69762	0.001	262.414	183.654	175.05	5.115	23.69	23.706
	LOC108219351	hippocampus abundant transcript 1 protein-like	2.65269	0.001	196.477	218.571	214.096	28.642	10.283	27.107
	LOC108192787	fructose-bisphosphate aldolase 1, chloroplastic	2.31057	0.01	170.426	201.793	322.717	33.497	13.159	41.554
	LOC108197591	pathogenesis-related protein 2	2.22493	0.001	112.623	205.079	132.518	27.228	37.071	10.344
	LOC108214642	subtilisin-like protease SBT1.7	2.2164	0.001	257.974	376.296	160.357	46.84	30.006	43.603
	LOC108207169	ankyrin repeat domain-containing protein 39-like	2.14824	0.001	148.769	159.742	164.622	49.655	23.495	11.755
	LOC108216362	fasciclin-like arabinogalactan protein 9	2.10956	0.05	213.806	95.33	145.351	21.165	33.202	22.871
	LOC108206228	FK506-binding protein 4-like	2.00842	0.001	170.984	184.123	139.105	35.886	10.675	35.084
	LOC108208055	uncharacterized LOC108208055	1.92901	0.05	201.577	267.48	55.547	11.701	5.414	43.809
	LOC108209194	patellin-4-like	1.83746	0.01	190.001	188.212	83.417	19.407	35.971	33.043
	LOC108227778	protein NBR1 homolog	1.73546	0.001	218.325	206.833	218.024	65.523	53.967	40.953
	LOC108200261	uncharacterized LOC108200261	1.68039	0.01	205.757	294.52	157.27	109.431	42.366	18.37
	LOC108204514	probable xyloglucan endotransglucosylase/hydrolase protein 28	1.64001	0.01	286.13	446.474	173.468	99.043	93.097	42.592
	LOC108200460	probable xyloglucan endotransglucosylase/hydrolase protein 30	1.62552	0.01	203.359	205.241	107.201	76.282	47.975	13.75
	LOC108205134	zinc finger protein CONSTANS-LIKE 4	1.55903	0.01	181.193	186.872	159.288	46.584	41.153	50.274
	LOC108224991	prefoldin subunit 1	1.52916	0.01	290.132	207.233	162.343	43.826	67.699	57.933
	LOC108196785	inactive beta-amylase 9	1.51004	0.01	110.427	197.324	139.34	40.141	32.403	44.673
	LOC108196400	probable glutathione S-transferase	1.43378	0.01	206.53	240.098	281.032	74.037	105.644	46.933
	LOC108196001	F-box/LRR-repeat protein 14	1.4013	0.05	151.779	217.005	193.852	96.589	29.027	57.269
	LOC108223969	dnaJ homolog subfamily B member 9	1.32306	0.05	217.365	201.322	180.61	49.964	54.687	72.637
	LOC108214736	remorin	1.31047	0.01	199.883	210.819	132.546	62.01	83.444	35.223
	LOC108225792	CCG-binding protein 1	1.30305	0.01	141.427	188.365	113.945	62.792	50.99	34.89
	LOC108210693	proteasome subunit alpha type-7	1.21698	0.05	137.121	149.667	132.859	57.723	60.906	34.398
	LOC108218844	transport inhibitor response 1-like protein	1.21458	0.05	132.756	197.055	137.425	73.398	50.715	44.754
	LOC108195135	mitogen-activated protein kinase kinase 9	1.20638	0.05	139.299	219.887	181.674	77.738	59.332	54.967
	LOC108205067	eukaryotic translation initiation factor 2 subunit gamma-like	1.19988	0.05	136.63	201.124	153.94	82.84	47.639	47.776
	LOC108210105	ras-related protein RABE1c	1.18649	0.05	286.812	267.605	175.972	79.089	116.422	65.058
	LOC108206132	pollen-specific leucine-rich repeat extensin-like protein 1	1.18403	0.05	227.279	199.953	176.038	111.096	32.205	60.386
	LOC108201748	protein LNK3	1.18374	0.05	168.77	166.442	162.543	72.487	81.711	40.251
	LOC108210936	vesicle-associated membrane protein 722	1.18316	0.05	178.653	137.222	170.385	59.085	60.803	54.717
	LOC108201692	mediator of RNA polymerase II transcription subunit 15a	1.10764	0.05	276.617	294.04	263.617	87.485	131.43	92.076
	LOC108198099	uncharacterized LOC108198099	1.0715	0.05	254.255	280.028	144.476	60.852	101.061	80.751
	LOC108209549	bifunctional dTDP-4-dehydrorhamnose 3,5-epimerase/dTDP-4-dehydrorhamnose reductase-like	1.06423	0.05	183.597	146.381	155.428	69.258	78.201	47.843
19	LOC108227305	beta-galactosidase 5-like	4.07385	0.001	31.609	49.278	29.579	1.511	1.736	1.205
	LOC108222914	ABC transporter G family member 29	3.54476	0.001	12.976	34.517	13.118	0.765	1.223	1.025
	LOC108216058	pentatricopeptide repeat-containing protein At1g07740, mitochondrial	3.13567	0.001	10.344	15.222	6.944	1.233	0.731	0.591
	LOC108199550	TMV resistance protein N-like	2.99314	0.001	16.362	18.853	14.306	1.017	1.472	1.58
	LOC108214441	G-type lectin S-receptor-like serine/threonine-protein kinase At4g27290	2.98573	0.001	9.847	12.475	17.344	1.458	0.416	1.173
	LOC108197525	glucan endo-1,3-beta-glucosidase 14-like	2.95193	0.001	35.102	19.573	46.408	5.633	1.368	1.82
	LOC108208828	protein NRT1/ PTR FAMILY 6.3-like	2.74588	0.01	9.372	28.649	14.044	1.947	2.292	1.028
	LOC108194090	probable mitochondrial import inner membrane translocase subunit TIM21	2.51904	0.001	25.887	29.22	23.669	3.631	4.452	2.132
	LOC108199557	phosphopantothenate--cysteine ligase 1-like	2.51717	0.001	22.702	30.242	32.789	3.208	4.197	3.068
	LOC108199658	glutamine synthetase, chloroplastic	2.488	0.01	18.271	22.965	3.902	2.352	1.165	1.238
	LOC108193812	E3 ubiquitin-protein ligase Topors	2.47201	0.001	20.369	28.976	23.734	5.199	3.729	1.671
	LOC108215842	uncharacterized LOC108215842	2.45612	0.001	28.401	43.862	13.418	4.943	3.414	2.774
	LOC108211712	heavy metal-associated isoprenylated plant protein 3-like	2.44514	0.001	41.156	44.359	21.524	10.471	2.89	2.737
	LOC108214991	long-chain-alcohol oxidase FAO2-like	2.43554	0.001	18.996	20.793	17.17	4.65	2.986	0.61
	LOC108209623	vignain-like	2.41436	0.001	36.818	26.849	37.755	5.138	6.465	3.05
	LOC108204554	signal recognition particle 43 kDa protein, chloroplastic	2.39662	0.05	16.835	31.668	53.601	6.755	0.958	4.121
	LOC108226062	lipase-like	2.35316	0.001	18.411	23.284	15.328	5.991	2.007	0.921
	LOC108227198	uncharacterized LOC108227198	2.31062	0.001	28.307	20.493	21.276	6.213	2.628	1.298
	LOC108223737	protein NRT1/ PTR FAMILY 1.2-like	2.30458	0.001	17.756	14.37	8.02	3.506	0.92	1.446
	LOC108214196	4-alpha-glucanotransferase, chloroplastic/amyloplastic	2.26416	0.001	14.058	13.673	17.187	2.256	2.186	2.303
	LOC108212760	uncharacterized LOC108212760	2.22883	0.001	21.624	32.985	26.317	10.62	3.348	2.036
	LOC108197980	protein TRANSPORT INHIBITOR RESPONSE 1-like	2.207	0.001	26.971	19.561	9.615	1.266	2.4	3.362
	LOC108224063	fructose-1,6-bisphosphatase, cytosolic	2.15331	0.001	25.095	27.335	25.428	7.136	4.521	2.794
	LOC108209547	haloacid dehalogenase-like hydrolase domain-containing protein Sgpp	2.13048	0.001	30.682	22.648	29.901	2.988	8.251	2.388
	LOC108211465	protein CUP-SHAPED COTYLEDON 3-like	2.12241	0.001	22.83	28.495	14.268	6.861	2.745	2.239
	LOC108214838	serine protease SPPA, chloroplastic	2.11512	0.001	9.805	15.073	9.875	1.625	2.788	1.155
	LOC108227133	probable LRR receptor-like serine/threonine-protein kinase At1g53430	2.06626	0.01	17.339	11.579	19.172	3.522	4.511	1.181
	LOC108195923	probable glycosyltransferase At5g03795	2.05759	0.001	10.385	13.894	14.784	1.615	3.976	1.284
	LOC108194137	NAC domain-containing protein 100-like	2.037	0.01	16.213	12.188	8.225	1.868	0.945	2.614
	LOC108201128	rab9 effector protein with kelch motifs-like	1.99806	0.01	12.709	14.72	5.526	2.448	2.129	1.132
	LOC108227095	sugar transporter ERD6-like 6	1.98108	0.001	34.517	47.791	32.705	7.494	7.858	6.907
	LOC108218767	probable WRKY transcription factor 3	1.96377	0.01	20.029	26.791	32.104	3.812	6.849	3.402
	LOC108204805	equilibrative nucleotide transporter 3-like	1.93189	0.05	23.885	65.155	27.463	9.348	7.425	4.821
	LOC108211113	endonuclease 1	1.91148	0.01	28.118	31.222	43.479	10.034	3.957	6.611
	LOC108210371	uncharacterized LOC108210371	1.90151	0.01	16.262	17.791	24.413	3.268	5.782	2.634
	LOC108200377	uncharacterized LOC108200377	1.89478	0.05	21.122	21.156	33.602	6.719	3.238	4.838
	LOC108196041	malonyl-coenzyme A:anthocyanin 3-O-glucoside-6''-O-malonyltransferase-like	1.88806	0.01	19.523	37.778	21.466	8.691	6.833	0.996
	LOC108196487	long chain acyl-CoA synthetase 6, peroxisomal-like	1.88113	0.001	36.079	40.158	34.827	9.44	8.701	6.35
	LOC108213018	uncharacterized LOC108213018	1.8643	0.01	16.841	14.376	8.581	3.932	1.599	2.541
	LOC108213256	putative F-box protein At3g16210	1.85112	0.01	15.502	18.451	12.095	3.625	2.435	3.286
	LOC108220223	xyloglucan endotransglucosylase/hydrolase protein 9-like	1.84444	0.01	18.377	11.519	12.673	6.469	1.419	1.472
	LOC108216454	zinc finger protein ZAT12-like	1.83365	0.01	43.841	53.156	19.153	4.471	12.269	5.479
	LOC108209763	probable polygalacturonase	1.82379	0.001	18.035	26.423	24.931	4.777	8.092	2.474
	LOC108197635	abscisic acid receptor PYL4-like	1.82219	0.01	33.286	28.186	10.996	2.637	6.488	4.343
	LOC108206921	AAA-ATPase At3g50940-like	1.81208	0.01	35.196	19.753	23.668	9.068	3.743	4.811
	LOC108211316	thioredoxin-like protein slr0233	1.79347	0.01	27.356	21.296	25.397	5.001	7.866	3.109
	LOC108219547	low-temperature-induced cysteine proteinase-like	1.79084	0.01	46.251	30.049	28.305	5.344	13.755	3.908
	LOC108214622	IAA-amino acid hydrolase ILR1-like 7	1.78631	0.01	12.695	16.712	5.908	4.212	2.403	1.365
	LOC108203186	uncharacterized LOC108203186	1.75011	0.01	9.71	15.375	8.855	2.88	1.222	2.847
	LOC108220683	BTB/POZ domain-containing protein At1g55760-like	1.70552	0.01	25.267	38.327	20.416	4.226	12.197	2.524
	LOC108227288	ABC transporter G family member 22-like	1.68832	0.01	21.504	17.16	13.943	7.658	2.153	3.84
	XLOC_003755		1.67981	0.05	15.521	15.197	7.912	5.191	2.207	2.041
	LOC108213968	putative disease resistance RPP13-like protein 3	1.67809	0.001	25.408	30.481	35.256	9.142	8.494	5.124
	LOC108224403	uncharacterized LOC108224403	1.67214	0.01	18.336	30.353	16.521	4.359	7.161	3.881
	LOC108201718	protein NRT1/ PTR FAMILY 5.10-like	1.65572	0.01	16.617	17.318	18.491	5.712	5.823	2.404
	LOC108197784	probable WRKY transcription factor 28	1.64783	0.01	29.69	37.675	36.884	12.442	9.066	6.586
	LOC108196903	probable E3 ubiquitin-protein ligase RHB1A	1.64229	0.01	30.735	42.317	36.828	12.514	11.667	5.119
	LOC108204549	general transcription factor 3C polypeptide 3	1.62266	0.01	12.103	21.332	8.717	2.622	5.243	2.523
	LOC108210062	serine/threonine-protein kinase D6PKL2	1.61342	0.05	14.599	11.396	10.798	1.399	4.625	2.469
	LOC108225778	U1 small nuclear ribonucleoprotein C-like	1.60226	0.05	15.657	14.208	12.262	3.358	6.428	0.749
	LOC108195634	uncharacterized LOC108195634	1.59245	0.01	20.722	20.423	23.885	5.35	6.212	4.723
	LOC108195639	uncharacterized LOC108195639	1.59245	0.01	20.722	20.423	23.885	5.35	6.212	4.723
	LOC108215834	UPF0481 protein At3g47200-like	1.58565	0.05	23.197	31.896	25.184	14.981	2.986	1.638
	LOC108214061	ATPase family AAA domain-containing protein 1-B-like	1.58495	0.05	19.192	33.268	17.281	10.872	3.112	4.162
	LOC108205184	uncharacterized LOC108205184	1.58462	0.01	13.19	25.891	18.701	7.861	3.304	4.144
	LOC108203054	uncharacterized LOC108203054	1.57996	0.01	14.534	22.709	10.959	4.727	4.359	3.277
	LOC108223232	chloride channel protein CLC-c-like	1.57226	0.001	26.87	45.341	24.627	9.937	8.359	7.458
	LOC108204351	2-oxoisovalerate dehydrogenase subunit alpha 2, mitochondrial-like	1.56673	0.05	17.113	20.738	8.635	8.745	2.494	1.337
	LOC108209873	vesicle transport protein GOT1B	1.56179	0.05	31.559	33.858	25.509	4.24	6.497	9.456
	LOC108202827	fatty acid amide hydrolase	1.55991	0.01	26.555	26.46	29.002	11.037	5.115	6.712
	LOC108204989	3-isopropylmalate dehydratase small subunit 3-like	1.54989	0.05	22.184	17.556	7.784	3.156	6.16	3.088
	LOC108200246	uncharacterized LOC108200246	1.54912	0.01	19.205	21.43	14.206	8.47	5.192	2.419
	LOC108202713	uncharacterized LOC108202713	1.54226	0.05	26.466	34.961	26.083	6.826	23.388	6.796
	LOC108223050	alpha-mannosidase-like	1.52949	0.01	24.559	23.801	24.86	10.509	7.165	4.211
	LOC108209124	aldose 1-epimerase-like	1.52309	0.05	27.404	28.247	9.819	7.324	8.727	1.377
	LOC108200546	histone deacetylase 6	1.51573	0.05	39.482	25.614	34.128	7.464	11.992	6.042
	LOC108218673	peroxisome biogenesis protein 1	1.51054	0.01	21.265	26.703	18.605	6.845	6.905	5.628
	LOC108219992	protein NRT1/ PTR FAMILY 6.2-like	1.50974	0.01	31.036	32.076	26.188	10.025	8.108	7.458
	LOC108205339	uncharacterized LOC108205339	1.50926	0.01	36.728	27.99	32.18	8.61	14.787	4.216
	LOC108193209	heparanase-like protein 1	1.50676	0.05	21.133	41.78	19.973	7.787	7.933	4.222
	LOC108209591	uncharacterized LOC108209591	1.49958	0.05	13.002	14.221	14.471	7.3	3.531	1.96
	LOC108205743	perakine reductase-like	1.4926	0.01	41.836	45.929	19.876	12.73	7.189	9.016
	LOC108219849	UDP-galactose transporter 2-like	1.48698	0.01	29.972	33.786	18.387	11.934	4.961	6.229
	LOC108219767	putative glycerol-3-phosphate transporter 1	1.48649	0.01	33.822	30.585	22.853	12.888	6.761	6.149
	LOC108215403	ribosome-binding protein 1	1.48232	0.05	19.012	23.302	8.964	2.43	6.653	3.824
	LOC108196924	inactive LRR receptor-like serine/threonine-protein kinase BIR2	1.48185	0.05	37.317	32.291	24.154	2.585	11.532	8.534
	LOC108223532	auxin transporter-like protein 4	1.48181	0.01	19.733	30.81	15.988	5.885	8.56	4.192
	LOC108205507	zinc transporter 4, chloroplastic	1.47745	0.01	26.452	42.917	19.129	6.97	8.837	7.104
	LOC108197052	high-light-induced protein, chloroplastic	1.46865	0.05	26.386	32.363	31.054	16.262	6.54	4.18
	LOC108204476	phosphatidylinositol 4-phosphate 5-kinase 7-like	1.4673	0.01	12.282	23.172	12.268	6.112	5.255	2.885
	LOC108215215	preprotein translocase subunit SCY1, chloroplastic	1.45794	0.05	14.535	15.034	16.18	7.512	5.271	1.665
	LOC108210141	F-box/kelch-repeat protein At3g23880-like	1.44272	0.05	27.919	60.562	23.379	16.215	11.459	5.387
	LOC108210158	uncharacterized LOC108210158	1.43641	0.05	27.345	30.274	19.257	3.823	3.662	9.991
	LOC108223308	inner membrane protein PPF-1, chloroplastic	1.43332	0.01	24.26	35.242	29.137	8.901	7.43	8.993
	LOC108193053	uncharacterized LOC108193053	1.4303	0.05	15.331	23.402	10.29	4.309	6.454	3.159
	LOC108206915	probable glycosyltransferase At5g03795	1.42473	0.05	13.468	14.356	8.209	2.731	4.155	3.109
	LOC108205262	putative F-box protein PP2-B12	1.42139	0.05	14.804	31.91	24.576	5.679	9.35	5.314
	LOC108224230	protein WVD2-like 4	1.41972	0.01	26.623	29.713	21.576	11.265	8.684	4.823
	LOC108227542	uncharacterized LOC108227542	1.38347	0.05	37.741	33.58	35.181	17.04	11.213	6.608
	LOC108224127	uncharacterized LOC108224127	1.37567	0.05	20.604	15.45	11.527	9.35	4.006	2.278
	LOC108200289	BTB/POZ domain-containing protein At1g67900	1.35952	0.05	13.323	20.131	6.928	5.59	5.108	2.001
	LOC108215104	probable trehalase	1.35552	0.01	20.047	26.283	19.18	6.539	9.455	4.966
	LOC108200054	protein IQ-DOMAIN 1-like	1.35215	0.05	31.66	32.09	12.214	12.133	7.371	4.547
	LOC108215212	uncharacterized aarF domain-containing protein kinase At1g79600, chloroplastic-like	1.34619	0.05	9.032	13.017	13.319	2.887	2.905	4.281
	LOC108211032	nudix hydrolase 19, chloroplastic-like	1.34515	0.05	23.17	26.981	31.594	13.516	11.649	2.7
	LOC108200249	lipase	1.33995	0.05	33.929	26.476	13.472	8.552	8.25	6.115
	LOC108204633	fumarate hydratase 1, mitochondrial	1.33205	0.05	28.351	37.443	26.709	16.826	13.17	4.425
	LOC108214562	villin-4-like	1.3313	0.05	14.659	19.586	12.05	6.537	6.648	1.996
	LOC108219499	probable amino acid permease 7	1.3311	0.05	23.619	21.955	29.693	8.166	6.675	8.232
	LOC108218459	D-lactate dehydrogenase [cytochrome], mitochondrial	1.32812	0.05	16.042	17.381	15.643	1.977	8.093	4.05
	LOC108218574	diacylglycerol kinase 7	1.32463	0.05	42.845	40.354	26.476	3.646	15.418	11.171
	LOC108202769	HIPL1 protein-like	1.32326	0.05	16.368	28.327	24.409	4.558	9.12	6.725
	LOC108209751	probable calcium-binding protein CML29	1.31821	0.05	34.854	36.709	33.911	16.038	12	7.287
	LOC108211510	single-stranded DNA-binding protein, mitochondrial	1.31575	0.05	38.249	27.275	18.36	9.585	9.249	7.428
	LOC108216134	ribosomal RNA small subunit methyltransferase NEP1-like	1.31233	0.05	31.706	45.241	25.715	8.965	11.144	10.85
	LOC108214460	cell division cycle 20.1, cofactor of APC complex-like	1.30998	0.05	13.635	12.145	19.643	3.281	7.556	3.581
	LOC108196676	chromophore lyase CRL, chloroplastic	1.30813	0.05	23.68	30.345	25.952	11.072	9.901	5.943
	LOC108209326	elongation factor G-2, chloroplastic	1.30719	0.05	18.058	23.176	14.988	4.176	7.688	5.435
	LOC108206385	IRK-interacting protein-like	1.30472	0.05	22.062	20.456	14.534	6.02	8.254	4.233
	LOC108216176	syntaxin-132-like	1.30449	0.05	26.913	33.137	19.086	11.432	10.603	4.506
	LOC108210723	transmembrane protein 120 homolog	1.28089	0.05	36.135	40.288	26.215	16.856	9.509	8.577
	LOC108193147	glycerol kinase	1.27757	0.05	17.933	36.514	19.229	5.179	9.569	7.521
	LOC108223505	auxin response factor 18-like	1.2741	0.01	21.309	33.04	21.965	11.532	8.194	6.599
	LOC108214986	uncharacterized LOC108214986	1.27343	0.05	17.447	19.763	15.895	4.865	9.396	3.555
	LOC108200765	uncharacterized LOC108200765	1.27315	0.05	35.209	42.699	29.116	9.881	18.097	7.595
	LOC108220126	E3 ubiquitin-protein ligase RHF2A-like	1.26569	0.05	20.986	38.335	18.401	9.983	8.883	6.852
	LOC108194726	trihelix transcription factor ASR3	1.26516	0.05	30.733	45.085	31.02	5.793	13.665	12.076
	LOC108197984	sphingosine kinase 2-like	1.26055	0.05	24.207	27.136	12.496	5.926	8.412	5.629
	LOC108196773	vacuolar protein sorting-associated protein 52 A	1.25212	0.01	36.419	40.075	32.219	19.524	11.586	8.354
	LOC108210978	eukaryotic translation initiation factor 3 subunit J-like	1.24386	0.05	29.093	36.011	20.971	12.486	10.526	6.998
	LOC108227819	uncharacterized LOC108227819	1.23223	0.05	17.398	19.926	10.653	3.939	9.829	2.363
	LOC108204976	uncharacterized LOC108204976	1.20475	0.05	11.376	15.25	14.611	5.391	6.241	3.474
	LOC108215972	fasciclin-like arabinogalactan protein 4	1.18327	0.05	23.367	25.966	30.25	12.546	9.18	7.793
	LOC108196030	flocculation protein FLO11	1.18248	0.05	20.386	36.428	20.544	10.528	10.372	7.49
	LOC108227879	probable serine/threonine-protein kinase WNK10	1.17	0.05	12.394	16.711	14.758	4.209	7.37	4.372
	LOC108218908	glycerophosphodiester phosphodiesterase GDPDL3-like	1.16392	0.05	33.982	34.458	34.525	19.495	16.5	4.953
	LOC108219837	enoyl-CoA hydratase 2, peroxisomal-like	1.15046	0.05	27.834	37.94	42.158	9.664	18.222	10.899
	LOC108199731	conserved oligomeric Golgi complex subunit 3	1.14573	0.05	32.903	36.336	21.435	8.396	17.605	6.823
	LOC108224013	protein HOMOLOG OF MAMMALIAN LYST-INTERACTING PROTEIN 5-like	1.13294	0.05	28.043	30.898	19.216	6.953	13.074	7.69
	LOC108210111	adenosine deaminase-like protein	1.12957	0.05	18.924	26.545	21.573	11.315	7.806	6.857
	LOC108204381	vacuolar-sorting receptor 6-like	1.12471	0.05	15.359	26.792	16.91	6.854	10.537	4.907
	LOC108196857	probable inactive purple acid phosphatase 1	1.10349	0.05	21.755	28.248	25.945	15.664	8.778	7.325
	LOC108218692	triacylglycerol lipase SDP1	1.08802	0.05	23.594	38.528	14.638	13.622	8.885	7.476
	LOC108215026	serine/threonine-protein kinase ATG1c-like	1.08119	0.05	14.542	17.03	14.235	8.812	6.088	3.917
	LOC108198145	uncharacterized LOC108198145	1.07012	0.05	19.418	20.987	14.621	8.116	7.517	5.97
	LOC108223404	ABSCISIC ACID-INSENSITIVE 5-like protein 5	1.06906	0.05	23.233	34.509	14.974	10.888	9.435	6.881
	LOC108199350	pumilio homolog 5-like	1.01234	0.05	27.128	30.897	21.923	14.441	12.98	6.72
20	LOC108224526	cysteine protease XCP2-like	4.52721	0.001	292.758	195.564	332.829	14.658	6.293	2.997
	LOC108218282	chlorophyll a-b binding protein 8, chloroplastic	3.46572	0.05	195.699	109.246	849.741	17.59	11.513	19.801
	LOC108195961	beta-D-xylosidase 1-like	3.45848	0.001	455.068	650.149	191.777	9.458	11.45	30.581
	LOC108225089	cysteine protease RD19A	3.37004	0.01	359.843	264.069	587.739	29.205	22.099	26.885
	LOC108204900	aspartic proteinase A1-like	2.43831	0.01	238.972	328.039	469.786	60.175	27.189	48.411
	LOC108220629	E3 ubiquitin-protein ligase ATL23	2.37212	0.001	590.842	871.533	428.388	63.324	116.475	79.718
	LOC108196996	chlorophyll a-b binding protein CP29.2, chloroplastic	2.36361	0.05	130.44	44.297	917.484	6.381	10.549	13.792
	LOC108211661	uncharacterized LOC108211661	2.17588	0.01	489.224	544.53	298.994	8.988	103.767	53.213
	LOC108211211	putative methyltransferase DDB_G0268948	1.94932	0.001	275.084	302.674	341.777	36.472	94.535	45.938
	LOC108193402	chlorophyll a-b binding protein, chloroplastic-like	1.93321	0.05	127.942	9.232	1054.87	5.303	3.918	7.611
	LOC108218832	probable glutathione S-transferase	1.86726	0.01	301.24	337.021	437.985	59.055	16.163	98.639
	LOC108193756	protein PHLOEM PROTEIN 2-LIKE A1-like	1.55115	0.05	241.252	456.908	214.599	46.711	73.095	89.829
	LOC108197064	60S ribosomal protein L27-like	1.49005	0.05	673.243	456.359	406.579	304.008	72.353	63.37
	LOC108221843	uncharacterized LOC108221843	1.47861	0.05	385.096	565.647	230.728	94.901	160.932	61.973
	LOC108220270	putative protein TPRXL	1.42449	0.05	604.71	493.446	269.466	52.612	175.335	122.209
	LOC108223159	VQ motif-containing protein 4	1.21217	0.05	284.537	265.66	283.207	78.959	85.915	109.143
21	LOC108193732	allene oxide cyclase 4, chloroplastic-like	-1.2315	0.05	54.307	116.579	60.384	226.345	164.474	116.648
	LOC108192515	LOB domain-containing protein 41-like	-1.24501	0.05	67.604	65.204	33.759	136.331	131.609	92.607
	LOC108195953	protein BRICK 1	-1.25257	0.05	40.087	64.786	42.214	105.752	131.976	83.479
	LOC108206732	2-methyl-6-phytyl-1,4-hydroquinone methyltransferase, chloroplastic-like	-1.29682	0.05	59.201	43.277	51.971	133.961	126.153	97.592
	LOC108223320	pyruvate decarboxylase 1	-1.32038	0.05	67.388	63.483	62.096	239.064	172.814	77.387
	LOC108217628	14-3-3-like protein GF14 kappa	-1.38483	0.05	78.454	42.962	41.823	152.204	168.628	91.109
	LOC108192895	putative glucose-6-phosphate 1-epimerase	-1.39513	0.05	30.177	57.153	52.563	128.762	125.837	94.397
	LOC108223908	ganglioside-induced differentiation-associated protein 2	-1.50152	0.01	42.714	51.57	41.915	64.251	166.971	126.389
	LOC108195239	uncharacterized LOC108195239	-1.5031	0.01	33.959	60.585	36.954	79.868	134.495	121.442
	LOC108204680	short-chain dehydrogenase/reductase 2b-like	-1.52836	0.05	47.926	56.099	22.487	203.842	147.657	39.52
	LOC108196875	2-alkenal reductase (NADP(+)-dependent)-like	-1.55853	0.01	41.505	35.32	62.795	163.896	127.729	121.24
	LOC108220564	heterodimeric geranylgeranyl pyrophosphate synthase small subunit, chloroplastic-like	-1.62623	0.01	34.947	34.135	48.798	65.895	186.09	111.205
	LOC108206540	putative glutathione-specific gamma-glutamylcyclotransferase 2	-1.65338	0.001	32.081	50.623	29.192	92.339	165.517	77.096
	LOC108208041	ethylene-responsive transcription factor 12-like	-1.66327	0.001	43.641	45.142	36.911	124.71	155.923	92.453
	LOC108193628	ethylene-responsive transcription factor 12	-1.68962	0.001	59.442	48.459	25.872	149.371	126.338	118.351
	LOC108203166	thaumatin-like protein	-1.86225	0.001	45.39	36.36	29.608	122.715	147.867	108.958
	LOC108224470	bet1-like protein At4g14600	-1.90647	0.001	35.085	36.921	22.974	106.285	148.205	82.627
	LOC108223756	allene oxide synthase 1, chloroplastic	-1.93119	0.05	17.607	51.9	40.426	200.579	243.047	48.364
	LOC108222006	cysteine-rich and transmembrane domain-containing protein A-like	-1.94254	0.01	37.225	18.673	25.342	52.518	172.936	95.274
	LOC108197006	ethylene-responsive transcription factor RAP2-3-like	-2.16139	0.001	27.393	27.892	34.08	85.225	190.208	102.352
	LOC108196394	zinc finger CCCH domain-containing protein 29-like	-2.2047	0.001	35.905	33.78	26.074	242.681	202.835	51.728
	LOC108207999	protein SENESCENCE-ASSOCIATED GENE 21, mitochondrial-like	-2.30791	0.001	25.649	51.111	5.659	123.583	200.534	117.492
	LOC108211082	F-box protein At3g44326-like	-2.33663	0.001	24.378	48.905	13.285	176.058	223.869	71.234
	LOC108225257	NAC domain-containing protein 41	-2.71306	0.01	10.763	36.794	7.859	175.473	240.696	45.858
	LOC108212818	F-box protein At2g27310-like	-2.96666	0.001	12.623	30.385	6.451	138.365	139.79	135.091
	LOC108217778	uncharacterized LOC108217778	-3.03262	0.05	9.169	15.142	2.836	70.498	208.063	32.632
	LOC108220653	cytochrome P450 76A2-like	-3.06672	0.001	10.357	3.534	19.185	237.907	154.193	52.838
22	LOC108209997	hexokinase-1-like	-1.26474	0.05	20	25.342	31.194	68.503	44.433	57.516
	LOC108210946	uncharacterized LOC108210946	-1.39406	0.05	39.804	21.613	9.631	98.778	56.571	34.388
	LOC108205056	probable pectinesterase/pectinesterase inhibitor 51	-1.48363	0.01	22.953	11.499	15.367	82.829	43.062	23.916
	LOC108198698	uncharacterized LOC108198698	-1.54882	0.05	8.12	18.32	24.539	71.742	29.027	56.441
	LOC108227458	zeatin O-glucosyltransferase-like	-1.6939	0.001	16.144	15.785	22.221	65.752	52.766	45.452
	LOC108209913	BAG family molecular chaperone regulator 5, mitochondrial	-1.71524	0.001	19.346	18.193	10.285	75.157	35.452	39.508
	LOC108202969	CTP synthase-like	-1.76257	0.001	16.366	24.501	12.334	93.73	45.749	38.505
	LOC108217685	ethylene-responsive transcription factor 2-like	-1.76377	0.01	28.492	35.302	6.43	123.21	54.981	65.798
	LOC108216239	DNA-directed RNA polymerase III subunit rpc9-like	-1.82162	0.05	17.769	21.335	7.599	124.026	38.124	51.761
	LOC108219317	probable WRKY transcription factor 33	-1.85126	0.05	7.588	20.128	7.507	73.406	62.135	11.83
	LOC108197518	S-linalool synthase	-1.976	0.001	17.498	17.426	11.929	107.578	39.248	43.414
	LOC108205150	ABC transporter G family member 11-like	-1.97907	0.001	19.172	13.859	14.549	110.593	64.652	29.973
	LOC108202890	uncharacterized LOC108202890	-2.04573	0.001	17.162	8.494	18.274	90.585	56.229	49.883
	LOC108227568	glyceraldehyde-3-phosphate dehydrogenase GAPCP2, chloroplastic-like	-2.12288	0.001	10.818	14.231	16.044	72.614	63.419	44.047
	LOC108197376	cytochrome P450 76A2-like	-2.3722	0.001	10.758	11.046	8.014	80.048	66.256	22.121
	LOC108205010	ABC transporter G family member 11-like	-2.3879	0.01	8.051	14.631	7.359	116.035	46.092	22.523
	LOC108217562	(-)-germacrene D synthase-like	-2.3892	0.001	8.977	16.626	14.848	83.645	55.614	73.645
	LOC108196198	histidine kinase 4-like	-2.57931	0.001	3.691	4.625	10.183	80.444	54.287	14.066
	LOC108210687	calcium-binding protein PBP1-like	-2.58117	0.01	13.089	12.644	3.463	143.679	64.881	21.169
	LOC108196353	cryptochrome-1-like	-2.59919	0.001	8.459	12.018	9.038	89.766	50.525	40.527
	LOC108210020	UDP-arabinose 4-epimerase 1	-3.04421	0.001	6.7	8.139	6.686	116.266	74.287	25.866
	LOC108192622	cytochrome P450 83B1-like	-3.4795	0.001	7.728	2.901	2.533	79.474	73.104	15.236
	LOC108196505	linoleate 13S-lipoxygenase 3-1, chloroplastic-like	-3.78865	0.001	1.106	5.561	0.735	105.933	88.082	9.451

## Sheet: Enrichment - S25
Comparison	Cluster ID	GO Term	Adjusted p-value	In Set	Total	Type	Dscription
w_c.1	1	GO:0009607	0.028171	1	32	BP	response to biotic stimulus
w_c.1	1	GO:0009664	0.024757	1	28	BP	plant-type cell wall organization
w_c.1	1	GO:0005576	0.039586	1	46	CC	extracellular region
w_c.1	1	GO:0004869	0.009527	1	10	MF	cysteine-type endopeptidase inhibitor activity
w_c.1	2	GO:0006857	0.04021	2	91	BP	oligopeptide transport
w_c.1	2	GO:0009058	0.019268	3	165	BP	biosynthetic process
w_c.1	2	GO:0009073	0.030005	1	7	BP	aromatic amino acid family biosynthetic process
w_c.1	2	GO:0015629	0.037196	1	9	CC	actin cytoskeleton
w_c.1	2	GO:0003779	0.021548	2	63	MF	actin binding
w_c.1	2	GO:0004106	0.011601	1	2	MF	chorismate mutase activity
w_c.1	2	GO:0005515	0.000631	2	3033	MF	protein binding
w_c.1	2	GO:0008270	0.035457	1	1375	MF	zinc ion binding
w_c.1	2	GO:0008889	0.047883	1	12	MF	glycerophosphodiester phosphodiesterase activity
w_c.1	2	GO:0016209	0.022711	1	5	MF	antioxidant activity
w_c.1	2	GO:0016844	0.000969	2	11	MF	strictosidine synthase activity
w_c.1	3	GO:0009765	8e-05	2	24	BP	photosynthesis, light harvesting
w_c.1	3	GO:0016020	0.022746	3	1301	CC	membrane
w_c.1	4	GO:0006633	0.037637	1	88	BP	fatty acid biosynthetic process
w_c.1	4	GO:0000036	0.005232	1	11	MF	acyl carrier activity
w_c.1	4	GO:0015035	0.048294	1	114	MF	protein disulfide oxidoreductase activity
w_c.1	4	GO:0019843	0.006092	1	13	MF	rRNA binding
w_c.1	4	GO:0031177	0.004353	1	9	MF	phosphopantetheine binding
w_c.1	4	GO:0048037	0.011688	1	26	MF	cofactor binding
w_c.1	5	GO:0008168	0.000431	2	143	MF	methyltransferase activity
w_c.1	5	GO:0008171	1.3e-05	2	23	MF	O-methyltransferase activity
w_c.1	5	GO:0046983	0.000668	2	179	MF	protein dimerization activity
w_c.1	5	GO:0005529	0.03656	1	148	MF	sugar binding
w_c.1	6	GO:0009765	0.012846	1	25	BP	photosynthesis, light harvesting
w_c.1	7	GO:0015991	0.033551	1	36	BP	ATP hydrolysis coupled proton transport
w_c.1	7	GO:0033178	0.014771	1	15	CC	proton-transporting two-sector ATPase complex, catalytic domain
w_c.1	7	GO:0003755	0.03444	1	37	MF	peptidyl-prolyl cis-trans isomerase activity
w_c.1	7	GO:0046961	0.021109	1	22	MF	proton-transporting ATPase activity, rotational mechanism
w_c.1	8	GO:0006801	0.009266	1	9	BP	superoxide metabolic process
w_c.1	8	GO:0015986	0.00018	2	21	BP	ATP synthesis coupled proton transport
w_c.1	8	GO:0033014	0.007434	1	7	BP	tetrapyrrole biosynthetic process
w_c.1	8	GO:0000276	2e-05	2	6	CC	mitochondrial proton-transporting ATP synthase complex, coupling factor F(o)
w_c.1	8	GO:0016272	0.007434	1	7	CC	prefoldin complex
w_c.1	8	GO:0004784	0.008374	1	8	MF	superoxide dismutase activity
w_c.1	8	GO:0008483	0.012016	1	12	MF	transaminase activity
w_c.1	8	GO:0015078	0.00023	2	24	MF	hydrogen ion transmembrane transporter activity
w_c.1	10	GO:0009306	0.002461	1	2	BP	protein secretion
w_c.1	10	GO:0051603	0.022244	1	27	BP	proteolysis involved in cellular protein catabolic process
w_c.1	10	GO:0005839	0.022244	1	27	CC	proteasome core complex
w_c.1	10	GO:0019773	0.010455	1	12	CC	proteasome core complex, alpha-subunit complex
w_c.1	10	GO:0004175	0.016777	1	20	MF	endopeptidase activity
w_c.1	10	GO:0004298	0.022244	1	27	MF	threonine-type endopeptidase activity
w_c.1	10	GO:0008565	0.03079	1	38	MF	protein transporter activity
w_c.1	11	GO:0006355	0.000225	3	1150	BP	regulation of transcription, DNA-dependent
w_c.1	11	GO:0006468	0.011299	7	1173	BP	protein phosphorylation
w_c.1	11	GO:0006508	0.046478	2	478	BP	proteolysis
w_c.1	11	GO:0006952	0.049822	5	176	BP	defense response
w_c.1	11	GO:0008152	0.049861	15	861	BP	metabolic process
w_c.1	11	GO:0009432	0.039837	1	2	BP	SOS response
w_c.1	11	GO:0005634	0.004253	2	732	CC	nucleus
w_c.1	11	GO:0016020	0.004575	7	1297	CC	membrane
w_c.1	11	GO:0016021	0.019456	4	792	CC	integral to membrane
w_c.1	11	GO:0003676	0.021856	4	777	MF	nucleic acid binding
w_c.1	11	GO:0003677	0.000467	4	1211	MF	DNA binding
w_c.1	11	GO:0003700	0.015365	2	601	MF	sequence-specific DNA binding transcription factor activity
w_c.1	11	GO:0004144	0.002043	3	18	MF	diacylglycerol O-acyltransferase activity
w_c.1	11	GO:0004564	0.039837	1	2	MF	beta-fructofuranosidase activity
w_c.1	11	GO:0004575	0.039837	1	2	MF	sucrose alpha-glucosidase activity
w_c.1	11	GO:0004672	0.011476	7	1171	MF	protein kinase activity
w_c.1	11	GO:0004713	0.030042	7	1022	MF	protein tyrosine kinase activity
w_c.1	11	GO:0004930	0.027601	1	1	MF	G-protein coupled receptor activity
w_c.1	11	GO:0005515	0.007736	26	3009	MF	protein binding
w_c.1	11	GO:0005524	0.001267	15	2298	MF	ATP binding
w_c.1	11	GO:0008239	0.027601	1	1	MF	dipeptidyl-peptidase activity
w_c.1	11	GO:0008270	0.048563	12	1364	MF	zinc ion binding
w_c.1	11	GO:0016301	0.040856	2	25	MF	kinase activity
w_c.1	11	GO:0016758	0.003204	8	199	MF	transferase activity, transferring hexosyl groups
w_c.1	11	GO:0016884	0.026336	2	19	MF	carbon-nitrogen ligase activity, with glutamine as amido-N-donor
w_c.1	11	GO:0043531	0.028215	5	145	MF	ADP binding
w_c.1	12	GO:0009765	0.0002	2	24	BP	photosynthesis, light harvesting
w_c.1	12	GO:0006412	0.026427	2	324	BP	translation
w_c.1	12	GO:0005840	0.025381	2	317	CC	ribosome
w_c.1	12	GO:0003735	0.027281	2	330	MF	structural constituent of ribosome
w_c.1	12	GO:0047134	0.042148	1	49	MF	protein-disulfide reductase activity
w_c.1	13	GO:0005507	0.022016	1	117	MF	copper ion binding
w_c.1	14	GO:0009664	0.017793	1	28	BP	plant-type cell wall organization
w_c.1	14	GO:0005199	0.003732	1	5	MF	structural constituent of cell wall
w_c.1	14	GO:0005215	0.0117	2	293	MF	transporter activity
w_c.1	14	GO:0050662	0.045005	1	74	MF	coenzyme binding
w_c.2	1	GO:0009765	0.042112	1	25	BP	photosynthesis, light harvesting
w_c.2	1	GO:0015979	0	9	41	BP	photosynthesis
w_c.2	1	GO:0015986	0.037417	1	22	BP	ATP synthesis coupled proton transport
w_c.2	1	GO:0042549	1.5e-05	2	2	BP	photosystem II stabilization
w_c.2	1	GO:0009522	0	3	7	CC	photosystem I
w_c.2	1	GO:0009523	0	6	27	CC	photosystem II
w_c.2	1	GO:0009538	3.6e-05	2	4	CC	photosystem I reaction center
w_c.2	1	GO:0009654	0	5	19	CC	oxygen evolving complex
w_c.2	1	GO:0019898	0	4	16	CC	extrinsic to membrane
w_c.2	1	GO:0042651	2.4e-05	2	3	CC	thylakoid membrane
w_c.2	1	GO:0045261	0.013314	1	7	CC	proton-transporting ATP synthase complex, catalytic core F(1)
w_c.2	1	GO:0005509	0.000215	4	192	MF	calcium ion binding
w_c.2	1	GO:0005516	0.029477	1	17	MF	calmodulin binding
w_c.2	1	GO:0046933	0.031121	1	18	MF	hydrogen ion transporting ATP synthase activity, rotational mechanism
w_c.2	1	GO:0046961	0.037417	1	22	MF	proton-transporting ATPase activity, rotational mechanism
w_c.2	2	GO:0006184	0.010001	2	81	BP	GTP catabolic process
w_c.2	2	GO:0006950	0.00631	2	63	BP	response to stress
w_c.2	2	GO:0009415	0.011843	1	5	BP	response to water
w_c.2	2	GO:0015995	0.006022	1	2	BP	chlorophyll biosynthetic process
w_c.2	2	GO:0042823	0.011843	1	5	BP	pyridoxal phosphate biosynthetic process
w_c.2	2	GO:0051258	0.03284	1	16	BP	protein polymerization
w_c.2	2	GO:0009512	0.006022	1	2	CC	cytochrome b6f complex
w_c.2	2	GO:0015934	0.038488	1	19	CC	large ribosomal subunit
w_c.2	2	GO:0043234	0.03284	1	16	CC	protein complex
w_c.2	2	GO:0003924	0.029308	2	148	MF	GTPase activity
w_c.2	2	GO:0004332	0.017685	1	8	MF	fructose-bisphosphate aldolase activity
w_c.2	2	GO:0005525	0.00906	3	240	MF	GTP binding
w_c.2	2	GO:0016851	0.006022	1	2	MF	magnesium chelatase activity
w_c.2	3	GO:0000272	0.003489	1	7	BP	polysaccharide catabolic process
w_c.2	3	GO:0007017	0.008685	1	19	BP	microtubule-based process
w_c.2	3	GO:0005875	0.002191	1	4	CC	microtubule associated complex
w_c.2	3	GO:0016161	0.003489	1	7	MF	beta-amylase activity
w_c.2	4	GO:0007017	0.046523	1	19	BP	microtubule-based process
w_c.2	4	GO:0051258	0.039839	1	16	BP	protein polymerization
w_c.2	4	GO:0005874	0.039839	1	16	CC	microtubule
w_c.2	4	GO:0043234	0.039839	1	16	CC	protein complex
w_c.2	4	GO:0045261	0.019117	1	7	CC	proton-transporting ATP synthase complex, catalytic core F(1)
w_c.2	4	GO:0004190	0.026071	2	113	MF	aspartic-type endopeptidase activity
w_c.2	4	GO:0005515	0.005173	1	3034	MF	protein binding
w_c.2	4	GO:0016628	0.00504	1	1	MF	oxidoreductase activity, acting on the CH-CH group of donors, NAD or NADP as acceptor
w_c.2	4	GO:0046933	0.044321	1	18	MF	hydrogen ion transporting ATP synthase activity, rotational mechanism
w_c.2	5	GO:0006730	0.005232	1	5	BP	one-carbon metabolic process
w_c.2	5	GO:0004013	0.004366	1	4	MF	adenosylhomocysteinase activity
w_c.2	5	GO:0019904	6.5e-05	2	13	MF	protein domain specific binding
w_c.2	6	GO:0006099	0.001518	2	14	BP	tricarboxylic acid cycle
w_c.2	6	GO:0006508	0.022003	5	475	BP	proteolysis
w_c.2	6	GO:0006556	0.034342	1	8	BP	S-adenosylmethionine biosynthetic process
w_c.2	6	GO:0015977	0.030544	1	7	BP	carbon fixation
w_c.2	6	GO:0043086	0.016411	2	53	BP	negative regulation of catalytic activity
w_c.2	6	GO:0044262	0.026878	1	6	BP	cellular carbohydrate metabolic process
w_c.2	6	GO:0005576	0.012262	2	45	CC	extracellular region
w_c.2	6	GO:0004197	0.00491	2	27	MF	cysteine-type endopeptidase activity
w_c.2	6	GO:0004478	0.034342	1	8	MF	methionine adenosyltransferase activity
w_c.2	6	GO:0004602	0.045244	1	11	MF	glutathione peroxidase activity
w_c.2	6	GO:0005515	0.002278	3	3032	MF	protein binding
w_c.2	6	GO:0008234	0.029885	2	75	MF	cysteine-type peptidase activity
w_c.2	6	GO:0008964	0.019373	1	4	MF	phosphoenolpyruvate carboxylase activity
w_c.2	6	GO:0042802	0.016411	2	53	MF	identical protein binding
w_c.2	6	GO:0046912	0.019373	1	4	MF	transferase activity, transferring acyl groups, acyl groups converted into alkyl on transfer
w_c.2	7	GO:0006412	0.013644	3	323	BP	translation
w_c.2	7	GO:0006414	0.049996	1	29	BP	translational elongation
w_c.2	7	GO:0006457	0.004984	3	219	BP	protein folding
w_c.2	7	GO:0033014	0.013796	1	7	BP	tetrapyrrole biosynthetic process
w_c.2	7	GO:0005622	0.041054	4	893	CC	intracellular
w_c.2	7	GO:0005840	0.012903	3	316	CC	ribosome
w_c.2	7	GO:0016272	0.013796	1	7	CC	prefoldin complex
w_c.2	7	GO:0042651	0.008695	1	4	CC	thylakoid membrane
w_c.2	7	GO:0003735	0.014251	3	329	MF	structural constituent of ribosome
w_c.2	7	GO:0003746	0.040192	1	23	MF	translation elongation factor activity
w_c.2	7	GO:0004332	0.015531	1	8	MF	fructose-bisphosphate aldolase activity
w_c.2	7	GO:0005516	0.030545	1	17	MF	calmodulin binding
w_c.2	7	GO:0008121	0.008695	1	4	MF	ubiquinol-cytochrome-c reductase activity
w_c.2	7	GO:0008483	0.022218	1	12	MF	transaminase activity
w_c.2	7	GO:0016679	0.005285	1	2	MF	oxidoreductase activity, acting on diphenols and related substances as donors
w_c.2	7	GO:0051082	0.020963	2	140	MF	unfolded protein binding
w_c.2	7	GO:0051537	0.035494	1	20	MF	2 iron, 2 sulfur cluster binding
w_c.2	8	GO:0005985	0.005597	1	8	BP	sucrose metabolic process
w_c.2	8	GO:0006631	0.005597	1	8	BP	fatty acid metabolic process
w_c.2	8	GO:0009416	0.024407	1	39	BP	response to light stimulus
w_c.2	8	GO:0033014	0.004966	1	7	BP	tetrapyrrole biosynthetic process
w_c.2	8	GO:0055114	0.03944	3	1459	BP	oxidation-reduction process
w_c.2	8	GO:0003857	0.003123	1	4	MF	3-hydroxyacyl-CoA dehydrogenase activity
w_c.2	8	GO:0004871	0.047243	1	78	MF	signal transducer activity
w_c.2	8	GO:0008883	0.001893	1	2	MF	glutamyl-tRNA reductase activity
w_c.2	8	GO:0016157	0.005597	1	8	MF	sucrose synthase activity
w_c.2	8	GO:0050661	0.02385	1	38	MF	NADP binding
w_c.2	9	GO:0006099	0.027294	1	15	BP	tricarboxylic acid cycle
w_c.2	9	GO:0015977	0.013796	1	7	BP	carbon fixation
w_c.2	9	GO:0019538	0.028899	1	16	BP	protein metabolic process
w_c.2	9	GO:0033014	0.013796	1	7	BP	tetrapyrrole biosynthetic process
w_c.2	9	GO:0004386	0.031342	2	176	MF	helicase activity
w_c.2	9	GO:0004527	0.035494	1	20	MF	exonuclease activity
w_c.2	9	GO:0005515	0.03037	1	3034	MF	protein binding
w_c.2	9	GO:0008237	0.045175	1	26	MF	metallopeptidase activity
w_c.2	9	GO:0008883	0.005285	1	2	MF	glutamyl-tRNA reductase activity
w_c.2	9	GO:0008964	0.008695	1	4	MF	phosphoenolpyruvate carboxylase activity
w_c.2	9	GO:0010277	1.6e-05	2	2	MF	chlorophyllide a oxygenase [overall] activity
w_c.2	9	GO:0016491	0.02883	4	786	MF	oxidoreductase activity
w_c.2	9	GO:0016851	0.005285	1	2	MF	magnesium chelatase activity
w_c.2	9	GO:0016884	0.035494	1	20	MF	carbon-nitrogen ligase activity, with glutamine as amido-N-donor
w_c.2	9	GO:0030151	0.0121	1	6	MF	molybdenum ion binding
w_c.2	9	GO:0051537	0.000528	2	19	MF	2 iron, 2 sulfur cluster binding
w_c.2	10	GO:0006355	0.000328	3	1150	BP	regulation of transcription, DNA-dependent
w_c.2	10	GO:0006468	0.018761	21	1159	BP	protein phosphorylation
w_c.2	10	GO:0000221	0.038566	1	2	CC	vacuolar proton-transporting V-type ATPase, V1 domain
w_c.2	10	GO:0005622	0.001046	2	895	CC	intracellular
w_c.2	10	GO:0000166	0.026474	1	444	MF	nucleotide binding
w_c.2	10	GO:0003676	0.003389	2	779	MF	nucleic acid binding
w_c.2	10	GO:0003677	0.000175	3	1212	MF	DNA binding
w_c.2	10	GO:0003700	0.005099	1	602	MF	sequence-specific DNA binding transcription factor activity
w_c.2	10	GO:0004672	0.018559	21	1157	MF	protein kinase activity
w_c.2	10	GO:0004713	0.01787	19	1010	MF	protein tyrosine kinase activity
w_c.2	10	GO:0005515	0.011808	26	3009	MF	protein binding
w_c.2	10	GO:0008270	0.007937	8	1368	MF	zinc ion binding
w_c.2	10	GO:0016616	0.041457	3	66	MF	oxidoreductase activity, acting on the CH-OH group of donors, NAD or NADP as acceptor
w_c.2	10	GO:0016747	0.033315	6	215	MF	transferase activity, transferring acyl groups other than amino-acyl groups
w_c.2	11	GO:0006435	0.026101	1	2	BP	threonyl-tRNA aminoacylation
w_c.2	11	GO:0009082	0.026101	1	2	BP	branched chain family amino acid biosynthetic process
w_c.2	11	GO:0009086	0.042441	1	4	BP	methionine biosynthetic process
w_c.2	11	GO:0016114	0.034285	1	3	BP	terpenoid biosynthetic process
w_c.2	11	GO:0018342	0.026101	1	2	BP	protein prenylation
w_c.2	11	GO:0055114	0.026287	6	1456	BP	oxidation-reduction process
w_c.2	11	GO:0005643	0.003409	2	9	CC	nuclear pore
w_c.2	11	GO:0016020	0.012419	4	1300	CC	membrane
w_c.2	11	GO:0016021	0.010339	1	795	CC	integral to membrane
w_c.2	11	GO:0003676	0.036196	2	779	MF	nucleic acid binding
w_c.2	11	GO:0003871	0.042441	1	4	MF	5-methyltetrahydropteroyltriglutamate-homocysteine S-methyltransferase activity
w_c.2	11	GO:0003984	0.018007	1	1	MF	acetolactate synthase activity
w_c.2	11	GO:0003998	0.018007	1	1	MF	acylphosphatase activity
w_c.2	11	GO:0004134	0.018007	1	1	MF	4-alpha-glucanotransferase activity
w_c.2	11	GO:0004556	0.042441	1	4	MF	alpha-amylase activity
w_c.2	11	GO:0004829	0.026101	1	2	MF	threonine-tRNA ligase activity
w_c.2	11	GO:0005515	2.7e-05	8	3027	MF	protein binding
w_c.2	11	GO:0005524	0.000263	6	2307	MF	ATP binding
w_c.2	11	GO:0008270	0.002855	3	1373	MF	zinc ion binding
w_c.2	11	GO:0008318	0.026101	1	2	MF	protein prenyltransferase activity
w_c.2	11	GO:0043546	0.026101	1	2	MF	molybdopterin cofactor binding
w_c.2	11	GO:0046429	0.018007	1	1	MF	4-hydroxy-3-methylbut-2-en-1-yl diphosphate synthase activity
w_c.2	12	GO:0009765	0	3	23	BP	photosynthesis, light harvesting
w_c.2	12	GO:0006073	0.021367	1	34	BP	cellular glucan metabolic process
w_c.2	12	GO:0015979	0.030409	1	49	BP	photosynthesis
w_c.2	12	GO:0016020	0.029989	3	1301	CC	membrane
w_c.2	12	GO:0048046	0.042046	1	69	CC	apoplast
w_c.2	12	GO:0009507	0.011103	1	17	CC	chloroplast
w_c.2	12	GO:0009523	0.020262	1	32	CC	photosystem II
w_c.2	12	GO:0016762	0.021367	1	34	MF	xyloglucan:xyloglucosyl transferase activity
w_c.2	13	GO:0051536	0.036153	1	39	MF	iron-sulfur cluster binding
w_c.2	15	GO:0006098	0.009488	1	8	BP	pentose-phosphate shunt
w_c.2	15	GO:0006434	0.003211	1	2	BP	seryl-tRNA aminoacylation
w_c.2	15	GO:0006811	0.034963	1	33	BP	ion transport
w_c.2	15	GO:0009186	0.003211	1	2	BP	deoxyribonucleoside diphosphate metabolic process
w_c.2	15	GO:0015996	0.0022	1	1	BP	chlorophyll catabolic process
w_c.2	15	GO:0004176	0.010485	1	9	MF	ATP-dependent peptidase activity
w_c.2	15	GO:0004616	0.009488	1	8	MF	phosphogluconate dehydrogenase (decarboxylating) activity
w_c.2	15	GO:0004748	0.009488	1	8	MF	ribonucleoside-diphosphate reductase activity
w_c.2	15	GO:0004828	0.003211	1	2	MF	serine-tRNA ligase activity
w_c.2	15	GO:0005216	0.033974	1	32	MF	ion channel activity
w_c.2	15	GO:0047746	0.0022	1	1	MF	chlorophyllase activity
w_c.2	16	GO:0006826	0.006975	1	3	BP	iron ion transport
w_c.2	16	GO:0006879	0.010401	1	5	BP	cellular iron ion homeostasis
w_c.2	16	GO:0015995	0.005285	1	2	BP	chlorophyll biosynthetic process
w_c.2	16	GO:0019288	0.005285	1	2	BP	isopentenyl diphosphate biosynthetic process, mevalonate-independent pathway
w_c.2	16	GO:0032313	0.033852	1	19	BP	regulation of Rab GTPase activity
w_c.2	16	GO:0033014	0.013796	1	7	BP	tetrapyrrole biosynthetic process
w_c.2	16	GO:0009507	0.030545	1	17	CC	chloroplast
w_c.2	16	GO:0005097	0.033852	1	19	MF	Rab GTPase activator activity
w_c.2	16	GO:0005515	0.03037	1	3034	MF	protein binding
w_c.2	16	GO:0008199	0.006975	1	3	MF	ferric iron binding
w_c.2	16	GO:0008237	0.045175	1	26	MF	metallopeptidase activity
w_c.2	16	GO:0016740	0.049996	1	29	MF	transferase activity
w_c.2	16	GO:0016765	0.023887	1	13	MF	transferase activity, transferring alkyl or aryl (other than methyl) groups
w_c.2	17	GO:0006367	0.043403	1	10	BP	transcription initiation from RNA polymerase II promoter
w_c.2	17	GO:0006427	0.008496	1	1	BP	histidyl-tRNA aminoacylation
w_c.2	17	GO:0051205	0.028104	1	6	BP	protein insertion into membrane
w_c.2	17	GO:0005673	0.008496	1	1	CC	transcription factor TFIIE complex
w_c.2	17	GO:0016602	0.031949	1	7	CC	CCAAT-binding factor complex
w_c.2	17	GO:0003995	0.043403	1	10	MF	acyl-CoA dehydrogenase activity
w_c.2	17	GO:0004356	0.039603	1	9	MF	glutamate-ammonia ligase activity
w_c.2	17	GO:0004821	0.008496	1	1	MF	histidine-tRNA ligase activity
w_c.2	17	GO:0005515	0.048729	7	3028	MF	protein binding
w_c.2	17	GO:0005524	0.004433	2	2311	MF	ATP binding
w_c.2	17	GO:0010277	0.016324	1	3	MF	chlorophyllide a oxygenase [overall] activity
w_c.2	19	GO:0015979	0.042148	1	49	BP	photosynthesis
w_c.2	19	GO:0009765	0.022291	1	25	BP	photosynthesis, light harvesting
w_c.2	19	GO:0051276	0.003503	1	3	BP	chromosome organization
w_c.2	19	GO:0009522	0.008649	1	9	CC	photosystem I
w_c.2	19	GO:0009538	0.005232	1	5	CC	photosystem I reaction center
w_c.2	19	GO:0005694	0.013821	1	15	CC	chromosome
w_c.2	20	GO:0015979	0.006477	1	49	BP	photosynthesis
w_c.2	20	GO:0009522	0.001294	1	9	CC	photosystem I
w_c.2	20	GO:0009538	0.000779	1	5	CC	photosystem I reaction center
w_c.2	21	GO:0008152	0.034695	4	872	BP	metabolic process
w_c.2	21	GO:0009765	0.042112	1	25	BP	photosynthesis, light harvesting
w_c.2	21	GO:0042026	0.019873	1	11	BP	protein refolding
w_c.2	21	GO:0044267	0.046745	1	28	BP	cellular protein metabolic process
w_c.2	21	GO:0009522	0.016583	1	9	CC	photosystem I
w_c.2	21	GO:0009538	0.010031	1	5	CC	photosystem I reaction center
w_c.2	21	GO:0033177	0.023069	1	13	CC	proton-transporting two-sector ATPase complex, proton-transporting domain
w_c.2	21	GO:0008898	0.005097	1	2	MF	homocysteine S-methyltransferase activity
w_c.2	21	GO:0015078	0.042112	1	25	MF	hydrogen ion transmembrane transporter activity
w_c.2	21	GO:0016630	0.003495	1	1	MF	protochlorophyllide reductase activity
w_c.2	22	GO:0009058	0.042469	3	165	BP	biosynthetic process
w_c.2	22	GO:0009073	0.041774	1	7	BP	aromatic amino acid family biosynthetic process
w_c.2	22	GO:0009094	0.031681	1	5	BP	L-phenylalanine biosynthetic process
w_c.2	22	GO:0009269	0.041774	1	7	BP	response to desiccation
w_c.2	22	GO:0005886	0.031681	1	5	CC	plasma membrane
w_c.2	22	GO:0048046	0.044081	2	68	CC	apoplast
w_c.2	22	GO:0003677	0.04139	2	1213	MF	DNA binding
w_c.2	22	GO:0003840	0.01625	1	2	MF	gamma-glutamyltransferase activity
w_c.2	22	GO:0003849	0.01625	1	2	MF	3-deoxy-7-phosphoheptulonate synthase activity
w_c.2	22	GO:0003878	0.026605	1	4	MF	ATP citrate synthase activity
w_c.2	22	GO:0003993	0.046886	1	8	MF	acid phosphatase activity
w_c.2	22	GO:0004017	0.01625	1	2	MF	adenylate kinase activity
w_c.2	22	GO:0004449	0.03675	1	6	MF	isocitrate dehydrogenase (NAD+) activity
w_c.2	22	GO:0004488	0.021388	1	3	MF	methylenetetrahydrofolate dehydrogenase (NADP+) activity
w_c.2	22	GO:0004664	0.031681	1	5	MF	prephenate dehydratase activity
w_c.2	22	GO:0004775	0.026605	1	4	MF	succinate-CoA ligase (ADP-forming) activity
w_c.2	22	GO:0005507	0.018638	3	115	MF	copper ion binding
w_c.2	22	GO:0005515	0.00096	5	3030	MF	protein binding
w_c.2	22	GO:0005524	0.005363	4	2309	MF	ATP binding
w_c.2	22	GO:0008168	0.030542	3	142	MF	methyltransferase activity
w_c.2	22	GO:0008171	0.006825	2	23	MF	O-methyltransferase activity
w_c.2	22	GO:0016616	0.043173	2	67	MF	oxidoreductase activity, acting on the CH-OH group of donors, NAD or NADP as acceptor
w_c.2	22	GO:0016757	0.035913	2	60	MF	transferase activity, transferring glycosyl groups
w_c.2	22	GO:0016841	8e-05	2	1	MF	ammonia-lyase activity
w_c.2	22	GO:0030060	0.031681	1	5	MF	L-malate dehydrogenase activity
w_c.2	23	GO:0009607	0.041707	1	32	BP	response to biotic stimulus
w_c.2	23	GO:0032313	0.02559	1	19	BP	regulation of Rab GTPase activity
w_c.2	23	GO:0005097	0.02559	1	19	MF	Rab GTPase activator activity
w_c.2	24	GO:0005975	0.022154	4	469	BP	carbohydrate metabolic process
w_c.2	24	GO:0006352	0.00702	4	35	BP	transcription initiation, DNA-dependent
w_c.2	24	GO:0006355	0.023483	16	1137	BP	regulation of transcription, DNA-dependent
w_c.2	24	GO:0006402	0.045196	1	1	BP	mRNA catabolic process
w_c.2	24	GO:0006412	0.008534	1	325	BP	translation
w_c.2	24	GO:0006468	0.001016	11	1169	BP	protein phosphorylation
w_c.2	24	GO:0006508	0.04067	5	475	BP	proteolysis
w_c.2	24	GO:0006810	0.040385	3	360	BP	transport
w_c.2	24	GO:0008152	0.007702	9	867	BP	metabolic process
w_c.2	24	GO:0030163	0.045196	1	1	BP	protein catabolic process
w_c.2	24	GO:0046938	0.045196	1	1	BP	phytochelatin biosynthetic process
w_c.2	24	GO:0055114	0.001495	16	1446	BP	oxidation-reduction process
w_c.2	24	GO:0005622	0.000138	5	892	CC	intracellular
w_c.2	24	GO:0005634	0.004227	6	728	CC	nucleus
w_c.2	24	GO:0005840	0.00966	1	318	CC	ribosome
w_c.2	24	GO:0016020	0.002155	14	1290	CC	membrane
w_c.2	24	GO:0016021	0.029382	10	786	CC	integral to membrane
w_c.2	24	GO:0016602	0.010737	2	6	CC	CCAAT-binding factor complex
w_c.2	24	GO:0000156	0.047915	4	70	MF	two-component response regulator activity
w_c.2	24	GO:0000213	0.045196	1	1	MF	tRNA-intron endonuclease activity
w_c.2	24	GO:0003677	0.005321	14	1201	MF	DNA binding
w_c.2	24	GO:0003700	0.036947	7	596	MF	sequence-specific DNA binding transcription factor activity
w_c.2	24	GO:0003735	0.007647	1	331	MF	structural constituent of ribosome
w_c.2	24	GO:0003824	0.009496	7	726	MF	catalytic activity
w_c.2	24	GO:0004140	0.045196	1	1	MF	dephospho-CoA kinase activity
w_c.2	24	GO:0004386	0.019174	8	170	MF	helicase activity
w_c.2	24	GO:0004553	0.041494	2	297	MF	hydrolase activity, hydrolyzing O-glycosyl compounds
w_c.2	24	GO:0004560	0.045196	1	1	MF	alpha-L-fucosidase activity
w_c.2	24	GO:0004654	0.045196	1	1	MF	polyribonucleotide nucleotidyltransferase activity
w_c.2	24	GO:0004672	0.001041	11	1167	MF	protein kinase activity
w_c.2	24	GO:0004674	0.017283	8	731	MF	protein serine/threonine kinase activity
w_c.2	24	GO:0004713	0.001277	9	1020	MF	protein tyrosine kinase activity
w_c.2	24	GO:0005215	0.01475	1	294	MF	transporter activity
w_c.2	24	GO:0005506	0.010956	3	456	MF	iron ion binding
w_c.2	24	GO:0005515	9e-06	34	3001	MF	protein binding
w_c.2	24	GO:0005524	0.009422	35	2278	MF	ATP binding
w_c.2	24	GO:0005525	0.035969	1	242	MF	GTP binding
w_c.2	24	GO:0008026	0.015016	7	129	MF	ATP-dependent helicase activity
w_c.2	24	GO:0008081	0.010737	2	6	MF	phosphoric diester hydrolase activity
w_c.2	24	GO:0008270	0.000201	12	1364	MF	zinc ion binding
w_c.2	24	GO:0008440	0.045196	1	1	MF	inositol-1,4,5-trisphosphate 3-kinase activity
w_c.2	24	GO:0009055	0.000734	2	547	MF	electron carrier activity
w_c.2	24	GO:0015299	0.049504	3	41	MF	solute:hydrogen antiporter activity
w_c.2	24	GO:0016491	0.046567	11	779	MF	oxidoreductase activity
w_c.2	24	GO:0016705	0.006168	1	343	MF	oxidoreductase activity, acting on paired donors, with incorporation or reduction of molecular oxygen
w_c.2	24	GO:0016756	0.045196	1	1	MF	glutathione gamma-glutamylcysteinyltransferase activity
w_c.2	24	GO:0016891	0.001218	3	8	MF	endoribonuclease activity, producing 5'-phosphomonoesters
w_c.2	24	GO:0016987	0.010737	2	6	MF	sigma factor activity
w_c.2	24	GO:0020037	0.000732	1	458	MF	heme binding
w_c.2	24	GO:0043565	0.018692	2	351	MF	sequence-specific DNA binding
w_c.2	25	GO:0001510	0.013582	1	4	BP	RNA methylation
w_c.2	25	GO:0006139	0.005047	2	40	BP	nucleobase-containing compound metabolic process
w_c.2	25	GO:0006265	0.029331	1	10	BP	DNA topological change
w_c.2	25	GO:0006364	0.044653	1	16	BP	rRNA processing
w_c.2	25	GO:0032259	0.026689	1	9	BP	methylation
w_c.2	25	GO:0005694	0.042139	1	15	CC	chromosome
w_c.2	25	GO:0003712	0.042139	1	15	MF	transcription cofactor activity
w_c.2	25	GO:0003917	0.013582	1	4	MF	DNA topoisomerase type I activity
w_c.2	25	GO:0003918	0.021495	1	7	MF	DNA topoisomerase (ATP-hydrolyzing) activity
w_c.2	25	GO:0004402	0.026689	1	9	MF	histone acetyltransferase activity
w_c.2	25	GO:0005525	0.002909	4	239	MF	GTP binding
w_c.2	25	GO:0008408	0.031959	1	11	MF	3'-5' exonuclease activity
w_c.2	25	GO:0016773	0.010865	2	61	MF	phosphotransferase activity, alcohol group as acceptor
w_c.2	26	GO:0009765	0.000298	2	24	BP	photosynthesis, light harvesting
w_c.2	26	GO:0042549	0.004244	1	3	BP	photosystem II stabilization
w_c.2	26	GO:0009523	0.033974	1	32	CC	photosystem II
w_c.2	26	GO:0009654	0.024816	1	23	CC	oxygen evolving complex
w_c.2	26	GO:0019898	0.020808	1	19	CC	extrinsic to membrane
w_c.2	26	GO:0016620	1e-06	3	19	MF	oxidoreductase activity, acting on the aldehyde or oxo group of donors, NAD or NADP as acceptor
w_c.3	1	GO:0005975	0.04564	3	470	BP	carbohydrate metabolic process
w_c.3	1	GO:0006796	0.017685	1	8	BP	phosphate-containing compound metabolic process
w_c.3	1	GO:0009094	0.011843	1	5	BP	L-phenylalanine biosynthetic process
w_c.3	1	GO:0004427	0.027174	1	13	MF	inorganic diphosphatase activity
w_c.3	1	GO:0004618	0.006022	1	2	MF	phosphoglycerate kinase activity
w_c.3	1	GO:0004645	0.007951	1	3	MF	phosphorylase activity
w_c.3	1	GO:0004664	0.011843	1	5	MF	prephenate dehydratase activity
w_c.3	1	GO:0005484	0.025274	1	12	MF	SNAP receptor activity
w_c.3	2	GO:0005978	0.004355	1	6	BP	glycogen biosynthetic process
w_c.3	2	GO:0005506	0.026249	2	457	MF	iron ion binding
w_c.3	2	GO:0009055	0.036074	2	547	MF	electron carrier activity
w_c.3	2	GO:0016705	0.015576	2	342	MF	oxidoreductase activity, acting on paired donors, with incorporation or reduction of molecular oxygen
w_c.3	2	GO:0020037	0.026249	2	457	MF	heme binding
w_c.3	2	GO:0016779	0.02676	1	43	MF	nucleotidyltransferase activity
w_c.3	3	GO:0006355	0.001839	6	1147	BP	regulation of transcription, DNA-dependent
w_c.3	3	GO:0006433	0.045059	1	2	BP	prolyl-tRNA aminoacylation
w_c.3	3	GO:0006468	0.014742	9	1171	BP	protein phosphorylation
w_c.3	3	GO:0006508	0.026322	2	478	BP	proteolysis
w_c.3	3	GO:0006952	0.028907	6	175	BP	defense response
w_c.3	3	GO:0008152	0.009568	5	871	BP	metabolic process
w_c.3	3	GO:0055114	0.003487	10	1452	BP	oxidation-reduction process
w_c.3	3	GO:0005622	0.007934	5	892	CC	intracellular
w_c.3	3	GO:0005634	0.005457	3	731	CC	nucleus
w_c.3	3	GO:0003676	0.009457	4	777	MF	nucleic acid binding
w_c.3	3	GO:0003677	0.001009	6	1209	MF	DNA binding
w_c.3	3	GO:0003700	0.044011	4	599	MF	sequence-specific DNA binding transcription factor activity
w_c.3	3	GO:0003950	0.008213	2	8	MF	NAD+ ADP-ribosyltransferase activity
w_c.3	3	GO:0004134	0.031256	1	1	MF	4-alpha-glucanotransferase activity
w_c.3	3	GO:0004672	0.014907	9	1169	MF	protein kinase activity
w_c.3	3	GO:0004674	0.029859	5	734	MF	protein serine/threonine kinase activity
w_c.3	3	GO:0004713	0.023173	8	1021	MF	protein tyrosine kinase activity
w_c.3	3	GO:0004827	0.045059	1	2	MF	proline-tRNA ligase activity
w_c.3	3	GO:0004930	0.031256	1	1	MF	G-protein coupled receptor activity
w_c.3	3	GO:0005506	0.032548	2	457	MF	iron ion binding
w_c.3	3	GO:0005515	0.001594	27	3008	MF	protein binding
w_c.3	3	GO:0005524	0.003897	20	2293	MF	ATP binding
w_c.3	3	GO:0008270	0.012421	11	1365	MF	zinc ion binding
w_c.3	3	GO:0009055	0.012721	2	547	MF	electron carrier activity
w_c.3	3	GO:0016491	0.037875	6	784	MF	oxidoreductase activity
w_c.3	3	GO:0016705	0.040109	1	343	MF	oxidoreductase activity, acting on paired donors, with incorporation or reduction of molecular oxygen
w_c.3	3	GO:0043531	0.014178	6	144	MF	ADP binding
w_c.3	4	GO:0006597	0.010819	1	6	BP	spermine biosynthetic process
w_c.3	4	GO:0008295	0.010819	1	6	BP	spermidine biosynthetic process
w_c.3	4	GO:0009507	0.027362	1	17	CC	chloroplast
w_c.3	4	GO:0004014	0.010819	1	6	MF	adenosylmethionine decarboxylase activity
w_c.3	4	GO:0016717	0.00038	2	18	MF	oxidoreductase activity, acting on paired donors, with oxidation of a pair of donors resulting in the reduction of molecular oxygen to two molecules of water
w_c.3	4	GO:0016853	0.028841	1	18	MF	isomerase activity
w_c.3	5	GO:0009607	0.014285	1	32	BP	response to biotic stimulus
w_c.3	6	GO:0006355	0.034984	13	1140	BP	regulation of transcription, DNA-dependent
w_c.3	6	GO:0006468	0.006176	2	1178	BP	protein phosphorylation
w_c.3	6	GO:0008299	0.009047	2	18	BP	isoprenoid biosynthetic process
w_c.3	6	GO:0042823	0.04565	1	5	BP	pyridoxal phosphate biosynthetic process
w_c.3	6	GO:0016020	0.023938	4	1300	CC	membrane
w_c.3	6	GO:0003676	0.019606	1	780	MF	nucleic acid binding
w_c.3	6	GO:0004645	0.031023	1	3	MF	phosphorylase activity
w_c.3	6	GO:0004672	0.006254	2	1176	MF	protein kinase activity
w_c.3	6	GO:0004674	0.025451	1	738	MF	protein serine/threonine kinase activity
w_c.3	6	GO:0004713	0.014853	2	1027	MF	protein tyrosine kinase activity
w_c.3	6	GO:0005515	5.1e-05	7	3028	MF	protein binding
w_c.3	6	GO:0005524	0.000324	5	2308	MF	ATP binding
w_c.3	6	GO:0008883	0.023574	1	2	MF	glutamyl-tRNA reductase activity
w_c.3	7	GO:0006364	0.030961	1	16	BP	rRNA processing
w_c.3	7	GO:0009765	0.046624	1	25	BP	photosynthesis, light harvesting
w_c.3	7	GO:0033014	0.014807	1	7	BP	tetrapyrrole biosynthetic process
w_c.3	7	GO:0008883	0.00567	1	2	MF	glutamyl-tRNA reductase activity
w_c.3	8	GO:0006013	0.018968	1	3	BP	mannose metabolic process
w_c.3	8	GO:0006535	0.045909	1	9	BP	cysteine biosynthetic process from serine
w_c.3	8	GO:0006779	0.018968	1	3	BP	porphyrin-containing compound biosynthetic process
w_c.3	8	GO:0005673	0.009907	1	1	CC	transcription factor TFIIE complex
w_c.3	8	GO:0016602	0.0371	1	7	CC	CCAAT-binding factor complex
w_c.3	8	GO:0005515	0.018501	7	3028	MF	protein binding
w_c.3	8	GO:0005524	0.013428	4	2309	MF	ATP binding
w_c.3	8	GO:0008474	0.018968	1	3	MF	palmitoyl-(protein) hydrolase activity
w_c.3	8	GO:0015923	0.018968	1	3	MF	mannosidase activity
w_c.3	9	GO:0015979	0.036251	1	49	BP	photosynthesis
w_c.3	9	GO:0009522	0.007423	1	9	CC	photosystem I
w_c.3	9	GO:0009538	0.00448	1	5	CC	photosystem I reaction center
w_c.3	9	GO:0004197	0.021271	1	28	MF	cysteine-type endopeptidase activity
w_c.3	9	GO:0005215	0.016578	2	293	MF	transporter activity
w_c.3	10	GO:0009228	0.000779	1	5	BP	thiamine biosynthetic process
w_c.3	11	GO:0006099	0.014771	1	15	BP	tricarboxylic acid cycle
w_c.3	11	GO:0015977	0.007434	1	7	BP	carbon fixation
w_c.3	11	GO:0008964	0.004676	1	4	MF	phosphoenolpyruvate carboxylase activity
w_c.3	12	GO:0006952	0.032135	2	179	BP	defense response
w_c.3	12	GO:0015936	0.005285	1	2	BP	coenzyme A metabolic process
w_c.3	12	GO:0019288	0.005285	1	2	BP	isopentenyl diphosphate biosynthetic process, mevalonate-independent pathway
w_c.3	12	GO:0055114	0.019235	6	1456	BP	oxidation-reduction process
w_c.3	12	GO:0031012	0.027294	1	15	CC	extracellular matrix
w_c.3	12	GO:0003712	0.027294	1	15	MF	transcription cofactor activity
w_c.3	12	GO:0004402	0.017157	1	9	MF	histone acetyltransferase activity
w_c.3	12	GO:0004420	0.005285	1	2	MF	hydroxymethylglutaryl-CoA reductase (NADPH) activity
w_c.3	12	GO:0005515	0.03037	1	3034	MF	protein binding
w_c.3	12	GO:0008237	0.045175	1	26	MF	metallopeptidase activity
w_c.3	12	GO:0016717	0.033852	1	19	MF	oxidoreductase activity, acting on paired donors, with oxidation of a pair of donors resulting in the reduction of molecular oxygen to two molecules of water
w_c.3	13	GO:0006869	0.03367	1	30	BP	lipid transport
w_c.3	13	GO:0009072	0.005604	1	4	BP	aromatic amino acid family metabolic process
w_c.3	13	GO:0004743	0.020927	1	18	MF	pyruvate kinase activity
w_c.3	13	GO:0008289	0.034732	1	31	MF	lipid binding
w_c.3	13	GO:0030955	0.020927	1	18	MF	potassium ion binding
w_c.3	14	GO:0045454	0.006475	2	140	BP	cell redox homeostasis
w_c.3	14	GO:0015991	0.033551	1	36	BP	ATP hydrolysis coupled proton transport
w_c.3	14	GO:0033178	0.014771	1	15	CC	proton-transporting two-sector ATPase complex, catalytic domain
w_c.3	14	GO:0015035	0.004331	2	113	MF	protein disulfide oxidoreductase activity
w_c.3	14	GO:0046961	0.021109	1	22	MF	proton-transporting ATPase activity, rotational mechanism
w_c.3	15	GO:0019752	0.029383	1	22	BP	carboxylic acid metabolic process
w_c.3	15	GO:0000036	0.015513	1	11	MF	acyl carrier activity
w_c.3	15	GO:0003700	0.029916	3	600	MF	sequence-specific DNA binding transcription factor activity
w_c.3	15	GO:0004091	0.015513	1	11	MF	carboxylesterase activity
w_c.3	15	GO:0004869	0.014223	1	10	MF	cysteine-type endopeptidase inhibitor activity
w_c.3	15	GO:0016620	0.028079	1	21	MF	oxidoreductase activity, acting on the aldehyde or oxo group of donors, NAD or NADP as acceptor
w_c.3	15	GO:0016831	0.031811	1	24	MF	carboxy-lyase activity
w_c.3	15	GO:0016844	0.016776	1	12	MF	strictosidine synthase activity
w_c.3	15	GO:0031177	0.012933	1	9	MF	phosphopantetheine binding
w_c.3	15	GO:0048037	0.034288	1	26	MF	cofactor binding
w_c.3	16	GO:0009089	0.027925	1	8	BP	lysine biosynthetic process via diaminopimelate
w_c.3	16	GO:0015996	0.006571	1	1	BP	chlorophyll catabolic process
w_c.3	16	GO:0046373	0.009576	1	2	BP	L-arabinose metabolic process
w_c.3	16	GO:0009522	0.030859	1	9	CC	photosystem I
w_c.3	16	GO:0042651	0.015712	1	4	CC	thylakoid membrane
w_c.3	16	GO:0004553	0.046778	3	296	MF	hydrolase activity, hydrolyzing O-glycosyl compounds
w_c.3	16	GO:0005515	0.01177	3	3032	MF	protein binding
w_c.3	16	GO:0005524	0.006029	1	2312	MF	ATP binding
w_c.3	16	GO:0010285	0.015712	1	4	MF	L,L-diaminopimelate aminotransferase activity
w_c.3	16	GO:0046556	0.009576	1	2	MF	alpha-N-arabinofuranosidase activity
w_c.3	16	GO:0047746	0.006571	1	1	MF	chlorophyllase activity
w_c.3	17	GO:0016272	0.007434	1	7	CC	prefoldin complex
w_c.3	17	GO:0004221	0.035318	1	38	MF	ubiquitin thiolesterase activity
w_c.3	17	GO:0008171	0.022919	1	24	MF	O-methyltransferase activity
w_c.3	17	GO:0051087	0.000122	2	17	MF	chaperone binding
w_c.3	18	GO:0000272	0.019608	1	7	BP	polysaccharide catabolic process
w_c.3	18	GO:0006073	0.002947	2	33	BP	cellular glucan metabolic process
w_c.3	18	GO:0009607	0.00263	2	31	BP	response to biotic stimulus
w_c.3	18	GO:0045226	0.009943	1	3	BP	extracellular polysaccharide biosynthetic process
w_c.3	18	GO:0005618	0.041116	2	144	CC	cell wall
w_c.3	18	GO:0016272	0.019608	1	7	CC	prefoldin complex
w_c.3	18	GO:0019773	0.031472	1	12	CC	proteasome core complex, alpha-subunit complex
w_c.3	18	GO:0048046	0.011081	2	68	CC	apoplast
w_c.3	18	GO:0003924	0.04316	2	148	MF	GTPase activity
w_c.3	18	GO:0004175	0.049977	1	20	MF	endopeptidase activity
w_c.3	18	GO:0004332	0.022062	1	8	MF	fructose-bisphosphate aldolase activity
w_c.3	18	GO:0005524	0.022554	1	2312	MF	ATP binding
w_c.3	18	GO:0008831	0.009943	1	3	MF	dTDP-4-dehydrorhamnose reductase activity
w_c.3	18	GO:0016161	0.019608	1	7	MF	beta-amylase activity
w_c.3	18	GO:0016762	0.002947	2	33	MF	xyloglucan:xyloglucosyl transferase activity
w_c.3	18	GO:0051082	0.039216	2	140	MF	unfolded protein binding
w_c.3	19	GO:0005975	0.011712	9	464	BP	carbohydrate metabolic process
w_c.3	19	GO:0006013	0.035655	1	3	BP	mannose metabolic process
w_c.3	19	GO:0006308	0.044139	1	4	BP	DNA catabolic process
w_c.3	19	GO:0006355	0.042702	5	1148	BP	regulation of transcription, DNA-dependent
w_c.3	19	GO:0006468	0.018441	4	1176	BP	protein phosphorylation
w_c.3	19	GO:0006857	0.006762	4	89	BP	oligopeptide transport
w_c.3	19	GO:0007205	0.007748	2	14	BP	activation of protein kinase C activity by G-protein coupled receptor protein signaling pathway
w_c.3	19	GO:0009168	0.035655	1	3	BP	purine ribonucleoside monophosphate biosynthetic process
w_c.3	19	GO:0018342	0.027174	1	2	BP	protein prenylation
w_c.3	19	GO:0019318	0.035655	1	3	BP	hexose metabolic process
w_c.3	19	GO:0055114	0.000253	2	1460	BP	oxidation-reduction process
w_c.3	19	GO:0005622	0.003795	1	896	CC	intracellular
w_c.3	19	GO:0005634	0.03969	2	732	CC	nucleus
w_c.3	19	GO:0003676	0.009121	1	780	MF	nucleic acid binding
w_c.3	19	GO:0003677	0.01525	4	1211	MF	DNA binding
w_c.3	19	GO:0003824	0.039937	2	731	MF	catalytic activity
w_c.3	19	GO:0004000	0.018737	1	1	MF	adenosine deaminase activity
w_c.3	19	GO:0004134	0.018737	1	1	MF	4-alpha-glucanotransferase activity
w_c.3	19	GO:0004143	0.007748	2	14	MF	diacylglycerol kinase activity
w_c.3	19	GO:0004370	0.018737	1	1	MF	glycerol kinase activity
w_c.3	19	GO:0004559	0.018737	1	1	MF	alpha-mannosidase activity
w_c.3	19	GO:0004672	0.018648	4	1174	MF	protein kinase activity
w_c.3	19	GO:0004713	0.017768	3	1026	MF	protein tyrosine kinase activity
w_c.3	19	GO:0005515	0.001521	13	3022	MF	protein binding
w_c.3	19	GO:0005524	0.000446	7	2306	MF	ATP binding
w_c.3	19	GO:0008270	0.014777	5	1371	MF	zinc ion binding
w_c.3	19	GO:0008318	0.027174	1	2	MF	protein prenyltransferase activity
w_c.3	19	GO:0015923	0.035655	1	3	MF	mannosidase activity
w_c.3	19	GO:0016491	0.02836	2	788	MF	oxidoreductase activity
w_c.3	19	GO:0016901	0.018737	1	1	MF	oxidoreductase activity, acting on the CH-OH group of donors, quinone or similar compound as acceptor
w_c.3	19	GO:0019239	0.035655	1	3	MF	deaminase activity
w_c.3	20	GO:0009765	0.000262	2	24	BP	photosynthesis, light harvesting
w_c.3	20	GO:0004197	0.028242	1	28	MF	cysteine-type endopeptidase activity
w_c.3	21	GO:0008299	0.032688	1	19	BP	isoprenoid biosynthetic process
w_c.3	21	GO:0009507	0.029477	1	17	CC	chloroplast
w_c.3	21	GO:0016831	0.040576	1	24	MF	carboxy-lyase activity
w_c.3	21	GO:0016853	0.000401	2	17	MF	isomerase activity
w_c.3	21	GO:0019904	0.024721	1	14	MF	protein domain specific binding
w_c.3	21	GO:0030976	0.018193	1	10	MF	thiamine pyrophosphate binding
w_c.3	22	GO:0006012	0.016997	1	11	BP	galactose metabolic process
w_c.3	22	GO:0006221	0.008578	1	5	BP	pyrimidine nucleotide biosynthetic process
w_c.3	22	GO:0016310	0.029374	1	20	BP	phosphorylation
w_c.3	22	GO:0018106	0.036158	1	25	BP	peptidyl-histidine phosphorylation
w_c.3	22	GO:0000155	0.04686	1	33	MF	two-component sensor activity
w_c.3	22	GO:0003883	0.005746	1	3	MF	CTP synthase activity
w_c.3	22	GO:0003913	0.011375	1	7	MF	DNA photolyase activity
w_c.3	22	GO:0003978	0.012809	1	8	MF	UDP-glucose 4-epimerase activity
w_c.3	22	GO:0004673	0.036158	1	25	MF	protein histidine kinase activity
w_c.3	22	GO:0005506	0.019404	3	456	MF	iron ion binding
w_c.3	22	GO:0016165	0.019729	1	13	MF	lipoxygenase activity
w_c.3	22	GO:0016620	0.030694	1	21	MF	oxidoreductase activity, acting on the aldehyde or oxo group of donors, NAD or NADP as acceptor
w_c.3	22	GO:0016702	0.023891	1	16	MF	oxidoreductase activity, acting on single donors with incorporation of molecular oxygen, incorporation of two atoms of oxygen
w_c.3	22	GO:0016772	0.042664	1	30	MF	transferase activity, transferring phosphorus-containing groups
w_c.3	22	GO:0016887	0.024311	2	186	MF	ATPase activity
w_c.3	22	GO:0051087	0.026612	1	18	MF	chaperone binding

## Sheet: Association - S26
Comparison	Cluster ID	Gene ID	GO Term	Type	Dscription
w_c.1	1	LOC108211283	GO:0004869	MF	cysteine-type endopeptidase inhibitor activity
w_c.1	1	LOC108210653	GO:0005634	CC	nucleus
w_c.1	1	LOC108210653	GO:0006355	BP	regulation of transcription, DNA-dependent
w_c.1	1	LOC108210653	GO:0046983	MF	protein dimerization activity
w_c.1	1	LOC108224909	GO:0009055	MF	electron carrier activity
w_c.1	1	LOC108224909	GO:0015035	MF	protein disulfide oxidoreductase activity
w_c.1	1	LOC108224909	GO:0045454	BP	cell redox homeostasis
w_c.1	1	LOC108194119	GO:0006952	BP	defense response
w_c.1	1	LOC108194119	GO:0009607	BP	response to biotic stimulus
w_c.1	1	LOC108200128	GO:0003824	MF	catalytic activity
w_c.1	1	LOC108200128	GO:0008762	MF	UDP-N-acetylmuramate dehydrogenase activity
w_c.1	1	LOC108200128	GO:0016491	MF	oxidoreductase activity
w_c.1	1	LOC108200128	GO:0016614	MF	oxidoreductase activity, acting on CH-OH group of donors
w_c.1	1	LOC108200128	GO:0050660	MF	flavin adenine dinucleotide binding
w_c.1	1	LOC108200128	GO:0055114	BP	oxidation-reduction process
w_c.1	1	LOC108201108	GO:0005507	MF	copper ion binding
w_c.1	1	LOC108201108	GO:0009055	MF	electron carrier activity
w_c.1	1	LOC108202811	GO:0005576	CC	extracellular region
w_c.1	1	LOC108202811	GO:0009664	BP	plant-type cell wall organization
w_c.1	2	LOC108204892	GO:0004867	MF	serine-type endopeptidase inhibitor activity
w_c.1	2	LOC108206060	GO:0016491	MF	oxidoreductase activity
w_c.1	2	LOC108206060	GO:0016706	MF	oxidoreductase activity, acting on paired donors, with incorporation or reduction of molecular oxygen, 2-oxoglutarate as one donor, and incorporation of one atom each of oxygen into both donors
w_c.1	2	LOC108206060	GO:0055114	BP	oxidation-reduction process
w_c.1	2	LOC108206291	GO:0005215	MF	transporter activity
w_c.1	2	LOC108206291	GO:0006857	BP	oligopeptide transport
w_c.1	2	LOC108206291	GO:0016020	CC	membrane
w_c.1	2	LOC108210226	GO:0009058	BP	biosynthetic process
w_c.1	2	LOC108210226	GO:0016769	MF	transferase activity, transferring nitrogenous groups
w_c.1	2	LOC108210226	GO:0016847	MF	1-aminocyclopropane-1-carboxylate synthase activity
w_c.1	2	LOC108210226	GO:0030170	MF	pyridoxal phosphate binding
w_c.1	2	LOC108210226	GO:0042218	BP	1-aminocyclopropane-1-carboxylate biosynthetic process
w_c.1	2	LOC108206906	GO:0005515	MF	protein binding
w_c.1	2	LOC108213112	GO:0004553	MF	hydrolase activity, hydrolyzing O-glycosyl compounds
w_c.1	2	LOC108213112	GO:0005975	BP	carbohydrate metabolic process
w_c.1	2	LOC108210811	GO:0008152	BP	metabolic process
w_c.1	2	LOC108210811	GO:0016491	MF	oxidoreductase activity
w_c.1	2	LOC108210571	GO:0008152	BP	metabolic process
w_c.1	2	LOC108210571	GO:0016491	MF	oxidoreductase activity
w_c.1	2	LOC108215101	GO:0006071	BP	glycerol metabolic process
w_c.1	2	LOC108215101	GO:0008889	MF	glycerophosphodiester phosphodiesterase activity
w_c.1	2	LOC108211126	GO:0016209	MF	antioxidant activity
w_c.1	2	LOC108211126	GO:0016491	MF	oxidoreductase activity
w_c.1	2	LOC108211126	GO:0055114	BP	oxidation-reduction process
w_c.1	2	LOC108210859	GO:0003676	MF	nucleic acid binding
w_c.1	2	LOC108211052	GO:0003779	MF	actin binding
w_c.1	2	LOC108211052	GO:0005622	CC	intracellular
w_c.1	2	LOC108219547	GO:0004197	MF	cysteine-type endopeptidase activity
w_c.1	2	LOC108219547	GO:0006508	BP	proteolysis
w_c.1	2	LOC108219547	GO:0008234	MF	cysteine-type peptidase activity
w_c.1	2	LOC108215991	GO:0003824	MF	catalytic activity
w_c.1	2	LOC108215991	GO:0008152	BP	metabolic process
w_c.1	2	LOC108220220	GO:0005509	MF	calcium ion binding
w_c.1	2	LOC108223975	GO:0016020	CC	membrane
w_c.1	2	LOC108222801	GO:0009507	CC	chloroplast
w_c.1	2	LOC108222801	GO:0009523	CC	photosystem II
w_c.1	2	LOC108222801	GO:0015979	BP	photosynthesis
w_c.1	2	LOC108219977	GO:0045735	MF	nutrient reservoir activity
w_c.1	2	LOC108224375	GO:0009058	BP	biosynthetic process
w_c.1	2	LOC108224375	GO:0016844	MF	strictosidine synthase activity
w_c.1	2	LOC108224784	GO:0005215	MF	transporter activity
w_c.1	2	LOC108224784	GO:0006857	BP	oligopeptide transport
w_c.1	2	LOC108224784	GO:0016020	CC	membrane
w_c.1	2	LOC108228078	GO:0009058	BP	biosynthetic process
w_c.1	2	LOC108228078	GO:0016844	MF	strictosidine synthase activity
w_c.1	2	LOC108224600	GO:0004106	MF	chorismate mutase activity
w_c.1	2	LOC108224600	GO:0009073	BP	aromatic amino acid family biosynthetic process
w_c.1	2	LOC108193281	GO:0005506	MF	iron ion binding
w_c.1	2	LOC108193281	GO:0009055	MF	electron carrier activity
w_c.1	2	LOC108193281	GO:0016705	MF	oxidoreductase activity, acting on paired donors, with incorporation or reduction of molecular oxygen
w_c.1	2	LOC108193281	GO:0020037	MF	heme binding
w_c.1	2	LOC108193281	GO:0055114	BP	oxidation-reduction process
w_c.1	2	LOC108199484	GO:0016491	MF	oxidoreductase activity
w_c.1	2	LOC108199484	GO:0055114	BP	oxidation-reduction process
w_c.1	2	LOC108198377	GO:0005622	CC	intracellular
w_c.1	2	LOC108198377	GO:0008270	MF	zinc ion binding
w_c.1	2	LOC108197250	GO:0005515	MF	protein binding
w_c.1	2	LOC108200426	GO:0008152	BP	metabolic process
w_c.1	2	LOC108200426	GO:0016758	MF	transferase activity, transferring hexosyl groups
w_c.1	2	LOC108192423	GO:0003779	MF	actin binding
w_c.1	2	LOC108192423	GO:0007010	BP	cytoskeleton organization
w_c.1	2	LOC108192423	GO:0015629	CC	actin cytoskeleton
w_c.1	2	LOC108192423	GO:0030036	BP	actin cytoskeleton organization
w_c.1	3	LOC108209094	GO:0005215	MF	transporter activity
w_c.1	3	LOC108209094	GO:0006810	BP	transport
w_c.1	3	LOC108209094	GO:0016020	CC	membrane
w_c.1	3	LOC108209961	GO:0009765	BP	photosynthesis, light harvesting
w_c.1	3	LOC108209961	GO:0016020	CC	membrane
w_c.1	3	LOC108197341	GO:0009765	BP	photosynthesis, light harvesting
w_c.1	3	LOC108197341	GO:0016020	CC	membrane
w_c.1	4	LOC108211045	GO:0003735	MF	structural constituent of ribosome
w_c.1	4	LOC108211045	GO:0005622	CC	intracellular
w_c.1	4	LOC108211045	GO:0005840	CC	ribosome
w_c.1	4	LOC108211045	GO:0006412	BP	translation
w_c.1	4	LOC108211045	GO:0019843	MF	rRNA binding
w_c.1	4	LOC108213519	GO:0009055	MF	electron carrier activity
w_c.1	4	LOC108213519	GO:0015035	MF	protein disulfide oxidoreductase activity
w_c.1	4	LOC108213519	GO:0045454	BP	cell redox homeostasis
w_c.1	4	LOC108194087	GO:0016021	CC	integral to membrane
w_c.1	4	LOC108197402	GO:0000036	MF	acyl carrier activity
w_c.1	4	LOC108197402	GO:0006633	BP	fatty acid biosynthetic process
w_c.1	4	LOC108197402	GO:0031177	MF	phosphopantetheine binding
w_c.1	4	LOC108197402	GO:0048037	MF	cofactor binding
w_c.1	4	LOC108197070	GO:0005515	MF	protein binding
w_c.1	5	LOC108211704	GO:0008168	MF	methyltransferase activity
w_c.1	5	LOC108211704	GO:0008171	MF	O-methyltransferase activity
w_c.1	5	LOC108211704	GO:0046983	MF	protein dimerization activity
w_c.1	5	LOC108214501	GO:0008168	MF	methyltransferase activity
w_c.1	5	LOC108214501	GO:0008171	MF	O-methyltransferase activity
w_c.1	5	LOC108214501	GO:0046983	MF	protein dimerization activity
w_c.1	5	LOC108225292	GO:0005515	MF	protein binding
w_c.1	5	LOC108197279	GO:0005529	MF	sugar binding
w_c.1	6	LOC108193402	GO:0009765	BP	photosynthesis, light harvesting
w_c.1	6	LOC108193402	GO:0016020	CC	membrane
w_c.1	7	LOC108209137	GO:0015991	BP	ATP hydrolysis coupled proton transport
w_c.1	7	LOC108209137	GO:0033178	CC	proton-transporting two-sector ATPase complex, catalytic domain
w_c.1	7	LOC108209137	GO:0046961	MF	proton-transporting ATPase activity, rotational mechanism
w_c.1	7	LOC108213558	GO:0009055	MF	electron carrier activity
w_c.1	7	LOC108213558	GO:0015035	MF	protein disulfide oxidoreductase activity
w_c.1	7	LOC108213558	GO:0045454	BP	cell redox homeostasis
w_c.1	7	LOC108221993	GO:0000786	CC	nucleosome
w_c.1	7	LOC108221993	GO:0003677	MF	DNA binding
w_c.1	7	LOC108221993	GO:0005634	CC	nucleus
w_c.1	7	LOC108221993	GO:0006334	BP	nucleosome assembly
w_c.1	7	LOC108222262	GO:0003677	MF	DNA binding
w_c.1	7	LOC108228137	GO:0016020	CC	membrane
w_c.1	7	LOC108224387	GO:0003676	MF	nucleic acid binding
w_c.1	7	LOC108196905	GO:0016020	CC	membrane
w_c.1	7	LOC108200598	GO:0003755	MF	peptidyl-prolyl cis-trans isomerase activity
w_c.1	7	LOC108200598	GO:0006457	BP	protein folding
w_c.1	8	LOC108208659	GO:0000786	CC	nucleosome
w_c.1	8	LOC108208659	GO:0003677	MF	DNA binding
w_c.1	8	LOC108208659	GO:0005634	CC	nucleus
w_c.1	8	LOC108208659	GO:0006334	BP	nucleosome assembly
w_c.1	8	LOC108211211	GO:0008152	BP	metabolic process
w_c.1	8	LOC108211211	GO:0008168	MF	methyltransferase activity
w_c.1	8	LOC108213070	GO:0000276	CC	mitochondrial proton-transporting ATP synthase complex, coupling factor F(o)
w_c.1	8	LOC108213070	GO:0015078	MF	hydrogen ion transmembrane transporter activity
w_c.1	8	LOC108213070	GO:0015986	BP	ATP synthesis coupled proton transport
w_c.1	8	LOC108219750	GO:0016491	MF	oxidoreductase activity
w_c.1	8	LOC108219750	GO:0055114	BP	oxidation-reduction process
w_c.1	8	LOC108223791	GO:0004784	MF	superoxide dismutase activity
w_c.1	8	LOC108223791	GO:0006801	BP	superoxide metabolic process
w_c.1	8	LOC108223791	GO:0046872	MF	metal ion binding
w_c.1	8	LOC108223791	GO:0055114	BP	oxidation-reduction process
w_c.1	8	LOC108227573	GO:0009055	MF	electron carrier activity
w_c.1	8	LOC108227573	GO:0015035	MF	protein disulfide oxidoreductase activity
w_c.1	8	LOC108227573	GO:0045454	BP	cell redox homeostasis
w_c.1	8	LOC108224991	GO:0006457	BP	protein folding
w_c.1	8	LOC108224991	GO:0016272	CC	prefoldin complex
w_c.1	8	LOC108224991	GO:0051082	MF	unfolded protein binding
w_c.1	8	LOC108228023	GO:0008483	MF	transaminase activity
w_c.1	8	LOC108228023	GO:0030170	MF	pyridoxal phosphate binding
w_c.1	8	LOC108228023	GO:0033014	BP	tetrapyrrole biosynthetic process
w_c.1	8	LOC108228023	GO:0042286	MF	glutamate-1-semialdehyde 2,1-aminomutase activity
w_c.1	8	LOC108197462	GO:0000276	CC	mitochondrial proton-transporting ATP synthase complex, coupling factor F(o)
w_c.1	8	LOC108197462	GO:0015078	MF	hydrogen ion transmembrane transporter activity
w_c.1	8	LOC108197462	GO:0015986	BP	ATP synthesis coupled proton transport
w_c.1	9	LOC108203001	GO:0016620	MF	oxidoreductase activity, acting on the aldehyde or oxo group of donors, NAD or NADP as acceptor
w_c.1	9	LOC108203001	GO:0055114	BP	oxidation-reduction process
w_c.1	10	LOC108227365	GO:0005515	MF	protein binding
w_c.1	10	LOC108204625	GO:0003735	MF	structural constituent of ribosome
w_c.1	10	LOC108204625	GO:0005622	CC	intracellular
w_c.1	10	LOC108204625	GO:0005840	CC	ribosome
w_c.1	10	LOC108204625	GO:0006412	BP	translation
w_c.1	10	LOC108206115	GO:0020037	MF	heme binding
w_c.1	10	LOC108210830	GO:0008565	MF	protein transporter activity
w_c.1	10	LOC108210830	GO:0009306	BP	protein secretion
w_c.1	10	LOC108210830	GO:0015031	BP	protein transport
w_c.1	10	LOC108210830	GO:0016020	CC	membrane
w_c.1	10	LOC108210693	GO:0004175	MF	endopeptidase activity
w_c.1	10	LOC108210693	GO:0004298	MF	threonine-type endopeptidase activity
w_c.1	10	LOC108210693	GO:0005839	CC	proteasome core complex
w_c.1	10	LOC108210693	GO:0006511	BP	ubiquitin-dependent protein catabolic process
w_c.1	10	LOC108210693	GO:0019773	CC	proteasome core complex, alpha-subunit complex
w_c.1	10	LOC108210693	GO:0051603	BP	proteolysis involved in cellular protein catabolic process
w_c.1	10	LOC108220701	GO:0006457	BP	protein folding
w_c.1	10	LOC108219932	GO:0005215	MF	transporter activity
w_c.1	10	LOC108219932	GO:0005488	MF	binding
w_c.1	10	LOC108219932	GO:0006810	BP	transport
w_c.1	11	LOC108205454	GO:0004867	MF	serine-type endopeptidase inhibitor activity
w_c.1	11	LOC108202160	GO:0008270	MF	zinc ion binding
w_c.1	11	LOC108202160	GO:0016787	MF	hydrolase activity
w_c.1	11	LOC108204755	GO:0006952	BP	defense response
w_c.1	11	LOC108204755	GO:0043531	MF	ADP binding
w_c.1	11	LOC108205119	GO:0008152	BP	metabolic process
w_c.1	11	LOC108205119	GO:0016491	MF	oxidoreductase activity
w_c.1	11	LOC108207089	GO:0005506	MF	iron ion binding
w_c.1	11	LOC108207089	GO:0009055	MF	electron carrier activity
w_c.1	11	LOC108207089	GO:0016705	MF	oxidoreductase activity, acting on paired donors, with incorporation or reduction of molecular oxygen
w_c.1	11	LOC108207089	GO:0020037	MF	heme binding
w_c.1	11	LOC108207089	GO:0055114	BP	oxidation-reduction process
w_c.1	11	LOC108216140	GO:0008152	BP	metabolic process
w_c.1	11	LOC108216140	GO:0016787	MF	hydrolase activity
w_c.1	11	LOC108211654	GO:0006662	BP	glycerol ether metabolic process
w_c.1	11	LOC108211654	GO:0009055	MF	electron carrier activity
w_c.1	11	LOC108211654	GO:0015035	MF	protein disulfide oxidoreductase activity
w_c.1	11	LOC108211654	GO:0045454	BP	cell redox homeostasis
w_c.1	11	LOC108215152	GO:0004144	MF	diacylglycerol O-acyltransferase activity
w_c.1	11	LOC108205288	GO:0005525	MF	GTP binding
w_c.1	11	LOC108205173	GO:0003824	MF	catalytic activity
w_c.1	11	LOC108205173	GO:0008762	MF	UDP-N-acetylmuramate dehydrogenase activity
w_c.1	11	LOC108205173	GO:0009690	BP	cytokinin metabolic process
w_c.1	11	LOC108205173	GO:0016491	MF	oxidoreductase activity
w_c.1	11	LOC108205173	GO:0016614	MF	oxidoreductase activity, acting on CH-OH group of donors
w_c.1	11	LOC108205173	GO:0019139	MF	cytokinin dehydrogenase activity
w_c.1	11	LOC108205173	GO:0050660	MF	flavin adenine dinucleotide binding
w_c.1	11	LOC108205173	GO:0055114	BP	oxidation-reduction process
w_c.1	11	LOC108212345	GO:0003676	MF	nucleic acid binding
w_c.1	11	LOC108212345	GO:0004386	MF	helicase activity
w_c.1	11	LOC108212345	GO:0005524	MF	ATP binding
w_c.1	11	LOC108212345	GO:0008026	MF	ATP-dependent helicase activity
w_c.1	11	LOC108205668	GO:0006629	BP	lipid metabolic process
w_c.1	11	LOC108205668	GO:0016788	MF	hydrolase activity, acting on ester bonds
w_c.1	11	LOC108209834	GO:0004066	MF	asparagine synthase (glutamine-hydrolyzing) activity
w_c.1	11	LOC108209834	GO:0006529	BP	asparagine biosynthetic process
w_c.1	11	LOC108209872	GO:0008152	BP	metabolic process
w_c.1	11	LOC108209872	GO:0016758	MF	transferase activity, transferring hexosyl groups
w_c.1	11	LOC108206417	GO:0005506	MF	iron ion binding
w_c.1	11	LOC108206417	GO:0009055	MF	electron carrier activity
w_c.1	11	LOC108206417	GO:0016705	MF	oxidoreductase activity, acting on paired donors, with incorporation or reduction of molecular oxygen
w_c.1	11	LOC108206417	GO:0020037	MF	heme binding
w_c.1	11	LOC108206417	GO:0055114	BP	oxidation-reduction process
w_c.1	11	LOC108205802	GO:0005975	BP	carbohydrate metabolic process
w_c.1	11	LOC108206304	GO:0004672	MF	protein kinase activity
w_c.1	11	LOC108206304	GO:0004674	MF	protein serine/threonine kinase activity
w_c.1	11	LOC108206304	GO:0004713	MF	protein tyrosine kinase activity
w_c.1	11	LOC108206304	GO:0005524	MF	ATP binding
w_c.1	11	LOC108206304	GO:0006468	BP	protein phosphorylation
w_c.1	11	LOC108206837	GO:0005506	MF	iron ion binding
w_c.1	11	LOC108206837	GO:0009055	MF	electron carrier activity
w_c.1	11	LOC108206837	GO:0016705	MF	oxidoreductase activity, acting on paired donors, with incorporation or reduction of molecular oxygen
w_c.1	11	LOC108206837	GO:0020037	MF	heme binding
w_c.1	11	LOC108206837	GO:0055114	BP	oxidation-reduction process
w_c.1	11	LOC108214915	GO:0008152	BP	metabolic process
w_c.1	11	LOC108214915	GO:0016758	MF	transferase activity, transferring hexosyl groups
w_c.1	11	LOC108214104	GO:0004601	MF	peroxidase activity
w_c.1	11	LOC108214104	GO:0006979	BP	response to oxidative stress
w_c.1	11	LOC108214104	GO:0020037	MF	heme binding
w_c.1	11	LOC108214104	GO:0055114	BP	oxidation-reduction process
w_c.1	11	LOC108211382	GO:0016884	MF	carbon-nitrogen ligase activity, with glutamine as amido-N-donor
w_c.1	11	LOC108213746	GO:0005515	MF	protein binding
w_c.1	11	LOC108213746	GO:0008270	MF	zinc ion binding
w_c.1	11	LOC108214175	GO:0008270	MF	zinc ion binding
w_c.1	11	LOC108214175	GO:0016787	MF	hydrolase activity
w_c.1	11	LOC108210779	GO:0003700	MF	sequence-specific DNA binding transcription factor activity
w_c.1	11	LOC108210779	GO:0006355	BP	regulation of transcription, DNA-dependent
w_c.1	11	LOC108210779	GO:0043565	MF	sequence-specific DNA binding
w_c.1	11	LOC108210779	GO:0046983	MF	protein dimerization activity
w_c.1	11	LOC108214902	GO:0004672	MF	protein kinase activity
w_c.1	11	LOC108214902	GO:0004674	MF	protein serine/threonine kinase activity
w_c.1	11	LOC108214902	GO:0004713	MF	protein tyrosine kinase activity
w_c.1	11	LOC108214902	GO:0005524	MF	ATP binding
w_c.1	11	LOC108214902	GO:0006468	BP	protein phosphorylation
w_c.1	11	LOC108215382	GO:0006952	BP	defense response
w_c.1	11	LOC108215382	GO:0043531	MF	ADP binding
w_c.1	11	LOC108210774	GO:0004866	MF	endopeptidase inhibitor activity
w_c.1	11	LOC108214210	GO:0004748	MF	ribonucleoside-diphosphate reductase activity
w_c.1	11	LOC108214210	GO:0005524	MF	ATP binding
w_c.1	11	LOC108214210	GO:0005971	CC	ribonucleoside-diphosphate reductase complex
w_c.1	11	LOC108214210	GO:0006260	BP	DNA replication
w_c.1	11	LOC108214210	GO:0055114	BP	oxidation-reduction process
w_c.1	11	LOC108211832	GO:0005506	MF	iron ion binding
w_c.1	11	LOC108211832	GO:0009055	MF	electron carrier activity
w_c.1	11	LOC108211832	GO:0016705	MF	oxidoreductase activity, acting on paired donors, with incorporation or reduction of molecular oxygen
w_c.1	11	LOC108211832	GO:0020037	MF	heme binding
w_c.1	11	LOC108211832	GO:0055114	BP	oxidation-reduction process
w_c.1	11	LOC108210516	GO:0006071	BP	glycerol metabolic process
w_c.1	11	LOC108210516	GO:0008889	MF	glycerophosphodiester phosphodiesterase activity
w_c.1	11	LOC108210952	GO:0005506	MF	iron ion binding
w_c.1	11	LOC108210952	GO:0009055	MF	electron carrier activity
w_c.1	11	LOC108210952	GO:0016705	MF	oxidoreductase activity, acting on paired donors, with incorporation or reduction of molecular oxygen
w_c.1	11	LOC108210952	GO:0020037	MF	heme binding
w_c.1	11	LOC108210952	GO:0055114	BP	oxidation-reduction process
w_c.1	11	LOC108213022	GO:0003824	MF	catalytic activity
w_c.1	11	LOC108212818	GO:0005515	MF	protein binding
w_c.1	11	LOC108210581	GO:0003824	MF	catalytic activity
w_c.1	11	LOC108210581	GO:0008762	MF	UDP-N-acetylmuramate dehydrogenase activity
w_c.1	11	LOC108210581	GO:0016491	MF	oxidoreductase activity
w_c.1	11	LOC108210581	GO:0016614	MF	oxidoreductase activity, acting on CH-OH group of donors
w_c.1	11	LOC108210581	GO:0050660	MF	flavin adenine dinucleotide binding
w_c.1	11	LOC108210581	GO:0055114	BP	oxidation-reduction process
w_c.1	11	LOC108216452	GO:0003824	MF	catalytic activity
w_c.1	11	LOC108218660	GO:0005515	MF	protein binding
w_c.1	11	LOC108216237	GO:0009058	BP	biosynthetic process
w_c.1	11	LOC108216237	GO:0009435	BP	NAD biosynthetic process
w_c.1	11	LOC108216237	GO:0016779	MF	nucleotidyltransferase activity
w_c.1	11	LOC108219489	GO:0006904	BP	vesicle docking involved in exocytosis
w_c.1	11	LOC108219489	GO:0016192	BP	vesicle-mediated transport
w_c.1	11	LOC108218455	GO:0004553	MF	hydrolase activity, hydrolyzing O-glycosyl compounds
w_c.1	11	LOC108218455	GO:0005975	BP	carbohydrate metabolic process
w_c.1	11	LOC108218692	GO:0005525	MF	GTP binding
w_c.1	11	LOC108218692	GO:0006629	BP	lipid metabolic process
w_c.1	11	LOC108217844	GO:0003677	MF	DNA binding
w_c.1	11	LOC108218391	GO:0004672	MF	protein kinase activity
w_c.1	11	LOC108218391	GO:0004674	MF	protein serine/threonine kinase activity
w_c.1	11	LOC108218391	GO:0004713	MF	protein tyrosine kinase activity
w_c.1	11	LOC108218391	GO:0005515	MF	protein binding
w_c.1	11	LOC108218391	GO:0005524	MF	ATP binding
w_c.1	11	LOC108218391	GO:0006468	BP	protein phosphorylation
w_c.1	11	LOC108216790	GO:0004144	MF	diacylglycerol O-acyltransferase activity
w_c.1	11	LOC108215538	GO:0016491	MF	oxidoreductase activity
w_c.1	11	LOC108215538	GO:0055114	BP	oxidation-reduction process
w_c.1	11	LOC108217561	GO:0005524	MF	ATP binding
w_c.1	11	LOC108217561	GO:0006796	BP	phosphate-containing compound metabolic process
w_c.1	11	LOC108217561	GO:0008152	BP	metabolic process
w_c.1	11	LOC108217561	GO:0016301	MF	kinase activity
w_c.1	11	LOC108217561	GO:0016773	MF	phosphotransferase activity, alcohol group as acceptor
w_c.1	11	LOC108217902	GO:0003824	MF	catalytic activity
w_c.1	11	LOC108217902	GO:0008152	BP	metabolic process
w_c.1	11	LOC108219183	GO:0005509	MF	calcium ion binding
w_c.1	11	LOC108219183	GO:0005515	MF	protein binding
w_c.1	11	LOC108219183	GO:0030247	MF	polysaccharide binding
w_c.1	11	LOC108215937	GO:0005525	MF	GTP binding
w_c.1	11	LOC108215937	GO:0007264	BP	small GTPase mediated signal transduction
w_c.1	11	LOC108215937	GO:0015031	BP	protein transport
w_c.1	11	LOC108224130	GO:0005515	MF	protein binding
w_c.1	11	LOC108224130	GO:0008270	MF	zinc ion binding
w_c.1	11	LOC108224130	GO:0016881	MF	acid-amino acid ligase activity
w_c.1	11	LOC108223612	GO:0005515	MF	protein binding
w_c.1	11	LOC108223625	GO:0004144	MF	diacylglycerol O-acyltransferase activity
w_c.1	11	LOC108221073	GO:0005737	CC	cytoplasm
w_c.1	11	LOC108221073	GO:0006535	BP	cysteine biosynthetic process from serine
w_c.1	11	LOC108221073	GO:0009001	MF	serine O-acetyltransferase activity
w_c.1	11	LOC108221073	GO:0016740	MF	transferase activity
w_c.1	11	LOC108223026	GO:0005515	MF	protein binding
w_c.1	11	LOC108221927	GO:0008152	BP	metabolic process
w_c.1	11	LOC108221927	GO:0016758	MF	transferase activity, transferring hexosyl groups
w_c.1	11	LOC108222817	GO:0004553	MF	hydrolase activity, hydrolyzing O-glycosyl compounds
w_c.1	11	LOC108222817	GO:0004564	MF	beta-fructofuranosidase activity
w_c.1	11	LOC108222817	GO:0004575	MF	sucrose alpha-glucosidase activity
w_c.1	11	LOC108222817	GO:0005975	BP	carbohydrate metabolic process
w_c.1	11	LOC108220674	GO:0005634	CC	nucleus
w_c.1	11	LOC108220674	GO:0006355	BP	regulation of transcription, DNA-dependent
w_c.1	11	LOC108220674	GO:0046983	MF	protein dimerization activity
w_c.1	11	LOC108222983	GO:0016020	CC	membrane
w_c.1	11	LOC108222983	GO:0030001	BP	metal ion transport
w_c.1	11	LOC108222983	GO:0046873	MF	metal ion transmembrane transporter activity
w_c.1	11	LOC108222983	GO:0055085	BP	transmembrane transport
w_c.1	11	LOC108223664	GO:0005515	MF	protein binding
w_c.1	11	LOC108223664	GO:0008270	MF	zinc ion binding
w_c.1	11	LOC108221735	GO:0003676	MF	nucleic acid binding
w_c.1	11	LOC108221735	GO:0005515	MF	protein binding
w_c.1	11	LOC108221735	GO:0008270	MF	zinc ion binding
w_c.1	11	LOC108222823	GO:0003924	MF	GTPase activity
w_c.1	11	LOC108222823	GO:0005525	MF	GTP binding
w_c.1	11	LOC108223802	GO:0004930	MF	G-protein coupled receptor activity
w_c.1	11	LOC108223802	GO:0004965	MF	G-protein coupled GABA receptor activity
w_c.1	11	LOC108223802	GO:0004970	MF	ionotropic glutamate receptor activity
w_c.1	11	LOC108223802	GO:0005215	MF	transporter activity
w_c.1	11	LOC108223802	GO:0005234	MF	extracellular-glutamate-gated ion channel activity
w_c.1	11	LOC108223802	GO:0006810	BP	transport
w_c.1	11	LOC108223802	GO:0007186	BP	G-protein coupled receptor signaling pathway
w_c.1	11	LOC108223802	GO:0016020	CC	membrane
w_c.1	11	LOC108223802	GO:0016021	CC	integral to membrane
w_c.1	11	LOC108223802	GO:0030288	CC	outer membrane-bounded periplasmic space
w_c.1	11	LOC108223116	GO:0004553	MF	hydrolase activity, hydrolyzing O-glycosyl compounds
w_c.1	11	LOC108223116	GO:0005975	BP	carbohydrate metabolic process
w_c.1	11	LOC108223116	GO:0016798	MF	hydrolase activity, acting on glycosyl bonds
w_c.1	11	LOC108224314	GO:0008375	MF	acetylglucosaminyltransferase activity
w_c.1	11	LOC108224314	GO:0016020	CC	membrane
w_c.1	11	LOC108225204	GO:0005515	MF	protein binding
w_c.1	11	LOC108225204	GO:0008270	MF	zinc ion binding
w_c.1	11	LOC108227801	GO:0000062	MF	fatty-acyl-CoA binding
w_c.1	11	LOC108227484	GO:0005515	MF	protein binding
w_c.1	11	LOC108227484	GO:0005524	MF	ATP binding
w_c.1	11	LOC108227484	GO:0005694	CC	chromosome
w_c.1	11	LOC108227484	GO:0051276	BP	chromosome organization
w_c.1	11	LOC108227627	GO:0006886	BP	intracellular protein transport
w_c.1	11	LOC108227627	GO:0008565	MF	protein transporter activity
w_c.1	11	LOC108225144	GO:0008270	MF	zinc ion binding
w_c.1	11	LOC108225144	GO:0016491	MF	oxidoreductase activity
w_c.1	11	LOC108225144	GO:0055114	BP	oxidation-reduction process
w_c.1	11	LOC108227456	GO:0000166	MF	nucleotide binding
w_c.1	11	LOC108227456	GO:0005524	MF	ATP binding
w_c.1	11	LOC108227456	GO:0006812	BP	cation transport
w_c.1	11	LOC108227456	GO:0015662	MF	ATPase activity, coupled to transmembrane movement of ions, phosphorylative mechanism
w_c.1	11	LOC108227456	GO:0016020	CC	membrane
w_c.1	11	LOC108227456	GO:0046872	MF	metal ion binding
w_c.1	11	LOC108224518	GO:0006952	BP	defense response
w_c.1	11	LOC108224518	GO:0043531	MF	ADP binding
w_c.1	11	LOC108227592	GO:0005515	MF	protein binding
w_c.1	11	LOC108192913	GO:0008152	BP	metabolic process
w_c.1	11	LOC108192913	GO:0016758	MF	transferase activity, transferring hexosyl groups
w_c.1	11	LOC108227983	GO:0005515	MF	protein binding
w_c.1	11	LOC108228009	GO:0005515	MF	protein binding
w_c.1	11	LOC108227092	GO:0004672	MF	protein kinase activity
w_c.1	11	LOC108227092	GO:0004713	MF	protein tyrosine kinase activity
w_c.1	11	LOC108227092	GO:0005515	MF	protein binding
w_c.1	11	LOC108227092	GO:0005524	MF	ATP binding
w_c.1	11	LOC108227092	GO:0006468	BP	protein phosphorylation
w_c.1	11	LOC108227495	GO:0003676	MF	nucleic acid binding
w_c.1	11	LOC108227495	GO:0003677	MF	DNA binding
w_c.1	11	LOC108227495	GO:0004386	MF	helicase activity
w_c.1	11	LOC108227495	GO:0005515	MF	protein binding
w_c.1	11	LOC108227495	GO:0005524	MF	ATP binding
w_c.1	11	LOC108227495	GO:0008270	MF	zinc ion binding
w_c.1	11	LOC108227269	GO:0003700	MF	sequence-specific DNA binding transcription factor activity
w_c.1	11	LOC108227269	GO:0006355	BP	regulation of transcription, DNA-dependent
w_c.1	11	LOC108227269	GO:0043565	MF	sequence-specific DNA binding
w_c.1	11	LOC108227595	GO:0005515	MF	protein binding
w_c.1	11	LOC108224257	GO:0006629	BP	lipid metabolic process
w_c.1	11	LOC108224469	GO:0003942	MF	N-acetyl-gamma-glutamyl-phosphate reductase activity
w_c.1	11	LOC108224469	GO:0005737	CC	cytoplasm
w_c.1	11	LOC108224469	GO:0006520	BP	cellular amino acid metabolic process
w_c.1	11	LOC108224469	GO:0008652	BP	cellular amino acid biosynthetic process
w_c.1	11	LOC108224469	GO:0016620	MF	oxidoreductase activity, acting on the aldehyde or oxo group of donors, NAD or NADP as acceptor
w_c.1	11	LOC108224469	GO:0046983	MF	protein dimerization activity
w_c.1	11	LOC108224469	GO:0051287	MF	NAD binding
w_c.1	11	LOC108224469	GO:0055114	BP	oxidation-reduction process
w_c.1	11	LOC108224820	GO:0005506	MF	iron ion binding
w_c.1	11	LOC108224820	GO:0009055	MF	electron carrier activity
w_c.1	11	LOC108224820	GO:0016705	MF	oxidoreductase activity, acting on paired donors, with incorporation or reduction of molecular oxygen
w_c.1	11	LOC108224820	GO:0020037	MF	heme binding
w_c.1	11	LOC108224820	GO:0055114	BP	oxidation-reduction process
w_c.1	11	LOC108228038	GO:0008270	MF	zinc ion binding
w_c.1	11	LOC108196248	GO:0005524	MF	ATP binding
w_c.1	11	LOC108196248	GO:0016301	MF	kinase activity
w_c.1	11	LOC108196248	GO:0016310	BP	phosphorylation
w_c.1	11	LOC108196248	GO:0016772	MF	transferase activity, transferring phosphorus-containing groups
w_c.1	11	LOC108196248	GO:0050242	MF	pyruvate, phosphate dikinase activity
w_c.1	11	LOC108193334	GO:0003723	MF	RNA binding
w_c.1	11	LOC108195352	GO:0005515	MF	protein binding
w_c.1	11	LOC108193392	GO:0004672	MF	protein kinase activity
w_c.1	11	LOC108193392	GO:0004674	MF	protein serine/threonine kinase activity
w_c.1	11	LOC108193392	GO:0004713	MF	protein tyrosine kinase activity
w_c.1	11	LOC108193392	GO:0005515	MF	protein binding
w_c.1	11	LOC108193392	GO:0005524	MF	ATP binding
w_c.1	11	LOC108193392	GO:0006468	BP	protein phosphorylation
w_c.1	11	LOC108195170	GO:0005215	MF	transporter activity
w_c.1	11	LOC108195170	GO:0006810	BP	transport
w_c.1	11	LOC108195170	GO:0008271	MF	secondary active sulfate transmembrane transporter activity
w_c.1	11	LOC108195170	GO:0008272	BP	sulfate transport
w_c.1	11	LOC108195170	GO:0016020	CC	membrane
w_c.1	11	LOC108195170	GO:0016021	CC	integral to membrane
w_c.1	11	LOC108195170	GO:0055085	BP	transmembrane transport
w_c.1	11	LOC108196353	GO:0003913	MF	DNA photolyase activity
w_c.1	11	LOC108196353	GO:0006281	BP	DNA repair
w_c.1	11	LOC108193840	GO:0005506	MF	iron ion binding
w_c.1	11	LOC108193840	GO:0009055	MF	electron carrier activity
w_c.1	11	LOC108193840	GO:0016705	MF	oxidoreductase activity, acting on paired donors, with incorporation or reduction of molecular oxygen
w_c.1	11	LOC108193840	GO:0020037	MF	heme binding
w_c.1	11	LOC108193840	GO:0055114	BP	oxidation-reduction process
w_c.1	11	LOC108195897	GO:0000166	MF	nucleotide binding
w_c.1	11	LOC108195897	GO:0003677	MF	DNA binding
w_c.1	11	LOC108195897	GO:0003697	MF	single-stranded DNA binding
w_c.1	11	LOC108195897	GO:0004672	MF	protein kinase activity
w_c.1	11	LOC108195897	GO:0004674	MF	protein serine/threonine kinase activity
w_c.1	11	LOC108195897	GO:0004713	MF	protein tyrosine kinase activity
w_c.1	11	LOC108195897	GO:0005524	MF	ATP binding
w_c.1	11	LOC108195897	GO:0006259	BP	DNA metabolic process
w_c.1	11	LOC108195897	GO:0006281	BP	DNA repair
w_c.1	11	LOC108195897	GO:0006468	BP	protein phosphorylation
w_c.1	11	LOC108195897	GO:0008094	MF	DNA-dependent ATPase activity
w_c.1	11	LOC108195897	GO:0009432	BP	SOS response
w_c.1	11	LOC108195897	GO:0017111	MF	nucleoside-triphosphatase activity
w_c.1	11	LOC108193669	GO:0004672	MF	protein kinase activity
w_c.1	11	LOC108193669	GO:0004674	MF	protein serine/threonine kinase activity
w_c.1	11	LOC108193669	GO:0004713	MF	protein tyrosine kinase activity
w_c.1	11	LOC108193669	GO:0005524	MF	ATP binding
w_c.1	11	LOC108193669	GO:0006468	BP	protein phosphorylation
w_c.1	11	LOC108195838	GO:0005515	MF	protein binding
w_c.1	11	LOC108193476	GO:0004806	MF	triglyceride lipase activity
w_c.1	11	LOC108193476	GO:0006629	BP	lipid metabolic process
w_c.1	11	LOC108197056	GO:0004222	MF	metalloendopeptidase activity
w_c.1	11	LOC108197056	GO:0006508	BP	proteolysis
w_c.1	11	LOC108197383	GO:0004553	MF	hydrolase activity, hydrolyzing O-glycosyl compounds
w_c.1	11	LOC108197383	GO:0005618	CC	cell wall
w_c.1	11	LOC108197383	GO:0005975	BP	carbohydrate metabolic process
w_c.1	11	LOC108197383	GO:0006073	BP	cellular glucan metabolic process
w_c.1	11	LOC108197383	GO:0016762	MF	xyloglucan:xyloglucosyl transferase activity
w_c.1	11	LOC108197383	GO:0048046	CC	apoplast
w_c.1	11	LOC108197085	GO:0016491	MF	oxidoreductase activity
w_c.1	11	LOC108197085	GO:0055114	BP	oxidation-reduction process
w_c.1	11	LOC108197428	GO:0006621	BP	protein retention in ER lumen
w_c.1	11	LOC108197428	GO:0016021	CC	integral to membrane
w_c.1	11	LOC108197428	GO:0046923	MF	ER retention sequence binding
w_c.1	11	LOC108198565	GO:0006952	BP	defense response
w_c.1	11	LOC108198565	GO:0043531	MF	ADP binding
w_c.1	11	LOC108199406	GO:0003824	MF	catalytic activity
w_c.1	11	LOC108199406	GO:0003857	MF	3-hydroxyacyl-CoA dehydrogenase activity
w_c.1	11	LOC108199406	GO:0006631	BP	fatty acid metabolic process
w_c.1	11	LOC108199406	GO:0008152	BP	metabolic process
w_c.1	11	LOC108199406	GO:0016491	MF	oxidoreductase activity
w_c.1	11	LOC108199406	GO:0055114	BP	oxidation-reduction process
w_c.1	11	LOC108197679	GO:0008152	BP	metabolic process
w_c.1	11	LOC108197679	GO:0016758	MF	transferase activity, transferring hexosyl groups
w_c.1	11	LOC108199732	GO:0005515	MF	protein binding
w_c.1	11	LOC108199837	GO:0008152	BP	metabolic process
w_c.1	11	LOC108199837	GO:0016758	MF	transferase activity, transferring hexosyl groups
w_c.1	11	LOC108197417	GO:0005515	MF	protein binding
w_c.1	11	LOC108197417	GO:0008270	MF	zinc ion binding
w_c.1	11	LOC108199320	GO:0005506	MF	iron ion binding
w_c.1	11	LOC108199320	GO:0016491	MF	oxidoreductase activity
w_c.1	11	LOC108199320	GO:0016706	MF	oxidoreductase activity, acting on paired donors, with incorporation or reduction of molecular oxygen, 2-oxoglutarate as one donor, and incorporation of one atom each of oxygen into both donors
w_c.1	11	LOC108199320	GO:0055114	BP	oxidation-reduction process
w_c.1	11	LOC108197075	GO:0016747	MF	transferase activity, transferring acyl groups other than amino-acyl groups
w_c.1	11	LOC108199986	GO:0046854	BP	phosphatidylinositol phosphorylation
w_c.1	11	LOC108199730	GO:0008152	BP	metabolic process
w_c.1	11	LOC108199730	GO:0016758	MF	transferase activity, transferring hexosyl groups
w_c.1	11	LOC108200050	GO:0006886	BP	intracellular protein transport
w_c.1	11	LOC108197342	GO:0005506	MF	iron ion binding
w_c.1	11	LOC108197342	GO:0016491	MF	oxidoreductase activity
w_c.1	11	LOC108197342	GO:0016706	MF	oxidoreductase activity, acting on paired donors, with incorporation or reduction of molecular oxygen, 2-oxoglutarate as one donor, and incorporation of one atom each of oxygen into both donors
w_c.1	11	LOC108197342	GO:0055114	BP	oxidation-reduction process
w_c.1	11	LOC108199956	GO:0005524	MF	ATP binding
w_c.1	11	LOC108199956	GO:0005618	CC	cell wall
w_c.1	11	LOC108199956	GO:0005737	CC	cytoplasm
w_c.1	11	LOC108199956	GO:0008716	MF	D-alanine-D-alanine ligase activity
w_c.1	11	LOC108199956	GO:0009252	BP	peptidoglycan biosynthetic process
w_c.1	11	LOC108199956	GO:0046872	MF	metal ion binding
w_c.1	11	LOC108200706	GO:0008152	BP	metabolic process
w_c.1	11	LOC108200706	GO:0016758	MF	transferase activity, transferring hexosyl groups
w_c.1	11	LOC108202827	GO:0016884	MF	carbon-nitrogen ligase activity, with glutamine as amido-N-donor
w_c.1	11	LOC108200603	GO:0005515	MF	protein binding
w_c.1	11	LOC108200580	GO:0016021	CC	integral to membrane
w_c.1	11	LOC108200580	GO:0055085	BP	transmembrane transport
w_c.1	11	LOC108201936	GO:0006629	BP	lipid metabolic process
w_c.1	11	LOC108201936	GO:0016788	MF	hydrolase activity, acting on ester bonds
w_c.1	11	LOC108200946	GO:0003824	MF	catalytic activity
w_c.1	11	LOC108200946	GO:0044237	BP	cellular metabolic process
w_c.1	11	LOC108200946	GO:0050662	MF	coenzyme binding
w_c.1	11	LOC108202834	GO:0005215	MF	transporter activity
w_c.1	11	LOC108202834	GO:0006857	BP	oligopeptide transport
w_c.1	11	LOC108202834	GO:0016020	CC	membrane
w_c.1	11	LOC108200383	GO:0005737	CC	cytoplasm
w_c.1	11	LOC108200383	GO:0006508	BP	proteolysis
w_c.1	11	LOC108200383	GO:0008239	MF	dipeptidyl-peptidase activity
w_c.1	11	LOC108200383	GO:0016787	MF	hydrolase activity
w_c.1	11	LOC108202810	GO:0008152	BP	metabolic process
w_c.1	11	LOC108202810	GO:0016787	MF	hydrolase activity
w_c.1	11	LOC108203048	GO:0003676	MF	nucleic acid binding
w_c.1	11	LOC108202446	GO:0003677	MF	DNA binding
w_c.1	11	LOC108202446	GO:0005515	MF	protein binding
w_c.1	11	LOC108202446	GO:0005634	CC	nucleus
w_c.1	11	LOC108202446	GO:0008270	MF	zinc ion binding
w_c.1	11	LOC108200488	GO:0006855	BP	drug transmembrane transport
w_c.1	11	LOC108200488	GO:0015238	MF	drug transmembrane transporter activity
w_c.1	11	LOC108200488	GO:0015297	MF	antiporter activity
w_c.1	11	LOC108200488	GO:0016020	CC	membrane
w_c.1	11	LOC108200488	GO:0055085	BP	transmembrane transport
w_c.1	11	LOC108203046	GO:0003824	MF	catalytic activity
w_c.1	11	LOC108203046	GO:0008152	BP	metabolic process
w_c.1	11	LOC108192368	GO:0004857	MF	enzyme inhibitor activity
w_c.1	11	LOC108192368	GO:0005618	CC	cell wall
w_c.1	11	LOC108192368	GO:0030599	MF	pectinesterase activity
w_c.1	11	LOC108192368	GO:0042545	BP	cell wall modification
w_c.1	11	LOC108193163	GO:0006952	BP	defense response
w_c.1	11	LOC108193163	GO:0043531	MF	ADP binding
w_c.1	11	LOC108192392	GO:0005515	MF	protein binding
w_c.1	11	LOC108192286	GO:0003723	MF	RNA binding
w_c.1	11	LOC108192286	GO:0006364	BP	rRNA processing
w_c.1	11	LOC108192286	GO:0008033	BP	tRNA processing
w_c.1	11	LOC108192286	GO:0008168	MF	methyltransferase activity
w_c.1	12	LOC108204319	GO:0009765	BP	photosynthesis, light harvesting
w_c.1	12	LOC108204319	GO:0016020	CC	membrane
w_c.1	12	LOC108206146	GO:0009765	BP	photosynthesis, light harvesting
w_c.1	12	LOC108206146	GO:0016020	CC	membrane
w_c.1	12	LOC108220553	GO:0003735	MF	structural constituent of ribosome
w_c.1	12	LOC108220553	GO:0005622	CC	intracellular
w_c.1	12	LOC108220553	GO:0005840	CC	ribosome
w_c.1	12	LOC108220553	GO:0006412	BP	translation
w_c.1	12	LOC108227245	GO:0004857	MF	enzyme inhibitor activity
w_c.1	12	LOC108227245	GO:0030599	MF	pectinesterase activity
w_c.1	12	LOC108197064	GO:0003735	MF	structural constituent of ribosome
w_c.1	12	LOC108197064	GO:0005622	CC	intracellular
w_c.1	12	LOC108197064	GO:0005840	CC	ribosome
w_c.1	12	LOC108197064	GO:0006412	BP	translation
w_c.1	12	LOC108202678	GO:0045454	BP	cell redox homeostasis
w_c.1	12	LOC108202678	GO:0047134	MF	protein-disulfide reductase activity
w_c.1	12	LOC108202678	GO:0055114	BP	oxidation-reduction process
w_c.1	13	LOC108200588	GO:0005507	MF	copper ion binding
w_c.1	13	LOC108200588	GO:0009055	MF	electron carrier activity
w_c.1	14	LOC108206646	GO:0005215	MF	transporter activity
w_c.1	14	LOC108206646	GO:0006810	BP	transport
w_c.1	14	LOC108206646	GO:0016020	CC	membrane
w_c.1	14	LOC108210026	GO:0005215	MF	transporter activity
w_c.1	14	LOC108210026	GO:0006857	BP	oligopeptide transport
w_c.1	14	LOC108210026	GO:0016020	CC	membrane
w_c.1	14	LOC108208721	GO:0016021	CC	integral to membrane
w_c.1	14	LOC108211525	GO:0008152	BP	metabolic process
w_c.1	14	LOC108211525	GO:0016758	MF	transferase activity, transferring hexosyl groups
w_c.1	14	LOC108221478	GO:0003824	MF	catalytic activity
w_c.1	14	LOC108221478	GO:0044237	BP	cellular metabolic process
w_c.1	14	LOC108221478	GO:0050662	MF	coenzyme binding
w_c.1	14	LOC108220256	GO:0003735	MF	structural constituent of ribosome
w_c.1	14	LOC108220256	GO:0005622	CC	intracellular
w_c.1	14	LOC108220256	GO:0005840	CC	ribosome
w_c.1	14	LOC108220256	GO:0006412	BP	translation
w_c.1	14	LOC108193644	GO:0006629	BP	lipid metabolic process
w_c.1	14	LOC108193644	GO:0020037	MF	heme binding
w_c.1	14	LOC108201819	GO:0005199	MF	structural constituent of cell wall
w_c.1	14	LOC108201819	GO:0009664	BP	plant-type cell wall organization
w_c.2	1	LOC108202895	GO:0005516	MF	calmodulin binding
w_c.2	1	LOC108202895	GO:0009522	CC	photosystem I
w_c.2	1	LOC108202895	GO:0015979	BP	photosynthesis
w_c.2	1	LOC108202895	GO:0042651	CC	thylakoid membrane
w_c.2	1	LOC108205208	GO:0015986	BP	ATP synthesis coupled proton transport
w_c.2	1	LOC108205208	GO:0045261	CC	proton-transporting ATP synthase complex, catalytic core F(1)
w_c.2	1	LOC108205208	GO:0046933	MF	hydrogen ion transporting ATP synthase activity, rotational mechanism
w_c.2	1	LOC108205208	GO:0046961	MF	proton-transporting ATPase activity, rotational mechanism
w_c.2	1	LOC108210151	GO:0009523	CC	photosystem II
w_c.2	1	LOC108210151	GO:0015979	BP	photosynthesis
w_c.2	1	LOC108210151	GO:0016020	CC	membrane
w_c.2	1	LOC108214298	GO:0005509	MF	calcium ion binding
w_c.2	1	LOC108214298	GO:0009523	CC	photosystem II
w_c.2	1	LOC108214298	GO:0009654	CC	oxygen evolving complex
w_c.2	1	LOC108214298	GO:0015979	BP	photosynthesis
w_c.2	1	LOC108214298	GO:0019898	CC	extrinsic to membrane
w_c.2	1	LOC108214298	GO:0042549	BP	photosystem II stabilization
w_c.2	1	LOC108218814	GO:0005507	MF	copper ion binding
w_c.2	1	LOC108218814	GO:0009055	MF	electron carrier activity
w_c.2	1	LOC108223489	GO:0009523	CC	photosystem II
w_c.2	1	LOC108223489	GO:0009654	CC	oxygen evolving complex
w_c.2	1	LOC108223489	GO:0015979	BP	photosynthesis
w_c.2	1	LOC108223489	GO:0042651	CC	thylakoid membrane
w_c.2	1	LOC108219969	GO:0009522	CC	photosystem I
w_c.2	1	LOC108219969	GO:0009538	CC	photosystem I reaction center
w_c.2	1	LOC108219969	GO:0015979	BP	photosynthesis
w_c.2	1	LOC108227226	GO:0005509	MF	calcium ion binding
w_c.2	1	LOC108227226	GO:0009523	CC	photosystem II
w_c.2	1	LOC108227226	GO:0009654	CC	oxygen evolving complex
w_c.2	1	LOC108227226	GO:0015979	BP	photosynthesis
w_c.2	1	LOC108227226	GO:0019898	CC	extrinsic to membrane
w_c.2	1	LOC108224294	GO:0009522	CC	photosystem I
w_c.2	1	LOC108224294	GO:0009538	CC	photosystem I reaction center
w_c.2	1	LOC108224294	GO:0015979	BP	photosynthesis
w_c.2	1	LOC108196650	GO:0005509	MF	calcium ion binding
w_c.2	1	LOC108196650	GO:0009523	CC	photosystem II
w_c.2	1	LOC108196650	GO:0009654	CC	oxygen evolving complex
w_c.2	1	LOC108196650	GO:0015979	BP	photosynthesis
w_c.2	1	LOC108196650	GO:0019898	CC	extrinsic to membrane
w_c.2	1	LOC108196650	GO:0042549	BP	photosystem II stabilization
w_c.2	1	LOC108200075	GO:0005509	MF	calcium ion binding
w_c.2	1	LOC108200075	GO:0009523	CC	photosystem II
w_c.2	1	LOC108200075	GO:0009654	CC	oxygen evolving complex
w_c.2	1	LOC108200075	GO:0015979	BP	photosynthesis
w_c.2	1	LOC108200075	GO:0019898	CC	extrinsic to membrane
w_c.2	1	LOC108202621	GO:0009765	BP	photosynthesis, light harvesting
w_c.2	1	LOC108202621	GO:0016020	CC	membrane
w_c.2	2	LOC108204636	GO:0005525	MF	GTP binding
w_c.2	2	LOC108210777	GO:0009512	CC	cytochrome b6f complex
w_c.2	2	LOC108204499	GO:0004332	MF	fructose-bisphosphate aldolase activity
w_c.2	2	LOC108204499	GO:0006096	BP	glycolysis
w_c.2	2	LOC108205276	GO:0000166	MF	nucleotide binding
w_c.2	2	LOC108205276	GO:0015979	BP	photosynthesis
w_c.2	2	LOC108205276	GO:0015995	BP	chlorophyll biosynthetic process
w_c.2	2	LOC108205276	GO:0016851	MF	magnesium chelatase activity
w_c.2	2	LOC108205276	GO:0017111	MF	nucleoside-triphosphatase activity
w_c.2	2	LOC108204903	GO:0005634	CC	nucleus
w_c.2	2	LOC108193733	GO:0000166	MF	nucleotide binding
w_c.2	2	LOC108193733	GO:0004812	MF	aminoacyl-tRNA ligase activity
w_c.2	2	LOC108193733	GO:0005524	MF	ATP binding
w_c.2	2	LOC108193733	GO:0005737	CC	cytoplasm
w_c.2	2	LOC108193733	GO:0006418	BP	tRNA aminoacylation for protein translation
w_c.2	2	LOC108207107	GO:0005515	MF	protein binding
w_c.2	2	LOC108205966	GO:0006950	BP	response to stress
w_c.2	2	LOC108210393	GO:0005515	MF	protein binding
w_c.2	2	LOC108211097	GO:0003700	MF	sequence-specific DNA binding transcription factor activity
w_c.2	2	LOC108211097	GO:0005634	CC	nucleus
w_c.2	2	LOC108211097	GO:0006355	BP	regulation of transcription, DNA-dependent
w_c.2	2	LOC108211097	GO:0043565	MF	sequence-specific DNA binding
w_c.2	2	LOC108216010	GO:0003924	MF	GTPase activity
w_c.2	2	LOC108216010	GO:0005525	MF	GTP binding
w_c.2	2	LOC108216010	GO:0005622	CC	intracellular
w_c.2	2	LOC108216010	GO:0006184	BP	GTP catabolic process
w_c.2	2	LOC108216010	GO:0006886	BP	intracellular protein transport
w_c.2	2	LOC108216010	GO:0006913	BP	nucleocytoplasmic transport
w_c.2	2	LOC108216010	GO:0007165	BP	signal transduction
w_c.2	2	LOC108216010	GO:0007264	BP	small GTPase mediated signal transduction
w_c.2	2	LOC108216010	GO:0015031	BP	protein transport
w_c.2	2	LOC108216010	GO:0016020	CC	membrane
w_c.2	2	LOC108222034	GO:0003735	MF	structural constituent of ribosome
w_c.2	2	LOC108222034	GO:0005622	CC	intracellular
w_c.2	2	LOC108222034	GO:0005840	CC	ribosome
w_c.2	2	LOC108222034	GO:0006412	BP	translation
w_c.2	2	LOC108223777	GO:0005529	MF	sugar binding
w_c.2	2	LOC108223213	GO:0006950	BP	response to stress
w_c.2	2	LOC108223213	GO:0009415	BP	response to water
w_c.2	2	LOC108222893	GO:0005975	BP	carbohydrate metabolic process
w_c.2	2	LOC108222893	GO:0009045	MF	xylose isomerase activity
w_c.2	2	LOC108227479	GO:0003924	MF	GTPase activity
w_c.2	2	LOC108227479	GO:0005525	MF	GTP binding
w_c.2	2	LOC108227479	GO:0005737	CC	cytoplasm
w_c.2	2	LOC108227479	GO:0006184	BP	GTP catabolic process
w_c.2	2	LOC108227479	GO:0043234	CC	protein complex
w_c.2	2	LOC108227479	GO:0051258	BP	protein polymerization
w_c.2	2	LOC108227778	GO:0005515	MF	protein binding
w_c.2	2	LOC108227778	GO:0008270	MF	zinc ion binding
w_c.2	2	LOC108193041	GO:0008152	BP	metabolic process
w_c.2	2	LOC108193041	GO:0016616	MF	oxidoreductase activity, acting on the CH-OH group of donors, NAD or NADP as acceptor
w_c.2	2	LOC108193041	GO:0048037	MF	cofactor binding
w_c.2	2	LOC108193041	GO:0051287	MF	NAD binding
w_c.2	2	LOC108193041	GO:0055114	BP	oxidation-reduction process
w_c.2	2	LOC108193339	GO:0042823	BP	pyridoxal phosphate biosynthetic process
w_c.2	2	LOC108200219	GO:0003723	MF	RNA binding
w_c.2	2	LOC108200219	GO:0003735	MF	structural constituent of ribosome
w_c.2	2	LOC108200219	GO:0006412	BP	translation
w_c.2	2	LOC108200219	GO:0015934	CC	large ribosomal subunit
w_c.2	3	LOC108210017	GO:0000272	BP	polysaccharide catabolic process
w_c.2	3	LOC108210017	GO:0016161	MF	beta-amylase activity
w_c.2	3	LOC108194268	GO:0005875	CC	microtubule associated complex
w_c.2	3	LOC108194268	GO:0007017	BP	microtubule-based process
w_c.2	4	LOC108205433	GO:0016020	CC	membrane
w_c.2	4	LOC108205433	GO:0016628	MF	oxidoreductase activity, acting on the CH-CH group of donors, NAD or NADP as acceptor
w_c.2	4	LOC108205433	GO:0055114	BP	oxidation-reduction process
w_c.2	4	LOC108204680	GO:0008152	BP	metabolic process
w_c.2	4	LOC108204680	GO:0016491	MF	oxidoreductase activity
w_c.2	4	LOC108205412	GO:0015986	BP	ATP synthesis coupled proton transport
w_c.2	4	LOC108205412	GO:0045261	CC	proton-transporting ATP synthase complex, catalytic core F(1)
w_c.2	4	LOC108205412	GO:0046933	MF	hydrogen ion transporting ATP synthase activity, rotational mechanism
w_c.2	4	LOC108205412	GO:0046961	MF	proton-transporting ATPase activity, rotational mechanism
w_c.2	4	LOC108208939	GO:0006950	BP	response to stress
w_c.2	4	LOC108205463	GO:0005783	CC	endoplasmic reticulum
w_c.2	4	LOC108206684	GO:0003700	MF	sequence-specific DNA binding transcription factor activity
w_c.2	4	LOC108206684	GO:0006355	BP	regulation of transcription, DNA-dependent
w_c.2	4	LOC108205185	GO:0005215	MF	transporter activity
w_c.2	4	LOC108205185	GO:0006810	BP	transport
w_c.2	4	LOC108205185	GO:0016020	CC	membrane
w_c.2	4	LOC108210217	GO:0006869	BP	lipid transport
w_c.2	4	LOC108210217	GO:0008289	MF	lipid binding
w_c.2	4	LOC108208919	GO:0000166	MF	nucleotide binding
w_c.2	4	LOC108208919	GO:0004222	MF	metalloendopeptidase activity
w_c.2	4	LOC108208919	GO:0005524	MF	ATP binding
w_c.2	4	LOC108208919	GO:0006508	BP	proteolysis
w_c.2	4	LOC108208919	GO:0017111	MF	nucleoside-triphosphatase activity
w_c.2	4	LOC108214831	GO:0004190	MF	aspartic-type endopeptidase activity
w_c.2	4	LOC108214831	GO:0006508	BP	proteolysis
w_c.2	4	LOC108219376	GO:0003824	MF	catalytic activity
w_c.2	4	LOC108219376	GO:0044237	BP	cellular metabolic process
w_c.2	4	LOC108219376	GO:0050662	MF	coenzyme binding
w_c.2	4	LOC108221993	GO:0000786	CC	nucleosome
w_c.2	4	LOC108221993	GO:0003677	MF	DNA binding
w_c.2	4	LOC108221993	GO:0005634	CC	nucleus
w_c.2	4	LOC108221993	GO:0006334	BP	nucleosome assembly
w_c.2	4	LOC108220132	GO:0003700	MF	sequence-specific DNA binding transcription factor activity
w_c.2	4	LOC108220132	GO:0006355	BP	regulation of transcription, DNA-dependent
w_c.2	4	LOC108220132	GO:0043565	MF	sequence-specific DNA binding
w_c.2	4	LOC108224710	GO:0003735	MF	structural constituent of ribosome
w_c.2	4	LOC108224710	GO:0005622	CC	intracellular
w_c.2	4	LOC108224710	GO:0005840	CC	ribosome
w_c.2	4	LOC108224710	GO:0006412	BP	translation
w_c.2	4	LOC108224396	GO:0016491	MF	oxidoreductase activity
w_c.2	4	LOC108224396	GO:0055114	BP	oxidation-reduction process
w_c.2	4	LOC108224398	GO:0004190	MF	aspartic-type endopeptidase activity
w_c.2	4	LOC108224398	GO:0006508	BP	proteolysis
w_c.2	4	LOC108196584	GO:0003924	MF	GTPase activity
w_c.2	4	LOC108196584	GO:0005198	MF	structural molecule activity
w_c.2	4	LOC108196584	GO:0005525	MF	GTP binding
w_c.2	4	LOC108196584	GO:0005874	CC	microtubule
w_c.2	4	LOC108196584	GO:0006184	BP	GTP catabolic process
w_c.2	4	LOC108196584	GO:0007017	BP	microtubule-based process
w_c.2	4	LOC108196584	GO:0007018	BP	microtubule-based movement
w_c.2	4	LOC108196584	GO:0043234	CC	protein complex
w_c.2	4	LOC108196584	GO:0051258	BP	protein polymerization
w_c.2	4	LOC108195143	GO:0003735	MF	structural constituent of ribosome
w_c.2	4	LOC108195143	GO:0005622	CC	intracellular
w_c.2	4	LOC108195143	GO:0005840	CC	ribosome
w_c.2	4	LOC108195143	GO:0006412	BP	translation
w_c.2	4	LOC108196013	GO:0004672	MF	protein kinase activity
w_c.2	4	LOC108196013	GO:0004674	MF	protein serine/threonine kinase activity
w_c.2	4	LOC108196013	GO:0004713	MF	protein tyrosine kinase activity
w_c.2	4	LOC108196013	GO:0005515	MF	protein binding
w_c.2	4	LOC108196013	GO:0005524	MF	ATP binding
w_c.2	4	LOC108196013	GO:0006468	BP	protein phosphorylation
w_c.2	4	LOC108200606	GO:0008171	MF	O-methyltransferase activity
w_c.2	4	LOC108200598	GO:0003755	MF	peptidyl-prolyl cis-trans isomerase activity
w_c.2	4	LOC108200598	GO:0006457	BP	protein folding
w_c.2	5	LOC108205223	GO:0004190	MF	aspartic-type endopeptidase activity
w_c.2	5	LOC108205223	GO:0006508	BP	proteolysis
w_c.2	5	LOC108218486	GO:0005515	MF	protein binding
w_c.2	5	LOC108219923	GO:0016020	CC	membrane
w_c.2	5	LOC108224641	GO:0003824	MF	catalytic activity
w_c.2	5	LOC108224641	GO:0008762	MF	UDP-N-acetylmuramate dehydrogenase activity
w_c.2	5	LOC108224641	GO:0016491	MF	oxidoreductase activity
w_c.2	5	LOC108224641	GO:0016614	MF	oxidoreductase activity, acting on CH-OH group of donors
w_c.2	5	LOC108224641	GO:0050660	MF	flavin adenine dinucleotide binding
w_c.2	5	LOC108224641	GO:0055114	BP	oxidation-reduction process
w_c.2	5	LOC108226400	GO:0019904	MF	protein domain specific binding
w_c.2	5	LOC108227860	GO:0019904	MF	protein domain specific binding
w_c.2	5	LOC108225176	GO:0000786	CC	nucleosome
w_c.2	5	LOC108225176	GO:0003677	MF	DNA binding
w_c.2	5	LOC108225176	GO:0005634	CC	nucleus
w_c.2	5	LOC108225176	GO:0006334	BP	nucleosome assembly
w_c.2	5	LOC108196255	GO:0004013	MF	adenosylhomocysteinase activity
w_c.2	5	LOC108196255	GO:0006730	BP	one-carbon metabolic process
w_c.2	6	LOC108215819	GO:0008168	MF	methyltransferase activity
w_c.2	6	LOC108215819	GO:0008171	MF	O-methyltransferase activity
w_c.2	6	LOC108215819	GO:0046983	MF	protein dimerization activity
w_c.2	6	LOC108206729	GO:0004221	MF	ubiquitin thiolesterase activity
w_c.2	6	LOC108206729	GO:0005622	CC	intracellular
w_c.2	6	LOC108206729	GO:0006511	BP	ubiquitin-dependent protein catabolic process
w_c.2	6	LOC108205056	GO:0004857	MF	enzyme inhibitor activity
w_c.2	6	LOC108205056	GO:0005618	CC	cell wall
w_c.2	6	LOC108205056	GO:0030599	MF	pectinesterase activity
w_c.2	6	LOC108205056	GO:0042545	BP	cell wall modification
w_c.2	6	LOC108202101	GO:0004553	MF	hydrolase activity, hydrolyzing O-glycosyl compounds
w_c.2	6	LOC108202101	GO:0005975	BP	carbohydrate metabolic process
w_c.2	6	LOC108205150	GO:0005524	MF	ATP binding
w_c.2	6	LOC108205150	GO:0016020	CC	membrane
w_c.2	6	LOC108205150	GO:0016887	MF	ATPase activity
w_c.2	6	LOC108204616	GO:0004190	MF	aspartic-type endopeptidase activity
w_c.2	6	LOC108204616	GO:0006508	BP	proteolysis
w_c.2	6	LOC108204345	GO:0016021	CC	integral to membrane
w_c.2	6	LOC108209046	GO:0016491	MF	oxidoreductase activity
w_c.2	6	LOC108209046	GO:0016706	MF	oxidoreductase activity, acting on paired donors, with incorporation or reduction of molecular oxygen, 2-oxoglutarate as one donor, and incorporation of one atom each of oxygen into both donors
w_c.2	6	LOC108209046	GO:0055114	BP	oxidation-reduction process
w_c.2	6	LOC108205620	GO:0005576	CC	extracellular region
w_c.2	6	LOC108205620	GO:0009664	BP	plant-type cell wall organization
w_c.2	6	LOC108208764	GO:0005515	MF	protein binding
w_c.2	6	LOC108208764	GO:0016773	MF	phosphotransferase activity, alcohol group as acceptor
w_c.2	6	LOC108205654	GO:0004601	MF	peroxidase activity
w_c.2	6	LOC108205654	GO:0006979	BP	response to oxidative stress
w_c.2	6	LOC108205654	GO:0020037	MF	heme binding
w_c.2	6	LOC108205654	GO:0055114	BP	oxidation-reduction process
w_c.2	6	LOC108206290	GO:0005622	CC	intracellular
w_c.2	6	LOC108206290	GO:0008270	MF	zinc ion binding
w_c.2	6	LOC108209630	GO:0003700	MF	sequence-specific DNA binding transcription factor activity
w_c.2	6	LOC108209630	GO:0006355	BP	regulation of transcription, DNA-dependent
w_c.2	6	LOC108209630	GO:0008270	MF	zinc ion binding
w_c.2	6	LOC108209630	GO:0043565	MF	sequence-specific DNA binding
w_c.2	6	LOC108209191	GO:0005524	MF	ATP binding
w_c.2	6	LOC108206602	GO:0005576	CC	extracellular region
w_c.2	6	LOC108210426	GO:0016020	CC	membrane
w_c.2	6	LOC108215208	GO:0016787	MF	hydrolase activity
w_c.2	6	LOC108214707	GO:0004252	MF	serine-type endopeptidase activity
w_c.2	6	LOC108214707	GO:0006508	BP	proteolysis
w_c.2	6	LOC108214707	GO:0042802	MF	identical protein binding
w_c.2	6	LOC108214707	GO:0043086	BP	negative regulation of catalytic activity
w_c.2	6	LOC108215107	GO:0004553	MF	hydrolase activity, hydrolyzing O-glycosyl compounds
w_c.2	6	LOC108215107	GO:0005975	BP	carbohydrate metabolic process
w_c.2	6	LOC108216523	GO:0005507	MF	copper ion binding
w_c.2	6	LOC108216523	GO:0009055	MF	electron carrier activity
w_c.2	6	LOC108219550	GO:0004672	MF	protein kinase activity
w_c.2	6	LOC108219550	GO:0004713	MF	protein tyrosine kinase activity
w_c.2	6	LOC108219550	GO:0005515	MF	protein binding
w_c.2	6	LOC108219550	GO:0005524	MF	ATP binding
w_c.2	6	LOC108219550	GO:0006468	BP	protein phosphorylation
w_c.2	6	LOC108223433	GO:0005507	MF	copper ion binding
w_c.2	6	LOC108223433	GO:0016491	MF	oxidoreductase activity
w_c.2	6	LOC108223433	GO:0055114	BP	oxidation-reduction process
w_c.2	6	LOC108220420	GO:0004197	MF	cysteine-type endopeptidase activity
w_c.2	6	LOC108220420	GO:0006508	BP	proteolysis
w_c.2	6	LOC108220420	GO:0008234	MF	cysteine-type peptidase activity
w_c.2	6	LOC108222973	GO:0005515	MF	protein binding
w_c.2	6	LOC108223714	GO:0000166	MF	nucleotide binding
w_c.2	6	LOC108223714	GO:0005524	MF	ATP binding
w_c.2	6	LOC108223714	GO:0017111	MF	nucleoside-triphosphatase activity
w_c.2	6	LOC108223883	GO:0000786	CC	nucleosome
w_c.2	6	LOC108223883	GO:0003677	MF	DNA binding
w_c.2	6	LOC108223883	GO:0005634	CC	nucleus
w_c.2	6	LOC108223883	GO:0006334	BP	nucleosome assembly
w_c.2	6	LOC108223042	GO:0006099	BP	tricarboxylic acid cycle
w_c.2	6	LOC108223042	GO:0008964	MF	phosphoenolpyruvate carboxylase activity
w_c.2	6	LOC108223042	GO:0015977	BP	carbon fixation
w_c.2	6	LOC108192895	GO:0005975	BP	carbohydrate metabolic process
w_c.2	6	LOC108192895	GO:0016853	MF	isomerase activity
w_c.2	6	LOC108224579	GO:0005634	CC	nucleus
w_c.2	6	LOC108227582	GO:0004252	MF	serine-type endopeptidase activity
w_c.2	6	LOC108227582	GO:0006508	BP	proteolysis
w_c.2	6	LOC108227582	GO:0042802	MF	identical protein binding
w_c.2	6	LOC108227582	GO:0043086	BP	negative regulation of catalytic activity
w_c.2	6	LOC108224331	GO:0003824	MF	catalytic activity
w_c.2	6	LOC108224331	GO:0044237	BP	cellular metabolic process
w_c.2	6	LOC108224331	GO:0050662	MF	coenzyme binding
w_c.2	6	LOC108225089	GO:0004197	MF	cysteine-type endopeptidase activity
w_c.2	6	LOC108225089	GO:0006508	BP	proteolysis
w_c.2	6	LOC108225089	GO:0008234	MF	cysteine-type peptidase activity
w_c.2	6	LOC108193598	GO:0004602	MF	glutathione peroxidase activity
w_c.2	6	LOC108193598	GO:0006979	BP	response to oxidative stress
w_c.2	6	LOC108193598	GO:0055114	BP	oxidation-reduction process
w_c.2	6	LOC108196842	GO:0004478	MF	methionine adenosyltransferase activity
w_c.2	6	LOC108196842	GO:0005524	MF	ATP binding
w_c.2	6	LOC108196842	GO:0006556	BP	S-adenosylmethionine biosynthetic process
w_c.2	6	LOC108196831	GO:0016747	MF	transferase activity, transferring acyl groups other than amino-acyl groups
w_c.2	6	LOC108198633	GO:0006629	BP	lipid metabolic process
w_c.2	6	LOC108198633	GO:0016717	MF	oxidoreductase activity, acting on paired donors, with oxidation of a pair of donors resulting in the reduction of molecular oxygen to two molecules of water
w_c.2	6	LOC108198633	GO:0055114	BP	oxidation-reduction process
w_c.2	6	LOC108200638	GO:0000079	BP	regulation of cyclin-dependent protein kinase activity
w_c.2	6	LOC108200638	GO:0019901	MF	protein kinase binding
w_c.2	6	LOC108203007	GO:0006099	BP	tricarboxylic acid cycle
w_c.2	6	LOC108203007	GO:0044262	BP	cellular carbohydrate metabolic process
w_c.2	6	LOC108203007	GO:0046912	MF	transferase activity, transferring acyl groups, acyl groups converted into alkyl on transfer
w_c.2	7	LOC108221248	GO:0003735	MF	structural constituent of ribosome
w_c.2	7	LOC108221248	GO:0005622	CC	intracellular
w_c.2	7	LOC108221248	GO:0005840	CC	ribosome
w_c.2	7	LOC108221248	GO:0006412	BP	translation
w_c.2	7	LOC108203703	GO:0005516	MF	calmodulin binding
w_c.2	7	LOC108208521	GO:0005515	MF	protein binding
w_c.2	7	LOC108214328	GO:0008121	MF	ubiquinol-cytochrome-c reductase activity
w_c.2	7	LOC108214328	GO:0009496	MF	plastoquinol-plastocyanin reductase activity
w_c.2	7	LOC108214328	GO:0016020	CC	membrane
w_c.2	7	LOC108214328	GO:0016491	MF	oxidoreductase activity
w_c.2	7	LOC108214328	GO:0016679	MF	oxidoreductase activity, acting on diphenols and related substances as donors
w_c.2	7	LOC108214328	GO:0042651	CC	thylakoid membrane
w_c.2	7	LOC108214328	GO:0051537	MF	2 iron, 2 sulfur cluster binding
w_c.2	7	LOC108214328	GO:0055114	BP	oxidation-reduction process
w_c.2	7	LOC108215290	GO:0003735	MF	structural constituent of ribosome
w_c.2	7	LOC108215290	GO:0005622	CC	intracellular
w_c.2	7	LOC108215290	GO:0005840	CC	ribosome
w_c.2	7	LOC108215290	GO:0006412	BP	translation
w_c.2	7	LOC108210859	GO:0003676	MF	nucleic acid binding
w_c.2	7	LOC108223969	GO:0006457	BP	protein folding
w_c.2	7	LOC108223969	GO:0031072	MF	heat shock protein binding
w_c.2	7	LOC108223969	GO:0051082	MF	unfolded protein binding
w_c.2	7	LOC108219978	GO:0003723	MF	RNA binding
w_c.2	7	LOC108219978	GO:0003735	MF	structural constituent of ribosome
w_c.2	7	LOC108219978	GO:0005622	CC	intracellular
w_c.2	7	LOC108219978	GO:0005840	CC	ribosome
w_c.2	7	LOC108219978	GO:0006412	BP	translation
w_c.2	7	LOC108224991	GO:0006457	BP	protein folding
w_c.2	7	LOC108224991	GO:0016272	CC	prefoldin complex
w_c.2	7	LOC108224991	GO:0051082	MF	unfolded protein binding
w_c.2	7	LOC108228023	GO:0008483	MF	transaminase activity
w_c.2	7	LOC108228023	GO:0030170	MF	pyridoxal phosphate binding
w_c.2	7	LOC108228023	GO:0033014	BP	tetrapyrrole biosynthetic process
w_c.2	7	LOC108228023	GO:0042286	MF	glutamate-1-semialdehyde 2,1-aminomutase activity
w_c.2	7	LOC108192787	GO:0004332	MF	fructose-bisphosphate aldolase activity
w_c.2	7	LOC108192787	GO:0006096	BP	glycolysis
w_c.2	7	LOC108193229	GO:0005515	MF	protein binding
w_c.2	7	LOC108193229	GO:0008270	MF	zinc ion binding
w_c.2	7	LOC108196278	GO:0003746	MF	translation elongation factor activity
w_c.2	7	LOC108196278	GO:0003924	MF	GTPase activity
w_c.2	7	LOC108196278	GO:0005525	MF	GTP binding
w_c.2	7	LOC108196278	GO:0005622	CC	intracellular
w_c.2	7	LOC108196278	GO:0006414	BP	translational elongation
w_c.2	7	LOC108201754	GO:0003755	MF	peptidyl-prolyl cis-trans isomerase activity
w_c.2	7	LOC108201754	GO:0006457	BP	protein folding
w_c.2	7	LOC108192255	GO:0003676	MF	nucleic acid binding
w_c.2	7	LOC108192255	GO:0003723	MF	RNA binding
w_c.2	7	LOC108192255	GO:0004386	MF	helicase activity
w_c.2	7	LOC108192255	GO:0005524	MF	ATP binding
w_c.2	7	LOC108192255	GO:0005634	CC	nucleus
w_c.2	7	LOC108192255	GO:0008026	MF	ATP-dependent helicase activity
w_c.2	7	LOC108192255	GO:0008270	MF	zinc ion binding
w_c.2	8	LOC108202090	GO:0005985	BP	sucrose metabolic process
w_c.2	8	LOC108202090	GO:0009058	BP	biosynthetic process
w_c.2	8	LOC108202090	GO:0016157	MF	sucrose synthase activity
w_c.2	8	LOC108223184	GO:0016491	MF	oxidoreductase activity
w_c.2	8	LOC108223184	GO:0046872	MF	metal ion binding
w_c.2	8	LOC108223184	GO:0055114	BP	oxidation-reduction process
w_c.2	8	LOC108227375	GO:0008883	MF	glutamyl-tRNA reductase activity
w_c.2	8	LOC108227375	GO:0033014	BP	tetrapyrrole biosynthetic process
w_c.2	8	LOC108227375	GO:0050661	MF	NADP binding
w_c.2	8	LOC108227375	GO:0055114	BP	oxidation-reduction process
w_c.2	8	LOC108196730	GO:0004871	MF	signal transducer activity
w_c.2	8	LOC108196730	GO:0005515	MF	protein binding
w_c.2	8	LOC108196730	GO:0009416	BP	response to light stimulus
w_c.2	8	LOC108199406	GO:0003824	MF	catalytic activity
w_c.2	8	LOC108199406	GO:0003857	MF	3-hydroxyacyl-CoA dehydrogenase activity
w_c.2	8	LOC108199406	GO:0006631	BP	fatty acid metabolic process
w_c.2	8	LOC108199406	GO:0008152	BP	metabolic process
w_c.2	8	LOC108199406	GO:0016491	MF	oxidoreductase activity
w_c.2	8	LOC108199406	GO:0055114	BP	oxidation-reduction process
w_c.2	8	LOC108202773	GO:0003676	MF	nucleic acid binding
w_c.2	9	LOC108204926	GO:0003824	MF	catalytic activity
w_c.2	9	LOC108204926	GO:0030151	MF	molybdenum ion binding
w_c.2	9	LOC108204926	GO:0030170	MF	pyridoxal phosphate binding
w_c.2	9	LOC108209326	GO:0003924	MF	GTPase activity
w_c.2	9	LOC108209326	GO:0005525	MF	GTP binding
w_c.2	9	LOC108208966	GO:0006508	BP	proteolysis
w_c.2	9	LOC108208966	GO:0008237	MF	metallopeptidase activity
w_c.2	9	LOC108208966	GO:0008270	MF	zinc ion binding
w_c.2	9	LOC108210161	GO:0016020	CC	membrane
w_c.2	9	LOC108214411	GO:0008152	BP	metabolic process
w_c.2	9	LOC108214411	GO:0016491	MF	oxidoreductase activity
w_c.2	9	LOC108215322	GO:0008883	MF	glutamyl-tRNA reductase activity
w_c.2	9	LOC108215322	GO:0033014	BP	tetrapyrrole biosynthetic process
w_c.2	9	LOC108215322	GO:0050661	MF	NADP binding
w_c.2	9	LOC108215322	GO:0055114	BP	oxidation-reduction process
w_c.2	9	LOC108210620	GO:0005524	MF	ATP binding
w_c.2	9	LOC108217635	GO:0006099	BP	tricarboxylic acid cycle
w_c.2	9	LOC108217635	GO:0008964	MF	phosphoenolpyruvate carboxylase activity
w_c.2	9	LOC108217635	GO:0015977	BP	carbon fixation
w_c.2	9	LOC108218435	GO:0003676	MF	nucleic acid binding
w_c.2	9	LOC108218051	GO:0009058	BP	biosynthetic process
w_c.2	9	LOC108218051	GO:0016851	MF	magnesium chelatase activity
w_c.2	9	LOC108219296	GO:0005506	MF	iron ion binding
w_c.2	9	LOC108219296	GO:0010277	MF	chlorophyllide a oxygenase [overall] activity
w_c.2	9	LOC108219296	GO:0016491	MF	oxidoreductase activity
w_c.2	9	LOC108219296	GO:0016705	MF	oxidoreductase activity, acting on paired donors, with incorporation or reduction of molecular oxygen
w_c.2	9	LOC108219296	GO:0051537	MF	2 iron, 2 sulfur cluster binding
w_c.2	9	LOC108219296	GO:0055114	BP	oxidation-reduction process
w_c.2	9	LOC108222932	GO:0016884	MF	carbon-nitrogen ligase activity, with glutamine as amido-N-donor
w_c.2	9	LOC108223828	GO:0004527	MF	exonuclease activity
w_c.2	9	LOC108223828	GO:0005622	CC	intracellular
w_c.2	9	LOC108223576	GO:0010181	MF	FMN binding
w_c.2	9	LOC108223576	GO:0016491	MF	oxidoreductase activity
w_c.2	9	LOC108223576	GO:0055114	BP	oxidation-reduction process
w_c.2	9	LOC108224543	GO:0003677	MF	DNA binding
w_c.2	9	LOC108224543	GO:0003700	MF	sequence-specific DNA binding transcription factor activity
w_c.2	9	LOC108224543	GO:0005634	CC	nucleus
w_c.2	9	LOC108224543	GO:0006355	BP	regulation of transcription, DNA-dependent
w_c.2	9	LOC108224543	GO:0043565	MF	sequence-specific DNA binding
w_c.2	9	LOC108227495	GO:0003676	MF	nucleic acid binding
w_c.2	9	LOC108227495	GO:0003677	MF	DNA binding
w_c.2	9	LOC108227495	GO:0004386	MF	helicase activity
w_c.2	9	LOC108227495	GO:0005515	MF	protein binding
w_c.2	9	LOC108227495	GO:0005524	MF	ATP binding
w_c.2	9	LOC108227495	GO:0008270	MF	zinc ion binding
w_c.2	9	LOC108195848	GO:0005215	MF	transporter activity
w_c.2	9	LOC108195848	GO:0006857	BP	oligopeptide transport
w_c.2	9	LOC108195848	GO:0006952	BP	defense response
w_c.2	9	LOC108195848	GO:0016020	CC	membrane
w_c.2	9	LOC108195848	GO:0043531	MF	ADP binding
w_c.2	9	LOC108195151	GO:0000166	MF	nucleotide binding
w_c.2	9	LOC108195151	GO:0005524	MF	ATP binding
w_c.2	9	LOC108195151	GO:0017111	MF	nucleoside-triphosphatase activity
w_c.2	9	LOC108195151	GO:0019538	BP	protein metabolic process
w_c.2	9	LOC108199685	GO:0003676	MF	nucleic acid binding
w_c.2	9	LOC108199685	GO:0004386	MF	helicase activity
w_c.2	9	LOC108199685	GO:0005524	MF	ATP binding
w_c.2	9	LOC108199685	GO:0008026	MF	ATP-dependent helicase activity
w_c.2	9	LOC108202833	GO:0010277	MF	chlorophyllide a oxygenase [overall] activity
w_c.2	9	LOC108202833	GO:0016491	MF	oxidoreductase activity
w_c.2	9	LOC108202833	GO:0051537	MF	2 iron, 2 sulfur cluster binding
w_c.2	9	LOC108202833	GO:0055114	BP	oxidation-reduction process
w_c.2	10	LOC108207659	GO:0016021	CC	integral to membrane
w_c.2	10	LOC108209512	GO:0004372	MF	glycine hydroxymethyltransferase activity
w_c.2	10	LOC108209512	GO:0006544	BP	glycine metabolic process
w_c.2	10	LOC108209512	GO:0006563	BP	L-serine metabolic process
w_c.2	10	LOC108209512	GO:0030170	MF	pyridoxal phosphate binding
w_c.2	10	LOC108205179	GO:0000166	MF	nucleotide binding
w_c.2	10	LOC108205179	GO:0005524	MF	ATP binding
w_c.2	10	LOC108205179	GO:0016020	CC	membrane
w_c.2	10	LOC108205179	GO:0016887	MF	ATPase activity
w_c.2	10	LOC108205179	GO:0017111	MF	nucleoside-triphosphatase activity
w_c.2	10	LOC108214287	GO:0003824	MF	catalytic activity
w_c.2	10	LOC108214287	GO:0008299	BP	isoprenoid biosynthetic process
w_c.2	10	LOC108204772	GO:0003677	MF	DNA binding
w_c.2	10	LOC108203409	GO:0005215	MF	transporter activity
w_c.2	10	LOC108203409	GO:0006810	BP	transport
w_c.2	10	LOC108203409	GO:0016020	CC	membrane
w_c.2	10	LOC108203409	GO:0016021	CC	integral to membrane
w_c.2	10	LOC108203409	GO:0022857	MF	transmembrane transporter activity
w_c.2	10	LOC108203409	GO:0022891	MF	substrate-specific transmembrane transporter activity
w_c.2	10	LOC108203409	GO:0055085	BP	transmembrane transport
w_c.2	10	LOC108207191	GO:0003676	MF	nucleic acid binding
w_c.2	10	LOC108207191	GO:0008270	MF	zinc ion binding
w_c.2	10	LOC108204341	GO:0000155	MF	two-component sensor activity
w_c.2	10	LOC108204341	GO:0004673	MF	protein histidine kinase activity
w_c.2	10	LOC108204341	GO:0005515	MF	protein binding
w_c.2	10	LOC108204341	GO:0005524	MF	ATP binding
w_c.2	10	LOC108204341	GO:0007165	BP	signal transduction
w_c.2	10	LOC108204341	GO:0016020	CC	membrane
w_c.2	10	LOC108204341	GO:0016310	BP	phosphorylation
w_c.2	10	LOC108204341	GO:0016772	MF	transferase activity, transferring phosphorus-containing groups
w_c.2	10	LOC108204341	GO:0018106	BP	peptidyl-histidine phosphorylation
w_c.2	10	LOC108203147	GO:0004672	MF	protein kinase activity
w_c.2	10	LOC108203147	GO:0004713	MF	protein tyrosine kinase activity
w_c.2	10	LOC108203147	GO:0005515	MF	protein binding
w_c.2	10	LOC108203147	GO:0005524	MF	ATP binding
w_c.2	10	LOC108203147	GO:0006468	BP	protein phosphorylation
w_c.2	10	LOC108205026	GO:0004672	MF	protein kinase activity
w_c.2	10	LOC108205026	GO:0004713	MF	protein tyrosine kinase activity
w_c.2	10	LOC108205026	GO:0005524	MF	ATP binding
w_c.2	10	LOC108205026	GO:0006468	BP	protein phosphorylation
w_c.2	10	LOC108223476	GO:0003854	MF	3-beta-hydroxy-delta5-steroid dehydrogenase activity
w_c.2	10	LOC108223476	GO:0006694	BP	steroid biosynthetic process
w_c.2	10	LOC108223476	GO:0016616	MF	oxidoreductase activity, acting on the CH-OH group of donors, NAD or NADP as acceptor
w_c.2	10	LOC108223476	GO:0055114	BP	oxidation-reduction process
w_c.2	10	LOC108204671	GO:0004553	MF	hydrolase activity, hydrolyzing O-glycosyl compounds
w_c.2	10	LOC108204671	GO:0005975	BP	carbohydrate metabolic process
w_c.2	10	LOC108195233	GO:0004672	MF	protein kinase activity
w_c.2	10	LOC108195233	GO:0004713	MF	protein tyrosine kinase activity
w_c.2	10	LOC108195233	GO:0005488	MF	binding
w_c.2	10	LOC108195233	GO:0005524	MF	ATP binding
w_c.2	10	LOC108195233	GO:0006468	BP	protein phosphorylation
w_c.2	10	LOC108205283	GO:0004672	MF	protein kinase activity
w_c.2	10	LOC108205283	GO:0005515	MF	protein binding
w_c.2	10	LOC108205283	GO:0005524	MF	ATP binding
w_c.2	10	LOC108205283	GO:0006468	BP	protein phosphorylation
w_c.2	10	LOC108215276	GO:0005506	MF	iron ion binding
w_c.2	10	LOC108215276	GO:0009055	MF	electron carrier activity
w_c.2	10	LOC108215276	GO:0016705	MF	oxidoreductase activity, acting on paired donors, with incorporation or reduction of molecular oxygen
w_c.2	10	LOC108215276	GO:0020037	MF	heme binding
w_c.2	10	LOC108215276	GO:0055114	BP	oxidation-reduction process
w_c.2	10	LOC108210266	GO:0016020	CC	membrane
w_c.2	10	LOC108209287	GO:0008152	BP	metabolic process
w_c.2	10	LOC108209287	GO:0016758	MF	transferase activity, transferring hexosyl groups
w_c.2	10	LOC108209726	GO:0004672	MF	protein kinase activity
w_c.2	10	LOC108209726	GO:0004713	MF	protein tyrosine kinase activity
w_c.2	10	LOC108209726	GO:0005515	MF	protein binding
w_c.2	10	LOC108209726	GO:0005524	MF	ATP binding
w_c.2	10	LOC108209726	GO:0006468	BP	protein phosphorylation
w_c.2	10	LOC108209965	GO:0004185	MF	serine-type carboxypeptidase activity
w_c.2	10	LOC108209965	GO:0006508	BP	proteolysis
w_c.2	10	LOC108210280	GO:0003824	MF	catalytic activity
w_c.2	10	LOC108210280	GO:0009058	BP	biosynthetic process
w_c.2	10	LOC108205918	GO:0004672	MF	protein kinase activity
w_c.2	10	LOC108205918	GO:0004713	MF	protein tyrosine kinase activity
w_c.2	10	LOC108205918	GO:0005524	MF	ATP binding
w_c.2	10	LOC108205918	GO:0006468	BP	protein phosphorylation
w_c.2	10	LOC108205703	GO:0005509	MF	calcium ion binding
w_c.2	10	LOC108205703	GO:0008152	BP	metabolic process
w_c.2	10	LOC108205703	GO:0016746	MF	transferase activity, transferring acyl groups
w_c.2	10	LOC108210016	GO:0004672	MF	protein kinase activity
w_c.2	10	LOC108210016	GO:0004713	MF	protein tyrosine kinase activity
w_c.2	10	LOC108210016	GO:0005524	MF	ATP binding
w_c.2	10	LOC108210016	GO:0006468	BP	protein phosphorylation
w_c.2	10	LOC108209008	GO:0004672	MF	protein kinase activity
w_c.2	10	LOC108209008	GO:0004713	MF	protein tyrosine kinase activity
w_c.2	10	LOC108209008	GO:0005515	MF	protein binding
w_c.2	10	LOC108209008	GO:0005524	MF	ATP binding
w_c.2	10	LOC108209008	GO:0006468	BP	protein phosphorylation
w_c.2	10	LOC108209183	GO:0008270	MF	zinc ion binding
w_c.2	10	LOC108210274	GO:0016787	MF	hydrolase activity
w_c.2	10	LOC108205659	GO:0008152	BP	metabolic process
w_c.2	10	LOC108205659	GO:0016746	MF	transferase activity, transferring acyl groups
w_c.2	10	LOC108206087	GO:0008152	BP	metabolic process
w_c.2	10	LOC108206087	GO:0016491	MF	oxidoreductase activity
w_c.2	10	LOC108209738	GO:0006629	BP	lipid metabolic process
w_c.2	10	LOC108208981	GO:0005622	CC	intracellular
w_c.2	10	LOC108208981	GO:0006810	BP	transport
w_c.2	10	LOC108210118	GO:0004190	MF	aspartic-type endopeptidase activity
w_c.2	10	LOC108210118	GO:0006508	BP	proteolysis
w_c.2	10	LOC108210118	GO:0006629	BP	lipid metabolic process
w_c.2	10	LOC108213112	GO:0004553	MF	hydrolase activity, hydrolyzing O-glycosyl compounds
w_c.2	10	LOC108213112	GO:0005975	BP	carbohydrate metabolic process
w_c.2	10	LOC108211165	GO:0005634	CC	nucleus
w_c.2	10	LOC108210602	GO:0004672	MF	protein kinase activity
w_c.2	10	LOC108210602	GO:0004674	MF	protein serine/threonine kinase activity
w_c.2	10	LOC108210602	GO:0004713	MF	protein tyrosine kinase activity
w_c.2	10	LOC108210602	GO:0005488	MF	binding
w_c.2	10	LOC108210602	GO:0005524	MF	ATP binding
w_c.2	10	LOC108210602	GO:0006468	BP	protein phosphorylation
w_c.2	10	LOC108214189	GO:0004143	MF	diacylglycerol kinase activity
w_c.2	10	LOC108214189	GO:0007205	BP	activation of protein kinase C activity by G-protein coupled receptor protein signaling pathway
w_c.2	10	LOC108211380	GO:0003824	MF	catalytic activity
w_c.2	10	LOC108211380	GO:0008152	BP	metabolic process
w_c.2	10	LOC108214519	GO:0004553	MF	hydrolase activity, hydrolyzing O-glycosyl compounds
w_c.2	10	LOC108214519	GO:0005529	MF	sugar binding
w_c.2	10	LOC108214519	GO:0005975	BP	carbohydrate metabolic process
w_c.2	10	LOC108213355	GO:0005488	MF	binding
w_c.2	10	LOC108210669	GO:0006108	BP	malate metabolic process
w_c.2	10	LOC108210669	GO:0016491	MF	oxidoreductase activity
w_c.2	10	LOC108210669	GO:0016615	MF	malate dehydrogenase activity
w_c.2	10	LOC108210669	GO:0016616	MF	oxidoreductase activity, acting on the CH-OH group of donors, NAD or NADP as acceptor
w_c.2	10	LOC108210669	GO:0030060	MF	L-malate dehydrogenase activity
w_c.2	10	LOC108210669	GO:0055114	BP	oxidation-reduction process
w_c.2	10	LOC108210545	GO:0004672	MF	protein kinase activity
w_c.2	10	LOC108210545	GO:0004674	MF	protein serine/threonine kinase activity
w_c.2	10	LOC108210545	GO:0004713	MF	protein tyrosine kinase activity
w_c.2	10	LOC108210545	GO:0005524	MF	ATP binding
w_c.2	10	LOC108210545	GO:0006468	BP	protein phosphorylation
w_c.2	10	LOC108214352	GO:0004367	MF	glycerol-3-phosphate dehydrogenase [NAD+] activity
w_c.2	10	LOC108214352	GO:0005737	CC	cytoplasm
w_c.2	10	LOC108214352	GO:0005975	BP	carbohydrate metabolic process
w_c.2	10	LOC108214352	GO:0006072	BP	glycerol-3-phosphate metabolic process
w_c.2	10	LOC108214352	GO:0009331	CC	glycerol-3-phosphate dehydrogenase complex
w_c.2	10	LOC108214352	GO:0016614	MF	oxidoreductase activity, acting on CH-OH group of donors
w_c.2	10	LOC108214352	GO:0016616	MF	oxidoreductase activity, acting on the CH-OH group of donors, NAD or NADP as acceptor
w_c.2	10	LOC108214352	GO:0046168	BP	glycerol-3-phosphate catabolic process
w_c.2	10	LOC108214352	GO:0051287	MF	NAD binding
w_c.2	10	LOC108214352	GO:0055114	BP	oxidation-reduction process
w_c.2	10	LOC108210643	GO:0005737	CC	cytoplasm
w_c.2	10	LOC108210643	GO:0006629	BP	lipid metabolic process
w_c.2	10	LOC108210643	GO:0016021	CC	integral to membrane
w_c.2	10	LOC108210643	GO:0016627	MF	oxidoreductase activity, acting on the CH-CH group of donors
w_c.2	10	LOC108215464	GO:0003676	MF	nucleic acid binding
w_c.2	10	LOC108211482	GO:0016747	MF	transferase activity, transferring acyl groups other than amino-acyl groups
w_c.2	10	LOC108214399	GO:0004553	MF	hydrolase activity, hydrolyzing O-glycosyl compounds
w_c.2	10	LOC108214399	GO:0005975	BP	carbohydrate metabolic process
w_c.2	10	LOC108215437	GO:0005576	CC	extracellular region
w_c.2	10	LOC108215437	GO:0009664	BP	plant-type cell wall organization
w_c.2	10	LOC108211268	GO:0005215	MF	transporter activity
w_c.2	10	LOC108211268	GO:0006857	BP	oligopeptide transport
w_c.2	10	LOC108211268	GO:0016020	CC	membrane
w_c.2	10	LOC108215428	GO:0004650	MF	polygalacturonase activity
w_c.2	10	LOC108215428	GO:0005975	BP	carbohydrate metabolic process
w_c.2	10	LOC108214872	GO:0004672	MF	protein kinase activity
w_c.2	10	LOC108214872	GO:0004674	MF	protein serine/threonine kinase activity
w_c.2	10	LOC108214872	GO:0004713	MF	protein tyrosine kinase activity
w_c.2	10	LOC108214872	GO:0005524	MF	ATP binding
w_c.2	10	LOC108214872	GO:0006468	BP	protein phosphorylation
w_c.2	10	LOC108219206	GO:0004222	MF	metalloendopeptidase activity
w_c.2	10	LOC108219206	GO:0005515	MF	protein binding
w_c.2	10	LOC108219206	GO:0006508	BP	proteolysis
w_c.2	10	LOC108219206	GO:0007155	BP	cell adhesion
w_c.2	10	LOC108219206	GO:0008270	MF	zinc ion binding
w_c.2	10	LOC108219206	GO:0016020	CC	membrane
w_c.2	10	LOC108219463	GO:0005215	MF	transporter activity
w_c.2	10	LOC108219463	GO:0006810	BP	transport
w_c.2	10	LOC108219463	GO:0016020	CC	membrane
w_c.2	10	LOC108219463	GO:0016021	CC	integral to membrane
w_c.2	10	LOC108219463	GO:0022857	MF	transmembrane transporter activity
w_c.2	10	LOC108219463	GO:0022891	MF	substrate-specific transmembrane transporter activity
w_c.2	10	LOC108219463	GO:0055085	BP	transmembrane transport
w_c.2	10	LOC108219150	GO:0004672	MF	protein kinase activity
w_c.2	10	LOC108219150	GO:0005524	MF	ATP binding
w_c.2	10	LOC108219150	GO:0006468	BP	protein phosphorylation
w_c.2	10	LOC108215999	GO:0016021	CC	integral to membrane
w_c.2	10	LOC108215999	GO:0055085	BP	transmembrane transport
w_c.2	10	LOC108216511	GO:0005634	CC	nucleus
w_c.2	10	LOC108219251	GO:0015078	MF	hydrogen ion transmembrane transporter activity
w_c.2	10	LOC108219251	GO:0015991	BP	ATP hydrolysis coupled proton transport
w_c.2	10	LOC108219251	GO:0033177	CC	proton-transporting two-sector ATPase complex, proton-transporting domain
w_c.2	10	LOC108219467	GO:0006508	BP	proteolysis
[truncated: 2,999 more rows]
